# Supplementary material for: The Phosphoproteomic Response of Rice Seedlings to Cadmium Stress
Source: Int J Mol Sci. 2017 Sep 27;18(10):2055. doi: 10.3390/ijms18102055 (PMC5666737; doi:10.3390/ijms18102055)
Supplement: Supplementary file 1 [file ijms-18-02055-s001.zip]

Archive with 8 entries (8 files):
- Additional Figure S1, S2.pdf
- Additional file 1-Table S1.xlsx
- Additional file 2-Table S2.xlsx
- Additional file 3-Table S3.xlsx
- Additional file 4-Table S4.xlsx
- Additional file 5-Table S5.xlsx
- Additional file 6 -Table S6.xlsx
- Additional file 7-Table S7.xlsx
