# Supplementary material for: The Phosphoproteomic Response of Rice Seedlings to Cadmium Stress
Source: Int J Mol Sci. 2017 Sep 27;18(10):2055. doi: 10.3390/ijms18102055 (PMC5666737; doi:10.3390/ijms18102055)
Supplement: Supplementary file 1 [file ijms-18-02055-s001.zip › Additional file 1-Table S1.xlsx]

## Sheet: Table S1
Additional file1: Table S1: Complete list of peptides identified in iTRAQ study
Checked	Confidence	Annotated Sequence	Modifications	Modifications in Master Proteins	Qvality PEP	Qvality q-value	# Protein Groups	# Proteins	# PSMs	Master Protein Accessions	Positions in Master Proteins	# Missed Cleavages	Theo. MH+ [Da]	Found in Sample: [S1] F1: 126, Control	Found in Sample: [S2] F1: 127N, Sample	Found in Sample: [S3] F1: 127C, Sample	Found in Sample: [S4] F1: 128N, Sample	Found in Sample: [S5] F1: 128C, Sample	Found in Sample: [S6] F1: 129N, Sample	Found in Sample: [S7] F1: 129C, Sample	Found in Sample: [S8] F1: 130N, Sample	Found in Sample: [S9] F1: 130C, Sample	ptmRS: Best Site Probabilities	Abundance Ratio: (F1, 126) / (F1, 126)	Abundance Ratio: (F1, 127N) / (F1, 126)	Abundance Ratio: (F1, 127C) / (F1, 126)	Abundance Ratio: (F1, 128N) / (F1, 126)	Abundance Ratio: (F1, 128C) / (F1, 126)	Abundance Ratio: (F1, 129N) / (F1, 126)	Abundance Ratio: (F1, 129C) / (F1, 126)	Abundance Ratio: (F1, 130N) / (F1, 126)	Abundance Ratio: (F1, 130C) / (F1, 126)	Abundances Count: F1: 126, Control	Abundances Count: F1: 127N, Sample	Abundances Count: F1: 127C, Sample	Abundances Count: F1: 128N, Sample	Abundances Count: F1: 128C, Sample	Abundances Count: F1: 129N, Sample	Abundances Count: F1: 129C, Sample	Abundances Count: F1: 130N, Sample	Abundances Count: F1: 130C, Sample	Quan Info	XCorr Sequest HT	Confidence Sequest HT	Percolator q-Value Sequest HT	Percolator PEP Sequest HT
FALSE	High	[R].TDPSTPAPTSESPTQGVPSNR.[D]	1xTMT6plex [N-Term]; 1xPhospho [S12(100)]	A0A0P0XKY3 1xPhospho [S208(100)]	4.6855e-07	0	1	1	9	A0A0P0XKY3	A0A0P0XKY3 [197-217]	0	2435.13	High	High	High	High	High	High	High	High	High	S12(Phospho): 100	1	1.13884	0.914575	1.11509	0.823347	0.846338	1.49152	1.287	1.46453	6	6	6	6	6	6	6	6	6	Unique	4.55009	High	0	2.199e-08
FALSE	High	[K].AAASENASDDEK.[N]	2xTMT6plex [N-Term; K12]; 1xPhospho [S8(100)]	Q6K7A6 1xPhospho [S194(100)]	3.03465e-06	0	1	1	3	Q6K7A6	Q6K7A6 [187-198]	0	1745.8	High	High	High	High	High	High	High	High	High	S8(Phospho): 100	1	1.08403	1.00041	1.05743	0.990228	0.91084	0.963099	1.05649	1.13399	3	3	3	3	3	3	3	3	3	Unique	3.83277	High	0	1.938e-07
FALSE	High	[K].ELVESDEDQK.[K]	2xTMT6plex [N-Term; K10]; 1xPhospho [S5(100)]	Q5VQ75 1xPhospho [S153(100)]	0.000233979	0	1	1	3	Q5VQ75	Q5VQ75 [149-158]	0	1729.83	High	High	High	High	High	High	High	High	High	S5(Phospho): 100	1	1.01095	0.877382	0.914749	0.876628	0.743722	1.15629	1.09875	1.23412	3	3	3	3	3	3	3	3	3	Unique	3.25733	High	0	3.084e-05
FALSE	High	[K].EEANADSSDDEQAVHYK.[R]	2xTMT6plex [N-Term; K17]; 2xPhospho [S7(100); S8(100)]	Q5QNL2 2xPhospho [S295(100); S296(100)]	3.74022e-08	0	1	2	3	Q5QNL2	Q5QNL2 [289-305]	0	2526.05	High	High	High	High	High	High	High	High	High	S7(Phospho): 100; S8(Phospho): 100	1	1.05053	1.00517	1.14637	1.09277	1.09066	1.29171	1.39169	1.3451	3	3	3	3	3	3	3	3	3	Unique	5.17485	High	0	1.156e-09
FALSE	High	[R].SMGGDMESGSVK.[D]	2xTMT6plex [N-Term; K12]; 1xPhospho [S10(100)]	Q5N7Q7 1xPhospho [S358(100)]	6.89569e-05	0	1	3	5	Q5N7Q7	Q5N7Q7 [349-360]	0	1722.78	High	High	High	High	High	High	High	High	High	S10(Phospho): 100	1	1.08098	1.02425	1.05059	0.924883	0.877612	1.09189	1.05553	1.1171	5	5	5	5	5	5	5	5	5	Unique	3.79633	High	0	7.426e-06
FALSE	High	[R].DGSPAAAATDHK.[D]	2xTMT6plex [N-Term; K12]; 1xPhospho [S3(100)]	A0A0P0VIS4 1xPhospho [S131(100)]	1.68929e-06	0	1	2	2	A0A0P0VIS4	A0A0P0VIS4 [129-140]	0	1678.82	High	High	High	High	High	High	High	High	High	S3(Phospho): 100	1	0.876965	0.844003	0.842429	0.768055	0.732972	0.822943	0.901859	1.08211	2	2	2	2	2	2	2	2	2	Unique	4.46179	High	0	9.819e-08
FALSE	High	[K].KDEDDDEEVDDSEEGTHDSR.[K]	2xTMT6plex [N-Term; K1]; 1xPhospho [S12(100)]	Q658H5 1xPhospho [S485(100)]	1.33434e-07	0	1	1	2	Q658H5	Q658H5 [474-493]	1	2860.17	High	High	High	High	High	High	High	High	High	S12(Phospho): 100	1	1.07489	1.05095	1.24117	1.10584	0.98316	1.75384	1.77875	2.35845	2	2	2	2	2	2	2	2	2	Unique	5.43346	High	0	5.108e-09
FALSE	High	[K].EQPSSTSADATK.[L]	2xTMT6plex [N-Term; K12]; 1xPhospho [S7(98.2)]	A0A0P0VPQ7 1xPhospho [S261(98.2)]	0.00147057	0	1	1	1	A0A0P0VPQ7	A0A0P0VPQ7 [255-266]	0	1759.85	High	High	High	High	High	High	High	High	High	S7(Phospho): 98.25	1	1.4271	1.33801	1.34867	1.22044	1.16103	1.82013	1.52807	1.56225	1	1	1	1	1	1	1	1	1	Unique	3.21418	High	0	0.0002676
FALSE	High	[K].VAGAGGAAAAESAASDSMSYAASR.[T]	1xTMT6plex [N-Term]; 1xOxidation [M18(100)]; 1xPhospho [S17(99.1)]	Q2QW32 1xPhospho [S930(98.8)]	2.03431e-10	0	1	1	5	Q2QW32	Q2QW32 [914-937]	0	2454.08	High	High	High	High	High	High	High	High	High	S17(Phospho): 99.1; M18(Oxidation): 100	1	0.87798	0.842096	0.974364	0.890703	0.87468	1.2169	1.22169	1.35355	3	3	3	3	3	3	3	3	3	Unique	4.8617	High	0	1.493e-10
FALSE	High	[K].VAGAGGAAAAESAASDSMSYAASR.[T]	1xTMT6plex [N-Term]; 1xPhospho [S17(99.3)]	Q2QW32 1xPhospho [S930(99.3)]	6.10435e-14	0	1	1	4	Q2QW32	Q2QW32 [914-937]	0	2438.09	High	High	High	High	High	High	High	High	High	S17(Phospho): 100	1	1.12869	0.933649	1.0633	1.0425	1.02225	1.22068	1.27355	1.34993	3	3	3	3	3	3	3	3	3	Unique	7.48258	High	0	2.082e-16
FALSE	High	[R].SDGNWGGSRSPPYNESYSDR.[R]	1xTMT6plex [N-Term]; 1xPhospho [S10(100)]	Q6H8D8 1xPhospho [S156(100)]	2.57667e-06	0	1	3	5	Q6H8D8	Q6H8D8 [147-166]	1	2540.07	High	High	High	High	High	High	High	High	High	S10(Phospho): 99.21	1	1.0617	0.832559	1.16689	1.01436	0.98316	1.32106	1.11124	1.3644	4	4	4	4	4	4	4	4	4	Unique	4.08413	High	0	1.608e-07
FALSE	High	[R].KEEGEEDGFSSDGGDTTDAESSDER.[A]	2xTMT6plex [N-Term; K1]; 3xPhospho [S10(100); S21(98.8); T/S]	Q2QPW9 3xPhospho [S21(100); S32(98.1); S/T]	2.5903e-06	0	1	1	5	Q2QPW9	Q2QPW9 [12-36]	1	3347.24	High	High	High	High	High	High	High	High	High	S10(Phospho): 100; S11(Phospho): 99.99; T16(Phospho): 50; T17(Phospho): 50	1	0.931775	1.01566	1.06134	0.824352	0.917681	1.44323	1.25146	1.34993	5	5	5	5	5	5	5	5	5	Unique	3.6936	High	0	1.61e-07
FALSE	High	[K].LEAAEEEGAGSEGEEEAGR.[K]	1xTMT6plex [N-Term]; 1xPhospho [S11(100)]	Q8LIB1 1xPhospho [S335(100)]	2.01618e-11	0	1	1	12	Q8LIB1	Q8LIB1 [325-343]	0	2228.94	High	High	High	High	High	High	High	High	High	S11(Phospho): 100	1	1.15508	1.00231	1.14246	1.08272	1.02812	1.4688	1.39265	1.52606	12	12	12	12	12	12	12	12	12	Unique	6.38559	High	0	1.113e-12
FALSE	High	[K].IPQPSSGQESPTGK.[N]	2xTMT6plex [N-Term; K14]; 1xPhospho [S10(100)]	Q2QT46 1xPhospho [S102(100)]	2.0897e-07	0	1	1	18	Q2QT46	Q2QT46 [93-106]	0	1950.99	High	High	High	High	High	High	High	High	High	S10(Phospho): 100	1	1.10534	1.09291	1.09848	1.02441	1.06916	0.959311	1.01999	1.00973	14	14	14	14	14	14	14	14	14	Unique	5.78133	High	0	1.237e-08
FALSE	High	[K].ASQSGSVEDEDSEY.[-]	1xTMT6plex [N-Term]; 1xPhospho [S6(100)]	Q0IN32 1xPhospho [S93(100)]	0.00107498	0	1	1	3	Q0IN32	Q0IN32 [88-101]	0	1811.71	High	High	High	High	High	High	High	High	High	S6(Phospho): 100	1	0.99775	0.829698	1.02909	0.911814	0.856111	1.26519	1.0392	1.33907	3	3	3	3	3	3	3	3	3	Unique	2.95831	High	0	0.0001844
FALSE	High	[R].TQSMPTTPTTPVTPSSSSPTTTATTTPR.[G]	1xTMT6plex [N-Term]; 2xPhospho [S3(98.8); T6(100)]	Q2QZU5 2xPhospho [S51(99); T68(95.9)]	1.2637e-06	0	1	1	37	Q2QZU5	Q2QZU5 [49-76]	0	3223.47	High	High	High	High	High	High	High	High	High	S3(Phospho): 98.88; T20(Phospho): 97.78	1	1.1297	1.13392	1.3946	1.2697	1.11803	1.50194	1.34559	1.4766	15	15	15	15	15	15	15	15	15	Unique	5.51245	High	0	6.989e-08
FALSE	High	[R].TQSMPTTPTTPVTPSSSSPTTTATTTPR.[G]	1xTMT6plex [N-Term]; 1xOxidation [M4(100)]; 1xPhospho [S3(98.8)]	Q2QZU5 1xPhospho [S51(98.7)]	8.1941e-10	0	1	1	14	Q2QZU5	Q2QZU5 [49-76]	0	3159.5	High	High	High	High	High	High	High	High	High	S3(Phospho): 98.9; M4(Oxidation): 100	1	1.11549	1.02329	1.17862	0.925889	0.991956	1.60516	1.30525	1.60568	7	7	7	7	7	7	7	7	7	Unique	6.1878	High	0	1.344e-11
FALSE	High	[R].TQSMPTTPTTPVTPSSSSPTTTATTTPR.[G]	1xTMT6plex [N-Term]; 1xPhospho [S18(99.1)]	Q2QZU5 1xPhospho [S66(99.1)]	1.34291e-11	0	1	1	36	Q2QZU5	Q2QZU5 [49-76]	0	3143.5	High	High	High	High	High	High	High	High	High	S3(Phospho): 99.2	1	1.06373	1.09863	1.3389	1.0224	1.10825	1.24625	1.21977	1.38009	13	13	13	13	13	13	13	13	13	Unique	7.44275	High	0	1.117e-13
FALSE	High	[R].HPYGGGGGDSASEYSGGGLPSMR.[V]	1xTMT6plex [N-Term]; 2xPhospho [S10(100); S15(98.9)]	Q2QW32 2xPhospho [S950(100); S955(98.9)]	1.52741e-09	0	1	1	5	Q2QW32	Q2QW32 [941-963]	0	2585.04	High	High	High	High	High	High	High	High	High	S10(Phospho): 100; S15(Phospho): 100	1	0.862755	0.778199	0.976319	1.02139	0.929409	1.16292	1.09107	1.08694	4	4	4	4	4	4	4	4	4	Unique	5.02977	High	0	2.778e-11
FALSE	High	[K].SQQSELADSSGEEELAIQR.[L]	1xTMT6plex [N-Term]; 1xPhospho [S]		9.12519e-08	0	1	3	3	Q0D3Z0	Q0D3Z0 [571-589]	0	2386.1	High	High	High	High	High	High	High	High	High	S9(Phospho): 99.4	1	1.07895	1.16825	1.07307	1.29484	1.03593	1.39493	1.31005	1.55863	2	2	2	2	2	2	2	2	2	Unique	4.06792	High	0	3.265e-09
FALSE	High	[R].HPAPNPSPPPAAAAPASSR.[S]	1xTMT6plex [N-Term]; 1xPhospho [S7(100)]	A0A0P0VQF4 1xPhospho [S49(100)]	2.03199e-06	0	1	1	2	A0A0P0VQF4	A0A0P0VQF4 [43-61]	0	2102.04	High	High	High	High	High	High	High	High	High	S7(Phospho): 100	1	1.68694	1.09768	1.4249	1.19933	1.36137	1.46217	1.45316	1.71184	2	2	2	2	2	2	2	2	2	Unique	4.56653	High	0	1.217e-07
FALSE	High	[K].GAGAASTSARTPTPTPSTAGDPR.[R]	1xTMT6plex [N-Term]; 2xPhospho [T11(100); T13(100)]	Q10RH2 2xPhospho [T48(100); T50(100)]	0.0001671	0	1	1	3	Q10RH2	Q10RH2 [38-60]	1	2516.14	High	High	High	High	High	High	High	High	High	T11(Phospho): 99.98; T13(Phospho): 100	1	0.958165	0.916482	0.823861	0.916841	0.763268	1.19417	1.12852	1.3451	3	3	3	3	3	3	3	3	3	Unique	3.75119	High	0	2.077e-05
FALSE	High	[R].LPSASSSPASSPR.[S]	1xTMT6plex [N-Term]; 2xPhospho [S10(99); S]		0.000670499	0	1	1	4	Q53RJ0	Q53RJ0 [62-74]	0	1632.72	High	High	High	High	High	High	High	High	High	S7(Phospho): 99.17; S10(Phospho): 50; S11(Phospho): 50	1	0.95512	0.827791	0.95775	1.16616	0.799428	1.05212	0.981576	1.03265	4	4	4	4	4	4	4	4	4	Unique	3.41602	High	0	0.0001057
FALSE	High	[R].LVPSESEDGSAASPGR.[D]	1xTMT6plex [N-Term]; 1xPhospho [S13(100)]	Q6ATX4 1xPhospho [S412(100)]	1.0484e-08	0	1	1	9	Q6ATX4	Q6ATX4 [400-415]	0	1867.86	High	High	High	High	High	High	High	High	High	S13(Phospho): 100	1	1.15609	1.07289	1.11803	1.01838	1.03202	1.43092	1.36479	1.53571	9	9	9	9	9	9	9	9	9	Unique	5.44052	High	0	4.442e-10
FALSE	High	[K].DASSLGSSSPIQEQNQK.[A]	2xTMT6plex [N-Term; K17]; 2xPhospho [S8(98.9); S9(100)]	A0A0P0VRU9 2xPhospho [S134(99.1); S136(99.1)]	3.05071e-06	0	1	1	9	A0A0P0VRU9	A0A0P0VRU9 [128-144]	0	2394.1	High	High	High	High	High	High	High	High	High	S7(Phospho): 99.99; S8(Phospho): 99.25	1	0.92061	0.847818	0.882498	0.851496	0.815065	1.05117	1.02768	1.17742	5	5	5	5	5	5	5	5	5	Unique	4.00967	High	0	1.951e-07
FALSE	High	[R].TEWAAAPAASQR.[G]	1xTMT6plex [N-Term]; 1xPhospho [S10(100)]	Q6K741 1xPhospho [S510(100)]	0.000613624	0	1	2	3	Q6K741	Q6K741 [501-512]	0	1567.75	High	High	High	High	High	High	High	High	High	S10(Phospho): 100	1	1.02008	0.906946	1.07698	0.870597	0.996842	1.39967	1.21881	1.35837	3	3	3	3	3	3	3	3	3	Unique	2.70259	High	0	9.521e-05
FALSE	High	[K].TDGAEQEGEGSDKSKSDVEDDENDGSGEDE.[-]	3xTMT6plex [N-Term; K13; K15]; 2xPhospho [S14(97.7); S16(97.7)]	Q7XQK2 2xPhospho [S116(97.9); S118(97.9)]	1.42679e-06	0	1	1	7	Q7XQK2	Q7XQK2 [103-132]	2	3977.61	High	High	High	High	High	High	High	High	High	S14(Phospho): 49.52; S16(Phospho): 49.52; S26(Phospho): 99.98	1	0.97339	1.1406	0.932341	0.813294	0.840475	0.982039	0.779882	0.930111	5	5	5	5	5	5	5	5	5	Unique	4.87755	High	0	8.054e-08
FALSE	High	[K].TDGAEQEGEGSDKSKSDVEDDENDGSGEDE.[-]	3xTMT6plex [N-Term; K13; K15]; 3xPhospho [S11(100); S26(100); S/T]	Q7XQK2 3xPhospho [S113(100); S128(98.9); S/T]	1.90551e-12	0	1	1	12	Q7XQK2	Q7XQK2 [103-132]	2	4057.57	High	High	High	High	High	High	High	High	High	S11(Phospho): 100; S14(Phospho): 100; S16(Phospho): 100	1	0.97948	1.17111	1.10923	0.976154	1.15223	0.972569	0.857678	1.00129	12	12	12	12	12	12	12	12	12	Unique	8.28271	High	0	1.148e-14
FALSE	High	[R].ESSSPEMDEAAAEK.[V]	2xTMT6plex [N-Term; K14]; 2xPhospho [S3(99.3); S4(99.3)]	Q2R0I2 2xPhospho [S65(99.3); S66(99.3)]	0.000204084	0	1	1	3	Q2R0I2	Q2R0I2 [63-76]	0	2098.87	High	High	High	High	High	High	High	High	High	S3(Phospho): 99.26; S4(Phospho): 99.26	1	0.95309	1.1673	0.992933	0.88266	0.92159	1.01424	0.975813	1.0423	2	2	2	2	2	2	2	2	2	Unique	3.55102	High	0	0.0002809
FALSE	High	[R].APSDAPPPPPPAPYAGGSPYHR.[H]	1xTMT6plex [N-Term]; 1xPhospho [S18(100)]	Q0J4A3 1xPhospho [S96(100)]	0.000576368	0	1	1	3	Q0J4A3	Q0J4A3 [79-100]	0	2508.19	High	High	High	High	High	High	High	High	High	S18(Phospho): 100	1	1.01298	0.842096	1.11021	0.951021	0.93625	1.60327	1.58858	1.92295	2	2	2	2	2	2	2	2	2	Unique	3.59712	High	0	8.849e-05
FALSE	High	[R].GIVPAGEQSGDESK.[R]	2xTMT6plex [N-Term; K14]; 1xPhospho [S9(100)]	A0A0P0VRH8 1xPhospho [S554(100)]	0.000231532	0	1	1	3	A0A0P0VRH8	A0A0P0VRH8 [546-559]	0	1911.95	High	High	High	High	High	High	High	High	High	S9(Phospho): 100	1	0.96324	0.849725	0.865884	0.972133	0.881521	0.941318	0.891294	0.983191	3	3	3	3	3	3	3	3	3	Unique	3.374	High	0	3.037e-05
FALSE	High	[K].TSQDDESSEEK.[C]	2xTMT6plex [N-Term; K11]; 1xPhospho [S7(100)]	Q10G00 1xPhospho [S272(100)]	0.000821298	0	1	1	2	Q10G00	Q10G00 [266-276]	0	1792.79	High	High	High	High	High	High	High	High	High	S7(Phospho): 100	1	1.11651	1.37234	1.0203	0.836416	0.933318	0.872187	0.771238	1.1364	2	2	2	2	2	2	2	2	2	Unique	2.92842	High	0	0.0001338
FALSE	High	[R].GKHSQSPVCK.[S]	3xTMT6plex [N-Term; K2; K10]; 1xCarbamidomethyl [C9]; 2xPhospho [S4(100); S6(100)]	Q8LHL0 2xPhospho [S204(100); S206(100)]	0.000804414	0	1	1	3	Q8LHL0	Q8LHL0 [201-210]	1	1974.98	High	High	High	High	High	High	High	High	High	S4(Phospho): 100; S6(Phospho): 100	1	0.95512	0.938417	1.16396	1.12997	1.08089	1.55403	1.61739	1.86263	3	3	3	3	3	3	3	3	3	Unique	3.82355	High	0	0.0001307
FALSE	High	[R].ITDETRDDEFDESPSR.[L]	1xTMT6plex [N-Term]; 1xPhospho [S13(100)]	Q0IMW0 1xPhospho [S207(100)]	7.72268e-06	0	1	2	8	Q0IMW0	Q0IMW0 [195-210]	1	2220.95	High	High	High	High	High	High	High	High	High	S13(Phospho): 99.55	1	1.07794	1.03855	1.06428	1.03848	0.953841	1.36841	1.214	1.41266	8	8	8	8	8	8	8	8	8	Unique	4.47577	High	0	8.915e-07
FALSE	High	[R].DGLLQGQATTTSH.[-]	1xTMT6plex [N-Term]; 1xPhospho [S12(99.2)]	Q6L4S3 1xPhospho [S287(99.2)]	1.74053e-05	0	1	2	4	Q6L4S3	Q6L4S3 [276-288]	0	1637.77	High	High	High	High	High	High	High	High	High	S12(Phospho): 99.54	1	0.98557	0.913621	0.952864	0.918851	0.912795	1.1222	1.13237	1.25101	4	4	4	4	4	4	4	4	4	Unique	3.07667	High	0	1.485e-06
FALSE	High	[K].APKPPAPPKDDDESGDEYADEEEEER.[D]	3xTMT6plex [N-Term; K3; K9]; 1xPhospho [S14(100)]	Q60DW3 1xPhospho [S188(100)]	1.17128e-08	0	1	1	2	Q60DW3	Q60DW3 [175-200]	1	3682.69	High	High	High	High	High	High	High	High	High	S14(Phospho): 100	1	1.11651	0.946046	1.15321	1.0606	1.00662	1.43565	1.38592	1.58999	2	2	2	2	2	2	2	2	2	Unique	5.29469	High	0	2.983e-10
FALSE	High	[R].HQVVDDDDDEDDVRSEGHAR.[S]	1xTMT6plex [N-Term]; 1xPhospho [S15(100)]	Q0D934 1xPhospho [S70(100)]	6.53356e-07	0	1	1	2	Q0D934	Q0D934 [56-75]	1	2618.1	High	High	High	High	High	High	High	High	High	S15(Phospho): 100	1	0.956135	0.857354	1.23139	1.11589	1.08773	1.57391	1.35903	1.68771	2	2	2	2	2	2	2	2	2	Unique	5.18987	High	0	3.234e-08
FALSE	High	[K].SDDATEVSEADSPGDSLR.[D]	1xTMT6plex [N-Term]; 3xPhospho [S8(100); S12(100); S16(100)]	Q6ZHZ1 3xPhospho [T700(99.2); S707(100); S711(100)]	4.90537e-06	0	1	1	3	Q6ZHZ1	Q6ZHZ1 [696-713]	0	2319.85	High	High	High	High	High	High	High	High	High	S8(Phospho): 100; S12(Phospho): 100; S16(Phospho): 100	1	1.04546	0.870706	1.06623	0.950016	1.05353	1.47353	1.42818	1.79387	3	3	3	3	3	3	3	3	3	Unique	4.17338	High	0	3.406e-07
FALSE	High	[K].SDDATEVSEADSPGDSLR.[D]	1xTMT6plex [N-Term]; 2xPhospho [S8(100); S12(100)]	Q6ZHZ1 2xPhospho [S707(100); S711(100)]	4.73074e-13	0	1	1	24	Q6ZHZ1	Q6ZHZ1 [696-713]	0	2239.88	High	High	High	High	High	High	High	High	High	S12(Phospho): 100; S16(Phospho): 100	1	1.10027	0.979425	1.11803	0.993244	1.05939	1.49342	1.42914	1.70339	24	24	24	24	24	24	24	24	24	Unique	7.93791	High	0	2.269e-15
FALSE	High	[K].SDDATEVSEADSPGDSLR.[D]	1xTMT6plex [N-Term]; 1xPhospho [S12(100)]	Q6ZHZ1 1xPhospho [S707(100)]	5.01587e-10	0	1	1	12	Q6ZHZ1	Q6ZHZ1 [696-713]	0	2159.92	High	High	High	High	High	High	High	High	High	S12(Phospho): 100	1	1.13579	1.07002	1.06721	0.990228	0.929409	1.22542	1.13333	1.33545	12	12	12	12	12	12	12	12	12	Unique	6.53484	High	0	7.615e-12
FALSE	High	[K].VSEPTGSPAKDSPVGK.[E]	3xTMT6plex [N-Term; K10; K16]; 2xPhospho [S7(100); S12(100)]	Q0DJE5 2xPhospho [S717(100); S722(100)]	3.66959e-06	0	1	1	10	Q0DJE5	Q0DJE5 [711-726]	1	2403.22	High	High	High	High	High	High	High	High	High	S7(Phospho): 100; S12(Phospho): 100	1	1.00892	1.0252	0.895203	0.786151	0.774019	0.916696	0.932593	0.957857	7	7	7	7	7	7	7	7	7	Unique	5.03079	High	0	2.423e-07
FALSE	High	[R].IYLHQEEVPGSR.[R]	1xTMT6plex [N-Term]; 1xPhospho [S11(100)]	Q6H536 1xPhospho [S454(100)]	5.76402e-05	0	1	2	5	Q6H536	Q6H536 [444-455]	0	1736.86	High	High	High	High	High	High	High	High	High	S11(Phospho): 100	1	1.00993	0.952722	0.965569	0.887687	0.902044	1.02465	1.08723	1.11589	5	5	5	5	5	5	5	5	5	Unique	3.98395	High	0	5.998e-06
FALSE	High	[R].RPSGGGGGAGPAAAAVR.[K]	1xTMT6plex [N-Term]; 1xPhospho [S3(100)]	Q0ILJ3 1xPhospho [S6(100)]	6.10035e-07	0	1	2	2	Q0ILJ3	Q0ILJ3 [4-20]	0	1717.87	High	High	High	High	High	High	High	High	High	S3(Phospho): 100	1	1.03632	0.988962	1.033	0.904777	0.87468	1.14019	1.16118	1.24377	2	2	2	2	2	2	2	2	2	Unique	4.7489	High	0	2.99e-08
FALSE	High	[K].SSAAVALK.[G]	2xTMT6plex [N-Term; K8]; 1xPhospho [S1(100)]	Q5ZAJ0 1xPhospho [S140(100)]	0.00024021	0	1	1	4	Q5ZAJ0	Q5ZAJ0 [140-147]	0	1284.73	High	High	High	High	High	High	High	High	High	S1(Phospho): 100	1	1.17538	1.1015	1.05353	0.91483	1.00857	0.777487	0.662708	0.732266	4	4	4	4	4	4	4	4	4	Unique	3.60345	High	0	3.185e-05
FALSE	High	[K].GATDSDSEVDFDR.[K]	1xTMT6plex [N-Term]; 2xPhospho [T3(99.5); S5(100)]	Q6Z3Y5 2xPhospho [S262(100); S264(100)]	2.41855e-06	0	1	2	17	Q6Z3Y5	Q6Z3Y5 [258-270]	0	1802.67	High	High	High	High	High	High	High	High	High	T3(Phospho): 50; S5(Phospho): 50; S7(Phospho): 100	1	1.11042	1.02616	1.07112	0.956048	0.934295	1.29076	1.20536	1.39215	14	14	14	14	14	14	14	14	14	Unique	4.59711	High	0	1.489e-07
FALSE	High	[K].GATDSDSEVDFDR.[K]	1xTMT6plex [N-Term]; 1xPhospho [S5(100)]	Q6Z3Y5 1xPhospho [S262(100)]	0.000930133	0	1	2	7	Q6Z3Y5	Q6Z3Y5 [258-270]	0	1722.71	High	High	High	High	High	High	High	High	High	S5(Phospho): 100	1	1.05256	1.09387	0.922568	0.88065	0.862953	1.09	1.03728	1.18104	4	4	4	4	4	4	4	4	4	Unique	2.6461	High	0	0.000257
FALSE	High	[K].NVPEMDAAGEENGHSPEIR.[E]	1xTMT6plex [N-Term]; 1xPhospho [S15(100)]	Q6ZBH4 1xPhospho [S463(100)]	4.08281e-10	0	1	1	3	Q6ZBH4	Q6ZBH4 [449-467]	0	2361.04	High	High	High	High	High	High	High	High	High	S15(Phospho): 100	1	1.02617	1.0128	1.02714	0.97917	1.01737	1.40914	1.34943	1.49952	3	3	3	3	3	3	3	3	3	Unique	5.97953	High	0	5.974e-12
FALSE	High	[K].SPPVSPVK.[N]	2xTMT6plex [N-Term; K8]; 2xPhospho [S1(100); S5(100)]	A0A0P0X1C3 2xPhospho [S805(100); S809(100)]	0.000161055	0	1	1	22	A0A0P0X1C3	A0A0P0X1C3 [805-812]	0	1428.73	High	High	High	High	High	High	High	High	High	S1(Phospho): 100; S5(Phospho): 100	1	1.09316	1.00613	0.88934	0.725832	0.761314	0.916696	0.920108	0.881856	22	22	22	22	22	22	22	22	22	Unique	4.47563	High	0	3.337e-05
FALSE	High	[K].QQAAAASPGPDQKDEELDPK.[F]	3xTMT6plex [N-Term; K13; K20]; 1xPhospho [S7(100)]	Q6L4S2 1xPhospho [S17(100)]	0.000148044	0	1	1	1	Q6L4S2	Q6L4S2 [11-30]	1	2862.45	High	High	High	High	High	High	High	High	High	S7(Phospho): 100	1	1.20583	1.19591	1.04962	0.673556	0.938204	0.911961	1.0344	1.17259	1	1	1	1	1	1	1	1	1	Unique	3.39626	High	0	1.809e-05
FALSE	High	[R].QPSPPLQQPAAEEK.[A]	2xTMT6plex [N-Term; K14]; 1xPhospho [S3(100)]	Q7X6J4 1xPhospho [S55(100)]	1.2637e-06	0	1	1	6	Q7X6J4	Q7X6J4 [53-66]	0	2058.07	High	High	High	High	High	High	High	High	High	S3(Phospho): 100	1	1.07794	1.01853	1.00759	0.900756	0.87468	0.950788	1.06225	1.12916	6	6	6	6	6	6	6	6	6	Unique	5.04318	High	0	6.994e-08
FALSE	High	[R].TINESMDELSSQSK.[S]	2xTMT6plex [N-Term; K14]; 1xOxidation [M6(100)]; 2xPhospho [S5(100); T/S]	Q0DG76 2xPhospho [S544(98.8); S/T]	5.65655e-06	0	1	1	26	Q0DG76	Q0DG76 [534-547]	0	2202.96	High	High	High	High	High	High	High	High	High	T1(Phospho): 100; S5(Phospho): 100; M6(Oxidation): 100	1	0.96324	1.04141	1.32717	1.27875	1.40535	1.22731	1.17078	1.21723	18	18	18	18	18	18	18	18	18	Unique	4.04922	High	0	4.013e-07
FALSE	High	[R].TINESMDELSSQSK.[S]	2xTMT6plex [N-Term; K14]; 2xPhospho [T1(100); S5(100)]	Q0DG76 2xPhospho [T534(100); S538(100)]	8.68793e-07	0	1	1	44	Q0DG76	Q0DG76 [534-547]	0	2186.97	High	High	High	High	High	High	High	High	High	T1(Phospho): 100; S11(Phospho): 99.49	1	1.03429	1.15204	1.4376	1.30992	1.46008	1.14208	1.14101	1.22085	35	35	35	35	35	35	35	35	35	Unique	4.88913	High	0	4.516e-08
FALSE	High	[R].TINESMDELSSQSK.[S]	2xTMT6plex [N-Term; K14]; 1xOxidation [M6(100)]; 1xPhospho [S11(100)]		4.38184e-08	0	1	1	21	Q0DG76	Q0DG76 [534-547]	0	2123	High	High	High	High	High	High	High	High	High	T1(Phospho): 100; M6(Oxidation): 100	1	0.943955	1.00041	1.13073	1.17319	1.15614	1.06632	1.15061	1.02783	18	18	18	18	18	18	18	18	18	Unique	5.10151	High	0	1.388e-09
FALSE	High	[R].TINESMDELSSQSK.[S]	2xTMT6plex [N-Term; K14]; 1xPhospho [T1(100)]	Q0DG76 1xPhospho [T534(100)]	2.98564e-09	0	1	1	47	Q0DG76	Q0DG76 [534-547]	0	2107	High	High	High	High	High	High	High	High	High	T1(Phospho): 100	1	0.990645	1.11675	1.27146	1.21341	1.32521	1.13261	1.26779	1.24739	40	40	40	40	40	40	40	40	40	Unique	5.79411	High	0	6.075e-11
FALSE	High	[K].DASSLGSSSPIQEQNQK.[A]	2xTMT6plex [N-Term; K17]; 1xPhospho [S8(99)]	A0A0P0VRU9 1xPhospho [S135(99)]	2.42247e-07	0	1	1	16	A0A0P0VRU9	A0A0P0VRU9 [128-144]	0	2314.13	High	High	High	High	High	High	High	High	High	S8(Phospho): 99.46	1	1.04343	0.989915	0.967523	0.941973	0.914749	1.06537	1.00655	1.06643	8	8	8	8	8	8	8	8	8	Unique	4.9176	High	0	1.023e-08
FALSE	High	[K].LEDSETEGGTTQAPSK.[K]	2xTMT6plex [N-Term; K16]; 1xPhospho [S4(100)]	Q6K5Q1 1xPhospho [S610(100)]	1.24586e-07	0	1	1	5	Q6K5Q1	Q6K5Q1 [607-622]	0	2188.04	High	High	High	High	High	High	High	High	High	S4(Phospho): 100	1	1.0211	0.937463	0.977296	0.903772	0.955796	1.20837	1.31197	1.25462	5	5	5	5	5	5	5	5	5	Unique	5.69614	High	0	4.715e-09
FALSE	High	[R].EIDADDSDVEPR.[S]	1xTMT6plex [N-Term]; 1xPhospho [S7(100)]	Q9LWY5 1xPhospho [S113(100)]	1.29525e-05	0	1	2	8	Q9LWY5	Q9LWY5 [107-118]	0	1669.72	High	High	High	High	High	High	High	High	High	S7(Phospho): 100	1	1.12666	0.969888	0.973387	0.83139	0.774019	1.04454	0.911463	1.14002	8	8	8	8	8	8	8	8	8	Unique	4.22903	High	0	1.056e-06
FALSE	High	[R].RAPAPAPAPLTPALSQR.[F]	1xTMT6plex [N-Term]; 1xPhospho [S15(100)]	Q0DPW6 1xPhospho [S29(100)]	1.55178e-09	0	1	1	6	Q0DPW6	Q0DPW6 [15-31]	1	2023.11	High	High	High	High	High	High	High	High	High	S15(Phospho): 100	1	1.01196	0.952722	0.989024	0.998271	0.924522	1.16765	1.16694	1.2498	6	6	6	6	6	6	6	6	6	Unique	6.42426	High	0	2.827e-11
FALSE	High	[K].GDSDEEDDDYDKR.[R]	2xTMT6plex [N-Term; K12]; 1xPhospho [S3(100)]	Q84L14 1xPhospho [S230(100)]	0.000180826	0	1	1	3	Q84L14	Q84L14 [228-240]	1	2096.87	High	High	High	High	High	High	High	High	High	S3(Phospho): 100	1	1.12463	0.980379	1.34183	1.00631	1.04766	1.59854	1.37824	1.55139	3	3	3	3	3	3	3	3	3	Unique	3.83411	High	0	2.283e-05
FALSE	High	[K].QQLSQEQGKPVVSG.[-]	2xTMT6plex [N-Term; K9]; 1xPhospho [S13(100)]	Q6YW53 1xPhospho [S200(100)]	0.000524635	0	1	1	2	Q6YW53	Q6YW53 [188-201]	0	2023.06	High	High	High	High	High	High	High	High	High	S13(Phospho): 100	1	0.9673	1.00708	0.995865	0.823347	0.908885	1.17144	1.16022	1.29082	2	2	2	2	2	2	2	2	2	Unique	3.11022	High	0	7.933e-05
FALSE	High	[K].LEAAEEEGAGSEGEEEAGRK.[N]	2xTMT6plex [N-Term; K20]; 1xPhospho [S11(100)]	Q8LIB1 1xPhospho [S335(100)]	2.59743e-11	0	1	1	5	Q8LIB1	Q8LIB1 [325-344]	1	2586.2	High	High	High	High	High	High	High	High	High	S11(Phospho): 100	1	1.06677	1.20259	1.10239	1.20034	1.04571	1.52183	1.38688	1.38612	5	5	5	5	5	5	5	5	5	Unique	6.37872	High	0	8.236e-13
FALSE	High	[R].SPQDQVSPPPK.[D]	2xTMT6plex [N-Term; K11]; 2xPhospho [S1(100); S7(100)]	Q0DL70 2xPhospho [S233(100); S239(100)]	6.94916e-06	0	1	2	16	Q0DL70	Q0DL70 [233-243]	0	1797.86	High	High	High	High	High	High	High	High	High	S1(Phospho): 100; S7(Phospho): 100	1	1.0282	0.773431	0.851225	0.76705	0.803337	0.907226	0.94796	1.03868	16	16	16	16	16	16	16	16	16	Unique	4.56894	High	0	1.104e-06
FALSE	High	[K].VVADDADADADGKSADDK.[V]	3xTMT6plex [N-Term; K13; K18]; 1xPhospho [S14(100)]	Q8RZQ8 1xPhospho [S264(100)]	7.23427e-08	0	1	1	9	Q8RZQ8	Q8RZQ8 [251-268]	1	2545.23	High	High	High	High	High	High	High	High	High	S14(Phospho): 100	1	1.08809	0.996591	0.793564	0.669535	0.666516	0.561571	0.51576	0.565787	9	9	9	9	9	9	9	9	9	Unique	5.20762	High	0	2.5e-09
FALSE	High	[K].SAAEASGDADEDAEPEQPSSPSVK.[K]	2xTMT6plex [N-Term; K24]; 1xPhospho [S20(99.4)]		7.94764e-14	0	1	1	45	Q10FH5	Q10FH5 [223-246]	0	2912.31	High	High	High	High	High	High	High	High	High	S20(Phospho): 100	1	0.992675	1.00231	1.02518	0.966101	1.00857	1.29739	1.26587	1.34028	21	21	21	21	21	21	21	21	21	Unique	7.65625	High	0	2.84e-16
FALSE	High	[R].QPIGTAAQGSDDKDYK.[E]	3xTMT6plex [N-Term; K13; K16]; 1xPhospho [S/T/Y]		1.54433e-06	0	1	1	10	Q7XSQ9	Q7XSQ9 [19-34]	1	2461.26	High	High	High	High	High	High	High	High	High	S10(Phospho): 100	1	1.04444	1.01471	1.20598	0.892713	1.08871	0.817261	0.843272	0.872205	9	9	9	9	9	9	9	9	9	Unique	4.59591	High	0	8.82e-08
FALSE	High	[R].VHSGSVSPLHPR.[AS]	1xTMT6plex [N-Term]; 2xPhospho [S3(100); S7(99.3)]	Q6ESH1 2xPhospho [S335(100); S339(99.3)]	0.000779725	0	1	2	2	Q6ESH1	Q6ESH1 [333-344]	0	1661.78	High	High	High	High	High	High	High	High	High	S3(Phospho): 99.99; S7(Phospho): 99.31	1	1.06068	0.899316	0.860998	0.808268	1.08382	1.09	1.14677	1.26548	1	1	1	1	1	1	1	1	1	Unique	3.1848	High	0	0.0001262
FALSE	High	[R].QQSGHGGYGYGGGQQQEYYK.[R]	2xTMT6plex [N-Term; K20]; 1xPhospho [S3(100)]	Q94DL7 1xPhospho [S73(100)]	1.07989e-10	0	1	1	7	Q94DL7	Q94DL7 [71-90]	0	2730.23	High	High	High	High	High	High	High	High	High	S3(Phospho): 100	1	1.23628	1.19209	0.859043	0.944989	0.960682	3.06733	2.65659	2.7276	7	7	7	7	7	7	7	7	7	Unique	6.47973	High	0	5.294e-12
FALSE	High	[K].SDSEEDDYDSEKEK.[A]	3xTMT6plex [N-Term; K12; K14]; 2xPhospho [S3(100); S10(100)]	Q10H93 2xPhospho [S506(100); S513(100)]	0.000313986	0	1	1	2	Q10H93	Q10H93 [504-517]	1	2523.07	High	High	High	High	High	High	High	High	High	S3(Phospho): 99.99; S10(Phospho): 100	1	1.05459	1.19305	0.933318	0.729854	0.790633	1.11083	1.01807	1.12313	2	2	2	2	2	2	2	2	2	Unique	3.9919	High	0	4.354e-05
FALSE	High	[K].AWPGSGATNDANSSR.[G]	1xTMT6plex [N-Term]; 1xPhospho [S13(99.3)]	Q7XCS9 1xPhospho [S561(99.5)]	4.17846e-05	0	1	1	4	Q7XCS9	Q7XCS9 [549-563]	0	1799.79	High	High	High	High	High	High	High	High	High	S13(Phospho): 99.31	1	1.18959	0.976564	1.16201	1.04854	0.958728	1.19322	1.0296	0.984397	2	2	2	2	2	2	2	2	2	Unique	4.05057	High	0	4.124e-06
FALSE	High	[R].LVENDNDSGNDEK.[K]	2xTMT6plex [N-Term; K13]; 1xPhospho [S8(100)]	A0A0P0X610 1xPhospho [S383(100)]	9.28922e-06	0	1	1	5	A0A0P0X610	A0A0P0X610 [376-388]	0	1986.91	High	High	High	High	High	High	High	High	High	S8(Phospho): 100	1	1.12158	1.03474	1.07893	1.03145	1.00075	1.27371	1.117	1.26789	5	5	5	5	5	5	5	5	5	Unique	4.16239	High	0	7.17e-07
FALSE	High	[R].GGSTGYDNAVALPAGGR.[G]	1xTMT6plex [N-Term]; 1xPhospho [S3(100)]	Q943W1 1xPhospho [S251(100)]	3.86055e-08	0	1	1	7	Q943W1	Q943W1 [249-265]	0	1871.89	High	High	High	High	High	High	High	High	High	S3(Phospho): 100	1	1.07286	0.991823	0.934295	1.01637	1.02518	1.04833	0.999825	1.26428	4	4	4	4	4	4	4	4	4	Unique	4.82557	High	0	1.202e-09
FALSE	High	[K].ALGSFRSNPSN.[-]	1xTMT6plex [N-Term]; 3xPhospho [S4(100); S7(100); S10(100)]	Q7XLR1 3xPhospho [S275(100); S278(100); S281(100)]	0.000869538	0	1	2	29	Q7XLR1	Q7XLR1 [272-282]	1	1618.63	High	High	High	High	High	High	High	High	High	S4(Phospho): 100; S7(Phospho): 100; S10(Phospho): 100	1	1.1094	0.908853	1.98196	1.29484	1.24508	0.637331	0.674233	0.630931	29	29	29	29	29	29	29	29	29	Unique	4.03406	High	6.595e-05	0.000566
FALSE	High	[K].ALGSFRSNPSN.[-]	1xTMT6plex [N-Term]; 2xPhospho [S4(100); S7(100)]	Q7XLR1 2xPhospho [S275(100); S278(100)]	0.00131388	0	1	2	32	Q7XLR1	Q7XLR1 [272-282]	1	1538.66	High	High	High	High	High	High	High	High	High	S4(Phospho): 100; S7(Phospho): 100	1	1.09824	0.982286	1.33792	0.830384	0.855134	0.392058	0.400506	0.353466	28	28	28	28	28	28	28	28	28	Unique	3.69481	High	6.595e-05	0.0006693
FALSE	High	[K].ALGSFRSNPSN.[-]	1xTMT6plex [N-Term]; 1xPhospho [S7(100)]	Q7XLR1 1xPhospho [S278(100)]	0.00165366	0	1	2	11	Q7XLR1	Q7XLR1 [272-282]	1	1458.69	High	High	High	High	High	High	High	High	High	S7(Phospho): 100	1	1.23932	1.24359	1.32326	1.07065	1.04571	0.673317	0.622369	0.540454	11	11	11	11	11	11	11	11	11	Unique	2.79596	High	0.0002432	0.002013
FALSE	High	[R].RESLDPELPGASSSSSSSR.[R]	1xTMT6plex [N-Term]; 1xPhospho [S3(100)]	A0A0P0W185 1xPhospho [S144(100)]	4.8954e-08	0	1	1	5	A0A0P0W185	A0A0P0W185 [142-160]	1	2258.05	High	High	High	High	High	High	High	High	High	S3(Phospho): 100	1	1.17639	1.08528	1.18351	1.05959	1.12878	1.45743	1.24474	1.50796	5	5	5	5	5	5	5	5	5	Unique	5.6385	High	0	1.58e-09
FALSE	High	[K].AAAAEAAAPDAGVSSPQGGGGEK.[E]	2xTMT6plex [N-Term; K23]; 1xPhospho [S15(100)]	B7EFQ5 1xPhospho [S21(100)]	1.07593e-11	0	1	1	25	B7EFQ5	B7EFQ5 [7-29]	0	2507.22	High	High	High	High	High	High	High	High	High	S15(Phospho): 100	1	1.00181	1.01376	0.971432	0.895729	0.855134	0.947947	0.971011	0.997668	13	13	13	13	13	13	13	13	13	Unique	6.85908	High	0	8.608e-14
FALSE	High	[R].AGSSATVLSAPDSPR.[A]	1xTMT6plex [N-Term]; 2xPhospho [S9(100); S13(100)]	Q6K688 2xPhospho [S310(100); S314(100)]	2.04274e-06	0	1	1	5	Q6K688	Q6K688 [302-316]	0	1804.81	High	High	High	High	High	High	High	High	High	S9(Phospho): 100; S13(Phospho): 100	1	0.95918	0.868799	0.942114	0.906788	0.899112	1.07958	1.13237	1.21119	5	5	5	5	5	5	5	5	5	Unique	4.21254	High	0	1.225e-07
FALSE	High	[R].AGSSATVLSAPDSPR.[A]	1xTMT6plex [N-Term]; 1xPhospho [S13(100)]	Q6K688 1xPhospho [S314(100)]	2.14952e-05	0	1	1	4	Q6K688	Q6K688 [302-316]	0	1724.84	High	High	High	High	High	High	High	High	High	S13(Phospho): 100	1	1.11549	0.969888	1.00173	0.934936	0.86393	1.24625	1.14485	1.26066	4	4	4	4	4	4	4	4	4	Unique	4.15585	High	0	2.214e-06
FALSE	High	[K].SLGLGNEDGSR.[R]	1xTMT6plex [N-Term]; 1xPhospho [S10(100)]	Q6ZCC6 1xPhospho [S140(100)]	8.60452e-05	0	1	1	6	Q6ZCC6	Q6ZCC6 [131-141]	0	1413.66	High	High	High	High	High	High	High	High	High	S10(Phospho): 100	1	1.03632	0.623704	0.773041	0.761018	0.725154	0.669529	0.64638	0.642995	6	6	6	6	6	6	6	6	6	Unique	3.60566	High	0	6.688e-05
FALSE	High	[R].HEPLTPDSNCQPGSPTASPK.[H]	2xTMT6plex [N-Term; K20]; 1xCarbamidomethyl [C10]; 3xPhospho [T5(100); T16(98.1); S18(100)]	A0A0P0XKY3 3xPhospho [T242(100); T253(98.1); S255(100)]	5.43164e-07	0	1	1	8	A0A0P0XKY3	A0A0P0XKY3 [238-257]	0	2818.2	High	High	High	High	High	High	High	High	High	T5(Phospho): 100; S14(Phospho): 100; S18(Phospho): 100	1	1.09418	1.07098	1.14539	1.08272	1.04864	1.41008	1.28508	1.41748	7	7	7	7	7	7	7	7	7	Unique	5.7555	High	0	2.613e-08
FALSE	High	[R].HEPLTPDSNCQPGSPTASPK.[H]	2xTMT6plex [N-Term; K20]; 1xCarbamidomethyl [C10]; 2xPhospho [S14(97.8); S18(100)]	A0A0P0XKY3 2xPhospho [S251(97.8); S255(100)]	0.000212853	0	1	1	2	A0A0P0XKY3	A0A0P0XKY3 [238-257]	0	2738.23	High	High	High	High	High	High	High	High	High	S14(Phospho): 97.79; S18(Phospho): 100	1	0.89422	1.0128	1.02421	0.991234	0.903022	1.4044	1.1266	1.27151	2	2	2	2	2	2	2	2	2	Unique	4.27295	High	0	2.759e-05
FALSE	High	[K].QEVAPQDEASADSPAVK.[Q]	2xTMT6plex [N-Term; K17]; 1xPhospho [S13(100)]	Q6Z3Y5 1xPhospho [S470(100)]	1.00506e-08	0	1	1	2	Q6Z3Y5	Q6Z3Y5 [458-474]	0	2280.12	High	High	High	High	High	High	High	High	High	S13(Phospho): 100	1	1.02414	1.09387	1.08871	1.00631	0.992933	1.215	1.22361	1.35837	2	2	2	2	2	2	2	2	2	Unique	5.26504	High	0	2.503e-10
FALSE	High	[R].SGSLGSSDTAYVR.[A]	1xTMT6plex [N-Term]; 1xPhospho [S3(100)]	Q75J49 1xPhospho [S20(100)]	5.24208e-05	0	1	1	5	Q75J49	Q75J49 [18-30]	0	1608.75	High	High	High	High	High	High	High	High	High	S3(Phospho): 100	1	0.832304	0.717164	0.620583	0.74996	0.779882	0.667635	0.829826	1.00008	5	5	5	5	5	5	5	5	5	Unique	4.33497	High	0	5.368e-06
FALSE	High	[K].ESKSDDDQTVK.[K]	3xTMT6plex [N-Term; K3; K11]; 1xPhospho [S/T]	Q6Z7S3 1xPhospho [S387(99.7)]	0.001348	0	1	1	4	Q6Z7S3	Q6Z7S3 [384-394]	1	2019.03	High	High	High	High	High	High	High	High	High	S2(Phospho): 99.45	1	1.22308	0.971796	0.878589	0.684615	0.707562	0.711197	0.740504	0.786553	3	3	3	3	3	3	3	3	3	Unique	3.18093	High	0	0.0002409
FALSE	High	[R].APSDAPPPPPPAPYAGGSPYHR.[H]	1xTMT6plex [N-Term]; 2xPhospho [S3(100); S18(100)]	Q0J4A3 2xPhospho [S81(100); S96(100)]	0.000156871	0	1	1	3	Q0J4A3	Q0J4A3 [79-100]	0	2588.16	High	High	High	High	High	High	High	High	High	S3(Phospho): 100; S18(Phospho): 100	1	0.9064	1.02711	1.09946	0.978165	0.944068	1.25572	1.05649	1.28599	3	3	3	3	3	3	3	3	3	Unique	4.202	High	0	0.0001918
FALSE	High	[K].AHGTAVGLPSEDDMGNSEVGHNALGAGR.[I]	1xTMT6plex [N-Term]; 1xPhospho [S17(100)]	Q5QMK7 1xPhospho [S81(100)]	6.74818e-14	0	1	1	4	Q5QMK7	Q5QMK7 [65-92]	0	3028.38	High	High	High	High	High	High	High	High	High	S17(Phospho): 100	1	1.17944	0.996591	1.15712	1.16214	1.00955	1.76142	1.60683	1.78784	4	4	4	4	4	4	4	4	4	Unique	8.26112	High	0	2.346e-16
FALSE	High	[K].NHGSDEEEHDMNEDAADGK.[D]	2xTMT6plex [N-Term; K19]; 1xPhospho [S4(100)]	Q53PP7 1xPhospho [S136(100)]	6.90975e-09	0	1	1	1	Q53PP7	Q53PP7 [133-151]	0	2638.08	High	High	High	High	High	High	High	High	High	S4(Phospho): 100	1	1.06779	1.31607	1.40144	0.984196	1.22553	1.78036	1.60779	1.98206	1	1	1	1	1	1	1	1	1	Unique	5.85366	High	0	1.616e-10
FALSE	High	[R].KPPSDGSDDEEEEQEDWR.[E]	2xTMT6plex [N-Term; K1]; 2xPhospho [S4(100); S7(100)]	P16081 2xPhospho [S64(100); S67(100)]	2.54438e-08	0	1	2	12	P16081	P16081 [61-78]	0	2766.12	High	High	High	High	High	High	High	High	High	S4(Phospho): 100; S7(Phospho): 100	1	0.85565	0.819207	0.903999	1.01436	0.880544	0.803056	0.739544	0.769664	12	12	12	12	12	12	12	12	12	Unique	5.83354	High	0	7.401e-10
FALSE	High	[R].KPPSDGSDDEEEEQEDWR.[E]	2xTMT6plex [N-Term; K1]; 1xPhospho [S7(100)]	P16081 1xPhospho [S67(100)]	1.56574e-08	0	1	2	29	P16081	P16081 [61-78]	0	2686.16	High	High	High	High	High	High	High	High	High	S7(Phospho): 100	1	0.835349	0.789644	0.742745	0.852501	0.816042	0.626914	0.550336	0.66109	29	29	29	29	29	29	29	29	29	Unique	5.86099	High	0	5.394e-10
FALSE	High	[R].GLVPVGGGGGSGR.[H]	1xTMT6plex [N-Term]; 1xPhospho [S11(100)]	Q5KS50 1xPhospho [S24(100)]	4.29012e-05	0	1	1	4	Q5KS50	Q5KS50 [14-26]	0	1378.7	High	High	High	High	High	High	High	High	High	S11(Phospho): 100	1	1.20684	1.14823	1.29003	0.953032	0.968501	0.614603	0.577228	0.813093	4	4	4	4	4	4	4	4	4	Unique	3.4717	High	0	4.267e-06
FALSE	High	[R].SPVYGSYDRSPVNDR.[Y]	1xTMT6plex [N-Term]; 2xPhospho [S1(100); S10(99.1)]	Q7XTJ6 2xPhospho [S210(100); S219(100)]	0.000610431	0	1	1	10	Q7XTJ6	Q7XTJ6 [210-224]	1	2100.9	High	High	High	High	High	High	High	High	High	S1(Phospho): 99.99; S10(Phospho): 100	1	1.04647	1.02043	1.0975	0.967106	1.01737	1.072	1.08723	1.15088	8	8	8	8	8	8	8	8	8	Unique	3.63674	High	0	9.447e-05
FALSE	High	[R].SPVYGSYDRSPVNDR.[Y]	1xTMT6plex [N-Term]; 1xPhospho [S10(100)]	Q7XTJ6 1xPhospho [S219(100)]	2.12696e-05	0	1	1	2	Q7XTJ6	Q7XTJ6 [210-224]	1	2020.93	High	High	High	High	High	High	High	High	High	S10(Phospho): 100	1	1.15609	1.13678	1.13171	1.08272	0.995865	1.4849	1.36191	1.33063	2	2	2	2	2	2	2	2	2	Unique	3.8664	High	0	1.88e-06
FALSE	High	[K].AKTDGAEQEGEGSDK.[S]	3xTMT6plex [N-Term; K2; K15]; 1xPhospho [S13(100)]	Q7XQK2 1xPhospho [S113(100)]	0.000275367	0	1	1	1	Q7XQK2	Q7XQK2 [101-115]	1	2289.12	High	High	High	High	High	High	High	High	High	S13(Phospho): 100	1	1.29718	2.11621	1.69561	1.54516	1.94482	2.59478	1.36287	1.72993	1	1	1	1	1	1	1	1	1	Unique	3.10719	High	0	3.724e-05
FALSE	High	[R].EEGEISESEAETK.[Y]	2xTMT6plex [N-Term; K13]; 2xPhospho [S6(100); S8(100)]	Q0D3X9 2xPhospho [S582(100); S584(100)]	2.45259e-05	0	1	2	3	Q0D3X9	Q0D3X9 [577-589]	0	2055.88	High	High	High	High	High	High	High	High	High	S6(Phospho): 100; S8(Phospho): 100	1	1.0617	1.06812	1.09848	1.09176	1.13366	1.3883	1.30621	1.42714	3	3	3	3	3	3	3	3	3	Unique	4.03384	High	0	2.224e-06
FALSE	High	[R].EEGEISESEAETK.[Y]	2xTMT6plex [N-Term; K13]; 1xPhospho [S6(100)]	Q0D3X9 1xPhospho [S582(100)]	9.1917e-06	0	1	2	5	Q0D3X9	Q0D3X9 [577-589]	0	1975.91	High	High	High	High	High	High	High	High	High	S6(Phospho): 100	1	1.11245	1.15585	1.12682	1.08171	1.08969	1.2472	1.24954	1.41748	4	4	4	4	4	4	4	4	4	Unique	4.37232	High	0	7.059e-07
FALSE	High	[R].DAYSDADDDDDDRPHAPPGPVDPSK.[S]	2xTMT6plex [N-Term; K25]; 1xPhospho [S4(100)]	Q655M5 1xPhospho [S67(100)]	1.32668e-10	0	1	1	24	Q655M5	Q655M5 [64-88]	0	3205.4	High	High	High	High	High	High	High	High	High	S4(Phospho): 100	1	1.02313	0.996591	1.11314	1.00631	0.964591	1.43755	1.33886	1.40783	12	12	12	12	12	12	12	12	12	Unique	7.35012	High	0	1.614e-12
FALSE	High	[R].SASPDDDLAAK.[E]	2xTMT6plex [N-Term; K11]; 1xPhospho [S3(100)]	Q0E4T3 1xPhospho [S368(100)]	0.000549901	0	1	1	7	Q0E4T3	Q0E4T3 [366-376]	0	1627.8	High	High	High	High	High	High	High	High	High	S3(Phospho): 99.55	1	1.00486	1.01471	1.02518	1.01235	1.00564	1.10988	1.23033	1.25462	5	5	5	5	5	5	5	5	5	Unique	3.775	High	0	8.386e-05
FALSE	High	[K].FEQSDPEVSSPTR.[K]	1xTMT6plex [N-Term]; 1xPhospho [S10(99.6)]	Q69VQ4 1xPhospho [S627(100)]	4.06971e-05	0	1	1	14	Q69VQ4	Q69VQ4 [618-630]	0	1787.81	High	High	High	High	High	High	High	High	High	T12(Phospho): 99.46	1	1.11651	1.07575	1.18253	1.01335	1.02421	1.4991	1.30429	1.4959	7	7	7	7	7	7	7	7	7	Unique	4.16866	High	0	4e-06
FALSE	High	[R].AVAVDSDQQGSPEPPDQEAKPK.[K]	3xTMT6plex [N-Term; K20; K22]; 1xPhospho [S11(100)]	Q10LX5 1xPhospho [S58(100)]	2.90788e-09	0	1	1	5	Q10LX5	Q10LX5 [48-69]	0	3060.55	High	High	High	High	High	High	High	High	High	S11(Phospho): 100	1	1.1297	0.786782	1.02518	0.858533	0.789655	1.02939	0.869204	1.00973	5	5	5	5	5	5	5	5	5	Unique	5.42349	High	0	5.902e-11
FALSE	High	[K].DMAQEGSSGLK.[S]	2xTMT6plex [N-Term; K11]; 1xPhospho [S7(100)]	Q6Z8I8 1xPhospho [S290(100)]	0.000405966	0	1	2	5	Q6Z8I8	Q6Z8I8 [284-294]	0	1660.8	High	High	High	High	High	High	High	High	High	S7(Phospho): 100	1	1.04546	0.97561	1.1063	1.03547	0.979251	1.03034	0.932593	0.922873	3	3	3	3	3	3	3	3	3	Unique	3.32021	High	0	8.016e-05
FALSE	High	[R].QMASQASQAASSTSNTR.[Q]	1xTMT6plex [N-Term]; 1xPhospho [S7(99.2)]	Q5JJI4 1xPhospho [S150(99.2)]	1.07116e-05	0	1	1	4	Q5JJI4	Q5JJI4 [144-160]	0	2034.91	High	High	High	High	High	High	High	High	High	S7(Phospho): 99.22	1	1.21598	0.949861	1.21282	1.09981	0.967523	1.47732	1.47813	1.75165	2	2	2	2	2	2	2	2	2	Unique	3.67759	High	0	8.443e-07
FALSE	High	[R].GVGMGVGDPSSPSAR.[A]	1xTMT6plex [N-Term]; 1xPhospho [S]	Q0DE33 1xPhospho [S16(99.1)]	0.00132742	0	1	1	1	Q0DE33	Q0DE33 [6-20]	0	1682.78	High	High	High	High	High	High	High	High	High	S11(Phospho): 99.12	1	0.99369	0.834466	0.774019	1.07467	0.836566	0.987721	0.96813	0.89392	1	1	1	1	1	1	1	1	1	Unique	3.25682	High	0	0.0002361
FALSE	High	[R].SQESDEEESDNFQK.[N]	2xTMT6plex [N-Term; K14]; 1xPhospho [S4(100)]	Q68Y36 1xPhospho [S60(100)]	2.98126e-05	0	1	1	8	Q68Y36	Q68Y36 [57-70]	0	2209.95	High	High	High	High	High	High	High	High	High	S4(Phospho): 100	1	1.04038	0.931741	1.32326	1.08674	1.19132	1.53603	1.32349	1.55501	4	4	4	4	4	4	4	4	4	Unique	4.25635	High	0	2.777e-06
FALSE	High	[K].QAEEDPMSDDENHEDSR.[R]	1xTMT6plex [N-Term]; 1xPhospho [S8(100)]	Q0DNZ7 1xPhospho [S512(100)]	5.46915e-08	0	1	2	3	Q0DNZ7	Q0DNZ7 [505-521]	0	2312.88	High	High	High	High	High	High	High	High	High	S8(Phospho): 100	1	1.15305	1.1673	1.11216	1.03245	0.980228	1.43092	1.33022	1.5538	3	3	3	3	3	3	3	3	3	Unique	5.1113	High	0	1.804e-09
FALSE	High	[R].MLAPVPAHSEVSPDNVSGR.[S]	1xTMT6plex [N-Term]; 1xOxidation [M1(100)]; 1xPhospho [S12(100)]	Q2R4J4 1xPhospho [S413(100)]	1.28122e-08	0	1	3	4	Q2R4J4	Q2R4J4 [402-420]	0	2288.09	High	High	High	High	High	High	High	High	High	M1(Oxidation): 100; S12(Phospho): 100	1	1.21902	1.0767	1.23335	1.13399	1.25778	1.47732	1.45796	1.62981	4	4	4	4	4	4	4	4	4	Unique	5.82115	High	0	3.317e-10
FALSE	High	[R].MLAPVPAHSEVSPDNVSGR.[S]	1xTMT6plex [N-Term]; 1xPhospho [S12(100)]	Q2R4J4 1xPhospho [S413(100)]	5.92637e-12	0	1	3	6	Q2R4J4	Q2R4J4 [402-420]	0	2272.1	High	High	High	High	High	High	High	High	High	S12(Phospho): 100	1	1.03023	0.950815	1.01834	1.05055	1.16201	1.07958	1.19768	1.20637	6	6	6	6	6	6	6	6	6	Unique	7.01963	High	0	4.297e-14
FALSE	High	[R].QQAVAISPTAK.[S]	2xTMT6plex [N-Term; K11]; 1xPhospho [S7(100)]	A0A0P0W1J8 1xPhospho [S1077(100)]	4.85387e-06	0	1	1	5	A0A0P0W1J8	A0A0P0W1J8 [1071-1081]	0	1651.92	High	High	High	High	High	High	High	High	High	S7(Phospho): 100	1	0.998765	1.12343	0.956773	0.881655	1.09848	0.90912	1.00367	0.813093	5	5	5	5	5	5	5	5	5	Unique	4.6498	High	0	4.627e-07
FALSE	High	[K].NNVLGASPSSK.[S]	2xTMT6plex [N-Term; K11]; 1xPhospho [S]		0.000175206	0	1	1	6	Q10QF7	Q10QF7 [333-343]	0	1611.85	High	High	High	High	High	High	High	High	High	S7(Phospho): 100	1	0.917565	0.978471	1.02127	0.896735	0.988046	1.01802	1.01231	1.05075	6	6	6	6	6	6	6	6	6	Unique	3.29105	High	0	2.201e-05
FALSE	High	[R].LHPYQESEDDQESSEEQPAQDR.[R]	1xTMT6plex [N-Term]; 3xPhospho [S7(100); S13(100); S14(100)]	Q69IM3 3xPhospho [S158(100); S164(100); S165(100)]	1.13061e-09	0	1	2	8	Q69IM3	Q69IM3 [152-173]	0	3086.15	High	High	High	High	High	High	High	High	High	S7(Phospho): 100; S13(Phospho): 100; S14(Phospho): 100	1	1.15305	1.10626	1.19621	1.07769	1.0633	1.65062	1.33598	1.76854	8	8	8	8	8	8	8	8	8	Unique	6.28235	High	0	1.962e-11
FALSE	High	[R].LHPYQESEDDQESSEEQPAQDR.[R]	1xTMT6plex [N-Term]; 2xPhospho [S7(100); S/Y]	Q69IM3 2xPhospho [S158(100); S164(99.3)]	8.89757e-12	0	1	2	8	Q69IM3	Q69IM3 [152-173]	0	3006.19	High	High	High	High	High	High	High	High	High	S7(Phospho): 100; S13(Phospho): 99.54	1	1.07591	1.0891	1.1278	1.00129	0.929409	1.67998	1.40417	1.70701	6	6	6	6	6	6	6	6	6	Unique	6.14893	High	0	6.912e-14
FALSE	High	[R].MVNETGEESE.[-]	1xTMT6plex [N-Term]; 1xPhospho [S9(100)]	Q0DAD7 1xPhospho [S162(100)]	2.29001e-05	0	1	1	5	Q0DAD7	Q0DAD7 [154-163]	0	1433.57	High	High	High	High	High	High	High	High	High	S9(Phospho): 100	1	1.14087	0.887872	1.12096	1.0043	0.892271	1.31917	1.1631	1.26548	5	5	5	5	5	5	5	5	5	Unique	3.68645	High	0	2.044e-06
FALSE	High	[K].QAEEDPMSDDENHEDSR.[R]	1xTMT6plex [N-Term]; 1xOxidation [M7(100)]; 1xPhospho [S8(100)]	Q0DNZ7 1xPhospho [S512(100)]	1.38722e-05	0	1	2	1	Q0DNZ7	Q0DNZ7 [505-521]	0	2328.88	High	High	High	High	High	High	High	High	High	M7(Oxidation): 100; S8(Phospho): 100	1	0.98963	1.01376	1.30274	0.815305	0.952864	1.71502	1.27451	2.04118	1	1	1	1	1	1	1	1	1	Unique	3.10405	High	0	1.142e-06
FALSE	High	[K].AHGTAVGLPSEDDMGNSEVGHNALGAGR.[I]	1xTMT6plex [N-Term]; 1xOxidation [M14(100)]; 1xPhospho [S17(100)]	Q5QMK7 1xPhospho [S81(98.6)]	2.19031e-10	0	1	1	3	Q5QMK7	Q5QMK7 [65-92]	0	3044.37	High	High	High	High	High	High	High	High	High	M14(Oxidation): 100; S17(Phospho): 100	1	0.986585	0.967981	0.997819	0.924883	0.861975	1.5796	1.61451	1.62257	3	3	3	3	3	3	3	3	3	Unique	5.84769	High	0	2.896e-12
FALSE	High	[R].ADIDEDSSAIENH.[-]	1xTMT6plex [N-Term]; 1xPhospho [S8(99.6)]	Q5JK43 1xPhospho [S565(99.4)]	6.27139e-05	0	1	1	5	Q5JK43	Q5JK43 [558-570]	0	1724.72	High	High	High	High	High	High	High	High	High	S8(Phospho): 99.65	1	1.00587	0.968935	1.06623	0.89774	0.922568	1.04833	0.953723	1.06884	3	3	3	3	3	3	3	3	3	Unique	3.45913	High	0	6.622e-06
FALSE	High	[R].SLSESSNNTLK.[R]	2xTMT6plex [N-Term; K11]; 1xPhospho [S3(100)]	Q2QYY8 1xPhospho [S289(100)]	1.88389e-05	0	1	4	22	Q2QYY8	Q2QYY8 [287-297]	0	1717.88	High	High	High	High	High	High	High	High	High	S3(Phospho): 100	1	1.0891	0.921251	1.67606	1.29584	1.48256	1.59759	1.72112	1.44885	13	13	13	13	13	13	13	13	13	Unique	4.20001	High	0	7.625e-06
FALSE	High	[R].SLSESSNNTLK.[R]	2xTMT6plex [N-Term; K11]; 2xPhospho [S3(99.5); S/T]	Q2QYY8 2xPhospho [S289(100); T295(98.5)]	0.000109072	0	1	4	20	Q2QYY8	Q2QYY8 [287-297]	0	1797.84	High	High	High	High	High	High	High	High	High	S3(Phospho): 100; S6(Phospho): 100	1	0.990645	0.884057	1.10337	0.958058	1.08284	1.43849	1.58666	1.39215	16	16	16	16	16	16	16	16	16	Unique	3.7099	High	0	3.363e-05
FALSE	High	[K].VMPDLPLEDGDSHHK.[-]	2xTMT6plex [N-Term; K15]; 1xPhospho [S12(100)]	Q6EQ14 1xPhospho [S508(100)]	0.000216237	0	1	1	11	Q6EQ14	Q6EQ14 [497-511]	0	2228.08	High	High	High	High	High	High	High	High	High	S12(Phospho): 100	1	0.97948	0.973703	0.859043	0.988218	0.912795	1.22068	1.28892	1.19431	11	11	11	11	11	11	11	11	11	Unique	4.04183	High	0	2.807e-05
FALSE	High	[R].HPHDVQSVPDSPMIDK.[N]	2xTMT6plex [N-Term; K16]; 1xOxidation [M13(100)]; 2xPhospho [S7(100); S11(100)]	Q5ZDH9 2xPhospho [S264(100); S268(100)]	0.000211736	0	1	1	2	Q5ZDH9	Q5ZDH9 [258-273]	0	2436.11	High	High	High	High	High	High	High	High	High	S7(Phospho): 100; S11(Phospho): 100; M13(Oxidation): 100	1	1.11143	0.945093	1.01346	0.941973	0.852202	1.41292	1.36287	1.75889	2	2	2	2	2	2	2	2	2	Unique	3.56759	High	0	2.739e-05
FALSE	High	[R].HPHDVQSVPDSPMIDK.[N]	2xTMT6plex [N-Term; K16]; 2xPhospho [S7(100); S11(100)]	Q5ZDH9 2xPhospho [S264(100); S268(100)]	6.34009e-08	0	1	1	7	Q5ZDH9	Q5ZDH9 [258-273]	0	2420.11	High	High	High	High	High	High	High	High	High	S7(Phospho): 100; S11(Phospho): 100	1	1.00587	0.986101	1.05548	0.984196	0.840475	1.55213	1.56457	1.73235	7	7	7	7	7	7	7	7	7	Unique	5.57631	High	0	2.142e-09
FALSE	High	[K].KDHGQDSEDDER.[R]	2xTMT6plex [N-Term; K1]; 1xPhospho [S7(100)]	Q6ZKL9 1xPhospho [S240(100)]	0.000221997	0	1	1	1	Q6ZKL9	Q6ZKL9 [234-245]	1	1968.87	High	High	High	High	High	High	High	High	High	S7(Phospho): 100	1	0.99775	0.897409	1.03887	1.16817	0.997819	1.60516	1.35999	1.64187	1	1	1	1	1	1	1	1	1	Unique	3.31474	High	0	2.903e-05
FALSE	High	[R].AQTIDELHSLQR.[K]	1xTMT6plex [N-Term]; 1xPhospho [S9(100)]	Q10NX2 1xPhospho [S44(100)]	0.000117421	0	1	1	3	Q10NX2	Q10NX2 [36-47]	0	1719.86	High	High	High	High	High	High	High	High	High	S9(Phospho): 100	1	1.23222	1.0891	1.12291	0.935942	1.04278	1.03981	1.14677	1.11107	3	3	3	3	3	3	3	3	3	Unique	3.2425	High	0	2.969e-05
FALSE	High	[K].AKSSDSIEPPSQPVETTDEAK.[D]	3xTMT6plex [N-Term; K2; K21]; 2xPhospho [S3(99.6); S6(100)]	Q5W645 2xPhospho [S149(99.6); S152(100)]	4.76791e-08	0	1	1	12	Q5W645	Q5W645 [147-167]	1	3063.48	High	High	High	High	High	High	High	High	High	S3(Phospho): 50; S4(Phospho): 50; S6(Phospho): 100	1	0.990645	0.930788	1.05548	0.992239	0.980228	1.49058	1.3331	1.42955	8	8	8	8	8	8	8	8	8	Unique	5.98229	High	0	1.539e-09
FALSE	High	[K].AKSSDSIEPPSQPVETTDEAK.[D]	3xTMT6plex [N-Term; K2; K21]; 1xPhospho [S3(99.3)]	Q5W645 1xPhospho [S149(99.3)]	7.26088e-07	0	1	1	11	Q5W645	Q5W645 [147-167]	1	2983.51	High	High	High	High	High	High	High	High	High	S3(Phospho): 99.34	1	1.10433	1.04618	1.09946	1.02742	0.928431	1.39209	1.21785	1.50917	5	5	5	5	5	5	5	5	5	Unique	5.11357	High	0	3.672e-08
FALSE	High	[R].DTSPILDTMESGR.[R]	1xTMT6plex [N-Term]; 1xPhospho [S11(100)]	Q6YZK2 1xPhospho [S306(100)]	0.000430042	0	1	2	7	Q6YZK2	Q6YZK2 [296-308]	0	1730.79	High	High	High	High	High	High	High	High	High	S11(Phospho): 100	1	1.2038	1.05953	1.06916	1.08573	1.02909	1.21311	1.22361	1.25462	5	5	5	5	5	5	5	5	5	Unique	3.24311	High	0	8.221e-05
FALSE	High	[R].GGGGGGGGGSSASPK.[V]	2xTMT6plex [N-Term; K15]; 1xPhospho [S13(99.6)]	Q5YLY5 1xPhospho [S174(99.6)]	8.08214e-08	0	1	1	3	Q5YLY5	Q5YLY5 [162-176]	0	1627.78	High	High	High	High	High	High	High	High	High	S13(Phospho): 100	1	1.18756	1.06621	1.10239	0.974143	0.986092	1.16955	1.19383	1.14484	3	3	3	3	3	3	3	3	3	Unique	5.10642	High	0	2.83e-09
FALSE	High	[R].MSHASSVNDSDCISEPIR.[R]	1xTMT6plex [N-Term]; 1xCarbamidomethyl [C12]; 3xPhospho [S2(100); S5(100); S6(100)]	A3C592 3xPhospho [S242(100); S245(100); S246(100)]	6.16217e-10	0	1	1	1	A3C592	A3C592 [241-258]	0	2473.94	High	High	High	High	High	High	High	High	High	S2(Phospho): 100; S5(Phospho): 100; S6(Phospho): 100	1	1.11549	1.06907	0.99391	1.01637	0.979251	1.2633	1.14677	1.34148	1	1	1	1	1	1	1	1	1	Unique	7.21056	High	0	9.678e-12
FALSE	High	[R].MSHASSVNDSDCISEPIR.[R]	1xTMT6plex [N-Term]; 1xCarbamidomethyl [C12]; 1xOxidation [M1(100)]; 3xPhospho [S2(100); S5(100); S6(100)]	A3C592 3xPhospho [S242(100); S245(100); S246(100)]	0.000684619	0	1	1	2	A3C592	A3C592 [241-258]	0	2489.93	High	High	High	High	High	High	High	High	High	M1(Oxidation): 100; S2(Phospho): 100; S5(Phospho): 100; S6(Phospho): 100	1	1.04952	0.803949	0.906931	0.839432	0.944068	1.25383	1.0392	1.32821	2	2	2	2	2	2	2	2	2	Unique	3.24793	High	0	0.0001084
FALSE	High	[K].ASGTLKTPENSPKASDD.[-]	3xTMT6plex [N-Term; K6; K13]; 3xPhospho [T7(99.8); S11(100); S15(100)]	Q5W645 3xPhospho [T462(100); S466(100); S470(100)]	0.000213975	0	1	1	10	Q5W645	Q5W645 [456-472]	2	2645.21	High	High	High	High	High	High	High	High	High	T7(Phospho): 99.96; S11(Phospho): 100; S15(Phospho): 100	1	1.00587	1.00231	1.1493	0.951021	1.13366	1.28697	1.1996	1.3644	7	7	7	7	7	7	7	7	7	Unique	4.2865	High	0	3.029e-05
FALSE	High	[R].STSTPFMNTTDGK.[Q]	2xTMT6plex [N-Term; K13]; 1xOxidation [M7(100)]; 1xPhospho [S3(96.8)]		0.000414562	0	1	4	15	P16081	P16081 [530-542]	0	1940.91	High	High	High	High	High	High	High	High	High	S3(Phospho): 98.4; M7(Oxidation): 100	1	0.948015	0.878335	0.828747	0.876628	0.903022	0.942265	0.887452	0.959064	3	3	3	3	3	3	3	3	3	Unique	3.72866	High	0	6.029e-05
FALSE	High	[R].STSTPFMNTTDGK.[Q]	2xTMT6plex [N-Term; K13]; 1xPhospho [S3(98.9)]	P16081 1xPhospho [S532(99.1)]	1.61945e-06	0	1	4	56	P16081	P16081 [530-542]	0	1924.91	High	High	High	High	High	High	High	High	High	S3(Phospho): 99.43	1	0.990645	0.850679	0.736881	0.735885	0.692903	0.770858	0.656945	0.804648	17	17	17	17	17	17	17	17	17	Unique	5.21101	High	0	9.327e-08
FALSE	High	[R].SGSLIDDEADEDDR.[G]	1xTMT6plex [N-Term]; 1xPhospho [S3(100)]	Q0DJC4 1xPhospho [S129(100)]	6.0017e-10	0	1	1	14	Q0DJC4	Q0DJC4 [127-140]	0	1845.76	High	High	High	High	High	High	High	High	High	S3(Phospho): 100	1	0.99775	0.615121	0.69388	0.716785	0.684107	0.699833	0.791408	1.01938	10	10	10	10	10	10	10	10	10	Unique	5.74661	High	0	9.395e-12
FALSE	High	[R].EQSVLEKSPASCPTN.[-]	2xTMT6plex [N-Term; K7]; 1xCarbamidomethyl [C12]; 1xPhospho [S8(100)]	Q7XVN8 1xPhospho [S642(100)]	0.000847276	0	1	2	3	Q7XVN8	Q7XVN8 [635-649]	1	2185.06	High	High	High	High	High	High	High	High	High	S8(Phospho): 100	1	1.03328	0.962259	1.0848	1.00229	1.14637	1.42524	1.35039	1.49469	3	3	3	3	3	3	3	3	3	Unique	2.90577	High	0	0.0001409
FALSE	High	[R].GGSSHSSPDQPSSPQTR.[R]	1xTMT6plex [N-Term]; 3xPhospho [S6(100); S7(100); S/T]	A0A0P0VUJ4 3xPhospho [S785(100); S786(100); S/T]	9.1181e-05	0	1	1	1	A0A0P0VUJ4	A0A0P0VUJ4 [780-796]	0	2180.82	High	High	High	High	High	High	High	High	High	S6(Phospho): 100; S7(Phospho): 100; S12(Phospho): 50; S13(Phospho): 50	1	0.97339	0.85354	1.74936	1.53812	1.15125	2.26144	1.8066	2.18112	1	1	1	1	1	1	1	1	1	Unique	4.19924	High	0	1.028e-05
FALSE	High	[R].SNYSGSLSSSVPGASGSAR.[A]	1xTMT6plex [N-Term]; 1xPhospho [S/Y]	Q7X8W5 1xPhospho [S95(99.3)]	2.38824e-08	0	1	1	18	Q7X8W5	Q7X8W5 [92-110]	0	2079.95	High	High	High	High	High	High	High	High	High	S4(Phospho): 99.44	1	1.01907	1.07575	0.997819	0.928904	0.919636	1.06443	0.971972	1.28237	5	5	5	5	5	5	5	5	5	Unique	5.53258	High	0	4.33e-09
FALSE	High	[K].GEASGGGGGK.[G]	2xTMT6plex [N-Term; K10]; 1xPhospho [S4(100)]	Q6Z703 1xPhospho [S57(100)]	0.00018761	0	1	1	3	Q6Z703	Q6Z703 [54-63]	0	1314.65	High	High	High	High	High	High	High	High	High	S4(Phospho): 100	1	0.994705	0.905992	1.12194	1.09478	1.01346	1.06916	1.21208	1.11589	3	3	3	3	3	3	3	3	3	Unique	3.66463	High	0	2.374e-05
FALSE	High	[K].ASSEVSESQR.[V]	1xTMT6plex [N-Term]; 1xPhospho [S8(100)]	Q2QXY9 1xPhospho [S628(100)]	0.000558587	0	1	2	3	Q2QXY9	Q2QXY9 [621-630]	0	1388.63	High	High	High	High	High	High	High	High	High	S8(Phospho): 100	1	1.21293	0.842096	1.17764	1.01938	0.956773	1.41671	1.34943	1.45247	3	3	3	3	3	3	3	3	3	Unique	2.86354	High	0	8.557e-05
FALSE	High	[R].LAGGAAAAIQPNSPR.[F]	1xTMT6plex [N-Term]; 1xPhospho [S13(100)]	Q60EJ0 1xPhospho [S38(100)]	3.18083e-09	0	1	1	11	Q60EJ0	Q60EJ0 [26-40]	0	1702.88	High	High	High	High	High	High	High	High	High	S13(Phospho): 100	1	1.11143	0.970842	1.08871	1.03748	1.07698	1.15061	1.23705	1.33063	11	11	11	11	11	11	11	11	11	Unique	6.28106	High	0	1.209e-10
FALSE	High	[R].HLQPTSPTAFK.[Q]	2xTMT6plex [N-Term; K11]; 1xPhospho [S6(99.6)]	Q2QS13 1xPhospho [S393(100)]	4.89475e-05	0	1	1	7	Q2QS13	Q2QS13 [388-398]	0	1764.94	High	High	High	High	High	High	High	High	High	S6(Phospho): 100	1	1.28398	1.23692	0.754473	0.663503	0.631333	0.657218	0.615646	0.574232	7	7	7	7	7	7	7	7	7	Unique	4.2325	High	0	4.957e-06
FALSE	High	[R].LWSGGAYESDTEDPDNMK.[T]	2xTMT6plex [N-Term; K18]; 1xPhospho [S9(100)]		5.55643e-08	0	1	1	12	Q6ZB59	Q6ZB59 [421-438]	0	2553.13	High	High	High	High	High	High	High	High	High	S9(Phospho): 100	1	1.19568	1.00327	1.05353	0.948005	0.976319	0.856088	1.00367	1.00852	6	6	6	6	6	6	6	6	6	Unique	5.20182	High	0	1.84e-09
FALSE	High	[K].QVGGGDASAGEEAQEYK.[V]	2xTMT6plex [N-Term; K17]; 1xPhospho [S8(100)]	Q7XUV4 1xPhospho [S83(100)]	5.47791e-09	0	1	1	9	Q7XUV4	Q7XUV4 [76-92]	0	2234.04	High	High	High	High	High	High	High	High	High	S8(Phospho): 100	1	1.14594	1.04523	1.18155	1.03245	0.924522	0.773699	0.81734	0.836014	9	9	9	9	9	9	9	9	9	Unique	6.06404	High	0	1.23e-10
FALSE	High	[R].VSEGETTPSNSFK.[R]	2xTMT6plex [N-Term; K13]; 1xPhospho [S11(100)]	Q7G8Y3 1xPhospho [S1086(100)]	0.000395469	0	1	1	3	Q7G8Y3	Q7G8Y3 [1076-1088]	0	1920.94	High	High	High	High	High	High	High	High	High	S11(Phospho): 100	1	1.23729	0.767709	1.10337	0.812289	0.834611	0.778434	0.823102	0.838427	3	3	3	3	3	3	3	3	3	Unique	3.4822	High	6.595e-05	0.0004196
FALSE	High	[K].TDSDHEDELDEYQDQQSIR.[D]	1xTMT6plex [N-Term]; 1xPhospho [S3(100)]	Q6Z9D2 1xPhospho [S773(100)]	3.52195e-10	0	1	1	5	Q6Z9D2	Q6Z9D2 [771-789]	0	2632.09	High	High	High	High	High	High	High	High	High	S3(Phospho): 99.54	1	1.07895	1.04046	1.00564	1.02039	0.998797	1.36179	1.21304	1.44523	3	3	3	3	3	3	3	3	3	Unique	5.65933	High	0	5.044e-12
FALSE	High	[K].KAAAGSDEDHSNSPTR.[S]	2xTMT6plex [N-Term; K1]; 3xPhospho [S6(100); S11(100); S13(100)]	Q6K2P9 3xPhospho [S210(100); S215(100); S217(100)]	0.000804414	0	1	2	1	Q6K2P9	Q6K2P9 [205-220]	1	2340.97	High	High	High	High	High	High	High	High	High	S6(Phospho): 100; S11(Phospho): 100; S13(Phospho): 100	1	1.20887	1.13583	1.20696	1.00933	1.25973	2.06541	1.58762	2.02549	1	1	1	1	1	1	1	1	1	Unique	3.30201	High	0	0.0001306
FALSE	High	[R].ADASPSDGSGAR.[Y]	1xTMT6plex [N-Term]; 1xPhospho [S4(100)]	A0A0P0VVK9 1xPhospho [S166(100)]	0.000203013	0	1	1	2	A0A0P0VVK9	A0A0P0VVK9 [163-174]	0	1399.61	High	High	High	High	High	High	High	High	High	S4(Phospho): 100	1	0.598853	0.521661	0.628401	0.53985	0.520899	0.523691	0.462935	0.513913	2	2	2	2	2	2	2	2	2	Unique	3.55018	High	0	3.382e-05
FALSE	High	[R].ELSPETDDGDNKLPPETGNR.[A]	2xTMT6plex [N-Term; K12]; 1xPhospho [S3(100)]	Q0JBZ3 1xPhospho [S418(100)]	8.29825e-08	0	1	2	40	Q0JBZ3	Q0JBZ3 [416-435]	1	2722.3	High	High	High	High	High	High	High	High	High	S3(Phospho): 100	1	1.06779	1.08814	1.13953	1.06663	1.07112	1.35137	1.17463	1.27875	40	40	40	40	40	40	40	40	40	Unique	6.04566	High	0	4.837e-09
FALSE	High	[R].SSCGSNTPSSSDIEADNAPENQEK.[A]	2xTMT6plex [N-Term; K24]; 1xCarbamidomethyl [C3]; 2xPhospho [T7(99.8); S9(96.8)]	Q0J7W9 2xPhospho [T548(100); S]	8.22753e-06	0	1	2	7	Q0J7W9	Q0J7W9 [542-565]	0	3142.3	High	High	High	High	High	High	High	High	High	T7(Phospho): 99.98; S10(Phospho): 49.73; S11(Phospho): 49.73	1	1.02922	1.24455	1.00271	0.973138	0.971432	1.35989	1.24474	1.58276	7	7	7	7	7	7	7	7	7	Unique	3.48976	High	0	0.0001163
FALSE	High	[R].ASPPPPPGSPTAASAAAVSPIHR.[S]	1xTMT6plex [N-Term]; 2xPhospho [S9(100); S19(100)]	Q9SNN8 2xPhospho [S79(100); S89(100)]	2.16834e-07	0	1	1	4	Q9SNN8	Q9SNN8 [71-93]	0	2525.22	High	High	High	High	High	High	High	High	High	S9(Phospho): 100; S19(Phospho): 99.99	1	1.07591	1.10912	1.01443	1.14203	1.01932	1.43755	1.43875	1.45971	4	4	4	4	4	4	4	4	4	Unique	5.37706	High	0	1.029e-08
FALSE	High	[R].ACSVGVVGGGGGAGSPPGSPGR.[S]	1xTMT6plex [N-Term]; 1xCarbamidomethyl [C2]; 3xPhospho [S3(100); S15(100); S19(100)]	Q18PR9 3xPhospho [S47(100); S59(100); S63(100)]	2.38442e-07	0	1	1	6	Q18PR9	Q18PR9 [45-66]	0	2308.94	High	High	High	High	High	High	High	High	High	S3(Phospho): 100; S15(Phospho): 100; S19(Phospho): 100	1	1.08403	0.988008	1.04864	1.03647	0.949932	1.13166	1.06129	1.12192	6	6	6	6	6	6	6	6	6	Unique	6.23256	High	0	1.004e-08
FALSE	High	[R].ACSVGVVGGGGGAGSPPGSPGR.[S]	1xTMT6plex [N-Term]; 1xCarbamidomethyl [C2]; 2xPhospho [S15(100); S19(100)]	Q18PR9 2xPhospho [S59(100); S63(100)]	1.8326e-14	0	1	1	13	Q18PR9	Q18PR9 [45-66]	0	2228.97	High	High	High	High	High	High	High	High	High	S15(Phospho): 100; S19(Phospho): 100	1	1.04749	0.943185	1.05743	0.973138	1.00564	1.32012	1.19672	1.38974	13	13	13	13	13	13	13	13	13	Unique	8.82957	High	0	5.21e-17
FALSE	High	[R].RSGGGGGGGYGQR.[G]	1xTMT6plex [N-Term]; 1xPhospho [S2(100)]	Q2QLR2 1xPhospho [S89(100)]	4.65321e-06	0	1	1	1	Q2QLR2	Q2QLR2 [88-100]	1	1474.67	High	High	High	High	High	High	High	High	High	S2(Phospho): 100	1	0.842454	0.728608	0.939182	0.92991	0.741768	0.882604	0.826944	0.951825	1	1	1	1	1	1	1	1	1	Unique	3.7173	High	0	3.199e-07
FALSE	High	[K].AEVSEQLATPKTPK.[S]	3xTMT6plex [N-Term; K11; K14]; 2xPhospho [T9(100); T12(100)]	Q6AT30 2xPhospho [T148(100); T151(100)]	1.85084e-07	0	1	1	6	Q6AT30	Q6AT30 [140-153]	1	2346.23	High	High	High	High	High	High	High	High	High	T9(Phospho): 100; T12(Phospho): 100	1	1.1703	1.10722	1.04278	0.98118	1.02127	1.21027	1.27451	1.14967	6	6	6	6	6	6	6	6	6	Unique	5.55112	High	0	7.441e-09
FALSE	High	[K].EATTTAASDDGTLVGSK.[K]	2xTMT6plex [N-Term; K17]; 1xPhospho [S8(99.4)]	Q6K8A9 1xPhospho [S439(100)]	8.35881e-06	0	1	2	5	Q6K8A9	Q6K8A9 [432-448]	0	2162.06	High	High	High	High	High	High	High	High	High	S8(Phospho): 99.99	1	1.00689	0.895502	0.903999	0.874618	0.852202	0.851353	0.865362	0.955445	5	5	5	5	5	5	5	5	5	Unique	3.80574	High	0	1.834e-06
FALSE	High	[R].AESSPSPVQVPSTPK.[A]	2xTMT6plex [N-Term; K15]; 2xPhospho [S6(99.1); T13(100)]	A0A0P0UYD8 2xPhospho [S375(99.6); T382(100)]	0.0001671	0	1	1	7	A0A0P0UYD8	A0A0P0UYD8 [370-384]	0	2129.03	High	High	High	High	High	High	High	High	High	S6(Phospho): 98.86; T13(Phospho): 100	1	1.07388	1.00613	1.08969	1.00732	1.12291	1.25477	1.13717	1.34269	6	6	6	6	6	6	6	6	6	Unique	3.7197	High	0	2.077e-05
FALSE	High	[R].AESSPSPVQVPSTPK.[A]	2xTMT6plex [N-Term; K15]; 1xPhospho [S/T]	A0A0P0UYD8 1xPhospho [S375(98.8)]	0.000740218	0	1	1	4	A0A0P0UYD8	A0A0P0UYD8 [370-384]	0	2049.07	High	High	High	High	High	High	High	High	High	S6(Phospho): 98.75	1	0.87392	1.00327	0.98316	1.16716	1.22846	1.3741	1.36575	1.63704	3	3	3	3	3	3	3	3	3	Unique	3.933	High	0	0.0001186
FALSE	High	[R].ALQESLNADSPPR.[Q]	1xTMT6plex [N-Term]; 1xPhospho [S10(100)]	Q2QMP4 1xPhospho [S87(100)]	9.99773e-09	0	1	2	22	Q2QMP4	Q2QMP4 [78-90]	0	1706.83	High	High	High	High	High	High	High	High	High	S10(Phospho): 100	1	0.998765	1.03951	1.11216	1.13801	1.0975	1.11935	1.15638	1.22446	22	22	22	22	22	22	22	22	22	Unique	5.613	High	0	2.485e-10
FALSE	High	[K].GDGDGAITPEDGSAVTENPK.[S]	2xTMT6plex [N-Term; K20]; 1xPhospho [T8(100)]	Q0E2A9 1xPhospho [T616(100)]	1.87347e-08	0	1	2	14	Q0E2A9	Q0E2A9 [609-628]	0	2468.16	High	High	High	High	High	High	High	High	High	T8(Phospho): 100	1	0.96933	0.889779	0.948955	0.86557	0.800406	1.06916	1.00175	1.10745	13	13	13	13	13	13	13	13	13	Unique	5.558	High	0	5.154e-10
FALSE	High	[K].RESFENPLAGR.[G]	1xTMT6plex [N-Term]; 1xPhospho [S3(100)]	Q10NL9 1xPhospho [S956(100)]	2.34317e-06	0	1	2	10	Q10NL9	Q10NL9 [954-964]	1	1584.77	High	High	High	High	High	High	High	High	High	S3(Phospho): 100	1	1.13275	1.00041	1.06623	0.873613	0.92159	1.1686	0.987339	1.14726	10	10	10	10	10	10	10	10	10	Unique	4.83079	High	0	1.996e-07
FALSE	High	[R].STPDDTEPNSEENMYK.[E]	2xTMT6plex [N-Term; K16]; 1xPhospho [S1(100)]	A0A0P0W719 1xPhospho [S160(100)]	3.12622e-05	0	1	2	10	A0A0P0W719	A0A0P0W719 [160-175]	0	2395.04	High	High	High	High	High	High	High	High	High	S1(Phospho): 100	1	1.1094	1.03092	1.11803	0.974143	0.925499	1.33622	1.24666	1.44282	5	5	5	5	5	5	5	5	5	Unique	3.86309	High	0	3.7e-06
FALSE	High	[K].AVNNNEDILVSR.[E]	1xTMT6plex [N-Term]; 1xPhospho [S11(100)]	Q0JBZ3 1xPhospho [S414(100)]	7.76354e-06	0	1	2	6	Q0JBZ3	Q0JBZ3 [404-415]	0	1652.82	High	High	High	High	High	High	High	High	High	S11(Phospho): 100	1	1.0688	0.996591	1.08187	0.97917	0.929409	1.39588	1.27355	1.43196	6	6	6	6	6	6	6	6	6	Unique	3.68795	High	0	5.818e-07
FALSE	High	[K].SPPREPEPEPVKEEEPEPDMNEIK.[A]	3xTMT6plex [N-Term; K12; K24]; 1xPhospho [S1(100)]	Q10NB4 1xPhospho [S363(100)]	5.88854e-08	0	1	2	5	Q10NB4	Q10NB4 [363-386]	2	3569.77	High	High	High	High	High	High	High	High	High	S1(Phospho): 100	1	1.16218	1.03665	1.13366	0.943984	1.02714	1.2614	1.22169	1.38371	5	5	5	5	5	5	5	5	5	Unique	5.79321	High	0	1.957e-09
FALSE	High	[K].CESISSDDISTNK.[K]	2xTMT6plex [N-Term; K13]; 1xCarbamidomethyl [C1]; 2xPhospho [S5(100); S6(100)]	Q10KI0 2xPhospho [S291(100); S292(100)]	0.0016369	0	1	1	2	Q10KI0	Q10KI0 [287-299]	0	2073.89	High	High	High	High	High	High	High	High	High	S5(Phospho): 99.99; S6(Phospho): 100	1	1.13173	0.972749	1.15907	1.01134	1.09457	1.42808	1.384	1.4018	2	2	2	2	2	2	2	2	2	Unique	2.82857	High	0	0.000304
FALSE	High	[R].ANQSVGSDNSPLLVETDNR.[T]	1xTMT6plex [N-Term]; 1xPhospho [S10(100)]	Q10RH2 1xPhospho [S417(100)]	8.0396e-08	0	1	1	2	Q10RH2	Q10RH2 [408-426]	0	2325.09	High	High	High	High	High	High	High	High	High	S10(Phospho): 100	1	1.10737	0.967981	0.905954	1.02642	1.01639	1.22636	1.08338	1.33183	2	2	2	2	2	2	2	2	2	Unique	3.77961	High	0	2.818e-09
FALSE	High	[R].GENPKEEYSSGVQEAER.[N]	2xTMT6plex [N-Term; K5]; 2xPhospho [S9(100); S10(100)]	A0A0N7KDZ0 2xPhospho [S37(100); S38(100)]	7.11729e-05	0	1	1	5	A0A0N7KDZ0	A0A0N7KDZ0 [29-45]	1	2527.12	High	High	High	High	High	High	High	High	High	S9(Phospho): 100; S10(Phospho): 100	1	1.03632	1.10817	1.19914	1.12092	1.06916	1.23584	1.09683	1.21602	5	5	5	5	5	5	5	5	5	Unique	3.57106	High	0	7.699e-06
FALSE	High	[K].TDSEVTSLAPSSPPRSPTSR.[G]	1xTMT6plex [N-Term]; 2xPhospho [S/T]	A0A0P0WGP3 2xPhospho [T63(97.1); S/T]	1.39924e-07	0	1	2	16	A0A0P0WGP3	A0A0P0WGP3 [46-65]	1	2461.12	High	High	High	High	High	High	High	High	High	S12(Phospho): 99.04; S16(Phospho): 99.99	1	1.21598	1.12248	0.83852	0.731864	0.738836	1.01708	1.06706	1.13399	15	15	15	15	15	15	15	15	15	Unique	5.20717	High	0	5.388e-09
FALSE	High	[R].DTSQTVTANPTSGSPLGNK.[G]	2xTMT6plex [N-Term; K19]; 1xPhospho [S14(100)]	Q0J0H3 1xPhospho [S368(100)]	5.35236e-11	0	1	1	8	Q0J0H3	Q0J0H3 [355-373]	0	2413.2	High	High	High	High	High	High	High	High	High	S14(Phospho): 100	1	0.996735	0.995637	1.14637	0.953032	1.03691	1.35042	1.32734	1.48022	8	8	8	8	8	8	8	8	8	Unique	7.05687	High	0	5.597e-13
FALSE	High	[K].QSGSNDSGSTSAGQSPR.[L]	1xTMT6plex [N-Term]; 1xPhospho [S15(100)]	A0A0N7KN54 1xPhospho [S232(100)]	0.000224344	0	1	1	1	A0A0N7KN54	A0A0N7KN54 [218-234]	0	1931.83	High	High	High	High	High	High	High	High	High	S15(Phospho): 100	1	0.901325	1.09387	1.44933	1.13499	1.60081	1.37978	1.39073	1.40421	1	1	1	1	1	1	1	1	1	Unique	3.47034	High	0	2.94e-05
FALSE	High	[K].SEYPSSELAR.[G]	1xTMT6plex [N-Term]; 2xPhospho [S5(100); S6(100)]	Q0IXM4 2xPhospho [S218(100); S219(100)]	0.000414562	0	1	1	6	Q0IXM4	Q0IXM4 [214-223]	0	1527.63	High	High	High	High	High	High	High	High	High	S5(Phospho): 100; S6(Phospho): 100	1	1.10027	1.02139	1.07307	1.00732	1.03496	1.77657	1.50214	1.7987	6	6	6	6	6	6	6	6	6	Unique	3.25468	High	0	6.001e-05
FALSE	High	[R].QALGDGDISPPR.[K]	1xTMT6plex [N-Term]; 1xPhospho [S9(100)]	Q6ZKE8 1xPhospho [S326(100)]	0.000291741	0	1	2	9	Q6ZKE8	Q6ZKE8 [318-329]	0	1534.75	High	High	High	High	High	High	High	High	High	S9(Phospho): 100	1	1.10331	0.972749	1.08089	1.01335	0.990978	1.30023	1.2092	1.38491	9	9	9	9	9	9	9	9	9	Unique	3.28719	High	0	3.995e-05
FALSE	High	[R].LSSPSAPSSPSSAK.[A]	2xTMT6plex [N-Term; K14]; 2xPhospho [S5(98.4); S9(100)]	Q0J0L4 2xPhospho [S32(99); S]	0.000775683	0	1	1	9	Q0J0L4	Q0J0L4 [28-41]	0	1920.91	High	High	High	High	High	High	High	High	High	S8(Phospho): 99.16; S9(Phospho): 99.99	1	1.14493	1.00327	1.12975	0.982186	1.03887	1.08337	1.07186	1.02783	5	5	5	5	5	5	5	5	5	Unique	3.27839	High	0	0.0001258
FALSE	High	[R].ELSPETDDGDNKLPPETGNR.[A]	2xTMT6plex [N-Term; K12]; 2xPhospho [S3(100); T6(100)]	Q0JBZ3 2xPhospho [S418(100); T421(100)]	1.3628e-07	0	1	2	44	Q0JBZ3	Q0JBZ3 [416-435]	1	2802.26	High	High	High	High	High	High	High	High	High	S3(Phospho): 100; T6(Phospho): 100	1	1.03023	0.986101	1.11705	1.10885	1.05157	1.42808	1.28796	1.38974	44	44	44	44	44	44	44	44	44	Unique	5.90472	High	0	1.274e-08
FALSE	High	[K].QSGSNDSGSTSAGQSPR.[L]	1xTMT6plex [N-Term]; 2xPhospho [S11(99.9); S15(100)]	A0A0N7KN54 2xPhospho [S228(99.9); S232(100)]	7.13496e-06	0	1	1	2	A0A0N7KN54	A0A0N7KN54 [218-234]	0	2011.8	High	High	High	High	High	High	High	High	High	S11(Phospho): 98.92; S15(Phospho): 100	1	1.12158	0.995637	1.18253	1.16716	0.996842	1.65725	1.40225	1.45971	2	2	2	2	2	2	2	2	2	Unique	3.66234	High	0	5.255e-07
FALSE	High	[R].DGEASDDEEEYDTK.[E]	2xTMT6plex [N-Term; K14]; 1xPhospho [S5(100)]	Q8S7Q0 1xPhospho [S689(100)]	1.48049e-06	0	1	1	17	Q8S7Q0	Q8S7Q0 [685-698]	0	2140.88	High	High	High	High	High	High	High	High	High	S5(Phospho): 100	1	0.655693	0.45395	0.385055	0.471489	0.447602	0.433726	0.585872	0.861348	17	17	17	17	17	17	17	17	17	Unique	4.89013	High	0	9.241e-08
FALSE	High	[R].VEEEDDTDEDDYDSDGESR.[A]	1xTMT6plex [N-Term]; 2xPhospho [T7(100); S14(100)]	A0A0P0VL78 2xPhospho [T93(100); S100(100)]	3.05071e-06	0	1	1	4	A0A0P0VL78	A0A0P0VL78 [87-105]	0	2608.88	High	High	High	High	High	High	High	High	High	T7(Phospho): 100; S14(Phospho): 100	1	0.978465	0.933649	1.05353	0.992239	0.880544	1.61179	1.39169	1.55501	3	3	3	3	3	3	3	3	3	Unique	4.3354	High	0	1.954e-07
FALSE	High	[K].ASAWQSSGSSPVAGSSK.[A]	2xTMT6plex [N-Term; K17]; 1xPhospho [S]		5.46915e-08	0	1	1	6	A0A0P0XW57	A0A0P0XW57 [290-306]	0	2132.04	High	High	High	High	High	High	High	High	High	S10(Phospho): 99.41	1	1.2241	1.21021	1.05059	1.13399	0.956773	1.11841	1.09779	1.17742	3	3	3	3	3	3	3	3	3	Unique	4.83618	High	0	1.801e-09
FALSE	High	[K].QAGGPATSGDSDKSKSEVNDEDEGSGDE.[-]	3xTMT6plex [N-Term; K13; K15]; 3xPhospho [S11(97.8); S14(97.9); S25(100)]	Q69MM2 3xPhospho [S110(97.8); S113(97.9); S124(100)]	4.39797e-07	0	1	1	4	Q69MM2	Q69MM2 [100-127]	2	3695.51	High	High	High	High	High	High	High	High	High	S11(Phospho): 97.84; S14(Phospho): 97.88; S25(Phospho): 100	1	1.12158	1.24359	1.19719	0.879644	1.05255	1.09094	1.10163	1.20758	3	3	3	3	3	3	3	3	3	Unique	5.79926	High	0	2.049e-08
FALSE	High	[K].TVNQPTSHDNK.[M]	2xTMT6plex [N-Term; K11]; 1xPhospho [S7(100)]	Q10K10 1xPhospho [S380(100)]	0.00132063	0	1	1	2	Q10K10	Q10K10 [374-384]	0	1778.88	High	High	High	High	High	High	High	High	High	S7(Phospho): 99.55	1	1.22613	0.813485	1.90866	1.38029	1.07307	1.12882	0.929712	1.11107	2	2	2	2	2	2	2	2	2	Unique	2.98644	High	0	0.0002352
FALSE	High	[K].EDDEQDGSEAGSNAGPR.[G]	1xTMT6plex [N-Term]; 1xPhospho [S8(100)]	A0A0P0W2C7 1xPhospho [S56(100)]	1.35563e-07	0	1	1	1	A0A0P0W2C7	A0A0P0W2C7 [49-65]	0	2042.81	High	High	High	High	High	High	High	High	High	S8(Phospho): 100	1	1.62908	0.992776	1.35258	1.02039	0.920613	1.48679	1.26779	1.49349	1	1	1	1	1	1	1	1	1	Unique	4.58252	High	0	5.179e-09
FALSE	High	[K].AEFPSSHEQPAADNVASSPPPK.[A]	2xTMT6plex [N-Term; K22]; 1xPhospho [S18(99.6)]	Q5ZDX7 1xPhospho [S275(98.9)]	5.53604e-09	0	1	1	5	Q5ZDX7	Q5ZDX7 [258-279]	0	2801.35	High	High	High	High	High	High	High	High	High	S18(Phospho): 99.16	1	1.08707	0.894548	0.971432	0.905782	0.855134	1.15345	1.06417	1.2691	4	4	4	4	4	4	4	4	4	Unique	5.93562	High	0	2.143e-10
FALSE	High	[R].ASGSPPVPVMHSPPRPVTVK.[D]	2xTMT6plex [N-Term; K20]; 1xOxidation [M10(100)]; 2xPhospho [S4(100); S12(100)]	Q6K8D9 2xPhospho [S239(98); S247(100)]	7.09741e-06	0	1	2	8	Q6K8D9	Q6K8D9 [236-255]	0	2674.36	High	High	High	High	High	High	High	High	High	S4(Phospho): 98.64; M10(Oxidation): 100; S12(Phospho): 100	1	1.00689	0.956537	1.03789	1.03547	1.00368	1.09568	1.05745	1.00732	8	8	8	8	8	8	8	8	8	Unique	5.2588	High	0	5.224e-07
FALSE	High	[R].ASGSPPVPVMHSPPRPVTVK.[D]	2xTMT6plex [N-Term; K20]; 2xPhospho [S4(100); S12(100)]	Q6K8D9 2xPhospho [S239(99); S247(100)]	4.42124e-07	0	1	2	25	Q6K8D9	Q6K8D9 [236-255]	0	2658.36	High	High	High	High	High	High	High	High	High	S4(Phospho): 99.99; S12(Phospho): 100	1	1.0617	1.01471	1.01052	0.917846	0.891294	1.02276	1.03824	1.05799	25	25	25	25	25	25	25	25	25	Unique	6.02998	High	0	2.06e-08
FALSE	High	[K].FHSDDEGDAPAHR.[R]	1xTMT6plex [N-Term]; 1xPhospho [S3(100)]	Q0IZV2 1xPhospho [S144(100)]	7.94242e-07	0	1	1	3	Q0IZV2	Q0IZV2 [142-154]	0	1762.74	High	High	High	High	High	High	High	High	High	S3(Phospho): 100	1	0.97339	1.05381	1.13757	1.05557	1.03887	1.45365	1.2409	1.51399	3	3	3	3	3	3	3	3	3	Unique	4.57901	High	0	4.08e-08
FALSE	High	[R].SPSVSAAEADGDDGVVR.[V]	1xTMT6plex [N-Term]; 1xPhospho [S3(99.4)]	Q5N7H0 1xPhospho [S50(99.4)]	6.67295e-07	0	1	1	13	Q5N7H0	Q5N7H0 [48-64]	0	1940.88	High	High	High	High	High	High	High	High	High	S3(Phospho): 99.47	1	1.10839	1.04141	1.03007	0.921867	0.902044	1.03981	0.954684	1.09297	9	9	9	9	9	9	9	9	9	Unique	4.94752	High	0	3.33e-08
FALSE	High	[K].KPALSQSASFPAR.[G]	2xTMT6plex [N-Term; K1]; 1xPhospho [S9(99.6)]		1.50942e-05	0	1	1	6	Q2R2B9	Q2R2B9 [80-92]	0	1898.03	High	High	High	High	High	High	High	High	High	S9(Phospho): 99.55	1	1.32357	0.908853	0.916704	0.664508	0.66163	0.522744	0.535929	0.535628	6	6	6	6	6	6	6	6	6	Unique	4.01217	High	0	1.263e-06
FALSE	High	[R].VVGQFSSAESR.[K]	1xTMT6plex [N-Term]; 1xPhospho [S10(100)]	Q7Y0D4 1xPhospho [S249(100)]	0.000346895	0	1	1	6	Q7Y0D4	Q7Y0D4 [240-250]	0	1475.71	High	High	High	High	High	High	High	High	High	S10(Phospho): 100	1	0.917565	0.751496	0.699744	0.662498	0.562923	0.733925	0.720335	0.740711	6	6	6	6	6	6	6	6	6	Unique	3.44594	High	0	4.884e-05
FALSE	High	[K].EISDDEDEEEKKDAEEGK.[V]	4xTMT6plex [N-Term; K11; K12; K18]; 1xPhospho [S3(100)]	Q07078 1xPhospho [S220(100)]	1.45958e-07	0	1	4	6	Q07078	Q07078 [218-235]	2	3091.5	High	High	High	High	High	High	High	High	High	S3(Phospho): 100	1	1.05764	0.943185	0.960682	0.617259	0.871748	1.04359	1.00655	1.12434	6	6	6	6	6	6	6	6	6	Unique	5.6654	High	0	9.752e-08
FALSE	High	[R].NLSLEELAGEVGLSPGR.[R]	1xTMT6plex [N-Term]; 2xPhospho [S3(100); S14(100)]	Q688K3 2xPhospho [S71(100); S82(100)]	9.4143e-11	0	1	1	1	Q688K3	Q688K3 [69-85]	0	2130.01	High	High	High	High	High	High	High	High	High	S3(Phospho): 100; S14(Phospho): 100	1	1.05155	0.86403	0.712449	0.63837	0.702676	0.927113	0.725137	0.955445	1	1	1	1	1	1	1	1	1	Unique	6.06269	High	0	1.078e-12
FALSE	High	[K].AVTPNEPIEASSSGSK.[R]	2xTMT6plex [N-Term; K16]; 1xPhospho [S13(99)]	Q0J9X9 1xPhospho [S19(99.4)]	0.000152796	0	1	1	6	Q0J9X9	Q0J9X9 [8-23]	0	2112.06	High	High	High	High	High	High	High	High	High	S12(Phospho): 99.45	1	1.07489	1.05572	0.974364	0.860544	0.848293	1.05875	0.994062	1.07488	3	3	3	3	3	3	3	3	3	Unique	3.41664	High	0	0.0003457
FALSE	High	[K].GEVADQLSNDEDVGGR.[E]	1xTMT6plex [N-Term]; 1xPhospho [S8(100)]	A0A0P0XT31 1xPhospho [S218(100)]	2.00331e-07	0	1	1	11	A0A0P0XT31	A0A0P0XT31 [211-226]	0	1969.87	High	High	High	High	High	High	High	High	High	S8(Phospho): 100	1	1.09418	0.953676	1.09262	0.91282	0.867839	1.16765	1.12852	1.28358	11	11	11	11	11	11	11	11	11	Unique	4.28487	High	0	8.202e-09
FALSE	High	[K].KPAGMPYGSASAGDAQNAASPVDR.[S]	2xTMT6plex [N-Term; K1]; 1xPhospho [S20(100)]	Q10CW7 1xPhospho [S54(100)]	6.11014e-08	0	1	1	2	Q10CW7	Q10CW7 [35-58]	0	2856.38	High	High	High	High	High	High	High	High	High	S20(Phospho): 100	1	0.89422	1.05953	0.982183	0.98118	1.18937	1.44796	1.34559	1.59482	2	2	2	2	2	2	2	2	2	Unique	5.17486	High	0	2.047e-09
FALSE	High	[K].LESSASSSPQEANVANK.[G]	2xTMT6plex [N-Term; K17]; 1xPhospho [S8(99.5)]	Q6ZGL4 1xPhospho [S319(98.4)]	4.45147e-05	0	1	1	5	Q6ZGL4	Q6ZGL4 [313-329]	0	2257.11	High	High	High	High	High	High	High	High	High	S7(Phospho): 98.37	1	1.0282	0.916482	0.990001	0.96409	0.984137	1.09947	1.08915	1.32097	3	3	3	3	3	3	3	3	3	Unique	3.44411	High	0	1.291e-05
FALSE	High	[R].VESHTDDYYSEGGEIDR.[G]	1xTMT6plex [N-Term]; 1xPhospho [S3(100)]	Q94DL7 1xPhospho [S41(100)]	1.03232e-05	0	1	1	5	Q94DL7	Q94DL7 [39-55]	0	2280.95	High	High	High	High	High	High	High	High	High	S3(Phospho): 100	1	1.082	1.10912	1.13953	1.00129	1.10923	1.61369	1.63372	1.70701	4	4	4	4	4	4	4	4	4	Unique	4.26892	High	0	8.109e-07
FALSE	High	[K].QDATSEPSGTESHK.[S]	2xTMT6plex [N-Term; K14]; 1xPhospho [S/T]		0.000305854	0	1	1	3	Q2R176	Q2R176 [176-189]	0	2011.94	High	High	High	High	High	High	High	High	High	S8(Phospho): 99.29	1	1.04241	0.963212	1.15516	1.0425	0.896181	1.16197	1.14581	1.27513	2	2	2	2	2	2	2	2	2	Unique	3.11148	High	0	4.216e-05
FALSE	High	[R].EEVETEEVESDDESEK.[Y]	2xTMT6plex [N-Term; K16]; 1xPhospho [S/T]	Q7XUK7 1xPhospho [S497(100)]	9.17348e-08	0	1	1	10	Q7XUK7	Q7XUK7 [488-503]	0	2421.05	High	High	High	High	High	High	High	High	High	S10(Phospho): 100	1	0.976435	0.865938	0.997819	0.950016	0.93625	1.08905	1.15158	1.23412	10	10	10	10	10	10	10	10	10	Unique	5.07999	High	0	3.3e-09
FALSE	High	[R].HPENVDSSPNK.[V]	2xTMT6plex [N-Term; K11]; 1xPhospho [S8(100)]	Q5SN81 1xPhospho [S489(99.6)]	0.000677523	0	1	2	3	Q5SN81	Q5SN81 [482-492]	0	1761.86	High	High	High	High	High	High	High	High	High	S8(Phospho): 100	1	1.05662	0.923158	1.08089	1.02642	1.0545	0.967834	1.0709	1.01818	2	2	2	2	2	2	2	2	2	Unique	3.51018	High	0	0.0001073
FALSE	High	[R].TSTASSIGSSEGTSEQIK.[V]	2xTMT6plex [N-Term; K18]; 2xPhospho [S6(98.9); S/T]		2.54486e-05	0	1	3	12	Q6H8D8	Q6H8D8 [322-339]	0	2388.1	High	High	High	High	High	High	High	High	High	S5(Phospho): 99.01; S9(Phospho): 50; S10(Phospho): 50	1	1.12666	0.994684	1.19426	0.959064	0.930386	0.951735	0.884571	1.02783	7	7	7	7	7	7	7	7	7	Unique	3.56348	High	0	2.319e-06
FALSE	High	[R].TSTASSIGSSEGTSEQIK.[V]	2xTMT6plex [N-Term; K18]; 1xPhospho [S9(98.8)]	Q6H8D8 1xPhospho [S330(98.8)]	2.63591e-07	0	1	3	12	Q6H8D8	Q6H8D8 [322-339]	0	2308.13	High	High	High	High	High	High	High	High	High	S9(Phospho): 98.88	1	1.37533	1.08051	1.08382	0.8334	1.00564	1.05401	1.00847	1.13761	5	5	5	5	5	5	5	5	5	Unique	4.89571	High	0	1.123e-08
FALSE	High	[K].SDAAQAEGGGGDDDAEQEDAGSDDGYPQMTEK.[Q]	2xTMT6plex [N-Term; K32]; 1xOxidation [M29(100)]; 1xPhospho [S/Y/T]		2.0787e-07	0	1	1	10	Q5Z7Y7	Q5Z7Y7 [97-128]	0	3770.52	High	High	High	High	High	High	High	High	High	S22(Phospho): 99.24; M29(Oxidation): 100	1	0.976435	1.05477	1.27439	0.971127	1.03691	1.53603	1.30813	1.44523	5	5	5	5	5	5	5	5	5	Unique	4.20777	High	0	8.558e-09
FALSE	High	[K].SDAAQAEGGGGDDDAEQEDAGSDDGYPQMTEK.[Q]	2xTMT6plex [N-Term; K32]; 1xPhospho [S22(99.1)]	Q5Z7Y7 1xPhospho [S118(99.1)]	1.58997e-11	0	1	1	10	Q5Z7Y7	Q5Z7Y7 [97-128]	0	3754.52	High	High	High	High	High	High	High	High	High	S22(Phospho): 100	1	0.95918	0.886918	0.998797	1.05356	1.06525	1.0578	1.17655	1.08091	7	7	7	7	7	7	7	7	7	Unique	6.11875	High	0	1.365e-13
FALSE	High	[R].DPDEENSAAPADR.[A]	1xTMT6plex [N-Term]; 1xPhospho [S7(100)]	Q6ZHP6 1xPhospho [S62(100)]	0.000403845	0	1	1	2	Q6ZHP6	Q6ZHP6 [56-68]	0	1695.71	High	High	High	High	High	High	High	High	High	S7(Phospho): 100	1	0.960195	0.775338	0.825815	0.806257	0.71929	0.92806	0.868243	0.967508	2	2	2	2	2	2	2	2	2	Unique	3.57793	High	0	5.836e-05
FALSE	High	[K].VVHADDSDAER.[S]	1xTMT6plex [N-Term]; 1xPhospho [S7(100)]	A0A0P0VYD4 1xPhospho [S426(100)]	0.000254503	0	1	1	2	A0A0P0VYD4	A0A0P0VYD4 [420-430]	0	1522.67	High	High	High	High	High	High	High	High	High	S7(Phospho): 100	1	1.10128	0.986101	0.932341	0.977159	1.00368	0.934689	0.967169	0.872205	2	2	2	2	2	2	2	2	2	Unique	3.39113	High	0	3.398e-05
FALSE	High	[R].VQPALDPPSPR.[V]	1xTMT6plex [N-Term]; 1xPhospho [S9(100)]	A0A0P0WQC3 1xPhospho [S69(100)]	7.30738e-05	0	1	1	6	A0A0P0WQC3	A0A0P0WQC3 [61-71]	0	1485.77	High	High	High	High	High	High	High	High	High	S9(Phospho): 100	1	0.950045	0.967981	0.968501	0.968111	0.877612	0.838095	0.833667	0.828776	6	6	6	6	6	6	6	6	6	Unique	3.94925	High	0	2.446e-05
FALSE	High	[R].VKGSQLQTPPVADETER.[F]	2xTMT6plex [N-Term; K2]; 1xPhospho [S4(100)]	Q84R70 1xPhospho [S670(100)]	0.000385243	0	1	1	2	Q84R70	Q84R70 [667-683]	1	2393.25	High	High	High	High	High	High	High	High	High	S4(Phospho): 100	1	1.17842	1.0519	1.19817	1.01637	1.03496	1.24152	1.0709	1.37405	2	2	2	2	2	2	2	2	2	Unique	3.51953	High	0	0.0001475
FALSE	High	[K].VAGDAAGSEADGEAELSSSR.[A]	1xTMT6plex [N-Term]; 1xPhospho [S8(100)]	A0A0N7KFI2 1xPhospho [S629(100)]	7.06847e-10	0	1	1	3	A0A0N7KFI2	A0A0N7KFI2 [622-641]	0	2187.96	High	High	High	High	High	High	High	High	High	S8(Phospho): 100	1	1.26774	1.08338	1.17178	1.16917	1.08969	1.25762	1.17367	1.41507	3	3	3	3	3	3	3	3	3	Unique	5.84629	High	0	1.13e-11
FALSE	High	[K].TENDVSPDLSNAK.[T]	2xTMT6plex [N-Term; K13]; 1xPhospho [S6(100)]	Q0DVG7 1xPhospho [S232(100)]	8.46954e-05	0	1	1	3	Q0DVG7	Q0DVG7 [227-239]	0	1927.94	High	High	High	High	High	High	High	High	High	S6(Phospho): 100	1	1.11854	1.0109	0.971432	0.901761	0.907908	0.912908	0.851916	0.897539	3	3	3	3	3	3	3	3	3	Unique	3.85079	High	0	9.404e-06
FALSE	High	[K].ENEGSSSNAGESSSMDIDK.[A]	2xTMT6plex [N-Term; K19]; 1xPhospho [S6(99.5)]	Q5JK78 1xPhospho [S380(99.5)]	8.29825e-08	0	1	1	10	Q5JK78	Q5JK78 [375-393]	0	2482.07	High	High	High	High	High	High	High	High	High	S6(Phospho): 99.54	1	1.11752	0.929834	1.05157	1.00129	0.864907	1.55781	1.38688	1.48263	4	4	4	4	4	4	4	4	4	Unique	4.8383	High	0	4.066e-09
FALSE	High	[K].IEQPGDDSEDDKPLASR.[L]	2xTMT6plex [N-Term; K12]; 1xPhospho [S8(100)]	Q84ZL5 1xPhospho [S188(100)]	6.0363e-07	0	1	1	11	Q84ZL5	Q84ZL5 [181-197]	0	2410.15	High	High	High	High	High	High	High	High	High	S8(Phospho): 100	1	1.07083	1.00804	1.12194	1.00129	0.938204	0.983933	0.965248	0.956651	11	11	11	11	11	11	11	11	11	Unique	5.0051	High	0	6.545e-08
FALSE	High	[K].VEESAEEVEGEK.[S]	2xTMT6plex [N-Term; K12]; 1xPhospho [S4(100)]	Q8H5T5 1xPhospho [S507(100)]	0.000607254	0	1	1	2	Q8H5T5	Q8H5T5 [504-515]	0	1872.89	High	High	High	High	High	High	High	High	High	S4(Phospho): 100	1	0.86783	0.769616	0.893249	0.79922	0.720267	0.896809	0.931633	0.956651	2	2	2	2	2	2	2	2	2	Unique	3.18308	High	0	0.0001944
FALSE	High	[K].ASVCLDSTGK.[H]	2xTMT6plex [N-Term; K10]; 1xCarbamidomethyl [C4]; 1xPhospho [S/T]		0.0007961	0	1	2	6	Q0J709	Q0J709 [120-129]	0	1575.79	High	High	High	High	High	High	High	High	High	S7(Phospho): 99.67	1	1.05865	1.00136	1.11705	1.11489	1.16591	1.34947	1.34174	1.60809	3	3	3	3	3	3	3	3	3	Unique	3.09921	High	0	0.0001293
FALSE	High	[K].LRPDSSDEDDEDISTAK.[K]	2xTMT6plex [N-Term; K17]; 2xPhospho [S5(100); S6(100)]	Q6K7R9 2xPhospho [S237(100); S238(100)]	6.38651e-06	0	1	1	1	Q6K7R9	Q6K7R9 [233-249]	0	2511.09	High	High	High	High	High	High	High	High	High	S5(Phospho): 100; S6(Phospho): 100	1	1.02313	1.01185	1.10532	0.982186	1.00955	1.82487	1.78547	1.99895	1	1	1	1	1	1	1	1	1	Unique	4.10422	High	0	4.629e-07
FALSE	High	[K].LRPDSSDEDDEDISTAK.[K]	2xTMT6plex [N-Term; K17]; 1xPhospho [S5(99.6)]	Q6K7R9 1xPhospho [S237(99.6)]	6.84002e-06	0	1	1	4	Q6K7R9	Q6K7R9 [233-249]	0	2431.13	High	High	High	High	High	High	High	High	High	S5(Phospho): 99.63	1	0.88001	0.990869	1.02812	1.21743	1.15028	1.88737	1.86423	2.02429	2	2	2	2	2	2	2	2	2	Unique	4.04431	High	0	5.019e-07
FALSE	High	[K].EGDSDVDTSDESGTIEK.[A]	2xTMT6plex [N-Term; K17]; 3xPhospho [S4(100); T8(100); S9(98.6)]	Q6ETC4 3xPhospho [S396(100); T400(98.4); S401(98.4)]	3.90949e-06	0	1	1	5	Q6ETC4	Q6ETC4 [393-409]	0	2481.96	High	High	High	High	High	High	High	High	High	S4(Phospho): 100; T8(Phospho): 100; S9(Phospho): 100	1	0.88407	0.779153	0.774996	0.792183	0.770109	0.778434	0.836549	0.988017	5	5	5	5	5	5	5	5	5	Unique	4.33795	High	0	2.608e-07
FALSE	High	[K].EGDSDVDTSDESGTIEK.[A]	2xTMT6plex [N-Term; K17]; 2xPhospho [S4(100); T8(100)]	Q6ETC4 2xPhospho [S396(100); T400(100)]	1.86063e-07	0	1	1	8	Q6ETC4	Q6ETC4 [393-409]	0	2401.99	High	High	High	High	High	High	High	High	High	S4(Phospho): 100; T8(Phospho): 100	1	0.788659	0.584603	0.464216	0.451383	0.441738	0.412892	0.40915	0.51512	8	8	8	8	8	8	8	8	8	Unique	4.94482	High	0	7.484e-09
FALSE	High	[K].EGDSDVDTSDESGTIEK.[A]	2xTMT6plex [N-Term; K17]; 1xPhospho [S4(100)]	Q6ETC4 1xPhospho [S396(100)]	2.94956e-08	0	1	1	3	Q6ETC4	Q6ETC4 [393-409]	0	2322.03	High	High	High	High	High	High	High	High	High	S4(Phospho): 100	1	0.945985	0.618936	0.573673	0.468473	0.459329	0.467818	0.462935	0.564581	3	3	3	3	3	3	3	3	3	Unique	5.37176	High	0	9.216e-10
FALSE	High	[K].QDHAAETASNSPK.[R]	2xTMT6plex [N-Term; K13]; 1xPhospho [S11(98.5)]	Q5QNL2 1xPhospho [S422(98.5)]	2.00007e-06	0	1	2	4	Q5QNL2	Q5QNL2 [412-424]	0	1893.91	High	High	High	High	High	High	High	High	High	S11(Phospho): 99.57	1	1.01907	1.08242	1.25289	0.855517	1.00271	1.3097	1.32061	1.41266	2	2	2	2	2	2	2	2	2	Unique	4.64345	High	0	1.192e-07
FALSE	High	[K].TVAAKSPPVSPVK.[N]	3xTMT6plex [N-Term; K5; K13]; 2xPhospho [S6(100); S10(100)]	A0A0P0X1C3 2xPhospho [S805(100); S809(100)]	2.23039e-05	0	1	1	26	A0A0P0X1C3	A0A0P0X1C3 [800-812]	1	2128.18	High	High	High	High	High	High	High	High	High	S6(Phospho): 100; S10(Phospho): 100	1	1.00993	1.23501	0.848293	0.845464	0.792587	1.18659	0.955644	0.998874	26	26	26	26	26	26	26	26	26	Unique	4.95866	High	0	7.448e-06
FALSE	High	[R].SENSSSPSTSK.[Q]	2xTMT6plex [N-Term; K11]; 1xPhospho [S6(99.1)]	Q337B2 1xPhospho [S449(99.4)]	0.00102618	0	1	1	3	Q337B2	Q337B2 [445-455]	0	1648.78	High	High	High	High	High	High	High	High	High	S5(Phospho): 99.38	1	0.96324	0.923158	1.08578	0.872607	0.995865	1.24152	1.10739	1.24497	2	2	2	2	2	2	2	2	2	Unique	3.08115	High	0	0.000175
FALSE	High	[R].LVHTPVAGTPGGK.[S]	2xTMT6plex [N-Term; K13]; 2xPhospho [T4(100); T9(100)]	Q8GVP5 2xPhospho [T114(100); T119(100)]	4.93942e-07	0	1	2	5	Q8GVP5	Q8GVP5 [111-123]	0	1851.95	High	High	High	High	High	High	High	High	High	T4(Phospho): 100; T9(Phospho): 100	1	1.09113	0.905038	1.18351	1.0425	1.07796	0.908173	0.965248	0.957857	5	5	5	5	5	5	5	5	5	Unique	5.41556	High	0	2.345e-08
FALSE	High	[R].GILAMDESNATCGK.[R]	2xTMT6plex [N-Term; K14]; 1xCarbamidomethyl [C12]; 1xPhospho [S/T]	Q40677 1xPhospho [T68(100)]	4.42124e-07	0	1	1	6	Q40677	Q40677 [58-71]	0	2004.95	High	High	High	High	High	High	High	High	High	T11(Phospho): 100	1	1.07895	1.00708	1.13757	1.19933	1.21869	1.23773	1.19383	1.2498	6	6	6	6	6	6	6	6	6	Unique	4.87839	High	0	2.059e-08
FALSE	High	[R].NASFGGAASNSGPVPNAGDR.[S]	1xTMT6plex [N-Term]; 2xPhospho [S3(100); S11(100)]	Q7X8W5 2xPhospho [S74(100); S82(100)]	4.14797e-10	0	1	1	6	Q7X8W5	Q7X8W5 [72-91]	0	2234.94	High	High	High	High	High	High	High	High	High	S3(Phospho): 100; S11(Phospho): 100	1	1.13072	1.01471	0.985115	0.873613	0.928431	0.992456	1.0392	1.3065	6	6	6	6	6	6	6	6	6	Unique	6.83081	High	0	6.084e-12
FALSE	High	[R].NASFGGAASNSGPVPNAGDR.[S]	1xTMT6plex [N-Term]; 1xPhospho [S3(100)]	Q7X8W5 1xPhospho [S74(100)]	6.0017e-10	0	1	1	5	Q7X8W5	Q7X8W5 [72-91]	0	2154.98	High	High	High	High	High	High	High	High	High	S3(Phospho): 100	1	1.07591	1.00136	0.947977	0.873613	0.908885	1.0578	0.888413	1.10865	5	5	5	5	5	5	5	5	5	Unique	6.85955	High	0	9.368e-12
FALSE	High	[R].DDSGGAPSFSK.[G]	2xTMT6plex [N-Term; K11]; 1xPhospho [S8(100)]	A0A0P0VGR0 1xPhospho [S77(100)]	0.000320646	0	1	1	3	A0A0P0VGR0	A0A0P0VGR0 [70-80]	0	1605.76	High	High	High	High	High	High	High	High	High	S8(Phospho): 100	1	1.04749	0.904085	1.06721	1.1551	1.01932	1.49437	1.26683	1.38371	3	3	3	3	3	3	3	3	3	Unique	3.23523	High	0	4.442e-05
FALSE	High	[R].TAENFSNATGEQGYPGGK.[F]	2xTMT6plex [N-Term; K18]; 1xPhospho [T1(100)]	Q7XV11 1xPhospho [T175(100)]	2.08771e-13	0	1	1	11	Q7XV11	Q7XV11 [175-192]	0	2366.11	High	High	High	High	High	High	High	High	High	T1(Phospho): 100	1	0.931775	1.23501	1.10532	1.37828	1.3213	1.48868	1.47428	1.65393	11	11	11	11	11	11	11	11	11	Unique	7.46606	High	0	5.724e-15
FALSE	High	[K].IDDANAVSTDDDVHPDPK.[A]	2xTMT6plex [N-Term; K18]; 2xPhospho [S8(100); T9(100)]	Q6K678 2xPhospho [S59(100); T60(100)]	6.01417e-08	0	1	1	8	Q6K678	Q6K678 [52-69]	0	2542.12	High	High	High	High	High	High	High	High	High	S8(Phospho): 100; T9(Phospho): 100	1	1.04038	0.960351	1.07307	0.93192	0.913772	1.14871	1.06513	1.18586	8	8	8	8	8	8	8	8	8	Unique	5.3605	High	0	4.236e-09
FALSE	High	[K].HDDESSLDNINVK.[K]	2xTMT6plex [N-Term; K13]; 1xPhospho [S6(99.5)]	Q2QNI2 1xPhospho [S763(99.5)]	0.00150094	0	1	2	4	Q2QNI2	Q2QNI2 [758-770]	0	2023.97	High	High	High	High	High	High	High	High	High	S6(Phospho): 99.48	1	1.09925	0.974657	1.16298	1.07065	1.05939	1.32485	1.27163	1.3065	2	2	2	2	2	2	2	2	2	Unique	2.77338	High	0.000294	0.002211
FALSE	High	[R].QASSYSVPSSEISR.[S]	1xTMT6plex [N-Term]; 1xPhospho [S3(100)]	Q10BA4 1xPhospho [S45(100)]	0.000485055	0	1	1	7	Q10BA4	Q10BA4 [43-56]	0	1806.85	High	High	High	High	High	High	High	High	High	S3(Phospho): 99.46	1	1.23932	1.04237	1.23921	1.06261	1.06525	1.52846	1.40897	1.65514	4	4	4	4	4	4	4	4	4	Unique	3.19024	High	0	9.258e-05
FALSE	High	[K].SNSSTQDSDEDDEGTPSGESR.[M]	1xTMT6plex [N-Term]; 1xPhospho [S8(100)]	Q7XX94 1xPhospho [S925(100)]	0.0011614	0	1	1	1	Q7XX94	Q7XX94 [918-938]	0	2508.97	High	High	High	High	High	High	High	High	High	S8(Phospho): 100	1	0.8658	0.894548	3.25049	3.54572	2.47745	6.38657	5.852	5.70492	1	1	1	1	1	1	1	1	1	Unique	2.38482	High	0	0.0002024
FALSE	High	[R].KPSNQQIASPPPNYEDVTR.[D]	2xTMT6plex [N-Term; K1]; 2xPhospho [S3(100); S9(100)]	Q6K8F1 2xPhospho [S295(100); S301(100)]	1.26777e-08	0	1	1	31	Q6K8F1	Q6K8F1 [293-311]	0	2759.32	High	High	High	High	High	High	High	High	High	S3(Phospho): 100; S9(Phospho): 100	1	1.17436	0.836374	0.948955	0.862554	0.758382	1.13924	1.06898	1.16656	31	31	31	31	31	31	31	31	31	Unique	6.6488	High	0	3.283e-10
FALSE	High	[R].KPSNQQIASPPPNYEDVTR.[D]	2xTMT6plex [N-Term; K1]; 1xPhospho [S/Y/T]	Q6K8F1 1xPhospho [S301(100)]	1.76132e-09	0	1	1	16	Q6K8F1	Q6K8F1 [293-311]	0	2679.35	High	High	High	High	High	High	High	High	High	S3(Phospho): 100	1	1.1632	0.971796	0.913772	0.825358	0.797474	1.09947	0.995022	1.13761	14	14	14	14	14	14	14	14	14	Unique	5.73596	High	0	5.703e-10
FALSE	High	[R].NTHPPEPESIDGGSDMGNGQTPQQLR.[L]	1xTMT6plex [N-Term]; 1xPhospho [T21(100)]	Q0J0H9 1xPhospho [T130(100)]	0.00016021	0	1	1	1	Q0J0H9	Q0J0H9 [110-135]	0	3071.37	High	High	High	High	High	High	High	High	High	T21(Phospho): 100	1	0.585658	1.06144	0.960682	1.0224	1.23921	1.35705	1.24762	1.666	1	1	1	1	1	1	1	1	1	Unique	3.40492	High	0	1.977e-05
FALSE	High	[K].SQLESESSVGPNGK.[A]	2xTMT6plex [N-Term; K14]; 1xPhospho [S8(99.3)]	Q8S3S1 1xPhospho [S158(99.3)]	0.00153976	0	1	1	2	Q8S3S1	Q8S3S1 [151-164]	0	1956.97	High	High	High	High	High	High	High	High	High	S8(Phospho): 99.29	1	1.3124	1.04523	1.07698	0.997265	0.895203	1.0739	1.00175	1.15811	1	1	1	1	1	1	1	1	1	Unique	2.76119	High	0	0.0002821
FALSE	High	[R].DQLEGGGGAHGPEVVADEEVTSHR.[F]	1xTMT6plex [N-Term]; 1xPhospho [S22(99.3)]	A3C592 1xPhospho [S233(99.1)]	1.69473e-08	0	1	1	7	A3C592	A3C592 [212-235]	0	2755.25	High	High	High	High	High	High	High	High	High	S22(Phospho): 99.27	1	1.03734	1.09577	1.08871	1.02944	0.88934	1.32675	1.11988	1.25704	4	4	4	4	4	4	4	4	4	Unique	6.49828	High	0	4.591e-10
FALSE	High	[K].HSLDPELNGSPSSK.[D]	2xTMT6plex [N-Term; K14]; 1xPhospho [S10(100)]	Q6F3A8 1xPhospho [S367(100)]	5.94929e-05	0	1	1	2	Q6F3A8	Q6F3A8 [358-371]	0	2006	High	High	High	High	High	High	High	High	High	S10(Phospho): 100	1	1.09824	1.1425	1.00759	0.934936	0.975342	1.10988	1.04881	1.08815	2	2	2	2	2	2	2	2	2	Unique	3.92716	High	0	6.215e-06
FALSE	High	[K].ALSASAADDPDQDDDLHRPSSPAQASR.[D]	1xTMT6plex [N-Term]; 2xPhospho [S26(100); S]	Q655M5 2xPhospho [S62(100); S]	3.82613e-09	0	1	1	7	Q655M5	Q655M5 [37-63]	0	3182.36	High	High	High	High	High	High	High	High	High	S20(Phospho): 50; S21(Phospho): 50; S26(Phospho): 99.99	1	1.10737	0.985147	1.0848	0.951021	0.792587	1.48395	1.29564	1.57672	6	6	6	6	6	6	6	6	6	Unique	7.3216	High	0	8.132e-11
FALSE	High	[K].QNSPNNQLTGEGSLSGNAR.[H]	1xTMT6plex [N-Term]; 1xPhospho [S15(99.4)]	Q67W58 1xPhospho [S472(99.3)]	3.66959e-06	0	1	1	4	Q67W58	Q67W58 [458-476]	0	2253.05	High	High	High	High	High	High	High	High	High	S15(Phospho): 99.3	1	1.20786	1.23882	1.16201	1.00732	1.00466	1.37031	1.32157	1.51761	4	4	4	4	4	4	4	4	4	Unique	4.29036	High	0	2.43e-07
FALSE	High	[R].ASVASYTNDSSGAESSPR.[T]	1xTMT6plex [N-Term]; 1xPhospho [S/Y/T]		4.36369e-12	0	1	1	14	Q0DXR0	Q0DXR0 [836-853]	0	2094.92	High	High	High	High	High	High	High	High	High	S16(Phospho): 99.57	1	1.16624	0.955583	0.830702	0.736891	0.767178	0.992456	0.939316	1.06884	7	7	7	7	7	7	7	7	7	Unique	6.68266	High	0	3.009e-14
FALSE	High	[R].HMSPPTPPAAAEESK.[A]	2xTMT6plex [N-Term; K15]; 1xOxidation [M2(100)]; 1xPhospho [S3(100)]	Q2QW44 1xPhospho [S47(100)]	0.000219675	0	1	1	1	Q2QW44	Q2QW44 [45-59]	0	2104.02	High	High	High	High	High	High	High	High	High	M2(Oxidation): 100; S3(Phospho): 100	1	1.0282	1.05953	1.19719	1.03446	0.911817	1.25099	1.23225	1.22205	1	1	1	1	1	1	1	1	1	Unique	3.12501	High	0	2.87e-05
FALSE	High	[R].HMSPPTPPAAAEESK.[A]	2xTMT6plex [N-Term; K15]; 1xPhospho [S3(100)]	Q2QW44 1xPhospho [S47(100)]	4.27644e-06	0	1	1	10	Q2QW44	Q2QW44 [45-59]	0	2088.02	High	High	High	High	High	High	High	High	High	S3(Phospho): 100	1	1.07591	0.966074	1.04766	1.02944	0.922568	1.03223	0.994062	1.13157	10	10	10	10	10	10	10	10	10	Unique	4.08976	High	0	2.903e-07
FALSE	High	[K].ADSDAEDGKDSDDEKHDEL.[-]	3xTMT6plex [N-Term; K9; K15]; 2xPhospho [S3(100); S11(100)]	Q9SLY8 2xPhospho [S408(100); S416(100)]	2.54846e-09	0	1	1	27	Q9SLY8	Q9SLY8 [406-424]	2	2938.25	High	High	High	High	High	High	High	High	High	S3(Phospho): 100; S11(Phospho): 100	1	1.06068	0.951768	1.11705	0.736891	0.920613	1.16481	0.977734	1.12434	27	27	27	27	27	27	27	27	27	Unique	8.02685	High	0	5.044e-11
FALSE	High	[K].ADSDAEDGKDSDDEKHDEL.[-]	3xTMT6plex [N-Term; K9; K15]; 1xPhospho [S3(100)]	Q9SLY8 1xPhospho [S408(100)]	8.20723e-11	0	1	1	22	Q9SLY8	Q9SLY8 [406-424]	2	2858.28	High	High	High	High	High	High	High	High	High	S3(Phospho): 100	1	1.12767	0.973703	0.710494	0.513712	0.5854	0.70078	0.600279	0.633344	19	19	19	19	19	19	19	19	19	Unique	8.05493	High	0	9.216e-13
FALSE	High	[K].MVPMSGTGPSSPPSR.[G]	1xTMT6plex [N-Term]; 2xPhospho [S11(99); S14(100)]	A1A6F0 2xPhospho [S321(99); S324(100)]	0.00097448	0	1	1	1	A1A6F0	A1A6F0 [311-325]	0	1876.79	High	High	High	High	High	High	High	High	High	S11(Phospho): 98.96; S14(Phospho): 99.99	1	1.07997	0.939371	0.939182	0.866575	0.987069	1.21311	1.15446	1.3077	1	1	1	1	1	1	1	1	1	Unique	3.14711	High	0	0.0001647
FALSE	High	[K].MVPMSGTGPSSPPSR.[G]	1xTMT6plex [N-Term]; 1xPhospho [S11(100)]	A1A6F0 1xPhospho [S321(100)]	4.52281e-08	0	1	1	4	A1A6F0	A1A6F0 [311-325]	0	1796.83	High	High	High	High	High	High	High	High	High	S11(Phospho): 100	1	1.10331	0.939371	1.07503	1.03145	1.05841	1.17617	1.10932	1.175	3	3	3	3	3	3	3	3	3	Unique	5.53854	High	0	1.444e-09
FALSE	High	[R].SGSMDGVNSPFEGESALSGGLPDYAK.[K]	2xTMT6plex [N-Term; K26]; 1xPhospho [S1(99.2)]	Q2QXC3 1xPhospho [S122(99.2)]	8.61054e-08	0	1	1	3	Q2QXC3	Q2QXC3 [122-147]	0	3110.44	High	High	High	High	High	High	High	High	High	S1(Phospho): 99.2	1	1.06068	0.836374	0.926477	0.900756	0.825815	0.923325	1.0661	1.22929	2	2	2	2	2	2	2	2	2	Unique	5.09529	High	0	3.208e-09
FALSE	High	[R].RSPGPSPLGGSPTMGDR.[T]	1xTMT6plex [N-Term]; 3xPhospho [S2(100); S6(100); S11(98.3)]	Q65WW0 3xPhospho [S521(100); S525(100); S530(98.3)]	2.99184e-07	0	1	1	5	Q65WW0	Q65WW0 [520-536]	1	2137.87	High	High	High	High	High	High	High	High	High	S2(Phospho): 100; S6(Phospho): 100; S11(Phospho): 99.99	1	1.03531	0.942232	1.10532	1.07166	1.01052	1.07011	1.06417	1.1364	5	5	5	5	5	5	5	5	5	Unique	6.10034	High	0	1.303e-08
FALSE	High	[R].RSPGPSPLGGSPTMGDR.[T]	1xTMT6plex [N-Term]; 2xPhospho [S2(100); S6(100)]	Q65WW0 2xPhospho [S521(100); S525(100)]	0.00167058	0	1	1	5	Q65WW0	Q65WW0 [520-536]	1	2057.91	High	High	High	High	High	High	High	High	High	S2(Phospho): 100; S6(Phospho): 100	1	1.03531	1.07575	1.03691	0.945995	0.941136	1.02655	0.966209	1.08935	5	5	5	5	5	5	5	5	5	Unique	3.44028	High	0	0.0003115
FALSE	High	[R].YEASGDEDDDDGSTDS.[-]	1xTMT6plex [N-Term]; 1xPhospho [S4(100)]	Q6YYJ6 1xPhospho [S322(100)]	0.000892373	0	1	2	3	Q6YYJ6	Q6YYJ6 [319-334]	0	1986.68	High	High	High	High	High	High	High	High	High	S4(Phospho): 100	1	1.16421	0.949861	1.47963	1.24457	1.11705	2.12791	1.61067	2.24023	3	3	3	3	3	3	3	3	3	Unique	3.22079	High	0	0.0001484
FALSE	High	[K].ASSKPTSPGQLTGER.[T]	2xTMT6plex [N-Term; K4]; 2xPhospho [S3(98.9); T/S]	Q2QX49 2xPhospho [S42(98.9); T/S]	1.74363e-06	0	1	1	11	Q2QX49	Q2QX49 [40-54]	0	2134.03	High	High	High	High	High	High	High	High	High	S3(Phospho): 99.08; T6(Phospho): 50; S7(Phospho): 50	1	0.860725	0.970842	0.846338	1.02642	0.906931	1.19038	1.21689	1.11469	11	11	11	11	11	11	11	11	11	Unique	5.07865	High	0	1.015e-07
FALSE	High	[K].ASSKPTSPGQLTGER.[T]	2xTMT6plex [N-Term; K4]; 1xPhospho [S/T]	Q2QX49 1xPhospho [S46(98.4)]	3.8201e-05	0	1	1	12	Q2QX49	Q2QX49 [40-54]	0	2054.07	High	High	High	High	High	High	High	High	High	S7(Phospho): 98.47	1	0.827229	1.06144	0.845361	1.07769	0.980228	1.22731	1.21881	1.18224	7	7	7	7	7	7	7	7	7	Unique	3.68981	High	0	2.692e-05
FALSE	High	[R].QFNSPPQGPPSR.[V]	1xTMT6plex [N-Term]; 1xPhospho [S4(100)]	B7EY91 1xPhospho [S137(100)]	0.000166223	0	1	1	5	B7EY91	B7EY91 [134-145]	0	1620.77	High	High	High	High	High	High	High	High	High	S4(Phospho): 100	1	0.95106	0.842096	0.881521	0.851496	0.823861	0.901544	0.953723	1.01576	5	5	5	5	5	5	5	5	5	Unique	3.13595	High	0	2.071e-05
FALSE	High	[K].EISDDEDEEEKK.[D]	3xTMT6plex [N-Term; K11; K12]; 1xPhospho [S3(100)]	Q07078 1xPhospho [S220(100)]	0.000132545	0	1	4	13	Q07078	Q07078 [218-229]	1	2233.07	High	High	High	High	High	High	High	High	High	S3(Phospho): 100	1	1.42304	0.869752	1.02421	0.529797	0.725154	0.982039	0.902819	1.0423	13	13	13	13	13	13	13	13	13	Unique	4.72104	High	0	3.367e-05
FALSE	High	[K].KAELPSDDNQAK.[D]	3xTMT6plex [N-Term; K1; K12]; 1xPhospho [S6(100)]	Q0JBZ3 1xPhospho [S350(100)]	0.000105678	0	1	2	4	Q0JBZ3	Q0JBZ3 [345-356]	1	2083.1	High	High	High	High	High	High	High	High	High	S6(Phospho): 100	1	1.07794	0.961305	1.07112	1.0415	0.946023	1.47543	1.35327	1.47539	4	4	4	4	4	4	4	4	4	Unique	3.44755	High	0	1.222e-05
FALSE	High	[K].TSRSVSPGNQVEGNNK.[A]	2xTMT6plex [N-Term; K16]; 3xPhospho [S4(99.4); S6(100); S/T]	Q5JKF2 3xPhospho [S728(99.6); S730(100); S732(100)]	7.71959e-09	0	1	3	13	Q5JKF2	Q5JKF2 [727-742]	1	2372.05	High	High	High	High	High	High	High	High	High	S2(Phospho): 99.64; S4(Phospho): 100; S6(Phospho): 100	1	1.01907	0.988008	1.02323	1.01838	1.08089	1.19227	1.21496	1.21481	7	7	7	7	7	7	7	7	7	Unique	6.31528	High	0	1.843e-10
FALSE	High	[R].HDSEEPQDLSPPR.[R]	1xTMT6plex [N-Term]; 2xPhospho [S3(100); S10(100)]	Q6ZKE8 2xPhospho [S237(100); S244(100)]	0.000339694	0	1	2	7	Q6ZKE8	Q6ZKE8 [235-247]	0	1895.78	High	High	High	High	High	High	High	High	High	S3(Phospho): 100; S10(Phospho): 100	1	1.01196	0.982286	1.02225	0.967106	0.926477	1.20364	1.07474	1.20637	7	7	7	7	7	7	7	7	7	Unique	3.73921	High	0	5.631e-05
FALSE	High	[K].TVVVTEDEGTSK.[T]	2xTMT6plex [N-Term; K12]; 1xPhospho [T5(100)]	Q5TKJ2 1xPhospho [T206(100)]	0.000959473	0	1	1	3	Q5TKJ2	Q5TKJ2 [202-213]	0	1802.92	High	High	High	High	High	High	High	High	High	T5(Phospho): 100	1	1.27485	1.0767	1.19719	1.06261	1.0203	1.19322	1.1266	1.15932	3	3	3	3	3	3	3	3	3	Unique	3.06748	High	0	0.0001611
FALSE	High	[R].NRLSENTEIQSAK.[L]	2xTMT6plex [N-Term; K13]; 1xPhospho [S4(100)]	Q9ST27 1xPhospho [S503(100)]	4.12808e-07	0	1	2	12	Q9ST27	Q9ST27 [500-512]	1	2028.05	High	High	High	High	High	High	High	High	High	S4(Phospho): 100	1	0.85362	1.11771	0.90009	0.968111	1.06916	0.991509	1.04785	0.981985	12	12	12	12	12	12	12	12	12	Unique	5.64049	High	0	2.25e-08
FALSE	High	[K].GDSDEEDDDYDK.[R]	2xTMT6plex [N-Term; K12]; 1xPhospho [S3(100)]	Q84L14 1xPhospho [S230(100)]	0.000100254	0	1	1	4	Q84L14	Q84L14 [228-239]	0	1940.77	High	High	High	High	High	High	High	High	High	S3(Phospho): 100	1	1.05967	0.829698	1.06232	0.746944	0.781837	1.60611	1.27931	1.58638	4	4	4	4	4	4	4	4	4	Unique	3.75758	High	0	1.144e-05
FALSE	High	[R].ASTAGGSGGFSGGGGSNMLR.[F]	1xTMT6plex [N-Term]; 1xOxidation [M18(100)]; 1xPhospho [S7(99.9)]	Q2RBP5 1xPhospho [S47(99.9)]	5.33754e-06	0	1	1	2	Q2RBP5	Q2RBP5 [41-60]	0	2052.9	High	High	High	High	High	High	High	High	High	S7(Phospho): 99.94; M18(Oxidation): 100	1	0.958165	1.01471	0.82777	0.836416	0.797474	1.02465	1.00847	1.05316	2	2	2	2	2	2	2	2	2	Unique	4.1901	High	0	3.751e-07
FALSE	High	[R].ASTAGGSGGFSGGGGSNMLR.[F]	1xTMT6plex [N-Term]; 1xPhospho [S7(99.1)]	Q2RBP5 1xPhospho [S56(100)]	4.35671e-11	0	1	1	9	Q2RBP5	Q2RBP5 [41-60]	0	2036.91	High	High	High	High	High	High	High	High	High	S16(Phospho): 98.58	1	1.22308	0.964166	1.06623	1.03848	0.964591	1.09379	1.16118	1.08332	3	3	3	3	3	3	3	3	3	Unique	5.93897	High	0	4.419e-13
FALSE	High	[K].SGTDDYSGGGGYNK.[S]	2xTMT6plex [N-Term; K14]; 1xPhospho [T/S/Y]	A0A0P0WAD7 1xPhospho [S91(100)]	2.20698e-05	0	1	1	11	A0A0P0WAD7	A0A0P0WAD7 [85-98]	0	1915.85	High	High	High	High	High	High	High	High	High	S7(Phospho): 100	1	0.937865	0.91076	0.947	0.922873	0.868816	1.11178	1.26875	1.39698	4	4	4	4	4	4	4	4	4	Unique	3.89316	High	0	7.493e-06
FALSE	High	[R].GGNVSDDSEDEKPLAAR.[F]	2xTMT6plex [N-Term; K12]; 2xPhospho [S5(100); S8(100)]	Q84ZL5 2xPhospho [S211(100); S214(100)]	8.76537e-06	0	1	1	7	Q84ZL5	Q84ZL5 [207-223]	0	2378.07	High	High	High	High	High	High	High	High	High	S5(Phospho): 100; S8(Phospho): 100	1	0.923655	0.700952	0.810179	0.842448	0.750563	0.817261	0.857678	0.972334	7	7	7	7	7	7	7	7	7	Unique	4.35468	High	0	6.688e-07
FALSE	High	[R].EGSPVDGVVQPQQQPSPTTASGQQSQQQK.[V]	2xTMT6plex [N-Term; K29]; 1xPhospho [S3(100)]	Q5QN03 1xPhospho [S117(100)]	0.000391347	0	1	1	1	Q5QN03	Q5QN03 [115-143]	0	3559.74	High	High	High	High	High	High	High	High	High	S3(Phospho): 100	1	1.06373	0.72384	0.893249	1.16817	0.828747	1.07011	1.1583	1.3439	1	1	1	1	1	1	1	1	1	Unique	3.56423	High	0	5.621e-05
FALSE	High	[R].GANEEGSSVNEDLNERSPNTAATK.[K]	2xTMT6plex [N-Term; K24]; 1xPhospho [S17(100)]		3.60863e-12	0	1	1	10	Q6H7U2	Q6H7U2 [251-274]	1	3028.43	High	High	High	High	High	High	High	High	High	S17(Phospho): 100	1	1.01805	1.03188	1.08382	1.04552	1.02127	1.17428	1.36575	1.3258	8	8	8	8	8	8	8	8	8	Unique	7.54701	High	0	2.409e-14
FALSE	High	[R].ESDYDSDDDPSVPAR.[L]	1xTMT6plex [N-Term]; 1xPhospho [S6(100)]	Q7XKE1 1xPhospho [S172(100)]	9.06258e-07	0	1	1	5	Q7XKE1	Q7XKE1 [167-181]	0	1976.8	High	High	High	High	High	High	High	High	High	S6(Phospho): 100	1	1.05155	1.04618	0.949932	0.966101	0.951886	1.5152	1.384	1.52364	5	5	5	5	5	5	5	5	5	Unique	3.61547	High	0	4.756e-08
FALSE	High	[K].GEDAGDPSVAYGDSTTGNTPR.[I]	1xTMT6plex [N-Term]; 1xPhospho [T/S/Y]	Q67WN8 1xPhospho [T161(100)]	0.000670499	0	1	1	2	Q67WN8	Q67WN8 [143-163]	0	2376.02	High	High	High	High	High	High	High	High	High	T19(Phospho): 99.98	1	1.2718	1.13487	1.15028	1.26568	1.22748	1.96124	1.83253	2.25953	2	2	2	2	2	2	2	2	2	Unique	3.46702	High	0	0.0001059
FALSE	High	[R].GGGGGGGDEDTDDEDWTGGGAR.[V]	1xTMT6plex [N-Term]; 1xPhospho [T11(100)]	A0A0P0X1V3 1xPhospho [T890(100)]	2.01713e-08	0	1	2	2	A0A0P0X1V3	A0A0P0X1V3 [880-901]	0	2346.89	High	High	High	High	High	High	High	High	High	T11(Phospho): 100	1	1.30124	1.1406	1.2353	1.07568	1.20403	1.46311	1.39457	1.88917	2	2	2	2	2	2	2	2	2	Unique	4.63801	High	0	5.64e-10
FALSE	High	[R].AADLQTAAPGSVDGR.[G]	1xTMT6plex [N-Term]; 1xPhospho [S11(100)]	Q2R176 1xPhospho [S168(100)]	1.54978e-05	0	1	1	1	Q2R176	Q2R176 [158-172]	0	1737.84	High	High	High	High	High	High	High	High	High	S11(Phospho): 100	1	0.952075	0.99373	0.989024	0.88266	0.913772	0.924272	1.04016	1.21361	1	1	1	1	1	1	1	1	1	Unique	3.99925	High	0	1.3e-06
FALSE	High	[K].RSSSASEDEMLNSNSK.[R]	2xTMT6plex [N-Term; K16]; 3xPhospho [S4(100); S6(100); S]	Q655M5 3xPhospho [S731(99.7); S733(100); S]	1.91651e-09	0	1	2	10	Q655M5	Q655M5 [728-743]	1	2439.99	High	High	High	High	High	High	High	High	High	S2(Phospho): 50; S3(Phospho): 50; S4(Phospho): 100; S6(Phospho): 100	1	1.05764	0.940324	1.06916	1.1179	1.01932	1.35042	1.37056	1.44523	10	10	10	10	10	10	10	10	10	Unique	6.91342	High	0	3.622e-11
FALSE	High	[K].GSADNDNEEGDKNANISDEHLK.[K]	3xTMT6plex [N-Term; K12; K22]; 1xPhospho [S17(100)]	Q10H93 1xPhospho [S227(100)]	8.79007e-11	0	1	2	4	Q10H93	Q10H93 [211-232]	1	3139.48	High	High	High	High	High	High	High	High	High	S17(Phospho): 100	1	1.00993	1.14918	1.1278	1.08774	0.947	1.44796	1.31965	1.26186	4	4	4	4	4	4	4	4	4	Unique	6.35684	High	0	9.969e-13
FALSE	High	[K].AAVSGQQQDWNSPAR.[L]	1xTMT6plex [N-Term]; 1xPhospho [S12(100)]	Q84QV5 1xPhospho [S1040(100)]	1.14078e-08	0	1	2	11	Q84QV5	Q84QV5 [1029-1043]	0	1923.89	High	High	High	High	High	High	High	High	High	S12(Phospho): 100	1	1.08098	0.954629	1.00759	0.898745	0.857089	0.957417	0.823102	0.957857	11	11	11	11	11	11	11	11	11	Unique	5.70275	High	0	1.386e-09
FALSE	High	[R].KPATSIGSAYR.[L]	2xTMT6plex [N-Term; K1]; 1xPhospho [S/T/Y]		0.00106945	0	1	1	4	Q658H5	Q658H5 [494-504]	0	1688.91	High	High	High	High	High	High	High	High	High	S8(Phospho): 99.55	1	0.891175	0.809671	0.87468	0.776098	0.883476	1.09473	1.12852	1.2498	4	4	4	4	4	4	4	4	4	Unique	2.78959	High	0	0.0001832
FALSE	High	[R].DFNSSPSPTAPPAR.[S]	1xTMT6plex [N-Term]; 2xPhospho [S7(100); S/T]	B7F9Q5 2xPhospho [S24(99.4); S/T]	0.00124812	0	1	1	9	B7F9Q5	B7F9Q5 [18-31]	0	1832.78	High	High	High	High	High	High	High	High	High	S4(Phospho): 50; S5(Phospho): 50; S7(Phospho): 100	1	1.02516	1.01471	1.08578	1.09076	0.956773	1.60138	1.384	1.58879	9	9	9	9	9	9	9	9	9	Unique	3.14511	High	0	0.0002199
FALSE	High	[R].DFNSSPSPTAPPAR.[S]	1xTMT6plex [N-Term]; 1xPhospho [S7(100)]	B7F9Q5 1xPhospho [S24(100)]	6.4203e-06	0	1	1	13	B7F9Q5	B7F9Q5 [18-31]	0	1752.82	High	High	High	High	High	High	High	High	High	S7(Phospho): 100	1	1.09519	1.05763	1.00075	0.993244	0.965569	1.07485	1.03536	1.14243	10	10	10	10	10	10	10	10	10	Unique	4.6083	High	0	7.008e-07
FALSE	High	[K].SGADDYSSSGGYSK.[S]	2xTMT6plex [N-Term; K14]; 1xPhospho [S8(98.9)]		0.000660098	0	1	1	13	A0A0P0WAD7	A0A0P0WAD7 [99-112]	0	1918.85	High	High	High	High	High	High	High	High	High	S8(Phospho): 98.86	1	0.868845	0.907899	0.732972	0.99626	0.854157	1.04549	1.18327	1.35475	2	2	2	2	2	2	2	2	2	Unique	2.71854	High	0	0.0001523
FALSE	High	[K].VQELHDEAEQEHGSDADESSETSSSAEAEAR.[K]	1xTMT6plex [N-Term]; 1xPhospho [S14(100)]	Q6L529 1xPhospho [S360(100)]	4.32889e-07	0	1	1	1	Q6L529	Q6L529 [347-377]	0	3639.5	High	High	High	High	High	High	High	High	High	S14(Phospho): 100	1	1.94881	1.33515	1.65456	1.35415	1.31642	2.34856	2.22824	2.18715	1	1	1	1	1	1	1	1	1	Unique	4.97575	High	0	2.009e-08
FALSE	High	[K].GSQLQTPPVADETER.[F]	1xTMT6plex [N-Term]; 1xPhospho [T6(100)]	Q84R70 1xPhospho [T674(100)]	3.74788e-06	0	1	1	3	Q84R70	Q84R70 [669-683]	0	1936.92	High	High	High	High	High	High	High	High	High	T6(Phospho): 100	1	1.22714	1.12534	1.06037	1.12092	0.935272	1.21784	1.16598	1.35113	3	3	3	3	3	3	3	3	3	Unique	3.6861	High	0	2.489e-07
FALSE	High	[K].DGNKDEAEEEEVSEADK.[K]	3xTMT6plex [N-Term; K4; K17]; 1xPhospho [S13(100)]	Q10H93 1xPhospho [S250(100)]	2.78321e-08	0	1	2	5	Q10H93	Q10H93 [238-254]	1	2661.24	High	High	High	High	High	High	High	High	High	S13(Phospho): 100	1	0.680054	0.581742	0.520899	0.614243	0.590287	0.696992	0.906661	1.18586	5	5	5	5	5	5	5	5	5	Unique	5.40828	High	0	8.209e-10
FALSE	High	[K].VAMSPTKPQQQQK.[K]	3xTMT6plex [N-Term; K7; K13]; 1xPhospho [S4(100)]	Q0DL73 1xPhospho [S72(100)]	0.000350553	0	1	1	10	Q0DL73	Q0DL73 [69-81]	0	2238.23	High	High	High	High	High	High	High	High	High	S4(Phospho): 100	1	1.25861	1.03092	0.696812	0.534824	0.526763	0.429938	0.378416	0.457214	7	7	7	7	7	7	7	7	7	Unique	3.58497	High	0	4.934e-05
FALSE	High	[K].ASGTLKTPENSPK.[A]	3xTMT6plex [N-Term; K6; K13]; 2xPhospho [T7(99.1); S11(100)]	Q5W645 2xPhospho [T462(99.2); S466(100)]	0.000264036	0	1	1	29	Q5W645	Q5W645 [456-468]	1	2177.12	High	High	High	High	High	High	High	High	High	T7(Phospho): 100; S11(Phospho): 100	1	1.0282	1.06049	1.16787	0.847475	0.992933	1.1847	1.04977	1.19672	19	19	19	19	19	19	19	19	19	Unique	4.73705	High	0	3.555e-05
FALSE	High	[R].SLRASPVHPVK.[D]	2xTMT6plex [N-Term; K11]; 2xPhospho [S1(100); S5(100)]	Q10E10 2xPhospho [S835(100); S839(100)]	0.000403845	0	1	3	4	Q10E10	Q10E10 [835-845]	1	1808.96	High	High	High	High	High	High	High	High	High	S1(Phospho): 100; S5(Phospho): 100	1	0.978465	0.966074	1.14441	1.07568	1.13464	1.27656	1.21689	1.22326	4	4	4	4	4	4	4	4	4	Unique	3.79076	High	0	5.82e-05
FALSE	High	[R].EYGYEEDKSDSDSDEEGGVR.[K]	2xTMT6plex [N-Term; K8]; 2xPhospho [S9(100); S/Y]	Q84UQ1 2xPhospho [S857(100); S/Y]	4.96555e-07	0	1	3	2	Q84UQ1	Q84UQ1 [849-868]	1	2884.15	High	High	High	High	High	High	High	High	High	S9(Phospho): 99.99; S11(Phospho): 99.13	1	1.09012	1.20449	0.843407	0.774087	0.809201	1.00003	0.829826	0.969921	2	2	2	2	2	2	2	2	2	Unique	4.54737	High	0	2.356e-08
FALSE	High	[K].DDDESGDEYADEEEEER.[D]	1xTMT6plex [N-Term]; 1xPhospho [S5(100)]	Q60DW3 1xPhospho [S188(100)]	2.21102e-06	0	1	1	1	Q60DW3	Q60DW3 [184-200]	0	2340.84	High	High	High	High	High	High	High	High	High	S5(Phospho): 100	1	0.786629	0.633241	0.612765	0.498633	0.508194	0.950788	0.791408	0.869792	1	1	1	1	1	1	1	1	1	Unique	3.11791	High	0	1.341e-07
FALSE	High	[K].SEVDDDQDGGSDEENEDDEE.[-]	1xTMT6plex [N-Term]; 1xPhospho [S11(100)]	Q6ESQ0 1xPhospho [S136(100)]	0.00176667	0	1	1	2	Q6ESQ0	Q6ESQ0 [126-145]	0	2536.87	High	High	High	High	High	High	High	High	High	S11(Phospho): 100	1	1.11143	1.11485	1.1278	0.919857	0.899112	1.98396	1.63372	1.90848	2	2	2	2	2	2	2	2	2	Unique	2.26902	High	0	0.0003313
FALSE	High	[K].ELPVHRSDDDNDDDNEDHQLTK.[S]	2xTMT6plex [N-Term; K22]; 1xPhospho [S7(100)]	Q0JLQ1 1xPhospho [S338(100)]	3.64281e-08	0	1	1	2	Q0JLQ1	Q0JLQ1 [332-353]	1	3145.41	High	High	High	High	High	High	High	High	High	S7(Phospho): 100	1	0.99775	0.906946	1.04766	0.853506	0.866862	1.09189	1.06513	1.19672	2	2	2	2	2	2	2	2	2	Unique	5.6086	High	0	1.119e-09
FALSE	High	[R].RSSMDSSFGSATK.[G]	2xTMT6plex [N-Term; K13]; 2xPhospho [S3(99.2); S7(99.2)]	Q10QF7 2xPhospho [S35(99.2); S39(99.2)]	0.000911061	0	1	1	3	Q10QF7	Q10QF7 [33-45]	1	1978.87	High	High	High	High	High	High	High	High	High	S3(Phospho): 99.25; S7(Phospho): 99.25	1	1.10331	0.967027	1.1581	1.03647	0.927454	1.16007	1.1266	1.16656	2	2	2	2	2	2	2	2	2	Unique	3.26318	High	0	0.0001516
FALSE	High	[R].NSPGNEEGCEGDNIGK.[L]	2xTMT6plex [N-Term; K16]; 1xCarbamidomethyl [C9]; 1xPhospho [S2(100)]	A0A0P0VPQ7 1xPhospho [S55(100)]	4.48249e-09	0	1	1	6	A0A0P0VPQ7	A0A0P0VPQ7 [54-69]	0	2214.97	High	High	High	High	High	High	High	High	High	S2(Phospho): 100	1	1.11854	1.10912	0.968501	0.733875	0.860998	0.951735	0.906661	1.02179	6	6	6	6	6	6	6	6	6	Unique	5.9759	High	0	9.777e-11
FALSE	High	[R].GANEEGSSVNEDLNERSPNTAATK.[K]	2xTMT6plex [N-Term; K24]; 3xPhospho [S7(100); S8(100); S17(100)]	Q6H7U2 3xPhospho [S257(100); S258(100); S267(98.7)]	1.04623e-10	0	1	1	9	Q6H7U2	Q6H7U2 [251-274]	1	3188.36	High	High	High	High	High	High	High	High	High	S7(Phospho): 100; S8(Phospho): 100; S17(Phospho): 100	1	0.978465	0.942232	1.01541	0.933931	0.93625	1.07485	1.12084	1.12192	9	9	9	9	9	9	9	9	9	Unique	7.59298	High	0	2.687e-12
FALSE	High	[R].GANEEGSSVNEDLNERSPNTAATK.[K]	2xTMT6plex [N-Term; K24]; 2xPhospho [S17(100); S/T]	Q6H7U2 2xPhospho [S267(98.1); S/T]	3.90151e-08	0	1	1	12	Q6H7U2	Q6H7U2 [251-274]	1	3108.39	High	High	High	High	High	High	High	High	High	S7(Phospho): 98.77; S17(Phospho): 99.98	1	1.03937	0.995637	0.954818	0.921867	0.886408	1.11651	1.01903	1.17018	12	12	12	12	12	12	12	12	12	Unique	5.91587	High	0	1.212e-09
FALSE	High	[R].EEDPAAAAGEGDVEDSSVR.[S]	1xTMT6plex [N-Term]; 1xPhospho [S]		1.05434e-05	0	1	1	4	Q18PR9	Q18PR9 [8-26]	0	2212.94	High	High	High	High	High	High	High	High	High	S17(Phospho): 99.28	1	0.95106	0.815393	1.08773	1.07266	0.871748	1.18186	1.17078	1.32821	2	2	2	2	2	2	2	2	2	Unique	4.32818	High	0	8.284e-07
FALSE	High	[K].EAVVGESDDEKEK.[F]	3xTMT6plex [N-Term; K11; K13]; 1xPhospho [S7(100)]	A0A0P0VPT6 1xPhospho [S106(100)]	0.00132742	0	1	1	1	A0A0P0VPT6	A0A0P0VPT6 [100-112]	1	2202.11	High	High	High	High	High	High	High	High	High	S7(Phospho): 100	1	0.9876	1.1158	1.16298	1.10684	1.04864	1.66293	1.28316	1.78543	1	1	1	1	1	1	1	1	1	Unique	2.8943	High	0	0.0002361
FALSE	High	[R].GGNVSDDSEDEKPLAAR.[F]	2xTMT6plex [N-Term; K12]; 1xPhospho [S8(100)]	Q84ZL5 1xPhospho [S214(100)]	5.42272e-06	0	1	1	5	Q84ZL5	Q84ZL5 [207-223]	0	2298.1	High	High	High	High	High	High	High	High	High	S8(Phospho): 100	1	0.909445	0.733377	0.670425	0.62128	0.593219	0.636384	0.675194	0.737092	4	4	4	4	4	4	4	4	4	Unique	3.67235	High	0	3.832e-07
FALSE	High	[K].IQRPEASESSQPSSSPPSQPQEQPEAK.[A]	2xTMT6plex [N-Term; K27]; 1xPhospho [S]		5.65415e-09	0	1	1	70	Q6H660	Q6H660 [195-221]	0	3444.67	High	High	High	High	High	High	High	High	High	S14(Phospho): 99.25	1	1.07185	1.10626	1.02225	0.830384	0.88934	1.26614	1.14101	1.24497	24	24	24	24	24	24	24	24	24	Unique	6.42229	High	0	1.74e-10
FALSE	High	[R].ENSLQVETSPR.[Q]	1xTMT6plex [N-Term]; 1xPhospho [S3(100)]	Q65X46 1xPhospho [S323(100)]	2.53147e-05	0	1	1	12	Q65X46	Q65X46 [321-331]	0	1568.75	High	High	High	High	High	High	High	High	High	S3(Phospho): 100	1	1.0008	0.700952	0.770109	0.713769	0.675312	0.643013	0.704007	0.671948	10	10	10	10	10	10	10	10	10	Unique	4.17301	High	0	2.307e-06
FALSE	High	[K].DNAGSDEEPDEPPAK.[K]	2xTMT6plex [N-Term; K15]; 1xPhospho [S5(100)]	Q5JKH1 1xPhospho [S287(100)]	1.56897e-06	0	1	2	35	Q5JKH1	Q5JKH1 [283-297]	0	2108.94	High	High	High	High	High	High	High	High	High	S5(Phospho): 100	1	1.05459	0.974657	1.06232	0.88266	0.988046	1.13829	1.11604	1.22929	35	35	35	35	35	35	35	35	35	Unique	4.51906	High	0	2.084e-07
FALSE	High	[R].GGGVGVGGANYYVQSPSR.[E]	1xTMT6plex [N-Term]; 1xPhospho [S15(100)]	Q5WA73 1xPhospho [S39(100)]	1.24786e-08	0	1	1	2	Q5WA73	Q5WA73 [25-42]	0	2033.96	High	High	High	High	High	High	High	High	High	S15(Phospho): 100	1	0.98963	0.987054	0.954818	0.888692	0.996842	1.26235	1.24474	1.37767	2	2	2	2	2	2	2	2	2	Unique	5.62376	High	0	3.219e-10
FALSE	High	[R].EYTNSMDGQIVLDDSEEDGDDDDNEDDDEK.[G]	2xTMT6plex [N-Term; K30]; 1xOxidation [M6(100)]; 1xPhospho [S15(100)]	Q0DKN6 1xPhospho [S495(100)]	5.97011e-10	0	1	2	1	Q0DKN6	Q0DKN6 [481-510]	0	3976.55	High	High	High	High	High	High	High	High	High	M6(Oxidation): 100; S15(Phospho): 100	1	1.01805	1.03665	1.06232	1.136	0.996842	1.28413	1.17174	1.34148	1	1	1	1	1	1	1	1	1	Unique	5.59641	High	0	9.297e-12
FALSE	High	[R].VPEMGGGGGSASSGAGADER.[Q]	1xTMT6plex [N-Term]; 2xPhospho [S12(98.8); S13(98.8)]	A0A0P0UYZ1 2xPhospho [S206(98.8); S207(98.8)]	0.000103474	0	1	1	1	A0A0P0UYZ1	A0A0P0UYZ1 [195-214]	0	2137.85	High	High	High	High	High	High	High	High	High	S12(Phospho): 98.8; S13(Phospho): 98.8	1	1.11955	0.987054	0.966546	1.00531	0.904976	1.13545	1.3283	1.12554	1	1	1	1	1	1	1	1	1	Unique	3.10392	High	0	1.191e-05
FALSE	High	[R].SKSIEADEEER.[S]	2xTMT6plex [N-Term; K2]; 2xPhospho [S1(100); S3(100)]	Q7X8Y1 2xPhospho [S25(100); S27(100)]	2.69692e-05	0	1	1	4	Q7X8Y1	Q7X8Y1 [25-35]	1	1910.85	High	High	High	High	High	High	High	High	High	S1(Phospho): 100; S3(Phospho): 100	1	0.950045	1.00231	0.932341	0.987212	0.913772	1.09757	1.17174	1.05678	4	4	4	4	4	4	4	4	4	Unique	4.30469	High	0	2.482e-06
FALSE	High	[K].DKFSSGDEKEDHEK.[Q]	4xTMT6plex [N-Term; K2; K9; K14]; 2xPhospho [S4(100); S5(100)]	Q6H7U2 2xPhospho [S144(100); S145(100)]	0.000271063	0	1	1	11	Q6H7U2	Q6H7U2 [141-154]	2	2727.31	High	High	High	High	High	High	High	High	High	S4(Phospho): 100; S5(Phospho): 100	1	0.91655	0.948907	1.03496	1.0033	1.00759	1.11651	1.1218	1.09418	11	11	11	11	11	11	11	11	11	Unique	4.3118	High	0	3.651e-05
FALSE	High	[K].AGGVGVAPPSPSPSEGK.[A]	2xTMT6plex [N-Term; K17]; 2xPhospho [S10(100); S14(100)]	Q8S5W6 2xPhospho [S81(100); S85(100)]	0.000567409	0	1	2	3	Q8S5W6	Q8S5W6 [72-88]	0	2112.02	High	High	High	High	High	High	High	High	High	S10(Phospho): 99.99; S14(Phospho): 100	1	0.96324	0.798227	0.956773	0.835411	0.955796	0.995297	1.14005	1.20275	2	2	2	2	2	2	2	2	2	Unique	3.13156	High	0	8.678e-05
FALSE	High	[R].SHSPDPQYSDDSSEK.[E]	2xTMT6plex [N-Term; K15]; 1xPhospho [S3(99.7)]	Q5N8F0 1xPhospho [S483(99.7)]	2.66815e-08	0	1	3	2	Q5N8F0	Q5N8F0 [481-495]	0	2216.97	High	High	High	High	High	High	High	High	High	S3(Phospho): 99.66	1	1.23323	0.981332	1.1708	1.09981	1.10337	1.23868	1.34751	1.38732	1	1	1	1	1	1	1	1	1	Unique	5.62315	High	0	7.781e-10
FALSE	High	[K].SASPADSAELGQR.[K]	1xTMT6plex [N-Term]; 3xPhospho [S1(100); S3(100); S7(100)]	Q7XUF4 3xPhospho [S253(100); S255(100); S259(100)]	0.000874059	0	1	1	3	Q7XUF4	Q7XUF4 [253-265]	0	1757.67	High	High	High	High	High	High	High	High	High	S1(Phospho): 100; S3(Phospho): 100; S7(Phospho): 100	1	1.1023	0.988962	1.20598	1.10383	0.985115	1.2775	1.14101	1.31012	3	3	3	3	3	3	3	3	3	Unique	3.66556	High	0	0.0001444
FALSE	High	[K].SASPADSAELGQR.[K]	1xTMT6plex [N-Term]; 2xPhospho [S3(99.3); S7(100)]	Q7XUF4 2xPhospho [S255(100); S259(100)]	0.000455534	0	1	1	2	Q7XUF4	Q7XUF4 [253-265]	0	1677.71	High	High	High	High	High	High	High	High	High	S3(Phospho): 100; S7(Phospho): 100	1	1.25455	1.14823	1.14246	0.830384	0.83852	1.67808	1.32638	1.72752	2	2	2	2	2	2	2	2	2	Unique	2.58327	High	0	6.715e-05
FALSE	High	[K].NNAGEIIGTR.[F]	1xTMT6plex [N-Term]; 1xPhospho [T9(100)]	Q6Z411 1xPhospho [T111(100)]	3.78001e-05	0	1	1	12	Q6Z411	Q6Z411 [103-112]	0	1353.67	High	High	High	High	High	High	High	High	High	T9(Phospho): 100	1	0.791704	0.811578	0.75545	0.730859	1.18546	0.859876	1.11892	1.33183	12	12	12	12	12	12	12	12	12	Unique	4.53361	High	0	4.127e-06
FALSE	High	[R].DSSPVQNFSR.[K]	1xTMT6plex [N-Term]; 1xPhospho [S3(100)]	Q2QNZ9 1xPhospho [S302(99.5)]	0.000397547	0	1	2	8	Q2QNZ9	Q2QNZ9 [300-309]	0	1445.66	High	High	High	High	High	High	High	High	High	S3(Phospho): 100	1	1.06677	0.895502	0.897158	0.675567	0.697789	0.768964	0.749148	0.877031	5	5	5	5	5	5	5	5	5	Unique	3.49907	High	0	6.116e-05
FALSE	High	[R].EKGDSDEEDDDYDK.[R]	3xTMT6plex [N-Term; K2; K14]; 1xPhospho [S5(100)]	Q84L14 1xPhospho [S230(100)]	1.28594e-07	0	1	1	5	Q84L14	Q84L14 [226-239]	1	2427.07	High	High	High	High	High	High	High	High	High	S5(Phospho): 100	1	0.98354	0.883104	1.12975	0.891708	1.04082	1.41766	1.38592	1.4392	5	5	5	5	5	5	5	5	5	Unique	5.44791	High	0	4.887e-09
FALSE	High	[K].RGANEEGSSVNEDLNERSPNTAATK.[K]	2xTMT6plex [N-Term; K25]; 3xPhospho [S8(100); S9(100); S18(100)]	Q6H7U2 3xPhospho [S257(100); S258(100); S267(100)]	0.000100783	0	1	1	1	Q6H7U2	Q6H7U2 [250-274]	2	3344.46	High	High	High	High	High	High	High	High	High	S8(Phospho): 100; S9(Phospho): 100; S18(Phospho): 99.98	1	1.10839	0.782014	1.11314	0.951021	0.814088	1.0275	1.17943	1.46091	1	1	1	1	1	1	1	1	1	Unique	4.05281	High	0	1.154e-05
FALSE	High	[R].GEEGEDTDADDVSDYNYPASGSADQK.[Q]	2xTMT6plex [N-Term; K26]; 1xPhospho [S/Y/T]	Q84ZN6 1xPhospho [S91(98.6)]	6.54406e-08	0	1	1	9	Q84ZN6	Q84ZN6 [79-104]	0	3273.36	High	High	High	High	High	High	High	High	High	S13(Phospho): 100	1	1.17639	1.25122	0.927454	0.869591	0.777928	1.17996	0.973892	1.23894	3	3	3	3	3	3	3	3	3	Unique	4.16849	High	0	2.214e-09
FALSE	High	[K].APAKEEEEDDEEESDKSK.[S]	4xTMT6plex [N-Term; K4; K16; K18]; 2xPhospho [S14(100); S17(100)]	Q5Z7N3 2xPhospho [S133(100); S136(100)]	0.000107362	0	1	1	2	Q5Z7N3	Q5Z7N3 [120-137]	2	3141.46	High	High	High	High	High	High	High	High	High	S14(Phospho): 100; S17(Phospho): 100	1	0.782569	0.792505	0.915727	0.628317	0.633288	0.850406	0.83847	0.927698	2	2	2	2	2	2	2	2	2	Unique	3.67222	High	0	1.242e-05
FALSE	High	[R].HDSEEPKDLSPPR.[R]	2xTMT6plex [N-Term; K7]; 2xPhospho [S3(100); S10(100)]	Q6ZKE8 2xPhospho [S271(100); S278(100)]	0.00025317	0	1	2	11	Q6ZKE8	Q6ZKE8 [269-281]	1	2124.98	High	High	High	High	High	High	High	High	High	S3(Phospho): 100; S10(Phospho): 100	1	1.05358	1.03855	0.998797	1.0234	0.948955	1.21784	1.20248	1.28358	11	11	11	11	11	11	11	11	11	Unique	3.78107	High	0	3.388e-05
FALSE	High	[R].GQSLSDDQPDK.[L]	2xTMT6plex [N-Term; K11]; 2xPhospho [S3(100); S5(100)]	Q5VMK2 2xPhospho [S201(100); S203(100)]	0.000457924	0	1	1	3	Q5VMK2	Q5VMK2 [199-209]	0	1807.79	High	High	High	High	High	High	High	High	High	S3(Phospho): 100; S5(Phospho): 100	1	1.10027	0.929834	1.15419	0.974143	1.07503	1.11651	1.06994	1.18345	3	3	3	3	3	3	3	3	3	Unique	3.60572	High	0	6.756e-05
FALSE	High	[K].VPNDDDEQCGTPK.[G]	2xTMT6plex [N-Term; K13]; 1xCarbamidomethyl [C9]; 1xPhospho [T11(100)]	Q6Z6R6 1xPhospho [T418(100)]	2.94997e-05	0	1	1	3	Q6Z6R6	Q6Z6R6 [408-420]	0	2012.9	High	High	High	High	High	High	High	High	High	T11(Phospho): 100	1	0.99978	0.959398	1.00564	0.977159	0.989024	1.09189	1.33694	1.28961	3	3	3	3	3	3	3	3	3	Unique	3.77071	High	0	2.748e-06
FALSE	High	[R].SASEVNGGGADVVR.[A]	1xTMT6plex [N-Term]; 1xPhospho [S3(99.5)]	Q0IZR7 1xPhospho [S41(100)]	1.19039e-05	0	1	1	10	Q0IZR7	Q0IZR7 [39-52]	0	1626.77	High	High	High	High	High	High	High	High	High	S3(Phospho): 100	1	1.13376	0.931741	1.119	1.05557	1.02323	1.01708	0.976774	1.12675	8	8	8	8	8	8	8	8	8	Unique	4.13351	High	0	2.062e-06
FALSE	High	[K].KSSQDVAEGSSDDESDGETSK.[T]	3xTMT6plex [N-Term; K1; K21]; 2xPhospho [S11(99.5); S15(100)]	Q6AVL0 2xPhospho [S69(99.5); S73(100)]	3.22676e-05	0	1	1	2	Q6AVL0	Q6AVL0 [59-79]	1	3005.31	High	High	High	High	High	High	High	High	High	S11(Phospho): 99.49; S15(Phospho): 100	1	1.29007	1.3113	1.32326	1.41748	1.35746	2.54554	2.24072	2.83979	1	1	1	1	1	1	1	1	1	Unique	2.86586	High	0	3.051e-06
FALSE	High	[K].GQVGEDVRSDSEDEE.[-]	1xTMT6plex [N-Term]; 2xPhospho [S9(100); S11(100)]	Q84QC0 2xPhospho [S278(100); S280(100)]	0.000107362	0	1	1	5	Q84QC0	Q84QC0 [270-284]	1	2039.77	High	High	High	High	High	High	High	High	High	S9(Phospho): 100; S11(Phospho): 100	1	1.03632	0.922204	1.16591	1.44463	1.04766	1.32012	1.08626	1.24015	5	5	5	5	5	5	5	5	5	Unique	3.50506	High	0	1.239e-05
FALSE	High	[K].SMLSGENSEGSDGSK.[S]	2xTMT6plex [N-Term; K15]; 2xPhospho [S8(100); S11(100)]	A0A0P0WHC2 2xPhospho [S45(100); S48(100)]	1.29525e-05	0	1	1	1	A0A0P0WHC2	A0A0P0WHC2 [38-52]	0	2102.88	High	High	High	High	High	High	High	High	High	S8(Phospho): 100; S11(Phospho): 100	1	0.856665	0.956537	0.915727	1.03446	0.948955	0.904385	1.21592	1.1364	1	1	1	1	1	1	1	1	1	Unique	4.05846	High	0	1.056e-06
FALSE	High	[R].EDDDDTDEDEDDEEEEQK.[M]	2xTMT6plex [N-Term; K18]; 1xPhospho [T6(100)]	Q6Z3Y9 1xPhospho [T314(100)]	9.92448e-11	0	1	1	15	Q6Z3Y9	Q6Z3Y9 [309-326]	0	2738.02	High	High	High	High	High	High	High	High	High	T6(Phospho): 100	1	0.88001	0.952722	1.03398	0.783135	0.987069	0.926166	0.913384	1.02903	15	15	15	15	15	15	15	15	15	Unique	7.08151	High	0	1.147e-12
FALSE	High	[R].ENSLQVETSPR.[Q]	1xTMT6plex [N-Term]; 2xPhospho [S3(100); T8(99.2)]	Q65X46 2xPhospho [S323(100); T328(99.5)]	0.000381226	0	1	1	4	Q65X46	Q65X46 [321-331]	0	1648.72	High	High	High	High	High	High	High	High	High	S3(Phospho): 100; T8(Phospho): 99.47	1	1.05459	0.884057	0.834611	0.832395	0.860021	0.95647	0.993101	0.956651	4	4	4	4	4	4	4	4	4	Unique	3.79663	High	0	5.458e-05
FALSE	High	[R].SSSSSTAVAASSAPSSSFSK.[Q]	2xTMT6plex [N-Term; K20]; 1xPhospho [S17(100)]	B9FA98 1xPhospho [S52(100)]	1.8538e-08	0	1	1	2	B9FA98	B9FA98 [36-55]	0	2371.14	High	High	High	High	High	High	High	High	High	S17(Phospho): 99.99	1	0.868845	0.822068	0.823861	0.808268	0.758382	1.06159	1.02672	1.05557	2	2	2	2	2	2	2	2	2	Unique	5.51399	High	0	5.112e-10
FALSE	High	[R].SSDDAAVGFQGK.[R]	2xTMT6plex [N-Term; K12]; 1xPhospho [S2(99.6)]	Q6AT41 1xPhospho [S193(99.6)]	9.86812e-05	0	1	2	2	Q6AT41	Q6AT41 [192-203]	0	1719.84	High	High	High	High	High	High	High	High	High	S2(Phospho): 99.58	1	0.95512	0.876428	0.837543	1.01737	1.01639	0.870293	0.948921	0.741917	1	1	1	1	1	1	1	1	1	Unique	3.4693	High	0	1.122e-05
FALSE	High	[R].LQSFEEEHK.[N]	2xTMT6plex [N-Term; K9]; 1xPhospho [S3(100)]	Q652G4 1xPhospho [S367(100)]	0.000892373	0	1	1	2	Q652G4	Q652G4 [365-373]	0	1684.83	High	High	High	High	High	High	High	High	High	S3(Phospho): 100	1	1.06576	1.08528	1.06818	0.939963	0.896181	0.773699	0.79717	0.601978	2	2	2	2	2	2	2	2	2	Unique	3.40977	High	0	0.0001483
FALSE	High	[K].NKEESISEEEEEPENA.[-]	2xTMT6plex [N-Term; K2]; 1xPhospho [S7(100)]	Q8LQM2 1xPhospho [S425(100)]	0.000123773	0	1	1	2	Q8LQM2	Q8LQM2 [419-434]	1	2401.07	High	High	High	High	High	High	High	High	High	S7(Phospho): 100	1	0.980495	0.802995	1.01443	0.967106	0.859043	1.18375	1.1122	1.175	2	2	2	2	2	2	2	2	2	Unique	3.5939	High	0	1.47e-05
FALSE	High	[R].EYSDEEMDSDEEQQR.[Y]	1xTMT6plex [N-Term]; 2xPhospho [S3(100); S9(100)]	Q0DFV9 2xPhospho [S441(100); S447(100)]	4.71029e-07	0	1	1	8	Q0DFV9	Q0DFV9 [439-453]	0	2278.79	High	High	High	High	High	High	High	High	High	S3(Phospho): 100; S9(Phospho): 100	1	1.02313	0.956537	0.935272	0.825358	0.967523	1.24815	1.06994	1.38129	5	5	5	5	5	5	5	5	5	Unique	4.53673	High	0	9.002e-07
FALSE	High	[R].EYSDEEMDSDEEQQR.[Y]	1xTMT6plex [N-Term]; 1xPhospho [S9(100)]	Q0DFV9 1xPhospho [S447(100)]	0.000674002	0	1	1	3	Q0DFV9	Q0DFV9 [439-453]	0	2198.83	High	High	High	High	High	High	High	High	High	S9(Phospho): 100	1	1.23932	1.01566	1.26658	1.12393	1.21185	1.55971	1.23513	1.82765	2	2	2	2	2	2	2	2	2	Unique	2.75869	High	0	0.0001067
FALSE	High	[K].RSSPMPAPSTDSPAADQSPGR.[G]	1xTMT6plex [N-Term]; 3xPhospho [S12(100); S18(100); S/T]	Q93W00 3xPhospho [S36(100); S42(100); S/T]	1.14118e-05	0	1	1	9	Q93W00	Q93W00 [25-45]	1	2581.04	High	High	High	High	High	High	High	High	High	S2(Phospho): 50; S3(Phospho): 50; S12(Phospho): 100; S18(Phospho): 100	1	1.0617	1.01471	0.954818	0.852501	0.83852	1.32106	1.31197	1.60447	4	4	4	4	4	4	4	4	4	Unique	5.00206	High	0	9.108e-07
FALSE	High	[K].RASISPSISPVHQK.[T]	2xTMT6plex [N-Term; K14]; 3xPhospho [S3(100); S5(100); S9(98.5)]	A0A0P0WY39 3xPhospho [S141(100); S143(100); S147(98.5)]	0.000505782	0	1	1	2	A0A0P0WY39	A0A0P0WY39 [139-152]	1	2205.06	High	High	High	High	High	High	High	High	High	S3(Phospho): 100; S5(Phospho): 100; S7(Phospho): 50; S9(Phospho): 50	1	1.11042	0.942232	1.11119	1.05155	0.990978	1.17428	1.06898	0.96027	2	2	2	2	2	2	2	2	2	Unique	3.51637	High	0	7.579e-05
FALSE	High	[K].QQLLQGQGSLDNASHEK.[E]	2xTMT6plex [N-Term; K17]; 1xPhospho [S9(100)]	Q10CW7 1xPhospho [S610(100)]	1.50411e-06	0	1	2	3	Q10CW7	Q10CW7 [602-618]	0	2391.21	High	High	High	High	High	High	High	High	High	S9(Phospho): 100	1	1.07388	0.932695	1.12389	1.0425	0.932341	1.07958	1.20344	1.09418	3	3	3	3	3	3	3	3	3	Unique	4.57568	High	0	8.582e-08
FALSE	High	[K].ELSGQDAVSAEGDDEK.[F]	2xTMT6plex [N-Term; K16]; 1xPhospho [S9(100)]	Q6K700 1xPhospho [S95(100)]	1.80264e-07	0	1	1	2	Q6K700	Q6K700 [87-102]	0	2188.01	High	High	High	High	High	High	High	High	High	S9(Phospho): 100	1	1.16827	0.943185	1.26951	1.01436	1.01248	1.44512	1.26683	1.64669	2	2	2	2	2	2	2	2	2	Unique	4.43634	High	0	7.217e-09
FALSE	High	[K].AVAAAAAAASPSTSRGSAGGR.[G]	1xTMT6plex [N-Term]; 3xPhospho [S10(100); S/T]	Q84RS4 3xPhospho [S45(100); S/T]	2.46557e-05	0	1	1	5	Q84RS4	Q84RS4 [36-56]	1	2255.98	High	High	High	High	High	High	High	High	High	S10(Phospho): 100; S14(Phospho): 97.5; S17(Phospho): 99.95	1	1.07286	1.02616	1.13366	1.08473	1.11021	1.28413	1.28124	1.50072	4	4	4	4	4	4	4	4	4	Unique	3.00823	High	0	2.233e-06
FALSE	High	[R].SDDGSCLYTF.[-]	1xTMT6plex [N-Term]; 1xCarbamidomethyl [C6]; 1xPhospho [S1(100)]	P93431 1xPhospho [S457(100)]	0.000646477	0	1	1	2	P93431	P93431 [457-466]	0	1473.58	High	High	High	High	High	High	High	High	High	S1(Phospho): 100	1	1.1226	0.865938	0.809201	0.790172	0.670425	0.784116	0.733781	0.814299	2	2	2	2	2	2	2	2	2	Unique	2.69847	High	0	0.0001014
FALSE	High	[R].SSNSSQNDDSPLK.[G]	2xTMT6plex [N-Term; K13]; 1xPhospho [S]		2.32655e-05	0	1	2	11	Q0JBZ3	Q0JBZ3 [702-714]	0	1916.9	High	High	High	High	High	High	High	High	High	S4(Phospho): 99.62	1	0.988615	0.954629	0.958728	0.955042	0.919636	1.33716	1.22649	1.31736	6	6	6	6	6	6	6	6	6	Unique	4.07457	High	0	2.087e-06
FALSE	High	[K].QEQTEDEDEQQEQIEDEDEQQESPR.[G]	1xTMT6plex [N-Term]; 1xPhospho [S23(100)]	Q7XUK7 1xPhospho [S580(100)]	4.70258e-06	0	1	1	1	Q7XUK7	Q7XUK7 [558-582]	0	3400.37	High	High	High	High	High	High	High	High	High	S23(Phospho): 100	1	1.09722	0.857354	1.17471	1.44161	1.2138	1.20553	1.28988	1.85178	1	1	1	1	1	1	1	1	1	Unique	3.97779	High	0	3.231e-07
FALSE	High	[R].GANEEGSSVNEDLNER.[S]	1xTMT6plex [N-Term]; 2xPhospho [S7(100); S8(100)]	Q6H7U2 2xPhospho [S257(100); S258(100)]	9.17348e-08	0	1	1	9	Q6H7U2	Q6H7U2 [251-266]	0	2108.84	High	High	High	High	High	High	High	High	High	S7(Phospho): 100; S8(Phospho): 100	1	0.947	0.869752	1.02616	0.908798	0.88934	1.23584	1.05265	1.24256	9	9	9	9	9	9	9	9	9	Unique	4.8908	High	0	3.781e-09
FALSE	High	[K].RVSSGNLVDVAR.[Q]	1xTMT6plex [N-Term]; 2xPhospho [S3(100); S4(100)]	Q33B74 2xPhospho [S181(100); S182(100)]	5.76402e-05	0	1	1	4	Q33B74	Q33B74 [179-190]	1	1661.8	High	High	High	High	High	High	High	High	High	S3(Phospho): 100; S4(Phospho): 100	1	1.21496	1.02711	1.04375	1.0033	0.906931	1.38735	1.25915	1.15811	4	4	4	4	4	4	4	4	4	Unique	3.65983	High	0	5.99e-06
FALSE	High	[K].EAIPTTATTTATASEEK.[M]	2xTMT6plex [N-Term; K17]; 1xPhospho [S14(100)]	Q7EZR6 1xPhospho [S613(100)]	0.000130467	0	1	1	1	Q7EZR6	Q7EZR6 [600-616]	0	2260.14	High	High	High	High	High	High	High	High	High	S14(Phospho): 100	1	1.02414	0.984193	1.13464	0.770066	0.842429	0.977304	1.04016	1.08453	1	1	1	1	1	1	1	1	1	Unique	3.176	High	0	1.554e-05
FALSE	High	[R].NCTVTGVEMFQK.[T]	2xTMT6plex [N-Term; K12]; 1xCarbamidomethyl [C2]; 1xPhospho [T3(100)]	Q6ZI53 1xPhospho [T323(100)]	0.000189594	0	1	1	3	Q6ZI53	Q6ZI53 [321-332]	0	1951.94	High	High	High	High	High	High	High	High	High	T3(Phospho): 100	1	0.878995	1.02425	1.31446	1.52003	1.47767	1.894	2.0179	1.87349	3	3	3	3	3	3	3	3	3	Unique	3.46007	High	0	2.412e-05
FALSE	High	[R].GAAAMDVDSGPASD.[-]	1xTMT6plex [N-Term]; 1xPhospho [S13(100)]	Q65WY8 1xPhospho [S639(100)]	0.00017613	0	1	1	1	Q65WY8	Q65WY8 [627-640]	0	1572.65	High	High	High	High	High	High	High	High	High	S13(Phospho): 100	1	1.30124	0.926973	0.932341	0.658477	0.62547	0.938477	1.02288	0.926492	1	1	1	1	1	1	1	1	1	Unique	3.11446	High	0	2.214e-05
FALSE	High	[R].GAAAMDVDSGPASD.[-]	1xTMT6plex [N-Term]; 2xPhospho [S9(100); S13(100)]	Q65WY8 2xPhospho [S635(100); S639(100)]	7.99245e-05	0	1	1	2	Q65WY8	Q65WY8 [627-640]	0	1652.61	High	High	High	High	High	High	High	High	High	S9(Phospho): 100; S13(Phospho): 100	1	1.0211	1.04427	1.00075	1.05356	1.03202	1.49342	1.3331	1.56466	2	2	2	2	2	2	2	2	2	Unique	3.65939	High	0	8.809e-06
FALSE	High	[K].AILEGGSDDEGASTEAHGR.[A]	1xTMT6plex [N-Term]; 1xPhospho [S7(100)]	Q0DP22 1xPhospho [S454(100)]	5.93586e-13	0	1	1	10	Q0DP22	Q0DP22 [448-466]	0	2180.97	High	High	High	High	High	High	High	High	High	S7(Phospho): 100	1	1.03835	0.821115	1.03202	0.997265	0.892271	1.33054	1.32638	1.45368	10	10	10	10	10	10	10	10	10	Unique	7.84015	High	0	2.954e-15
FALSE	High	[R].TSSEDNPQQQQSAAAIPR.[V]	1xTMT6plex [N-Term]; 1xPhospho [S/T]	Q2QYY8 1xPhospho [S106(98.7)]	1.13296e-07	0	1	3	9	Q2QYY8	Q2QYY8 [105-122]	0	2237.04	High	High	High	High	High	High	High	High	High	S2(Phospho): 98.82	1	1.13173	1.02425	1.65261	1.24457	1.4034	1.3116	1.19383	1.32339	4	4	4	4	4	4	4	4	4	Unique	5.0637	High	0	4.2e-09
FALSE	High	[R].SGSDNLDGASGDELDPDNSNPR.[K]	1xTMT6plex [N-Term]; 1xPhospho [S10(100)]	Q7Y0V7 1xPhospho [S108(100)]	9.56099e-05	0	1	1	2	Q7Y0V7	Q7Y0V7 [99-120]	0	2541.06	High	High	High	High	High	High	High	High	High	S10(Phospho): 100	1	1.07794	0.981332	1.13562	1.13097	1.11412	1.59475	1.53863	1.77457	2	2	2	2	2	2	2	2	2	Unique	2.69547	High	0	1.087e-05
FALSE	High	[K].IDGTSGLESDDDDDKEK.[A]	3xTMT6plex [N-Term; K15; K17]; 1xPhospho [S9(100)]	Q6Z343 1xPhospho [S285(100)]	5.8791e-07	0	1	1	2	Q6Z343	Q6Z343 [277-293]	1	2606.23	High	High	High	High	High	High	High	High	High	S9(Phospho): 100	1	1.0008	0.894548	0.956773	0.641386	0.799428	0.978251	1.00655	1.0604	2	2	2	2	2	2	2	2	2	Unique	4.58054	High	0	2.864e-08
FALSE	High	[K].ETTTGSLSPK.[I]	2xTMT6plex [N-Term; K10]; 2xPhospho [T4(99.1); S8(100)]	Q6ZA53 2xPhospho [S203(100); S205(100)]	2.43969e-05	0	1	1	10	Q6ZA53	Q6ZA53 [198-207]	0	1638.78	High	High	High	High	High	High	High	High	High	S6(Phospho): 100; S8(Phospho): 100	1	1.06068	1.04714	1.07503	1.00631	1.10239	1.16007	1.12084	1.20396	10	10	10	10	10	10	10	10	10	Unique	4.48122	High	0	6.63e-06
FALSE	High	[K].ETTTGSLSPK.[I]	2xTMT6plex [N-Term; K10]; 1xPhospho [S8(100)]	Q6ZA53 1xPhospho [S205(100)]	0.00186807	0	1	1	2	Q6ZA53	Q6ZA53 [198-207]	0	1558.81	High	High	High	High	High	High	High	High	High	S8(Phospho): 100	1	0.86783	0.999452	0.926477	0.775092	0.909863	1.07295	1.06994	1.23532	2	2	2	2	2	2	2	2	2	Unique	2.61461	High	0	0.0003618
FALSE	High	[R].SPSPPPPPPPPR.[K]	1xTMT6plex [N-Term]; 2xPhospho [S1(100); S3(100)]	Q65XI3 2xPhospho [S46(100); S48(100)]	0.00136189	0	1	1	1	Q65XI3	Q65XI3 [46-57]	0	1611.75	High	High	High	High	High	High	High	High	High	S1(Phospho): 100; S3(Phospho): 100	1	0.90031	1.00136	0.892271	0.824352	1.07698	1.60327	1.19864	2.07013	1	1	1	1	1	1	1	1	1	Unique	2.55509	High	0	0.0002444
FALSE	High	[K].VRSPAVSAASKEEPK.[R]	3xTMT6plex [N-Term; K11; K15]; 3xPhospho [S3(100); S7(100); S10(100)]	Q0IXI6 3xPhospho [S389(100); S393(100); S396(100)]	0.000633133	0	1	1	11	Q0IXI6	Q0IXI6 [387-401]	2	2483.23	High	High	High	High	High	High	High	High	High	S3(Phospho): 100; S7(Phospho): 100; S10(Phospho): 100	1	1.00689	1.06526	1.04766	0.878639	0.949932	1.3561	1.20824	1.33424	11	11	11	11	11	11	11	11	11	Unique	4.16981	High	0	0.0001168
FALSE	High	[R].GAYDESDNEDIDR.[A]	1xTMT6plex [N-Term]; 1xPhospho [S6(100)]	Q2QMP4 1xPhospho [S40(100)]	1.32988e-05	0	1	1	5	Q2QMP4	Q2QMP4 [35-47]	0	1807.72	High	High	High	High	High	High	High	High	High	S6(Phospho): 100	1	1.06271	1.08147	1.22846	1.15409	1.0848	1.39398	1.38688	1.5152	5	5	5	5	5	5	5	5	5	Unique	4.01447	High	0	1.085e-06
FALSE	High	[K].EVATTEISE.[-]	1xTMT6plex [N-Term]; 1xPhospho [S8(100)]	Q6K2F0 1xPhospho [S733(100)]	0.000126408	0	1	1	5	Q6K2F0	Q6K2F0 [726-734]	0	1287.59	High	High	High	High	High	High	High	High	High	S8(Phospho): 100	1	1.04546	0.967981	1.14344	1.11288	1.08773	1.19227	1.17655	1.22446	5	5	5	5	5	5	5	5	5	Unique	3.50215	High	0	1.504e-05
FALSE	High	[K].AEEQQQPSPDSPIK.[V]	2xTMT6plex [N-Term; K14]; 1xPhospho [S11(100)]	A0A0P0VVJ6 1xPhospho [S454(100)]	1.20703e-07	0	1	2	3	A0A0P0VVJ6	A0A0P0VVJ6 [444-457]	0	2092.04	High	High	High	High	High	High	High	High	High	S11(Phospho): 100	1	1.13579	1.10912	1.02323	0.975149	1.20598	1.03791	1.13909	1.27996	3	3	3	3	3	3	3	3	3	Unique	5.02442	High	0	4.541e-09
FALSE	High	[K].KYIHPEEQESEDDEDSEE.[-]	2xTMT6plex [N-Term; K1]; 1xPhospho [S10(100)]	Q656E2 1xPhospho [S437(100)]	0.000159368	0	1	1	2	Q656E2	Q656E2 [428-445]	1	2746.17	High	High	High	High	High	High	High	High	High	S10(Phospho): 100	1	1.13884	1.2331	1.19426	1.18526	0.927454	1.94987	1.30333	2.01222	2	2	2	2	2	2	2	2	2	Unique	3.88987	High	0	1.963e-05
FALSE	High	[K].DEEGSGDDEGEEEEDDHDNTLCGTCGTNDGK.[D]	2xTMT6plex [N-Term; K31]; 2xCarbamidomethyl [C22; C25]; 1xPhospho [S5(100)]	Q7F2Z1 1xPhospho [S202(100)]	2.2381e-07	0	1	2	3	Q7F2Z1	Q7F2Z1 [198-228]	0	3924.49	High	High	High	High	High	High	High	High	High	S5(Phospho): 100	1	1.14899	0.948907	1.20305	0.886682	1.06134	1.33054	1.44451	1.62619	3	3	3	3	3	3	3	3	3	Unique	5.24769	High	0	9.299e-09
FALSE	High	[R].EEDPAAAAGEGDVEDSSVRSSER.[G]	1xTMT6plex [N-Term]; 2xPhospho [S20(99.1); S]		3.62382e-05	0	1	1	3	Q18PR9	Q18PR9 [8-30]	1	2752.12	High	High	High	High	High	High	High	High	High	S16(Phospho): 50; S17(Phospho): 50; S20(Phospho): 99.06	1	1.16421	1.10245	1.12389	1.14002	0.977296	1.7046	1.2918	1.57431	3	3	3	3	3	3	3	3	3	Unique	3.78802	High	0	3.486e-06
FALSE	High	[R].DGESVVAASASSPSK.[K]	2xTMT6plex [N-Term; K15]; 1xPhospho [S12(100)]	Q7XUF4 1xPhospho [S132(100)]	1.06172e-06	0	1	1	10	Q7XUF4	Q7XUF4 [121-135]	0	1929.96	High	High	High	High	High	High	High	High	High	S12(Phospho): 100	1	1.04241	0.741006	0.82777	0.919857	0.743722	0.925219	0.897057	1.12192	9	9	9	9	9	9	9	9	9	Unique	4.58402	High	0	5.724e-08
FALSE	High	[K].ETPAKEGESSDEEETPAK.[V]	3xTMT6plex [N-Term; K5; K18]; 2xPhospho [S9(100); S10(100)]	B7EPQ1 2xPhospho [S223(100); S224(100)]	0.000167982	0	1	2	2	B7EPQ1	B7EPQ1 [215-232]	1	2781.27	High	High	High	High	High	High	High	High	High	S9(Phospho): 100; S10(Phospho): 100	1	1.05865	0.956537	0.822883	0.821337	1.05939	1.05306	1.12948	1.06643	2	2	2	2	2	2	2	2	2	Unique	4.11664	High	0	2.098e-05
FALSE	High	[R].AKNPDLNQAPSPENSDAE.[-]	2xTMT6plex [N-Term; K2]; 2xPhospho [S11(100); S15(100)]	Q7XTV6 2xPhospho [S226(100); S230(100)]	5.77722e-06	0	1	1	5	Q7XTV6	Q7XTV6 [216-233]	1	2515.12	High	High	High	High	High	High	High	High	High	S11(Phospho): 100; S15(Phospho): 100	1	1.12057	1.22547	1.22748	1.15208	1.27928	1.48205	1.28988	1.40663	5	5	5	5	5	5	5	5	5	Unique	4.19035	High	0	4.116e-07
FALSE	High	[K].DQEGGQPAGPEVVADDEVTSHR.[F]	1xTMT6plex [N-Term]; 1xPhospho [S20(99.4)]		1.04791e-11	0	1	2	20	Q10RS7	Q10RS7 [212-233]	0	2602.16	High	High	High	High	High	High	High	High	High	S20(Phospho): 99.49	1	1.0891	0.976564	1.08284	1.03748	0.98316	1.50573	1.39937	1.75768	10	10	10	10	10	10	10	10	10	Unique	6.71342	High	0	8.347e-14
FALSE	High	[K].EDSEGVSGGGTEDGGGAK.[S]	2xTMT6plex [N-Term; K18]; 1xPhospho [S7(100)]	A0A0P0XZL7 1xPhospho [S218(100)]	4.95741e-06	0	1	1	1	A0A0P0XZL7	A0A0P0XZL7 [212-229]	0	2146.95	High	High	High	High	High	High	High	High	High	S7(Phospho): 100	1	1.03328	0.736238	0.674334	0.819326	0.848293	0.997191	1.21496	1.35596	1	1	1	1	1	1	1	1	1	Unique	4.23268	High	0	3.45e-07
FALSE	High	[R].QLSPTDGEDQASGK.[K]	2xTMT6plex [N-Term; K14]; 1xPhospho [S3(100)]	Q6ZJC9 1xPhospho [S192(100)]	3.46827e-07	0	1	1	9	Q6ZJC9	Q6ZJC9 [190-203]	0	1970.95	High	High	High	High	High	High	High	High	High	S3(Phospho): 100	1	1.13884	1.05381	1.01443	0.934936	0.943091	1.29266	1.2553	1.3825	8	8	8	8	8	8	8	8	8	Unique	5.73652	High	0	1.555e-08
FALSE	High	[R].SSGGAGFDDDDGVAAR.[R]	1xTMT6plex [N-Term]; 1xPhospho [S1(100)]	Q69JI7 1xPhospho [S170(100)]	0.00162031	0	1	1	4	Q69JI7	Q69JI7 [170-185]	0	1805.75	High	High	High	High	High	High	High	High	High	S1(Phospho): 100	1	1.00283	0.932695	0.872725	0.725832	0.753495	1.06822	0.970051	1.17621	2	2	2	2	2	2	2	2	2	Unique	2.74302	High	0	0.0002991
FALSE	High	[R].LIKSNSQSPTSGSR.[K]	2xTMT6plex [N-Term; K3]; 2xPhospho [S4(100); S8(98.8)]	Q5TKI6 2xPhospho [S593(100); S597(98.8)]	0.000166223	0	1	1	6	Q5TKI6	Q5TKI6 [590-603]	1	2080.02	High	High	High	High	High	High	High	High	High	S4(Phospho): 100; S8(Phospho): 98.27	1	0.94903	1.01376	0.870771	0.951021	0.808224	0.976357	0.955644	0.961476	5	5	5	5	5	5	5	5	5	Unique	3.85956	High	0	2.07e-05
FALSE	High	[K].EPHDQQSEDSDQEELDR.[F]	1xTMT6plex [N-Term]; 2xPhospho [S7(100); S10(100)]	Q6AUH9 2xPhospho [S331(100); S334(100)]	0.000153602	0	1	1	1	Q6AUH9	Q6AUH9 [325-341]	0	2445.93	High	High	High	High	High	High	High	High	High	S7(Phospho): 100; S10(Phospho): 100	1	0.810989	0.850679	1.08969	1.03446	0.88543	1.51236	1.60298	2.36931	1	1	1	1	1	1	1	1	1	Unique	2.8976	High	0	1.887e-05
FALSE	High	[R].HNACGGGGGDGESPPSPLPSR.[F]	1xTMT6plex [N-Term]; 1xCarbamidomethyl [C4]; 1xPhospho [S13(100)]	Q5JN42 1xPhospho [S20(100)]	1.86745e-06	0	1	1	2	Q5JN42	Q5JN42 [8-28]	0	2315.01	High	High	High	High	High	High	High	High	High	S13(Phospho): 100	1	0.927715	1.01757	1.01932	0.933931	0.930386	1.19701	1.12276	1.42834	2	2	2	2	2	2	2	2	2	Unique	4.20942	High	0	3.269e-07
FALSE	High	[R].GAAPQAEASPASVR.[T]	1xTMT6plex [N-Term]; 2xPhospho [S9(100); S12(100)]	Q7XF95 2xPhospho [S195(100); S198(100)]	1.77766e-05	0	1	1	1	Q7XF95	Q7XF95 [187-200]	0	1700.76	High	High	High	High	High	High	High	High	High	S9(Phospho): 100; S12(Phospho): 100	1	0.94294	1.09005	1.10141	0.960069	0.920613	1.21784	1.04112	1.19431	1	1	1	1	1	1	1	1	1	Unique	3.67986	High	0	1.526e-06
FALSE	High	[R].TTVNSDMEEQK.[S]	2xTMT6plex [N-Term; K11]; 1xPhospho [S5(100)]	Q6K6X2 1xPhospho [S278(100)]	0.000410242	0	1	1	3	Q6K6X2	Q6K6X2 [274-284]	0	1819.85	High	High	High	High	High	High	High	High	High	S5(Phospho): 100	1	1.11955	1.12629	1.16396	1.03145	1.04082	1.56729	1.52999	1.51761	3	3	3	3	3	3	3	3	3	Unique	3.79923	High	0	5.952e-05
FALSE	High	[R].HSGSDPDMVK.[I]	2xTMT6plex [N-Term; K10]; 2xPhospho [S2(100); S4(100)]	Q0DP45 2xPhospho [S429(100); S431(100)]	0.000573366	0	1	2	1	Q0DP45	Q0DP45 [428-437]	0	1690.73	High	High	High	High	High	High	High	High	High	S2(Phospho): 100; S4(Phospho): 100	1	0.982525	0.698091	0.82777	0.547893	0.733949	0.70078	0.803894	0.690043	1	1	1	1	1	1	1	1	1	Unique	3.61648	High	0	8.805e-05
FALSE	High	[K].KGATDSDSEVDFDR.[K]	2xTMT6plex [N-Term; K1]; 2xPhospho [T4(100); S]	Q6Z3Y5 2xPhospho [T260(100); S264(100)]	2.65457e-05	0	1	2	8	Q6Z3Y5	Q6Z3Y5 [257-270]	1	2159.93	High	High	High	High	High	High	High	High	High	T4(Phospho): 100; S6(Phospho): 100	1	0.86986	0.861169	0.767178	0.873613	0.899112	0.870293	0.916266	1.16173	7	7	7	7	7	7	7	7	7	Unique	3.98052	High	0	2.44e-06
FALSE	High	[R].KRPTAPAGSDDDDEDGSGAIAAAR.[A]	2xTMT6plex [N-Term; K1]; 1xPhospho [S9(100)]	Q6K4V3 1xPhospho [S39(100)]	0.00070268	0	1	1	2	Q6K4V3	Q6K4V3 [31-54]	1	2881.37	High	High	High	High	High	High	High	High	High	S9(Phospho): 100	1	0.937865	0.827791	1.0418	0.997265	1.06037	1.40156	1.31485	1.71304	2	2	2	2	2	2	2	2	2	Unique	3.46812	High	0	0.000112
FALSE	High	[R].ELSPETDDGDNK.[L]	2xTMT6plex [N-Term; K12]; 2xPhospho [S3(100); T6(100)]	Q0JBZ3 2xPhospho [S418(100); T421(100)]	2.67364e-06	0	1	2	16	Q0JBZ3	Q0JBZ3 [416-427]	0	1937.82	High	High	High	High	High	High	High	High	High	S3(Phospho): 100; T6(Phospho): 100	1	0.94497	0.844003	0.947	0.870597	0.934295	1.06632	1.08626	1.24015	16	16	16	16	16	16	16	16	16	Unique	5.27489	High	0	1.678e-07
FALSE	High	[R].ELSPETDDGDNK.[L]	2xTMT6plex [N-Term; K12]; 1xPhospho [S3(100)]	Q0JBZ3 1xPhospho [S418(100)]	1.79652e-05	0	1	2	14	Q0JBZ3	Q0JBZ3 [416-427]	0	1857.85	High	High	High	High	High	High	High	High	High	S3(Phospho): 100	1	1.03226	0.942232	0.953841	0.829379	0.872725	1.06537	1.02768	1.20396	14	14	14	14	14	14	14	14	14	Unique	4.56816	High	0	4.256e-06
FALSE	High	[R].RSCSPLSQSLSSGR.[Q]	1xTMT6plex [N-Term]; 1xCarbamidomethyl [C3]; 2xPhospho [S2(100); S4(98)]	Q10Q04 2xPhospho [S388(100); S390(100)]	0.0007961	0	1	1	2	Q10Q04	Q10Q04 [387-400]	1	1910.84	High	High	High	High	High	High	High	High	High	S2(Phospho): 100; S4(Phospho): 100	1	0.982525	1.09291	1.13562	1.09981	0.948955	1.23678	1.08146	1.07005	2	2	2	2	2	2	2	2	2	Unique	3.37694	High	0	0.0001488
FALSE	High	[R].KQPQPPPEQPNEDSSNGSDLDEK.[G]	3xTMT6plex [N-Term; K1; K23]; 1xPhospho [S18(98.9)]	Q67U60 1xPhospho [S25(100)]	5.35383e-05	0	1	1	3	Q67U60	Q67U60 [8-30]	1	3303.6	High	High	High	High	High	High	High	High	High	S18(Phospho): 99.99	1	1.11854	1.07575	0.90009	1.0415	1.18448	1.41292	1.09011	1.44041	2	2	2	2	2	2	2	2	2	Unique	3.85505	High	0	5.503e-06
FALSE	High	[R].VMQNDAAGMDSEDEAYQQRPVASR.[R]	1xTMT6plex [N-Term]; 1xOxidation [M2(100)]; 1xPhospho [S11(100)]	Q2QN51 1xPhospho [S148(100)]	9.56099e-05	0	1	1	6	Q2QN51	Q2QN51 [138-161]	0	2993.3	High	High	High	High	High	High	High	High	High	M2(Oxidation): 100; S11(Phospho): 100	1	1.06373	1.00327	1.03202	1.08573	0.969478	1.37694	1.26491	1.48263	6	6	6	6	6	6	6	6	6	Unique	4.1398	High	0	1.117e-05
FALSE	High	[R].VMQNDAAGMDSEDEAYQQRPVASR.[R]	1xTMT6plex [N-Term]; 1xPhospho [S11(100)]	Q2QN51 1xPhospho [S148(100)]	4.33583e-08	0	1	1	5	Q2QN51	Q2QN51 [138-161]	0	2977.3	High	High	High	High	High	High	High	High	High	S11(Phospho): 100	1	0.988615	0.945093	1.12291	0.960069	1.01834	1.2311	1.17463	1.31977	5	5	5	5	5	5	5	5	5	Unique	5.68618	High	0	1.45e-08
FALSE	High	[K].SNVQETEEVCGENSSEK.[T]	2xTMT6plex [N-Term; K17]; 1xCarbamidomethyl [C10]; 1xPhospho [S1(100)]	A0A0P0VJP8 1xPhospho [S462(100)]	0.000817044	0	1	2	3	A0A0P0VJP8	A0A0P0VJP8 [462-478]	0	2464.1	High	High	High	High	High	High	High	High	High	S1(Phospho): 100	1	1.25353	1.07765	1.04668	0.885676	0.772064	1.2633	1.08338	1.38009	3	3	3	3	3	3	3	3	3	Unique	3.22586	High	0	0.0001336
FALSE	High	[K].SSGTDSGEENLSK.[K]	2xTMT6plex [N-Term; K13]; 2xPhospho [S6(100); S/T]	Q5N6Y9 2xPhospho [S57(99.6); S/T]	0.000177994	0	1	1	5	Q5N6Y9	Q5N6Y9 [52-64]	0	1928.83	High	High	High	High	High	High	High	High	High	S2(Phospho): 50; T4(Phospho): 50; S6(Phospho): 99.61	1	0.984555	0.891687	0.915727	0.906788	0.837543	1.21311	1.12084	1.19551	4	4	4	4	4	4	4	4	4	Unique	3.61738	High	0	2.242e-05
FALSE	High	[R].IAPNTQFAGPSNRPASQEGR.[S]	1xTMT6plex [N-Term]; 1xPhospho [S16(100)]	B9FXV5 1xPhospho [S1589(100)]	1.60503e-07	0	1	3	9	B9FXV5	B9FXV5 [1574-1593]	0	2407.17	High	High	High	High	High	High	High	High	High	S16(Phospho): 100	1	1.14594	1.06812	1.02421	0.826363	0.904976	1.21027	1.10451	1.31736	9	9	9	9	9	9	9	9	9	Unique	4.69989	High	0	6.303e-09
FALSE	High	[K].LASQNSGHWK.[Y]	2xTMT6plex [N-Term; K10]; 1xPhospho [S6(100)]	Q69K57 1xPhospho [S319(100)]	0.000258546	0	1	3	3	Q69K57	Q69K57 [314-323]	0	1665.85	High	High	High	High	High	High	High	High	High	S6(Phospho): 100	1	1.16117	0.805856	1.01346	0.995255	0.801383	0.932795	1.06994	0.902364	3	3	3	3	3	3	3	3	3	Unique	3.49226	High	0	3.472e-05
FALSE	High	[R].HVESMSELPSGAGR.[I]	1xTMT6plex [N-Term]; 1xPhospho [S4(100)]	Q6H798 1xPhospho [S22(100)]	2.17232e-05	0	1	1	4	Q6H798	Q6H798 [19-32]	0	1765.81	High	High	High	High	High	High	High	High	High	S4(Phospho): 100	1	1.28398	1.0252	1.08187	0.97917	0.919636	1.32201	1.23321	1.44523	4	4	4	4	4	4	4	4	4	Unique	4.40586	High	0	1.92e-06
FALSE	High	[R].SSSASEDEMLNSNSK.[R]	2xTMT6plex [N-Term; K15]; 1xOxidation [M9(100)]; 2xPhospho [S5(100); S]		4.89475e-05	0	1	2	3	Q655M5	Q655M5 [729-743]	0	2219.92	High	High	High	High	High	High	High	High	High	S2(Phospho): 49.69; S3(Phospho): 49.69; S5(Phospho): 99.99; M9(Oxidation): 100	1	0.876965	0.961305	0.992933	0.896735	0.982183	1.56918	1.30717	1.30047	2	2	2	2	2	2	2	2	2	Unique	3.99393	High	0	4.956e-06
FALSE	High	[R].AAAATSEGSGTVASGETDGSDDR.[G]	1xTMT6plex [N-Term]; 1xPhospho [S20(99.3)]	Q10CW0 1xPhospho [S277(99.3)]	7.95519e-08	0	1	1	2	Q10CW0	Q10CW0 [258-280]	0	2421.03	High	High	High	High	High	High	High	High	High	S20(Phospho): 99.11	1	1.08504	1.07098	1.20598	0.864565	0.881521	1.6724	1.36864	1.77336	2	2	2	2	2	2	2	2	2	Unique	5.04327	High	0	3.405e-09
FALSE	High	[K].GSKPDGSDENIDASNQDNR.[A]	2xTMT6plex [N-Term; K3]; 1xPhospho [S7(100)]	A0A0P0XLI9 1xPhospho [S193(100)]	0.00101563	0	1	1	1	A0A0P0XLI9	A0A0P0XLI9 [187-205]	0	2557.16	High	High	High	High	High	High	High	High	High	S7(Phospho): 100	1	0.89219	0.861169	0.930386	0.839432	0.793564	1.25667	1.11028	1.50917	1	1	1	1	1	1	1	1	1	Unique	3.61319	High	0	0.0001722
FALSE	High	[R].SFASISPPRR.[H]	1xTMT6plex [N-Term]; 1xPhospho [S6(100)]	Q0DI98 1xPhospho [S65(100)]	0.000352396	0	1	1	7	Q0DI98	Q0DI98 [60-69]	1	1426.74	High	High	High	High	High	High	High	High	High	S6(Phospho): 100	1	0.87595	0.955583	0.989024	1.09478	1.03593	1.05306	1.02191	0.955445	7	7	7	7	7	7	7	7	7	Unique	3.42876	High	0	4.964e-05
FALSE	High	[R].ESSALSDPPSPK.[S]	2xTMT6plex [N-Term; K12]; 3xPhospho [S3(100); S6(100); S10(100)]	Q2R0E9 3xPhospho [S459(100); S463(100); S]	1.23518e-05	0	1	2	16	Q2R0E9	Q2R0E9 [454-465]	0	1912.81	High	High	High	High	High	High	High	High	High	S2(Phospho): 50; S3(Phospho): 50; S6(Phospho): 100; S10(Phospho): 100	1	0.96324	1.08338	1.11216	1.11991	1.16689	1.25477	1.29084	1.31012	16	16	16	16	16	16	16	16	16	Unique	5.14877	High	0	9.963e-07
FALSE	High	[R].ESSALSDPPSPK.[S]	2xTMT6plex [N-Term; K12]; 2xPhospho [S6(100); S10(100)]	Q2R0E9 2xPhospho [S459(100); S463(100)]	1.86411e-05	0	1	2	17	Q2R0E9	Q2R0E9 [454-465]	0	1832.85	High	High	High	High	High	High	High	High	High	S6(Phospho): 100; S10(Phospho): 100	1	0.976435	1.15299	1.07991	1.0234	1.06623	1.29644	1.38592	1.41266	17	17	17	17	17	17	17	17	17	Unique	4.53986	High	0	2.399e-06
FALSE	High	[R].ESSALSDPPSPK.[S]	2xTMT6plex [N-Term; K12]; 1xPhospho [S10(100)]	Q2R0E9 1xPhospho [S463(100)]	0.000208422	0	1	2	1	Q2R0E9	Q2R0E9 [454-465]	0	1752.88	High	High	High	High	High	High	High	High	High	S10(Phospho): 100	1	1.17741	1.08814	1.13073	1.17722	1.05841	1.25288	1.23705	1.25824	1	1	1	1	1	1	1	1	1	Unique	3.60095	High	0	2.688e-05
FALSE	High	[R].RNQSVGSFGESGAESGR.[Q]	1xTMT6plex [N-Term]; 1xPhospho [S4(100)]	Q10N88 1xPhospho [S173(100)]	3.10941e-08	0	1	1	1	Q10N88	Q10N88 [170-186]	1	2033.92	High	High	High	High	High	High	High	High	High	S4(Phospho): 100	1	1.09316	0.722886	0.675312	0.640381	0.623515	0.72919	0.792368	0.89392	1	1	1	1	1	1	1	1	1	Unique	5.41179	High	0	9.307e-10
FALSE	High	[R].FSQGLAQDPTTR.[R]	1xTMT6plex [N-Term]; 1xPhospho [S2(100)]	P0C358 1xPhospho [S9(100)]	0.0018213	0	1	1	3	P0C358	P0C358 [8-19]	0	1629.78	High	High	High	High	High	High	High	High	High	S2(Phospho): 100	1	1.00384	1.04141	1.22357	1.18425	1.15223	1.28981	1.31005	1.26066	3	3	3	3	3	3	3	3	3	Unique	3.04632	High	0	0.0003446
FALSE	High	[R].ALIAEGSCGSPR.[S]	1xTMT6plex [N-Term]; 1xCarbamidomethyl [C8]; 1xPhospho [S10(100)]	Q6YXI1 1xPhospho [S605(100)]	3.43762e-05	0	1	1	3	Q6YXI1	Q6YXI1 [596-607]	0	1526.72	High	High	High	High	High	High	High	High	High	S10(Phospho): 100	1	1.07388	0.941278	1.16689	0.96208	0.970455	1.21879	1.10739	1.13399	3	3	3	3	3	3	3	3	3	Unique	4.24006	High	0	3.296e-06
FALSE	High	[K].EENTESPAETPK.[E]	2xTMT6plex [N-Term; K12]; 1xPhospho [S6(100)]	Q5N8F0 1xPhospho [S1061(100)]	0.00014344	0	1	1	2	Q5N8F0	Q5N8F0 [1056-1067]	0	1869.89	High	High	High	High	High	High	High	High	High	S6(Phospho): 100	1	1.02719	1.02997	0.903022	0.883666	0.865884	1.14871	0.995022	1.19189	2	2	2	2	2	2	2	2	2	Unique	3.637	High	0	1.744e-05
FALSE	High	[R].ASGPATPPDISDK.[M]	2xTMT6plex [N-Term; K13]; 1xPhospho [S2(100)]	Q9FP25 1xPhospho [S46(100)]	9.46075e-05	0	1	1	4	Q9FP25	Q9FP25 [45-57]	0	1793.91	High	High	High	High	High	High	High	High	High	S2(Phospho): 100	1	1.07794	0.914575	1.28026	1.07668	0.987069	1.47164	1.28892	1.49228	4	4	4	4	4	4	4	4	4	Unique	3.56648	High	0	1.071e-05
FALSE	High	[K].GASPPRNDIVNEEVDQR.[Q]	1xTMT6plex [N-Term]; 1xPhospho [S3(100)]	B7FAK7 1xPhospho [S662(100)]	5.61404e-05	0	1	1	3	B7FAK7	B7FAK7 [660-676]	1	2205.05	High	High	High	High	High	High	High	High	High	S3(Phospho): 100	1	0.982525	0.989915	1.06134	0.958058	0.944068	1.09947	0.995022	1.03748	3	3	3	3	3	3	3	3	3	Unique	4.50297	High	0	5.81e-06
FALSE	High	[R].SASPDELER.[H]	1xTMT6plex [N-Term]; 2xPhospho [S1(100); S3(100)]	Q10L03 2xPhospho [S218(100); S220(100)]	0.000825573	0	1	1	8	Q10L03	Q10L03 [218-226]	0	1392.56	High	High	High	High	High	High	High	High	High	S1(Phospho): 100; S3(Phospho): 100	1	1.06576	0.878335	0.937227	0.788161	0.826793	0.982986	0.92491	0.974746	8	8	8	8	8	8	8	8	8	Unique	4.01199	High	0	0.0001353
FALSE	High	[R].AVESESGEETVDEEGGSAGGGSK.[V]	2xTMT6plex [N-Term; K23]; 2xPhospho [S4(100); S6(100)]	A0A0N7KFQ9 2xPhospho [S220(100); S222(100)]	2.46903e-09	0	1	1	5	A0A0N7KFQ9	A0A0N7KFQ9 [217-239]	0	2786.17	High	High	High	High	High	High	High	High	High	S4(Phospho): 100; S6(Phospho): 100	1	1.01095	0.897409	1.10825	1.08473	1.06916	1.70744	1.39937	1.57914	5	5	5	5	5	5	5	5	5	Unique	6.03751	High	0	4.863e-11
FALSE	High	[R].AVESESGEETVDEEGGSAGGGSK.[V]	2xTMT6plex [N-Term; K23]; 1xPhospho [S6(99.4)]	A0A0N7KFQ9 1xPhospho [S222(100)]	4.74056e-11	0	1	1	9	A0A0N7KFQ9	A0A0N7KFQ9 [217-239]	0	2706.2	High	High	High	High	High	High	High	High	High	S6(Phospho): 100	1	1.06677	0.968935	1.14246	1.08975	0.963614	1.71691	1.53095	1.89762	6	6	6	6	6	6	6	6	6	Unique	6.51578	High	0	4.87e-13
FALSE	High	[K].AAAAAAASGSPSVGAAGGNADASPAAPAPR.[S]	1xTMT6plex [N-Term]; 1xPhospho [S23(100)]	Q67WK6 1xPhospho [S143(100)]	4.09785e-09	0	1	1	5	Q67WK6	Q67WK6 [121-150]	0	2771.33	High	High	High	High	High	High	High	High	High	S23(Phospho): 100	1	1.18654	1.00517	1.05255	1.04451	1.00368	1.17523	1.05169	1.35475	4	4	4	4	4	4	4	4	4	Unique	5.7423	High	0	8.782e-11
FALSE	High	[K].AAGSDSDDDEQGTQQKK.[E]	3xTMT6plex [N-Term; K16; K17]; 2xPhospho [S4(100); S6(100)]	Q6K7Q7 2xPhospho [S132(100); S134(100)]	0.000791975	0	1	1	2	Q6K7Q7	Q6K7Q7 [129-145]	1	2627.18	High	High	High	High	High	High	High	High	High	S4(Phospho): 100; S6(Phospho): 100	1	0.94497	1.23882	1.32619	1.27373	1.50895	1.99912	1.46852	1.93984	2	2	2	2	2	2	2	2	2	Unique	2.80824	High	0	0.0001283
FALSE	High	[K].TIAQEVNDDSDDDSGETESR.[T]	1xTMT6plex [N-Term]; 2xPhospho [S10(100); S14(100)]	A0A0N7KQA7 2xPhospho [S137(100); S141(100)]	8.15479e-07	0	1	1	2	A0A0N7KQA7	A0A0N7KQA7 [128-147]	0	2571.98	High	High	High	High	High	High	High	High	High	S10(Phospho): 100; S14(Phospho): 100	1	1.19365	1.1816	1.34574	1.27775	1.16787	1.97071	2.03423	2.05203	2	2	2	2	2	2	2	2	2	Unique	4.00672	High	0	4.21e-08
FALSE	High	[K].TIAQEVNDDSDDDSGETESR.[T]	1xTMT6plex [N-Term]; 1xPhospho [S10(100)]	A0A0N7KQA7 1xPhospho [S137(100)]	1.06123e-09	0	1	1	4	A0A0N7KQA7	A0A0N7KQA7 [128-147]	0	2492.01	High	High	High	High	High	High	High	High	High	S10(Phospho): 100	1	1.09316	0.999452	1.02225	0.873613	0.795519	1.28981	0.995022	1.43558	4	4	4	4	4	4	4	4	4	Unique	5.16221	High	0	1.815e-11
FALSE	High	[R].SSNPFDSDSDDGGR.[E]	1xTMT6plex [N-Term]; 2xPhospho [S7(100); S9(100)]	A0A0P0VIH5 2xPhospho [S22(100); S24(100)]	1.78706e-05	0	1	1	5	A0A0P0VIH5	A0A0P0VIH5 [16-29]	0	1844.66	High	High	High	High	High	High	High	High	High	S7(Phospho): 100; S9(Phospho): 100	1	0.99369	0.929834	0.929409	0.917846	0.908885	1.14398	1.17174	1.2884	5	5	5	5	5	5	5	5	5	Unique	3.88986	High	0	6.507e-06
FALSE	High	[R].SSNPFDSDSDDGGR.[E]	1xTMT6plex [N-Term]; 1xPhospho [S9(100)]	A0A0P0VIH5 1xPhospho [S22(100)]	3.32489e-07	0	1	1	12	A0A0P0VIH5	A0A0P0VIH5 [16-29]	0	1764.69	High	High	High	High	High	High	High	High	High	S9(Phospho): 100	1	1.11549	1.02139	1.02421	0.868586	0.916704	1.35137	1.27835	1.44885	12	12	12	12	12	12	12	12	12	Unique	4.27188	High	0	1.478e-08
FALSE	High	[R].AAEDSTPPPSPPR.[A]	1xTMT6plex [N-Term]; 2xPhospho [S5(99.3); S10(100)]	Q0JEF2 2xPhospho [S55(99.3); S60(100)]	0.000184672	0	1	1	6	Q0JEF2	Q0JEF2 [51-63]	0	1710.73	High	High	High	High	High	High	High	High	High	S5(Phospho): 99.26; S10(Phospho): 100	1	1.22917	0.91076	0.965569	0.851496	0.860998	1.00287	0.887452	1.08573	3	3	3	3	3	3	3	3	3	Unique	3.70693	High	0	2.343e-05
FALSE	High	[K].LPEESDGSESSDDDKRK.[-]	3xTMT6plex [N-Term; K15; K17]; 2xPhospho [S]	Q0DP22 2xPhospho [S1252(97); S1254(97)]	6.50716e-05	0	1	2	4	Q0DP22	Q0DP22 [1245-1261]	2	2741.25	High	High	High	High	High	High	High	High	High	S10(Phospho): 99.99; S11(Phospho): 99.99	1	1.01501	1.00041	0.731995	0.644402	0.66163	0.898703	0.75299	0.751568	3	3	3	3	3	3	3	3	3	Unique	4.11738	High	0	6.905e-06
FALSE	High	[K].VESTACSVSPTADQK.[A]	2xTMT6plex [N-Term; K15]; 1xCarbamidomethyl [C6]; 1xPhospho [S9(100)]	Q40682 1xPhospho [S87(100)]	1.18807e-07	0	1	1	3	Q40682	Q40682 [79-93]	0	2118.02	High	High	High	High	High	High	High	High	High	S9(Phospho): 100	1	1.17741	1.00136	1.26364	1.12796	1.10434	1.55497	1.40417	1.80232	3	3	3	3	3	3	3	3	3	Unique	4.93283	High	0	4.445e-09
FALSE	High	[R].SSSASEDEMLNSNSK.[R]	2xTMT6plex [N-Term; K15]; 3xPhospho [S2(99.1); S3(99.1); S5(100)]	Q655M5 3xPhospho [S730(99.1); S731(99.1); S733(100)]	0.000149612	0	1	2	1	Q655M5	Q655M5 [729-743]	0	2283.89	High	High	High	High	High	High	High	High	High	S2(Phospho): 99.12; S3(Phospho): 99.12; S5(Phospho): 99.99	1	0.9673	1.00422	1.04375	1.136	0.996842	1.34569	1.48485	1.48142	1	1	1	1	1	1	1	1	1	Unique	3.95366	High	0	1.824e-05
FALSE	High	[R].SSSASEDEMLNSNSK.[R]	2xTMT6plex [N-Term; K15]; 2xPhospho [S3(98.4); S5(98.4)]	Q655M5 2xPhospho [S733(99.7); S]	2.42247e-07	0	1	2	5	Q655M5	Q655M5 [729-743]	0	2203.92	High	High	High	High	High	High	High	High	High	S1(Phospho): 99.33; S2(Phospho): 33.56; S3(Phospho): 33.56; S5(Phospho): 33.56	1	1.06779	1.02711	1.07307	1.09679	0.979251	1.17333	1.18807	1.21843	5	5	5	5	5	5	5	5	5	Unique	5.46028	High	0	1.019e-08
FALSE	High	[K].ENDDEDDEGPADSEDASMGEEDDEDSEAK.[D]	2xTMT6plex [N-Term; K29]; 2xPhospho [S13(100); S17(100)]	Q5JKH1 2xPhospho [S266(100); S270(100)]	0.0011495	0	1	2	1	Q5JKH1	Q5JKH1 [254-282]	0	3763.34	High	High	High	High	High	High	High	High	High	S13(Phospho): 99.99; S17(Phospho): 99.99	1	1.11042	1.0519	1.74545	1.2114	1.13562	2.26617	1.28027	1.8554	1	1	1	1	1	1	1	1	1	Unique	2.37661	High	0	0.0002001
FALSE	High	[R].LDGGGGEASTDEEDREVER.[A]	1xTMT6plex [N-Term]; 2xPhospho [S9(100); T10(100)]	Q84JI0 2xPhospho [S65(100); T66(100)]	0.000278275	0	1	1	2	Q84JI0	Q84JI0 [57-75]	1	2409.96	High	High	High	High	High	High	High	High	High	S9(Phospho): 100; T10(Phospho): 100	1	0.85362	1.08528	0.855134	0.879644	0.895203	1.37978	1.17847	1.39456	2	2	2	2	2	2	2	2	2	Unique	3.16948	High	0	3.77e-05
FALSE	High	[K].VSNSSINEESDGPSPK.[L]	2xTMT6plex [N-Term; K16]; 1xPhospho [S4(95.4)]	Q10E10 1xPhospho [S656(100)]	2.53099e-08	0	1	3	4	Q10E10	Q10E10 [643-658]	0	2185.04	High	High	High	High	High	High	High	High	High	S14(Phospho): 100	1	1.24541	1.1015	1.26951	0.93192	1.14246	1.31917	1.21304	1.28961	4	4	4	4	4	4	4	4	4	Unique	4.84255	High	0	7.347e-10
FALSE	High	[R].ASTPSDVATSSTNSQNQETK.[Q]	2xTMT6plex [N-Term; K20]; 2xPhospho [S10(96.5); T19(97.6)]	Q10Q16 2xPhospho [S979(96.5); T988(97.6)]	3.47408e-05	0	1	1	5	Q10Q16	Q10Q16 [970-989]	0	2671.19	High	High	High	High	High	High	High	High	High	S10(Phospho): 96.46; T19(Phospho): 97.61	1	1.10433	1.04809	1.02909	1.05859	0.790633	1.68661	1.39457	2.1401	2	2	2	2	2	2	2	2	2	Unique	3.48043	High	0	3.336e-06
FALSE	High	[K].TTEKEISDDEDEEEKK.[D]	4xTMT6plex [N-Term; K4; K15; K16]; 1xPhospho [S7(100)]	Q07078 1xPhospho [S220(100)]	0.0014044	0	1	4	6	Q07078	Q07078 [214-229]	2	2921.47	High	High	High	High	High	High	High	High	High	S7(Phospho): 100	1	0.93076	1.0376	1.03007	1.00832	1.04375	1.25762	1.28508	1.32821	4	4	4	4	4	4	4	4	4	Unique	2.8284	High	0	0.0002529
FALSE	High	[K].EDAKPAESEAAPPAPSEGGEK.[K]	3xTMT6plex [N-Term; K4; K21]; 1xPhospho [S8(100)]	Q2QM23 1xPhospho [S215(100)]	1.75569e-07	0	1	2	4	Q2QM23	Q2QM23 [208-228]	0	2834.41	High	High	High	High	High	High	High	High	High	S8(Phospho): 100	1	1.082	0.984193	1.16005	1.02944	0.990001	1.38167	1.2505	1.44161	4	4	4	4	4	4	4	4	4	Unique	5.57625	High	0	7.015e-09
FALSE	High	[R].SLSVGGGGGGGK.[N]	2xTMT6plex [N-Term; K12]; 1xPhospho [S3(99.6)]	A0A0P0WTV3 1xPhospho [S228(99.6)]	7.84591e-06	0	1	1	1	A0A0P0WTV3	A0A0P0WTV3 [226-237]	0	1470.77	High	High	High	High	High	High	High	High	High	S3(Phospho): 99.63	1	1.4271	1.02997	0.635243	0.800225	0.689971	0.753812	0.630053	0.671948	1	1	1	1	1	1	1	1	1	Unique	4.33846	High	0	5.888e-07
FALSE	High	[K].GQDELGENHSPSLQK.[S]	2xTMT6plex [N-Term; K15]; 1xPhospho [S10(100)]	Q0J0K9 1xPhospho [S59(100)]	0.000145724	0	1	2	2	Q0J0K9	Q0J0K9 [50-64]	0	2177.06	High	High	High	High	High	High	High	High	High	S10(Phospho): 100	1	1.08606	0.978471	1.11216	0.953032	0.944068	1.02181	1.08626	1.12675	2	2	2	2	2	2	2	2	2	Unique	3.17251	High	0	1.77e-05
FALSE	High	[R].MAGGESSESEDTQGK.[S]	2xTMT6plex [N-Term; K15]; 2xPhospho [S7(99); S9(100)]	Q10BA4 2xPhospho [S290(99.2); T295(100)]	0.000221997	0	1	1	8	Q10BA4	Q10BA4 [284-298]	0	2130.87	High	High	High	High	High	High	High	High	High	S7(Phospho): 99.32; T12(Phospho): 100	1	1.03429	0.902177	1.02909	0.941973	0.908885	1.28034	1.28892	1.35717	6	6	6	6	6	6	6	6	6	Unique	3.2502	High	0	2.89e-05
FALSE	High	[K].NTNTDEYGSTGSYNK.[S]	2xTMT6plex [N-Term; K15]; 2xPhospho [S9(99.5); S12(100)]	A0A0P0WAD7 2xPhospho [S66(99.5); S69(100)]	1.10345e-07	0	1	1	7	A0A0P0WAD7	A0A0P0WAD7 [58-72]	0	2268.95	High	High	High	High	High	High	High	High	High	S9(Phospho): 100; S12(Phospho): 100	1	1.03632	1.06716	1.24312	1.32097	1.12878	1.81445	1.59914	1.76974	7	7	7	7	7	7	7	7	7	Unique	5.32979	High	0	4.087e-09
FALSE	High	[K].NTNTDEYGSTGSYNK.[S]	2xTMT6plex [N-Term; K15]; 1xPhospho [S12(99.6)]	A0A0P0WAD7 1xPhospho [S69(99.5)]	1.30856e-08	0	1	1	10	A0A0P0WAD7	A0A0P0WAD7 [58-72]	0	2188.98	High	High	High	High	High	High	High	High	High	S12(Phospho): 99.62	1	1.02516	1.06239	1.30371	1.23753	1.06818	1.59001	1.63468	1.49228	5	5	5	5	5	5	5	5	5	Unique	5.34391	High	0	3.548e-09
FALSE	High	[R].SGGGGPGGGCFK.[C]	2xTMT6plex [N-Term; K12]; 1xCarbamidomethyl [C10]; 1xPhospho [S1(100)]	Q6YUR8 1xPhospho [S117(100)]	2.51364e-07	0	1	1	2	Q6YUR8	Q6YUR8 [117-128]	0	1575.74	High	High	High	High	High	High	High	High	High	S1(Phospho): 100	1	0.827229	0.78869	0.676289	0.657471	0.699744	0.660059	0.750109	0.855316	2	2	2	2	2	2	2	2	2	Unique	4.72184	High	0	1.066e-08
FALSE	High	[R].SVPTSGAYSNK.[F]	2xTMT6plex [N-Term; K11]; 1xPhospho [S9(100)]	Q5QNI2 1xPhospho [S392(100)]	1.50148e-05	0	1	1	8	Q5QNI2	Q5QNI2 [384-394]	0	1648.83	High	High	High	High	High	High	High	High	High	S9(Phospho): 100	1	1.11854	0.812532	0.675312	0.622286	0.5854	0.643013	0.595477	0.591121	8	8	8	8	8	8	8	8	8	Unique	4.5931	High	0	2.626e-06
FALSE	High	[R].DVSEQFDEFPLAYNKDESDTM.[-]	2xTMT6plex [N-Term; K15]; 1xPhospho [S18(92.6)]	Q7XUF9 1xPhospho [S604(100)]	2.773e-09	0	1	1	1	Q7XUF9	Q7XUF9 [602-622]	1	3018.34	High	High	High	High	High	High	High	High	High	S3(Phospho): 100	1	0.872905	1.05	1.05157	1.02541	0.867839	1.41955	1.22937	1.19913	1	1	1	1	1	1	1	1	1	Unique	6.30078	High	0	5.588e-11
FALSE	High	[K].VDLDRSPTPQDK.[S]	2xTMT6plex [N-Term; K12]; 2xPhospho [S6(100); T8(100)]	Q5JKF2 2xPhospho [S709(100); T711(100)]	0.000104021	0	1	3	27	Q5JKF2	Q5JKF2 [704-715]	1	1988.95	High	High	High	High	High	High	High	High	High	S6(Phospho): 100; T8(Phospho): 100	1	0.998765	0.962259	1.02812	0.940968	0.965569	1.04265	1.09875	1.03627	27	27	27	27	27	27	27	27	27	Unique	4.5773	High	0	1.781e-05
FALSE	High	[R].TLAGCEEECSSGGK.[S]	2xTMT6plex [N-Term; K14]; 2xCarbamidomethyl [C5; C9]; 1xPhospho [S10(99.5)]	Q8LI88 1xPhospho [S397(99.5)]	1.15329e-05	0	1	1	2	Q8LI88	Q8LI88 [388-401]	0	2022.89	High	High	High	High	High	High	High	High	High	S10(Phospho): 99.52	1	1.10737	1.21021	1.0545	0.972133	1.12487	1.09947	1.27259	1.36923	1	1	1	1	1	1	1	1	1	Unique	3.79495	High	0	9.231e-07
FALSE	High	[R].GTPPAAPTP.[-]	1xTMT6plex [N-Term]; 2xPhospho [T2(100); T8(100)]	Q5ZBN0 2xPhospho [T677(100); T683(100)]	0.000350553	0	1	1	12	Q5ZBN0	Q5ZBN0 [676-684]	0	1197.52	High	High	High	High	High	High	High	High	High	T2(Phospho): 100; T8(Phospho): 100	1	1.14087	0.934602	1.04962	0.926894	0.907908	0.986774	0.934514	1.04713	12	12	12	12	12	12	12	12	12	Unique	3.58394	High	0	4.932e-05
FALSE	High	[R].GSSIGGAGEDDSDGEVDGAPR.[L]	1xTMT6plex [N-Term]; 1xPhospho [S12(100)]	Q2QT64 1xPhospho [S68(100)]	4.87512e-12	0	1	1	10	Q2QT64	Q2QT64 [57-77]	0	2256.95	High	High	High	High	High	High	High	High	High	S12(Phospho): 100	1	1.07997	0.931741	1.27049	1.34812	1.10141	1.35516	1.31005	1.35596	10	10	10	10	10	10	10	10	10	Unique	7.02138	High	0	3.431e-14
FALSE	High	[R].ADLDQGESDGEK.[V]	2xTMT6plex [N-Term; K12]; 1xPhospho [S8(100)]	Q2QN51 1xPhospho [S122(100)]	2.32655e-05	0	1	1	10	Q2QN51	Q2QN51 [115-126]	0	1801.83	High	High	High	High	High	High	High	High	High	S8(Phospho): 100	1	1.05459	0.923158	1.033	0.807262	0.829724	1.15913	1.07858	1.20034	10	10	10	10	10	10	10	10	10	Unique	4.28406	High	0	2.086e-06
FALSE	High	[K].AASGMSSDEK.[N]	2xTMT6plex [N-Term; K10]; 2xPhospho [S6(100); S7(100)]	Q7Y1H6 2xPhospho [S231(100); S232(100)]	0.0016369	0	1	1	3	Q7Y1H6	Q7Y1H6 [226-235]	0	1600.67	High	High	High	High	High	High	High	High	High	S6(Phospho): 100; S7(Phospho): 100	1	1.03937	0.941278	0.931363	0.789167	0.825815	1.1364	1.07954	1.29082	3	3	3	3	3	3	3	3	3	Unique	2.84755	High	0	0.0003032
FALSE	High	[K].SKSEVDDDQDGGSDEENEDDEE.[-]	2xTMT6plex [N-Term; K2]; 2xPhospho [S13(100); S]	Q6ESQ0 2xPhospho [S136(100); S]	3.07183e-07	0	1	1	2	Q6ESQ0	Q6ESQ0 [124-145]	1	3061.12	High	High	High	High	High	High	High	High	High	S1(Phospho): 50; S3(Phospho): 50; S13(Phospho): 100	1	0.86783	1.20259	1.22944	1.24658	1.47376	1.55781	1.47428	1.77457	2	2	2	2	2	2	2	2	2	Unique	5.33864	High	0	1.559e-08
FALSE	High	[K].SVTSSISSASGK.[H]	2xTMT6plex [N-Term; K12]; 1xPhospho [S10(100)]	Q6Z653 1xPhospho [S164(100)]	2.19537e-05	0	1	1	2	Q6Z653	Q6Z653 [155-166]	0	1648.86	High	High	High	High	High	High	High	High	High	S10(Phospho): 100	1	0.97948	0.969888	0.963614	0.817315	0.868816	0.969728	0.948921	1.05678	2	2	2	2	2	2	2	2	2	Unique	3.64371	High	0	1.952e-06
FALSE	High	[R].ANNENDDDDAAPGMSASK.[R]	2xTMT6plex [N-Term; K18]; 1xPhospho [S17(100)]	Q5Z7P1 1xPhospho [S33(100)]	1.12286e-08	0	1	1	2	Q5Z7P1	Q5Z7P1 [17-34]	0	2360.01	High	High	High	High	High	High	High	High	High	S17(Phospho): 100	1	1.07083	1.02616	0.905954	0.883666	0.864907	1.2311	1.35615	1.29082	1	1	1	1	1	1	1	1	1	Unique	5.04743	High	0	3.142e-10
FALSE	High	[R].SMSSVASSSDSK.[A]	2xTMT6plex [N-Term; K12]; 1xPhospho [S3(99)]		0.000203013	0	1	2	7	Q5TKG2	Q5TKG2 [1058-1069]	0	1710.8	High	High	High	High	High	High	High	High	High	S3(Phospho): 99.02	1	0.988615	0.972749	1.0115	0.874618	0.809201	0.914802	0.92587	0.820331	3	3	3	3	3	3	3	3	3	Unique	4.07093	High	0	2.72e-05
FALSE	High	[K].SELISSSASPR.[N]	1xTMT6plex [N-Term]; 1xPhospho [S9(99.1)]		0.000207329	0	1	1	2	A0A0P0VPQ7	A0A0P0VPQ7 [43-53]	0	1442.71	High	High	High	High	High	High	High	High	High	S9(Phospho): 99.14	1	1.12463	1.04332	0.974364	0.824352	0.867839	0.912908	0.948921	0.901158	2	2	2	2	2	2	2	2	2	Unique	3.40581	High	0	2.675e-05
FALSE	High	[K].IVSDESAQESSK.[L]	2xTMT6plex [N-Term; K12]; 1xPhospho [S6(100)]	Q0JBZ3 1xPhospho [S294(100)]	0.000453155	0	1	2	1	Q0JBZ3	Q0JBZ3 [289-300]	0	1817.89	High	High	High	High	High	High	High	High	High	S6(Phospho): 100	1	1.0414	0.946046	0.977296	0.883666	0.709517	1.072	1.06898	1.01938	1	1	1	1	1	1	1	1	1	Unique	2.85729	High	0	6.68e-05
FALSE	High	[R].ASFGGDSGDEAASGEPSSSSSSSPSR.[R]	1xTMT6plex [N-Term]; 2xPhospho [S7(100); S]	Q5I396 2xPhospho [S66(100); S]	0.000109072	0	1	1	4	Q5I396	Q5I396 [60-85]	0	2792.08	High	High	High	High	High	High	High	High	High	S7(Phospho): 100; S18(Phospho): 16.59; S19(Phospho): 16.59; S20(Phospho): 16.59; S21(Phospho): 16.59; S22(Phospho): 16.59; S23(Phospho): 16.59	1	0.927715	0.908853	1.08578	0.870597	0.848293	1.47827	1.2092	1.57552	4	4	4	4	4	4	4	4	4	Unique	3.69731	High	0	1.263e-05
FALSE	High	[R].ASFGGDSGDEAASGEPSSSSSSSPSR.[R]	1xTMT6plex [N-Term]; 1xPhospho [S7(100)]	Q5I396 1xPhospho [S66(100)]	6.28059e-12	0	1	1	3	Q5I396	Q5I396 [60-85]	0	2712.11	High	High	High	High	High	High	High	High	High	S7(Phospho): 100	1	1.14899	0.981332	1.06428	0.907793	0.862953	1.39777	1.23705	1.65755	3	3	3	3	3	3	3	3	3	Unique	7.75773	High	0	4.605e-14
FALSE	High	[K].ELDSPRPENEVGK.[L]	2xTMT6plex [N-Term; K13]; 1xPhospho [S4(100)]	Q5JJM4 1xPhospho [S307(100)]	0.000114369	0	1	1	3	Q5JJM4	Q5JJM4 [304-316]	0	2008.02	High	High	High	High	High	High	High	High	High	S4(Phospho): 100	1	0.98354	0.830652	0.892271	0.795199	0.754473	0.902491	0.830786	0.959064	3	3	3	3	3	3	3	3	3	Unique	4.02963	High	0	1.337e-05
FALSE	High	[R].SYDEEEGDDIDHK.[C]	2xTMT6plex [N-Term; K13]; 1xPhospho [S1(100)]	Q7XB62 1xPhospho [S260(100)]	1.89726e-06	0	1	1	5	Q7XB62	Q7XB62 [260-272]	0	2089.9	High	High	High	High	High	High	High	High	High	S1(Phospho): 100	1	1.11549	0.959398	1.12975	0.810278	0.927454	1.14398	1.05553	1.18707	3	3	3	3	3	3	3	3	3	Unique	4.77308	High	0	1.123e-07
FALSE	High	[K].TTEKEISDDEDEEEK.[K]	3xTMT6plex [N-Term; K4; K15]; 1xPhospho [S7(100)]	Q07078 1xPhospho [S220(100)]	9.35414e-07	0	1	4	6	Q07078	Q07078 [214-228]	1	2564.21	High	High	High	High	High	High	High	High	High	S7(Phospho): 100	1	0.90031	0.933649	0.882498	0.935942	0.973387	1.15534	1.17367	1.28961	6	6	6	6	6	6	6	6	6	Unique	4.66123	High	0	4.94e-08
FALSE	High	[K].TFQGPPHGIQVER.[D]	1xTMT6plex [N-Term]; 1xPhospho [T1(100)]	P0C512 1xPhospho [T147(100)]	2.22272e-06	0	1	3	2	P0C512	P0C512 [147-159]	0	1774.88	High	High	High	High	High	High	High	High	High	T1(Phospho): 100	1	0.99369	0.908853	1.02812	0.963085	1.00662	0.932795	0.98926	1.09659	2	2	2	2	2	2	2	2	2	Unique	4.1184	High	0	1.355e-07
FALSE	High	[K].RGGNVSDDSEDEKPLAAR.[F]	2xTMT6plex [N-Term; K13]; 2xPhospho [S6(100); S9(100)]	Q84ZL5 2xPhospho [S211(100); S214(100)]	0.00102618	0	1	1	1	Q84ZL5	Q84ZL5 [206-223]	1	2534.17	High	High	High	High	High	High	High	High	High	S6(Phospho): 100; S9(Phospho): 100	1	0.796779	0.696183	0.704631	0.738901	0.762291	0.923325	0.98926	1.13037	1	1	1	1	1	1	1	1	1	Unique	3.29231	High	0	0.0001744
FALSE	High	[R].GLAASQEDLDR.[A]	1xTMT6plex [N-Term]; 1xPhospho [S5(100)]	Q2R1S1 1xPhospho [S89(100)]	0.00046517	0	1	1	3	Q2R1S1	Q2R1S1 [85-95]	0	1483.7	High	High	High	High	High	High	High	High	High	S5(Phospho): 100	1	1.4474	0.920297	1.11216	0.947	0.891294	1.36747	1.17174	1.48625	3	3	3	3	3	3	3	3	3	Unique	3.38893	High	0	6.908e-05
FALSE	High	[K].SAGADNDAGGDIAEK.[S]	2xTMT6plex [N-Term; K15]; 1xPhospho [S1(100)]	Q2R176 1xPhospho [S190(100)]	1.10699e-09	0	1	1	6	Q2R176	Q2R176 [190-204]	0	1928.9	High	High	High	High	High	High	High	High	High	S1(Phospho): 100	1	1.07794	1.2331	1.02714	0.786151	0.713426	0.948894	1.02384	1.14364	6	6	6	6	6	6	6	6	6	Unique	5.71503	High	0	1.908e-11
FALSE	High	[R].SPTNDDIDSKSDGSDSVANR.[S]	2xTMT6plex [N-Term; K10]; 2xPhospho [S9(100); S11(98.4)]	Q0DVY2 2xPhospho [S172(100); S174(98.4)]	3.90949e-06	0	1	1	4	Q0DVY2	Q0DVY2 [164-183]	1	2698.16	High	High	High	High	High	High	High	High	High	S11(Phospho): 98.85; S14(Phospho): 98.85	1	1.32154	1.23787	1.0848	0.754986	0.731995	0.903438	0.744346	0.962683	4	4	4	4	4	4	4	4	4	Unique	4.16834	High	0	2.617e-07
FALSE	High	[R].LDSSSAEDAQGSGK.[S]	2xTMT6plex [N-Term; K14]; 1xPhospho [S12(98.7)]	Q6YZW8 1xPhospho [S192(98.7)]	1.48572e-05	0	1	2	1	Q6YZW8	Q6YZW8 [181-194]	0	1889.89	High	High	High	High	High	High	High	High	High	S12(Phospho): 98.72	1	1.04749	0.866891	0.860998	0.765039	0.807247	1.0095	0.949881	0.998874	1	1	1	1	1	1	1	1	1	Unique	3.82222	High	0	1.233e-06
FALSE	High	[R].EIHLNAPSPDR.[A]	1xTMT6plex [N-Term]; 1xPhospho [S8(100)]	A0A0P0YBA4 1xPhospho [S90(100)]	0.000508433	0	1	1	3	A0A0P0YBA4	A0A0P0YBA4 [83-93]	0	1557.76	High	High	High	High	High	High	High	High	High	S8(Phospho): 100	1	1.07591	0.934602	0.970455	0.936947	0.956773	1.4063	1.26971	1.45368	3	3	3	3	3	3	3	3	3	Unique	3.54078	High	0	7.657e-05
FALSE	High	[K].SSGNLADSPNSGNEVNK.[S]	2xTMT6plex [N-Term; K17]; 1xPhospho [S8(100)]	Q0D412 1xPhospho [S373(100)]	0.000383229	0	1	1	1	Q0D412	Q0D412 [366-382]	0	2228.06	High	High	High	High	High	High	High	High	High	S8(Phospho): 99.99	1	1.33067	1.17874	1.71809	1.17018	1.42881	1.76615	1.52519	1.52847	1	1	1	1	1	1	1	1	1	Unique	2.94007	High	0	5.472e-05
FALSE	High	[R].YPAYPANASSSQNTR.[Y]	1xTMT6plex [N-Term]; 1xPhospho [S11(99.6)]	Q69V56 1xPhospho [S39(100)]	0.000175206	0	1	2	8	Q69V56	Q69V56 [29-43]	0	1935.88	High	High	High	High	High	High	High	High	High	S11(Phospho): 99.45	1	1.15406	0.962259	1.09848	1.0978	0.996842	1.20174	1.25338	1.23412	4	4	4	4	4	4	4	4	4	Unique	3.16758	High	0	6.989e-05
FALSE	High	[K].EISDDEDEEEK.[K]	2xTMT6plex [N-Term; K11]; 1xPhospho [S3(100)]	Q07078 1xPhospho [S220(100)]	5.45141e-06	0	1	4	7	Q07078	Q07078 [218-228]	0	1875.81	High	High	High	High	High	High	High	High	High	S3(Phospho): 100	1	0.96933	0.736238	0.784769	0.485564	0.647947	0.853247	0.940277	1.02662	7	7	7	7	7	7	7	7	7	Unique	4.39295	High	0	1.46e-06
FALSE	High	[R].RKEEGEEDGFSSDGGDTTDAESSDER.[A]	2xTMT6plex [N-Term; K2]; 3xPhospho [S11(98.9); S22(98.5); S/T]	Q2QPW9 3xPhospho [S21(98.9); S32(98.5); S/T]	7.24881e-06	0	1	1	5	Q2QPW9	Q2QPW9 [11-36]	2	3503.35	High	High	High	High	High	High	High	High	High	S11(Phospho): 97.63; T17(Phospho): 97.69; S22(Phospho): 95.43	1	0.835349	0.938417	0.938204	0.793188	0.674334	1.1364	0.918187	1.02662	4	4	4	4	4	4	4	4	4	Unique	4.52544	High	0	5.35e-07
FALSE	High	[K].TLSGSGSSEGHLR.[V]	1xTMT6plex [N-Term]; 3xPhospho [S3(100); S7(100); S8(100)]	Q84R70 3xPhospho [S656(100); S658(99.4); S/T]	0.000989717	0	1	1	8	Q84R70	Q84R70 [654-666]	0	1756.69	High	High	High	High	High	High	High	High	High	S3(Phospho): 99.98; S7(Phospho): 100; S8(Phospho): 100	1	1.13478	1.02902	1.02323	0.947	0.867839	1.358	1.117	1.33304	8	8	8	8	8	8	8	8	8	Unique	3.08241	High	0	0.0002565
FALSE	High	[K].TLSGSGSSEGHLR.[V]	1xTMT6plex [N-Term]; 2xPhospho [S3(99.3); S8(99.3)]	Q84R70 2xPhospho [S656(99.3); S661(99.3)]	0.000195674	0	1	1	2	Q84R70	Q84R70 [654-666]	0	1676.72	High	High	High	High	High	High	High	High	High	S3(Phospho): 99.31; S8(Phospho): 99.31	1	1.00283	0.944139	0.845361	0.923878	0.960682	1.13166	1.02576	0.988017	1	1	1	1	1	1	1	1	1	Unique	3.50205	High	0	2.504e-05
FALSE	High	[R].YSTPPQSTSNGPQSGEASTSNQSPK.[G]	2xTMT6plex [N-Term; K25]; 1xPhospho [S23(100)]	Q5Z880 1xPhospho [S425(100)]	0.00155555	0	1	1	1	Q5Z880	Q5Z880 [403-427]	0	3075.43	High	High	High	High	High	High	High	High	High	S23(Phospho): 99.98	1	0.88001	0.860216	0.999774	1.00129	1.11509	1.36841	1.20824	1.43679	1	1	1	1	1	1	1	1	1	Unique	3.63311	High	0	0.0002862
FALSE	High	[R].SSAAAASAEEATGSDGLR.[E]	1xTMT6plex [N-Term]; 1xPhospho [S14(100)]	Q8S0V9 1xPhospho [S89(100)]	2.13428e-07	0	1	1	2	Q8S0V9	Q8S0V9 [76-93]	0	1959.89	High	High	High	High	High	High	High	High	High	S14(Phospho): 100	1	1.11346	1.02902	1.07209	1.02441	0.904976	1.17807	1.06898	1.33063	2	2	2	2	2	2	2	2	2	Unique	4.95269	High	0	8.795e-09
FALSE	High	[R].DSDSDDESKPSSASAAAAAAQTGR.[E]	2xTMT6plex [N-Term; K9]; 1xPhospho [S4(100)]	Q6ERT7 1xPhospho [S53(100)]	0.000446095	0	1	1	2	Q6ERT7	Q6ERT7 [50-73]	0	2833.29	High	High	High	High	High	High	High	High	High	S4(Phospho): 99.99	1	1.01399	1.07956	0.876635	0.693662	0.686062	1.00761	0.845193	0.869792	2	2	2	2	2	2	2	2	2	Unique	3.45535	High	0	6.539e-05
FALSE	High	[R].NETASDVDEAGQSTSSNIR.[K]	1xTMT6plex [N-Term]; 1xPhospho [S5(99.6)]	A0A0P0VV16 1xPhospho [S377(99.6)]	1.0374e-08	0	1	1	4	A0A0P0VV16	A0A0P0VV16 [373-391]	0	2290	High	High	High	High	High	High	High	High	High	S5(Phospho): 99.55	1	0.96324	1.04332	0.992933	1.06864	0.960682	1.32769	1.18519	1.48625	3	3	3	3	3	3	3	3	3	Unique	5.19826	High	0	2.598e-10
FALSE	High	[R].TTATTTAPLSRSPSPTAASR.[T]	1xTMT6plex [N-Term]; 3xPhospho [S14(97.9); T/S]		0.000217377	0	1	1	5	Q53KV7	Q53KV7 [144-163]	1	2443.09	High	High	High	High	High	High	High	High	High	S10(Phospho): 50.01; S12(Phospho): 50.01; S14(Phospho): 99.14; T16(Phospho): 99.14	1	0.982525	0.986101	1.18644	1.10584	1.09848	1.46596	1.29372	1.51399	5	5	5	5	5	5	5	5	5	Unique	3.56282	High	0	2.987e-05
FALSE	High	[R].QPTGESSDEEDDDAEK.[R]	2xTMT6plex [N-Term; K16]; 2xPhospho [S6(100); S7(100)]	Q6EUQ4 2xPhospho [S94(100); S95(100)]	2.87865e-06	0	1	1	6	Q6EUQ4	Q6EUQ4 [89-104]	0	2369.93	High	High	High	High	High	High	High	High	High	S6(Phospho): 100; S7(Phospho): 100	1	1.05662	1.10531	1.21087	1.04049	1.05841	1.62126	1.58185	1.70822	6	6	6	6	6	6	6	6	6	Unique	4.46058	High	0	1.821e-07
FALSE	High	[R].TGSPPPSPAPVAK.[D]	2xTMT6plex [N-Term; K13]; 2xPhospho [S7(100); T/S]	A0A0N7KNC0 2xPhospho [S166(100); T/S]	7.32572e-06	0	1	1	4	A0A0N7KNC0	A0A0N7KNC0 [160-172]	0	1823.91	High	High	High	High	High	High	High	High	High	T1(Phospho): 50; S3(Phospho): 50; S7(Phospho): 100	1	0.919595	0.932695	0.903999	1.11489	1.13953	0.782222	0.975813	0.919254	2	2	2	2	2	2	2	2	2	Unique	4.70426	High	0	5.424e-07
FALSE	High	[R].TGSPPPSPAPVAK.[D]	2xTMT6plex [N-Term; K13]; 1xPhospho [T1(99.6)]	A0A0N7KNC0 1xPhospho [T160(99.6)]	1.29749e-06	0	1	1	18	A0A0N7KNC0	A0A0N7KNC0 [160-172]	0	1743.94	High	High	High	High	High	High	High	High	High	T1(Phospho): 99.59	1	0.813019	0.82493	0.724176	0.796204	0.820929	0.724455	0.857678	0.832395	9	9	9	9	9	9	9	9	9	Unique	4.54191	High	0	7.202e-08
FALSE	High	[K].DSSPTAMEEDCSNSNSDK.[V]	2xTMT6plex [N-Term; K18]; 1xCarbamidomethyl [C11]; 1xPhospho [S3(99)]	Q0DT06 1xPhospho [S67(99)]	0.000395469	0	1	1	2	Q0DT06	Q0DT06 [65-82]	0	2512.03	High	High	High	High	High	High	High	High	High	S3(Phospho): 98.96	1	1.11955	1.18447	1.22944	1.01737	1.03887	1.63831	1.79892	1.92416	1	1	1	1	1	1	1	1	1	Unique	2.79652	High	0	5.7e-05
FALSE	High	[K].EIADKDSEEAQDEDK.[H]	3xTMT6plex [N-Term; K5; K15]; 1xPhospho [S7(100)]	A0A0P0XT31 1xPhospho [S196(100)]	0.000653253	0	1	1	2	A0A0P0XT31	A0A0P0XT31 [190-204]	1	2489.19	High	High	High	High	High	High	High	High	High	S7(Phospho): 100	1	0.919595	0.91076	0.950909	0.786151	0.810179	0.974463	1.06706	1.1545	2	2	2	2	2	2	2	2	2	Unique	3.15963	High	0	0.0003039
FALSE	High	[R].NQSVGSFGESGAESGR.[Q]	1xTMT6plex [N-Term]; 1xPhospho [S3(100)]	Q10N88 1xPhospho [S173(100)]	5.705e-08	0	1	1	7	Q10N88	Q10N88 [171-186]	0	1877.82	High	High	High	High	High	High	High	High	High	S3(Phospho): 100	1	1.05967	0.868799	0.831679	0.695673	0.70854	0.953629	0.955644	1.06884	7	7	7	7	7	7	7	7	7	Unique	5.20499	High	0	3.373e-09
FALSE	High	[K].RPGYNASDSDSDEMNDDEKQ.[-]	2xTMT6plex [N-Term; K19]; 2xPhospho [S7(100); S9(98.1)]	Q5W6N1 2xPhospho [S92(99.1); S94(100)]	2.8635e-06	0	1	1	8	Q5W6N1	Q5W6N1 [84-103]	1	2891.15	High	High	High	High	High	High	High	High	High	S7(Phospho): 100; S11(Phospho): 100	1	1.15508	0.914575	1.21967	0.804246	0.951886	1.58054	1.28892	1.50555	6	6	6	6	6	6	6	6	6	Unique	3.84477	High	0	4.637e-07
FALSE	High	[R].NVNASPASPPAATSDVTR.[D]	1xTMT6plex [N-Term]; 1xPhospho [S8(100)]	Q0D5J1 1xPhospho [S357(100)]	7.59833e-09	0	1	1	6	Q0D5J1	Q0D5J1 [350-367]	0	2064	High	High	High	High	High	High	High	High	High	S8(Phospho): 100	1	1.13884	1.03855	1.13269	1.14706	1.1366	1.28887	1.20632	1.45247	6	6	6	6	6	6	6	6	6	Unique	5.35107	High	0	1.805e-10
FALSE	High	[K].EGESSDEEETPAK.[V]	2xTMT6plex [N-Term; K13]; 2xPhospho [S4(100); S5(100)]	B7EPQ1 2xPhospho [S223(100); S224(100)]	2.05355e-06	0	1	2	1	B7EPQ1	B7EPQ1 [220-232]	0	2025.83	High	High	High	High	High	High	High	High	High	S4(Phospho): 100; S5(Phospho): 100	1	0.95106	0.616075	0.568786	0.625301	0.664561	0.62502	0.783724	0.817918	1	1	1	1	1	1	1	1	1	Unique	5.07748	High	0	1.228e-07
FALSE	High	[K].AAAEEAPTSAAGDEVVK.[E]	2xTMT6plex [N-Term; K17]; 1xPhospho [S9(100)]	Q0IZR7 1xPhospho [S429(100)]	2.51364e-07	0	1	1	3	Q0IZR7	Q0IZR7 [421-437]	0	2154.07	High	High	High	High	High	High	High	High	High	S9(Phospho): 100	1	0.94903	1.04141	1.11314	1.22245	1.11803	1.24341	1.16598	1.2305	3	3	3	3	3	3	3	3	3	Unique	4.20063	High	0	3.406e-08
FALSE	High	[RK].ASAEVLGK.[G]	2xTMT6plex [N-Term; K8]; 1xPhospho [S2(100)]	Q8H811 1xPhospho [S386(100)]; Q5ZBN0 1xPhospho [S380(100)]; Q0JPG8 1xPhospho [S192(100)]; A0A0N7KDZ0 1xPhospho [S67(100)]	0.000282693	0	4	11	11	Q8H811; Q5ZBN0; Q0JPG8; A0A0N7KDZ0	Q8H811 [385-392]; Q5ZBN0 [379-386]; Q0JPG8 [191-198]; A0A0N7KDZ0 [66-73]	0	1312.73	High	High	High	High	High	High	High	High	High	S2(Phospho): 100	1	1.16929	0.982286	0.906931	0.689641	0.742745	0.659112	0.650222	0.67798	11	11	11	11	11	11	11	11	11	Not Unique	3.64794	High	0	3.848e-05
FALSE	High	[R].AMNKPAEYDSDDEIIATSR.[S]	2xTMT6plex [N-Term; K4]; 1xPhospho [S10(100)]	Q6YS19 1xPhospho [S199(100)]	1.54362e-09	0	1	1	4	Q6YS19	Q6YS19 [190-208]	0	2664.26	High	High	High	High	High	High	High	High	High	S10(Phospho): 100	1	1.21496	1.17207	1.55488	1.28378	1.36235	1.29928	1.37632	1.33786	4	4	4	4	4	4	4	4	4	Unique	5.64952	High	0	2.816e-11
FALSE	High	[R].SSSTPNIPMPDPK.[A]	2xTMT6plex [N-Term; K13]; 1xPhospho [S3(98.8)]		5.02553e-05	0	1	1	32	A0A0P0V2Y7	A0A0P0V2Y7 [113-125]	0	1908.95	High	High	High	High	High	High	High	High	High	S3(Phospho): 98.83	1	1.19162	1.00708	1.06428	0.894724	1.01346	1.02371	1.00175	1.0411	7	7	7	7	7	7	7	7	7	Unique	4.00866	High	0	5.135e-06
FALSE	High	[K].VSQPAEEDEMDFDSEEVEDEEEEEK.[I]	2xTMT6plex [N-Term; K25]; 1xPhospho [S14(100)]	Q0DFD6 1xPhospho [S106(100)]	1.76049e-12	0	1	1	5	Q0DFD6	Q0DFD6 [93-117]	0	3511.44	High	High	High	High	High	High	High	High	High	S14(Phospho): 100	1	1.21395	1.11199	1.02518	1.01436	0.973387	0.938477	0.965248	0.954238	5	5	5	5	5	5	5	5	5	Unique	6.4332	High	0	1.045e-14
FALSE	High	[K].VSQPAEEDEMDFDSEEVEDEEEEEK.[I]	2xTMT6plex [N-Term; K25]; 1xOxidation [M10(100)]; 1xPhospho [S14(100)]	Q0DFD6 1xPhospho [S106(100)]	1.10293e-10	0	1	1	2	Q0DFD6	Q0DFD6 [93-117]	0	3527.43	High	High	High	High	High	High	High	High	High	M10(Oxidation): 100; S14(Phospho): 100	1	1.16827	1.04714	1.0545	1.0988	1.01443	1.1686	1.12564	1.25462	2	2	2	2	2	2	2	2	2	Unique	6.34373	High	0	1.302e-12
FALSE	High	[K].ALLLQEQPTSPSDGSSR.[C]	1xTMT6plex [N-Term]; 1xPhospho [S10(100)]	Q0J0G6 1xPhospho [S702(99.2)]	1.16752e-06	0	1	1	3	Q0J0G6	Q0J0G6 [693-709]	0	2095.03	High	High	High	High	High	High	High	High	High	S10(Phospho): 99.99	1	0.919595	0.941278	1.00662	0.818321	0.807247	1.08337	1.04401	1.08211	3	3	3	3	3	3	3	3	3	Unique	4.11576	High	0	6.371e-08
FALSE	High	[K].ALVEKDSDGEDSVAPVVTK.[L]	3xTMT6plex [N-Term; K5; K19]; 1xPhospho [S7(100)]	Q6K272 1xPhospho [S722(100)]	7.37329e-10	0	1	1	9	Q6K272	Q6K272 [716-734]	1	2726.45	High	High	High	High	High	High	High	High	High	S7(Phospho): 100	1	1.03531	0.986101	1.07307	1.06462	0.990001	1.20648	1.16502	1.20154	9	9	9	9	9	9	9	9	9	Unique	6.12627	High	0	1.19e-11
FALSE	High	[R].IEEVDPTYDSDASEDGADDGDDLSVR.[Q]	1xTMT6plex [N-Term]; 2xPhospho [S24(100); S/T/Y]	Q2QXA8 2xPhospho [S148(100); S/T/Y]	0.000111984	0	1	1	2	Q2QXA8	Q2QXA8 [125-150]	0	3174.24	High	High	High	High	High	High	High	High	High	S10(Phospho): 49.46; S13(Phospho): 49.46; S24(Phospho): 100	1	1.26267	1.01376	0.861975	1.03044	0.93625	1.28508	1.40033	1.64187	1	1	1	1	1	1	1	1	1	Unique	3.51385	High	0	1.303e-05
FALSE	High	[R].IEEVDPTYDSDASEDGADDGDDLSVR.[Q]	1xTMT6plex [N-Term]; 1xPhospho [S10(100)]	Q2QXA8 1xPhospho [S134(100)]	5.25145e-09	0	1	1	5	Q2QXA8	Q2QXA8 [125-150]	0	3094.27	High	High	High	High	High	High	High	High	High	S13(Phospho): 100	1	1.09215	0.944139	1.02714	1.03848	0.927454	1.32959	1.17174	1.34872	2	2	2	2	2	2	2	2	2	Unique	4.73858	High	0	1.172e-10
FALSE	High	[R].QFLIGMSPAR.[E]	1xTMT6plex [N-Term]; 1xPhospho [S7(100)]	Q6Z9X3 1xPhospho [S539(100)]	0.000759719	0	1	1	3	Q6Z9X3	Q6Z9X3 [533-542]	0	1428.73	High	High	High	High	High	High	High	High	High	S7(Phospho): 100	1	1.12361	0.859262	0.999774	0.854512	0.882498	0.79548	0.834628	0.93373	3	3	3	3	3	3	3	3	3	Unique	2.88998	High	0	0.0001224
FALSE	High	[R].NADVDDFDSVSQ.[-]	1xTMT6plex [N-Term]; 1xPhospho [S11(100)]		3.24382e-05	0	1	1	5	Q0J1Z3	Q0J1Z3 [637-648]	0	1620.66	High	High	High	High	High	High	High	High	High	S11(Phospho): 100	1	0.723699	0.859262	0.909863	0.883666	0.876635	0.953629	0.949881	1.20275	5	5	5	5	5	5	5	5	5	Unique	3.24538	High	0	5.562e-05
FALSE	High	[R].GSFVDDQPVTGLDK.[A]	2xTMT6plex [N-Term; K14]; 1xPhospho [T10(100)]	Q943K1 1xPhospho [T165(100)]	5.57688e-07	0	1	1	10	Q943K1	Q943K1 [156-169]	0	2016.01	High	High	High	High	High	High	High	High	High	T10(Phospho): 100	1	0.974405	1.05572	1.64186	1.77437	1.65652	1.5152	1.60395	1.52968	10	10	10	10	10	10	10	10	10	Unique	4.97556	High	0	2.694e-08
FALSE	High	[K].LTYYTPEYETK.[D]	2xTMT6plex [N-Term; K11]; 1xPhospho [T10(100)]	P0C512 1xPhospho [T31(100)]	0.000759719	0	1	4	1	P0C512	P0C512 [22-32]	0	1945.96	High	High	High	High	High	High	High	High	High	T10(Phospho): 100	1	1.2109	1.02234	1.25778	1.33103	1.36431	1.30686	1.42626	1.42472	1	1	1	1	1	1	1	1	1	Unique	3.68876	High	0	0.0001225
FALSE	High	[R].QGSGIIGTFGQSEELR.[S]	1xTMT6plex [N-Term]; 1xPhospho [S3(100)]	Q6AVJ1 1xPhospho [S350(100)]	1.07299e-06	0	1	1	3	Q6AVJ1	Q6AVJ1 [348-363]	0	1987.97	High	High	High	High	High	High	High	High	High	S3(Phospho): 100	1	0.925685	0.905992	0.92159	0.74996	0.884453	1.07106	0.996943	1.12796	3	3	3	3	3	3	3	3	3	Unique	4.25883	High	0	5.78e-08
FALSE	High	[K].GLYQFSNK.[Y]	2xTMT6plex [N-Term; K8]; 1xPhospho [S6(100)]	Q8H4P7 1xPhospho [S79(100)]	0.0016369	0	1	1	23	Q8H4P7	Q8H4P7 [74-81]	0	1494.78	High	High	High	High	High	High	High	High	High	S6(Phospho): 100	1	0.852605	0.332833	0.647947	0.509691	0.447602	0.172354	0.27949	0.135113	22	22	22	22	22	22	22	22	22	Unique	3.4	High	0.001151	0.01171
FALSE	High	[R].LPEGSSEPLLPTK.[R]	2xTMT6plex [N-Term; K13]; 1xPhospho [S5(99.6)]	Q9FNZ8 1xPhospho [S13(99.6)]	0.000597821	0	1	1	6	Q9FNZ8	Q9FNZ8 [9-21]	0	1906.03	High	High	High	High	High	High	High	High	High	S5(Phospho): 99.6	1	0.937865	1.14918	0.971432	0.821337	1.00075	1.19796	1.23994	1.36561	3	3	3	3	3	3	3	3	3	Unique	3.67613	High	0	9.218e-05
FALSE	High	[R].VQGASPGTNEIPAVSTQNMPTER.[S]	1xTMT6plex [N-Term]; 1xPhospho [S5(100)]	Q0JRB9 1xPhospho [S758(100)]	5.27079e-08	0	1	1	6	Q0JRB9	Q0JRB9 [754-776]	0	2693.28	High	High	High	High	High	High	High	High	High	S5(Phospho): 100	1	0.948015	0.914575	0.959705	1.02139	1.00857	1.38641	1.2044	1.44402	6	6	6	6	6	6	6	6	6	Unique	5.45464	High	0	1.725e-09
FALSE	High	[K].LPMFGCTDATQVLK.[E]	2xTMT6plex [N-Term; K14]; 1xCarbamidomethyl [C6]; 1xPhospho [T10(100)]	P18566 1xPhospho [T127(100)]	4.49867e-05	0	1	4	1	P18566	P18566 [118-131]	0	2119.07	High	High	High	High	High	High	High	High	High	T10(Phospho): 100	1	1.14797	1.40858	1.35258	1.43658	1.27146	1.4688	1.31197	1.27513	1	1	1	1	1	1	1	1	1	Unique	3.67623	High	0	4.506e-06
FALSE	High	[K].QELLEPSSDDSELEQQQER.[L]	1xTMT6plex [N-Term]; 2xPhospho [S11(100); S]	Q69MP1 2xPhospho [S50(100); S]	4.49867e-05	0	1	2	1	Q69MP1	Q69MP1 [40-58]	0	2649.12	High	High	High	High	High	High	High	High	High	S7(Phospho): 50; S8(Phospho): 50; S11(Phospho): 100	1	1.00993	0.992776	0.964591	0.923878	0.850248	1.37789	1.28027	1.44282	1	1	1	1	1	1	1	1	1	Unique	3.58046	High	0	4.509e-06
FALSE	High	[R].LQSPGAQQTYGTSQQVDASAGNQGMLSPYR.[S]	1xTMT6plex [N-Term]; 1xOxidation [M25(100)]; 1xPhospho [S3(100)]	Q5JLB5 1xPhospho [S285(100)]	3.29557e-05	0	1	3	3	Q5JLB5	Q5JLB5 [283-312]	0	3465.59	High	High	High	High	High	High	High	High	High	S3(Phospho): 100; M25(Oxidation): 100	1	0.847529	0.924112	0.80236	1.06864	0.86393	1.37789	1.02095	1.36682	3	3	3	3	3	3	3	3	3	Unique	4.22585	High	0	3.14e-06
FALSE	High	[R].LQSPGAQQTYGTSQQVDASAGNQGMLSPYR.[S]	1xTMT6plex [N-Term]; 1xPhospho [S3(100)]	Q5JLB5 1xPhospho [S285(100)]	7.46347e-11	0	1	3	5	Q5JLB5	Q5JLB5 [283-312]	0	3449.6	High	High	High	High	High	High	High	High	High	S3(Phospho): 100	1	1.1906	1.08719	1.25289	1.19129	1.07893	1.59664	1.39553	1.76854	4	4	4	4	4	4	4	4	4	Unique	7.30325	High	0	8.252e-13
FALSE	High	[R].EISGQADSASTAAPWDETSR.[D]	1xTMT6plex [N-Term]; 1xPhospho [S3(100)]	Q10NP2 1xPhospho [S231(100)]	1.72811e-07	0	1	1	5	Q10NP2	Q10NP2 [229-248]	0	2388.06	High	High	High	High	High	High	High	High	High	S3(Phospho): 100	1	0.95106	0.889779	0.994888	0.971127	1.05646	1.32012	1.09299	1.40059	3	3	3	3	3	3	3	3	3	Unique	4.99502	High	0	6.891e-09
FALSE	High	[K].GPSDGDVEMAEAETAK.[E]	2xTMT6plex [N-Term; K16]; 1xPhospho [S3(100)]	Q10H93 1xPhospho [S66(100)]	1.57728e-06	0	1	2	3	Q10H93	Q10H93 [64-79]	0	2144.98	High	High	High	High	High	High	High	High	High	S3(Phospho): 100	1	1.1226	0.924112	1.10923	1.00732	0.858066	1.25193	1.39745	1.44402	3	3	3	3	3	3	3	3	3	Unique	4.19707	High	0	9.059e-08
FALSE	High	[R].VSSQFLPPEGSR.[K]	1xTMT6plex [N-Term]; 1xPhospho [S3(100)]	Q6K3D4 1xPhospho [S87(100)]	0.00141885	0	1	1	6	Q6K3D4	Q6K3D4 [85-96]	0	1612.79	High	High	High	High	High	High	High	High	High	S3(Phospho): 100	1	0.992675	1.01376	1.10825	1.06161	1.08773	1.07958	1.12564	1.16053	5	5	5	5	5	5	5	5	5	Unique	3.28897	High	0	0.0002554
FALSE	High	[K].LPMFGCTDATQVLK.[E]	2xTMT6plex [N-Term; K14]; 1xCarbamidomethyl [C6]; 1xOxidation [M3(100)]; 1xPhospho [T7(99.1)]	P18566 1xPhospho [T124(99.1)]	0.00177566	0	1	4	1	P18566	P18566 [118-131]	0	2135.07	High	High	High	High	High	High	High	High	High	M3(Oxidation): 100; T7(Phospho): 99.12	1	1.11346	1.2455	1.34574	1.49288	1.31251	1.55876	1.38688	1.50796	1	1	1	1	1	1	1	1	1	Unique	2.72361	High	0	0.0003339
FALSE	High	[K].GVGSDEEEELNMK.[Q]	2xTMT6plex [N-Term; K13]; 1xPhospho [S4(100)]	Q10RU8 1xPhospho [S607(100)]	2.21866e-05	0	1	1	4	Q10RU8	Q10RU8 [604-616]	0	1974.91	High	High	High	High	High	High	High	High	High	S4(Phospho): 100	1	0.939895	0.938417	0.998797	0.932926	0.883476	1.16765	1.20728	1.15691	4	4	4	4	4	4	4	4	4	Unique	4.16836	High	0	1.97e-06
FALSE	High	[R].ASSDDTSSSAATGDELIEDLK.[A]	2xTMT6plex [N-Term; K21]; 1xPhospho [S2(99.5)]	Q0DXV3 1xPhospho [S6(99.5)]	4.52791e-12	0	1	1	20	Q0DXV3	Q0DXV3 [5-25]	0	2650.24	High	High	High	High	High	High	High	High	High	S2(Phospho): 99.51	1	1.24338	1.15395	2.07187	1.95935	1.80311	1.41008	1.44643	1.32097	10	10	10	10	10	10	10	10	10	Unique	7.10746	High	0	3.139e-14
FALSE	High	[K].ITFGDSDED.[-]	1xTMT6plex [N-Term]; 1xPhospho [S6(100)]	Q6YS30 1xPhospho [S509(100)]	0.0018213	0	1	2	7	Q6YS30	Q6YS30 [504-512]	0	1307.52	High	High	High	High	High	High	High	High	High	S6(Phospho): 100	1	1.14899	0.884057	1.03105	0.893719	0.823861	1.14019	1.17078	1.17259	7	7	7	7	7	7	7	7	7	Unique	3.15456	High	6.595e-05	0.0006713
FALSE	High	[K].VLYDDDDDDDDDAEQSDGEPPSEEAAR.[S]	1xTMT6plex [N-Term]; 1xPhospho [Y/S]	A0A0P0XN73 1xPhospho [S234(100)]	1.1426e-09	0	1	1	5	A0A0P0XN73	A0A0P0XN73 [219-245]	0	3292.26	High	High	High	High	High	High	High	High	High	S16(Phospho): 100	1	0.847529	0.860216	0.991956	0.98118	1.0203	1.53698	1.3792	1.52606	5	5	5	5	5	5	5	5	5	Unique	4.75839	High	0	1.979e-11
FALSE	High	[R].GESFEDEDSDDDDDMIPK.[A]	2xTMT6plex [N-Term; K18]; 1xPhospho [S9(100)]	Q6Z9J1 1xPhospho [S481(100)]	3.48096e-06	0	1	1	6	Q6Z9J1	Q6Z9J1 [473-490]	0	2597.05	High	High	High	High	High	High	High	High	High	S9(Phospho): 100	1	1.03328	1.06049	1.24117	1.05859	1.05743	1.1364	1.10259	1.08573	6	6	6	6	6	6	6	6	6	Unique	4.51938	High	0	2.279e-07
FALSE	High	[R].GESFEDEDSDDDDDMIPK.[A]	2xTMT6plex [N-Term; K18]; 2xPhospho [S3(100); S9(100)]	Q6Z9J1 2xPhospho [S475(100); S481(100)]	6.82336e-05	0	1	1	2	Q6Z9J1	Q6Z9J1 [473-490]	0	2677.02	High	High	High	High	High	High	High	High	High	S3(Phospho): 100; S9(Phospho): 100	1	1.11245	0.898363	1.02616	0.8334	0.877612	1.21121	1.16406	1.14846	2	2	2	2	2	2	2	2	2	Unique	3.74074	High	0	7.297e-06
FALSE	High	[K].GIDGVGGVGGGAAGLGGGEAGDGGGGVGGAASR.[S]	1xTMT6plex [N-Term]; 1xPhospho [S32(100)]	Q0DKG9 1xPhospho [S39(100)]	4.79087e-11	0	1	2	2	Q0DKG9	Q0DKG9 [8-40]	0	2835.32	High	High	High	High	High	High	High	High	High	S32(Phospho): 100	1	1.07794	0.939371	0.894226	0.987212	1.01834	1.25288	1.08242	1.27513	2	2	2	2	2	2	2	2	2	Unique	6.88918	High	0	4.911e-13
FALSE	High	[K].SVGDLTAADLEGK.[R]	2xTMT6plex [N-Term; K13]; 1xPhospho [S1(100)]	A0A0P0WP33 1xPhospho [S84(100)]	0.0012938	0	1	1	2	A0A0P0WP33	A0A0P0WP33 [84-96]	0	1813.93	High	High	High	High	High	High	High	High	High	S1(Phospho): 100	1	1.05256	0.841142	0.851225	0.910809	0.795519	0.923325	0.961407	1.12916	2	2	2	2	2	2	2	2	2	Unique	3.17606	High	6.595e-05	0.0006574
FALSE	High	[R].TFDYNVISDNTVESPR.[K]	1xTMT6plex [N-Term]; 1xPhospho [S14(100)]	Q0DWG3 1xPhospho [S917(100)]	5.17119e-06	0	1	3	4	Q0DWG3	Q0DWG3 [904-919]	0	2166	High	High	High	High	High	High	High	High	High	S14(Phospho): 100	1	1.19263	0.977518	0.929409	0.887687	0.898135	0.910067	0.982537	1.02903	4	4	4	4	4	4	4	4	4	Unique	4.06001	High	0	3.622e-07
FALSE	High	[R].SMSAPDLHLQQPIK.[K]	2xTMT6plex [N-Term; K14]; 1xPhospho [S3(99.4)]		1.97551e-05	0	1	1	4	Q8H4U8	Q8H4U8 [126-139]	0	2103.11	High	High	High	High	High	High	High	High	High	S3(Phospho): 99.45	1	1.01196	1.01471	1.08969	0.92991	0.829724	0.943212	0.913384	1.023	2	2	2	2	2	2	2	2	2	Unique	4.12292	High	0	1.727e-06
FALSE	High	[K].SYFDSDDSEDELAQR.[K]	1xTMT6plex [N-Term]; 2xPhospho [S5(100); S8(100)]	Q5N8F0 2xPhospho [S947(100); S950(100)]	1.19874e-06	0	1	2	4	Q5N8F0	Q5N8F0 [943-957]	0	2165.82	High	High	High	High	High	High	High	High	High	S5(Phospho): 100; S8(Phospho): 100	1	1.10534	0.943185	0.974364	0.934936	0.914749	1.18564	1.10547	1.31253	4	4	4	4	4	4	4	4	4	Unique	4.5974	High	0	7.233e-07
FALSE	High	[K].SYFDSDDSEDELAQR.[K]	1xTMT6plex [N-Term]; 1xPhospho [S/Y]	Q5N8F0 1xPhospho [S950(100)]	1.54682e-07	0	1	2	13	Q5N8F0	Q5N8F0 [943-957]	0	2085.85	High	High	High	High	High	High	High	High	High	S8(Phospho): 100	1	1.10534	1.00231	1.13855	1.05457	0.95775	1.28129	1.2044	1.22085	10	10	10	10	10	10	10	10	10	Unique	5.0044	High	0	2.469e-08
FALSE	High	[R].SELSPSPIQAPATPK.[A]	2xTMT6plex [N-Term; K15]; 2xPhospho [S6(99.4); T13(100)]	A0A0P0WIK5 2xPhospho [S591(99.3); T598(100)]	1.92407e-05	0	1	1	5	A0A0P0WIK5	A0A0P0WIK5 [586-600]	0	2141.07	High	High	High	High	High	High	High	High	High	S6(Phospho): 99.42; T13(Phospho): 100	1	1.03632	1.0519	1.11509	1.07668	1.13464	1.20553	1.1727	1.20878	5	5	5	5	5	5	5	5	5	Unique	4.18575	High	0	9.833e-06
FALSE	High	[R].SELSPSPIQAPATPK.[A]	2xTMT6plex [N-Term; K15]; 1xPhospho [T13(100)]	A0A0P0WIK5 1xPhospho [T598(100)]	0.000505782	0	1	1	2	A0A0P0WIK5	A0A0P0WIK5 [586-600]	0	2061.1	High	High	High	High	High	High	High	High	High	T13(Phospho): 100	1	1.13478	1.17302	1.09262	1.15711	0.891294	1.24152	1.01327	1.27151	2	2	2	2	2	2	2	2	2	Unique	3.5614	High	0	7.586e-05
FALSE	High	[R].LPEGNLNNDAALSSEK.[T]	2xTMT6plex [N-Term; K16]; 1xPhospho [S13(99.6)]	Q0DY26 1xPhospho [S16(99.6)]	0.0001671	0	1	1	4	Q0DY26	Q0DY26 [4-19]	0	2210.11	High	High	High	High	High	High	High	High	High	S13(Phospho): 99.62	1	1.1297	1.01376	0.968501	0.88266	0.903022	1.5152	1.33598	1.4211	2	2	2	2	2	2	2	2	2	Unique	3.95915	High	0	2.083e-05
FALSE	High	[R].ADCSPGLDNEIPITR.[T]	1xTMT6plex [N-Term]; 1xCarbamidomethyl [C3]; 1xPhospho [S4(100)]	A0A0P0XAP5 1xPhospho [S365(100)]	0.00027974	0	1	1	3	A0A0P0XAP5	A0A0P0XAP5 [362-376]	0	1966.91	High	High	High	High	High	High	High	High	High	S4(Phospho): 100	1	1.12767	0.78106	1.10044	0.975149	0.821906	1.13261	0.976774	1.1545	3	3	3	3	3	3	3	3	3	Unique	3.1743	High	0	3.8e-05
FALSE	High	[K].LLLTPAGGTDNDGEGTVERPSK.[R]	2xTMT6plex [N-Term; K22]; 1xPhospho [T9(100)]	B9FJG3 1xPhospho [T137(99.1)]	1.81217e-07	0	1	1	11	B9FJG3	B9FJG3 [129-150]	0	2765.41	High	High	High	High	High	High	High	High	High	T9(Phospho): 100	1	1.1297	0.896455	1.13171	1.04451	0.958728	1.10041	1.09587	1.10624	10	10	10	10	10	10	10	10	10	Unique	5.88622	High	0	8.979e-09
FALSE	High	[R].VQSISDLEK.[K]	2xTMT6plex [N-Term; K9]; 1xPhospho [S3(100)]	Q10NQ3 1xPhospho [S337(100)]	0.000244027	0	1	1	6	Q10NQ3	Q10NQ3 [335-343]	0	1556.83	High	High	High	High	High	High	High	High	High	S3(Phospho): 100	1	1.15609	0.908853	1.05157	0.903772	0.82777	1.08621	1.16214	1.16415	6	6	6	6	6	6	6	6	6	Unique	3.60283	High	0	3.239e-05
FALSE	High	[K].KEEAKEESDDDMGFSLFD.[-]	3xTMT6plex [N-Term; K1; K5]; 1xPhospho [S8(100)]	Q69UI8 1xPhospho [S100(100)]	4.20069e-08	0	1	1	29	Q69UI8	Q69UI8 [93-110]	2	2859.33	High	High	High	High	High	High	High	High	High	S8(Phospho): 100	1	1.04952	1.04427	1.10825	1.00933	0.939182	1.00761	0.94796	1.03145	29	29	29	29	29	29	29	29	29	Unique	5.96918	High	0	9.697e-09
FALSE	High	[K].MAAMSPVVAPGTPSGGGGGAGSFK.[S]	2xTMT6plex [N-Term; K24]; 2xPhospho [S5(100); S14(99.5)]	Q9ST27 2xPhospho [S278(100); S295(100)]	8.91606e-10	0	1	2	16	Q9ST27	Q9ST27 [274-297]	0	2709.26	High	High	High	High	High	High	High	High	High	S5(Phospho): 100; T12(Phospho): 100	1	1.09113	1.0891	1.12878	1.04653	1.02616	1.0578	1.07666	1.15208	14	14	14	14	14	14	14	14	14	Unique	6.35187	High	0	1.482e-11
FALSE	High	[K].MAAMSPVVAPGTPSGGGGGAGSFK.[S]	2xTMT6plex [N-Term; K24]; 1xOxidation [M1(100)]; 1xPhospho [S22(100)]	Q9ST27 1xPhospho [S295(100)]	5.45141e-06	0	1	2	15	Q9ST27	Q9ST27 [274-297]	0	2645.29	High	High	High	High	High	High	High	High	High	M4(Oxidation): 99.98; S22(Phospho): 100	1	1.10839	0.885011	1.16005	1.10081	1.03887	1.26519	1.26395	1.2124	10	10	10	10	10	10	10	10	10	Unique	5.20918	High	0	7.135e-07
FALSE	High	[K].MAAMSPVVAPGTPSGGGGGAGSFK.[S]	2xTMT6plex [N-Term; K24]; 1xPhospho [S5(100)]	Q9ST27 1xPhospho [S278(100)]	7.9807e-10	0	1	2	9	Q9ST27	Q9ST27 [274-297]	0	2629.29	High	High	High	High	High	High	High	High	High	S5(Phospho): 100	1	1.10128	1.03855	1.1278	1.11891	1.09457	1.15723	1.17847	1.18707	9	9	9	9	9	9	9	9	9	Unique	6.68497	High	0	1.306e-11
FALSE	High	[R].SVIIEDAPEQHQHPAGLFDGEK.[D]	2xTMT6plex [N-Term; K22]; 1xPhospho [S1(100)]	A3C592 1xPhospho [S330(100)]	1.06514e-08	0	1	1	2	A3C592	A3C592 [330-351]	0	2955.47	High	High	High	High	High	High	High	High	High	S1(Phospho): 100	1	1.17842	0.93651	0.999774	0.877634	0.844384	0.878816	0.899938	0.875824	2	2	2	2	2	2	2	2	2	Unique	5.87008	High	0	2.679e-10
FALSE	High	[K].KEEAKEESDDDMGFSLFD.[-]	3xTMT6plex [N-Term; K1; K5]; 1xOxidation [M12(100)]; 1xPhospho [S8(100)]	Q69UI8 1xPhospho [S100(100)]	2.70639e-07	0	1	1	16	Q69UI8	Q69UI8 [93-110]	2	2875.32	High	High	High	High	High	High	High	High	High	S8(Phospho): 100; M12(Oxidation): 100	1	1.01704	1.0128	1.07209	1.06161	0.97241	1.0417	0.921068	1.0037	16	16	16	16	16	16	16	16	16	Unique	5.99452	High	0	1.162e-08
FALSE	High	[R].SSSSSSSSSDEEEEVIDDNGEVVK.[R]	2xTMT6plex [N-Term; K24]; 3xPhospho [S5(98.3); S7(97.5); S]	Q6ESR4 3xPhospho [S86(98.3); S88(97.5); S]	0.000149612	0	1	1	3	Q6ESR4	Q6ESR4 [82-105]	0	3200.27	High	High	High	High	High	High	High	High	High	S2(Phospho): 49.57; S3(Phospho): 49.57; S5(Phospho): 98.3; S7(Phospho): 97.48	1	1.36315	1.35327	1.03593	1.17923	0.934295	1.04644	1.11892	1.34269	1	1	1	1	1	1	1	1	1	Unique	2.84547	High	0	1.907e-05
FALSE	High	[R].SSSSSSSSSDEEEEVIDDNGEVVK.[R]	2xTMT6plex [N-Term; K24]; 1xPhospho [S1(98.8)]	Q6ESR4 1xPhospho [S82(98.8)]	5.79604e-08	0	1	1	10	Q6ESR4	Q6ESR4 [82-105]	0	3040.34	High	High	High	High	High	High	High	High	High	S1(Phospho): 98.81	1	1.02313	1.28079	0.886408	0.894724	0.973387	1.08905	0.934514	1.02783	2	2	2	2	2	2	2	2	2	Unique	4.75166	High	0	3.11e-09
FALSE	High	[K].QTEDRSQSYVSWDIK.[S]	2xTMT6plex [N-Term; K15]; 2xPhospho [S6(100); S11(100)]	Q2QW32 2xPhospho [S602(100); S604(100)]	2.02832e-05	0	1	1	3	Q2QW32	Q2QW32 [597-611]	1	2460.12	High	High	High	High	High	High	High	High	High	S6(Phospho): 99.99; S8(Phospho): 99.99	1	1.22613	0.852586	1.23726	1.12796	1.03984	1.06443	1.08434	1.08573	2	2	2	2	2	2	2	2	2	Unique	4.01079	High	0	7.252e-06
FALSE	High	[K].QTEDRSQSYVSWDIK.[S]	2xTMT6plex [N-Term; K15]; 1xPhospho [S6(99.3)]	Q2QW32 1xPhospho [S602(100)]	0.00122272	0	1	1	3	Q2QW32	Q2QW32 [597-611]	1	2380.16	High	High	High	High	High	High	High	High	High	S6(Phospho): 99.34	1	1.31951	0.905992	1.17471	0.924883	0.927454	0.950788	1.10643	0.978366	2	2	2	2	2	2	2	2	2	Unique	3.04172	High	0	0.0002142
FALSE	High	[R].EAAPTAAPVSPAASGGGGGQIWSATR.[I]	1xTMT6plex [N-Term]; 1xPhospho [S10(100)]	Q7XIJ5 1xPhospho [S123(100)]	1.6863e-05	0	1	1	2	Q7XIJ5	Q7XIJ5 [114-139]	0	2676.3	High	High	High	High	High	High	High	High	High	S10(Phospho): 100	1	0.901325	0.985147	1.04473	1.14102	1.18057	1.47069	1.27355	1.51279	2	2	2	2	2	2	2	2	2	Unique	4.0271	High	0	1.433e-06
FALSE	High	[R].APADAALLTPPKMSDADK.[M]	3xTMT6plex [N-Term; K12; K18]; 1xOxidation [M13(100)]; 2xPhospho [T9(100); S14(100)]	Q9ST27 2xPhospho [T264(100); S269(100)]	1.07683e-05	0	1	2	19	Q9ST27	Q9ST27 [256-273]	1	2675.34	High	High	High	High	High	High	High	High	High	T9(Phospho): 100; M13(Oxidation): 100; S14(Phospho): 100	1	0.950045	1.11389	1.1278	1.10182	1.07893	1.20269	1.11604	1.23894	19	19	19	19	19	19	19	19	19	Unique	4.7313	High	0	8.512e-07
FALSE	High	[R].APADAALLTPPKMSDADK.[M]	3xTMT6plex [N-Term; K12; K18]; 2xPhospho [T9(100); S14(100)]	Q9ST27 2xPhospho [T264(100); S269(100)]	3.88098e-08	0	1	2	26	Q9ST27	Q9ST27 [256-273]	1	2659.34	High	High	High	High	High	High	High	High	High	T9(Phospho): 100; S14(Phospho): 100	1	0.990645	1.27411	1.15614	1.0425	1.14246	1.07106	1.05169	1.16415	26	26	26	26	26	26	26	26	26	Unique	6.94814	High	0	1.207e-09
FALSE	High	[R].GESFEDEDSDDDDDMIPK.[A]	2xTMT6plex [N-Term; K18]; 1xOxidation [M15(100)]; 1xPhospho [S9(100)]	Q6Z9J1 1xPhospho [S481(100)]	0.000106797	0	1	1	4	Q6Z9J1	Q6Z9J1 [473-490]	0	2613.05	High	High	High	High	High	High	High	High	High	S9(Phospho): 100; M15(Oxidation): 100	1	1.06068	1.05763	1.23433	1.2124	1.19523	1.61937	1.47621	1.76371	4	4	4	4	4	4	4	4	4	Unique	3.64233	High	0	4.879e-05
FALSE	High	[R].LTFDEIQSK.[T]	2xTMT6plex [N-Term; K9]; 1xPhospho [S8(100)]	Q943W1 1xPhospho [S100(100)]	0.0012938	0	1	1	1	Q943W1	Q943W1 [93-101]	0	1618.85	High	High	High	High	High	High	High	High	High	S8(Phospho): 100	1	1.05561	0.933649	1.02225	0.866575	0.938204	0.826731	0.874967	0.891507	1	1	1	1	1	1	1	1	1	Unique	3.09802	High	0	0.0002298
FALSE	High	[R].ISPGSSEPAASLPSPVTTK.[V]	2xTMT6plex [N-Term; K19]; 2xPhospho [S2(100); S14(100)]	Q0D5J1 2xPhospho [S377(100); S389(100)]	6.25311e-06	0	1	1	15	Q0D5J1	Q0D5J1 [376-394]	0	2444.21	High	High	High	High	High	High	High	High	High	S2(Phospho): 99.99; S14(Phospho): 100	1	0.966285	0.994684	0.940159	1.03245	0.99391	1.09094	1.07762	1.12313	11	11	11	11	11	11	11	11	11	Unique	5.14257	High	0	4.524e-07
FALSE	High	[R].TVSSGISGASYYTGTFNTVNR.[S]	1xTMT6plex [N-Term]; 1xPhospho [S3(99)]	A0A0P0X1D1 1xPhospho [S227(98.8)]	1.37375e-12	0	1	2	11	A0A0P0X1D1	A0A0P0X1D1 [225-245]	0	2491.17	High	High	High	High	High	High	High	High	High	S3(Phospho): 99.01	1	1.24947	1.03951	1.20989	1.21743	1.12389	1.2311	1.12372	1.10986	4	4	4	4	4	4	4	4	4	Unique	7.61447	High	0	7.823e-15
FALSE	High	[K].SLQIEDLSASQSFQESSSPK.[M]	2xTMT6plex [N-Term; K20]; 1xPhospho [S18(99.2)]	Q10N72 1xPhospho [S687(99.2)]	1.14681e-08	0	1	1	2	Q10N72	Q10N72 [670-689]	0	2706.33	High	High	High	High	High	High	High	High	High	S18(Phospho): 99.22	1	1.14087	1.15109	1.32912	1.16817	1.04278	1.05875	1.1122	1.2872	1	1	1	1	1	1	1	1	1	Unique	4.89451	High	0	2.924e-10
FALSE	High	[K].AVIPAPAPPAEEEKPPVDDSK.[A]	3xTMT6plex [N-Term; K14; K21]; 1xPhospho [S20(100)]	Q7XMK5 1xPhospho [S57(100)]	0.000544184	0	1	1	3	Q7XMK5	Q7XMK5 [38-58]	0	2924.56	High	High	High	High	High	High	High	High	High	S20(Phospho): 100	1	1.10534	0.893594	1.0848	0.904777	0.927454	1.29834	1.18135	1.11348	3	3	3	3	3	3	3	3	3	Unique	3.98348	High	0	8.272e-05
FALSE	High	[K].AEGVDLSAYGSSK.[V]	2xTMT6plex [N-Term; K13]; 1xPhospho [S11(99.6)]	Q2R1V8 1xPhospho [S349(99.5)]	2.77425e-06	0	1	1	7	Q2R1V8	Q2R1V8 [339-351]	0	1821.9	High	High	High	High	High	High	High	High	High	S11(Phospho): 99.51	1	1.04343	0.762941	1.00271	0.802236	0.712449	0.79548	0.92491	0.792585	4	4	4	4	4	4	4	4	4	Unique	4.20501	High	0	1.745e-07
FALSE	High	[R].GDRSPSLDGADDQMFDAFR.[G]	1xTMT6plex [N-Term]; 1xPhospho [S4(100)]	Q5Z4U6 1xPhospho [S599(100)]	1.93065e-07	0	1	1	2	Q5Z4U6	Q5Z4U6 [596-614]	1	2409.04	High	High	High	High	High	High	High	High	High	S4(Phospho): 100	1	1.1226	1.15585	1.12291	1.22245	1.06916	1.16481	1.45796	1.32459	2	2	2	2	2	2	2	2	2	Unique	4.72963	High	0	7.846e-09
FALSE	High	[K].LALTPAVGTDNDGEGTVERPSK.[R]	2xTMT6plex [N-Term; K22]; 2xPhospho [T4(100); T9(100)]	Q6AVI0 2xPhospho [T132(100); T137(100)]	0.000538527	0	1	1	1	Q6AVI0	Q6AVI0 [129-150]	0	2845.38	High	High	High	High	High	High	High	High	High	T4(Phospho): 100; T9(Phospho): 100	1	0.883055	0.947954	0.741768	0.85049	0.7662	1.09852	1.02576	0.878237	1	1	1	1	1	1	1	1	1	Unique	3.31481	High	0	8.174e-05
FALSE	High	[K].LALTPAVGTDNDGEGTVERPSK.[R]	2xTMT6plex [N-Term; K22]; 1xPhospho [T9(100)]	Q6AVI0 1xPhospho [T137(100)]	3.03814e-10	0	1	1	31	Q6AVI0	Q6AVI0 [129-150]	0	2765.41	High	High	High	High	High	High	High	High	High	T9(Phospho): 100	1	1.11955	0.873567	1.18644	1.13399	1.05841	1.07579	1.19672	1.05195	31	31	31	31	31	31	31	31	31	Unique	7.1196	High	0	4.248e-12
FALSE	High	[R].SAEMGTELGSPLGR.[F]	1xTMT6plex [N-Term]; 1xPhospho [S10(100)]	Q337D8 1xPhospho [S181(100)]	8.88096e-05	0	1	1	5	Q337D8	Q337D8 [172-185]	0	1713.81	High	High	High	High	High	High	High	High	High	S10(Phospho): 100	1	0.94903	0.854493	0.869794	0.777103	0.867839	0.849459	0.850955	0.948206	5	5	5	5	5	5	5	5	5	Unique	3.77617	High	0	9.918e-06
FALSE	High	[R].DPPPSPPNPSEEAGAGEEMEAEGEGEEEVK.[T]	2xTMT6plex [N-Term; K30]; 1xOxidation [M19(100)]; 1xPhospho [S5(100)]	Q6Z4S6 1xPhospho [S21(100)]	0.00150863	0	1	1	2	Q6Z4S6	Q6Z4S6 [17-46]	0	3648.58	High	High	High	High	High	High	High	High	High	S5(Phospho): 100; M19(Oxidation): 100	1	1.13275	1.04904	1.16885	1.15007	1.13562	1.35232	1.384	1.46815	2	2	2	2	2	2	2	2	2	Unique	3.30611	High	0	0.0002757
FALSE	High	[R].DPPPSPPNPSEEAGAGEEMEAEGEGEEEVK.[T]	2xTMT6plex [N-Term; K30]; 1xPhospho [S5(100)]	Q6Z4S6 1xPhospho [S21(100)]	4.56348e-07	0	1	1	3	Q6Z4S6	Q6Z4S6 [17-46]	0	3632.59	High	High	High	High	High	High	High	High	High	S5(Phospho): 100	1	1.15508	1.09101	1.12096	1.07266	1.07014	1.2633	1.2505	1.31012	3	3	3	3	3	3	3	3	3	Unique	5.37047	High	0	2.128e-08
FALSE	High	[K].GVSKPSQDTEEDDEPEVELESK.[K]	3xTMT6plex [N-Term; K4; K22]; 2xPhospho [S6(100); T9(100)]	Q5JKH1 2xPhospho [S331(100); T334(100)]	1.93425e-05	0	1	2	2	Q5JKH1	Q5JKH1 [326-347]	0	3294.52	High	High	High	High	High	High	High	High	High	S6(Phospho): 100; T9(Phospho): 100	1	1.13681	1.05477	1.2568	1.22748	1.27049	1.27182	1.34366	1.23894	2	2	2	2	2	2	2	2	2	Unique	4.72179	High	0	1.678e-06
FALSE	High	[K].GVSKPSQDTEEDDEPEVELESK.[K]	3xTMT6plex [N-Term; K4; K22]; 1xPhospho [T9(98.8)]	Q5JKH1 1xPhospho [T334(100)]	4.80082e-09	0	1	2	25	Q5JKH1	Q5JKH1 [326-347]	0	3214.55	High	High	High	High	High	High	High	High	High	T9(Phospho): 100	1	1.10636	1.05667	1.33987	1.27674	1.24898	1.41576	1.42242	1.37888	16	16	16	16	16	16	16	16	16	Unique	5.82458	High	0	1.055e-10
FALSE	High	[K].HNAPADVPDEPIEGLSDDEGDAPAK.[N]	2xTMT6plex [N-Term; K25]; 1xPhospho [S16(100)]	Q5Z9N4 1xPhospho [S86(100)]	2.87139e-11	0	1	1	18	Q5Z9N4	Q5Z9N4 [71-95]	0	3097.44	High	High	High	High	High	High	High	High	High	S16(Phospho): 100	1	1.09113	1.02043	1.05841	0.871602	0.92159	1.20837	1.0709	1.19431	18	18	18	18	18	18	18	18	18	Unique	6.46201	High	0	2.713e-13
FALSE	High	[K].QDGDEVVDSNVLQYCSIDGK.[G]	2xTMT6plex [N-Term; K20]; 1xCarbamidomethyl [C15]; 1xPhospho [S16(100)]	Q84M73 1xPhospho [S81(100)]	3.74443e-12	0	1	1	15	Q84M73	Q84M73 [66-85]	0	2779.29	High	High	High	High	High	High	High	High	High	S16(Phospho): 100	1	0.915535	0.947	1.31935	1.81056	1.76695	2.24818	2.69501	2.74932	14	14	14	14	14	14	14	14	14	Unique	6.44768	High	0	1.014e-13
FALSE	High	[K].EVAGAAADLLHSASTYGK.[L]	2xTMT6plex [N-Term; K18]; 1xPhospho [S14(99.5)]	Q7G649 1xPhospho [S52(99.5)]	1.34291e-11	0	1	1	10	Q7G649	Q7G649 [39-56]	0	2299.17	High	High	High	High	High	High	High	High	High	S14(Phospho): 100	1	1.26977	0.707627	1.24605	0.939963	0.883476	0.777487	0.769317	0.815506	4	4	4	4	4	4	4	4	4	Unique	7.0986	High	0	1.116e-13
FALSE	High	[K].KEEPEEESDGDLGMSLFD.[-]	2xTMT6plex [N-Term; K1]; 1xPhospho [S8(100)]	Q2QY46 1xPhospho [S310(100)]	1.80925e-06	0	1	4	10	Q2QY46	Q2QY46 [303-320]	1	2565.14	High	High	High	High	High	High	High	High	High	S8(Phospho): 100	1	1.05256	0.868799	1.04571	0.905782	0.937227	0.951735	1.01807	1.00611	10	10	10	10	10	10	10	10	10	Unique	3.74451	High	0	1.792e-05
FALSE	High	[R].SQDDAATLIPNSGNLGSSNR.[S]	1xTMT6plex [N-Term]; 2xPhospho [S12(100); S/T]	Q5ZAJ0 2xPhospho [S32(100); S/T]	1.58562e-06	0	1	1	10	Q5ZAJ0	Q5ZAJ0 [21-40]	0	2406.05	High	High	High	High	High	High	High	High	High	S12(Phospho): 100; S17(Phospho): 50; S18(Phospho): 50	1	1.09418	1.00613	0.945045	0.893719	0.901067	1.90063	2.64603	2.65763	7	7	7	7	7	7	7	7	7	Unique	4.11151	High	0	9.136e-08
FALSE	High	[K].GLMPGGSGLDQNNGSPK.[A]	2xTMT6plex [N-Term; K17]; 1xPhospho [S15(100)]	Q67IU4 1xPhospho [S458(100)]	0.000309082	0	1	1	5	Q67IU4	Q67IU4 [444-460]	0	2167.06	High	High	High	High	High	High	High	High	High	S15(Phospho): 100	1	0.964255	0.865938	0.989024	0.890703	0.946023	1.13166	1.09011	1.10986	5	5	5	5	5	5	5	5	5	Unique	3.41386	High	0	6.633e-05
FALSE	High	[K].KEEPEEESDGDLGMSLFD.[-]	2xTMT6plex [N-Term; K1]; 1xOxidation [M14(100)]; 1xPhospho [S8(100)]	Q2QY46 1xPhospho [S310(100)]	7.52158e-06	0	1	4	12	Q2QY46	Q2QY46 [303-320]	1	2581.13	High	High	High	High	High	High	High	High	High	S8(Phospho): 100; M14(Oxidation): 100	1	1.07591	0.962259	1.10239	0.984196	0.973387	1.10231	1.04881	1.12675	12	12	12	12	12	12	12	12	12	Unique	4.72753	High	0	5.586e-07
FALSE	High	[R].SGSSGLVWDER.[LF]	1xTMT6plex [N-Term]; 1xPhospho [S3(99.5)]	Q69XK9 1xPhospho [S17(99.7)]	0.00062006	0	1	2	6	Q69XK9	Q69XK9 [15-25]	0	1501.69	High	High	High	High	High	High	High	High	High	S3(Phospho): 99.53	1	0.89219	0.745774	0.736881	0.741917	0.79161	0.649642	0.762594	0.833601	4	4	4	4	4	4	4	4	4	Unique	3.69052	High	0	9.642e-05
FALSE	High	[R].VSHAEDPYANFDDSDDSATR.[K]	1xTMT6plex [N-Term]; 2xPhospho [S14(100); S17(99)]		1.96865e-06	0	1	1	2	A0A0P0VU40	A0A0P0VU40 [387-406]	0	2601	High	High	High	High	High	High	High	High	High	S14(Phospho): 99.99; S17(Phospho): 98.97	1	0.89219	0.947	1.08969	1.0234	0.997819	1.05685	0.997904	1.19913	2	2	2	2	2	2	2	2	2	Unique	4.69914	High	0	1.176e-07
FALSE	High	[K].QVNNVEGVTEQLTDNEK.[E]	2xTMT6plex [N-Term; K17]; 1xPhospho [T13(100)]	Q5N861 1xPhospho [T778(100)]	1.96053e-10	0	1	2	4	Q5N861	Q5N861 [766-782]	0	2455.21	High	High	High	High	High	High	High	High	High	T13(Phospho): 100	1	1.03328	0.907899	1.12487	0.927899	0.906931	1.09947	1.06513	1.11469	4	4	4	4	4	4	4	4	4	Unique	5.85756	High	0	2.549e-12
FALSE	High	[K].GSPVESVSSSPLK.[N]	2xTMT6plex [N-Term; K13]; 2xPhospho [S2(100); S]	A0A0P0VY74 2xPhospho [S472(100); S480(99.3)]	0.00149329	0	1	1	4	A0A0P0VY74	A0A0P0VY74 [471-483]	0	1891.92	High	High	High	High	High	High	High	High	High	S2(Phospho): 100; S6(Phospho): 99.99	1	1.05155	0.779153	0.843407	0.838427	0.852202	0.971622	1.04785	1.03265	4	4	4	4	4	4	4	4	4	Unique	3.44126	High	0	0.0002719
FALSE	High	[K].GLAYDISDDQQDITR.[G]	1xTMT6plex [N-Term]; 1xPhospho [T14(100)]	A0A0P0Y677 1xPhospho [T25(100)]; P93431 1xPhospho [T77(100)]	4.42805e-05	0	2	3	3	A0A0P0Y677; P93431	A0A0P0Y677 [12-26]; P93431 [64-78]	0	2018.93	High	High	High	High	High	High	High	High	High	T14(Phospho): 100	1	1.01298	0.967981	0.952864	1.08171	0.977296	1.08337	0.917226	1.1557	3	3	3	3	3	3	3	3	3	Not Unique	3.84719	High	0	4.42e-06
FALSE	High	[R].NQPGNPNPDAEVIALSPR.[T]	1xTMT6plex [N-Term]; 1xPhospho [S16(100)]	B7ERE7 1xPhospho [S66(100)]	1.48049e-06	0	1	2	4	B7ERE7	B7ERE7 [51-68]	0	2198.08	High	High	High	High	High	High	High	High	High	S16(Phospho): 100	1	1.01704	0.949861	0.99391	1.03044	1.18351	1.17239	1.14485	1.3065	4	4	4	4	4	4	4	4	4	Unique	5.11282	High	0	1.567e-07
FALSE	High	[R].GGLDFTKDDENVNSQPFMR.[W]	2xTMT6plex [N-Term; K7]; 1xPhospho [S14(100)]	P0C512 1xPhospho [S208(100)]	0.000178933	0	1	4	1	P0C512	P0C512 [195-213]	1	2708.28	High	High	High	High	High	High	High	High	High	S14(Phospho): 100	1	1.06779	1.12438	1.2353	1.33605	1.3213	1.53887	1.35231	1.26066	1	1	1	1	1	1	1	1	1	Unique	3.63865	High	0	2.246e-05
FALSE	High	[K].SLQIEDLSASQSFQESSSPK.[M]	2xTMT6plex [N-Term; K20]; 2xPhospho [S17(100); S18(100)]	Q10N72 2xPhospho [S686(100); S687(100)]	5.20709e-07	0	1	1	3	Q10N72	Q10N72 [670-689]	0	2786.29	High	High	High	High	High	High	High	High	High	S17(Phospho): 99.99; S18(Phospho): 100	1	0.994705	0.947	0.984137	0.995255	0.948955	1.09379	1.04208	1.12675	3	3	3	3	3	3	3	3	3	Unique	4.22267	High	0	2.489e-08
FALSE	High	[K].TSCGSPNYAAPEVISGK.[L]	2xTMT6plex [N-Term; K17]; 1xCarbamidomethyl [C3]; 1xPhospho [T1(99.6)]	Q10MY9 1xPhospho [T216(99.6)]	5.85754e-08	0	1	5	12	Q10MY9	Q10MY9 [216-232]	0	2276.1	High	High	High	High	High	High	High	High	High	T1(Phospho): 99.59	1	1.06474	0.990869	1.20696	1.24759	1.31837	1.20837	1.54248	1.40421	5	5	5	5	5	5	5	5	5	Unique	5.59582	High	0	1.951e-09
FALSE	High	[R].LMSIGSNEAGPR.[R]	1xTMT6plex [N-Term]; 1xPhospho [S3(100)]	Q5Z9S8 1xPhospho [S873(100)]	8.03469e-05	0	1	1	8	Q5Z9S8	Q5Z9S8 [871-882]	0	1540.74	High	High	High	High	High	High	High	High	High	S3(Phospho): 100	1	1.01196	0.931741	0.933318	0.748954	0.718313	0.720667	0.706888	0.698488	8	8	8	8	8	8	8	8	8	Unique	3.46036	High	0	1.595e-05
FALSE	High	[K].TIAPDIAPTGSDNEDREEGNAIDTTK.[E]	2xTMT6plex [N-Term; K26]; 1xPhospho [S11(99.4)]	Q5ZBT1 1xPhospho [S255(99.4)]	0.000379233	0	1	1	4	Q5ZBT1	Q5ZBT1 [245-270]	1	3268.56	High	High	High	High	High	High	High	High	High	S11(Phospho): 99	1	1.03632	1.02329	1.13855	1.06261	1.11119	1.33811	1.21977	1.26669	2	2	2	2	2	2	2	2	2	Unique	4.1169	High	0	5.429e-05
FALSE	High	[K].DGFIVDDADEEEEEEDERESDDER.[R]	1xTMT6plex [N-Term]; 1xPhospho [S20(100)]	A0A0P0WP66 1xPhospho [S74(100)]	1.38833e-12	0	1	1	6	A0A0P0WP66	A0A0P0WP66 [55-78]	1	3181.23	High	High	High	High	High	High	High	High	High	S20(Phospho): 100	1	0.732834	0.572205	0.565854	0.629323	0.54924	0.720667	0.763555	1.07488	6	6	6	6	6	6	6	6	6	Unique	6.72742	High	0	7.948e-15
FALSE	High	[K].SALQASIISP.[-]	1xTMT6plex [N-Term]; 1xPhospho [S9(100)]	Q7Y0V7 1xPhospho [S871(100)]	1.50942e-05	0	1	1	9	Q7Y0V7	Q7Y0V7 [863-872]	0	1295.68	High	High	High	High	High	High	High	High	High	S9(Phospho): 100	1	1.21598	1.06907	1.07405	0.972133	1.06134	1.06443	1.04785	1.07005	9	9	9	9	9	9	9	9	9	Unique	3.99564	High	0	1.593e-06
FALSE	High	[K].WTLDGEESDEEGNQEDGKK.[S]	3xTMT6plex [N-Term; K18; K19]; 1xPhospho [S8(100)]	Q84UQ1 1xPhospho [S233(100)]	3.41379e-07	0	1	1	7	Q84UQ1	Q84UQ1 [226-244]	1	2933.37	High	High	High	High	High	High	High	High	High	S8(Phospho): 100	1	0.89219	0.95749	0.903022	0.937952	0.860998	0.93753	1.01615	1.02541	7	7	7	7	7	7	7	7	7	Unique	4.06987	High	0	7.818e-07
FALSE	High	[K].SQSVWGQLSDGGDTSGR.[R]	1xTMT6plex [N-Term]; 1xPhospho [S9(100)]	Q10C73 1xPhospho [S417(100)]; Q8LI88 1xPhospho [S410(100)]	3.56672e-08	0	2	3	9	Q10C73; Q8LI88	Q10C73 [409-425]; Q8LI88 [402-418]	0	2045.91	High	High	High	High	High	High	High	High	High	S9(Phospho): 100	1	1.10534	1.01662	1.07014	1.03949	1.05059	1.30307	1.17943	1.39698	9	9	9	9	9	9	9	9	9	Not Unique	4.74479	High	0	1.093e-09
FALSE	High	[R].EAAADLSELSEGEK.[D]	2xTMT6plex [N-Term; K14]; 2xPhospho [S7(100); S10(100)]	Q53JI9 2xPhospho [S45(100); S48(100)]	1.37504e-06	0	1	1	35	Q53JI9	Q53JI9 [39-52]	0	2066.93	High	High	High	High	High	High	High	High	High	S7(Phospho): 100; S10(Phospho): 100	1	1.03937	0.851632	0.987069	0.88065	0.880544	0.958364	1.01999	1.08815	35	35	35	35	35	35	35	35	35	Unique	5.00866	High	0	1.306e-07
FALSE	High	[R].EAAADLSELSEGEK.[D]	2xTMT6plex [N-Term; K14]; 1xPhospho [S10(100)]	Q53JI9 1xPhospho [S48(100)]	3.77385e-07	0	1	1	10	Q53JI9	Q53JI9 [39-52]	0	1986.97	High	High	High	High	High	High	High	High	High	S10(Phospho): 99.45	1	0.860725	0.885965	0.967523	0.926894	0.982183	0.948894	1.03632	0.902364	10	10	10	10	10	10	10	10	10	Unique	4.72091	High	0	1.707e-08
FALSE	High	[R].SFYDGDDPDHLYGSDDGQPR.[K]	1xTMT6plex [N-Term]; 1xPhospho [S14(100)]	Q10E16 1xPhospho [S92(100)]	4.12135e-06	0	1	1	6	Q10E16	Q10E16 [79-98]	0	2565.04	High	High	High	High	High	High	High	High	High	S14(Phospho): 100	1	1.01196	0.895502	1.01248	1.01737	0.859043	1.25951	1.18807	1.23653	4	4	4	4	4	4	4	4	4	Unique	4.52405	High	0	2.776e-07
FALSE	High	[K].NNAGEIIGTRFETGEVK.[S]	2xTMT6plex [N-Term; K17]; 2xPhospho [T9(100); T13(100)]	Q6Z411 2xPhospho [T111(100); T115(100)]	9.11054e-07	0	1	1	6	Q6Z411	Q6Z411 [103-119]	1	2453.19	High	High	High	High	High	High	High	High	High	T9(Phospho): 100; T13(Phospho): 100	1	0.85971	0.90027	1.16396	1.05356	1.67118	1.53982	1.64813	1.77819	6	6	6	6	6	6	6	6	6	Unique	5.05643	High	0	4.769e-08
FALSE	High	[K].NNAGEIIGTRFETGEVK.[S]	2xTMT6plex [N-Term; K17]; 1xPhospho [T9(100)]	Q6Z411 1xPhospho [T111(100)]	6.76541e-09	0	1	1	34	Q6Z411	Q6Z411 [103-119]	1	2373.22	High	High	High	High	High	High	High	High	High	T9(Phospho): 100	1	0.97542	1.02425	1.01834	1.01134	1.61352	1.29171	1.47236	1.56345	34	34	34	34	34	34	34	34	34	Unique	6.08873	High	0	1.574e-10
FALSE	High	[K].VTEEEEEEAFQGSDAK.[V]	2xTMT6plex [N-Term; K16]; 1xPhospho [S13(100)]	Q7XB67 1xPhospho [S103(100)]	2.88333e-07	0	1	1	3	Q7XB67	Q7XB67 [91-106]	0	2336.06	High	High	High	High	High	High	High	High	High	S13(Phospho): 100	1	1.11549	1.21403	1.14637	1.2687	1.32619	1.28224	1.33406	1.49952	3	3	3	3	3	3	3	3	3	Unique	4.28717	High	0	1.253e-08
FALSE	High	[K].SNFASDDLPSPTPSGDGDK.[S]	2xTMT6plex [N-Term; K19]; 2xPhospho [S14(100); S/T]	A0A0P0Y2X9 2xPhospho [S411(100); S415(100)]	1.08253e-05	0	1	2	3	A0A0P0Y2X9	A0A0P0Y2X9 [402-420]	0	2525.09	High	High	High	High	High	High	High	High	High	S10(Phospho): 99.99; S14(Phospho): 100	1	1.082	1.18256	1.25485	1.14706	1.20598	1.27561	1.16502	1.2305	2	2	2	2	2	2	2	2	2	Unique	3.61722	High	0	8.546e-07
FALSE	High	[K].SNFASDDLPSPTPSGDGDK.[S]	2xTMT6plex [N-Term; K19]; 1xPhospho [S10(99.2)]	A0A0P0Y2X9 1xPhospho [S411(99.2)]	0.000783787	0	1	2	2	A0A0P0Y2X9	A0A0P0Y2X9 [402-420]	0	2445.12	High	High	High	High	High	High	High	High	High	S10(Phospho): 99.17	1	0.905385	0.86403	1.22162	0.943984	0.820929	1.08716	1.33118	1.31253	1	1	1	1	1	1	1	1	1	Unique	2.91408	High	0	0.0001267
FALSE	High	[K].AIEEDEDNSSDESAGEEVIVR.[V]	1xTMT6plex [N-Term]; 3xPhospho [S9(100); S10(100); S13(100)]	Q5ICN3 3xPhospho [S1118(100); S1119(100); S1122(100)]	6.60289e-07	0	1	2	1	Q5ICN3	Q5ICN3 [1110-1130]	0	2762.06	High	High	High	High	High	High	High	High	High	S9(Phospho): 100; S10(Phospho): 100; S13(Phospho): 100	1	1.03531	1.37425	1.3086	1.09579	1.06916	1.3722	1.41954	1.7432	1	1	1	1	1	1	1	1	1	Unique	3.36421	High	0	3.277e-08
FALSE	High	[K].AIEEDEDNSSDESAGEEVIVR.[V]	1xTMT6plex [N-Term]; 2xPhospho [S9(100); S13(100)]	Q5ICN3 2xPhospho [S1118(100); S1122(100)]	2.29318e-09	0	1	2	2	Q5ICN3	Q5ICN3 [1110-1130]	0	2682.09	High	High	High	High	High	High	High	High	High	S9(Phospho): 100; S10(Phospho): 100	1	1.14797	0.954629	1.07503	0.97917	0.997819	1.25193	1.17655	1.35596	2	2	2	2	2	2	2	2	2	Unique	5.33226	High	0	4.479e-11
FALSE	High	[R].LTSGQQISGEIPDASPDR.[H]	1xTMT6plex [N-Term]; 2xPhospho [S8(100); S15(100)]	Q6AT26 2xPhospho [S159(100); S166(100)]	1.79973e-06	0	1	2	1	Q6AT26	Q6AT26 [152-169]	0	2260.01	High	High	High	High	High	High	High	High	High	S8(Phospho): 100; S15(Phospho): 100	1	1.27282	1.0252	1.13269	1.21944	0.979251	1.19985	1.26779	1.36682	1	1	1	1	1	1	1	1	1	Unique	5.13523	High	0	1.058e-07
FALSE	High	[R].LTSGQQISGEIPDASPDR.[H]	1xTMT6plex [N-Term]; 1xPhospho [S15(100)]	Q6AT26 1xPhospho [S159(100)]	2.69087e-10	0	1	2	9	Q6AT26	Q6AT26 [152-169]	0	2180.04	High	High	High	High	High	High	High	High	High	S15(Phospho): 100	1	1.082	0.949861	0.896181	0.852501	0.840475	0.95647	0.954684	1.07126	9	9	9	9	9	9	9	9	9	Unique	6.49283	High	0	3.682e-12
FALSE	High	[K].TSDSPTGNIIVPAENDK.[S]	2xTMT6plex [N-Term; K17]; 1xPhospho [S4(99.2)]	Q0IVQ5 1xPhospho [S148(99.2)]	4.68329e-10	0	1	2	26	Q0IVQ5	Q0IVQ5 [145-161]	0	2296.15	High	High	High	High	High	High	High	High	High	S4(Phospho): 99.65	1	1.06677	1.1816	1.27439	1.05959	1.09066	1.0578	1.09299	1.08211	9	9	9	9	9	9	9	9	9	Unique	6.42483	High	0	1.825e-11
FALSE	High	[R].LRSPFGSPPK.[VN]	2xTMT6plex [N-Term; K10]; 2xPhospho [S3(100); S7(100)]	A0A0P0VD31 2xPhospho [S184(100); S188(100)]	0.000804414	0	1	2	6	A0A0P0VD31	A0A0P0VD31 [182-191]	1	1703.87	High	High	High	High	High	High	High	High	High	S3(Phospho): 100; S7(Phospho): 100	1	1.13579	1.00517	0.839497	0.855517	0.872725	0.754759	0.789487	0.801029	6	6	6	6	6	6	6	6	6	Unique	3.44127	High	0	0.000131
FALSE	High	[K].ENANLIDADDSDELR.[S]	1xTMT6plex [N-Term]; 1xPhospho [S11(100)]	Q5ZCC0 1xPhospho [S131(100)]	1.6863e-05	0	1	1	3	Q5ZCC0	Q5ZCC0 [121-135]	0	1998.89	High	High	High	High	High	High	High	High	High	S11(Phospho): 100	1	1.1094	1.0767	1.09457	1.16515	1.11705	1.6421	1.45219	1.86022	3	3	3	3	3	3	3	3	3	Unique	3.63564	High	0	1.433e-06
FALSE	High	[R].NVVLDEYGSPK.[V]	2xTMT6plex [N-Term; K11]; 1xPhospho [S9(100)]	Q2QU06 1xPhospho [S81(100)]	0.00027249	0	1	1	4	Q2QU06	Q2QU06 [73-83]	0	1758.91	High	High	High	High	High	High	High	High	High	S9(Phospho): 100	1	0.923655	1.00041	0.854157	0.863559	0.761314	0.996244	0.98926	0.981985	4	4	4	4	4	4	4	4	4	Unique	3.39754	High	0	3.676e-05
FALSE	High	[K].LGPPPPPSGGLPGTLNSDQAR.[D]	1xTMT6plex [N-Term]; 1xPhospho [S17(100)]	Q0D5P8 1xPhospho [S92(100)]	1.23079e-06	0	1	1	3	Q0D5P8	Q0D5P8 [76-96]	0	2337.18	High	High	High	High	High	High	High	High	High	S17(Phospho): 100	1	1.01298	0.751496	0.968501	0.959064	0.93625	1.16102	1.1122	1.20275	2	2	2	2	2	2	2	2	2	Unique	4.95308	High	0	6.768e-08
FALSE	High	[R].LEDYQAPLRPPSPFQGVGR.[T]	1xTMT6plex [N-Term]; 1xPhospho [S12(100)]	Q0JCK5 1xPhospho [S196(100)]	3.72067e-05	0	1	1	3	Q0JCK5	Q0JCK5 [185-203]	0	2436.23	High	High	High	High	High	High	High	High	High	S12(Phospho): 100	1	1.10839	0.846864	0.976319	0.997265	0.865884	1.03034	1.06033	1.20999	3	3	3	3	3	3	3	3	3	Unique	3.74643	High	0	3.612e-06
FALSE	High	[K].NQAGDEESDEEDEDFVADK.[D]	2xTMT6plex [N-Term; K19]; 1xPhospho [S8(100)]	Q9LGR0 1xPhospho [S480(100)]	1.21146e-06	0	1	1	5	Q9LGR0	Q9LGR0 [473-491]	0	2680.12	High	High	High	High	High	High	High	High	High	S8(Phospho): 100	1	0.941925	0.955583	1.16885	1.27272	1.3389	1.80498	2.06208	2.17388	5	5	5	5	5	5	5	5	5	Unique	3.88481	High	0	6.641e-08
FALSE	High	[K].LFGDTAAASESDEPAKEK.[K]	3xTMT6plex [N-Term; K16; K18]; 2xPhospho [S9(100); S11(100)]	Q6ZFM7 2xPhospho [S492(100); S494(100)]	4.20069e-08	0	1	1	1	Q6ZFM7	Q6ZFM7 [484-501]	1	2713.3	High	High	High	High	High	High	High	High	High	S9(Phospho): 100; S11(Phospho): 100	1	0.834334	0.89264	0.727108	0.970122	0.81311	1.77089	2.02846	1.50314	1	1	1	1	1	1	1	1	1	Unique	5.59342	High	0	1.326e-09
FALSE	High	[K].LFGDTAAASESDEPAKEK.[K]	3xTMT6plex [N-Term; K16; K18]; 1xPhospho [S9(100)]	Q6ZFM7 1xPhospho [S492(99.1)]	5.68648e-06	0	1	1	3	Q6ZFM7	Q6ZFM7 [484-501]	1	2633.33	High	High	High	High	High	High	High	High	High	S9(Phospho): 100	1	1.01704	0.962259	1.02225	1.02139	1.00368	1.91862	1.9401	1.61412	2	2	2	2	2	2	2	2	2	Unique	3.97551	High	0	4.043e-07
FALSE	High	[R].LMSIGSNEAGPR.[R]	1xTMT6plex [N-Term]; 2xPhospho [S3(100); S6(100)]	Q5Z9S8 2xPhospho [S873(100); S876(100)]	0.00046517	0	1	1	5	Q5Z9S8	Q5Z9S8 [871-882]	0	1620.71	High	High	High	High	High	High	High	High	High	S3(Phospho): 100; S6(Phospho): 100	1	1.04546	0.877382	0.824838	0.792183	0.702676	0.660059	0.616606	0.626106	5	5	5	5	5	5	5	5	5	Unique	3.39676	High	0	6.875e-05
FALSE	High	[R].ASLGGDDDLLAAQQHK.[A]	2xTMT6plex [N-Term; K16]; 1xPhospho [S2(100)]	Q338G4 1xPhospho [S59(100)]	9.63055e-12	0	1	1	4	Q338G4	Q338G4 [58-73]	0	2177.1	High	High	High	High	High	High	High	High	High	S2(Phospho): 100	1	1.17538	0.963212	1.32815	0.989223	0.963614	0.896809	0.980616	0.997668	4	4	4	4	4	4	4	4	4	Unique	6.38541	High	0	7.582e-14
FALSE	High	[R].AASFNIIPSSTGAAK.[A]	2xTMT6plex [N-Term; K15]; 1xPhospho [S3(100)]	Q7FAH2 1xPhospho [S205(100)]; Q0J8A4 1xPhospho [S205(100)]	2.15344e-06	0	2	4	8	Q7FAH2; Q0J8A4	Q7FAH2 [203-217]; Q0J8A4 [203-217]	0	1973.05	High	High	High	High	High	High	High	High	High	S3(Phospho): 100	1	1.20989	0.786782	1.05255	0.813294	0.846338	1.00287	1.06129	1.03748	7	7	7	7	7	7	7	7	7	Not Unique	4.58462	High	0	1.304e-07
FALSE	High	[K].DNPEPDDDSTEQEMGTFK.[R]	2xTMT6plex [N-Term; K18]; 1xPhospho [S9(99.5)]	Q5W645 1xPhospho [S30(99.5)]	3.48096e-06	0	1	1	6	Q5W645	Q5W645 [22-39]	0	2593.11	High	High	High	High	High	High	High	High	High	S9(Phospho): 99.5	1	1.11955	1.00804	1.16591	1.13298	1.04864	1.43186	1.3331	1.50676	3	3	3	3	3	3	3	3	3	Unique	3.85659	High	0	2.283e-07
FALSE	High	[R].DDDPSGSGDDDEDDDGVEDLRPFK.[H]	2xTMT6plex [N-Term; K24]; 1xPhospho [S7(100)]		6.06538e-10	0	1	1	4	Q6YSF3	Q6YSF3 [451-474]	0	3148.32	High	High	High	High	High	High	High	High	High	S7(Phospho): 100	1	0.974405	1.01757	1.21478	0.96409	1.06721	1.51331	1.43971	1.72873	2	2	2	2	2	2	2	2	2	Unique	6.06386	High	0	9.496e-12
FALSE	High	[R].VEDMDQYSGDEYSD.[-]	1xTMT6plex [N-Term]; 2xPhospho [S8(100); S13(100)]	Q6ZD92 2xPhospho [S445(100); S450(100)]	0.00010293	0	1	1	3	Q6ZD92	Q6ZD92 [438-451]	0	2041.69	High	High	High	High	High	High	High	High	High	S8(Phospho): 100; S13(Phospho): 100	1	1.23323	1.19686	1.29687	1.31394	1.41219	1.65914	1.63084	1.65996	3	3	3	3	3	3	3	3	3	Unique	3.59763	High	0	1.18e-05
FALSE	High	[R].DDDPSGSGDDDEDDDGVEDLRPFK.[H]	2xTMT6plex [N-Term; K24]; 2xPhospho [S5(100); S7(100)]	Q6YSF3 2xPhospho [S455(100); S457(100)]	1.79315e-07	0	1	1	3	Q6YSF3	Q6YSF3 [451-474]	0	3228.28	High	High	High	High	High	High	High	High	High	S5(Phospho): 100; S7(Phospho): 100	1	1.16827	1.04046	1.25583	1.1752	1.12585	1.75669	1.60779	1.81559	3	3	3	3	3	3	3	3	3	Unique	5.11671	High	0	7.199e-09
FALSE	High	[R].VEDMDQYSGDEYSD.[-]	1xTMT6plex [N-Term]; 1xPhospho [S13(100)]	Q6ZD92 1xPhospho [S445(100)]	8.95235e-06	0	1	1	16	Q6ZD92	Q6ZD92 [438-451]	0	1961.72	High	High	High	High	High	High	High	High	High	S13(Phospho): 100	1	1.03734	0.991823	1.08675	1.0415	0.998797	1.46501	1.34366	1.51279	12	12	12	12	12	12	12	12	12	Unique	3.78309	High	0	2.129e-06
FALSE	High	[K].LSTQLAGVATQDSDEVEPK.[A]	2xTMT6plex [N-Term; K19]; 1xPhospho [T/S]		2.97468e-10	0	1	2	18	A0A0P0WKD6	A0A0P0WKD6 [417-435]	0	2526.27	High	High	High	High	High	High	High	High	High	T10(Phospho): 100	1	1.20786	1.34945	1.58908	1.36018	1.50504	1.03696	1.05553	1.03748	15	15	15	15	15	15	15	15	15	Unique	6.36885	High	0	4.131e-12
FALSE	High	[R].ESIDILSPNDENTASQK.[T]	2xTMT6plex [N-Term; K17]; 1xPhospho [S7(100)]	Q5JJU6 1xPhospho [S745(100)]	0.000135367	0	1	1	3	Q5JJU6	Q5JJU6 [739-755]	0	2399.17	High	High	High	High	High	High	High	High	High	S7(Phospho): 100	1	0.95715	0.964166	0.877612	0.855517	1.06037	0.981092	0.916266	1.10624	3	3	3	3	3	3	3	3	3	Unique	3.15105	High	0	4.419e-05
FALSE	High	[R-].MPSAVGYQPTLSTEMGSLQER.[I]	1xTMT6plex [N-Term]; 1xPhospho [S3(100)]	P12085 1xPhospho [S294(100)]	4.50407e-12	0	1	4	7	P12085	P12085 [292-312]	0	2591.21	High	High	High	High	High	High	High	High	High	S3(Phospho): 100	1	1.2647	0.884057	1.06037	1.03346	0.938204	1.10515	1.00078	1.03989	6	6	6	6	6	6	6	6	6	Unique	7.26458	High	0	3.123e-14
FALSE	High	[R].ALEDGSDSDASAELDEK.[L]	2xTMT6plex [N-Term; K17]; 1xPhospho [S6(100)]	Q94DI0 1xPhospho [S152(100)]	7.60139e-06	0	1	1	4	Q94DI0	Q94DI0 [147-163]	0	2290.04	High	High	High	High	High	High	High	High	High	S6(Phospho): 100	1	1.11448	0.86403	0.865884	0.860544	0.867839	1.11462	1.14773	1.38612	2	2	2	2	2	2	2	2	2	Unique	3.98536	High	0	7.249e-07
FALSE	High	[K].NFLDSQAEYDESSGEDQDAK.[V]	2xTMT6plex [N-Term; K20]; 2xPhospho [S12(100); S13(100)]	A0A0P0VA26 2xPhospho [S61(100); S62(100)]	4.65119e-09	0	1	1	1	A0A0P0VA26	A0A0P0VA26 [50-69]	0	2866.17	High	High	High	High	High	High	High	High	High	S12(Phospho): 100; S13(Phospho): 100	1	1.32154	1.01471	1.02909	0.771071	0.964591	0.940371	0.934514	0.905983	1	1	1	1	1	1	1	1	1	Unique	4.94788	High	0	1.019e-10
FALSE	High	[R].GGAAGDLDVFGAQASPGSTSR.[L]	1xTMT6plex [N-Term]; 2xPhospho [S15(100); S/T]	Q10QF7 2xPhospho [S102(100); S/T]	9.11054e-07	0	1	1	2	Q10QF7	Q10QF7 [88-108]	0	2310	High	High	High	High	High	High	High	High	High	S15(Phospho): 100; S18(Phospho): 49.75; T19(Phospho): 49.75	1	1.29718	0.866891	1.04766	1.0978	0.946023	1.21121	1.19287	1.18827	2	2	2	2	2	2	2	2	2	Unique	4.6597	High	0	4.77e-08
FALSE	High	[R].GGAAGDLDVFGAQASPGSTSR.[L]	1xTMT6plex [N-Term]; 1xPhospho [S15(100)]	Q10QF7 1xPhospho [S102(100)]	7.24243e-12	0	1	1	5	Q10QF7	Q10QF7 [88-108]	0	2230.03	High	High	High	High	High	High	High	High	High	S15(Phospho): 100	1	0.943955	0.897409	0.890317	0.88065	0.854157	0.916696	0.966209	1.01938	5	5	5	5	5	5	5	5	5	Unique	6.62114	High	0	5.441e-14
FALSE	High	[R-].MPSAVGYQPTLSTEMGSLQER.[I]	1xTMT6plex [N-Term]; 1xOxidation [M15(100)]; 1xPhospho [S3(100)]	P12085 1xPhospho [S294(100)]	1.16885e-10	0	1	4	4	P12085	P12085 [292-312]	0	2607.2	High	High	High	High	High	High	High	High	High	M1(Oxidation): 100; S3(Phospho): 100	1	1.12463	0.913621	1.05743	0.990228	0.998797	1.19701	1.14581	1.34751	4	4	4	4	4	4	4	4	4	Unique	6.21169	High	0	1.395e-12
FALSE	High	[R].SPTGGSTSALLQQYEQQR.[A]	1xTMT6plex [N-Term]; 2xPhospho [S1(100); T/S/Y]	Q6YPF2 2xPhospho [S35(100); T37(100)]	1.14498e-07	0	1	1	1	Q6YPF2	Q6YPF2 [35-52]	0	2340.05	High	High	High	High	High	High	High	High	High	S1(Phospho): 100; T3(Phospho): 100	1	1.2312	1.05763	0.964591	0.842448	1.04473	1.19417	1.19576	1.31856	1	1	1	1	1	1	1	1	1	Unique	5.02978	High	0	4.25e-09
FALSE	High	[R].SPTGGSTSALLQQYEQQR.[A]	1xTMT6plex [N-Term]; 1xPhospho [S1(100)]	Q6YPF2 1xPhospho [S35(100)]	1.18504e-12	0	1	1	26	Q6YPF2	Q6YPF2 [35-52]	0	2260.08	High	High	High	High	High	High	High	High	High	S1(Phospho): 100	1	1.1297	0.933649	1.19523	0.97917	1.00173	1.10704	1.11988	1.12554	22	22	22	22	22	22	22	22	22	Unique	7.5778	High	0	1.113e-12
FALSE	High	[K].GTGTANQCPTVEGGVDSFAFK.[A]	2xTMT6plex [N-Term; K21]; 1xCarbamidomethyl [C8]; 1xPhospho [T10(100)]	Q943W1 1xPhospho [S124(100)]	1.04122e-07	0	1	1	5	Q943W1	Q943W1 [108-128]	0	2681.27	High	High	High	High	High	High	High	High	High	S17(Phospho): 100	1	1.12564	1.07956	1.05841	1.12494	1.02616	1.1828	1.10547	1.22326	5	5	5	5	5	5	5	5	5	Unique	4.97308	High	0	1.442e-08
FALSE	High	[R].SASSSGSGQLFSPSGFR.[S]	1xTMT6plex [N-Term]; 1xPhospho [S3(98.9)]		0.00175772	0	1	1	7	Q8LI83	Q8LI83 [607-623]	0	1967.91	High	High	High	High	High	High	High	High	High	S3(Phospho): 98.91	1	1.04038	0.876428	1.02323	0.911814	0.844384	1.07106	1.11316	1.07608	3	3	3	3	3	3	3	3	3	Unique	3.0459	High	0	0.0003295
FALSE	High	[R].TVSLSDGIIQEGPQR.[I]	1xTMT6plex [N-Term]; 1xPhospho [S3(100)]	Q84M80 1xPhospho [S136(100)]	1.95114e-07	0	1	1	13	Q84M80	Q84M80 [134-148]	0	1908.96	High	High	High	High	High	High	High	High	High	S3(Phospho): 100	1	1.21801	1.02425	1.07405	0.982186	0.939182	1.00003	0.986378	0.98681	10	10	10	10	10	10	10	10	10	Unique	5.49135	High	0	7.939e-09
FALSE	High	[R].VTYIAPPQPPSPVPEESEEGSPSR.[V]	1xTMT6plex [N-Term]; 3xPhospho [S11(100); S17(100); S21(98.4)]	Q6ZD98 3xPhospho [S139(100); S145(100); S149(98.7)]	8.12491e-08	0	1	1	3	Q6ZD98	Q6ZD98 [129-152]	0	3019.3	High	High	High	High	High	High	High	High	High	S11(Phospho): 100; S17(Phospho): 99.98; S21(Phospho): 98.69	1	1.1297	1.1673	1.1063	0.988218	1.01541	1.47353	1.34462	1.33063	3	3	3	3	3	3	3	3	3	Unique	5.70248	High	0	2.852e-09
FALSE	High	[R].VTYIAPPQPPSPVPEESEEGSPSR.[V]	1xTMT6plex [N-Term]; 2xPhospho [S11(100); S21(97.9)]	Q6ZD98 2xPhospho [S139(100); S149(98.6)]	2.30162e-08	0	1	1	25	Q6ZD98	Q6ZD98 [129-152]	0	2939.33	High	High	High	High	High	High	High	High	High	S17(Phospho): 99.99; S21(Phospho): 99.2	1	1.10636	1.01853	1.05157	1.00631	0.979251	1.36179	1.36191	1.47298	24	24	24	24	24	24	24	24	24	Unique	5.95567	High	0	6.587e-10
FALSE	High	[R].VTYIAPPQPPSPVPEESEEGSPSR.[V]	1xTMT6plex [N-Term]; 1xPhospho [S/T/Y]	Q6ZD98 1xPhospho [S139(100)]	1.70369e-08	0	1	1	55	Q6ZD98	Q6ZD98 [129-152]	0	2859.37	High	High	High	High	High	High	High	High	High	S21(Phospho): 99.44	1	1.15203	1.04904	1.02127	0.995255	0.996842	1.35705	1.22745	1.49349	33	33	33	33	33	33	33	33	33	Unique	6.27529	High	0	2.02e-09
FALSE	High	[R].AAIMEADLAASPAK.[T]	2xTMT6plex [N-Term; K14]; 1xPhospho [S11(100)]	Q6EP35 1xPhospho [S313(100)]	2.29422e-06	0	1	2	2	Q6EP35	Q6EP35 [303-316]	0	1896.99	High	High	High	High	High	High	High	High	High	S11(Phospho): 100	1	0.93685	1.0109	0.942114	1.03949	1.07796	1.25193	1.26107	1.2872	2	2	2	2	2	2	2	2	2	Unique	4.33248	High	0	1.403e-07
FALSE	High	[R].TLDGDSGDEDGGSGYLVK.[F]	2xTMT6plex [N-Term; K18]; 1xPhospho [S6(100)]	Q7XZH4 1xPhospho [S223(100)]	4.17189e-07	0	1	1	6	Q7XZH4	Q7XZH4 [218-235]	0	2323.07	High	High	High	High	High	High	High	High	High	S6(Phospho): 100	1	1.1094	1.10912	1.1493	1.0606	1.04668	1.07674	1.06898	1.13761	6	6	6	6	6	6	6	6	6	Unique	4.98112	High	0	1.926e-08
FALSE	High	[K].IIDDDVAAVATSSSAK.[E]	2xTMT6plex [N-Term; K16]; 1xPhospho [S14(100)]	Q5NAI4 1xPhospho [S432(100)]	9.2368e-09	0	1	1	2	Q5NAI4	Q5NAI4 [419-434]	0	2101.08	High	High	High	High	High	High	High	High	High	S14(Phospho): 100	1	1.07591	1.00994	0.931363	1.03044	0.843407	1.08526	0.947	0.991636	2	2	2	2	2	2	2	2	2	Unique	5.21356	High	0	2.27e-10
FALSE	High	[K].YMLSQIAGGSGGK.[R]	2xTMT6plex [N-Term; K13]; 1xPhospho [S10(100)]	Q5TKG2 1xPhospho [S812(100)]	4.76027e-07	0	1	2	3	Q5TKG2	Q5TKG2 [803-815]	0	1806.92	High	High	High	High	High	High	High	High	High	S10(Phospho): 100	1	1.14899	0.95749	1.15223	1.43156	1.17178	1.0417	1.3696	0.909603	3	3	3	3	3	3	3	3	3	Unique	5.23174	High	0	2.237e-08
FALSE	High	[K].LFGDTAAASESDEPAK.[E]	2xTMT6plex [N-Term; K16]; 2xPhospho [S9(100); S11(100)]	Q6ZFM7 2xPhospho [S492(100); S494(100)]	2.10412e-08	0	1	1	11	Q6ZFM7	Q6ZFM7 [484-499]	0	2227	High	High	High	High	High	High	High	High	High	S9(Phospho): 100; S11(Phospho): 100	1	0.816064	0.8173	0.62156	0.688636	0.718313	1.71312	1.97372	1.79749	11	11	11	11	11	11	11	11	11	Unique	5.67025	High	0	5.927e-10
FALSE	High	[R].VSPNTSPPLLSSPK.[I]	2xTMT6plex [N-Term; K14]; 2xPhospho [S2(100); T/S]	Q0J0H3 2xPhospho [S486(100); T489(100)]	4.11287e-05	0	1	1	9	Q0J0H3	Q0J0H3 [485-498]	0	2042.04	High	High	High	High	High	High	High	High	High	S2(Phospho): 100; T5(Phospho): 100	1	0.93888	0.971796	0.971432	0.895729	0.808224	1.31349	1.25146	1.25824	9	9	9	9	9	9	9	9	9	Unique	4.2469	High	0	5.066e-06
FALSE	High	[K].LFGDTAAASESDEPAK.[E]	2xTMT6plex [N-Term; K16]; 1xPhospho [S9(100)]	Q6ZFM7 1xPhospho [S492(100)]	1.0211e-08	0	1	1	14	Q6ZFM7	Q6ZFM7 [484-499]	0	2147.03	High	High	High	High	High	High	High	High	High	S9(Phospho): 100	1	0.887115	0.894548	0.698767	0.745938	0.786723	2.11654	2.45394	2.26436	9	9	9	9	9	9	9	9	9	Unique	5.83415	High	0	2.552e-10
FALSE	High	[R].VSPNTSPPLLSSPK.[I]	2xTMT6plex [N-Term; K14]; 3xPhospho [S2(100); S12(100); T/S]	Q0J0H3 3xPhospho [S486(100); S496(98.9); T/S]	7.95043e-05	0	1	1	11	Q0J0H3	Q0J0H3 [485-498]	0	2122	High	High	High	High	High	High	High	High	High	S2(Phospho): 100; T5(Phospho): 99.99; S12(Phospho): 99.22	1	1.11854	1.14536	1.22651	1.05155	1.05255	1.19133	1.09395	1.16535	10	10	10	10	10	10	10	10	10	Unique	4.59816	High	0	8.733e-06
FALSE	High	[K].DMPSDGDDAEPTGITILR.[R]	1xTMT6plex [N-Term]; 1xPhospho [S4(100)]	Q7EZD3 1xPhospho [S513(100)]	9.41877e-08	0	1	1	8	Q7EZD3	Q7EZD3 [510-527]	0	2212	High	High	High	High	High	High	High	High	High	S4(Phospho): 100	1	1.17944	1.03188	1.22748	1.0978	1.06818	1.23962	1.20056	1.38371	8	8	8	8	8	8	8	8	8	Unique	5.79331	High	0	3.402e-09
FALSE	High	[K].LDVLEESMGSPK.[E]	2xTMT6plex [N-Term; K12]; 1xOxidation [M8(100)]; 1xPhospho [S10(100)]	Q6I5K0 1xPhospho [S789(100)]	0.000257192	0	1	1	4	Q6I5K0	Q6I5K0 [780-791]	0	1858.93	High	High	High	High	High	High	High	High	High	M8(Oxidation): 100; S10(Phospho): 100	1	1.03531	0.972749	0.828747	0.721811	0.854157	0.822943	0.786605	0.822744	4	4	4	4	4	4	4	4	4	Unique	3.73117	High	0	4.246e-05
FALSE	High	[K].LDVLEESMGSPK.[E]	2xTMT6plex [N-Term; K12]; 1xPhospho [S10(100)]	Q6I5K0 1xPhospho [S789(100)]	3.36584e-05	0	1	1	2	Q6I5K0	Q6I5K0 [780-791]	0	1842.93	High	High	High	High	High	High	High	High	High	S10(Phospho): 100	1	1.07388	1.17493	0.886408	0.794193	0.867839	0.835254	0.931633	1.01697	2	2	2	2	2	2	2	2	2	Unique	4.07826	High	0	3.211e-06
FALSE	High	[R].IISVTSEESE.[-]	1xTMT6plex [N-Term]; 1xPhospho [S9(100)]	Q6EUQ1 1xPhospho [S791(99.7)]	3.33052e-05	0	1	2	12	Q6EUQ1	Q6EUQ1 [786-795]	0	1402.66	High	High	High	High	High	High	High	High	High	S9(Phospho): 100	1	1.11549	0.976564	1.04375	0.975149	0.90009	1.08526	1.0248	1.02541	9	9	9	9	9	9	9	9	9	Unique	3.94393	High	0	3.169e-06
FALSE	High	[R].FLGTSEMDPDSEPDSAR.[S]	1xTMT6plex [N-Term]; 2xPhospho [S11(100); S15(100)]	Q5QLD9 2xPhospho [S685(100); S689(100)]	0.000492727	0	1	2	1	Q5QLD9	Q5QLD9 [675-691]	0	2242.88	High	High	High	High	High	High	High	High	High	S11(Phospho): 100; S15(Phospho): 100	1	0.93888	0.82493	0.894226	0.932926	0.753495	0.997191	1.10163	1.02059	1	1	1	1	1	1	1	1	1	Unique	3.44032	High	0	7.358e-05
FALSE	High	[R].FLGTSEMDPDSEPDSAR.[S]	1xTMT6plex [N-Term]; 1xPhospho [S15(100)]	Q5QLD9 1xPhospho [S689(99.1)]	1.94448e-05	0	1	2	2	Q5QLD9	Q5QLD9 [675-691]	0	2162.92	High	High	High	High	High	High	High	High	High	S15(Phospho): 100	1	1.13681	0.995637	1.01346	0.93192	0.880544	1.03223	0.948921	1.12313	2	2	2	2	2	2	2	2	2	Unique	4.07768	High	0	1.692e-06
FALSE	High	[R].QLSLDQFENESR.[R]	1xTMT6plex [N-Term]; 1xPhospho [S3(100)]	Q60EX6 1xPhospho [S493(100)]	6.1225e-06	0	1	1	7	Q60EX6	Q60EX6 [491-502]	0	1774.82	High	High	High	High	High	High	High	High	High	S3(Phospho): 100	1	1.11245	0.914575	0.980228	0.859538	0.861975	0.858929	0.911463	0.914428	7	7	7	7	7	7	7	7	7	Unique	4.21604	High	0	4.405e-07
FALSE	High	[R].FAQLATTSDDDDDDAPAADAPPK.[A]	2xTMT6plex [N-Term; K23]; 1xPhospho [T/S]		6.56813e-07	0	1	1	7	Q5QLH2	Q5QLH2 [7-29]	0	2885.31	High	High	High	High	High	High	High	High	High	S8(Phospho): 98.18	1	1.12057	1.01185	1.11998	1.00531	1.02518	1.41482	1.22073	1.25101	4	4	4	4	4	4	4	4	4	Unique	4.08854	High	0	3.264e-08
FALSE	High	[K].DEDDDSTEEWANFR.[G]	1xTMT6plex [N-Term]; 1xPhospho [S6(100)]	Q5Z754 1xPhospho [S443(100)]	3.03958e-07	0	1	2	19	Q5Z754	Q5Z754 [438-451]	0	2037.79	High	High	High	High	High	High	High	High	High	S6(Phospho): 100	1	1.03328	0.942232	0.956773	0.859538	0.909863	1.18849	1.18711	1.31615	12	12	12	12	12	12	12	12	12	Unique	4.65828	High	0	1.333e-08
FALSE	High	[R].GIDALASDLDKTSPVGR.[S]	2xTMT6plex [N-Term; K11]; 1xPhospho [T12(99.5)]	Q7XIJ5 1xPhospho [T363(99.5)]	4.59458e-05	0	1	2	5	Q7XIJ5	Q7XIJ5 [352-368]	1	2253.19	High	High	High	High	High	High	High	High	High	T12(Phospho): 99.5	1	1.06576	0.977518	0.823861	0.918851	0.85318	1.09379	1.13045	1.099	3	3	3	3	3	3	3	3	3	Unique	3.48092	High	0	4.624e-06
FALSE	High	[R].EDCWSEGETEALVR.[A]	1xTMT6plex [N-Term]; 1xCarbamidomethyl [C3]; 1xPhospho [S5(100)]	Q688Y5 1xPhospho [S42(100)]	4.54637e-05	0	1	1	5	Q688Y5	Q688Y5 [38-51]	0	1989.85	High	High	High	High	High	High	High	High	High	S5(Phospho): 100	1	0.974405	0.945093	1.02812	0.899751	1.03202	1.24909	1.19672	1.40904	5	5	5	5	5	5	5	5	5	Unique	3.87489	High	0	4.555e-06
FALSE	High	[K].WTLDGEESDEEGNQEDGK.[K]	2xTMT6plex [N-Term; K18]; 1xPhospho [S8(100)]	Q84UQ1 1xPhospho [S233(100)]	3.61195e-06	0	1	1	4	Q84UQ1	Q84UQ1 [226-243]	0	2576.11	High	High	High	High	High	High	High	High	High	S8(Phospho): 100	1	1.06677	0.896455	1.08187	0.987212	0.932341	1.0739	1.21112	1.29323	4	4	4	4	4	4	4	4	4	Unique	4.12795	High	0	2.386e-07
FALSE	High	[K].NNAGFPHNVVFDEDAVPSGVDVSK.[I]	2xTMT6plex [N-Term; K24]; 1xPhospho [S]	Q0DFC9 1xPhospho [S110(98.8)]	5.24208e-05	0	1	1	3	Q0DFC9	Q0DFC9 [88-111]	0	3052.48	High	High	High	High	High	High	High	High	High	S23(Phospho): 98.81	1	0.99166	0.949861	1.14441	1.01938	1.03202	1.21784	1.09683	1.33907	2	2	2	2	2	2	2	2	2	Unique	3.95595	High	0	5.382e-06
FALSE	High	[K].FDWDHPMHLQPTSPTAFK.[Q]	2xTMT6plex [N-Term; K18]; 1xOxidation [M7(100)]; 1xPhospho [S13(97.8)]		3.93659e-07	0	1	2	4	Q2QS14	Q2QS14 [381-398]	0	2709.29	High	High	High	High	High	High	High	High	High	M7(Oxidation): 100; S13(Phospho): 99.99	1	1.20684	1.34468	0.799428	0.763029	0.740791	0.816314	0.795249	0.834808	4	4	4	4	4	4	4	4	4	Unique	5.31608	High	0	1.796e-08
FALSE	High	[K].FDWDHPMHLQPTSPTAFK.[Q]	2xTMT6plex [N-Term; K18]; 1xPhospho [S13(100)]	Q2QS14 1xPhospho [S393(100)]	5.14397e-06	0	1	2	5	Q2QS14	Q2QS14 [381-398]	0	2693.3	High	High	High	High	High	High	High	High	High	S13(Phospho): 100	1	1.32966	1.19496	0.925499	0.770066	0.7447	0.841883	0.795249	0.872205	4	4	4	4	4	4	4	4	4	Unique	4.28066	High	0	3.592e-07
FALSE	High	[K].SQSFAAVTTPGGEAAAVAGEK.[K]	2xTMT6plex [N-Term; K21]; 2xPhospho [S3(99); T8(99)]	Q0IZR7 2xPhospho [S104(99); T109(99)]	1.15939e-05	0	1	1	1	Q0IZR7	Q0IZR7 [102-122]	0	2567.22	High	High	High	High	High	High	High	High	High	S3(Phospho): 98.96; T8(Phospho): 98.96	1	1.15	1.1015	1.16689	1.25563	1.26364	1.48016	1.13813	1.62981	1	1	1	1	1	1	1	1	1	Unique	4.545	High	0	9.26e-07
FALSE	High	[R].GGDSDSDFDEFGSMDVTK.[T]	2xTMT6plex [N-Term; K18]; 1xOxidation [M14(100)]; 1xPhospho [S6(100)]	Q5Z754 1xPhospho [S457(100)]	6.45427e-06	0	1	2	4	Q5Z754	Q5Z754 [452-469]	0	2463.03	High	High	High	High	High	High	High	High	High	S4(Phospho): 99.99; M14(Oxidation): 100	1	1.06576	0.899316	1.10532	1.06965	0.982183	1.1042	1.11028	1.25101	3	3	3	3	3	3	3	3	3	Unique	4.23758	High	0	4.683e-07
FALSE	High	[R].GGDSDSDFDEFGSMDVTK.[T]	2xTMT6plex [N-Term; K18]; 1xPhospho [S6(99.5)]	Q5Z754 1xPhospho [S457(100)]	7.08316e-08	0	1	2	8	Q5Z754	Q5Z754 [452-469]	0	2447.04	High	High	High	High	High	High	High	High	High	S6(Phospho): 100	1	1.07895	0.901224	1.03691	0.898745	0.970455	1.11651	1.1727	1.28358	5	5	5	5	5	5	5	5	5	Unique	5.18693	High	0	2.433e-09
FALSE	High	[K].ATNTGSCASFSDVDEDIPEK.[A]	2xTMT6plex [N-Term; K20]; 1xCarbamidomethyl [C7]; 1xPhospho [S11(100)]		2.39207e-09	0	1	1	15	Q0IT61	Q0IT61 [507-526]	0	2681.21	High	High	High	High	High	High	High	High	High	S11(Phospho): 99.49	1	1.05155	1.08624	1.11509	1.10584	1.04668	1.13829	1.16022	1.33183	12	12	12	12	12	12	12	12	12	Unique	5.82438	High	0	4.683e-11
FALSE	High	[R].SLQSIYEQESGSLSR.[R]	1xTMT6plex [N-Term]; 1xPhospho [S14(99.5)]		6.45427e-06	0	1	2	3	Q8H3P9	Q8H3P9 [707-721]	0	1992.95	High	High	High	High	High	High	High	High	High	S14(Phospho): 99.47	1	1.07388	0.979425	1.05353	1.00531	0.969478	1.07485	1.13525	1.08815	3	3	3	3	3	3	3	3	3	Unique	4.47801	High	0	2.879e-06
FALSE	High	[R].QLSIDQFENEGR.[R]	1xTMT6plex [N-Term]; 1xPhospho [S3(100)]	Q2QM47 1xPhospho [S618(100)]	3.21603e-06	0	1	2	4	Q2QM47	Q2QM47 [616-627]	0	1744.81	High	High	High	High	High	High	High	High	High	S3(Phospho): 100	1	1.05764	0.780107	0.88934	0.846469	0.772064	0.794533	0.886492	0.804648	4	4	4	4	4	4	4	4	4	Unique	4.39424	High	0	2.082e-07
FALSE	High	[K].VAITESNSSLTNPEGSEFSPK.[L]	2xTMT6plex [N-Term; K21]; 1xPhospho [S19(100)]	Q9ARU4 1xPhospho [S361(99.3)]	1.90642e-09	0	1	1	13	Q9ARU4	Q9ARU4 [343-363]	0	2732.34	High	High	High	High	High	High	High	High	High	S19(Phospho): 100	1	0.93482	0.905992	1.00368	0.971127	0.944068	1.11272	1.13333	1.13881	8	8	8	8	8	8	8	8	8	Unique	5.83024	High	0	8.106e-10
FALSE	High	[K].VAITESNSSLTNPEGSEFSPK.[L]	2xTMT6plex [N-Term; K21]; 2xPhospho [S8(100); S19(100)]	Q9ARU4 2xPhospho [S350(100); S361(100)]	0.000223167	0	1	1	2	Q9ARU4	Q9ARU4 [343-363]	0	2812.31	High	High	High	High	High	High	High	High	High	S8(Phospho): 100; S19(Phospho): 100	1	0.94294	0.808717	0.710494	0.676572	0.768155	0.992456	0.952763	1.01094	1	1	1	1	1	1	1	1	1	Unique	3.25681	High	0	0.0001772
FALSE	High	[K].EEEKKEEPEEESDGDLGMSLFD.[-]	3xTMT6plex [N-Term; K4; K5]; 1xOxidation [M18(100)]; 1xPhospho [S12(100)]	Q2QY46 1xPhospho [S310(100)]	2.38442e-07	0	1	4	5	Q2QY46	Q2QY46 [299-320]	2	3325.52	High	High	High	High	High	High	High	High	High	S12(Phospho): 100; M18(Oxidation): 100	1	1.03632	1.05095	1.19719	1.27473	1.16689	1.26519	1.19672	1.18224	5	5	5	5	5	5	5	5	5	Unique	6.01823	High	0	2.977e-08
FALSE	High	[K].EEEKKEEPEEESDGDLGMSLFD.[-]	3xTMT6plex [N-Term; K4; K5]; 1xPhospho [S12(100)]	Q2QY46 1xPhospho [S310(100)]	8.39974e-09	0	1	4	8	Q2QY46	Q2QY46 [299-320]	2	3309.52	High	High	High	High	High	High	High	High	High	S12(Phospho): 100	1	1.03125	1.0519	1.16298	1.14907	1.08969	1.19511	1.1266	1.06281	8	8	8	8	8	8	8	8	8	Unique	5.72979	High	0	2.03e-10
FALSE	High	[K].DMPSDGDDAEPTGITILR.[R]	1xTMT6plex [N-Term]; 1xOxidation [M2(100)]; 1xPhospho [S4(100)]	Q7EZD3 1xPhospho [S513(100)]	5.58451e-05	0	1	1	3	Q7EZD3	Q7EZD3 [510-527]	0	2228	High	High	High	High	High	High	High	High	High	M2(Oxidation): 100; S4(Phospho): 100	1	1.29616	1.25218	1.22748	1.13298	1.02812	1.16386	1.24474	1.24859	3	3	3	3	3	3	3	3	3	Unique	4.12208	High	0	5.781e-06
FALSE	High	[R].SSTMPGGINNVEITNETAGPSNLER.[S]	1xTMT6plex [N-Term]; 1xPhospho [S1(98.5)]	Q7XRN9 1xPhospho [S53(98.5)]	2.34697e-07	0	1	1	6	Q7XRN9	Q7XRN9 [53-77]	0	2897.35	High	High	High	High	High	High	High	High	High	S1(Phospho): 98.51	1	1.10839	0.894548	0.798451	1.02944	0.879567	1.40345	1.52999	1.46333	2	2	2	2	2	2	2	2	2	Unique	3.90094	High	0	9.851e-09
FALSE	High	[R].AVEAALQAAGEGSSSPAR.[S]	1xTMT6plex [N-Term]; 1xPhospho [S15(99.5)]	Q6YSF3 1xPhospho [S22(100)]	5.49548e-11	0	1	1	14	Q6YSF3	Q6YSF3 [8-25]	0	1980.96	High	High	High	High	High	High	High	High	High	S15(Phospho): 99.51	1	1.09012	0.942232	1.04473	0.983191	0.973387	1.1203	1.15638	1.20999	6	6	6	6	6	6	6	6	6	Unique	6.02358	High	0	3.035e-12
FALSE	High	[R].TSLGGDDDLLAQQK.[Q]	2xTMT6plex [N-Term; K14]; 1xPhospho [S2(99.6)]	Q0DUS0 1xPhospho [S54(99.5)]	4.42833e-08	0	1	1	16	Q0DUS0	Q0DUS0 [53-66]	0	1999.01	High	High	High	High	High	High	High	High	High	S2(Phospho): 99.74	1	0.93482	1.0891	1.24214	1.1933	1.2011	1.2311	1.28124	1.22326	9	9	9	9	9	9	9	9	9	Unique	5.12529	High	0	1.411e-09
FALSE	High	[K].MAFGSGNLESSQQTQPTEFVPNR.[S]	1xTMT6plex [N-Term]; 1xPhospho [S5(100)]	Q8W0B8 1xPhospho [S544(100)]	4.57041e-05	0	1	1	2	Q8W0B8	Q8W0B8 [540-562]	0	2834.3	High	High	High	High	High	High	High	High	High	S5(Phospho): 100	1	1.08098	0.935556	1.05353	0.983191	1.02812	1.14114	1.20248	1.30409	2	2	2	2	2	2	2	2	2	Unique	3.84814	High	0	4.594e-06
FALSE	High	[R].LSSEFSADEINK.[L]	2xTMT6plex [N-Term; K12]; 1xPhospho [S2(100)]	Q84QV5 1xPhospho [S232(100)]	5.58451e-05	0	1	1	7	Q84QV5	Q84QV5 [231-242]	0	1877.93	High	High	High	High	High	High	High	High	High	S2(Phospho): 99.6	1	1.07997	0.869752	0.843407	0.671546	0.818974	0.646801	0.724176	0.781727	4	4	4	4	4	4	4	4	4	Unique	4.23496	High	0	5.799e-06
FALSE	High	[K].EAHNDEDDGTGSDGFELIDVK.[E]	2xTMT6plex [N-Term; K21]; 1xPhospho [S12(100)]		2.73251e-13	0	1	1	14	A0A0P0WEZ7	A0A0P0WEZ7 [28-48]	0	2801.26	High	High	High	High	High	High	High	High	High	S12(Phospho): 100	1	1.18654	0.973703	1.04082	0.893719	0.857089	1.14398	1.14869	1.14967	8	8	8	8	8	8	8	8	8	Unique	7.28641	High	0	1.194e-15
FALSE	High	[K].VAGISPPSSPIR.[V]	1xTMT6plex [N-Term]; 2xPhospho [S5(100); S9(99.2)]	Q10K55 2xPhospho [S360(100); S364(99.4)]	0.000842891	0	1	2	18	Q10K55	Q10K55 [356-367]	0	1569.76	High	High	High	High	High	High	High	High	High	S5(Phospho): 100; S9(Phospho): 100	1	1.05865	0.933649	1.01737	0.978165	0.947	1.07011	1.13813	1.18586	18	18	18	18	18	18	18	18	18	Unique	3.6143	High	0	0.0001385
FALSE	High	[R].GGSESGGGSAEDGSWWAER.[L]	1xTMT6plex [N-Term]; 1xPhospho [S]		0.000119922	0	1	1	4	Q7XUF9	Q7XUF9 [263-281]	0	2190.89	High	High	High	High	High	High	High	High	High	S3(Phospho): 99.99	1	1.09418	0.850679	0.996842	1.08774	0.929409	1.2311	1.33118	1.42352	3	3	3	3	3	3	3	3	3	Unique	3.35319	High	0	1.415e-05
FALSE	High	[R].DVFGESDEDEPAPYR.[D]	1xTMT6plex [N-Term]; 1xPhospho [S6(100)]	Q2QN51 1xPhospho [S215(100)]	7.73558e-07	0	1	1	2	Q2QN51	Q2QN51 [210-224]	0	2034.85	High	High	High	High	High	High	High	High	High	S6(Phospho): 100	1	0.701369	0.756265	0.674334	0.768055	0.543377	0.740554	0.789487	0.85411	2	2	2	2	2	2	2	2	2	Unique	4.48529	High	0	3.957e-08
FALSE	High	[R].AASDDTSTSASGDELVADLK.[A]	2xTMT6plex [N-Term; K20]; 1xPhospho [T6(99)]		9.94882e-06	0	1	1	20	Q5Z6P4	Q5Z6P4 [54-73]	0	2491.19	High	High	High	High	High	High	High	High	High	T6(Phospho): 99.35	1	1.09824	0.960351	1.17373	1.14706	1.04473	1.03981	1.05553	1.03265	9	9	9	9	9	9	9	9	9	Unique	4.32801	High	0	2.046e-06
FALSE	High	[R].DVFGESDEDGPAPYR.[D]	1xTMT6plex [N-Term]; 1xPhospho [S6(100)]	Q0D934 1xPhospho [S219(100)]	2.06068e-05	0	1	1	5	Q0D934	Q0D934 [214-228]	0	1962.83	High	High	High	High	High	High	High	High	High	S6(Phospho): 100	1	1.07185	1.19114	1.20403	1.35817	1.2871	1.4527	1.57225	1.58758	5	5	5	5	5	5	5	5	5	Unique	3.77148	High	0	1.811e-06
FALSE	High	[K].DNVALPSDSFK.[K]	2xTMT6plex [N-Term; K11]; 1xPhospho [S9(100)]	Q0DKG9 1xPhospho [S284(100)]	0.000265427	0	1	2	5	Q0DKG9	Q0DKG9 [276-286]	0	1730.88	High	High	High	High	High	High	High	High	High	S9(Phospho): 100	1	1.00486	0.844003	1.02812	1.03446	0.945045	0.834307	0.947	0.904777	5	5	5	5	5	5	5	5	5	Unique	3.80429	High	0	3.563e-05
FALSE	High	[K].VQLLEADSDSSATGLGSTDPSSSSTPR.[K]	1xTMT6plex [N-Term]; 1xPhospho [S/T]		1.41635e-08	0	1	1	20	A0A0N7KLL5	A0A0N7KLL5 [254-280]	0	2974.37	High	High	High	High	High	High	High	High	High	T25(Phospho): 98.66	1	1.0688	0.851632	1.06428	1.03547	1.09262	1.37883	1.06802	1.26307	2	2	2	2	2	2	2	2	2	Unique	4.7632	High	0	3.741e-10
FALSE	High	[K].YEGSDTLSLPETVHER.[-]	1xTMT6plex [N-Term]; 2xPhospho [S4(99.4); S8(99.4)]	Q5TKG1 2xPhospho [S754(99.1); S758(99.1)]	1.84109e-07	0	1	1	6	Q5TKG1	Q5TKG1 [751-766]	0	2221.96	High	High	High	High	High	High	High	High	High	S4(Phospho): 99.34; S8(Phospho): 100	1	1.02922	1.05	1.12878	1.21039	1.05939	1.20742	1.30429	1.18586	6	6	6	6	6	6	6	6	6	Unique	5.37614	High	0	7.392e-09
FALSE	High	[K].WVSDTGVENIGK.[R]	2xTMT6plex [N-Term; K12]; 1xPhospho [S3(99.5)]	A0A0P0Y677 1xPhospho [S301(99.5)]; P93431 1xPhospho [S353(99.5)]	0.00146307	0	2	2	1	A0A0P0Y677; P93431	A0A0P0Y677 [299-310]; P93431 [351-362]	0	1842.94	High	High	High	High	High	High	High	High	High	S3(Phospho): 99.54	1	0.92264	1.08624	1.01932	1.25261	0.902044	1.0417	0.843272	1.15811	1	1	1	1	1	1	1	1	1	Not Unique	3.30905	High	0	0.0002653
FALSE	High	[R].SKPTTLETIQSFTQR.[G]	2xTMT6plex [N-Term; K2]; 1xPhospho [S11(100)]	Q10RZ6 1xPhospho [S109(99.4)]	4.71785e-08	0	1	1	3	Q10RZ6	Q10RZ6 [99-113]	0	2275.21	High	High	High	High	High	High	High	High	High	S11(Phospho): 100	1	1.20684	0.84591	1.08675	1.06362	1.05353	1.16197	1.19191	1.19672	3	3	3	3	3	3	3	3	3	Unique	5.63098	High	0	1.52e-09
FALSE	High	[R].DSAAQPTSSYGSFTTYEK.[I]	2xTMT6plex [N-Term; K18]; 2xPhospho [S12(98.4); S/Y/T]	Q84R70 2xPhospho [S733(98.4); S/Y/T]	0.00142613	0	1	1	2	Q84R70	Q84R70 [722-739]	0	2558.11	High	High	High	High	High	High	High	High	High	S8(Phospho): 49.73; S9(Phospho): 49.73; S12(Phospho): 98.38	1	1.14594	0.897409	1.17569	1.08473	1.02323	1.17333	1.05553	1.3077	1	1	1	1	1	1	1	1	1	Unique	2.97324	High	0	0.0002574
FALSE	High	[R].TVLSDEEDEIEEEEEEENPRPSR.[R]	1xTMT6plex [N-Term]; 1xPhospho [S4(100)]	A0A0P0WP66 1xPhospho [S8(100)]	1.70369e-08	0	1	1	2	A0A0P0WP66	A0A0P0WP66 [5-27]	0	3069.33	High	High	High	High	High	High	High	High	High	S4(Phospho): 99.99	1	1.11143	1.12438	1.14441	1.25462	1.15028	1.48584	1.4109	1.59361	2	2	2	2	2	2	2	2	2	Unique	5.77074	High	0	4.957e-09
FALSE	High	[K].FNGGLDSSVPTSPSR.[H]	1xTMT6plex [N-Term]; 2xPhospho [S12(99.2); S/T]	Q10QF7 2xPhospho [S128(99.2); S/T]	4.66785e-05	0	1	1	4	Q10QF7	Q10QF7 [117-131]	0	1909.83	High	High	High	High	High	High	High	High	High	S8(Phospho): 99.3; S12(Phospho): 98.61	1	1.05865	1.08528	0.929409	1.10081	0.986092	0.981092	0.978695	1.07608	4	4	4	4	4	4	4	4	4	Unique	3.56272	High	0	4.699e-06
FALSE	High	[R].LDYTTDDDFSSAASPPHSDVAQVGR.[L]	1xTMT6plex [N-Term]; 3xPhospho [S10(98.4); S14(100); T/S/Y]	Q8H069 3xPhospho [T371(97.4); S381(100); T/S/Y]	1.51207e-06	0	1	1	2	Q8H069	Q8H069 [368-392]	0	3120.25	High	High	High	High	High	High	High	High	High	T4(Phospho): 50.01; T5(Phospho): 50.01; S10(Phospho): 98.45; S14(Phospho): 99.97	1	1.15711	1.07765	1.04864	1.1561	0.945045	1.39872	1.40609	1.41628	2	2	2	2	2	2	2	2	2	Unique	3.77262	High	0	8.645e-08
FALSE	High	[R].LDYTTDDDFSSAASPPHSDVAQVGR.[L]	1xTMT6plex [N-Term]; 2xPhospho [S14(99); S/T/Y]	Q8H069 2xPhospho [T372(99.3); S381(100)]	1.52986e-10	0	1	1	5	Q8H069	Q8H069 [368-392]	0	3040.28	High	High	High	High	High	High	High	High	High	T5(Phospho): 99.25; S14(Phospho): 100	1	1.03734	1.02329	0.923545	1.12695	1.05059	1.27561	1.29084	1.31977	4	4	4	4	4	4	4	4	4	Unique	6.23817	High	0	1.901e-12
FALSE	High	[R].LDYTTDDDFSSAASPPHSDVAQVGR.[L]	1xTMT6plex [N-Term]; 1xPhospho [S14(100)]	Q8H069 1xPhospho [S381(100)]	2.80425e-16	0	1	1	14	Q8H069	Q8H069 [368-392]	0	2960.31	High	High	High	High	High	High	High	High	High	S14(Phospho): 100	1	0.988615	0.991823	1.13366	1.1752	1.12878	1.28887	1.22073	1.31856	10	10	10	10	10	10	10	10	10	Unique	9.14294	High	0	3.924e-19
FALSE	High	[K].EESDNETLSVWK.[K]	2xTMT6plex [N-Term; K12]; 1xPhospho [S3(100)]	Q5VMT5 1xPhospho [S1545(100)]	4.34469e-06	0	1	2	7	Q5VMT5	Q5VMT5 [1543-1554]	0	1974.95	High	High	High	High	High	High	High	High	High	S3(Phospho): 100	1	1.08606	0.862123	1.05841	0.796204	0.913772	0.979198	1.117	1.21843	7	7	7	7	7	7	7	7	7	Unique	4.93414	High	0	2.956e-07
FALSE	High	[R].SESINDSDLPMLER.[E]	1xTMT6plex [N-Term]; 1xPhospho [S3(100)]	Q6KA01 1xPhospho [S346(100)]	3.13228e-06	0	1	4	5	Q6KA01	Q6KA01 [344-357]	0	1914.87	High	High	High	High	High	High	High	High	High	S3(Phospho): 99.6	1	1.14899	1.06621	1.14539	0.917846	0.906931	0.992456	0.957565	1.00611	5	5	5	5	5	5	5	5	5	Unique	4.71889	High	0	2.013e-07
FALSE	High	[K].KLADDDGEDSLDENDLT.[-]	2xTMT6plex [N-Term; K1]; 1xPhospho [S10(100)]	Q7X6D9 1xPhospho [S291(100)]	2.6541e-08	0	1	1	14	Q7X6D9	Q7X6D9 [282-298]	1	2403.09	High	High	High	High	High	High	High	High	High	S10(Phospho): 100	1	1.21699	1.07479	1.09946	1.00933	1.0418	1.23962	1.16598	1.26669	11	11	11	11	11	11	11	11	11	Unique	5.69606	High	0	7.776e-10
FALSE	High	[K].EVILVDDNDSEQEDGGSGK.[V]	2xTMT6plex [N-Term; K19]; 1xPhospho [S10(100)]	Q6K1Y4 1xPhospho [S65(100)]	1.0994e-08	0	1	2	10	Q6K1Y4	Q6K1Y4 [56-74]	0	2544.18	High	High	High	High	High	High	High	High	High	S10(Phospho): 100	1	1.06373	1.07861	1.13464	1.15208	1.08089	1.20742	1.27355	1.28478	10	10	10	10	10	10	10	10	10	Unique	5.47007	High	0	2.78e-10
FALSE	High	[K].SVDTLTTLQK.[Q]	2xTMT6plex [N-Term; K10]; 1xPhospho [S1(100)]	Q0DKG9 1xPhospho [S298(100)]	2.09356e-05	0	1	2	11	Q0DKG9	Q0DKG9 [298-307]	0	1643.9	High	High	High	High	High	High	High	High	High	S1(Phospho): 100	1	1.08504	0.99373	0.865884	0.930915	0.736881	0.714985	0.874006	0.776902	11	11	11	11	11	11	11	11	11	Unique	4.28818	High	0	1.84e-06
FALSE	High	[R].SLSDGNILCDNTGGPVSDCNVGK.[N]	2xTMT6plex [N-Term; K23]; 2xCarbamidomethyl [C9; C19]; 1xPhospho [S/T]		6.01236e-05	0	1	1	6	Q10QV1	Q10QV1 [609-631]	0	2917.35	High	High	High	High	High	High	High	High	High	S3(Phospho): 98.87	1	1.22207	1.18447	1.42392	1.12393	1.24508	1.19227	1.18807	1.39094	4	4	4	4	4	4	4	4	4	Unique	4.19051	High	0	0.0001259
FALSE	High	[K].LGLGGLGGSPR.[A]	1xTMT6plex [N-Term]; 1xPhospho [S9(100)]	Q336R9 1xPhospho [S73(100)]	4.86901e-05	0	1	1	5	Q336R9	Q336R9 [65-75]	0	1292.69	High	High	High	High	High	High	High	High	High	S9(Phospho): 100	1	0.769374	0.648499	0.598105	0.602179	0.582469	0.554942	0.622369	0.699694	5	5	5	5	5	5	5	5	5	Unique	3.06859	High	0	4.934e-06
FALSE	High	[K].SASAIVLSQEIQR.[Y]	1xTMT6plex [N-Term]; 1xPhospho [S1(100)]	Q10PS3 1xPhospho [S675(100)]	3.52949e-05	0	1	1	11	Q10PS3	Q10PS3 [675-687]	0	1710.9	High	High	High	High	High	High	High	High	High	S1(Phospho): 100	1	1.17538	0.887872	1.06916	0.958058	0.893249	1.03223	1.00367	1.05799	7	7	7	7	7	7	7	7	7	Unique	4.26104	High	0	5.475e-06
FALSE	High	[K].MAFGSGNLESSQQTQPTEFVPNR.[S]	1xTMT6plex [N-Term]; 1xOxidation [M1(100)]; 1xPhospho [S5(100)]	Q8W0B8 1xPhospho [S544(100)]	0.000177059	0	1	1	1	Q8W0B8	Q8W0B8 [540-562]	0	2850.3	High	High	High	High	High	High	High	High	High	M1(Oxidation): 100; S5(Phospho): 100	1	1.00892	0.901224	0.953841	0.976154	0.81702	1.36652	1.23802	1.53933	1	1	1	1	1	1	1	1	1	Unique	3.29896	High	0	2.224e-05
FALSE	High	[K].VIEEEEGEGSGNAANAVTAAENGTPVK.[A]	2xTMT6plex [N-Term; K27]; 1xPhospho [S10(100)]	Q8S3S1 1xPhospho [S117(100)]	0.00062006	0	1	1	1	Q8S3S1	Q8S3S1 [108-134]	0	3181.53	High	High	High	High	High	High	High	High	High	S10(Phospho): 99.98	1	1.06779	1.15681	1.00466	0.859538	0.679221	0.859876	0.895136	0.997668	1	1	1	1	1	1	1	1	1	Unique	2.7648	High	0	9.619e-05
FALSE	High	[R].GPSGFPGGGGGGGSDSDEPQEYYTGGEK.[S]	2xTMT6plex [N-Term; K28]; 2xPhospho [S14(100); S16(100)]	Q0JCK5 2xPhospho [S46(98.2); S48(98.2)]	2.04933e-08	0	1	1	3	Q0JCK5	Q0JCK5 [33-60]	0	3264.34	High	High	High	High	High	High	High	High	High	S14(Phospho): 100; S16(Phospho): 100	1	1.0617	1.06335	1.29003	1.136	1.11998	1.35895	1.35327	1.57552	3	3	3	3	3	3	3	3	3	Unique	5.19977	High	0	9.584e-10
FALSE	High	[K].APSLAEEYSLPPQEAPVEK.[A]	2xTMT6plex [N-Term; K19]; 1xPhospho [S9(100)]	Q9SXV0 1xPhospho [S15(100)]	6.57869e-08	0	1	1	31	Q9SXV0	Q9SXV0 [7-25]	0	2593.32	High	High	High	High	High	High	High	High	High	S9(Phospho): 100	1	1.08707	0.939371	0.994888	0.96208	0.818974	0.989615	1.01327	0.998874	16	16	16	16	16	16	16	16	16	Unique	5.67739	High	0	3.781e-09
FALSE	High	[R].LGSSAYSLR.[D]	1xTMT6plex [N-Term]; 2xPhospho [S3(100); S4(100)]	Q688U6 2xPhospho [S50(100); S51(100)]	0.0014044	0	1	1	13	Q688U6	Q688U6 [48-56]	0	1342.6	High	High	High	High	High	High	High	High	High	S3(Phospho): 100; S4(Phospho): 100	1	0.725729	0.898363	0.521876	0.611227	0.796496	0.656271	0.916266	1.22929	13	13	13	13	13	13	13	13	13	Unique	3.83936	High	0	0.0002525
FALSE	High	[K].TSPGSSPASVAAAPGGLDAVR.[T]	1xTMT6plex [N-Term]; 2xPhospho [S6(100); T/S]		5.2698e-05	0	1	1	4	Q6EU10	Q6EU10 [102-122]	0	2257.05	High	High	High	High	High	High	High	High	High	S2(Phospho): 99; S5(Phospho): 99	1	1.04038	0.992776	1.09262	1.02441	0.847316	1.17996	1.09875	1.27513	4	4	4	4	4	4	4	4	4	Unique	4.17518	High	0	5.411e-06
FALSE	High	[K].AAGLNESDADEDDEDDDQEDESSPVLAPK.[Q]	2xTMT6plex [N-Term; K29]; 1xPhospho [S7(100)]	Q53QT1 1xPhospho [S354(100)]	3.61034e-09	0	1	1	6	Q53QT1	Q53QT1 [348-376]	0	3614.54	High	High	High	High	High	High	High	High	High	S7(Phospho): 100	1	1.11955	1.04237	1.11509	1.08875	1.11021	1.34474	1.50406	1.48987	6	6	6	6	6	6	6	6	6	Unique	6.17565	High	0	7.582e-11
FALSE	High	[K].DYEEVGAESDENEDGDDGDEY.[-]	1xTMT6plex [N-Term]; 1xPhospho [S9(100)]	Q75GI3 1xPhospho [S439(100)]	3.82783e-06	0	1	2	28	Q75GI3	Q75GI3 [431-451]	0	2660.94	High	High	High	High	High	High	High	High	High	S9(Phospho): 100	1	1.13376	0.986101	1.01834	0.881655	0.880544	0.97541	0.954684	1.19069	21	21	21	21	21	21	21	21	21	Unique	4.8033	High	0	1.276e-06
FALSE	High	[R].LPISSSPDAAEDNDNFR.[I]	1xTMT6plex [N-Term]; 1xPhospho [S6(99.5)]	B9GCH9 1xPhospho [S664(99.3)]	7.26088e-07	0	1	1	18	B9GCH9	B9GCH9 [659-675]	0	2156.97	High	High	High	High	High	High	High	High	High	S6(Phospho): 99.42	1	1.0414	0.907899	1.04864	0.978165	1.01346	1.25477	1.22073	1.39215	9	9	9	9	9	9	9	9	9	Unique	4.21893	High	0	3.658e-08
FALSE	High	[K].YCLLEASDDESEASNSSK.[E]	2xTMT6plex [N-Term; K18]; 1xCarbamidomethyl [C2]; 1xPhospho [S7(100)]	Q2QM48 1xPhospho [S773(100)]	4.6758e-09	0	1	1	8	Q2QM48	Q2QM48 [767-784]	0	2543.13	High	High	High	High	High	High	High	High	High	S7(Phospho): 100	1	1.09722	1.0891	1.29883	1.34309	1.27635	1.483	1.57705	1.66238	6	6	6	6	6	6	6	6	6	Unique	5.70241	High	0	1.027e-10
FALSE	High	[R].ELSEIAEQAK.[R]	2xTMT6plex [N-Term; K10]; 1xPhospho [S3(100)]	Q7XPY2 1xPhospho [S906(100)]	0.000856113	0	1	4	2	Q7XPY2	Q7XPY2 [904-913]	0	1655.87	High	High	High	High	High	High	High	High	High	S3(Phospho): 100	1	0.941925	0.629426	0.565854	0.5871	0.48083	0.505698	0.548415	0.456008	2	2	2	2	2	2	2	2	2	Unique	3.69771	High	0	0.0001406
FALSE	High	[R].SNTLTASHLAMVGAK.[V]	2xTMT6plex [N-Term; K15]; 1xOxidation [M11(100)]; 2xPhospho [T3(98.2); T/S]	A0A0P0Y9R2 2xPhospho [T49(98.2); T/S]	0.00116739	0	1	1	3	A0A0P0Y9R2	A0A0P0Y9R2 [47-61]	0	2135.04	High	High	High	High	High	High	High	High	High	T3(Phospho): 98.25; T5(Phospho): 50.29; S7(Phospho): 50.29; M11(Oxidation): 100	1	1.04343	0.846864	1.05939	1.04351	1.12682	1.29455	1.17078	1.31736	1	1	1	1	1	1	1	1	1	Unique	2.86373	High	0	0.0002038
FALSE	High	[R].SNTLTASHLAMVGAK.[V]	2xTMT6plex [N-Term; K15]; 2xPhospho [S7(99.5); S/T]	A0A0P0Y9R2 2xPhospho [T49(98.5); S53(99.3)]	3.60476e-05	0	1	1	8	A0A0P0Y9R2	A0A0P0Y9R2 [47-61]	0	2119.04	High	High	High	High	High	High	High	High	High	S1(Phospho): 99.1; T3(Phospho): 99.1	1	0.762269	0.761033	0.686062	0.843453	1.01346	0.947947	1.27259	1.2305	3	3	3	3	3	3	3	3	3	Unique	4.17391	High	0	3.481e-06
FALSE	High	[K].DTDILAAFR.[VI]	1xTMT6plex [N-Term]; 1xPhospho [T2(100)]	P0C512 1xPhospho [T34(100)]	0.000804414	0	1	4	1	P0C512	P0C512 [33-41]	0	1330.66	High	High	High	High	High	High	High	High	High	T2(Phospho): 100	1	0.850574	0.866891	1.08871	1.03044	1.03887	0.964046	1.01615	0.985604	1	1	1	1	1	1	1	1	1	Unique	2.71148	High	0	0.0001312
FALSE	High	[K].LESNAELDGELDSDSETGK.[E]	2xTMT6plex [N-Term; K19]; 2xPhospho [S13(98.6); S15(98.6)]	Q2QNI2 2xPhospho [S749(98.6); S751(98.6)]	0.00146307	0	1	2	1	Q2QNI2	Q2QNI2 [737-755]	0	2627.14	High	High	High	High	High	High	High	High	High	S13(Phospho): 98.64; S15(Phospho): 98.64	1	1.3124	1.39713	1.3389	1.33605	1.17373	1.55308	1.20824	1.79266	1	1	1	1	1	1	1	1	1	Unique	2.92929	High	0	0.0002653
FALSE	High	[K].LESNAELDGELDSDSETGK.[E]	2xTMT6plex [N-Term; K19]; 1xPhospho [S13(99.4)]	Q2QNI2 1xPhospho [S749(99.7)]	2.607e-10	0	1	2	7	Q2QNI2	Q2QNI2 [737-755]	0	2547.18	High	High	High	High	High	High	High	High	High	S13(Phospho): 100	1	0.97136	0.915529	1.02812	0.855517	0.933318	1.03223	1.08723	1.09659	4	4	4	4	4	4	4	4	4	Unique	6.17708	High	0	3.544e-12
FALSE	High	[R].SPLASLSPK.[R]	2xTMT6plex [N-Term; K9]; 2xPhospho [S1(100); S]	A0A0P0VG74 2xPhospho [S326(100); S332(99)]	7.30738e-05	0	1	1	14	A0A0P0VG74	A0A0P0VG74 [326-334]	0	1517.78	High	High	High	High	High	High	High	High	High	S1(Phospho): 100; S5(Phospho): 50; S7(Phospho): 50	1	0.87392	0.949861	0.931363	0.963085	0.944068	0.973516	1.17559	1.10624	14	14	14	14	14	14	14	14	14	Unique	4.67112	High	0	7.904e-06
FALSE	High	[R].LVYTNDQGEIVK.[G]	2xTMT6plex [N-Term; K12]; 1xPhospho [T4(100)]	Q6ZFJ3 1xPhospho [T173(100)]; P41344 1xPhospho [T169(100)]	1.89386e-05	0	2	3	9	Q6ZFJ3; P41344	Q6ZFJ3 [170-181]; P41344 [166-177]	0	1917.01	High	High	High	High	High	High	High	High	High	T4(Phospho): 100	1	1.13376	1.20926	1.35453	1.36521	1.4161	1.71502	1.50886	2.05445	7	7	7	7	7	7	7	7	7	Not Unique	4.32413	High	0	5.548e-06
FALSE	High	[R].SSSFGPQTSGFQQSESFK.[Q]	2xTMT6plex [N-Term; K18]; 2xPhospho [S16(100); S/T]	Q69V56 2xPhospho [S377(100); S/T]	2.20294e-07	0	1	2	16	Q69V56	Q69V56 [362-379]	0	2554.13	High	High	High	High	High	High	High	High	High	S3(Phospho): 99.42; S16(Phospho): 100	1	1.00892	1.02234	1.18546	1.0606	1.14735	1.33148	1.53191	1.39094	14	14	14	14	14	14	14	14	14	Unique	6.22819	High	0	9.134e-09
FALSE	High	[R].SSSFGPQTSGFQQSESFK.[Q]	2xTMT6plex [N-Term; K18]; 1xPhospho [S/T]	Q69V56 1xPhospho [S377(100)]	3.38337e-08	0	1	2	16	Q69V56	Q69V56 [362-379]	0	2474.16	High	High	High	High	High	High	High	High	High	S3(Phospho): 98.96	1	1.02313	1.14155	1.11509	1.05758	1.06623	1.34663	1.41858	1.33183	8	8	8	8	8	8	8	8	8	Unique	5.93845	High	0	1.03e-09
FALSE	High	[R].SFTHINEDAALESPKEE.[-]	2xTMT6plex [N-Term; K15]; 2xPhospho [S1(100); S13(100)]	Q8LI83 2xPhospho [S624(100); S636(100)]	3.11439e-09	0	1	1	10	Q8LI83	Q8LI83 [624-640]	1	2535.15	High	High	High	High	High	High	High	High	High	S1(Phospho): 100; S13(Phospho): 100	1	1.04038	0.986101	1.06232	0.952027	1.04766	1.04644	1.14581	1.12313	6	6	6	6	6	6	6	6	6	Unique	6.832	High	0	6.373e-11
FALSE	High	[K].EFGVTNEDSEVAEQSE.[-]	1xTMT6plex [N-Term]; 1xPhospho [S15(100)]	Q10LF7 1xPhospho [S534(100)]	0.000291741	0	1	1	3	Q10LF7	Q10LF7 [520-535]	0	2078.86	High	High	High	High	High	High	High	High	High	S15(Phospho): 100	1	1.15	0.947	1.00466	0.954037	1.10728	1.21027	1.17559	1.20034	3	3	3	3	3	3	3	3	3	Unique	2.68818	High	0	0.0001148
FALSE	High	[K].NQSSLEYIDSTANVDEGGSPEK.[L]	2xTMT6plex [N-Term; K22]; 1xPhospho [S19(100)]	Q10KI0 1xPhospho [S366(100)]	1.99821e-12	0	1	1	9	Q10KI0	Q10KI0 [348-369]	0	2878.34	High	High	High	High	High	High	High	High	High	S19(Phospho): 100	1	1.07083	1.01853	1.0848	0.858533	0.923545	1.0578	1.02384	1.1738	9	9	9	9	9	9	9	9	9	Unique	7.1202	High	0	1.21e-14
FALSE	High	[R].TDDIVPGSSVTEDASDSETLPR.[I]	1xTMT6plex [N-Term]; 1xPhospho [S15(99.5)]	A0A0P0XYL0 1xPhospho [S73(100)]	4.10636e-07	0	1	1	6	A0A0P0XYL0	A0A0P0XYL0 [59-80]	0	2600.18	High	High	High	High	High	High	High	High	High	S15(Phospho): 99.46	1	1.06779	0.935556	1.11509	1.02541	1.06916	1.2472	1.14389	1.29926	5	5	5	5	5	5	5	5	5	Unique	4.40024	High	0	1.37e-07
FALSE	High	[K].VVSTQAPVQLGSLR.[A]	1xTMT6plex [N-Term]; 1xPhospho [S12(100)]	A3C4S4 1xPhospho [S370(100)]	1.27711e-06	0	1	1	6	A3C4S4	A3C4S4 [359-372]	0	1763.96	High	High	High	High	High	High	High	High	High	S12(Phospho): 100	1	1.0079	0.811578	1.05743	1.01938	0.902044	1.00003	1.05361	1.07608	6	6	6	6	6	6	6	6	6	Unique	5.31616	High	0	7.097e-08
FALSE	High	[K].NSTEDGNNSWPSSPVAASQPTNQADAIPDLK.[L]	2xTMT6plex [N-Term; K31]; 2xPhospho [S9(96.7); S/T]	Q7XBX2 2xPhospho [S136(100); S/T]	1.12518e-06	0	1	1	7	Q7XBX2	Q7XBX2 [128-158]	0	3829.74	High	High	High	High	High	High	High	High	High	S9(Phospho): 100; S13(Phospho): 98.71	1	1.04647	1.00708	0.973387	0.922873	1.08969	1.06064	1.04497	1.13037	4	4	4	4	4	4	4	4	4	Unique	4.60549	High	0	6.103e-08
FALSE	High	[R].VEGFFPHDDAAAAESPSK.[S]	2xTMT6plex [N-Term; K18]; 1xPhospho [S15(99.4)]	Q94GF4 1xPhospho [S98(99.4)]	0.000552781	0	1	1	1	Q94GF4	Q94GF4 [84-101]	0	2413.15	High	High	High	High	High	High	High	High	High	S15(Phospho): 99.35	1	1.35808	1.13297	1.22748	1.14505	1.01052	1.46311	1.51654	1.45609	1	1	1	1	1	1	1	1	1	Unique	2.8521	High	0	8.42e-05
FALSE	High	[K].NVIAEADAGGSPALIAR.[G]	1xTMT6plex [N-Term]; 1xPhospho [S11(100)]	A0A0P0XB22 1xPhospho [S230(100)]	1.56249e-10	0	1	1	7	A0A0P0XB22	A0A0P0XB22 [220-236]	0	1933.99	High	High	High	High	High	High	High	High	High	S11(Phospho): 100	1	1.05256	0.963212	0.974364	0.91282	0.873703	0.995297	0.928752	0.944587	7	7	7	7	7	7	7	7	7	Unique	7.05235	High	0	1.954e-12
FALSE	High	[R].GPSGFPGGGGGGGSDSDEPQEYYTGGEK.[S]	2xTMT6plex [N-Term; K28]; 1xPhospho [S/Y/T]		4.6661e-11	0	1	1	66	Q0JCK5	Q0JCK5 [33-60]	0	3184.38	High	High	High	High	High	High	High	High	High	S16(Phospho): 99.99	1	1.10128	1.05763	1.12682	1.00933	0.893249	1.04265	1.117	1.16294	30	30	30	30	30	30	30	30	30	Unique	6.73431	High	0	1.673e-12
FALSE	High	[K].ADTIDEAVDSSETVPSAR.[-]	1xTMT6plex [N-Term]; 1xPhospho [S10(99.5)]	Q6ZIG4 1xPhospho [S369(99.5)]	2.64556e-06	0	1	1	2	Q6ZIG4	Q6ZIG4 [360-377]	0	2171.99	High	High	High	High	High	High	High	High	High	S10(Phospho): 99.47	1	1.30022	1.32084	1.20892	1.18425	0.847316	1.67619	1.22361	1.37647	1	1	1	1	1	1	1	1	1	Unique	3.37623	High	0	1.659e-07
FALSE	High	[K].GNLEDSETDSLAESPQGGK.[G]	2xTMT6plex [N-Term; K19]; 2xPhospho [S6(100); S10(99.3)]	Q8H991 2xPhospho [S556(100); T/S]	6.93214e-05	0	1	1	2	Q8H991	Q8H991 [551-569]	0	2552.12	High	High	High	High	High	High	High	High	High	S6(Phospho): 100; S10(Phospho): 99.34	1	0.968315	0.885965	1.02714	1.03044	0.901067	1.35232	1.31485	1.44523	2	2	2	2	2	2	2	2	2	Unique	3.21152	High	0	7.466e-06
FALSE	High	[K].SNTDDLTGGFNK.[S]	2xTMT6plex [N-Term; K12]; 1xPhospho [T3(100)]	A0A0P0WAD7 1xPhospho [T75(100)]	6.7518e-05	0	1	1	8	A0A0P0WAD7	A0A0P0WAD7 [73-84]	0	1806.87	High	High	High	High	High	High	High	High	High	T3(Phospho): 100	1	1.02008	0.925065	0.93625	0.998271	0.928431	1.29928	1.20344	1.1738	7	7	7	7	7	7	7	7	7	Unique	3.78776	High	0	7.223e-06
FALSE	High	[R].QNSEISYYADDEDANR.[K]	1xTMT6plex [N-Term]; 1xPhospho [S3(100)]	Q339K7 1xPhospho [S254(100)]	1.70642e-09	0	1	1	10	Q339K7	Q339K7 [252-267]	0	2198.91	High	High	High	High	High	High	High	High	High	S3(Phospho): 100	1	0.978465	0.912668	0.890317	0.819326	0.854157	1.00193	0.961407	1.01456	10	10	10	10	10	10	10	10	10	Unique	5.67917	High	0	3.16e-11
FALSE	High	[-K].ELDYLVGAVSSPK.[R]	2xTMT6plex [N-Term; K13]; 1xPhospho [S11(99.7)]	A0A0P0WP33 1xPhospho [S267(99.7)]	1.06172e-06	0	1	3	4	A0A0P0WP33	A0A0P0WP33 [257-269]	0	1916.02	High	High	High	High	High	High	High	High	High	S11(Phospho): 100	1	0.933805	0.964166	1.06232	1.2124	1.19523	1.15629	1.28124	1.22808	2	2	2	2	2	2	2	2	2	Unique	4.40853	High	0	5.701e-08
FALSE	High	[K].GLVPLAGSNNESWCQGLDGLASR.[E]	1xTMT6plex [N-Term]; 1xCarbamidomethyl [C14]; 1xPhospho [S22(100)]	Q40677 1xPhospho [S151(99.3)]	3.05071e-06	0	1	1	3	Q40677	Q40677 [140-162]	0	2710.29	High	High	High	High	High	High	High	High	High	S22(Phospho): 100	1	1.2444	1.28651	1.2353	1.10885	1.18351	1.66199	1.1996	1.21964	2	2	2	2	2	2	2	2	2	Unique	4.90973	High	0	1.949e-07
FALSE	High	[K].VPDLGGADSCGDDR.[A]	1xTMT6plex [N-Term]; 1xCarbamidomethyl [C10]; 1xPhospho [S9(100)]	Q2R2Z2 1xPhospho [S95(100)]	2.00007e-06	0	1	1	8	Q2R2Z2	Q2R2Z2 [87-100]	0	1742.73	High	High	High	High	High	High	High	High	High	S9(Phospho): 100	1	0.845499	0.897409	0.915727	0.863559	0.865884	1.28413	1.2409	1.30409	8	8	8	8	8	8	8	8	8	Unique	4.68418	High	0	1.193e-07
FALSE	High	[K].ILPWGDEAYAGGSANAPR.[G]	1xTMT6plex [N-Term]; 1xPhospho [S13(100)]	Q10M12 1xPhospho [S188(100)]	3.53493e-09	0	1	1	3	Q10M12	Q10M12 [176-193]	0	2154.02	High	High	High	High	High	High	High	High	High	S13(Phospho): 100	1	1.17132	1.04809	1.06623	0.885676	0.98316	1.13829	1.04016	0.930111	3	3	3	3	3	3	3	3	3	Unique	5.49191	High	0	7.38e-11
FALSE	High	[R].LQIWQYGDVESDEEEQAPAAR.[R]	1xTMT6plex [N-Term]; 1xPhospho [S11(100)]	Q6H547 1xPhospho [S970(100)]	2.25248e-11	0	1	2	15	Q6H547	Q6H547 [960-980]	0	2743.24	High	High	High	High	High	High	High	High	High	S11(Phospho): 100	1	1.04952	1.06239	1.04766	1.02541	0.955796	1.26993	1.22457	1.35596	14	14	14	14	14	14	14	14	14	Unique	6.81383	High	0	3.14e-13
FALSE	High	[R].TADDEGGVVTEHQSPPPANGLPSTPPR.[Q]	1xTMT6plex [N-Term]; 2xPhospho [S14(100); S/T]	Q5Z7T2 2xPhospho [S26(100); T36(99.1)]	7.34601e-05	0	1	1	10	Q5Z7T2	Q5Z7T2 [13-39]	0	3115.4	High	High	High	High	High	High	High	High	High	S14(Phospho): 99.99; T24(Phospho): 99.99	1	1.05865	1.11199	1.15907	1.11589	1.14246	1.47259	1.33406	1.7239	8	8	8	8	8	8	8	8	8	Unique	3.49973	High	0	1.214e-05
FALSE	High	[K].LELSAVPSSYYSGQLDPDR.[V]	1xTMT6plex [N-Term]; 1xPhospho [S12(99)]	Q8S3Q3 1xPhospho [S324(100)]	1.64529e-06	0	1	1	18	Q8S3Q3	Q8S3Q3 [313-331]	0	2406.14	High	High	High	High	High	High	High	High	High	S12(Phospho): 100	1	1.25658	1.08528	1.19914	1.05658	1.06428	1.32296	1.34366	1.62619	4	4	4	4	4	4	4	4	4	Unique	4.58574	High	0	9.49e-08
FALSE	High	[K].DYEEVGSEFDDGDEGDEGDEY.[-]	1xTMT6plex [N-Term]; 1xPhospho [S7(100)]	Q53M52 1xPhospho [S437(100)]	2.81318e-05	0	1	2	8	Q53M52	Q53M52 [431-451]	0	2679.95	High	High	High	High	High	High	High	High	High	S7(Phospho): 100	1	1.34488	0.992776	0.946023	0.835411	0.750563	0.901544	0.879769	1.03024	8	8	8	8	8	8	8	8	8	Unique	4.58437	High	0	1.517e-05
FALSE	High	[K].DVLNHIQGEGSVGTTEPESSSK.[A]	2xTMT6plex [N-Term; K22]; 1xPhospho [S11(100)]	Q5ZAJ0 1xPhospho [S750(100)]	0.0001291	0	1	1	1	Q5ZAJ0	Q5ZAJ0 [740-761]	0	2809.37	High	High	High	High	High	High	High	High	High	S11(Phospho): 100	1	1.22714	0.974657	1.27342	1.14304	0.988046	1.10041	1.15446	1.33304	1	1	1	1	1	1	1	1	1	Unique	3.8341	High	0	1.537e-05
FALSE	High	[R].GSGAGPSSLGSPLK.[V]	2xTMT6plex [N-Term; K14]; 1xPhospho [S11(100)]	Q7XDE0 1xPhospho [S119(100)]	7.42386e-05	0	1	1	6	Q7XDE0	Q7XDE0 [109-122]	0	1752.93	High	High	High	High	High	High	High	High	High	S11(Phospho): 100	1	1.00993	0.929834	0.861975	0.953032	0.954818	0.849459	0.842311	0.868586	6	6	6	6	6	6	6	6	6	Unique	4.28445	High	0	1.38e-05
FALSE	High	[R].FESAGGESDKSPVK.[E]	3xTMT6plex [N-Term; K10; K14]; 2xPhospho [S8(100); S11(100)]	Q2QTN6 2xPhospho [S236(100); S239(100)]	7.24881e-06	0	1	1	6	Q2QTN6	Q2QTN6 [229-242]	1	2285.11	High	High	High	High	High	High	High	High	High	S8(Phospho): 100; S11(Phospho): 100	1	1.11448	0.925065	1.14344	0.906788	1.02225	1.06443	1.19864	1.22808	6	6	6	6	6	6	6	6	6	Unique	4.75988	High	0	6.677e-07
FALSE	High	[R].SFDDSFDREDDGSDPDEGER.[R]	1xTMT6plex [N-Term]; 1xPhospho [S13(100)]	Q10E42 1xPhospho [S427(100)]	0.000969453	0	1	1	3	Q10E42	Q10E42 [415-434]	1	2598.99	High	High	High	High	High	High	High	High	High	S13(Phospho): 100	1	1.04038	0.935556	1.25778	1.57733	1.48158	1.61179	1.46564	1.40904	3	3	3	3	3	3	3	3	3	Unique	3.21867	High	0	0.0001628
FALSE	High	[K].EMNETDVPISYSGAGNPEK.[S]	2xTMT6plex [N-Term; K19]; 1xOxidation [M2(100)]; 1xPhospho [S12(100)]	Q10NP2 1xPhospho [S609(98.3)]	1.45958e-07	0	1	1	14	Q10NP2	Q10NP2 [598-616]	0	2592.19	High	High	High	High	High	High	High	High	High	M2(Oxidation): 100; S12(Phospho): 99.99	1	1.05053	0.995637	1.07405	1.16314	1.033	1.34758	1.24666	1.30288	5	5	5	5	5	5	5	5	5	Unique	4.0457	High	0	5.645e-09
FALSE	High	[K].EMNETDVPISYSGAGNPEK.[S]	2xTMT6plex [N-Term; K19]; 1xPhospho [S12(100)]	Q10NP2 1xPhospho [S609(100)]	2.53504e-09	0	1	1	33	Q10NP2	Q10NP2 [598-616]	0	2576.2	High	High	High	High	High	High	High	High	High	S12(Phospho): 100	1	0.96933	1.12629	0.966546	1.00531	1.05059	1.08242	1.15446	1.06522	13	13	13	13	13	13	13	13	13	Unique	5.65285	High	0	5.031e-11
FALSE	High	[K].SSSTIENFFSGR.[T]	1xTMT6plex [N-Term]; 1xPhospho [S3(99.1)]	Q337B2 1xPhospho [S396(100)]	6.0761e-05	0	1	1	4	Q337B2	Q337B2 [394-405]	0	1640.75	High	High	High	High	High	High	High	High	High	S3(Phospho): 99.7	1	1.06677	0.880243	1.01443	0.819326	0.942114	0.838095	0.975813	0.957857	2	2	2	2	2	2	2	2	2	Unique	3.52613	High	0	6.38e-06
FALSE	High	[R].LSENTEIQSAK.[L]	2xTMT6plex [N-Term; K11]; 1xPhospho [S2(100)]	Q9ST27 1xPhospho [S503(100)]	9.43745e-06	0	1	2	5	Q9ST27	Q9ST27 [502-512]	0	1757.91	High	High	High	High	High	High	High	High	High	S2(Phospho): 100	1	0.93888	0.88215	0.897158	0.906788	0.99391	1.0739	1.10643	1.23532	5	5	5	5	5	5	5	5	5	Unique	4.0974	High	0	7.267e-07
FALSE	High	[R].IILAAAAAAANSTAGESSPVAGPQENEK.[V]	2xTMT6plex [N-Term; K28]; 1xPhospho [T/S]		6.47957e-15	0	1	1	36	Q6Z9X3	Q6Z9X3 [462-489]	0	3176.62	High	High	High	High	High	High	High	High	High	T13(Phospho): 98.9	1	1.09722	0.967027	1.15028	1.01938	0.998797	0.964046	0.905701	1.03748	8	8	8	8	8	8	8	8	8	Unique	8.50922	High	0	1.561e-17
FALSE	High	[R].GPVLVMSGSGNR.[L]	1xTMT6plex [N-Term]; 1xPhospho [S9(100)]	Q10N66 1xPhospho [S116(100)]	4.79258e-05	0	1	1	10	Q10N66	Q10N66 [108-119]	0	1482.73	High	High	High	High	High	High	High	High	High	S9(Phospho): 100	1	1.1023	1.02139	1.08284	1.07065	0.97241	1.10231	1.10643	1.15208	9	9	9	9	9	9	9	9	9	Unique	3.87254	High	0	2.769e-05
FALSE	High	[R].VQSMQQPELQTNPANASR.[Y]	1xTMT6plex [N-Term]; 1xPhospho [S3(100)]	Q7XXI7 1xPhospho [S278(100)]	0.000254503	0	1	1	2	Q7XXI7	Q7XXI7 [276-293]	0	2308.1	High	High	High	High	High	High	High	High	High	S3(Phospho): 100	1	2.02798	1.02043	1.22748	1.14304	1.00662	1.2633	1.45604	1.62498	2	2	2	2	2	2	2	2	2	Unique	3.78731	High	0	3.403e-05
FALSE	High	[K].EEIGDLEQDSNSSSDNAPR.[S]	1xTMT6plex [N-Term]; 1xPhospho [S12(99.4)]	Q2QLM6 1xPhospho [S467(99.3)]	1.01783e-06	0	1	3	6	Q2QLM6	Q2QLM6 [456-474]	0	2372.01	High	High	High	High	High	High	High	High	High	S12(Phospho): 99.37	1	1.03328	0.96512	1.07307	0.883666	0.984137	1.32106	1.22265	1.62257	3	3	3	3	3	3	3	3	3	Unique	4.07967	High	0	5.423e-08
FALSE	High	[R].NFSELTVSWSDENK.[E]	2xTMT6plex [N-Term; K14]; 1xPhospho [S3(100)]	Q0JGK4 1xPhospho [S179(100)]	1.86745e-06	0	1	2	5	Q0JGK4	Q0JGK4 [177-190]	0	2194.05	High	High	High	High	High	High	High	High	High	S3(Phospho): 100	1	0.95309	0.865938	0.763268	0.900756	0.833634	0.948894	0.98926	1.14364	5	5	5	5	5	5	5	5	5	Unique	4.9729	High	0	1.105e-07
FALSE	High	[K].EESNVKGDSEDDEPVMVVAK.[M]	3xTMT6plex [N-Term; K6; K20]; 1xPhospho [S9(100)]	Q0JAK9 1xPhospho [S674(100)]	3.03465e-06	0	1	2	6	Q0JAK9	Q0JAK9 [666-685]	1	2944.45	High	High	High	High	High	High	High	High	High	S9(Phospho): 100	1	1.16726	0.994684	0.887385	0.62128	0.689971	0.588087	0.552257	0.638169	6	6	6	6	6	6	6	6	6	Unique	4.66586	High	0	1.936e-07
FALSE	High	[K].LGIPAAAAAAGASSAASADGASPR.[G]	1xTMT6plex [N-Term]; 1xPhospho [S22(100)]	Q7Y163 1xPhospho [S64(100)]	1.76049e-12	0	1	1	2	Q7Y163	Q7Y163 [43-66]	0	2320.15	High	High	High	High	High	High	High	High	High	S22(Phospho): 100	1	1.03023	1.0128	0.965569	0.942979	1.10434	1.08621	1.10163	1.32218	2	2	2	2	2	2	2	2	2	Unique	7.10523	High	0	1.046e-14
FALSE	High	[R].LGANVGSAQGPTGLGK.[Y]	2xTMT6plex [N-Term; K16]; 1xPhospho [S7(100)]	P0C367 1xPhospho [S330(100)]	2.27796e-05	0	1	1	1	P0C367	P0C367 [324-339]	0	1965.06	High	High	High	High	High	High	High	High	High	S7(Phospho): 100	1	0.990645	1.06621	1.13073	1.08573	1.16201	1.04833	1.28988	1.28116	1	1	1	1	1	1	1	1	1	Unique	3.97191	High	0	2.032e-06
FALSE	High	[K].TPYHSMIDEDDGTVSPK.[R]	2xTMT6plex [N-Term; K17]; 1xPhospho [S15(100)]	Q6K5F6 1xPhospho [S56(100)]	0.000110228	0	1	1	1	Q6K5F6	Q6K5F6 [42-58]	0	2430.13	High	High	High	High	High	High	High	High	High	S15(Phospho): 100	1	1.0282	0.88215	0.882498	0.925889	0.787701	1.16481	1.06898	1.07005	1	1	1	1	1	1	1	1	1	Unique	3.49431	High	0	1.28e-05
FALSE	High	[R].LTAGGSDETQEAISPK.[S]	2xTMT6plex [N-Term; K16]; 2xPhospho [S6(100); S14(100)]	Q69T30 2xPhospho [S365(100); S373(100)]	2.68778e-06	0	1	1	6	Q69T30	Q69T30 [360-375]	0	2222.04	High	High	High	High	High	High	High	High	High	S6(Phospho): 100; S14(Phospho): 100	1	1.05865	1.00994	1.14441	1.07065	1.08578	1.33338	1.30525	1.45971	6	6	6	6	6	6	6	6	6	Unique	4.72359	High	0	1.681e-07
FALSE	High	[K].SSADNVLPSSPVAASQPQNPSDDFPEFK.[L]	2xTMT6plex [N-Term; K28]; 1xPhospho [S]		3.2539e-10	0	1	1	20	Q84T71	Q84T71 [124-151]	0	3469.66	High	High	High	High	High	High	High	High	High	S10(Phospho): 99.22	1	1.17436	1.10531	0.689971	0.663503	0.609833	0.755706	0.638697	0.827569	7	7	7	7	7	7	7	7	7	Unique	6.13471	High	0	4.596e-12
FALSE	High	[R].ELNLLDTGCSTPQREEQHKD.[-]	2xTMT6plex [N-Term; K19]; 1xCarbamidomethyl [C9]; 1xPhospho [T11(99.2)]	Q6K9M2 1xPhospho [T365(99.2)]	0.0016621	0	1	1	2	Q6K9M2	Q6K9M2 [355-374]	2	2908.39	High	High	High	High	High	High	High	High	High	T11(Phospho): 99.22	1	0.775464	0.714303	1.1581	0.970122	0.981205	1.15913	1.17559	1.16897	1	1	1	1	1	1	1	1	1	Unique	3.37632	High	0	0.0003096
FALSE	High	[R].SAPTTPIKDGASSPFAAALSEEER.[Q]	2xTMT6plex [N-Term; K8]; 2xPhospho [S1(100); T/S]	Q10NX2 2xPhospho [S50(100); T/S]	7.19619e-08	0	1	1	3	Q10NX2	Q10NX2 [50-73]	1	3050.45	High	High	High	High	High	High	High	High	High	S1(Phospho): 100; T4(Phospho): 50; T5(Phospho): 50	1	1.30022	0.988008	1.29687	1.15208	1.05059	1.0578	1.11124	0.914428	3	3	3	3	3	3	3	3	3	Unique	5.83157	High	0	2.476e-09
FALSE	High	[R].SAPTTPIKDGASSPFAAALSEEER.[Q]	2xTMT6plex [N-Term; K8]; 3xPhospho [S1(100); S13(98.7); T/S]	Q10NX2 3xPhospho [S50(100); T/S]	2.40138e-05	0	1	1	2	Q10NX2	Q10NX2 [50-73]	1	3130.42	High	High	High	High	High	High	High	High	High	S1(Phospho): 100; T4(Phospho): 50; T5(Phospho): 50; S13(Phospho): 98.73	1	0.91046	0.816346	1.0848	0.906788	1.0203	1.26898	1.15926	1.33666	2	2	2	2	2	2	2	2	2	Unique	4.02799	High	0	2.161e-06
FALSE	High	[R].DDYSPGESLSPHGQDK.[R]	2xTMT6plex [N-Term; K16]; 3xPhospho [S4(100); S8(100); S10(100)]	Q10L03 3xPhospho [S197(100); S201(100); S203(100)]	9.61971e-08	0	1	1	10	Q10L03	Q10L03 [194-209]	0	2429.97	High	High	High	High	High	High	High	High	High	S4(Phospho): 100; S8(Phospho): 100; S10(Phospho): 100	1	1.07794	0.855447	0.987069	0.884671	0.937227	0.923325	0.981576	1.1183	5	5	5	5	5	5	5	5	5	Unique	6.23875	High	0	3.486e-09
FALSE	High	[R].IAAATASAYSDDDDDSDEAQATRPEGEVK.[K]	2xTMT6plex [N-Term; K29]; 2xPhospho [S10(98.2); S16(100)]	Q9LGA3 2xPhospho [S102(98.2); S108(100)]	1.36588e-15	0	1	1	4	Q9LGA3	Q9LGA3 [93-121]	0	3616.56	High	High	High	High	High	High	High	High	High	S10(Phospho): 98.19; S16(Phospho): 100	1	1.04343	0.895502	1.08187	0.948005	0.99391	1.3419	1.41954	1.41025	4	4	4	4	4	4	4	4	4	Unique	9.3093	High	0	2.485e-18
FALSE	High	[R].IAAATASAYSDDDDDSDEAQATRPEGEVK.[K]	2xTMT6plex [N-Term; K29]; 1xPhospho [S10(100)]	Q9LGA3 1xPhospho [S102(100)]	2.06151e-15	0	1	1	28	Q9LGA3	Q9LGA3 [93-121]	0	3536.6	High	High	High	High	High	High	High	High	High	S10(Phospho): 99.99	1	1.08301	1.01662	0.809201	0.774087	0.793564	1.08053	1.02864	1.10865	15	15	15	15	15	15	15	15	15	Unique	8.41331	High	0	6.75e-17
FALSE	High	[K].DSDGEDSVAPVVTK.[L]	2xTMT6plex [N-Term; K14]; 1xPhospho [S2(100)]	Q6K272 1xPhospho [S722(100)]	8.88096e-05	0	1	1	3	Q6K272	Q6K272 [721-734]	0	1956.96	High	High	High	High	High	High	High	High	High	S2(Phospho): 100	1	1.09824	1.05095	0.973387	0.825358	0.965569	0.926166	1.06898	1.1364	3	3	3	3	3	3	3	3	3	Unique	3.49448	High	0	9.962e-06
FALSE	High	[R].LFGDDQSQETTNR.[V]	1xTMT6plex [N-Term]; 1xPhospho [T11(99.6)]	Q0D4F7 1xPhospho [T504(99.4)]	4.35854e-05	0	1	1	16	Q0D4F7	Q0D4F7 [494-506]	0	1819.81	High	High	High	High	High	High	High	High	High	T11(Phospho): 99.52	1	0.98963	1.15681	1.40047	1.3069	1.3301	1.27656	1.21881	1.21361	9	9	9	9	9	9	9	9	9	Unique	4.28614	High	0	2.834e-05
FALSE	High	[K].LEGASSLTTGENK.[N]	2xTMT6plex [N-Term; K13]; 1xPhospho [S/T]		0.000190594	0	1	3	6	Q5N8F0	Q5N8F0 [762-774]	0	1844.94	High	High	High	High	High	High	High	High	High	S5(Phospho): 99.55	1	1.17436	0.88215	1.26951	1.02843	0.858066	0.898703	1.12852	1.00008	3	3	3	3	3	3	3	3	3	Unique	3.14634	High	0	5.144e-05
FALSE	High	[R].GFVPFVPGSPVER.[S]	1xTMT6plex [N-Term]; 1xPhospho [S9(100)]	Q6UUW2 1xPhospho [S524(100)]	3.2383e-07	0	1	1	10	Q6UUW2	Q6UUW2 [516-528]	0	1696.87	High	High	High	High	High	High	High	High	High	S9(Phospho): 100	1	1.20177	1.10626	1.2353	1.16817	1.10239	1.09189	1.12084	1.2124	10	10	10	10	10	10	10	10	10	Unique	5.08113	High	0	1.429e-08
FALSE	High	[K].DLSQADFGR.[L]	1xTMT6plex [N-Term]; 1xPhospho [S3(100)]	A0A0P0Y1Y5 1xPhospho [S50(100)]	0.00133425	0	1	1	4	A0A0P0Y1Y5	A0A0P0Y1Y5 [48-56]	0	1317.6	High	High	High	High	High	High	High	High	High	S3(Phospho): 100	1	1.02516	0.846864	0.852202	0.803241	0.85318	1.05685	1.06513	1.06884	4	4	4	4	4	4	4	4	4	Unique	3.32585	High	0	0.0002381
FALSE	High	[K].AESTGDVAAAEPAPVSA.[-]	1xTMT6plex [N-Term]; 1xPhospho [S16(100)]	Q84T92 1xPhospho [S232(100)]	7.87166e-08	0	1	1	4	Q84T92	Q84T92 [217-233]	0	1851.86	High	High	High	High	High	High	High	High	High	S16(Phospho): 100	1	1.05662	0.84591	0.951886	0.967106	0.852202	0.894915	0.964288	1.12554	4	4	4	4	4	4	4	4	4	Unique	5.0013	High	0	6.061e-08
FALSE	High	[K].KPAVGSGTANDSDDDKPLSLK.[I]	4xTMT6plex [N-Term; K1; K16; K21]; 1xPhospho [S12(100)]	Q84ZL5 1xPhospho [S149(100)]	1.08162e-11	0	1	1	5	Q84ZL5	Q84ZL5 [138-158]	0	3111.67	High	High	High	High	High	High	High	High	High	S12(Phospho): 100	1	1.08504	1.05572	1.21478	1.02541	0.977296	1.01613	1.00847	0.86738	5	5	5	5	5	5	5	5	5	Unique	7.10538	High	0	8.709e-14
FALSE	High	[R].SPPLPPPPPGGPPQPAATR.[K]	1xTMT6plex [N-Term]; 1xPhospho [S1(100)]	Q5Z4U6 1xPhospho [S30(100)]	2.09736e-06	0	1	1	2	Q5Z4U6	Q5Z4U6 [30-48]	0	2140.12	High	High	High	High	High	High	High	High	High	S1(Phospho): 100	1	1.16523	0.967027	1.10728	0.961074	0.978273	1.01518	1.03632	1.17259	2	2	2	2	2	2	2	2	2	Unique	4.51277	High	0	1.261e-07
FALSE	High	[K].LDTSTDSEVVDHSK.[A]	2xTMT6plex [N-Term; K14]; 2xPhospho [S4(97.4); T/S]		6.69715e-06	0	1	2	11	Q0JBZ3	Q0JBZ3 [390-403]	0	2150.97	High	High	High	High	High	High	High	High	High	T3(Phospho): 33.52; S4(Phospho): 33.52; T5(Phospho): 33.52; S7(Phospho): 99.45	1	1.17436	1.00136	1.06623	1.04753	0.976319	1.33906	1.24954	1.46453	10	10	10	10	10	10	10	10	10	Unique	4.30154	High	0	4.871e-07
FALSE	High	[R].WAGVETDDDEAR.[N]	1xTMT6plex [N-Term]; 1xPhospho [T6(100)]	A0A0P0WI02 1xPhospho [T238(100)]	1.73138e-05	0	1	1	4	A0A0P0WI02	A0A0P0WI02 [233-244]	0	1672.71	High	High	High	High	High	High	High	High	High	T6(Phospho): 100	1	0.90437	0.995637	1.01248	0.928904	0.865884	1.1364	0.947	1.11589	4	4	4	4	4	4	4	4	4	Unique	3.86267	High	0	1.862e-06
FALSE	High	[R].LLRPTDDGEAGQTASATSP.[-]	1xTMT6plex [N-Term]; 1xPhospho [S18(99.4)]	Q7XDA3 1xPhospho [S411(99.5)]	7.54266e-11	0	1	1	13	Q7XDA3	Q7XDA3 [394-412]	0	2196.04	High	High	High	High	High	High	High	High	High	S18(Phospho): 98.85	1	0.970345	0.848771	0.969478	0.886682	0.85318	1.13545	1.13237	1.16173	8	8	8	8	8	8	8	8	8	Unique	6.27155	High	0	8.346e-13
FALSE	High	[R].GEVTPPAPPSPPR.[V]	1xTMT6plex [N-Term]; 2xPhospho [T4(100); S10(100)]	Q0IZV2 2xPhospho [T351(100); S357(100)]	0.000354249	0	1	2	6	Q0IZV2	Q0IZV2 [348-360]	0	1690.78	High	High	High	High	High	High	High	High	High	T4(Phospho): 100; S10(Phospho): 100	1	0.86783	0.891687	0.868816	0.794193	0.760336	0.797374	0.751069	0.700901	6	6	6	6	6	6	6	6	6	Unique	3.73685	High	6.595e-05	0.00051
FALSE	High	[K].ELSHVNSPCDSTEEAGNLK.[A]	2xTMT6plex [N-Term; K19]; 1xCarbamidomethyl [C9]; 2xPhospho [S7(100); S/T]	Q6ZJC9 2xPhospho [S117(100); S/T]	1.92049e-07	0	1	1	2	Q6ZJC9	Q6ZJC9 [111-129]	0	2705.19	High	High	High	High	High	High	High	High	High	S7(Phospho): 100; S11(Phospho): 50; T12(Phospho): 50	1	1.13579	1.00136	1.25485	1.04653	1.01346	1.32391	1.42242	1.60326	2	2	2	2	2	2	2	2	2	Unique	5.03274	High	0	7.8e-09
FALSE	High	[R].ASEVSDNDGYEEFNDR.[A]	1xTMT6plex [N-Term]; 1xPhospho [S5(100)]	A0A0P0WB35 1xPhospho [S252(100)]	1.32517e-06	0	1	2	3	A0A0P0WB35	A0A0P0WB35 [248-263]	0	2155.87	High	High	High	High	High	High	High	High	High	S5(Phospho): 100	1	1.09621	1.07384	1.05353	0.956048	0.978273	1.41198	1.31965	1.42352	3	3	3	3	3	3	3	3	3	Unique	4.44999	High	0	7.38e-08
FALSE	High	[K].ILACAGGGSDPSAGSDGDADDHVDENK.[A]	2xTMT6plex [N-Term; K27]; 1xCarbamidomethyl [C4]; 1xPhospho [S15(100)]	A0A0P0WG85 1xPhospho [S25(100)]	4.35464e-14	0	1	1	8	A0A0P0WG85	A0A0P0WG85 [11-37]	0	3168.38	High	High	High	High	High	High	High	High	High	S15(Phospho): 100	1	1.19466	1.2579	1.24703	0.911814	0.997819	1.15723	1.07186	1.21602	8	8	8	8	8	8	8	8	8	Unique	8.40905	High	0	1.4e-16
FALSE	High	[K].VVRTINESMDELSSQSK.[S]	2xTMT6plex [N-Term; K17]; 1xOxidation [M9(100)]; 2xPhospho [T4(100); S8(100)]	Q0DG76 2xPhospho [T534(100); S538(100)]	0.000443766	0	1	1	12	Q0DG76	Q0DG76 [531-547]	1	2557.2	High	High	High	High	High	High	High	High	High	T4(Phospho): 100; S8(Phospho): 100; M9(Oxidation): 100	1	0.974405	1.01566	1.25876	1.44664	1.56758	1.28887	1.17078	1.27393	11	11	11	11	11	11	11	11	11	Unique	3.99641	High	0	6.503e-05
FALSE	High	[K].VVRTINESMDELSSQSK.[S]	2xTMT6plex [N-Term; K17]; 2xPhospho [T4(100); S8(100)]	Q0DG76 2xPhospho [T534(100); S538(100)]	1.29066e-06	0	1	1	11	Q0DG76	Q0DG76 [531-547]	1	2541.21	High	High	High	High	High	High	High	High	High	T4(Phospho): 100; S8(Phospho): 100	1	1.07489	1.20163	1.57736	1.70299	1.89302	1.32485	1.33982	1.37767	9	9	9	9	9	9	9	9	9	Unique	5.5441	High	0	7.191e-08
FALSE	High	[R].WNVGGGGGGESK.[E]	2xTMT6plex [N-Term; K12]; 1xPhospho [S11(100)]	Q5KS50 1xPhospho [S254(100)]	1.14314e-06	0	1	1	3	Q5KS50	Q5KS50 [244-255]	0	1642.8	High	High	High	High	High	High	High	High	High	S11(Phospho): 100	1	1.13884	1.13011	1.04571	0.813294	0.864907	0.749077	0.70977	0.723822	3	3	3	3	3	3	3	3	3	Unique	4.71724	High	0	1.075e-07
FALSE	High	[K].EISDDEDDDIDDSK.[G]	2xTMT6plex [N-Term; K14]; 1xPhospho [S3(100)]	A0A0P0W604 1xPhospho [S227(100)]	7.00561e-05	0	1	1	4	A0A0P0W604	A0A0P0W604 [225-238]	0	2148.91	High	High	High	High	High	High	High	High	High	S3(Phospho): 100	1	0.96324	0.922204	1.02616	1.16616	1.18546	2.57868	2.00733	3.06056	4	4	4	4	4	4	4	4	4	Unique	3.75714	High	0	7.53e-06
FALSE	High	[R].SSEESSSDEDDEILSELK.[E]	2xTMT6plex [N-Term; K18]; 1xPhospho [S6(99.6)]		5.9197e-08	0	1	1	35	Q6ZKB9	Q6ZKB9 [58-75]	0	2537.14	High	High	High	High	High	High	High	High	High	S6(Phospho): 99.64	1	1.32255	1.08433	1.15712	1.13399	1.04571	1.28129	1.29756	1.38371	12	12	12	12	12	12	12	12	12	Unique	5.56684	High	0	1.982e-09
FALSE	High	[R].SSEESSSDEDDEILSELK.[E]	2xTMT6plex [N-Term; K18]; 2xPhospho [S5(99.3); S6(99.3)]	Q6ZKB9 2xPhospho [S62(99.3); S63(99.3)]	1.66859e-05	0	1	1	4	Q6ZKB9	Q6ZKB9 [58-75]	0	2617.11	High	High	High	High	High	High	High	High	High	S5(Phospho): 99.3; S6(Phospho): 99.3	1	1.13681	1.17588	1.41415	1.16716	1.22846	1.52183	1.41474	1.25101	2	2	2	2	2	2	2	2	2	Unique	4.05123	High	0	2.622e-06
FALSE	High	[K].DIFAGSESMSPR.[R]	1xTMT6plex [N-Term]; 2xPhospho [S8(99.4); S10(100)]	Q10QF7 2xPhospho [S82(99.4); S84(100)]	0.000142687	0	1	1	2	Q10QF7	Q10QF7 [75-86]	0	1685.68	High	High	High	High	High	High	High	High	High	S8(Phospho): 100; S10(Phospho): 100	1	1.11448	0.926019	1.06721	0.919857	0.941136	0.999085	1.01903	0.985604	2	2	2	2	2	2	2	2	2	Unique	3.53708	High	0	1.727e-05
FALSE	High	[R].LTAGGSDETQEAISPK.[S]	2xTMT6plex [N-Term; K16]; 1xPhospho [S14(100)]	Q69T30 1xPhospho [S373(100)]	1.73643e-10	0	1	1	6	Q69T30	Q69T30 [360-375]	0	2142.07	High	High	High	High	High	High	High	High	High	S14(Phospho): 100	1	1.10128	1.04141	1.033	0.966101	1.01541	1.11557	1.07666	1.14002	6	6	6	6	6	6	6	6	6	Unique	6.01478	High	0	5.122e-12
FALSE	High	[K].DIAPDVDPPSPR.[V]	1xTMT6plex [N-Term]; 1xPhospho [S10(100)]	Q69XK9 1xPhospho [S118(100)]	0.00018761	0	1	1	14	Q69XK9	Q69XK9 [109-120]	0	1587.76	High	High	High	High	High	High	High	High	High	S10(Phospho): 100	1	1.12057	1.01662	1.0545	1.02944	0.95775	1.21027	1.1535	1.31253	14	14	14	14	14	14	14	14	14	Unique	3.89497	High	0	2.387e-05
FALSE	High	[K].GENVTGFDSPK.[S]	2xTMT6plex [N-Term; K11]; 1xPhospho [S9(100)]	Q10S92 1xPhospho [S1032(100)]	7.02289e-06	0	1	2	3	Q10S92	Q10S92 [1024-1034]	0	1688.83	High	High	High	High	High	High	High	High	High	S9(Phospho): 100	1	1.05459	1.12915	1.05646	0.828374	0.999774	0.813473	0.935475	0.93373	3	3	3	3	3	3	3	3	3	Unique	4.42302	High	0	5.155e-07
FALSE	High	[K].QANLTGDVIEASSR.[G]	1xTMT6plex [N-Term]; 2xPhospho [S12(100); S13(100)]	A3BXL8 2xPhospho [S805(100); S806(100)]	3.10443e-07	0	1	1	6	A3BXL8	A3BXL8 [794-807]	0	1849.83	High	High	High	High	High	High	High	High	High	S12(Phospho): 100; S13(Phospho): 100	1	1.12767	0.948907	1.12975	0.957053	1.03007	1.20553	1.13141	1.09176	6	6	6	6	6	6	6	6	6	Unique	5.04965	High	0	2.825e-08
FALSE	High	[K].QANLTGDVIEASSR.[G]	1xTMT6plex [N-Term]; 1xPhospho [S12(99.6)]	A3BXL8 1xPhospho [S805(99.6)]	6.75459e-08	0	1	1	8	A3BXL8	A3BXL8 [794-807]	0	1769.86	High	High	High	High	High	High	High	High	High	S12(Phospho): 99.63	1	1.0282	0.877382	0.968501	0.948005	0.991956	0.982986	1.14581	1.08332	4	4	4	4	4	4	4	4	4	Unique	5.33077	High	0	2.302e-09
FALSE	High	[R].ASISPSISPVHQK.[T]	2xTMT6plex [N-Term; K13]; 2xPhospho [S4(99.3); S8(100)]	A0A0P0WY39 2xPhospho [S143(99.6); S147(100)]	4.06971e-05	0	1	1	7	A0A0P0WY39	A0A0P0WY39 [140-152]	0	1969	High	High	High	High	High	High	High	High	High	S4(Phospho): 99.28; S8(Phospho): 100	1	1.08504	1.02425	1.07014	0.988218	0.99391	1.01802	0.960446	1.05195	4	4	4	4	4	4	4	4	4	Unique	4.41767	High	0	4.006e-06
FALSE	High	[R].DGDAAALDTDEEEVTR.[E]	1xTMT6plex [N-Term]; 1xPhospho [T9(100)]	Q0IZR7 1xPhospho [T489(100)]	6.20765e-08	0	1	1	10	Q0IZR7	Q0IZR7 [481-496]	0	2015.86	High	High	High	High	High	High	High	High	High	T9(Phospho): 100	1	0.86377	0.795366	0.796496	0.832395	0.801383	0.89018	0.922989	1.10503	10	10	10	10	10	10	10	10	10	Unique	5.20277	High	0	6.427e-09
FALSE	High	[K].GLDIETIQQSYTV.[-]	1xTMT6plex [N-Term]; 1xPhospho [T12(100)]	Q8L6I2 1xPhospho [T956(100)]	1.19039e-05	0	1	4	22	Q8L6I2	Q8L6I2 [945-957]	0	1775.87	High	High	High	High	High	High	High	High	High	T12(Phospho): 100	1	1.04038	1.06621	1.09457	0.993244	1.01541	1.01802	0.92491	1.17621	11	11	11	11	11	11	11	11	11	Unique	3.9555	High	0	9.533e-07
FALSE	High	[K].LAPTDASHVSTQVK.[G]	2xTMT6plex [N-Term; K14]; 2xPhospho [S7(100); S10(100)]	Q8H085 2xPhospho [S296(100); S299(100)]	0.00018178	0	1	2	2	Q8H085	Q8H085 [290-303]	0	2072.02	High	High	High	High	High	High	High	High	High	S7(Phospho): 99.99; S10(Phospho): 99.99	1	0.915535	0.863077	1.02225	1.0425	1.22357	1.07863	1.19287	1.18707	2	2	2	2	2	2	2	2	2	Unique	3.8638	High	0	2.291e-05
FALSE	High	[R].AVNPLSSSPK.[R]	2xTMT6plex [N-Term; K10]; 1xPhospho [S8(100)]	Q8LHQ6 1xPhospho [S768(100)]	0.000178933	0	1	1	9	Q8LHQ6	Q8LHQ6 [761-770]	0	1537.84	High	High	High	High	High	High	High	High	High	S8(Phospho): 100	1	0.970345	0.967027	0.90009	0.856522	0.867839	0.916696	0.900899	0.979572	5	5	5	5	5	5	5	5	5	Unique	3.58601	High	0	2.252e-05
FALSE	High	[K].AAYPDSEVQPPSPPR.[A]	1xTMT6plex [N-Term]; 1xPhospho [S12(100)]	Q6EU10 1xPhospho [S679(100)]	4.33583e-08	0	1	1	22	Q6EU10	Q6EU10 [668-682]	0	1919.91	High	High	High	High	High	High	High	High	High	S12(Phospho): 100	1	1.13782	1.04714	1.14148	1.0606	1.0115	1.12788	1.07186	1.14967	22	22	22	22	22	22	22	22	22	Unique	4.88895	High	0	8.654e-09
FALSE	High	[R].WNVGGGGGGESKESSPSR.[Q]	2xTMT6plex [N-Term; K12]; 2xPhospho [S11(98.7); S]		2.02832e-05	0	1	1	6	Q5KS50	Q5KS50 [244-261]	1	2366.06	High	High	High	High	High	High	High	High	High	S11(Phospho): 98.68; S15(Phospho): 97.38	1	1.16624	1.29986	1.16396	1.05859	0.982183	0.696045	0.638697	0.778108	4	4	4	4	4	4	4	4	4	Unique	4.29161	High	0	1.781e-06
FALSE	High	[K].AVLFAVPGAFTPTCSQK.[H]	2xTMT6plex [N-Term; K17]; 1xCarbamidomethyl [C14]; 1xPhospho [T13(99.4)]	Q7F8S5 1xPhospho [T110(100)]	1.37726e-07	0	1	1	3	Q7F8S5	Q7F8S5 [98-114]	0	2332.22	High	High	High	High	High	High	High	High	High	T13(Phospho): 100	1	1.08606	1.20545	1.35258	1.50294	1.32619	2.35045	1.6779	1.91451	3	3	3	3	3	3	3	3	3	Unique	5.38041	High	0	5.271e-09
FALSE	High	[R].VEDLWEVAEPQLSPSEK.[L]	2xTMT6plex [N-Term; K17]; 1xPhospho [S13(100)]	Q7XVC0 1xPhospho [S29(100)]	9.46861e-08	0	1	2	3	Q7XVC0	Q7XVC0 [17-33]	0	2494.25	High	High	High	High	High	High	High	High	High	S13(Phospho): 100	1	1.05155	1.06239	0.956773	0.853506	0.892271	0.906279	0.959486	0.869792	3	3	3	3	3	3	3	3	3	Unique	5.00475	High	0	3.844e-07
FALSE	High	[R].SSSDPEIEGPTDSGCDVK.[T]	2xTMT6plex [N-Term; K18]; 1xCarbamidomethyl [C15]; 1xPhospho [S1(99.2)]	Q10P54 1xPhospho [S739(99.2)]	1.28122e-08	0	1	1	12	Q10P54	Q10P54 [739-756]	0	2418.08	High	High	High	High	High	High	High	High	High	S1(Phospho): 99.15	1	1.22207	1.09291	0.959705	0.774087	0.792587	1.11462	1.2457	1.44161	4	4	4	4	4	4	4	4	4	Unique	5.75944	High	0	4.251e-10
FALSE	High	[K].EESDDDMGFSLFD.[-]	1xTMT6plex [N-Term]; 1xPhospho [S3(100)]	A0A0P0WMY2 1xPhospho [S129(100)]; Q69UI8 1xPhospho [S100(100)]	5.61404e-05	0	2	5	9	A0A0P0WMY2; Q69UI8	A0A0P0WMY2 [127-139]; Q69UI8 [98-110]	0	1815.69	High	High	High	High	High	High	High	High	High	S3(Phospho): 100	1	1.05967	0.911714	1.00368	0.573025	0.71929	0.737713	0.672312	0.786553	9	9	9	9	9	9	9	9	9	Not Unique	4.01396	High	0	5.84e-06
FALSE	High	[R].GGSQGSSSGLIVK.[K]	2xTMT6plex [N-Term; K13]; 1xPhospho [S3(100)]	B7FAH5 1xPhospho [S126(100)]	2.98126e-05	0	1	1	4	B7FAH5	B7FAH5 [124-136]	0	1714.91	High	High	High	High	High	High	High	High	High	S3(Phospho): 100	1	0.9267	0.811578	0.764246	0.818321	0.684107	0.745289	0.915305	0.951825	4	4	4	4	4	4	4	4	4	Unique	4.32103	High	0	2.786e-06
FALSE	High	[K].EESDDDMGFSLFD.[-]	1xTMT6plex [N-Term]; 1xOxidation [M7(100)]; 1xPhospho [S3(100)]	A0A0P0WMY2 1xPhospho [S129(100)]; Q69UI8 1xPhospho [S100(100)]	0.000552781	0	2	5	6	A0A0P0WMY2; Q69UI8	A0A0P0WMY2 [127-139]; Q69UI8 [98-110]	0	1831.68	High	High	High	High	High	High	High	High	High	S3(Phospho): 100; M7(Oxidation): 100	1	1.05865	0.88215	0.956773	0.645408	0.748609	1.00193	0.830786	1.04834	6	6	6	6	6	6	6	6	6	Not Unique	3.73472	High	0	8.405e-05
FALSE	High	[K].SAPQSIWYGPDRPK.[Y]	2xTMT6plex [N-Term; K14]; 1xPhospho [S1(100)]	Q10HD0 1xPhospho [S41(100)]	1.54433e-06	0	1	1	5	Q10HD0	Q10HD0 [41-54]	0	2140.1	High	High	High	High	High	High	High	High	High	S1(Phospho): 100	1	0.976435	0.979425	1.19914	1.20637	1.30664	1.2169	1.31581	1.23653	5	5	5	5	5	5	5	5	5	Unique	5.07483	High	0	8.847e-08
FALSE	High	[K].QASCSNSSAGDNNHR.[R]	1xTMT6plex [N-Term]; 1xCarbamidomethyl [C4]; 1xPhospho [S7(99.4)]		0.000934961	0	1	2	5	Q0J7W9	Q0J7W9 [572-586]	0	1913.78	High	High	High	High	High	High	High	High	High	S7(Phospho): 99.43	1	1.3053	1.49822	1.97805	1.12494	0.953841	0.857035	0.73186	1.06281	2	2	2	2	2	2	2	2	2	Unique	2.57352	High	0	0.0003257
FALSE	High	[K].DHGQDSEDDERR.[K]	1xTMT6plex [N-Term]; 1xPhospho [S6(100)]	Q6ZKL9 1xPhospho [S240(100)]	0.000177994	0	1	1	3	Q6ZKL9	Q6ZKL9 [235-246]	1	1767.71	High	High	High	High	High	High	High	High	High	S6(Phospho): 100	1	0.651633	1.03474	1.12389	1.38531	1.1796	1.26235	1.17943	1.23532	3	3	3	3	3	3	3	3	3	Unique	2.81223	High	0	2.244e-05
FALSE	High	[R].AASPDADNVFSR.[F]	1xTMT6plex [N-Term]; 1xPhospho [S3(100)]	Q6Z3R6 1xPhospho [S53(100)]	8.41714e-07	0	1	1	6	Q6Z3R6	Q6Z3R6 [51-62]	0	1558.71	High	High	High	High	High	High	High	High	High	S3(Phospho): 100	1	0.90843	1.11008	0.883476	0.876628	0.837543	0.782222	0.886492	0.915634	6	6	6	6	6	6	6	6	6	Unique	3.94629	High	0	1.965e-05
FALSE	High	[R].SFDELSDDEGLYEDSD.[-]	1xTMT6plex [N-Term]; 1xPhospho [S6(100)]	Q6ZIQ1 1xPhospho [S427(100)]	9.04734e-06	0	1	2	10	Q6ZIQ1	Q6ZIQ1 [422-437]	0	2144.83	High	High	High	High	High	High	High	High	High	S6(Phospho): 100	1	1.15	1.00613	1.02323	1.06563	1.02323	1.37599	1.26011	1.35717	10	10	10	10	10	10	10	10	10	Unique	3.94794	High	0	3.025e-05
FALSE	High	[R].RFSDASVQSDIK.[LM]	2xTMT6plex [N-Term; K12]; 1xPhospho [S3(100)]	Q53NM9 1xPhospho [S82(100)]	0.0014408	0	1	2	2	Q53NM9	Q53NM9 [80-91]	1	1890.97	High	High	High	High	High	High	High	High	High	S3(Phospho): 100	1	1.16929	1.00231	1.20794	1.01637	1.00662	1.42713	1.26107	1.32821	2	2	2	2	2	2	2	2	2	Unique	2.95105	High	0	0.0002606
FALSE	High	[R].GESHEDDQEEGSGSGEGR.[R]	1xTMT6plex [N-Term]; 1xPhospho [S12(100)]	Q69UI3 1xPhospho [S120(99.2)]	6.01417e-08	0	1	1	5	Q69UI3	Q69UI3 [109-126]	0	2170.84	High	High	High	High	High	High	High	High	High	S12(Phospho): 99.52	1	1.12564	0.838281	1.11509	0.905782	0.845361	1.16007	0.905701	0.981985	4	4	4	4	4	4	4	4	4	Unique	4.53254	High	0	4.11e-09
FALSE	High	[K].MEGPSSNEDSAAASK.[E]	2xTMT6plex [N-Term; K15]; 2xPhospho [S5(100); S6(100)]	Q2QQ93 2xPhospho [S517(100); S518(100)]	0.000233979	0	1	1	2	Q2QQ93	Q2QQ93 [513-527]	0	2098.88	High	High	High	High	High	High	High	High	High	S5(Phospho): 100; S6(Phospho): 100	1	1.08301	0.922204	0.947	0.898745	0.951886	1.23773	1.117	1.03265	2	2	2	2	2	2	2	2	2	Unique	3.16711	High	0	3.076e-05
FALSE	High	[R].AMNKPAEYDSDDEIIATSR.[S]	2xTMT6plex [N-Term; K4]; 1xOxidation [M2(100)]; 1xPhospho [S10(100)]	Q6YS19 1xPhospho [S199(100)]	2.2146e-07	0	1	1	4	Q6YS19	Q6YS19 [190-208]	0	2680.26	High	High	High	High	High	High	High	High	High	M2(Oxidation): 100; S10(Phospho): 100	1	1.02617	1.06812	1.31935	1.2124	1.28514	1.37126	1.40321	1.36199	4	4	4	4	4	4	4	4	4	Unique	4.71454	High	0	9.178e-09
FALSE	High	[K].SFSGPTSPPSGSVK.[E]	2xTMT6plex [N-Term; K14]; 1xPhospho [S1(100)]	Q0E3V2 1xPhospho [S78(100)]	1.80602e-05	0	1	1	18	Q0E3V2	Q0E3V2 [78-91]	0	1872.95	High	High	High	High	High	High	High	High	High	S1(Phospho): 100	1	0.89016	0.72384	0.697789	0.778108	0.718313	0.717826	0.801012	0.790172	17	17	17	17	17	17	17	17	17	Unique	4.32163	High	0	1.557e-06
FALSE	High	[R].DQLEGGGGAHGPEVVADEEVTSHRFTPAR.[M]	1xTMT6plex [N-Term]; 2xPhospho [T21(98.7); S/T]	A3C592 2xPhospho [T232(98.7); S/T]	7.8015e-09	0	1	1	6	A3C592	A3C592 [212-240]	1	3407.53	High	High	High	High	High	High	High	High	High	T21(Phospho): 98.72; T26(Phospho): 100	1	1.16929	1.16635	1.33499	1.22547	1.16103	1.25951	1.25146	1.4211	5	5	5	5	5	5	5	5	5	Unique	6.47485	High	0	1.858e-10
FALSE	High	[R].DVSEQFDEFPLAYNK.[D]	2xTMT6plex [N-Term; K15]; 1xPhospho [S3(100)]	Q7XUF9 1xPhospho [S604(100)]	8.29825e-08	0	1	1	5	Q7XUF9	Q7XUF9 [602-616]	0	2340.12	High	High	High	High	High	High	High	High	High	S3(Phospho): 100	1	1.00181	0.984193	1.00759	0.876628	0.954818	1.29266	1.27931	1.45006	5	5	5	5	5	5	5	5	5	Unique	5.59281	High	0	2.929e-09
FALSE	High	[R].KTSPGSSPASVAAAPGGLDAVR.[T]	2xTMT6plex [N-Term; K1]; 2xPhospho [S3(99.3); S/T]	Q6EU10 2xPhospho [S103(99.4); S106(99.4)]	4.48249e-09	0	1	1	6	Q6EU10	Q6EU10 [101-122]	1	2614.3	High	High	High	High	High	High	High	High	High	S3(Phospho): 99.42; S6(Phospho): 99.42	1	1.11854	0.959398	1.11412	0.982186	1.01932	1.17523	1.13909	1.14484	5	5	5	5	5	5	5	5	5	Unique	6.014	High	0	9.776e-11
FALSE	High	[R].SASHTSLSESDDFDLSR.[L]	1xTMT6plex [N-Term]; 2xPhospho [T5(99.1); S]	Q69T31 2xPhospho [S15(99.1); S/T]	6.07798e-08	0	1	1	5	Q69T31	Q69T31 [13-29]	0	2242.91	High	High	High	High	High	High	High	High	High	S1(Phospho): 50; S3(Phospho): 50; S6(Phospho): 100	1	1.18147	0.938417	1.03398	0.936947	0.837543	1.14398	1.23609	1.28358	5	5	5	5	5	5	5	5	5	Unique	5.39629	High	0	2.038e-09
FALSE	High	[K].DLQQEISDGEVEIPSA.[-]	1xTMT6plex [N-Term]; 1xPhospho [S7(100)]	Q0JAI2 1xPhospho [S157(100)]	2.68273e-05	0	1	2	8	Q0JAI2	Q0JAI2 [151-166]	0	2038.94	High	High	High	High	High	High	High	High	High	S7(Phospho): 100	1	1.04038	1.05477	1.03691	1.08774	1.05743	1.25288	1.17463	1.31374	8	8	8	8	8	8	8	8	8	Unique	4.33695	High	0	2.46e-06
FALSE	High	[R].SVTAQSNLNSFSDDEDTR.[E]	1xTMT6plex [N-Term]; 1xPhospho [S12(100)]	Q7XQR9 1xPhospho [S539(100)]	1.41635e-08	0	1	1	2	Q7XQR9	Q7XQR9 [528-545]	0	2295	High	High	High	High	High	High	High	High	High	S12(Phospho): 100	1	1.07895	0.97561	0.990978	0.819326	1.02225	1.25099	1.19768	1.34148	2	2	2	2	2	2	2	2	2	Unique	5.11251	High	0	3.739e-10
FALSE	High	[K].ESQEPADGTEETASAEPDEDTTSVDVK.[E]	2xTMT6plex [N-Term; K27]; 1xPhospho [S14(99.3)]		4.93709e-10	0	1	1	18	Q5VRC9	Q5VRC9 [252-278]	0	3375.49	High	High	High	High	High	High	High	High	High	S14(Phospho): 99.31	1	1.19771	1.03092	1.22651	1.04552	1.02909	1.31349	1.23705	1.40421	6	6	6	6	6	6	6	6	6	Unique	4.87238	High	0	7.448e-12
FALSE	High	[R].VFGAENDQQCETHYDSDEAESK.[L]	2xTMT6plex [N-Term; K22]; 1xCarbamidomethyl [C10]; 1xPhospho [S16(100)]	Q75I97 1xPhospho [S228(100)]	8.34216e-08	0	1	2	3	Q75I97	Q75I97 [213-234]	0	3097.31	High	High	High	High	High	High	High	High	High	S16(Phospho): 99.99	1	0.966285	1.14155	0.980228	1.21642	1.04278	1.20837	1.14389	1.14605	3	3	3	3	3	3	3	3	3	Unique	4.88389	High	0	2.953e-09
FALSE	High	[R].NLSQEPQSASSAEDLK.[V]	2xTMT6plex [N-Term; K16]; 1xPhospho [S11(99.6)]	B9FXV5 1xPhospho [S654(99.3)]	3.9929e-06	0	1	2	7	B9FXV5	B9FXV5 [644-659]	0	2242.1	High	High	High	High	High	High	High	High	High	S11(Phospho): 99.48	1	1.17233	1.22547	1.33205	1.12494	1.20794	1.50668	1.48581	1.55742	5	5	5	5	5	5	5	5	5	Unique	3.67511	High	0	2.676e-07
FALSE	High	[R].DPSPEPQQQPYDDLEDDLGDDWNR.[G]	1xTMT6plex [N-Term]; 1xPhospho [S3(100)]	Q5ZDL8 1xPhospho [S23(100)]	1.18315e-11	0	1	2	5	Q5ZDL8	Q5ZDL8 [21-44]	0	3153.32	High	High	High	High	High	High	High	High	High	S3(Phospho): 100	1	0.935835	0.842096	1.01834	0.843453	0.830702	1.23489	1.09971	1.25101	5	5	5	5	5	5	5	5	5	Unique	6.57022	High	0	9.627e-14
FALSE	High	[K].SWADYSDGEAEAVEVAS.[-]	1xTMT6plex [N-Term]; 1xPhospho [S6(100)]	Q0E2A9 1xPhospho [S634(100)]	0.000607254	0	1	2	7	Q0E2A9	Q0E2A9 [629-645]	0	2094.87	High	High	High	High	High	High	High	High	High	S6(Phospho): 100	1	1.12158	0.980379	1.03105	0.989223	0.907908	1.10988	1.0248	1.16173	6	6	6	6	6	6	6	6	6	Unique	3.64591	High	0	9.433e-05
FALSE	High	[K].VEEKEESDDDMGFSLFD.[-]	2xTMT6plex [N-Term; K4]; 1xPhospho [S7(100)]	A0A0P0WMY2 1xPhospho [S129(100)]	0.00096445	0	1	4	7	A0A0P0WMY2	A0A0P0WMY2 [123-139]	1	2530.1	High	High	High	High	High	High	High	High	High	S7(Phospho): 100	1	1.09113	1.0109	1.04864	0.943984	0.905954	0.92806	0.86152	0.988017	7	7	7	7	7	7	7	7	7	Unique	3.57046	High	0	0.0001621
FALSE	High	[K].SESDVTSLAPSSPPRSPK.[R]	2xTMT6plex [N-Term; K18]; 3xPhospho [S1(100); S16(100); S/T]	Q5WA73 3xPhospho [S6(100); S21(100); S/T]	0.00108055	0	1	1	8	Q5WA73	Q5WA73 [6-23]	1	2540.15	High	High	High	High	High	High	High	High	High	S1(Phospho): 100; S12(Phospho): 98.47; S16(Phospho): 98.47	1	0.9876	1.1034	0.578559	0.471489	0.476921	0.461189	0.468698	0.547692	8	8	8	8	8	8	8	8	8	Unique	4.09733	High	0	0.0001852
FALSE	High	[K].SESDVTSLAPSSPPRSPK.[R]	2xTMT6plex [N-Term; K18]; 2xPhospho [S16(100); S/T]	Q5WA73 2xPhospho [S21(100); S/T]	2.22632e-07	0	1	1	23	Q5WA73	Q5WA73 [6-23]	1	2460.18	High	High	High	High	High	High	High	High	High	S12(Phospho): 99.12; S16(Phospho): 100	1	1.09316	1.39141	0.640129	0.573025	0.546309	0.465924	0.438924	0.519945	23	23	23	23	23	23	23	23	23	Unique	5.51162	High	0	9.27e-09
FALSE	High	[R].TQESDGDDEDEFEDDDQDSK.[M]	2xTMT6plex [N-Term; K20]; 1xPhospho [S4(100)]	Q2QN76 1xPhospho [S587(100)]	4.19396e-07	0	1	2	2	Q2QN76	Q2QN76 [584-603]	0	2857.11	High	High	High	High	High	High	High	High	High	S4(Phospho): 100	1	1.03328	0.949861	0.876635	0.930915	0.860998	1.22163	1.18231	1.2691	2	2	2	2	2	2	2	2	2	Unique	4.55519	High	0	1.936e-08
FALSE	High	[K].VEEKEESDDDMGFSLFD.[-]	2xTMT6plex [N-Term; K4]; 1xOxidation [M11(100)]; 1xPhospho [S7(100)]	A0A0P0WMY2 1xPhospho [S129(100)]	1.50942e-05	0	1	4	18	A0A0P0WMY2	A0A0P0WMY2 [123-139]	1	2546.09	High	High	High	High	High	High	High	High	High	S7(Phospho): 100; M11(Oxidation): 100	1	1.0891	0.954629	1.07698	1.02944	0.928431	1.01234	0.952763	1.01938	18	18	18	18	18	18	18	18	18	Unique	4.50293	High	0	1.261e-06
FALSE	High	[K].GLDIDTIQQNYTV.[-]	1xTMT6plex [N-Term]; 1xPhospho [T12(100)]	Q7XPY2 1xPhospho [T950(100)]	3.82783e-06	0	1	3	24	Q7XPY2	Q7XPY2 [939-951]	0	1788.86	High	High	High	High	High	High	High	High	High	T12(Phospho): 100	1	0.992675	0.903131	0.951886	0.937952	0.956773	1.14871	1.15061	1.18827	22	22	22	22	22	22	22	22	22	Unique	4.15463	High	0	2.151e-06
FALSE	High	[K].TPSDEAAASEAQASLENLLSR.[A]	1xTMT6plex [N-Term]; 1xPhospho [S20(100)]	A0A0P0WKD6 1xPhospho [S403(100)]	2.25248e-11	0	1	2	4	A0A0P0WKD6	A0A0P0WKD6 [384-404]	0	2469.17	High	High	High	High	High	High	High	High	High	S20(Phospho): 100	1	1.19466	1.05381	0.968501	0.959064	0.988046	0.995297	1.06321	0.93373	4	4	4	4	4	4	4	4	4	Unique	7.09923	High	0	2.042e-13
FALSE	High	[R].AASYANDISEAESPR.[T]	1xTMT6plex [N-Term]; 1xPhospho [S13(100)]	Q654U5 1xPhospho [S844(100)]	6.62684e-06	0	1	1	4	Q654U5	Q654U5 [832-846]	0	1889.85	High	High	High	High	High	High	High	High	High	S13(Phospho): 100	1	1.09519	0.952722	1.04082	0.984196	0.876635	0.888286	1.00655	0.918047	4	4	4	4	4	4	4	4	4	Unique	4.53402	High	0	4.819e-07
FALSE	High	[R].SIPYSTSEEAK.[A]	2xTMT6plex [N-Term; K11]; 1xPhospho [T6(98.8)]	Q6H7U2 1xPhospho [T282(98.8)]	0.0006954	0	1	1	4	Q6H7U2	Q6H7U2 [277-287]	0	1749.87	High	High	High	High	High	High	High	High	High	S7(Phospho): 98.95	1	1.10737	1.04523	1.16787	0.949011	0.884453	0.95647	0.938356	1.02421	3	3	3	3	3	3	3	3	3	Unique	2.94838	High	0	0.0001107
FALSE	High	[R].NDKDDVFSDSEAEDGSSK.[G]	3xTMT6plex [N-Term; K3; K18]; 2xPhospho [S8(100); S10(100)]	Q2QT46 2xPhospho [S543(100); S545(100)]	8.59269e-10	0	1	2	28	Q2QT46	Q2QT46 [536-553]	1	2792.22	High	High	High	High	High	High	High	High	High	S8(Phospho): 100; S10(Phospho): 100	1	0.986585	1.04809	0.969478	0.921867	0.970455	1.2775	1.19768	1.31374	28	28	28	28	28	28	28	28	28	Unique	5.6568	High	0	4.671e-11
FALSE	High	[R].NDKDDVFSDSEAEDGSSK.[G]	3xTMT6plex [N-Term; K3; K18]; 1xPhospho [S8(100)]	Q2QT46 1xPhospho [S543(100)]	3.74621e-09	0	1	2	13	Q2QT46	Q2QT46 [536-553]	1	2712.25	High	High	High	High	High	High	High	High	High	S8(Phospho): 100	1	0.98354	1.06812	0.905954	0.804246	0.902044	0.91859	0.941237	1.01094	12	12	12	12	12	12	12	12	12	Unique	5.3838	High	0	7.925e-11
FALSE	High	[R].KVSGPLDSAASK.[K]	3xTMT6plex [N-Term; K1; K12]; 2xPhospho [S3(100); S11(98.9)]	Q7X8W5 2xPhospho [S177(100); S185(98.9)]	0.00106945	0	1	1	6	Q7X8W5	Q7X8W5 [175-186]	1	2007.05	High	High	High	High	High	High	High	High	High	S3(Phospho): 100; S11(Phospho): 100	1	1.24034	0.949861	0.737859	0.459426	0.495489	0.337132	0.326552	0.29918	6	6	6	6	6	6	6	6	6	Unique	3.66714	High	0	0.0003264
FALSE	High	[K].DLIPQSGSPPR.[R]	1xTMT6plex [N-Term]; 1xPhospho [S8(100)]	Q0IMW0 1xPhospho [S172(99.7)]	0.00158761	0	1	2	8	Q0IMW0	Q0IMW0 [165-175]	0	1475.75	High	High	High	High	High	High	High	High	High	S8(Phospho): 99.45	1	1.10433	1.02711	1.06916	0.934936	0.998797	1.15818	1.11796	1.21119	8	8	8	8	8	8	8	8	8	Unique	3.35352	High	0	0.0003563
FALSE	High	[K].LASENSVSFSR.[K]	1xTMT6plex [N-Term]; 1xPhospho [S8(100)]	Q10M67 1xPhospho [S299(100)]	0.000129782	0	1	1	2	Q10M67	Q10M67 [292-302]	0	1505.72	High	High	High	High	High	High	High	High	High	S8(Phospho): 100	1	1.02617	0.982286	0.978273	0.837421	0.883476	1.01802	1.14005	1.09297	2	2	2	2	2	2	2	2	2	Unique	3.18413	High	0	1.552e-05
FALSE	High	[K].SSLDADDDYEAESPK.[E]	2xTMT6plex [N-Term; K15]; 1xPhospho [S/Y]	Q762B4 1xPhospho [S456(100)]	3.92219e-05	0	1	2	2	Q762B4	Q762B4 [444-458]	0	2179.97	High	High	High	High	High	High	High	High	High	S13(Phospho): 100	1	1.13478	0.984193	1.20501	1.07367	1.15712	1.22636	1.23609	1.15932	2	2	2	2	2	2	2	2	2	Unique	3.34805	High	0	3.826e-06
FALSE	High	[R].YPTESPENGNIDGK.[D]	2xTMT6plex [N-Term; K14]; 1xPhospho [S5(100)]	Q5QMV0 1xPhospho [S374(100)]	4.39078e-06	0	1	1	11	Q5QMV0	Q5QMV0 [370-383]	0	2058.98	High	High	High	High	High	High	High	High	High	S5(Phospho): 99.64	1	1.13275	1.02234	1.02225	0.955042	0.953841	1.05875	1.08338	1.16173	10	10	10	10	10	10	10	10	10	Unique	4.77548	High	0	2.98e-07
FALSE	High	[R].LLAANNPGSQK.[N]	2xTMT6plex [N-Term; K11]; 1xPhospho [S9(100)]	Q7XDP6 1xPhospho [S214(100)]	0.000418927	0	1	2	1	Q7XDP6	Q7XDP6 [206-216]	0	1650.9	High	High	High	High	High	High	High	High	High	S9(Phospho): 100	1	0.85971	0.813485	0.907908	0.701705	0.626447	0.850406	0.670391	0.905983	1	1	1	1	1	1	1	1	1	Unique	3.15008	High	0	6.093e-05
FALSE	High	[R].KTSPGSSPASVAAAPGGLDAVR.[T]	2xTMT6plex [N-Term; K1]; 1xPhospho [S/T]		8.44418e-09	0	1	1	6	Q6EU10	Q6EU10 [101-122]	1	2534.34	High	High	High	High	High	High	High	High	High	S3(Phospho): 99.45	1	1.07794	1.06526	1.13269	0.933931	0.821906	1.35137	1.23898	1.31132	3	3	3	3	3	3	3	3	3	Unique	5.37522	High	0	2.047e-10
FALSE	High	[R].DNLQGSAFLGSSR.[D]	1xTMT6plex [N-Term]; 1xPhospho [S11(99.6)]	Q0D8I9 1xPhospho [S750(99.6)]	2.42685e-05	0	1	2	4	Q0D8I9	Q0D8I9 [740-752]	0	1660.79	High	High	High	High	High	High	High	High	High	S11(Phospho): 99.63	1	1.1632	1.00136	1.16787	0.917846	1.11607	0.893968	0.951802	1.00491	2	2	2	2	2	2	2	2	2	Unique	3.75349	High	0	2.193e-06
FALSE	High	[R].SLSILGLAQGGGGGGDR.[L]	1xTMT6plex [N-Term]; 1xPhospho [S3(100)]	Q9FWC4 1xPhospho [S126(100)]	0.000808603	0	1	1	2	Q9FWC4	Q9FWC4 [124-140]	0	1823.92	High	High	High	High	High	High	High	High	High	S3(Phospho): 100	1	1.05053	0.71621	0.725154	0.710753	0.690948	0.834307	0.856718	0.858935	2	2	2	2	2	2	2	2	2	Unique	3.38225	High	0	0.0001316
FALSE	High	[R].FLDGELDPQVGSPQNK.[T]	2xTMT6plex [N-Term; K16]; 1xPhospho [S12(100)]	Q688J5 1xPhospho [S125(100)]	3.41379e-07	0	1	1	4	Q688J5	Q688J5 [114-129]	0	2282.15	High	High	High	High	High	High	High	High	High	S12(Phospho): 100	1	1.10433	0.924112	0.970455	1.02139	0.950909	1.22921	1.36383	1.41748	4	4	4	4	4	4	4	4	4	Unique	4.79006	High	0	1.524e-08
FALSE	High	[R].DDGQMADEAADIESQQDSK.[M]	2xTMT6plex [N-Term; K19]; 1xPhospho [S14(100)]	C7J464 1xPhospho [S55(100)]	2.46557e-05	0	1	1	3	C7J464	C7J464 [42-60]	0	2591.12	High	High	High	High	High	High	High	High	High	S14(Phospho): 100	1	0.931775	1.00804	1.00564	1.05256	1.04668	1.4527	1.45604	1.56828	3	3	3	3	3	3	3	3	3	Unique	3.50184	High	0	2.237e-06
FALSE	High	[R].LASINVENVEPNR.[Q]	1xTMT6plex [N-Term]; 1xPhospho [S3(100)]	Q69V57 1xPhospho [S42(100)]	8.97507e-05	0	1	1	7	Q69V57	Q69V57 [40-52]	0	1763.89	High	High	High	High	High	High	High	High	High	S3(Phospho): 100	1	1.03023	0.988962	0.934295	1.03346	0.905954	1.11272	1.01135	1.21964	7	7	7	7	7	7	7	7	7	Unique	3.98098	High	0	1.009e-05
FALSE	High	[K].SELISSSASPRNSPGNEEGCEGDNIGK.[L]	2xTMT6plex [N-Term; K27]; 1xCarbamidomethyl [C20]; 2xPhospho [S13(96.2); S]	A0A0P0VPQ7 2xPhospho [S55(96.2); S]	0.00151635	0	1	1	2	A0A0P0VPQ7	A0A0P0VPQ7 [43-69]	1	3409.5	High	High	High	High	High	High	High	High	High	S5(Phospho): 25.01; S6(Phospho): 25.01; S7(Phospho): 25.01; S9(Phospho): 25.01; S13(Phospho): 99.95	1	0.933805	0.820161	0.90009	1.07467	0.870771	1.12693	0.961407	1.01818	2	2	2	2	2	2	2	2	2	Unique	2.79771	High	0	0.0002764
FALSE	High	[K].VTSTIATDDDDGTLGGSK.[R]	2xTMT6plex [N-Term; K18]; 1xPhospho [T7(100)]	Q6K8A9 1xPhospho [T401(100)]	1.64239e-05	0	1	2	3	Q6K8A9	Q6K8A9 [395-412]	0	2291.11	High	High	High	High	High	High	High	High	High	T7(Phospho): 100	1	1.06373	0.913621	0.985115	0.92991	0.858066	1.07958	1.09011	1.10503	3	3	3	3	3	3	3	3	3	Unique	3.70564	High	0	1.389e-06
FALSE	High	[R].YVGSSSPVHLEDQK.[G]	2xTMT6plex [N-Term; K14]; 2xPhospho [S4(99.6); S/Y]	A0A0N7KCJ7 2xPhospho [S111(99.6); S/Y]	0.000663548	0	1	1	4	A0A0N7KCJ7	A0A0N7KCJ7 [108-121]	0	2164.01	High	High	High	High	High	High	High	High	High	S4(Phospho): 99.65; S5(Phospho): 50.17; S6(Phospho): 50.17	1	1.13173	0.903131	0.86393	1.02944	1.02714	1.14871	1.38784	1.37285	2	2	2	2	2	2	2	2	2	Unique	3.46948	High	0	0.0001042
FALSE	High	[R].DVLPSPSSNQNNSSLPFVR.[H]	1xTMT6plex [N-Term]; 1xPhospho [S5(100)]	Q2QTN6 1xPhospho [S189(100)]	1.1288e-08	0	1	1	7	Q2QTN6	Q2QTN6 [185-203]	0	2367.15	High	High	High	High	High	High	High	High	High	S5(Phospho): 100	1	1.082	1.01185	1.06916	1.08473	0.988046	1.2633	1.28124	1.19672	7	7	7	7	7	7	7	7	7	Unique	5.66207	High	0	2.86e-10
FALSE	High	[K].ALSAAGSFGK.[K]	2xTMT6plex [N-Term; K10]; 1xPhospho [S7(100)]	Q9AS33 1xPhospho [S103(100)]	0.000305854	0	1	1	8	Q9AS33	Q9AS33 [97-106]	0	1446.78	High	High	High	High	High	High	High	High	High	S7(Phospho): 100	1	1.15	0.875474	1.10044	1.0606	0.994888	0.938477	1.10163	0.838427	8	8	8	8	8	8	8	8	8	Unique	3.60557	High	0	0.0001059
FALSE	High	[K].DGSLQLTTTQ.[-]	1xTMT6plex [N-Term]; 1xPhospho [S3(100)]	Q84SL0 1xPhospho [S543(100)]	0.000284182	0	1	2	6	Q84SL0	Q84SL0 [541-550]	0	1372.66	High	High	High	High	High	High	High	High	High	S3(Phospho): 100	1	0.86986	0.768663	0.639152	0.641386	0.65772	0.706462	0.678075	0.794997	6	6	6	6	6	6	6	6	6	Unique	3.16439	High	0	3.866e-05
FALSE	High	[R].SVIIEDSPPSPASNGDK.[E]	2xTMT6plex [N-Term; K17]; 2xPhospho [S10(100); S13(100)]	Q10RS7 2xPhospho [S336(100); S339(100)]	8.78011e-07	0	1	2	1	Q10RS7	Q10RS7 [327-343]	0	2331.09	High	High	High	High	High	High	High	High	High	S10(Phospho): 100; S13(Phospho): 100	1	1.03125	0.852586	1.01248	0.989223	0.811156	0.998138	1.06129	1.31977	1	1	1	1	1	1	1	1	1	Unique	4.5241	High	0	4.58e-08
FALSE	High	[R].SVIIEDSPPSPASNGDK.[E]	2xTMT6plex [N-Term; K17]; 1xPhospho [S10(100)]	Q10RS7 1xPhospho [S336(100)]	4.14316e-06	0	1	2	5	Q10RS7	Q10RS7 [327-343]	0	2251.13	High	High	High	High	High	High	High	High	High	S10(Phospho): 100	1	0.990645	0.935556	1.06134	0.949011	0.884453	1.01802	1.05265	1.0037	4	4	4	4	4	4	4	4	4	Unique	3.83922	High	0	2.794e-07
FALSE	High	[R].GGDMEGTGSNGEDMQMVDDAR.[L]	1xTMT6plex [N-Term]; 1xPhospho [S9(99.4)]	Q6AT26 1xPhospho [S242(99.3)]	1.91395e-05	0	1	2	4	Q6AT26	Q6AT26 [234-254]	0	2480.96	High	High	High	High	High	High	High	High	High	S9(Phospho): 99.32	1	0.779524	0.702859	0.559991	0.648424	0.664561	0.906279	0.869204	1.12192	2	2	2	2	2	2	2	2	2	Unique	3.34552	High	0	1.662e-06
FALSE	High	[R].KQSPEEVSGPESGQCEAEADGEDNMK.[N]	3xTMT6plex [N-Term; K1; K26]; 1xCarbamidomethyl [C15]; 3xPhospho [S3(100); S8(100); S12(100)]	Q10SU9 3xPhospho [S605(100); S610(100); S614(100)]	1.27491e-05	0	1	1	3	Q10SU9	Q10SU9 [603-628]	1	3735.54	High	High	High	High	High	High	High	High	High	S3(Phospho): 100; S8(Phospho): 100; S12(Phospho): 100	1	1.16015	1.06144	1.02127	1.08774	1.03105	1.47921	1.23129	1.47056	3	3	3	3	3	3	3	3	3	Unique	4.09526	High	0	1.036e-06
FALSE	High	[R].KQSPEEVSGPESGQCEAEADGEDNMK.[N]	3xTMT6plex [N-Term; K1; K26]; 1xCarbamidomethyl [C15]; 2xPhospho [S3(100); S8(100)]	Q10SU9 2xPhospho [S605(100); S610(100)]	4.33583e-08	0	1	1	3	Q10SU9	Q10SU9 [603-628]	1	3655.58	High	High	High	High	High	High	High	High	High	S3(Phospho): 100; S8(Phospho): 100	1	1.15711	1.26171	1.2011	1.15108	1.29003	1.68282	1.54632	2.04842	3	3	3	3	3	3	3	3	3	Unique	6.06001	High	0	5.45e-09
FALSE	High	[R].AASYANDISEAESPRTPNRPGEDWR.[S]	1xTMT6plex [N-Term]; 2xPhospho [S9(99.2); S/T/Y]	Q654U5 2xPhospho [S840(100); S/T/Y]	7.9387e-10	0	1	1	8	Q654U5	Q654U5 [832-856]	1	3178.38	High	High	High	High	High	High	High	High	High	S13(Phospho): 99.04; T16(Phospho): 99.99	1	1.1297	1.10054	0.976319	0.933931	1.07014	1.3883	1.36768	1.36199	6	6	6	6	6	6	6	6	6	Unique	6.64899	High	0	1.298e-11
FALSE	High	[R].LITDASVSSPVSR.[E]	1xTMT6plex [N-Term]; 1xPhospho [S9(99.5)]	Q0JD86 1xPhospho [S205(100)]	6.17297e-05	0	1	1	6	Q0JD86	Q0JD86 [197-209]	0	1640.85	High	High	High	High	High	High	High	High	High	S9(Phospho): 99.47	1	1.35402	1.19209	1.51872	1.23251	1.50015	1.5957	1.49349	1.29202	4	4	4	4	4	4	4	4	4	Unique	4.03648	High	0	6.5e-06
FALSE	High	[R].SVLAVVEDAK.[E]	2xTMT6plex [N-Term; K10]; 1xPhospho [S1(100)]	A0A0P0VNU0 1xPhospho [S118(100)]	6.57614e-05	0	1	1	4	A0A0P0VNU0	A0A0P0VNU0 [118-127]	0	1568.87	High	High	High	High	High	High	High	High	High	S1(Phospho): 100	1	0.97948	0.784875	0.952864	0.795199	0.774996	0.64396	0.757792	0.573025	4	4	4	4	4	4	4	4	4	Unique	3.81226	High	0	1.501e-05
FALSE	High	[R].DTGLFNESGNDDNESGYK.[N]	2xTMT6plex [N-Term; K18]; 1xPhospho [S8(100)]	A0A0P0WAD7 1xPhospho [S54(100)]	4.85176e-09	0	1	1	21	A0A0P0WAD7	A0A0P0WAD7 [40-57]	0	2500.09	High	High	High	High	High	High	High	High	High	S8(Phospho): 100	1	1.09215	1.13869	1.26658	1.29584	1.16494	1.97355	1.85846	1.91451	21	21	21	21	21	21	21	21	21	Unique	6.18011	High	0	1.071e-10
FALSE	High	[R].NTSFGGAGSNSGPVSNALGR.[S]	1xTMT6plex [N-Term]; 2xPhospho [S3(98.7); S11(100)]	A0A0P0XDG3 2xPhospho [S75(98.7); S83(100)]	7.45503e-07	0	1	1	9	A0A0P0XDG3	A0A0P0XDG3 [73-92]	0	2238.97	High	High	High	High	High	High	High	High	High	S3(Phospho): 99.35; S11(Phospho): 100	1	1.27282	1.09101	0.974364	0.861549	0.946023	0.982039	0.940277	0.983191	7	7	7	7	7	7	7	7	7	Unique	4.5727	High	0	3.792e-08
FALSE	High	[R].AADGTGSETEVPEVVK.[A]	2xTMT6plex [N-Term; K16]; 1xPhospho [T5(100)]	Q6ZL81 1xPhospho [T52(100)]	0.000357983	0	1	1	4	Q6ZL81	Q6ZL81 [48-63]	0	2127.06	High	High	High	High	High	High	High	High	High	T5(Phospho): 100	1	1.05764	1.07956	1.2568	1.26267	1.16494	1.22447	1.22169	1.22326	3	3	3	3	3	3	3	3	3	Unique	3.67543	High	0	0.0001058
FALSE	High	[R].QNSFGSIGTPR.[T]	1xTMT6plex [N-Term]; 2xPhospho [S3(100); S6(100)]	Q0J9W2 2xPhospho [S1127(100); S1130(100)]	0.00112026	0	1	1	3	Q0J9W2	Q0J9W2 [1125-1135]	0	1552.68	High	High	High	High	High	High	High	High	High	S3(Phospho): 100; S6(Phospho): 100	1	1.09418	0.976564	0.809201	0.883666	0.746654	0.935636	0.948921	0.938555	3	3	3	3	3	3	3	3	3	Unique	2.8272	High	0	0.0001941
FALSE	High	[R].AAALNIVPTSTGAAK.[A]	2xTMT6plex [N-Term; K15]; 1xPhospho [S10(99.4)]	Q7X8A1 1xPhospho [T277(99.5)]; Q9SNK3 1xPhospho [T289(99.5)]	2.10846e-06	0	2	3	15	Q7X8A1; Q9SNK3	Q7X8A1 [267-281]; Q9SNK3 [279-293]	0	1923.07	High	High	High	High	High	High	High	High	High	S10(Phospho): 99.51	1	1.08504	0.99373	1.03593	0.999276	1.03496	1.11178	1.09395	1.12796	8	8	8	8	8	8	8	8	8	Not Unique	4.17895	High	0	1.27e-07
FALSE	High	[K].TVEELSDNEGEDLGEDLVPSNDR.[Q]	1xTMT6plex [N-Term]; 1xPhospho [S6(100)]	Q6AVL0 1xPhospho [S159(100)]	1.57076e-10	0	1	1	6	Q6AVL0	Q6AVL0 [154-176]	0	2841.25	High	High	High	High	High	High	High	High	High	S6(Phospho): 100	1	1.19263	0.855447	1.01737	1.08774	0.931363	1.3097	1.23321	1.39336	6	6	6	6	6	6	6	6	6	Unique	6.49847	High	0	1.962e-12
FALSE	High	[K].SYASASSGELGVVAGGGGR.[S]	1xTMT6plex [N-Term]; 1xPhospho [S6(98.8)]	Q68UR2 1xPhospho [S9(100)]	7.08316e-08	0	1	2	5	Q68UR2	Q68UR2 [4-22]	0	1990.94	High	High	High	High	High	High	High	High	High	S6(Phospho): 98.85	1	1.12869	1.03665	1.12682	1.18526	1.15321	1.25856	1.36575	1.5152	3	3	3	3	3	3	3	3	3	Unique	5.06616	High	0	2.437e-09
FALSE	High	[R].TTAPSAAASASAAPASWGSLDSGSK.[A]	2xTMT6plex [N-Term; K25]; 1xPhospho [S19(100)]	Q5VQG6 1xPhospho [S92(100)]	2.04274e-06	0	1	1	1	Q5VQG6	Q5VQG6 [74-98]	0	2787.36	High	High	High	High	High	High	High	High	High	S19(Phospho): 99.99	1	0.921625	0.61226	1.03593	0.682604	0.632311	0.834307	1.00463	1.21723	1	1	1	1	1	1	1	1	1	Unique	4.53505	High	0	1.221e-07
FALSE	High	[R].SLSLSDLQNSGGSC.[-]	1xTMT6plex [N-Term]; 1xCarbamidomethyl [C14]; 1xPhospho [S3(100)]	Q0J0U2 1xPhospho [S248(99.5)]	0.000492727	0	1	1	3	Q0J0U2	Q0J0U2 [246-259]	0	1733.76	High	High	High	High	High	High	High	High	High	S3(Phospho): 99.99	1	1.0079	0.917436	1.11509	0.960069	0.930386	1.25762	1.09299	1.28116	3	3	3	3	3	3	3	3	3	Unique	2.92763	High	0	7.352e-05
FALSE	High	[K].SASMGSLAQLAEGGGGGGGR.[E]	1xTMT6plex [N-Term]; 1xPhospho [S]		4.82393e-12	0	1	1	17	Q6ZDM0	Q6ZDM0 [66-85]	0	2028.94	High	High	High	High	High	High	High	High	High	S3(Phospho): 99.5	1	1.0211	0.999452	0.947	0.942979	0.911817	1.00003	1.0248	1.10986	11	11	11	11	11	11	11	11	11	Unique	7.35788	High	0	3.381e-14
FALSE	High	[R].IVSDEEEEVTTDR.[N]	1xTMT6plex [N-Term]; 1xPhospho [S3(100)]	Q53JI9 1xPhospho [S105(100)]	2.15344e-06	0	1	1	8	Q53JI9	Q53JI9 [103-115]	0	1830.82	High	High	High	High	High	High	High	High	High	S3(Phospho): 100	1	1.01501	0.881196	1.05646	1.15711	1.00075	1.32106	1.24858	1.26669	8	8	8	8	8	8	8	8	8	Unique	4.42008	High	0	1.306e-07
FALSE	High	[K].SASMGSLAQLAEGGGGGGGR.[E]	1xTMT6plex [N-Term]; 1xOxidation [M4(100)]; 1xPhospho [S3(97.7)]	Q6ZDM0 1xPhospho [S68(98.6)]	1.22375e-09	0	1	1	8	Q6ZDM0	Q6ZDM0 [66-85]	0	2044.93	High	High	High	High	High	High	High	High	High	S3(Phospho): 99.99; M4(Oxidation): 100	1	0.976435	0.908853	0.992933	0.986207	1.00857	1.11557	1.06513	1.21964	4	4	4	4	4	4	4	4	4	Unique	5.36926	High	0	3.128e-11
FALSE	High	[R].AAPSPAAAAPAEGAASESEAAAAPAPAEE.[-]	1xTMT6plex [N-Term]; 1xPhospho [S]		1.11926e-06	0	1	1	8	A0A0P0X830	A0A0P0X830 [57-85]	0	2842.3	High	High	High	High	High	High	High	High	High	S16(Phospho): 99.01	1	1.00993	0.955583	0.999774	0.888692	0.924522	1.30686	1.17078	1.42472	4	4	4	4	4	4	4	4	4	Unique	4.64814	High	0	6.09e-08
FALSE	High	[R].GFVPFSPGSPTEQSHGGR.[-]	1xTMT6plex [N-Term]; 1xPhospho [S9(100)]	Q9SXJ8 1xPhospho [S526(100)]	0.000151195	0	1	1	1	Q9SXJ8	Q9SXJ8 [518-535]	0	2153	High	High	High	High	High	High	High	High	High	S9(Phospho): 100	1	1.1429	0.905038	0.820929	1.10483	0.777928	1.10136	0.967169	1.0797	1	1	1	1	1	1	1	1	1	Unique	3.57365	High	0	1.851e-05
FALSE	High	[K].DQSVNQVTSPVAASEPVGSILPK.[G]	2xTMT6plex [N-Term; K23]; 1xPhospho [T/S]		1.15713e-07	0	1	2	16	Q5NAW2	Q5NAW2 [427-449]	0	2861.51	High	High	High	High	High	High	High	High	High	S9(Phospho): 99.45	1	0.978465	0.968935	0.85318	0.83139	0.916704	0.927113	0.98926	1.01335	5	5	5	5	5	5	5	5	5	Unique	4.65223	High	0	4.311e-09
FALSE	High	[K].DAEDVTSDSETSALISR.[L]	1xTMT6plex [N-Term]; 1xPhospho [S7(98.8)]	Q0JBF7 1xPhospho [S186(98.8)]	0.000934961	0	1	1	6	Q0JBF7	Q0JBF7 [180-196]	0	2104.95	High	High	High	High	High	High	High	High	High	S7(Phospho): 98.75	1	1.00384	0.964166	1.08187	1.14203	1.19035	1.27182	1.30333	1.40904	2	2	2	2	2	2	2	2	2	Unique	2.86663	High	0	0.000284
FALSE	High	[K].VTDDGSQGIQGLMIR.[-]	1xTMT6plex [N-Term]; 1xPhospho [S6(100)]	Q0JFH5 1xPhospho [S407(100)]	2.19537e-05	0	1	1	4	Q0JFH5	Q0JFH5 [402-416]	0	1898.92	High	High	High	High	High	High	High	High	High	S6(Phospho): 100	1	1.40578	1.08242	1.18448	1.16716	0.971432	1.39777	1.46852	1.31374	4	4	4	4	4	4	4	4	4	Unique	3.84734	High	0	1.946e-06
FALSE	High	[K].EVPFDEDCSDDEPDGGGGR.[R]	1xTMT6plex [N-Term]; 1xCarbamidomethyl [C8]; 1xPhospho [S9(100)]	Q5W6B4 1xPhospho [S84(100)]	1.24586e-07	0	1	1	9	Q5W6B4	Q5W6B4 [76-94]	0	2361.9	High	High	High	High	High	High	High	High	High	S9(Phospho): 100	1	1.07591	0.945093	0.949932	0.898745	0.879567	1.16481	1.08242	1.29564	9	9	9	9	9	9	9	9	9	Unique	4.31575	High	0	4.707e-09
FALSE	High	[K].ELGEGSASVSPVSGLSSSR.[E]	1xTMT6plex [N-Term]; 3xPhospho [S10(100); S13(100); S]	Q0DKN6 3xPhospho [S471(100); S474(100); S]	1.08437e-06	0	1	2	5	Q0DKN6	Q0DKN6 [462-480]	0	2274.95	High	High	High	High	High	High	High	High	High	S6(Phospho): 98.42; S10(Phospho): 100; S13(Phospho): 98.39	1	1.05459	0.969888	1.07796	1.08674	0.95775	1.27845	1.33598	1.36561	5	5	5	5	5	5	5	5	5	Unique	4.64866	High	0	5.846e-08
FALSE	High	[K].ELGEGSASVSPVSGLSSSR.[E]	1xTMT6plex [N-Term]; 2xPhospho [S6(100); S10(100)]	Q0DKN6 2xPhospho [S467(100); S471(100)]	5.45781e-10	0	1	2	35	Q0DKN6	Q0DKN6 [462-480]	0	2194.98	High	High	High	High	High	High	High	High	High	S6(Phospho): 100; S10(Phospho): 99.56	1	0.952075	1.04046	1.09457	1.08473	1.0848	1.18186	1.22937	1.10745	26	26	26	26	26	26	26	26	26	Unique	6.0921	High	0	8.393e-12
FALSE	High	[K].ELGEGSASVSPVSGLSSSR.[E]	1xTMT6plex [N-Term]; 1xPhospho [S17(98.7)]	Q0DKN6 1xPhospho [S471(99.4)]	4.0959e-12	0	1	2	52	Q0DKN6	Q0DKN6 [462-480]	0	2115.02	High	High	High	High	High	High	High	High	High	S10(Phospho): 100	1	0.994705	1.00327	0.990978	0.916841	0.911817	1.01992	1.05265	1.08332	23	23	23	23	23	23	23	23	23	Unique	7.27073	High	0	3.183e-14
FALSE	High	[R].TLHGLQPPEVASNTLFNDK.[S]	2xTMT6plex [N-Term; K19]; 1xPhospho [T1(100)]	Q7XPY2 1xPhospho [T881(100)]	3.10296e-10	0	1	3	4	Q7XPY2	Q7XPY2 [881-899]	0	2619.36	High	High	High	High	High	High	High	High	High	T1(Phospho): 100	1	1.0485	1.02997	1.02127	1.00732	1.00662	1.15723	1.23225	1.27272	4	4	4	4	4	4	4	4	4	Unique	5.66611	High	0	5.194e-11
FALSE	High	[K].IDDDSESEDGSPFRK.[D]	2xTMT6plex [N-Term; K15]; 3xPhospho [S5(100); S7(100); S11(100)]	Q10NF9 3xPhospho [S674(100); S676(100); S680(100)]	0.000128422	0	1	2	3	Q10NF9	Q10NF9 [670-684]	1	2394.95	High	High	High	High	High	High	High	High	High	S5(Phospho): 100; S7(Phospho): 100; S11(Phospho): 100	1	1.07083	1.08147	1.16201	1.27171	1.22748	1.31728	1.35423	1.33304	3	3	3	3	3	3	3	3	3	Unique	4.30572	High	0	1.53e-05
FALSE	High	[K].LADDDGEDSLDENDLT.[-]	1xTMT6plex [N-Term]; 1xPhospho [S9(100)]	Q7X6D9 1xPhospho [S291(100)]	1.22221e-05	0	1	1	28	Q7X6D9	Q7X6D9 [283-298]	0	2045.83	High	High	High	High	High	High	High	High	High	S9(Phospho): 100	1	1.08403	0.912668	0.919636	0.854512	0.860998	1.05969	0.997904	1.14846	20	20	20	20	20	20	20	20	20	Unique	4.12521	High	0	6.341e-06
FALSE	High	[R].ATQNFSPSFK.[L]	2xTMT6plex [N-Term; K10]; 1xPhospho [S8(100)]	Q6K270 1xPhospho [S243(100)]	0.000497908	0	1	1	6	Q6K270	Q6K270 [236-245]	0	1664.84	High	High	High	High	High	High	High	High	High	S8(Phospho): 100	1	1.15305	0.749589	0.917681	0.806257	0.829724	0.820102	0.782764	0.801029	6	6	6	6	6	6	6	6	6	Unique	3.19637	High	0	7.476e-05
FALSE	High	[K].ALLSPLPSPR.[T]	1xTMT6plex [N-Term]; 2xPhospho [S4(100); S8(100)]	Q6I5K0 2xPhospho [S699(100); S703(100)]	0.00119782	0	1	1	18	Q6I5K0	Q6I5K0 [696-705]	0	1439.73	High	High	High	High	High	High	High	High	High	S4(Phospho): 100; S8(Phospho): 100	1	1.56108	1.1158	1.11412	0.891708	0.872725	0.73866	0.86056	0.721409	18	18	18	18	18	18	18	18	18	Unique	3.74147	High	0	0.0002093
FALSE	High	[R].NLGSGGIDNTFSPR.[K]	1xTMT6plex [N-Term]; 1xPhospho [S12(99.5)]	Q0J9W2 1xPhospho [S1118(100)]	1.18807e-07	0	1	1	13	Q0J9W2	Q0J9W2 [1107-1120]	0	1743.83	High	High	High	High	High	High	High	High	High	S12(Phospho): 100	1	1.04444	1.05572	0.947977	0.902766	0.974364	1.13451	1.14581	1.11589	13	13	13	13	13	13	13	13	13	Unique	4.86798	High	0	4.456e-08
FALSE	High	[R].LNALNSSAGADDDDEEEDDE.[-]	1xTMT6plex [N-Term]; 1xPhospho [S6(99.5)]	A0A0P0VBK7 1xPhospho [S319(99.5)]	4.00582e-05	0	1	3	16	A0A0P0VBK7	A0A0P0VBK7 [314-333]	0	2432.93	High	High	High	High	High	High	High	High	High	S6(Phospho): 99.99	1	1.08606	1.00231	1.01834	1.01335	0.986092	1.38925	1.13813	1.29082	11	11	11	11	11	11	11	11	11	Unique	3.56736	High	0	3.923e-06
FALSE	High	[R].SDNDSWSDDDFGGGR.[R]	1xTMT6plex [N-Term]; 1xPhospho [S7(100)]	Q0DM51 1xPhospho [S691(100)]	7.03457e-07	0	1	3	3	Q0DM51	Q0DM51 [685-699]	0	1938.73	High	High	High	High	High	High	High	High	High	S7(Phospho): 100	1	1.43928	0.697137	1.03593	1.00028	0.710494	0.998138	0.851916	1.11589	3	3	3	3	3	3	3	3	3	Unique	3.94679	High	0	3.524e-08
FALSE	High	[K].ESQVSDFEDLEEDK.[F]	2xTMT6plex [N-Term; K14]; 1xPhospho [S5(99.6)]	Q6ASR0 1xPhospho [S93(100)]	7.45503e-07	0	1	2	3	Q6ASR0	Q6ASR0 [89-102]	0	2208	High	High	High	High	High	High	High	High	High	S5(Phospho): 100	1	1.285	0.693322	1.09946	1.14605	0.927454	0.907226	0.982537	0.996461	3	3	3	3	3	3	3	3	3	Unique	5.2174	High	0	4.438e-08
FALSE	High	[K].DNVALPSDSFKK.[L]	3xTMT6plex [N-Term; K11; K12]; 1xPhospho [S9(100)]	Q0DKG9 1xPhospho [S284(100)]	0.000497908	0	1	2	6	Q0DKG9	Q0DKG9 [276-287]	1	2088.13	High	High	High	High	High	High	High	High	High	S9(Phospho): 100	1	0.85362	0.744821	0.995865	1.10584	1.06232	0.490546	0.644459	0.51512	6	6	6	6	6	6	6	6	6	Unique	4.02014	High	0	7.452e-05
FALSE	High	[K].GGAPAEFQPSFR.[SG]	1xTMT6plex [N-Term]; 1xPhospho [S10(100)]	P0DKK8 1xPhospho [S155(100)]	0.000639771	0	1	2	6	P0DKK8	P0DKK8 [146-157]	0	1572.74	High	High	High	High	High	High	High	High	High	S10(Phospho): 100	1	0.99166	0.8173	0.846338	0.805252	0.894226	0.945106	0.971011	1.03265	6	6	6	6	6	6	6	6	6	Unique	2.93448	High	0	0.0001003
FALSE	High	[R].NVLYEDDSEETEEEGDNVGDGAR.[Y]	1xTMT6plex [N-Term]; 2xPhospho [S8(100); T11(100)]	Q0E0H1 2xPhospho [S312(100); T315(100)]	3.41218e-10	0	1	1	4	Q0E0H1	Q0E0H1 [305-327]	0	2931.13	High	High	High	High	High	High	High	High	High	S8(Phospho): 100; T11(Phospho): 100	1	1.05967	1.00422	1.06818	1.05959	1.03593	1.32675	1.20536	1.27151	4	4	4	4	4	4	4	4	4	Unique	5.92595	High	0	4.846e-12
FALSE	High	[R].NVLYEDDSEETEEEGDNVGDGAR.[Y]	1xTMT6plex [N-Term]; 1xPhospho [S8(99.6)]	Q0E0H1 1xPhospho [S312(99.4)]	5.97011e-10	0	1	1	10	Q0E0H1	Q0E0H1 [305-327]	0	2851.16	High	High	High	High	High	High	High	High	High	S8(Phospho): 100	1	0.984555	0.904085	0.965569	0.982186	0.986092	1.33432	1.2918	1.52847	7	7	7	7	7	7	7	7	7	Unique	5.31511	High	0	9.329e-12
FALSE	High	[K].FEFEPVDKLDS.[-]	2xTMT6plex [N-Term; K8]; 1xPhospho [S11(100)]	P0C512 1xPhospho [S477(100)]	9.31235e-05	0	1	4	9	P0C512	P0C512 [467-477]	1	1863.92	High	High	High	High	High	High	High	High	High	S11(Phospho): 100	1	0.94294	1.19877	1.33694	1.515	1.51774	1.28792	1.28124	1.09176	9	9	9	9	9	9	9	9	9	Unique	4.10384	High	0	1.049e-05
FALSE	High	[K].MTAGMSSMSFK.[M]	2xTMT6plex [N-Term; K11]; 2xOxidation [M1(100); M5(100)]; 1xPhospho [S9(100)]	Q6YUH7 1xPhospho [S35(100)]	0.000558587	0	1	1	2	Q6YUH7	Q6YUH7 [27-37]	0	1747.79	High	High	High	High	High	High	High	High	High	M1(Oxidation): 100; M5(Oxidation): 100; S9(Phospho): 100	1	0.92467	0.775338	0.922568	0.997265	0.855134	0.858929	1.01999	0.962683	2	2	2	2	2	2	2	2	2	Unique	3.01602	High	0	8.548e-05
FALSE	High	[K].MTAGMSSMSFK.[M]	2xTMT6plex [N-Term; K11]; 1xOxidation [M1(100)]; 1xPhospho [S9(100)]	Q6YUH7 1xPhospho [S35(100)]	9.76466e-05	0	1	1	7	Q6YUH7	Q6YUH7 [27-37]	0	1731.79	High	High	High	High	High	High	High	High	High	M1(Oxidation): 100; S9(Phospho): 100	1	1.03226	0.875474	0.938204	0.849485	0.872725	0.822943	0.71073	0.781727	7	7	7	7	7	7	7	7	7	Unique	3.3678	High	0	1.112e-05
FALSE	High	[K].MTAGMSSMSFK.[M]	2xTMT6plex [N-Term; K11]; 1xPhospho [S9(100)]	Q6YUH7 1xPhospho [S35(100)]	2.32655e-05	0	1	1	4	Q6YUH7	Q6YUH7 [27-37]	0	1715.8	High	High	High	High	High	High	High	High	High	S9(Phospho): 100	1	1.22511	0.972749	1.076	0.75197	0.828747	0.740554	0.767397	0.667122	4	4	4	4	4	4	4	4	4	Unique	4.22821	High	0	2.087e-06
FALSE	High	[R].SSVTINSSSTSPSPSSPEVGSTPAVR.[R]	1xTMT6plex [N-Term]; 2xPhospho [S15(96.7); S/T]	Q6Z2V3 2xPhospho [S533(99); S/T]	1.69822e-06	0	1	2	8	Q6Z2V3	Q6Z2V3 [518-543]	0	2907.32	High	High	High	High	High	High	High	High	High	S15(Phospho): 94.2; S16(Phospho): 99.77	1	1.21699	0.995637	1.01834	1.01637	1.00271	1.36841	1.19768	1.51399	5	5	5	5	5	5	5	5	5	Unique	3.85457	High	0	1.182e-06
FALSE	High	[R].GGDSWDEPFPSSAAAAAAAAGGGR.[L]	1xTMT6plex [N-Term]; 1xPhospho [S4(100)]	Q5ZDH9 1xPhospho [S35(100)]	1.5816e-11	0	1	1	9	Q5ZDH9	Q5ZDH9 [32-55]	0	2485.1	High	High	High	High	High	High	High	High	High	S4(Phospho): 100	1	1.09418	0.8173	1.03007	1.1923	1.03398	1.49626	1.57417	1.92295	9	9	9	9	9	9	9	9	9	Unique	7.30283	High	0	1.349e-13
FALSE	High	[K].NPDLNQAPSPENSDAE.[-]	1xTMT6plex [N-Term]; 2xPhospho [S9(100); S13(100)]	Q7XTV6 2xPhospho [S226(100); S230(100)]	7.21066e-06	0	1	1	11	Q7XTV6	Q7XTV6 [218-233]	0	2086.82	High	High	High	High	High	High	High	High	High	S9(Phospho): 100; S13(Phospho): 100	1	1.0211	1.0376	1.13269	1.04653	1.07405	1.28981	1.21496	1.32942	11	11	11	11	11	11	11	11	11	Unique	4.51745	High	0	5.338e-07
FALSE	High	[R].VDSEGVMCGATFK.[V]	2xTMT6plex [N-Term; K13]; 1xCarbamidomethyl [C8]; 1xOxidation [M7(100)]; 1xPhospho [S3(100)]	A3AYP1 1xPhospho [S220(100)]	0.000275367	0	1	2	2	A3AYP1	A3AYP1 [218-230]	0	1954.91	High	High	High	High	High	High	High	High	High	S3(Phospho): 100; M7(Oxidation): 100	1	0.909445	0.790597	1.49722	1.1169	1.07405	1.11462	1.1535	1.08694	2	2	2	2	2	2	2	2	2	Unique	3.53446	High	0	3.737e-05
FALSE	High	[R].VEQLCGEGDTESDS.[-]	1xTMT6plex [N-Term]; 1xCarbamidomethyl [C5]; 1xPhospho [S14(99.5)]		1.3511e-05	0	1	2	10	Q6YZW8	Q6YZW8 [993-1006]	0	1834.73	High	High	High	High	High	High	High	High	High	S14(Phospho): 99.5	1	1.18857	1.06716	1.34085	1.2305	1.1923	1.88358	1.67886	1.88194	5	5	5	5	5	5	5	5	5	Unique	3.37504	High	0	1.109e-06
FALSE	High	[K].ASNTISPENSMVQTNQDVNTK.[E]	2xTMT6plex [N-Term; K21]; 1xPhospho [S6(100)]	Q69XZ5 1xPhospho [S425(100)]	2.06776e-07	0	1	1	6	Q69XZ5	Q69XZ5 [420-440]	0	2816.35	High	High	High	High	High	High	High	High	High	S6(Phospho): 100	1	1.05865	0.923158	1.16005	1.12293	1.15125	1.54835	1.51174	1.6105	4	4	4	4	4	4	4	4	4	Unique	4.3601	High	0	8.489e-09
FALSE	High	[R].SRSLPYSPYR.[M]	1xTMT6plex [N-Term]; 3xPhospho [S1(100); S3(100); S7(100)]	Q5Z990 3xPhospho [S247(100); S249(100); S253(100)]	0.00147057	0	1	1	11	Q5Z990	Q5Z990 [247-256]	1	1694.69	High	High	High	High	High	High	High	High	High	S1(Phospho): 100; S3(Phospho): 100; S7(Phospho): 100	1	1.07286	0.912668	0.906931	0.907793	0.821906	0.89018	0.832707	0.974746	11	11	11	11	11	11	11	11	11	Unique	3.89775	High	0	0.0002666
FALSE	High	[R].IDIGGSPVSAAR.[D]	1xTMT6plex [N-Term]; 1xPhospho [S6(100)]	A0A0P0VU40 1xPhospho [S15(100)]	0.000874059	0	1	1	4	A0A0P0VU40	A0A0P0VU40 [10-21]	0	1451.75	High	High	High	High	High	High	High	High	High	S6(Phospho): 100	1	1.09418	1.02616	1.14539	1.19833	1.14148	1.4347	1.30525	1.3451	3	3	3	3	3	3	3	3	3	Unique	2.65691	High	0	0.0001444
FALSE	High	[R].GGFDGMYSPGGGLR.[S]	1xTMT6plex [N-Term]; 1xOxidation [M6(100)]; 1xPhospho [S8(100)]	Q69T31 1xPhospho [S71(100)]	0.00190632	0	1	1	3	Q69T31	Q69T31 [64-77]	0	1695.74	High	High	High	High	High	High	High	High	High	M6(Oxidation): 100; S8(Phospho): 99.99	1	1.22308	0.946046	0.915727	0.933931	0.899112	1.04454	1.04785	1.175	2	2	2	2	2	2	2	2	2	Unique	3.19308	High	0	0.0003631
FALSE	High	[R].GGFDGMYSPGGGLR.[S]	1xTMT6plex [N-Term]; 1xPhospho [S8(100)]	Q69T31 1xPhospho [S71(100)]	2.71119e-05	0	1	1	10	Q69T31	Q69T31 [64-77]	0	1679.75	High	High	High	High	High	High	High	High	High	S8(Phospho): 100	1	1.13782	0.820161	0.830702	0.760013	0.806269	0.816314	0.874006	0.980778	9	9	9	9	9	9	9	9	9	Unique	4.27775	High	0	2.5e-06
FALSE	High	[R].SSLGDRPATDSAGEGEEPSL.[-]	1xTMT6plex [N-Term]; 2xPhospho [T9(100); S11(100)]	Q8H811 2xPhospho [T664(100); S666(100)]	0.000755779	0	1	3	8	Q8H811	Q8H811 [656-675]	0	2363.98	High	High	High	High	High	High	High	High	High	T9(Phospho): 100; S11(Phospho): 100	1	1.07895	1.06621	1.04473	0.867581	0.949932	0.991509	0.963328	1.01938	8	8	8	8	8	8	8	8	8	Unique	4.02992	High	0	0.0001672
FALSE	High	[R].SSLGDRPATDSAGEGEEPSL.[-]	1xTMT6plex [N-Term]; 1xPhospho [S11(99.1)]	Q8H811 1xPhospho [S666(100)]	4.59499e-08	0	1	3	14	Q8H811	Q8H811 [656-675]	0	2284.02	High	High	High	High	High	High	High	High	High	S11(Phospho): 100	1	1.20684	1.11199	1.05743	0.762023	0.837543	0.697939	0.660787	0.73106	12	12	12	12	12	12	12	12	12	Unique	5.39135	High	0	1.466e-09
FALSE	High	[R].ESDSDAEDLEHIEK.[L]	2xTMT6plex [N-Term; K14]; 1xPhospho [S4(99.5)]	Q6AVJ1 1xPhospho [S435(99.5)]	2.36367e-05	0	1	1	6	Q6AVJ1	Q6AVJ1 [432-445]	0	2154.98	High	High	High	High	High	High	High	High	High	S4(Phospho): 99.54	1	1.16929	1.00041	0.952864	0.849485	0.807247	0.817261	0.8183	0.79741	3	3	3	3	3	3	3	3	3	Unique	4.51859	High	0	2.126e-06
FALSE	High	[K].QVSPTGSFAGAVVDDAELQR.[R]	1xTMT6plex [N-Term]; 2xPhospho [S3(99.6); T/S]	Q6YVF0 2xPhospho [S176(99.6); T178(100)]	2.19031e-10	0	1	1	4	Q6YVF0	Q6YVF0 [174-193]	0	2436.1	High	High	High	High	High	High	High	High	High	S3(Phospho): 99.64; T5(Phospho): 50.18; S7(Phospho): 50.18	1	1.12361	1.13106	1.22748	1.18224	1.14539	1.25572	1.31101	1.40663	2	2	2	2	2	2	2	2	2	Unique	6.58936	High	0	2.888e-12
FALSE	High	[K].EEIGEADLDSNSSSDNVPR.[S]	1xTMT6plex [N-Term]; 1xPhospho [S12(98.9)]		5.88854e-08	0	1	3	15	Q5KQP1	Q5KQP1 [450-468]	0	2343.02	High	High	High	High	High	High	High	High	High	S12(Phospho): 98.86	1	1.10839	0.945093	1.06134	1.01536	0.971432	1.28603	1.1996	1.38853	6	6	6	6	6	6	6	6	6	Unique	4.60535	High	0	2.629e-09
FALSE	High	[K].MSAGVSNMSFK.[M]	2xTMT6plex [N-Term; K11]; 1xOxidation [M1(100)]; 1xPhospho [S9(100)]	Q0IVD2 1xPhospho [S35(100)]	0.00034148	0	1	1	3	Q0IVD2	Q0IVD2 [27-37]	0	1712.82	High	High	High	High	High	High	High	High	High	M1(Oxidation): 100; S9(Phospho): 100	1	1.08301	0.780107	0.931363	0.781124	0.777928	0.770858	0.845193	0.927698	3	3	3	3	3	3	3	3	3	Unique	3.08438	High	0	4.803e-05
FALSE	High	[K].MSAGVSNMSFK.[M]	2xTMT6plex [N-Term; K11]; 1xPhospho [S9(100)]	Q0IVD2 1xPhospho [S35(100)]	0.00016976	0	1	1	3	Q0IVD2	Q0IVD2 [27-37]	0	1696.82	High	High	High	High	High	High	High	High	High	S9(Phospho): 100	1	1.15305	0.949861	1.16005	1.06362	1.07893	1.27277	1.18999	1.19069	3	3	3	3	3	3	3	3	3	Unique	3.06496	High	0	2.115e-05
FALSE	High	[R].NVVIEQSYGSPK.[V]	2xTMT6plex [N-Term; K12]; 1xPhospho [S10(100)]	Q8H903 1xPhospho [S77(100)]	1.36781e-06	0	1	1	5	Q8H903	Q8H903 [68-79]	0	1858.97	High	High	High	High	High	High	High	High	High	S10(Phospho): 100	1	1.12767	1.05953	1.14735	1.14002	1.15028	1.23773	1.28412	1.46212	5	5	5	5	5	5	5	5	5	Unique	4.50474	High	0	7.666e-08
FALSE	High	[R].GFVPFVPGSPTER.[S]	1xTMT6plex [N-Term]; 1xPhospho [S9(99.7)]	Q2R0E9 1xPhospho [S531(99.7)]	0.000626563	0	1	2	7	Q2R0E9	Q2R0E9 [523-535]	0	1698.85	High	High	High	High	High	High	High	High	High	S9(Phospho): 99.69	1	0.917565	0.986101	1.02616	0.966101	0.883476	1.09473	1.12756	1.17862	6	6	6	6	6	6	6	6	6	Unique	3.48211	High	0	0.0001507
FALSE	High	[K].KTPSDEAAASEAQASLENLLSR.[A]	2xTMT6plex [N-Term; K1]; 1xPhospho [S21(100)]	A0A0P0WKD6 1xPhospho [S403(100)]	9.36474e-11	0	1	2	4	A0A0P0WKD6	A0A0P0WKD6 [383-404]	1	2826.43	High	High	High	High	High	High	High	High	High	S21(Phospho): 100	1	1.01196	0.779153	0.763268	0.776098	0.660652	0.790745	0.784685	0.739504	4	4	4	4	4	4	4	4	4	Unique	5.76797	High	0	1.075e-12
FALSE	High	[R].RGGAAGDLDVFGAQASPGSTSR.[L]	1xTMT6plex [N-Term]; 1xPhospho [S16(100)]	Q10QF7 1xPhospho [S102(100)]	0.000224344	0	1	1	3	Q10QF7	Q10QF7 [87-108]	1	2386.13	High	High	High	High	High	High	High	High	High	S16(Phospho): 99.99	1	0.9673	0.808717	0.938204	1.09076	0.835588	1.13924	1.14101	1.34872	2	2	2	2	2	2	2	2	2	Unique	3.25071	High	0	2.938e-05
FALSE	High	[R].SFDDDYEDGGSGDDDRDDDGEGLGSPR.[S]	1xTMT6plex [N-Term]; 2xPhospho [S11(100); S25(100)]	Q6K4N6 2xPhospho [S47(100); S61(100)]	3.66209e-08	0	1	1	5	Q6K4N6	Q6K4N6 [37-63]	1	3252.16	High	High	High	High	High	High	High	High	High	S11(Phospho): 100; S25(Phospho): 100	1	1.0211	0.985147	1.06525	1.08272	0.954818	1.11367	1.06994	1.27996	5	5	5	5	5	5	5	5	5	Unique	5.67225	High	0	1.131e-09
FALSE	High	[R].SFDDDYEDGGSGDDDRDDDGEGLGSPR.[S]	1xTMT6plex [N-Term]; 1xPhospho [S25(100)]	Q6K4N6 1xPhospho [S61(100)]	1.08612e-07	0	1	1	4	Q6K4N6	Q6K4N6 [37-63]	1	3172.2	High	High	High	High	High	High	High	High	High	S25(Phospho): 100	1	1.0485	0.953676	0.901067	0.752976	0.742745	1.03507	0.896096	0.968715	4	4	4	4	4	4	4	4	4	Unique	4.97171	High	0	4.012e-09
FALSE	High	[K].ATGAFILTASHNPGGPTEDFGIK.[Y]	2xTMT6plex [N-Term; K23]; 1xPhospho [T/S]		5.59478e-09	0	1	1	7	Q9AUQ4	Q9AUQ4 [115-137]	0	2839.44	High	High	High	High	High	High	High	High	High	S10(Phospho): 100	1	1.10839	1.2703	1.26951	1.12494	1.15419	1.25667	1.44067	1.16777	4	4	4	4	4	4	4	4	4	Unique	5.51743	High	0	1.263e-10
FALSE	High	[R].TGSSGSFGSFDGSSASNK.[S]	2xTMT6plex [N-Term; K18]; 1xPhospho [S/T]	Q5N770 1xPhospho [S289(99.3)]	0.000226715	0	1	1	7	Q5N770	Q5N770 [281-298]	0	2218.01	High	High	High	High	High	High	High	High	High	S9(Phospho): 99.32	1	0.97745	0.80681	0.902044	0.920862	0.773041	1.06064	0.975813	1.16897	2	2	2	2	2	2	2	2	2	Unique	3.54384	High	0	2.977e-05
FALSE	High	[K].SSFSSEALSPK.[H]	2xTMT6plex [N-Term; K11]; 1xPhospho [S9(100)]	A0A0P0VNC6 1xPhospho [S626(100)]	0.00162859	0	1	1	3	A0A0P0VNC6	A0A0P0VNC6 [618-628]	0	1677.85	High	High	High	High	High	High	High	High	High	S9(Phospho): 100	1	1.02414	1.13869	1.13953	1.03949	1.06232	1.18659	1.08723	1.10262	3	3	3	3	3	3	3	3	3	Unique	3.0059	High	0	0.0003012
FALSE	High	[R].LASIGLENTEANR.[Q]	1xTMT6plex [N-Term]; 1xPhospho [S3(100)]	Q40677 1xPhospho [S75(100)]	1.7132e-05	0	1	1	5	Q40677	Q40677 [73-85]	0	1696.85	High	High	High	High	High	High	High	High	High	S3(Phospho): 100	1	1.0617	1.04046	1.05255	1.17118	1.02714	1.04644	1.00751	1.23412	5	5	5	5	5	5	5	5	5	Unique	4.15134	High	0	1.464e-06
FALSE	High	[R].NLSTPPPVVK.[K]	2xTMT6plex [N-Term; K10]; 1xPhospho [S3(99.8)]	Q0J716 1xPhospho [S806(99.8)]	0.000829869	0	1	1	6	Q0J716	Q0J716 [804-813]	0	1589.91	High	High	High	High	High	High	High	High	High	S3(Phospho): 99.7	1	1.03734	1.00327	0.875657	0.73488	0.90009	0.817261	0.799091	0.827569	5	5	5	5	5	5	5	5	5	Unique	3.20916	High	0.000294	0.002544
FALSE	High	[R].TLPDPDAEVIALSPK.[T]	2xTMT6plex [N-Term; K15]; 1xPhospho [S13(100)]	Q6EU15 1xPhospho [S85(100)]	8.6422e-07	0	1	1	4	Q6EU15	Q6EU15 [73-87]	0	2104.13	High	High	High	High	High	High	High	High	High	S13(Phospho): 100	1	1.14493	1.19591	1.17764	1.22748	1.16591	1.16481	1.38881	1.43558	4	4	4	4	4	4	4	4	4	Unique	4.59437	High	0	4.486e-08
FALSE	High	[R].VEQLCGEGDTESDS.[-]	1xTMT6plex [N-Term]; 1xCarbamidomethyl [C5]; 2xPhospho [T10(99.7); S]	Q6YZW8 2xPhospho [T1002(99.7); S]	9.71334e-05	0	1	2	1	Q6YZW8	Q6YZW8 [993-1006]	0	1914.69	High	High	High	High	High	High	High	High	High	T10(Phospho): 99.68; S12(Phospho): 50.16; S14(Phospho): 50.16	1	1.21801	0.945093	1.11021	1.14907	1.04962	1.44512	1.52999	1.65393	1	1	1	1	1	1	1	1	1	Unique	3.21095	High	0	1.102e-05
FALSE	High	[K].EIDTDPEDADNLNTK.[K]	2xTMT6plex [N-Term; K15]; 1xPhospho [T4(100)]	Q67WP0 1xPhospho [T306(100)]	5.15242e-07	0	1	1	7	Q67WP0	Q67WP0 [303-317]	0	2228.04	High	High	High	High	High	High	High	High	High	T4(Phospho): 100	1	1.16726	1.05381	1.10141	0.957053	0.99391	1.2169	1.21208	1.38612	7	7	7	7	7	7	7	7	7	Unique	5.17598	High	0	2.452e-08
FALSE	High	[K].IVSAPSDTPSDAAETAESPTENNASK.[K]	2xTMT6plex [N-Term; K26]; 1xPhospho [S18(97.6)]		4.06971e-05	0	1	1	12	Q5Z8P6	Q5Z8P6 [72-97]	0	3127.47	High	High	High	High	High	High	High	High	High	S18(Phospho): 97.6	1	0.990645	1.02711	1.12487	1.16917	1.04473	1.61464	1.16598	1.22688	4	4	4	4	4	4	4	4	4	Unique	3.68052	High	0	4.004e-06
FALSE	High	[K].GLVSYGDGSPDSAGK.[-]	2xTMT6plex [N-Term; K15]; 2xPhospho [S9(100); S12(100)]	A0A0P0VG74 2xPhospho [S361(100); S364(100)]	1.62206e-07	0	1	1	35	A0A0P0VG74	A0A0P0VG74 [353-367]	0	2027.91	High	High	High	High	High	High	High	High	High	S9(Phospho): 100; S12(Phospho): 100	1	0.952075	0.926019	0.996842	1.03848	0.947977	1.04549	1.10932	1.07005	35	35	35	35	35	35	35	35	35	Unique	5.52469	High	0	1.692e-08
FALSE	High	[R].VDSEGVMCGATFK.[V]	2xTMT6plex [N-Term; K13]; 1xCarbamidomethyl [C8]; 1xPhospho [S3(100)]	A3AYP1 1xPhospho [S220(100)]	1.13895e-07	0	1	2	7	A3AYP1	A3AYP1 [218-230]	0	1938.91	High	High	High	High	High	High	High	High	High	S3(Phospho): 100	1	1.25658	0.866891	1.84416	1.42754	1.4679	1.43565	1.56937	1.43196	7	7	7	7	7	7	7	7	7	Unique	5.34332	High	0	4.227e-09
FALSE	High	[K].MFNPNDPVDNPEAFSSSIAAPSPSR.[A]	1xTMT6plex [N-Term]; 1xOxidation [M1(100)]; 1xPhospho [S22(99.6)]	Q0J4A3 1xPhospho [S64(99.6)]	2.81852e-06	0	1	1	3	Q0J4A3	Q0J4A3 [43-67]	0	2972.33	High	High	High	High	High	High	High	High	High	M1(Oxidation): 100; S22(Phospho): 100	1	1.15609	1.01757	0.955796	1.0033	0.933318	1.24341	1.1631	1.36561	2	2	2	2	2	2	2	2	2	Unique	4.90265	High	0	1.784e-07
FALSE	High	[R].KVSGPLDPSVSMK.[M]	3xTMT6plex [N-Term; K1; K13]; 2xPhospho [S3(100); S11(99.5)]	A0A0P0XDG3 2xPhospho [S178(100); S186(99.4)]	5.02553e-05	0	1	1	13	A0A0P0XDG3	A0A0P0XDG3 [176-188]	1	2192.14	High	High	High	High	High	High	High	High	High	S3(Phospho): 100; S11(Phospho): 99.47	1	1.1835	1.08433	0.783792	0.495617	0.529695	0.275577	0.272767	0.271433	13	13	13	13	13	13	13	13	13	Unique	4.76803	High	0	5.125e-06
FALSE	High	[K].SLENLFVTNSQR.[V]	1xTMT6plex [N-Term]; 1xPhospho [S10(100)]	Q6Z901 1xPhospho [S581(100)]	0.000817044	0	1	1	2	Q6Z901	Q6Z901 [572-583]	0	1716.85	High	High	High	High	High	High	High	High	High	S10(Phospho): 100	1	1.52555	0.83542	1.08284	1.03245	1.04082	1.01329	1.1218	0.697282	2	2	2	2	2	2	2	2	2	Unique	3.38674	High	0	0.0001335
FALSE	High	[R].GYAETVGESEGAAGSPVRVDSEDSSAPK.[R]	2xTMT6plex [N-Term; K28]; 2xPhospho [S15(100); S21(100)]	Q6K5G2 2xPhospho [S48(100); S54(100)]	1.95426e-08	0	1	3	8	Q6K5G2	Q6K5G2 [34-61]	1	3370.51	High	High	High	High	High	High	High	High	High	S15(Phospho): 99.98; S21(Phospho): 100	1	1.01095	1.14346	1.06916	0.978165	0.992933	1.16955	1.1727	1.17983	5	5	5	5	5	5	5	5	5	Unique	5.51234	High	0	5.443e-10
FALSE	High	[K].GQSSSPTPLFSFK.[N]	2xTMT6plex [N-Term; K13]; 1xPhospho [S5(99.7)]	Q5W645 1xPhospho [S254(100)]	0.000139713	0	1	1	27	Q5W645	Q5W645 [244-256]	0	1920.99	High	High	High	High	High	High	High	High	High	S11(Phospho): 100	1	1.06373	0.856401	1.11509	0.954037	0.973387	0.895862	0.926831	0.93373	14	14	14	14	14	14	14	14	14	Unique	3.65936	High	0	1.684e-05
FALSE	High	[R].NQSFDDDDDDFSNKPVAK.[K]	3xTMT6plex [N-Term; K14; K18]; 1xPhospho [S3(100)]	Q84VG3 1xPhospho [S378(100)]	3.44287e-09	0	1	1	9	Q84VG3	Q84VG3 [376-393]	0	2824.33	High	High	High	High	High	High	High	High	High	S3(Phospho): 100	1	1.03328	1.32561	1.10141	0.854512	0.975342	0.812526	0.794289	0.822744	9	9	9	9	9	9	9	9	9	Unique	6.35235	High	0	7.156e-11
FALSE	High	[K].ISSDNVLAASPQSNK.[M]	2xTMT6plex [N-Term; K15]; 1xPhospho [S10(100)]	Q6F3A8 1xPhospho [S288(100)]	1.32988e-05	0	1	1	3	Q6F3A8	Q6F3A8 [279-293]	0	2069.07	High	High	High	High	High	High	High	High	High	S10(Phospho): 100	1	0.984555	0.88215	0.978273	0.875623	0.949932	1.03981	0.934514	1.14243	3	3	3	3	3	3	3	3	3	Unique	4.39357	High	0	1.089e-06
FALSE	High	[R].EMLEDESEDEEEAK.[E]	2xTMT6plex [N-Term; K14]; 1xPhospho [S7(100)]	Q0INC5 1xPhospho [S696(100)]	0.000246605	0	1	1	4	Q0INC5	Q0INC5 [690-703]	0	2220.95	High	High	High	High	High	High	High	High	High	S7(Phospho): 100	1	1.17538	1.03855	0.992933	1.04451	0.978273	1.17712	1.16694	1.18948	4	4	4	4	4	4	4	4	4	Unique	3.01317	High	0	3.277e-05
FALSE	High	[K].LIHPLPPPVNSPESSPER.[A]	1xTMT6plex [N-Term]; 2xPhospho [S11(99.8); S]	Q60EX6 2xPhospho [S841(99.8); S]	6.81531e-07	0	1	1	38	Q60EX6	Q60EX6 [831-848]	0	2355.13	High	High	High	High	High	High	High	High	High	S11(Phospho): 99.99; S15(Phospho): 99.29	1	1.14899	1.00327	1.0975	1.03245	1.00271	1.24815	1.25242	1.33183	30	30	30	30	30	30	30	30	30	Unique	5.68411	High	0	8.887e-08
FALSE	High	[K].LIHPLPPPVNSPESSPER.[A]	1xTMT6plex [N-Term]; 1xPhospho [S11(100)]	Q60EX6 1xPhospho [S841(100)]	0.001204	0	1	1	3	Q60EX6	Q60EX6 [831-848]	0	2275.17	High	High	High	High	High	High	High	High	High	S11(Phospho): 99.99	1	0.92873	1.0128	0.925499	0.837421	0.927454	1.24815	1.10643	1.18948	3	3	3	3	3	3	3	3	3	Unique	3.33095	High	6.595e-05	0.00063
FALSE	High	[R].ENDLGISNQGSPDHVFSR.[R]	1xTMT6plex [N-Term]; 1xPhospho [S11(100)]	C7J7X6 1xPhospho [S199(100)]	1.00506e-08	0	1	1	4	C7J7X6	C7J7X6 [189-206]	0	2281.04	High	High	High	High	High	High	High	High	High	S11(Phospho): 100	1	1.16015	1.05572	0.880544	0.986207	0.934295	1.22731	1.22361	1.35717	4	4	4	4	4	4	4	4	4	Unique	5.09016	High	0	2.505e-10
FALSE	High	[K].TGGGVVITAVDSGGNAAR.[A]	1xTMT6plex [N-Term]; 1xPhospho [T1(100)]	Q84SC5 1xPhospho [T91(100)]	9.36919e-08	0	1	1	7	Q84SC5	Q84SC5 [91-108]	0	1910.95	High	High	High	High	High	High	High	High	High	T1(Phospho): 100	1	0.88001	0.920297	0.989024	0.989223	1.14539	1.1686	1.22361	1.29685	7	7	7	7	7	7	7	7	7	Unique	5.53046	High	0	3.367e-09
FALSE	High	[R].ISNSDDNVVVEK.[T]	2xTMT6plex [N-Term; K12]; 1xPhospho [S2(100)]	Q10A91 1xPhospho [S1017(100)]	9.97267e-05	0	1	1	16	Q10A91	Q10A91 [1016-1027]	0	1856.94	High	High	High	High	High	High	High	High	High	S2(Phospho): 100	1	1.20481	1.07765	0.752518	0.666519	0.601037	0.617444	0.549375	0.653852	9	9	9	9	9	9	9	9	9	Unique	3.98376	High	0	1.136e-05
FALSE	High	[R].EALEEASEDGSLAK.[S]	2xTMT6plex [N-Term; K14]; 2xPhospho [S7(100); S11(100)]	Q7Y0C6 2xPhospho [S50(100); S54(100)]	3.56693e-05	0	1	1	4	Q7Y0C6	Q7Y0C6 [44-57]	0	2066.93	High	High	High	High	High	High	High	High	High	S7(Phospho): 100; S11(Phospho): 100	1	1.16726	0.826837	0.937227	0.832395	0.84927	0.955523	0.939316	0.980778	4	4	4	4	4	4	4	4	4	Unique	3.79707	High	0	3.427e-06
FALSE	High	[R].EALEEASEDGSLAK.[S]	2xTMT6plex [N-Term; K14]; 1xPhospho [S7(100)]	Q7Y0C6 1xPhospho [S50(100)]	1.83484e-05	0	1	1	5	Q7Y0C6	Q7Y0C6 [44-57]	0	1986.97	High	High	High	High	High	High	High	High	High	S7(Phospho): 100	1	1.08403	0.960351	1.15712	1.01436	1.05841	1.12693	1.10932	1.16415	5	5	5	5	5	5	5	5	5	Unique	3.75436	High	0	1.585e-06
FALSE	High	[R].SASGGSFEDPSFTGSR.[A]	1xTMT6plex [N-Term]; 1xPhospho [S3(99.3)]	Q6Z7R3 1xPhospho [S685(99.3)]	1.40936e-05	0	1	1	12	Q6Z7R3	Q6Z7R3 [683-698]	0	1897.82	High	High	High	High	High	High	High	High	High	S3(Phospho): 100	1	0.966285	1.02997	0.93625	0.968111	0.959705	1.16765	1.12372	1.20396	8	8	8	8	8	8	8	8	8	Unique	4.1347	High	0	1.163e-06
FALSE	High	[R].DYQLNNSGADDDEIPNSPALEMEDVDTR.[A]	1xTMT6plex [N-Term]; 1xPhospho [S17(100)]	Q5JJM4 1xPhospho [S193(100)]	3.44839e-10	0	1	1	3	Q5JJM4	Q5JJM4 [177-204]	0	3432.46	High	High	High	High	High	High	High	High	High	S17(Phospho): 100	1	0.731819	1.09673	0.956773	0.878639	0.907908	1.24341	1.23994	1.48022	3	3	3	3	3	3	3	3	3	Unique	5.39902	High	0	4.904e-12
FALSE	High	[R].SFASISPPR.[R]	1xTMT6plex [N-Term]; 1xPhospho [S6(100)]	Q0DI98 1xPhospho [S65(100)]	0.000375278	0	1	1	29	Q0DI98	Q0DI98 [60-68]	0	1270.64	High	High	High	High	High	High	High	High	High	S6(Phospho): 100	1	0.96527	1.01948	1.04473	0.985202	1.02812	1.01329	1.01999	1.04592	28	28	28	28	28	28	28	28	28	Unique	3.58602	High	0	9.438e-05
FALSE	High	[R].SVSCAERPPAAFGGGAAADLR.[C]	1xTMT6plex [N-Term]; 1xCarbamidomethyl [C4]; 1xPhospho [S]	Q6YVF0 1xPhospho [S8(99.4)]	5.55514e-05	0	1	1	5	Q6YVF0	Q6YVF0 [6-26]	0	2369.13	High	High	High	High	High	High	High	High	High	S3(Phospho): 99.41	1	1.08403	1.06907	1.24996	0.971127	0.995865	0.859876	0.825023	0.904777	5	5	5	5	5	5	5	5	5	Unique	4.49343	High	0	5.753e-06
FALSE	High	[R].EVLLQSSPTK.[K]	2xTMT6plex [N-Term; K10]; 1xPhospho [S7(100)]	Q5ZAN2 1xPhospho [S262(100)]	0.00102618	0	1	1	5	Q5ZAN2	Q5ZAN2 [256-265]	0	1639.91	High	High	High	High	High	High	High	High	High	S7(Phospho): 100	1	0.98963	0.925065	0.990978	0.939963	0.872725	1.20269	1.19672	1.10865	5	5	5	5	5	5	5	5	5	Unique	3.05423	High	6.595e-05	0.0004698
FALSE	High	[R].APAPAPAPLTPALSQR.[F]	1xTMT6plex [N-Term]; 1xPhospho [S14(100)]	Q0DPW6 1xPhospho [S29(100)]	8.74795e-08	0	1	1	9	Q0DPW6	Q0DPW6 [16-31]	0	1867	High	High	High	High	High	High	High	High	High	S14(Phospho): 100	1	1.12361	1.09482	1.11509	1.02944	0.996842	1.03791	0.985418	1.06281	9	9	9	9	9	9	9	9	9	Unique	5.50381	High	0	3.12e-09
FALSE	High	[K].QVSPTGSFAGAVVDDAELQR.[R]	1xTMT6plex [N-Term]; 1xPhospho [S3(99.5)]	Q6YVF0 1xPhospho [S176(99.5)]	2.50724e-12	0	1	1	10	Q6YVF0	Q6YVF0 [174-193]	0	2356.14	High	High	High	High	High	High	High	High	High	S3(Phospho): 99.52	1	1.16624	1.01948	1.10728	1.05758	0.959705	1.05875	1.02095	1.01576	7	7	7	7	7	7	7	7	7	Unique	7.29135	High	0	1.585e-14
FALSE	High	[R].DDSDEDMESGWDDR.[D]	1xTMT6plex [N-Term]; 1xPhospho [S3(100)]	Q6YSC2 1xPhospho [S404(100)]	1.78371e-07	0	1	1	10	Q6YSC2	Q6YSC2 [402-415]	0	1980.7	High	High	High	High	High	High	High	High	High	S3(Phospho): 100	1	0.95715	0.886918	0.974364	0.800225	0.935272	1.04075	1.05265	1.26186	10	10	10	10	10	10	10	10	10	Unique	4.5295	High	0	7.139e-09
FALSE	High	[K].GLVSYGDGSPDSAGK.[-]	2xTMT6plex [N-Term; K15]; 3xPhospho [S4(100); S9(100); S12(100)]	A0A0P0VG74 3xPhospho [S356(100); S361(100); S364(100)]	0.00016535	0	1	1	4	A0A0P0VG74	A0A0P0VG74 [353-367]	0	2107.88	High	High	High	High	High	High	High	High	High	S4(Phospho): 100; S9(Phospho): 100; S12(Phospho): 100	1	0.93482	0.963212	0.814088	0.870597	0.970455	0.910067	1.00655	0.919254	2	2	2	2	2	2	2	2	2	Unique	4.09352	High	0	2.057e-05
FALSE	High	[K].GLVSYGDGSPDSAGK.[-]	2xTMT6plex [N-Term; K15]; 1xPhospho [S9(99.7)]	A0A0P0VG74 1xPhospho [S364(100)]	7.69487e-07	0	1	1	6	A0A0P0VG74	A0A0P0VG74 [353-367]	0	1947.95	High	High	High	High	High	High	High	High	High	S12(Phospho): 100	1	1.0617	1.05953	1.05255	1.06261	0.965569	1.45175	1.47428	1.40783	5	5	5	5	5	5	5	5	5	Unique	4.57094	High	0	9.362e-07
FALSE	High	[R].SISPAANEK.[K]	2xTMT6plex [N-Term; K9]; 2xPhospho [S1(100); S3(100)]	Q0DL70 2xPhospho [S211(100); S213(100)]	0.000842891	0	1	2	19	Q0DL70	Q0DL70 [211-219]	0	1534.73	High	High	High	High	High	High	High	High	High	S1(Phospho): 100; S3(Phospho): 100	1	1.06982	1.02616	1.21282	1.08473	1.06818	1.15534	1.23033	1.12554	19	19	19	19	19	19	19	19	19	Unique	4.32365	High	0	0.0002465
FALSE	High	[R].SDSSSLDEILR.[C]	1xTMT6plex [N-Term]; 1xPhospho [S3(100)]	Q0D4F7 1xPhospho [S584(99.6)]	6.73258e-06	0	1	1	10	Q0D4F7	Q0D4F7 [581-591]	0	1530.72	High	High	High	High	High	High	High	High	High	S3(Phospho): 100	1	0.933805	1.2188	1.45813	1.45971	1.56954	1.22447	1.28124	1.27272	7	7	7	7	7	7	7	7	7	Unique	4.66583	High	0	4.915e-07
FALSE	High	[R].VDSQGQMCGSNYK.[V]	2xTMT6plex [N-Term; K13]; 1xCarbamidomethyl [C8]; 1xOxidation [M7(100)]; 1xPhospho [S3(100)]	Q7XXR0 1xPhospho [S217(100)]	1.13712e-06	0	1	1	10	Q7XXR0	Q7XXR0 [215-227]	0	2027.9	High	High	High	High	High	High	High	High	High	S3(Phospho): 100; M7(Oxidation): 100	1	1.12158	0.990869	0.990001	0.998271	0.922568	1.47827	1.45892	1.53088	10	10	10	10	10	10	10	10	10	Unique	5.50503	High	0	6.189e-08
FALSE	High	[R].ARSYSRSPQYNR.[G]	1xTMT6plex [N-Term]; 3xPhospho [S3(100); S7(99.2); S/Y]	Q69KL9 3xPhospho [S159(100); S163(97.8); S/Y]	0.000462742	0	1	1	4	Q69KL9	Q69KL9 [157-168]	2	1953.8	High	High	High	High	High	High	High	High	High	S3(Phospho): 100; S5(Phospho): 99.98; S7(Phospho): 100	1	1.21699	1.09959	1.14735	1.16013	0.984137	1.44607	1.18039	1.30167	4	4	4	4	4	4	4	4	4	Unique	4.0188	High	0	6.826e-05
FALSE	High	[R].INYQQYDYSDTDTEGGK.[E]	2xTMT6plex [N-Term; K17]; 2xPhospho [Y8(99); S9(99)]	Q0D802 2xPhospho [Y462(99); S463(99)]	0.000582419	0	1	1	1	Q0D802	Q0D802 [455-471]	0	2615.1	High	High	High	High	High	High	High	High	High	Y8(Phospho): 99.03; S9(Phospho): 99.03	1	1.17335	1.12724	0.942114	0.972133	1.05157	1.17523	1.13237	1.34028	1	1	1	1	1	1	1	1	1	Unique	2.64532	High	0	8.975e-05
FALSE	High	[K].QQGDHPAGSDDGGNNNNNK.[N]	2xTMT6plex [N-Term; K19]; 1xPhospho [S9(100)]	Q5N8I8 1xPhospho [S23(100)]	0.000167982	0	1	1	20	Q5N8I8	Q5N8I8 [15-33]	0	2477.08	High	High	High	High	High	High	High	High	High	S9(Phospho): 100	1	1.11042	1.12248	1.45324	1.10081	1.15516	2.02942	1.74897	2.01343	20	20	20	20	20	20	20	20	20	Unique	4.22972	High	0.0006995	0.004899
FALSE	High	[R].RPPPPPPDSPEGR.[S]	1xTMT6plex [N-Term]; 1xPhospho [S9(100)]	Q5Z4U6 1xPhospho [S25(100)]	3.05071e-06	0	1	1	15	Q5Z4U6	Q5Z4U6 [17-29]	0	1707.84	High	High	High	High	High	High	High	High	High	S9(Phospho): 100	1	1.16624	1.07289	1.11119	0.92991	1.00955	1.14966	1.09971	1.10262	15	15	15	15	15	15	15	15	15	Unique	5.29434	High	0	1.957e-07
FALSE	High	[R].QQAQAQAQQVGTPR.[R]	1xTMT6plex [N-Term]; 1xPhospho [T12(100)]	Q5Z7T2 1xPhospho [T51(100)]	1.04456e-09	0	1	1	15	Q5Z7T2	Q5Z7T2 [40-53]	0	1819.9	High	High	High	High	High	High	High	High	High	T12(Phospho): 100	1	1.02313	1.07575	1.19523	1.09579	1.1366	1.30118	1.24282	1.30891	15	15	15	15	15	15	15	15	15	Unique	6.18579	High	0	1.08e-10
FALSE	High	[R].SPPADSDGSPPHR.[R]	1xTMT6plex [N-Term]; 3xPhospho [S1(100); S6(100); S9(100)]	Q6K542 3xPhospho [S227(100); S232(100); S235(100)]	3.76001e-08	0	1	1	25	Q6K542	Q6K542 [227-239]	0	1788.66	High	High	High	High	High	High	High	High	High	S1(Phospho): 100; S6(Phospho): 100; S9(Phospho): 100	1	0.99166	0.876428	1.04962	0.960069	0.914749	1.17239	1.11508	1.2872	25	25	25	25	25	25	25	25	25	Unique	6.52409	High	0	1.941e-09
FALSE	High	[R].SPPADSDGSPPHR.[R]	1xTMT6plex [N-Term]; 2xPhospho [S1(100); S9(100)]	Q6K542 2xPhospho [S227(100); S]	8.24925e-05	0	1	1	5	Q6K542	Q6K542 [227-239]	0	1708.69	High	High	High	High	High	High	High	High	High	S1(Phospho): 100; S9(Phospho): 100	1	1.20278	1.13201	1.29785	1.05256	1.01639	1.41008	1.29564	1.4585	5	5	5	5	5	5	5	5	5	Unique	4.03093	High	0	9.142e-06
FALSE	High	[K].QDVQTDDSEGDR.[A]	1xTMT6plex [N-Term]; 2xPhospho [T5(100); S8(100)]	Q84R70 2xPhospho [T568(100); S571(100)]	0.000613624	0	1	1	3	Q84R70	Q84R70 [564-575]	0	1753.65	High	High	High	High	High	High	High	High	High	T5(Phospho): 100; S8(Phospho): 100	1	1.06677	0.998498	1.17862	0.92991	0.891294	1.02655	1.04401	1.25101	3	3	3	3	3	3	3	3	3	Unique	3.11526	High	0	0.000111
FALSE	High	[K].QDVQTDDSEGDR.[A]	1xTMT6plex [N-Term]; 1xPhospho [T5(100)]	Q84R70 1xPhospho [T568(100)]	0.000670499	0	1	1	1	Q84R70	Q84R70 [564-575]	0	1673.69	High	High	High	High	High	High	High	High	High	T5(Phospho): 100	1	1.36823	1.15585	1.53631	0.957053	1.22748	1.29928	1.04112	1.64066	1	1	1	1	1	1	1	1	1	Unique	2.9325	High	0	0.000106
FALSE	High	[K].EAGSFISPSGTSVDGPSFR.[E]	1xTMT6plex [N-Term]; 1xPhospho [S12(98.8)]	Q0JGG6 1xPhospho [S386(98.8)]	0.000430042	0	1	1	2	Q0JGG6	Q0JGG6 [375-393]	0	2207.02	High	High	High	High	High	High	High	High	High	S12(Phospho): 98.83	1	1.10027	0.89264	0.909863	1.12896	0.960682	1.1525	1.06706	1.34993	1	1	1	1	1	1	1	1	1	Unique	3.53592	High	0	6.3e-05
FALSE	High	[R].APPSPSPSTSSR.[A]	1xTMT6plex [N-Term]; 1xPhospho [S4(100)]	Q6Z901 1xPhospho [S33(100)]	0.000808603	0	1	1	8	Q6Z901	Q6Z901 [30-41]	0	1479.7	High	High	High	High	High	High	High	High	High	S4(Phospho): 100	1	1.14391	1.09387	0.98316	0.843453	0.788678	1.04454	1.00367	1.16897	8	8	8	8	8	8	8	8	8	Unique	2.86016	High	0	0.0001316
FALSE	High	[R].ASASPPPASASTGGDR.[K]	1xTMT6plex [N-Term]; 1xPhospho [S4(100)]	Q7EZ93 1xPhospho [S10(100)]	0.000235212	0	1	2	12	Q7EZ93	Q7EZ93 [7-22]	0	1737.8	High	High	High	High	High	High	High	High	High	S4(Phospho): 99.5	1	1.0079	0.952722	1.00173	0.875623	0.842429	1.12882	1.09203	1.20637	12	12	12	12	12	12	12	12	12	Unique	3.38365	High	0	3.105e-05
FALSE	High	[K].HTVDSPDDSQQK.[Q]	2xTMT6plex [N-Term; K12]; 2xPhospho [S5(100); S9(100)]	Q10NF9 2xPhospho [S623(100); S627(100)]	1.93425e-05	0	1	2	4	Q10NF9	Q10NF9 [619-630]	0	1974.86	High	High	High	High	High	High	High	High	High	S5(Phospho): 100; S9(Phospho): 100	1	1.09925	1.07861	0.994888	0.889697	0.876635	1.06064	0.991181	1.32339	4	4	4	4	4	4	4	4	4	Unique	4.84437	High	0	1.681e-06
FALSE	High	[R].AGSRSPGSDDKE.[-]	2xTMT6plex [N-Term; K11]; 3xPhospho [S3(100); S5(100); S8(100)]	Q6ZDR7 3xPhospho [S280(100); S282(100); S285(100)]	0.000812813	0	1	1	6	Q6ZDR7	Q6ZDR7 [278-289]	2	1903.76	High	High	High	High	High	High	High	High	High	S3(Phospho): 100; S5(Phospho): 100; S8(Phospho): 100	1	0.97542	0.655175	0.731018	0.772076	0.978273	0.562518	0.704968	1.19672	6	6	6	6	6	6	6	6	6	Unique	4.05043	High	0	0.0001323
FALSE	High	[R].AAASEADEEER.[K]	1xTMT6plex [N-Term]; 1xPhospho [S4(100)]	Q5N8I8 1xPhospho [S88(100)]	8.03469e-05	0	1	1	8	Q5N8I8	Q5N8I8 [85-95]	0	1486.63	High	High	High	High	High	High	High	High	High	S4(Phospho): 100	1	1.08301	1.00994	1.27439	1.15108	1.18546	2.13075	1.87383	2.27883	8	8	8	8	8	8	8	8	8	Unique	4.20855	High	0	8.828e-06
FALSE	High	[R].STSRSPPPK.[K]	2xTMT6plex [N-Term; K9]; 3xPhospho [S1(75); T2(99.6); S3(99.6)]	Q6YW54 3xPhospho [T36(99); S37(99); S39(99)]	0.00110307	0	1	1	39	Q6YW54	Q6YW54 [35-43]	1	1654.74	High	High	High	High	High	High	High	High	High	S1(Phospho): 66.76; T2(Phospho): 66.76; S3(Phospho): 66.76; S5(Phospho): 99.72	1	1.03429	0.904085	0.982183	0.973138	0.901067	1.0578	1.06417	1.09297	21	21	21	21	21	21	21	21	21	Unique	3.68149	High	0	0.0002449
FALSE	High	[R].LFENDTSIFSSGTDK.[K]	2xTMT6plex [N-Term; K15]; 1xPhospho [S10(99.5)]	Q7X776 1xPhospho [S358(99.5)]	4.48445e-06	0	1	1	2	Q7X776	Q7X776 [349-363]	0	2199.06	High	High	High	High	High	High	High	High	High	S10(Phospho): 99.5	1	0.818094	0.878335	0.843407	0.716785	0.713426	0.745289	0.813498	0.831189	1	1	1	1	1	1	1	1	1	Unique	3.88914	High	0	3.063e-07
FALSE	High	[R].RSQEEDEVEER.[V]	1xTMT6plex [N-Term]; 1xPhospho [S2(100)]	Q6Z2V3 1xPhospho [S124(100)]	0.0010422	0	1	2	5	Q6Z2V3	Q6Z2V3 [123-133]	1	1714.75	High	High	High	High	High	High	High	High	High	S2(Phospho): 100	1	1.01704	0.978471	1.06428	0.943984	0.958728	1.23394	1.0757	1.28599	5	5	5	5	5	5	5	5	5	Unique	3.08752	High	0	0.0001773
FALSE	High	[R].SSSFSSSENVR.[A]	1xTMT6plex [N-Term]; 1xPhospho [S2(99.2)]	B7E741 1xPhospho [S90(100)]	7.04264e-05	0	1	1	13	B7E741	B7E741 [88-98]	0	1495.66	High	High	High	High	High	High	High	High	High	S3(Phospho): 100	1	1.15508	0.978471	1.10337	0.990228	0.938204	0.960258	0.982537	1.07126	7	7	7	7	7	7	7	7	7	Unique	4.02361	High	0	7.581e-06
FALSE	High	[R].RADSDDEDDPVESFLR.[A]	1xTMT6plex [N-Term]; 1xPhospho [S4(100)]	Q10MH8 1xPhospho [S99(100)]	0.000266825	0	1	1	1	Q10MH8	Q10MH8 [96-111]	1	2174.94	High	High	High	High	High	High	High	High	High	S4(Phospho): 100	1	0.99572	0.765802	0.95775	0.889697	0.764246	1.08526	0.94604	1.12192	1	1	1	1	1	1	1	1	1	Unique	3.93695	High	0	3.588e-05
FALSE	High	[R].SYSRSPPPPR.[E]	1xTMT6plex [N-Term]; 2xPhospho [S1(100); S/Y]	Q6K9C3 2xPhospho [S168(100); S172(99.3)]	0.000892373	0	1	1	55	Q6K9C3	Q6K9C3 [168-177]	1	1532.69	High	High	High	High	High	High	High	High	High	S1(Phospho): 99.29; S5(Phospho): 99.29	1	1.02008	0.967027	1.02812	0.956048	0.875657	1.09947	1.0661	1.13157	27	27	27	27	27	27	27	27	27	Unique	3.49688	High	0	0.0003314
FALSE	High	[R].IAATSSGGGSSR.[T]	1xTMT6plex [N-Term]; 1xPhospho [S6(99.5)]	Q5ZDH9 1xPhospho [S148(99.5)]	0.000145724	0	1	1	21	Q5ZDH9	Q5ZDH9 [143-154]	0	1359.65	High	High	High	High	High	High	High	High	High	S6(Phospho): 99.43	1	1.20278	0.98324	1.29003	1.10986	1.02127	1.42808	1.41858	1.31977	12	12	12	12	12	12	12	12	12	Unique	3.47328	High	0	1.768e-05
FALSE	High	[R].STDGVGGGCSPQR.[G]	1xTMT6plex [N-Term]; 1xCarbamidomethyl [C9]; 1xPhospho [S10(100)]	Q5N7K6 1xPhospho [S100(100)]	6.10035e-07	0	1	1	6	Q5N7K6	Q5N7K6 [91-103]	0	1586.68	High	High	High	High	High	High	High	High	High	S10(Phospho): 100	1	1.0211	1.02997	1.19035	1.09679	1.02714	1.1061	1.0805	1.06281	6	6	6	6	6	6	6	6	6	Unique	4.42995	High	0	2.992e-08
FALSE	High	[K].GQEEENGDSDKDDDEMVGDEDDSDLDQAWK.[M]	3xTMT6plex [N-Term; K11; K30]; 1xPhospho [S9(100)]	Q6Z4S6 1xPhospho [S175(100)]	2.87865e-06	0	1	1	1	Q6Z4S6	Q6Z4S6 [167-196]	1	4153.74	High	High	High	High	High	High	High	High	High	S9(Phospho): 100	1	1.09012	1.01376	1.04375	0.926894	1.19426	1.11083	1.26107	1.10986	1	1	1	1	1	1	1	1	1	Unique	5.07026	High	0	1.827e-07
FALSE	High	[K].HTVDSPDDSQQK.[Q]	2xTMT6plex [N-Term; K12]; 1xPhospho [S5(100)]	Q10NF9 1xPhospho [S623(100)]	3.8139e-07	0	1	2	11	Q10NF9	Q10NF9 [619-630]	0	1894.89	High	High	High	High	High	High	High	High	High	S5(Phospho): 100	1	1.09925	1.10245	1.20696	1.13901	1.06818	1.40819	1.38112	1.30047	11	11	11	11	11	11	11	11	11	Unique	5.23629	High	0	1.735e-08
FALSE	High	[K].TESSPGASGSK.[G]	2xTMT6plex [N-Term; K11]; 2xPhospho [S8(99.2); S/T]	Q5NAI9 2xPhospho [S215(100); S/T]	0.000184672	0	1	1	7	Q5NAI9	Q5NAI9 [208-218]	0	1625.72	High	High	High	High	High	High	High	High	High	S3(Phospho): 100; S4(Phospho): 99.38	1	1.07794	1.11008	1.00662	0.984196	0.932341	1.07579	1.02864	1.10021	7	7	7	7	7	7	7	7	7	Unique	3.93094	High	0	2.335e-05
FALSE	High	[R].ASASPPPASASTGGDR.[K]	1xTMT6plex [N-Term]; 2xPhospho [S2(100); S4(100)]	Q7EZ93 2xPhospho [S8(100); S10(100)]	1.67155e-06	0	1	2	37	Q7EZ93	Q7EZ93 [7-22]	0	1817.77	High	High	High	High	High	High	High	High	High	S2(Phospho): 100; S4(Phospho): 100	1	1.10433	1.13487	1.18155	1.08674	1.02323	1.5957	1.48005	1.7613	37	37	37	37	37	37	37	37	37	Unique	5.05052	High	0	1.863e-07
FALSE	High	[K].GSLGNLDVVATK.[N]	2xTMT6plex [N-Term; K12]; 1xPhospho [S2(100)]	Q10PC3 1xPhospho [S148(100)]	0.000462742	0	1	1	1	Q10PC3	Q10PC3 [147-158]	0	1711.94	High	High	High	High	High	High	High	High	High	S2(Phospho): 100	1	1.07692	1.01662	0.940159	1.25261	0.98316	1.02939	1.2044	1.23412	1	1	1	1	1	1	1	1	1	Unique	3.35913	High	0	6.858e-05
FALSE	High	[K].TSPSDEEDVDDGHHHGGGGGSGK.[E]	2xTMT6plex [N-Term; K23]; 1xPhospho [S4(99.7)]	Q6ESZ1 1xPhospho [S68(97.8)]	2.60159e-12	0	1	1	8	Q6ESZ1	Q6ESZ1 [65-87]	0	2772.19	High	High	High	High	High	High	High	High	High	S4(Phospho): 99.7	1	1.25455	1.17016	1.54901	1.33203	1.17666	1.8296	1.75762	1.81679	3	3	3	3	3	3	3	3	3	Unique	7.75352	High	0	1.65e-14
FALSE	High	[R].DDDSESDEEAAPR.[R]	1xTMT6plex [N-Term]; 2xPhospho [S4(100); S6(100)]	A0A0P0X0B1 2xPhospho [S672(100); S674(100)]	3.10443e-07	0	1	2	4	A0A0P0X0B1	A0A0P0X0B1 [669-681]	0	1824.64	High	High	High	High	High	High	High	High	High	S4(Phospho): 100; S6(Phospho): 100	1	1.01805	0.905038	1.21282	0.885676	1.00368	1.52751	1.3427	1.81438	4	4	4	4	4	4	4	4	4	Unique	4.85975	High	0	1.362e-08
FALSE	High	[R].SAEPEAAAAAAASPASPDEDADVDGLDDDEGGGMESK.[I]	2xTMT6plex [N-Term; K37]; 2xPhospho [S13(100); S16(100)]	Q2QX87 2xPhospho [S79(100); S82(100)]	3.34467e-14	0	1	1	2	Q2QX87	Q2QX87 [67-103]	0	4136.71	High	High	High	High	High	High	High	High	High	S13(Phospho): 100; S16(Phospho): 100	1	1.23323	1.1425	1.11314	1.0425	0.961659	1.16765	0.938356	1.06884	2	2	2	2	2	2	2	2	2	Unique	8.02075	High	0	1.032e-16
FALSE	High	[R].TTTEESEEGVR.[G]	1xTMT6plex [N-Term]; 1xPhospho [S6(100)]	Q5ZBN0 1xPhospho [S661(100)]	0.000215103	0	1	1	3	Q5ZBN0	Q5ZBN0 [656-666]	0	1546.68	High	High	High	High	High	High	High	High	High	S6(Phospho): 100	1	1.09012	1.22547	1.13073	0.905782	0.914749	1.04833	1.0392	1.08453	3	3	3	3	3	3	3	3	3	Unique	3.31818	High	0	7.246e-05
FALSE	High	[R].SAEPEAAAAAAASPASPDEDADVDGLDDDEGGGMESK.[I]	2xTMT6plex [N-Term; K37]; 1xOxidation [M34(100)]; 2xPhospho [S13(100); S16(100)]	Q2QX87 2xPhospho [S79(100); S82(100)]	8.6561e-08	0	1	1	1	Q2QX87	Q2QX87 [67-103]	0	4152.7	High	High	High	High	High	High	High	High	High	S13(Phospho): 100; S16(Phospho): 100; M34(Oxidation): 100	1	1.15	0.961305	0.944068	1.14605	1.32912	1.4527	1.53479	1.91933	1	1	1	1	1	1	1	1	1	Unique	4.81472	High	0	3.074e-09
FALSE	High	[R].ERRSESLAK.[R]	2xTMT6plex [N-Term; K9]; 2xPhospho [S4(100); S6(100)]	Q8LH97 2xPhospho [S229(100); S231(100)]	0.000660098	0	1	2	19	Q8LH97	Q8LH97 [226-234]	2	1693.84	High	High	High	High	High	High	High	High	High	S4(Phospho): 100; S6(Phospho): 100	1	1.01704	1.23406	0.478875	0.549903	0.764246	1.55213	1.78547	1.29685	19	19	19	19	19	19	19	19	19	Unique	4.2191	High	0	0.000104
FALSE	High	[R].SFGSHEDEDR.[S]	1xTMT6plex [N-Term]; 2xPhospho [S1(100); S4(100)]	Q10NL9 2xPhospho [S968(100); S971(100)]	8.6957e-05	0	1	2	9	Q10NL9	Q10NL9 [968-977]	0	1567.57	High	High	High	High	High	High	High	High	High	S1(Phospho): 100; S4(Phospho): 100	1	1.19568	1.03378	0.982183	0.895729	0.840475	1.05022	0.948921	1.08935	9	9	9	9	9	9	9	9	9	Unique	4.17989	High	0	1.795e-05
FALSE	High	[R].SFGSHEDEDR.[S]	1xTMT6plex [N-Term]; 1xPhospho [S1(100)]	Q10NL9 1xPhospho [S968(100)]	2.13821e-05	0	1	2	15	Q10NL9	Q10NL9 [968-977]	0	1487.6	High	High	High	High	High	High	High	High	High	S1(Phospho): 100	1	1.15812	1.0128	1.03496	0.867581	0.862953	1.05685	1.01615	1.15811	15	15	15	15	15	15	15	15	15	Unique	4.75036	High	0	1.885e-06
FALSE	High	[K].AYEHDSDHEDIDR.[A]	1xTMT6plex [N-Term]; 1xPhospho [S6(100)]	Q5KQN3 1xPhospho [S40(100)]	7.74802e-08	0	1	1	3	Q5KQN3	Q5KQN3 [35-47]	0	1910.78	High	High	High	High	High	High	High	High	High	S6(Phospho): 100	1	1.12158	0.967027	1.01346	0.976154	0.834611	1.30402	1.26491	1.45368	3	3	3	3	3	3	3	3	3	Unique	5.57785	High	0	2.695e-09
FALSE	High	[R].REDSDDPEEEDPDER.[Q]	1xTMT6plex [N-Term]; 1xPhospho [S4(100)]	Q33B10 1xPhospho [S37(100)]	9.12519e-08	0	1	1	14	Q33B10	Q33B10 [34-48]	1	2141.83	High	High	High	High	High	High	High	High	High	S4(Phospho): 100	1	1.10534	1.04046	1.15321	1.12896	1.15321	1.51331	1.35135	2.03394	14	14	14	14	14	14	14	14	14	Unique	5.80996	High	0	3.274e-09
FALSE	High	[R].SPPPDSDGSPPHR.[R]	1xTMT6plex [N-Term]; 3xPhospho [S1(100); S6(100); S9(100)]	Q2QNB0 3xPhospho [S225(100); S230(100); S233(100)]	0.000123773	0	1	2	12	Q2QNB0	Q2QNB0 [225-237]	0	1814.68	High	High	High	High	High	High	High	High	High	S1(Phospho): 100; S6(Phospho): 100; S9(Phospho): 100	1	1.12767	1.10054	1.2011	1.0787	1.04766	1.3902	1.35327	1.56828	12	12	12	12	12	12	12	12	12	Unique	4.269	High	0	1.465e-05
FALSE	High	[K].STTSPSSASK.[A]	2xTMT6plex [N-Term; K10]; 1xPhospho [T/S]		0.0016791	0	1	1	12	Q8LN25	Q8LN25 [169-178]	0	1490.75	High	High	High	High	High	High	High	High	High	S4(Phospho): 100	1	1.02313	1.09768	1.11509	1.03346	1.07503	1.09947	1.09875	1.09297	7	7	7	7	7	7	7	7	7	Unique	3.20919	High	0	0.000312
FALSE	High	[K].STGGSPPASGSAK.[G]	2xTMT6plex [N-Term; K13]; 1xPhospho [S5(100)]	A0A0P0X7K6 1xPhospho [S881(99.1)]	3.59294e-06	0	1	2	19	A0A0P0X7K6	A0A0P0X7K6 [877-889]	0	1641.82	High	High	High	High	High	High	High	High	High	S5(Phospho): 100	1	1.09925	1.04141	1.11216	0.970122	0.908885	1.07769	0.996943	1.08573	17	17	17	17	17	17	17	17	17	Unique	4.10543	High	0	2.362e-07
FALSE	High	[R].SFDEQSWSELSHR.[Q]	1xTMT6plex [N-Term]; 2xPhospho [S1(100); S6(100)]	Q53PH5 2xPhospho [S37(100); S42(100)]	0.000751859	0	1	1	1	Q53PH5	Q53PH5 [37-49]	0	1996.8	High	High	High	High	High	High	High	High	High	S1(Phospho): 100; S6(Phospho): 100	1	0.96527	1.01185	0.999774	0.976154	0.945045	1.10326	1.13141	1.07246	1	1	1	1	1	1	1	1	1	Unique	3.35276	High	0	0.0001206
FALSE	High	[R].LLSEPAPGISASPSEENMR.[Y]	1xTMT6plex [N-Term]; 1xPhospho [S12(99.1)]	Q8W0I1 1xPhospho [S28(99.1)]	0.000787871	0	1	1	2	Q8W0I1	Q8W0I1 [17-35]	0	2294.09	High	High	High	High	High	High	High	High	High	S12(Phospho): 99.08	1	1.09215	0.98324	0.952864	0.877634	0.837543	0.967834	1.10643	1.08453	1	1	1	1	1	1	1	1	1	Unique	3.09843	High	0	0.0001274
FALSE	High	[R].DDSDEDDDNVQER.[E]	1xTMT6plex [N-Term]; 1xPhospho [S3(100)]	Q7F1M0 1xPhospho [S13(100)]	0.00136189	0	1	2	2	Q7F1M0	Q7F1M0 [11-23]	0	1860.7	High	High	High	High	High	High	High	High	High	S3(Phospho): 100	1	1.0485	0.98324	0.990978	0.654455	0.733949	1.4205	1.26395	2.07737	2	2	2	2	2	2	2	2	2	Unique	2.21546	High	0.0001839	0.001801
FALSE	High	[R].GRDSDDDDFR.[D]	1xTMT6plex [N-Term]; 1xPhospho [S4(100)]	Q6L4R9 1xPhospho [S507(100)]	0.000264036	0	1	2	12	Q6L4R9	Q6L4R9 [504-513]	1	1506.61	High	High	High	High	High	High	High	High	High	S4(Phospho): 100	1	1.07997	0.843049	1.00173	0.837421	0.86393	1.04075	1.01327	1.16777	12	12	12	12	12	12	12	12	12	Unique	3.98946	High	0	0.0001581
FALSE	High	[R].WLPNVQDCEENSTHSAK.[N]	2xTMT6plex [N-Term; K17]; 1xCarbamidomethyl [C8]; 2xPhospho [S15(100); S/T]	Q10CF1 2xPhospho [S287(100); S/T]	3.8403e-05	0	1	1	3	Q10CF1	Q10CF1 [273-289]	0	2633.15	High	High	High	High	High	High	High	High	High	S12(Phospho): 50; T13(Phospho): 50; S15(Phospho): 100	1	1.12057	1.08338	0.975342	1.03748	1.07112	1.36084	1.25146	1.4199	2	2	2	2	2	2	2	2	2	Unique	4.30271	High	0	3.357e-05
FALSE	High	[K].GGAGGGGGGGGGFGSR.[G]	1xTMT6plex [N-Term]; 1xPhospho [S15(100)]	Q6YUR8 1xPhospho [S94(100)]	1.43597e-10	0	1	1	7	Q6YUR8	Q6YUR8 [80-95]	0	1473.64	High	High	High	High	High	High	High	High	High	S15(Phospho): 100	1	1.2241	0.791551	1.13562	0.928904	0.787701	0.815367	0.751069	0.816712	7	7	7	7	7	7	7	7	7	Unique	6.67273	High	0	1.765e-12
FALSE	High	[R].SEFSGEVSSDEVVK.[D]	2xTMT6plex [N-Term; K14]; 2xPhospho [S4(100); S8(99.5)]	Q6Z9D2 2xPhospho [S726(100); S730(99.5)]	1.26153e-05	0	1	1	1	Q6Z9D2	Q6Z9D2 [723-736]	0	2116.95	High	High	High	High	High	High	High	High	High	S4(Phospho): 100; S8(Phospho): 99.54	1	1.35909	1.14536	1.18253	0.913825	0.812133	0.777487	0.928752	0.928904	1	1	1	1	1	1	1	1	1	Unique	4.27441	High	0	1.023e-06
FALSE	High	[K].SAEESTGEK.[K]	2xTMT6plex [N-Term; K9]; 1xPhospho [S1(100)]	Q53JF7 1xPhospho [S124(100)]	0.000147267	0	1	1	14	Q53JF7	Q53JF7 [124-132]	0	1475.7	High	High	High	High	High	High	High	High	High	S1(Phospho): 100	1	1.27383	0.972749	1.24019	1.02843	0.824838	0.920484	0.841351	0.831189	11	11	11	11	11	11	11	11	11	Unique	3.45792	High	0	0.0001094
FALSE	High	[K].VVAQHEEREEDDDSD.[-]	1xTMT6plex [N-Term]; 1xPhospho [S14(100)]	Q9LGR1 1xPhospho [S250(100)]	1.63928e-07	0	1	1	6	Q9LGR1	Q9LGR1 [237-251]	1	2081.85	High	High	High	High	High	High	High	High	High	S14(Phospho): 100	1	1.58239	1.00422	1.53045	1.28478	1.35453	1.86843	1.84118	2.0074	6	6	6	6	6	6	6	6	6	Unique	4.92548	High	0	6.484e-09
FALSE	High	[K].AVTSPGNACR.[Y]	1xTMT6plex [N-Term]; 1xCarbamidomethyl [C9]; 1xPhospho [S4(99.5)]		0.00117342	0	1	1	5	Q5JNI5	Q5JNI5 [320-329]	0	1341.62	High	High	High	High	High	High	High	High	High	S4(Phospho): 99.47	1	1.19872	1.19686	1.65163	1.46775	1.59202	1.53603	1.70095	1.78422	4	4	4	4	4	4	4	4	4	Unique	3.23894	High	0	0.0002044
FALSE	High	[K].DNQNINGGLANLAEEGSLR.[R]	1xTMT6plex [N-Term]; 1xPhospho [S17(100)]	Q2QNK1 1xPhospho [S285(100)]	0.00070268	0	1	1	1	Q2QNK1	Q2QNK1 [269-287]	0	2294.1	High	High	High	High	High	High	High	High	High	S17(Phospho): 100	1	1.05358	1.04523	1.16494	1.20235	1.12194	0.902491	1.10259	1.20637	1	1	1	1	1	1	1	1	1	Unique	3.38343	High	0	0.0001115
FALSE	High	[R].EESSSSNGSPESNDK.[S]	2xTMT6plex [N-Term; K15]; 1xPhospho [S9(100)]	Q0IZX5 1xPhospho [S682(99.3)]	5.36578e-06	0	1	1	3	Q0IZX5	Q0IZX5 [674-688]	0	2091.91	High	High	High	High	High	High	High	High	High	S9(Phospho): 100	1	1.11143	1.24359	1.06818	1.00229	1.0203	1.07863	0.897057	1.08573	3	3	3	3	3	3	3	3	3	Unique	4.32596	High	0	3.765e-07
FALSE	High	[R].SYNSEGDIQVAIR.[S]	1xTMT6plex [N-Term]; 2xPhospho [S1(100); S4(100)]	A3C592 2xPhospho [S273(100); S276(100)]	0.000350553	0	1	1	1	A3C592	A3C592 [273-285]	0	1840.81	High	High	High	High	High	High	High	High	High	S1(Phospho): 100; S4(Phospho): 100	1	0.968315	0.893594	0.860021	0.781124	0.799428	0.893968	0.833667	1.04713	1	1	1	1	1	1	1	1	1	Unique	3.51008	High	0	4.947e-05
FALSE	High	[K].TESSPGASGSK.[G]	2xTMT6plex [N-Term; K11]; 1xPhospho [S3(98.9)]	Q5NAI9 1xPhospho [S210(98.9)]	0.000414562	0	1	1	33	Q5NAI9	Q5NAI9 [208-218]	0	1545.76	High	High	High	High	High	High	High	High	High	S3(Phospho): 99.48	1	1.03429	1.05477	1.06134	0.939963	0.968501	1.072	1.02672	0.995255	13	13	13	13	13	13	13	13	13	Unique	3.94145	High	0.0001839	0.001219
FALSE	High	[K].NASPSNSTNSSASTNQQK.[I]	2xTMT6plex [N-Term; K18]; 1xPhospho [S3(100)]	A0A0N7KP48 1xPhospho [S182(100)]	4.75042e-09	0	1	1	7	A0A0N7KP48	A0A0N7KP48 [180-197]	0	2361.11	High	High	High	High	High	High	High	High	High	S3(Phospho): 100	1	0.96527	0.937463	1.11119	1.06965	1.20794	1.10041	1.02864	1.26789	5	5	5	5	5	5	5	5	5	Unique	6.12257	High	0	1.047e-10
FALSE	High	[R].SASSAGDSDGK.[S]	2xTMT6plex [N-Term; K11]; 1xPhospho [S3(100)]	A0A0P0XUJ0 1xPhospho [S169(100)]	8.03469e-05	0	1	1	15	A0A0P0XUJ0	A0A0P0XUJ0 [162-172]	0	1519.7	High	High	High	High	High	High	High	High	High	S3(Phospho): 99.57	1	1.17132	0.937463	1.23335	1.09478	1.06037	1.82487	1.76338	1.71184	9	9	9	9	9	9	9	9	9	Unique	4.10325	High	0	8.834e-06
FALSE	High	[R].SYSRSPPPAR.[A]	1xTMT6plex [N-Term]; 3xPhospho [S1(100); S3(100); S5(100)]	Q6K9C3 3xPhospho [S156(100); S158(100); S160(100)]	0.000558587	0	1	1	40	Q6K9C3	Q6K9C3 [156-165]	1	1586.64	High	High	High	High	High	High	High	High	High	S1(Phospho): 100; S3(Phospho): 100; S5(Phospho): 100	1	1.04444	0.952722	1.01541	0.88266	0.940159	1.08053	1.06129	1.16173	29	29	29	29	29	29	29	29	29	Unique	4.25648	High	0	0.0001378
FALSE	High	[R].QDSVGSEDWYFPK.[W]	2xTMT6plex [N-Term; K13]; 1xPhospho [S6(100)]	Q8W3C9 1xPhospho [S722(100)]	0.000626563	0	1	1	1	Q8W3C9	Q8W3C9 [717-729]	0	2095.98	High	High	High	High	High	High	High	High	High	S6(Phospho): 100	1	0.994705	0.864984	0.705608	0.89774	0.677266	1.20742	1.11892	1.29685	1	1	1	1	1	1	1	1	1	Unique	3.14944	High	0	9.756e-05
FALSE	High	[K].REEHSGGDEEGSQNDFR.[N]	1xTMT6plex [N-Term]; 1xPhospho [S5(100)]	Q6K977 1xPhospho [S534(100)]	3.8201e-05	0	1	2	2	Q6K977	Q6K977 [530-546]	1	2257.93	High	High	High	High	High	High	High	High	High	S5(Phospho): 100	1	1.21192	1.16444	1.32424	1.09478	0.97241	1.43565	1.24282	1.40904	2	2	2	2	2	2	2	2	2	Unique	3.81362	High	0	3.722e-06
FALSE	High	[K].KHDDNDSDDEK.[K]	3xTMT6plex [N-Term; K1; K11]; 1xPhospho [S7(100)]	Q7XXQ8 1xPhospho [S360(100)]	3.52949e-05	0	1	1	14	Q7XXQ8	Q7XXQ8 [354-364]	1	2084.97	High	High	High	High	High	High	High	High	High	S7(Phospho): 100	1	1.08301	1.01471	1.14246	0.904777	0.975342	1.36368	1.23033	1.42352	14	14	14	14	14	14	14	14	14	Unique	4.0813	High	0	4.095e-06
FALSE	High	[R].EASPGYDRPR.[S]	1xTMT6plex [N-Term]; 1xPhospho [S3(100)]	Q6Z725 1xPhospho [S262(100)]	0.000315638	0	1	2	7	Q6Z725	Q6Z725 [260-269]	0	1456.68	High	High	High	High	High	High	High	High	High	S3(Phospho): 100	1	1.12361	0.981332	1.11412	0.921867	0.901067	1.04454	1.04593	1.08211	7	7	7	7	7	7	7	7	7	Unique	3.60399	High	0	4.373e-05
FALSE	High	[K].AETVVSPKSPAKPDQPLDLDSELAK.[L]	4xTMT6plex [N-Term; K8; K12; K25]; 2xPhospho [S9(98.8); S/T]	A0A0P0UYD8 2xPhospho [S390(100); S393(100)]	1.65667e-07	0	1	1	3	A0A0P0UYD8	A0A0P0UYD8 [385-409]	1	3711.97	High	High	High	High	High	High	High	High	High	S6(Phospho): 98.07; S9(Phospho): 99.96	1	0.947	0.946046	0.952864	0.920862	0.974364	1.3097	1.12564	1.25221	3	3	3	3	3	3	3	3	3	Unique	6.17643	High	0	6.534e-09
FALSE	High	[R].VGSAGNTAGSSRPR.[K]	1xTMT6plex [N-Term]; 2xPhospho [S3(100); S10(100)]	Q2QX93 2xPhospho [S6(100); S13(100)]	2.40582e-06	0	1	1	6	Q2QX93	Q2QX93 [4-17]	0	1705.76	High	High	High	High	High	High	High	High	High	S3(Phospho): 100; S10(Phospho): 100	1	1.01501	0.78106	0.859043	0.845464	0.809201	0.720667	0.725137	0.831189	6	6	6	6	6	6	6	6	6	Unique	5.60388	High	0	1.48e-07
FALSE	High	[R].VGSAGNTAGSSRPR.[K]	1xTMT6plex [N-Term]; 1xPhospho [S3(100)]	Q2QX93 1xPhospho [S6(100)]	0.0012938	0	1	1	3	Q2QX93	Q2QX93 [4-17]	0	1625.8	High	High	High	High	High	High	High	High	High	S3(Phospho): 99.99	1	0.96121	0.819207	0.805292	0.863559	0.789655	0.91859	0.957565	0.951825	3	3	3	3	3	3	3	3	3	Unique	3.42826	High	0	0.0002448
FALSE	High	[K].DVVDDGKLSERTISDELPQEPAK.[L]	3xTMT6plex [N-Term; K7; K23]; 3xPhospho [S9(100); T12(100); S14(100)]	Q6K624 3xPhospho [S275(100); T278(100); S280(100)]	0.000573366	0	1	1	1	Q6K624	Q6K624 [267-289]	2	3468.66	High	High	High	High	High	High	High	High	High	S9(Phospho): 100; T12(Phospho): 100; S14(Phospho): 100	1	1.38447	1.22166	1.13171	1.37526	1.20501	1.22731	1.38592	1.39698	1	1	1	1	1	1	1	1	1	Unique	4.10771	High	0	8.799e-05
FALSE	High	[K].DQSPPSEQTIDNGIPLVATER.[V]	1xTMT6plex [N-Term]; 1xPhospho [S3(100)]	Q10N72 1xPhospho [S722(100)]	5.35383e-05	0	1	1	1	Q10N72	Q10N72 [720-740]	0	2576.24	High	High	High	High	High	High	High	High	High	S3(Phospho): 99.99	1	1.02516	0.930788	0.942114	0.769061	0.859043	0.821996	0.962367	0.869792	1	1	1	1	1	1	1	1	1	Unique	4.09007	High	0	5.522e-06
FALSE	High	[R].SASSAGDSDGK.[S]	2xTMT6plex [N-Term; K11]; 2xPhospho [S3(100); S8(100)]	A0A0P0XUJ0 2xPhospho [S165(100); S169(100)]	0.00147057	0	1	1	6	A0A0P0XUJ0	A0A0P0XUJ0 [162-172]	0	1599.67	High	High	High	High	High	High	High	High	High	S3(Phospho): 49.84; S4(Phospho): 49.84; S8(Phospho): 100	1	1.14391	0.890733	0.966546	0.852501	0.907908	1.17996	1.05937	1.21481	6	6	6	6	6	6	6	6	6	Unique	3.30308	High	0	0.0002663
FALSE	High	[R].HDTDDNNNAAAADSPK.[K]	2xTMT6plex [N-Term; K16]; 1xPhospho [S14(100)]	Q9FXQ3 1xPhospho [S37(100)]	8.03579e-11	0	1	3	1	Q9FXQ3	Q9FXQ3 [24-39]	0	2193.98	High	High	High	High	High	High	High	High	High	S14(Phospho): 100	1	0.98963	0.823976	1.10337	1.1169	0.798451	1.79456	1.60491	1.6286	1	1	1	1	1	1	1	1	1	Unique	6.51667	High	0	8.994e-13
FALSE	High	[R].ACASQGSAAPGR.[R]	1xTMT6plex [N-Term]; 1xCarbamidomethyl [C2]; 2xPhospho [S4(100); S7(100)]	A0A0P0XX67 2xPhospho [S171(100); S174(100)]	8.24925e-05	0	1	1	3	A0A0P0XX67	A0A0P0XX67 [168-179]	0	1521.61	High	High	High	High	High	High	High	High	High	S4(Phospho): 100; S7(Phospho): 100	1	0.90234	0.988962	1.11705	1.01536	1.11021	1.59001	1.3283	1.74562	3	3	3	3	3	3	3	3	3	Unique	3.83812	High	0	9.137e-06
FALSE	High	[K].HAVSEGTK.[A]	2xTMT6plex [N-Term; K8]; 1xPhospho [S4(100)]	A3AGM4 1xPhospho [S140(100)]; Q94JE1 1xPhospho [S143(100)]; Q7GBK0 1xPhospho [S141(100)]	0.00161208	0	3	16	3	A3AGM4; Q94JE1; Q7GBK0	A3AGM4 [137-144]; Q94JE1 [140-147]; Q7GBK0 [138-145]	0	1366.71	High	High	High	High	High	High	High	High	High	S4(Phospho): 100	1	1.01196	1.12057	1.03789	1.02039	1.06525	1.01897	1.01231	0.989223	3	3	3	3	3	3	3	3	3	Not Unique	3.15242	High	6.595e-05	0.0004897
FALSE	High	[K].HDDNDSDDEKK.[Q]	3xTMT6plex [N-Term; K10; K11]; 1xPhospho [S6(100)]	Q7XXQ8 1xPhospho [S360(100)]	1.72226e-05	0	1	1	19	Q7XXQ8	Q7XXQ8 [355-365]	1	2084.97	High	High	High	High	High	High	High	High	High	S6(Phospho): 100	1	1.01298	0.970842	1.05059	0.843453	0.879567	1.26993	1.08626	1.31374	18	18	18	18	18	18	18	18	18	Unique	5.15248	High	0	2.304e-06
FALSE	High	[R].SGDGSGGQNNNLSDEESR.[Q]	1xTMT6plex [N-Term]; 1xPhospho [S13(100)]	Q5VMI1 1xPhospho [S236(100)]	3.86055e-08	0	1	1	3	Q5VMI1	Q5VMI1 [224-241]	0	2131.87	High	High	High	High	High	High	High	High	High	S13(Phospho): 100	1	0.97542	0.85354	1.08675	0.969117	1.01248	1.31254	1.29276	1.68047	3	3	3	3	3	3	3	3	3	Unique	4.33192	High	0	4.239e-08
FALSE	High	[R].DSAEGTSNSK.[A]	2xTMT6plex [N-Term; K10]; 1xPhospho [T/S]	Q10MG9 1xPhospho [S637(100)]	0.000930133	0	1	2	2	Q10MG9	Q10MG9 [629-638]	0	1533.72	High	High	High	High	High	High	High	High	High	S9(Phospho): 99.99	1	1.19771	1.21308	1.10434	0.886682	1.02616	1.2008	0.997904	1.11589	2	2	2	2	2	2	2	2	2	Unique	3.29523	High	0	0.0001557
FALSE	High	[R].LPGVDGDESDSDSDGSEYDDER.[S]	1xTMT6plex [N-Term]; 2xPhospho [S16(98.7); S/Y]	Q6ER21 2xPhospho [S136(98.2); S139(100)]	6.37137e-05	0	1	1	6	Q6ER21	Q6ER21 [124-145]	0	2747.99	High	High	High	High	High	High	High	High	High	S11(Phospho): 97.65; S16(Phospho): 100	1	1.15914	1.03188	1.11705	0.991234	1.05841	1.21879	1.18135	1.38009	4	4	4	4	4	4	4	4	4	Unique	2.91834	High	0	2.699e-05
FALSE	High	[K].EFDDVSEQYVAVTK.[K]	2xTMT6plex [N-Term; K14]; 1xPhospho [S6(100)]	Q9LI02 1xPhospho [S183(100)]	0.0005219	0	1	1	1	Q9LI02	Q9LI02 [178-191]	0	2168.06	High	High	High	High	High	High	High	High	High	S6(Phospho): 100	1	1.30124	1.31321	1.33303	1.27775	1.2871	1.31917	1.33886	1.55863	1	1	1	1	1	1	1	1	1	Unique	3.74321	High	0	7.889e-05
FALSE	High	[K].MVMSESEEEGDDDEEGDQDGGAWEK.[K]	2xTMT6plex [N-Term; K25]; 1xPhospho [S4(100)]	Q84LG6 1xPhospho [S212(100)]	3.53651e-06	0	1	1	4	Q84LG6	Q84LG6 [209-233]	0	3312.31	High	High	High	High	High	High	High	High	High	S4(Phospho): 100	1	1.2647	1.14918	0.938204	1.05557	0.93625	1.24531	1.10643	1.11348	2	2	2	2	2	2	2	2	2	Unique	4.08134	High	0	1.059e-06
FALSE	High	[K].MVMSESEEEGDDDEEGDQDGGAWEK.[K]	2xTMT6plex [N-Term; K25]; 2xPhospho [S4(100); S6(100)]	Q84LG6 2xPhospho [S212(100); S214(100)]	8.02293e-10	0	1	1	6	Q84LG6	Q84LG6 [209-233]	0	3392.28	High	High	High	High	High	High	High	High	High	S4(Phospho): 100; S6(Phospho): 100	1	1.13985	1.01185	1.07014	1.0978	1.08284	1.30875	1.2409	1.38491	6	6	6	6	6	6	6	6	6	Unique	6.77384	High	0	1.314e-11
FALSE	High	[R].ENGAESDSEEER.[R]	1xTMT6plex [N-Term]; 2xPhospho [S6(100); S8(100)]	Q7X923 2xPhospho [S1019(100); S1021(100)]	0.000150401	0	1	1	2	Q7X923	Q7X923 [1014-1025]	0	1740.62	High	High	High	High	High	High	High	High	High	S6(Phospho): 100; S8(Phospho): 100	1	0.766329	0.755311	0.7447	0.8334	0.882498	0.830519	0.991181	1.01576	2	2	2	2	2	2	2	2	2	Unique	2.96237	High	0	1.841e-05
FALSE	High	[K].MVMSESEEEGDDDEEGDQDGGAWEK.[K]	2xTMT6plex [N-Term; K25]; 1xOxidation [M1(100)]; 2xPhospho [S4(100); S6(100)]	Q84LG6 2xPhospho [S212(100); S214(100)]	2.56726e-07	0	1	1	7	Q84LG6	Q84LG6 [209-233]	0	3408.27	High	High	High	High	High	High	High	High	High	M3(Oxidation): 99.97; S4(Phospho): 100; S6(Phospho): 100	1	1.02414	0.909807	1.11998	0.985202	0.953841	1.20269	1.22841	1.2872	5	5	5	5	5	5	5	5	5	Unique	6.11719	High	0	1.09e-08
FALSE	High	[K].EVLSSEPEEIGNDEK.[A]	2xTMT6plex [N-Term; K15]; 2xPhospho [S4(100); S5(100)]	Q7XQE6 2xPhospho [S1413(100); S1414(100)]	7.574e-07	0	1	2	1	Q7XQE6	Q7XQE6 [1410-1424]	0	2293.03	High	High	High	High	High	High	High	High	High	S4(Phospho): 100; S5(Phospho): 100	1	1.09925	0.933649	0.800406	0.778108	0.728086	0.891127	0.841351	0.955445	1	1	1	1	1	1	1	1	1	Unique	5.73541	High	0	3.86e-08
FALSE	High	[R].ADSSHCIPGR.[QK]	1xTMT6plex [N-Term]; 1xCarbamidomethyl [C6]; 1xPhospho [S3(100)]	O82118 1xPhospho [S291(100)]	0.00162031	0	1	2	7	O82118	O82118 [289-298]	0	1408.62	High	High	High	High	High	High	High	High	High	S3(Phospho): 99.41	1	1.19263	1.10626	1.1278	1.09076	1.09653	1.20742	1.11412	1.32701	5	5	5	5	5	5	5	5	5	Unique	3.28322	High	0	0.0003091
FALSE	High	[R].GEEEEEGRDGEEESAQSPR.[I]	1xTMT6plex [N-Term]; 1xPhospho [S17(100)]	A0A0P0WPA0 1xPhospho [S79(100)]	6.1977e-07	0	1	1	4	A0A0P0WPA0	A0A0P0WPA0 [63-81]	1	2428.99	High	High	High	High	High	High	High	High	High	S17(Phospho): 100	1	1.15508	1.0109	1.24117	1.03446	1.01639	1.48679	1.57033	1.77698	4	4	4	4	4	4	4	4	4	Unique	4.5442	High	0	6.571e-07
FALSE	High	[R].AEWLETGSFNGR.[T]	1xTMT6plex [N-Term]; 1xPhospho [S8(100)]	Q69IL3 1xPhospho [S207(100)]	0.000276817	0	1	1	2	Q69IL3	Q69IL3 [200-211]	0	1675.77	High	High	High	High	High	High	High	High	High	S8(Phospho): 100	1	1.1835	0.980379	1.16103	1.00129	1.05353	1.1203	1.18327	1.13399	2	2	2	2	2	2	2	2	2	Unique	3.14568	High	0	0.0001908
FALSE	High	[K].AAHSATNVSPK.[G]	2xTMT6plex [N-Term; K11]; 1xPhospho [S9(100)]	Q69X98 1xPhospho [S235(100)]	1.59659e-07	0	1	1	4	Q69X98	Q69X98 [227-237]	0	1620.85	High	High	High	High	High	High	High	High	High	S9(Phospho): 100	1	1.20684	1.21975	0.820929	0.689641	0.632311	0.675211	0.620448	0.640582	4	4	4	4	4	4	4	4	4	Unique	5.18867	High	0	6.286e-09
FALSE	High	[K].HVGATAASASA.[-]	1xTMT6plex [N-Term]; 1xPhospho [S10(99.7)]		0.00010457	0	1	1	6	Q0D840	Q0D840 [112-122]	0	1251.59	High	High	High	High	High	High	High	High	High	S10(Phospho): 99.74	1	1.10737	0.99373	1.25583	1.13499	1.01346	1.44607	1.3792	1.50434	6	6	6	6	6	6	6	6	6	Unique	3.89451	High	0	1.378e-05
FALSE	High	[R].SDSTASGDSPK.[E]	2xTMT6plex [N-Term; K11]; 2xPhospho [S3(99.3); S9(100)]	Q10KI0 2xPhospho [S502(100); S505(100)]	1.07683e-05	0	1	2	29	Q10KI0	Q10KI0 [497-507]	0	1669.71	High	High	High	High	High	High	High	High	High	S3(Phospho): 99.27; S9(Phospho): 100	1	1.10128	0.901224	0.923545	0.713769	0.809201	0.990562	0.963328	1.02662	25	25	25	25	25	25	25	25	25	Unique	4.89521	High	0	2.945e-05
FALSE	High	[R].SDSTASGDSPK.[E]	2xTMT6plex [N-Term; K11]; 1xPhospho [S3(99.3)]	Q10KI0 1xPhospho [S505(99.6)]	6.62684e-06	0	1	2	37	Q10KI0	Q10KI0 [497-507]	0	1589.75	High	High	High	High	High	High	High	High	High	S9(Phospho): 100	1	1.05662	1.01948	1.06525	0.883666	0.925499	1.1222	1.02864	1.13399	24	24	24	24	24	24	24	24	24	Unique	5.03046	High	0	4.84e-07
FALSE	High	[R].EGEDYGSDHGGDDIEDSLQSPLISR.[Q]	1xTMT6plex [N-Term]; 1xPhospho [S7(100)]	Q336W8 1xPhospho [S357(100)]	2.03528e-07	0	1	4	4	Q336W8	Q336W8 [351-375]	0	3000.29	High	High	High	High	High	High	High	High	High	S7(Phospho): 100	1	0.89016	0.768663	0.875657	0.934936	0.805292	1.07769	1.10643	1.2317	2	2	2	2	2	2	2	2	2	Unique	4.98169	High	0	3.416e-08
FALSE	High	[K].TAANGSPGGNDSPGGSDR.[K]	1xTMT6plex [N-Term]; 2xPhospho [S6(100); S12(100)]	Q0JF58 2xPhospho [S155(100); S161(100)]	4.44464e-07	0	1	1	7	Q0JF58	Q0JF58 [150-167]	0	2005.79	High	High	High	High	High	High	High	High	High	S6(Phospho): 100; S12(Phospho): 100	1	1.02313	1.00422	1.01834	0.898745	0.914749	1.01045	0.948921	0.922873	7	7	7	7	7	7	7	7	7	Unique	5.12114	High	0	2.075e-08
FALSE	High	[R].GGSRSPRPSESPEA.[-]	1xTMT6plex [N-Term]; 3xPhospho [S5(98.6); S9(100); S11(100)]	Q0DL70 3xPhospho [S314(100); S318(100); S320(100)]	0.00110877	0	1	2	11	Q0DL70	Q0DL70 [310-323]	1	1882.73	High	High	High	High	High	High	High	High	High	S3(Phospho): 100; S5(Phospho): 100; S9(Phospho): 50; S11(Phospho): 50	1	1.10534	1.02425	1.26267	1.34812	1.04766	1.30307	1.24762	1.36561	11	11	11	11	11	11	11	11	11	Unique	3.11784	High	0	0.0001915
FALSE	High	[R].EGEDYGSDHGGDDIEDSLQSPLISR.[Q]	1xTMT6plex [N-Term]; 2xPhospho [S7(100); S20(100)]	Q336W8 2xPhospho [S357(100); S370(100)]	5.25986e-10	0	1	4	2	Q336W8	Q336W8 [351-375]	0	3080.26	High	High	High	High	High	High	High	High	High	S7(Phospho): 100; S20(Phospho): 100	1	0.731819	0.651361	0.599083	0.687631	0.717335	0.661006	0.893215	1.18345	2	2	2	2	2	2	2	2	2	Unique	6.96803	High	0	8.019e-12
FALSE	High	[R].EGEDYGSDHGGDDIEDSLQSPLISR.[Q]	1xTMT6plex [N-Term]; 3xPhospho [S7(100); S20(100); S24(100)]	Q336W8 3xPhospho [S357(100); S370(100); S374(100)]	7.58206e-05	0	1	4	1	Q336W8	Q336W8 [351-375]	0	3160.23	High	High	High	High	High	High	High	High	High	S7(Phospho): 100; S20(Phospho): 99.98; S24(Phospho): 100	1	0.885085	0.655175	0.665539	0.622286	0.806269	1.06537	0.912424	1.32339	1	1	1	1	1	1	1	1	1	Unique	4.54222	High	0	8.269e-06
FALSE	High	[R].SPGSGSKDEMFFDSR.[A]	2xTMT6plex [N-Term; K7]; 2xPhospho [S1(100); S]	Q5JJJ8 2xPhospho [S60(100); S]	0.000127076	0	1	1	2	Q5JJJ8	Q5JJJ8 [60-74]	1	2264.97	High	High	High	High	High	High	High	High	High	S1(Phospho): 100; S4(Phospho): 50; S6(Phospho): 50	1	1.07286	1.1425	1.08871	0.936947	1.13855	1.63642	1.99389	1.87349	2	2	2	2	2	2	2	2	2	Unique	3.90476	High	0	0.0001325
FALSE	High	[K].KEETDSDDER.[K]	2xTMT6plex [N-Term; K1]; 2xPhospho [T4(100); S6(100)]	Q10P22 2xPhospho [T128(100); S130(100)]	0.0011495	0	1	1	4	Q10P22	Q10P22 [125-134]	1	1841.76	High	High	High	High	High	High	High	High	High	T4(Phospho): 100; S6(Phospho): 100	1	1.13985	0.984193	1.05255	0.989223	0.984137	0.864611	0.875927	0.866173	4	4	4	4	4	4	4	4	4	Unique	3.04156	High	0	0.000199
FALSE	High	[K].EDLSGNDSDRGQQTR.[R]	1xTMT6plex [N-Term]; 1xPhospho [S8(100)]	Q10Q04 1xPhospho [S361(100)]	4.16508e-06	0	1	1	4	Q10Q04	Q10Q04 [354-368]	1	1986.87	High	High	High	High	High	High	High	High	High	S8(Phospho): 100	1	1.09215	0.971796	1.01834	0.949011	0.903999	1.03412	0.993101	1.18104	4	4	4	4	4	4	4	4	4	Unique	3.87568	High	0	2.815e-07
FALSE	High	[K].APATHQPVQVSSPSFR.[R]	1xTMT6plex [N-Term]; 1xPhospho [S14(99.4)]	Q0JD86 1xPhospho [S1083(99.4)]	0.000101851	0	1	1	15	Q0JD86	Q0JD86 [1070-1085]	0	2018.01	High	High	High	High	High	High	High	High	High	S14(Phospho): 99.44	1	1.21598	1.10912	0.978273	1.05457	0.974364	1.17523	1.16406	1.1931	7	7	7	7	7	7	7	7	7	Unique	4.13928	High	0	2.265e-05
FALSE	High	[K].DAESDDSSSGSNQRPADK.[G]	2xTMT6plex [N-Term; K18]; 1xPhospho [S4(100)]	Q2QP63 1xPhospho [S506(100)]	3.03465e-06	0	1	2	7	Q2QP63	Q2QP63 [503-520]	0	2404.07	High	High	High	High	High	High	High	High	High	S4(Phospho): 98.53	1	1.11143	0.950815	0.747632	0.610222	0.561945	0.762335	0.658866	0.767251	5	5	5	5	5	5	5	5	5	Unique	3.8089	High	0	3.267e-07
FALSE	High	[R].QPPQHSDDSDSDEEEDVAYYWK.[A]	2xTMT6plex [N-Term; K22]; 1xPhospho [S11(99.2)]	Q6Z7C7 1xPhospho [S334(99.2)]	1.40665e-07	0	1	2	2	Q6Z7C7	Q6Z7C7 [324-345]	0	3178.36	High	High	High	High	High	High	High	High	High	S11(Phospho): 99.18	1	1.18045	1.02806	0.996842	1.08372	0.821906	1.06443	0.977734	1.20154	1	1	1	1	1	1	1	1	1	Unique	4.96761	High	0	5.426e-09
FALSE	High	[R].RGGEGSPGAAAGK.[D]	2xTMT6plex [N-Term; K13]; 1xPhospho [S6(100)]	Q67WN5 1xPhospho [S58(100)]	1.08437e-06	0	1	2	13	Q67WN5	Q67WN5 [53-65]	1	1652.85	High	High	High	High	High	High	High	High	High	S6(Phospho): 100	1	0.735879	0.675202	0.5854	0.760013	0.751541	0.780328	1.07186	1.31374	13	13	13	13	13	13	13	13	13	Unique	5.27094	High	0	1.047e-07
FALSE	High	[K].AENLQFSTEQLVK.[E]	2xTMT6plex [N-Term; K13]; 1xPhospho [T8(99.5)]	Q5Z4M6 1xPhospho [T483(99.5)]	1.6863e-05	0	1	1	1	Q5Z4M6	Q5Z4M6 [476-488]	0	2045.07	High	High	High	High	High	High	High	High	High	T8(Phospho): 99.54	1	1.09722	1.00136	1.30762	1.19933	1.18155	1.51615	1.45508	1.61774	1	1	1	1	1	1	1	1	1	Unique	4.09516	High	0	1.435e-06
FALSE	High	[R].RRDDYSASPPR.[K]	1xTMT6plex [N-Term]; 2xPhospho [S6(100); S8(100)]	Q2QNB0 2xPhospho [S175(100); S177(100)]	0.00141885	0	1	2	14	Q2QNB0	Q2QNB0 [170-180]	2	1708.74	High	High	High	High	High	High	High	High	High	S6(Phospho): 100; S8(Phospho): 100	1	1.11042	1.06335	1.37408	1.28478	1.17178	1.61274	1.41282	1.6479	8	8	8	8	8	8	8	8	8	Unique	3.45303	High	0	0.000256
FALSE	High	[K].QGDASPGNQK.[E]	2xTMT6plex [N-Term; K10]; 1xPhospho [S5(100)]	Q60EN2 1xPhospho [S116(100)]	0.00161208	0	1	1	2	Q60EN2	Q60EN2 [112-121]	0	1539.76	High	High	High	High	High	High	High	High	High	S5(Phospho): 100	1	0.976435	0.634194	0.907908	0.724827	0.669448	0.866505	0.828865	1.10383	2	2	2	2	2	2	2	2	2	Unique	3.21335	High	0	0.0002986
FALSE	High	[R].DRDVDDADSDLEEEIQDVPR.[G]	1xTMT6plex [N-Term]; 1xPhospho [S9(100)]	Q8LH03 1xPhospho [S84(100)]	2.55254e-10	0	1	1	3	Q8LH03	Q8LH03 [76-95]	1	2640.15	High	High	High	High	High	High	High	High	High	S9(Phospho): 100	1	0.98354	1.11199	1.06818	1.22245	1.26658	1.43092	1.29372	1.42834	3	3	3	3	3	3	3	3	3	Unique	5.62753	High	0	3.449e-12
FALSE	High	[R].DLEILPTGNAALPSSPEKK.[Q]	3xTMT6plex [N-Term; K18; K19]; 1xPhospho [S15(100)]	A0A0P0XAP5 1xPhospho [S401(100)]	0.00132063	0	1	1	1	A0A0P0XAP5	A0A0P0XAP5 [387-405]	1	2747.52	High	High	High	High	High	High	High	High	High	S15(Phospho): 99.99	1	1.29718	1.2579	1.11705	1.18023	1.0203	1.2311	1.23609	1.10503	1	1	1	1	1	1	1	1	1	Unique	3.35017	High	0	0.0002354
FALSE	High	[K].HTVDSPDDSQQKQHTPSR.[V]	2xTMT6plex [N-Term; K12]; 3xPhospho [S5(98.7); S9(100); T15(98.7)]	Q10NF9 3xPhospho [S623(98.7); S627(100); T633(98.7)]	0.000259908	0	1	2	4	Q10NF9	Q10NF9 [619-636]	1	2761.18	High	High	High	High	High	High	High	High	High	S5(Phospho): 100; S9(Phospho): 100; T15(Phospho): 98.51	1	1.12869	1.13869	1.08578	1.05658	1.0115	1.34474	1.26299	1.4199	4	4	4	4	4	4	4	4	4	Unique	4.0782	High	0	3.48e-05
FALSE	High	[R].GRDSDDDDFRDR.[D]	1xTMT6plex [N-Term]; 1xPhospho [S4(100)]	Q6L4R9 1xPhospho [S507(100)]	1.15329e-05	0	1	2	14	Q6L4R9	Q6L4R9 [504-515]	2	1777.73	High	High	High	High	High	High	High	High	High	S4(Phospho): 100	1	1.09215	1.04046	1.27537	1.29785	1.1796	1.49626	1.35807	1.36078	14	14	14	14	14	14	14	14	14	Unique	5.08295	High	0	9.228e-07
FALSE	High	[R].FDADGDGRISPSELAAVTR.[A]	1xTMT6plex [N-Term]; 1xPhospho [S10(100)]	Q5ZCK5 1xPhospho [S44(100)]	6.93214e-05	0	1	1	2	Q5ZCK5	Q5ZCK5 [35-53]	1	2286.1	High	High	High	High	High	High	High	High	High	S10(Phospho): 99.99	1	1.06373	0.916482	0.997819	0.834406	0.913772	0.974463	1.01807	1.02783	2	2	2	2	2	2	2	2	2	Unique	3.80571	High	0	8.614e-06
FALSE	High	[K].DAESDDSSSGSNQRPADK.[G]	2xTMT6plex [N-Term; K18]; 2xPhospho [S4(100); S7(100)]	Q2QP63 2xPhospho [S506(100); S509(100)]	3.33052e-05	0	1	2	5	Q2QP63	Q2QP63 [503-520]	0	2484.03	High	High	High	High	High	High	High	High	High	S4(Phospho): 100; S7(Phospho): 99.99	1	1.00384	0.913621	1.02714	0.786151	0.83852	1.16955	1.11508	1.29202	5	5	5	5	5	5	5	5	5	Unique	4.40855	High	0	3.167e-06
FALSE	High	[K].GSLCFCDCGCFGQTPDSPRESR.[G]	1xTMT6plex [N-Term]; 4xCarbamidomethyl [C4; C6; C8; C10]; 2xPhospho [S17(100); S21(100)]	Q6K3D4 2xPhospho [S32(100); S36(100)]	0.00105302	0	1	1	1	Q6K3D4	Q6K3D4 [16-37]	1	2982.13	High	High	High	High	High	High	High	High	High	S17(Phospho): 100; S21(Phospho): 100	1	0.94091	1.00327	1.24898	1.15208	0.963614	1.25477	1.21785	1.47056	1	1	1	1	1	1	1	1	1	Unique	3.48512	High	0	0.0001798
FALSE	High	[R].EEPQGDSQDVASR.[L]	1xTMT6plex [N-Term]; 1xPhospho [S7(100)]	Q6ZLP6 1xPhospho [S761(100)]	1.3511e-05	0	1	1	12	Q6ZLP6	Q6ZLP6 [755-767]	0	1726.75	High	High	High	High	High	High	High	High	High	S7(Phospho): 100	1	0.735879	0.628472	0.694858	0.559956	0.564877	0.629755	0.642539	0.680392	12	12	12	12	12	12	12	12	12	Unique	3.75405	High	0	1.108e-06
FALSE	High	[R].SRSYSPAPR.[R]	1xTMT6plex [N-Term]; 3xPhospho [S1(100); S3(100); S5(100)]	Q6K542 3xPhospho [S163(100); S165(100); S167(100)]; Q2QNB0 3xPhospho [S161(100); S163(100); S165(100)]	0.001204	0	2	2	10	Q6K542; Q2QNB0	Q6K542 [163-171]; Q2QNB0 [161-169]	1	1489.58	High	High	High	High	High	High	High	High	High	S1(Phospho): 100; S3(Phospho): 100; S5(Phospho): 100	1	1.07895	0.963212	1.11021	1.05155	1.02225	1.13545	1.05265	1.20999	10	10	10	10	10	10	10	10	10	Not Unique	3.81083	High	0	0.000211
FALSE	High	[R].ELSRASLGGDDDLLAAQQHK.[A]	2xTMT6plex [N-Term; K20]; 2xPhospho [S3(100); S6(100)]	Q338G4 2xPhospho [S56(100); S59(100)]	1.38677e-08	0	1	1	1	Q338G4	Q338G4 [54-73]	1	2742.33	High	High	High	High	High	High	High	High	High	S3(Phospho): 100; S6(Phospho): 100	1	1.1703	0.968935	1.17373	0.970122	1.07503	1.23678	1.09779	1.29564	1	1	1	1	1	1	1	1	1	Unique	5.70521	High	0	3.643e-10
FALSE	High	[K].HIIEEVINSMSDDEEGEEDNAEDDKDK.[N]	3xTMT6plex [N-Term; K25; K27]; 1xOxidation [M10(100)]; 1xPhospho [S]		7.19278e-11	0	1	1	8	Q5JKH1	Q5JKH1 [467-493]	1	3888.75	High	High	High	High	High	High	High	High	High	S9(Phospho): 98.61; M10(Oxidation): 100	1	1.10331	1.08338	1.11998	1.137	1.12291	1.40251	1.15638	1.29685	4	4	4	4	4	4	4	4	4	Unique	6.89468	High	0	9.256e-13
FALSE	High	[K].KASGGGGDGEEEDEE.[-]	2xTMT6plex [N-Term; K1]; 1xPhospho [S3(100)]	A0A0P0Y445 1xPhospho [S197(100)]	4.77763e-06	0	1	2	2	A0A0P0Y445	A0A0P0Y445 [195-209]	1	2003.85	High	High	High	High	High	High	High	High	High	S3(Phospho): 100	1	0.92467	1.07193	1.11412	0.948005	0.945045	0.992456	1.03344	1.03024	2	2	2	2	2	2	2	2	2	Unique	4.38787	High	0	3.302e-07
FALSE	High	[K].TDGAEQEGEGSDK.[S]	2xTMT6plex [N-Term; K13]; 1xPhospho [S11(100)]	Q7XQK2 1xPhospho [S113(100)]	5.94148e-07	0	1	1	19	Q7XQK2	Q7XQK2 [103-115]	0	1860.83	High	High	High	High	High	High	High	High	High	S11(Phospho): 100	1	1.03835	1.1282	1.30274	0.864565	0.973387	1.05875	0.956604	1.03265	19	19	19	19	19	19	19	19	19	Unique	4.98178	High	0	3.411e-07
FALSE	High	[K].ELEDEGYSGDEWEDR.[K]	1xTMT6plex [N-Term]; 1xPhospho [S8(100)]	P0C506 1xPhospho [S228(100)]	2.59914e-05	0	1	1	3	P0C506	P0C506 [221-235]	0	2137.84	High	High	High	High	High	High	High	High	High	S8(Phospho): 100	1	1.15102	1.12724	1.13855	1.21944	1.10337	1.37315	1.19864	1.45729	2	2	2	2	2	2	2	2	2	Unique	3.78296	High	0	2.373e-06
FALSE	High	[K].HDQREDDDDTDEDEDDEEEEQK.[M]	2xTMT6plex [N-Term; K22]; 1xPhospho [T10(100)]	Q6Z3Y9 1xPhospho [T314(100)]	4.50194e-15	0	1	1	18	Q6Z3Y9	Q6Z3Y9 [305-326]	1	3274.27	High	High	High	High	High	High	High	High	High	T10(Phospho): 100	1	0.982525	1.2312	1.18351	1.46473	1.48158	1.49152	1.09203	1.21361	18	18	18	18	18	18	18	18	18	Unique	7.87171	High	0	1e-17
FALSE	High	[R].FSGVFSSSGSPR.[L]	1xTMT6plex [N-Term]; 1xPhospho [S10(100)]	Q6H657 1xPhospho [S406(100)]	6.64585e-05	0	1	1	1	Q6H657	Q6H657 [397-408]	0	1523.71	High	High	High	High	High	High	High	High	High	S10(Phospho): 100	1	1.10534	1.09101	1.13953	1.10182	1.08969	1.36084	1.2457	1.49952	1	1	1	1	1	1	1	1	1	Unique	3.39704	High	0	7.105e-06
FALSE	High	[K].GAQAQQPSPPPPQSQAPNR.[T]	1xTMT6plex [N-Term]; 1xPhospho [S8(100)]	Q5NBG8 1xPhospho [S96(100)]	5.8791e-07	0	1	1	6	Q5NBG8	Q5NBG8 [89-107]	0	2265.1	High	High	High	High	High	High	High	High	High	S8(Phospho): 100	1	1.1835	1.06812	1.40633	1.04351	1.09164	1.35421	1.16694	1.54657	6	6	6	6	6	6	6	6	6	Unique	4.79707	High	0	1.523e-07
FALSE	High	[K].KAAGSDSDDDEQGTQQK.[K]	3xTMT6plex [N-Term; K1; K17]; 2xPhospho [S5(100); S7(100)]	Q6K7Q7 2xPhospho [S132(100); S134(100)]	1.04791e-11	0	1	1	11	Q6K7Q7	Q6K7Q7 [128-144]	1	2627.18	High	High	High	High	High	High	High	High	High	S5(Phospho): 100; S7(Phospho): 100	1	1.0008	1.18351	1.2871	1.28378	1.1923	1.62979	1.33982	1.38129	11	11	11	11	11	11	11	11	11	Unique	7.65409	High	0	9.138e-14
FALSE	High	[K].KAAGSDSDDDEQGTQQK.[K]	3xTMT6plex [N-Term; K1; K17]; 1xPhospho [S5(99.7)]	Q6K7Q7 1xPhospho [S134(100)]	2.54846e-09	0	1	1	8	Q6K7Q7	Q6K7Q7 [128-144]	1	2547.22	High	High	High	High	High	High	High	High	High	S7(Phospho): 100	1	1.11651	1.29795	1.02421	0.902766	0.777928	1.13261	0.90378	0.934936	6	6	6	6	6	6	6	6	6	Unique	5.51707	High	0	5.039e-11
FALSE	High	[R].SGGDDEDDDDDDDDGDDDDDGRPSK.[R]	2xTMT6plex [N-Term; K25]; 1xPhospho [S1(100)]	A0A0P0V241 1xPhospho [S82(100)]	1.29982e-17	0	1	1	2	A0A0P0V241	A0A0P0V241 [82-106]	0	3195.16	High	High	High	High	High	High	High	High	High	S1(Phospho): 100	1	0.707459	0.573159	0.620583	0.737896	0.717335	0.589034	0.786605	0.948206	2	2	2	2	2	2	2	2	2	Unique	7.806	High	0	1.096e-20
FALSE	High	[R].STSTSVQNNQSGDGDVNTSSNK.[T]	2xTMT6plex [N-Term; K22]; 1xPhospho [S3(98.1)]	Q5N755 1xPhospho [S437(98.1)]	1.46731e-07	0	1	1	4	Q5N755	Q5N755 [435-456]	0	2765.26	High	High	High	High	High	High	High	High	High	S3(Phospho): 98.13	1	#VALUE!	#VALUE!	#VALUE!	#VALUE!	#VALUE!	#VALUE!	#VALUE!	#VALUE!										No Quan Values	4.32332	High	0	5.699e-09
FALSE	High	[R].DMSTAANGRSPSPR.[D]	1xTMT6plex [N-Term]; 2xPhospho [S10(100); S12(100)]	Q5ZCD9 2xPhospho [S302(100); S304(100)]	0.000317299	0	1	1	3	Q5ZCD9	Q5ZCD9 [293-306]	1	1835.77	High	High	High	High	High	High	High	High	High	S10(Phospho): 100; S12(Phospho): 100	1	1.27789	1.09387	1.35844	1.78744	1.17862	1.31444	1.14293	1.22326	3	3	3	3	3	3	3	3	3	Unique	3.75181	High	0	4.398e-05
FALSE	High	[R].YAAADMSEDLSEGEK.[G]	2xTMT6plex [N-Term; K15]; 2xPhospho [S7(100); S11(100)]	Q6ZHZ1 2xPhospho [S138(100); S142(100)]	8.78011e-07	0	1	1	3	Q6ZHZ1	Q6ZHZ1 [132-146]	0	2233.94	High	High	High	High	High	High	High	High	High	S7(Phospho): 100; S11(Phospho): 100	1	1.15	1.0519	1.05157	0.935942	0.926477	1.00287	1.11796	1.12192	3	3	3	3	3	3	3	3	3	Unique	5.28286	High	0	4.575e-08
FALSE	High	[K].RVDYSDDDDDFIVK.[L]	2xTMT6plex [N-Term; K14]; 1xPhospho [S5(100)]	Q5TKF1 1xPhospho [S149(100)]	0.000217377	0	1	1	2	Q5TKF1	Q5TKF1 [145-158]	1	2240.05	High	High	High	High	High	High	High	High	High	S5(Phospho): 100	1	0.876965	1.00804	1.0545	1.06362	0.933318	1.22826	1.15158	1.23532	1	1	1	1	1	1	1	1	1	Unique	3.81469	High	0	2.827e-05
FALSE	High	[R].GLEKEEEDYFNEDSDEEDSVR.[R]	2xTMT6plex [N-Term; K4]; 1xPhospho [S14(100)]	A0A0P0V256 1xPhospho [S712(100)]	5.65415e-09	0	1	1	1	A0A0P0V256	A0A0P0V256 [699-719]	1	3072.32	High	High	High	High	High	High	High	High	High	S14(Phospho): 100	1	1.00384	1.03569	1.09359	1.06764	0.903999	1.38167	1.29564	1.43196	1	1	1	1	1	1	1	1	1	Unique	4.94563	High	0	1.28e-10
FALSE	High	[R].KASPSSNDETAK.[T]	3xTMT6plex [N-Term; K1; K12]; 2xPhospho [S3(100); S5(99.2)]	Q5N861 2xPhospho [S326(100); S/T]	0.000184672	0	1	2	13	Q5N861	Q5N861 [324-335]	1	2082.01	High	High	High	High	High	High	High	High	High	S3(Phospho): 100; S5(Phospho): 50; S6(Phospho): 50	1	1.12767	1.21403	1.27733	1.14304	1.10923	1.68566	1.41858	1.64066	10	10	10	10	10	10	10	10	10	Unique	3.69999	High	0	2.332e-05
FALSE	High	[R].KASPSSNDETAK.[T]	3xTMT6plex [N-Term; K1; K12]; 1xPhospho [S3(100)]	Q5N861 1xPhospho [S326(100)]	3.22676e-05	0	1	2	10	Q5N861	Q5N861 [324-335]	1	2002.05	High	High	High	High	High	High	High	High	High	S3(Phospho): 100	1	1.12463	1.14346	1.21282	0.953032	0.934295	0.999085	0.981576	0.956651	9	9	9	9	9	9	9	9	9	Unique	3.65098	High	0	2.2e-05
FALSE	High	[K].DLAPQTEAFVDRPPTADGSGPPGGAVK.[G]	2xTMT6plex [N-Term; K27]; 1xPhospho [T15(100)]	Q6K4P1 1xPhospho [T169(100)]	3.28317e-09	0	1	1	1	Q6K4P1	Q6K4P1 [155-181]	0	3188.6	High	High	High	High	High	High	High	High	High	T15(Phospho): 100	1	1.12057	0.953676	1.12389	0.840437	0.975342	1.02276	1.20728	1.24739	1	1	1	1	1	1	1	1	1	Unique	4.96531	High	0	6.784e-11
FALSE	High	[R].SNSVRSTSANENLR.[S]	1xTMT6plex [N-Term]; 2xPhospho [S3(100); S6(100)]	Q10RS7 2xPhospho [S262(99.4); S/T]	0.000183703	0	1	2	6	Q10RS7	Q10RS7 [260-273]	1	1923.85	High	High	High	High	High	High	High	High	High	S3(Phospho): 99.99; S6(Phospho): 100	1	1.07997	1.00136	1.02421	0.828374	0.724176	0.941318	0.890334	1.02541	6	6	6	6	6	6	6	6	6	Unique	4.14382	High	0	2.319e-05
FALSE	High	[K].KAEEESGAEK.[Q]	3xTMT6plex [N-Term; K1; K10]; 1xPhospho [S6(100)]	Q10H93 1xPhospho [S197(100)]	0.00102618	0	1	2	4	Q10H93	Q10H93 [192-201]	1	1844.96	High	High	High	High	High	High	High	High	High	S6(Phospho): 100	1	0.92467	1.00804	1.15321	1.12393	0.968501	1.55876	1.41858	1.56345	4	4	4	4	4	4	4	4	4	Unique	3.18348	High	0	0.000175
FALSE	High	[R].EEGYGSDGNDDKR.[R]	2xTMT6plex [N-Term; K12]; 1xPhospho [S6(100)]	Q6ZDM0 1xPhospho [S91(100)]	0.000107929	0	1	1	9	Q6ZDM0	Q6ZDM0 [86-98]	1	1979.87	High	High	High	High	High	High	High	High	High	S6(Phospho): 100	1	0.99369	1.00041	0.999774	0.834406	0.891294	1.1203	1.09395	1.30288	9	9	9	9	9	9	9	9	9	Unique	3.53596	High	0	4.521e-05
FALSE	High	[K].ASPSSNDETAK.[T]	2xTMT6plex [N-Term; K11]; 1xPhospho [S2(100)]	Q5N861 1xPhospho [S326(100)]	6.23841e-05	0	1	2	8	Q5N861	Q5N861 [325-335]	0	1644.79	High	High	High	High	High	High	High	High	High	S2(Phospho): 100	1	1.01704	0.951768	1.00368	1.05155	0.995865	0.959311	1.1122	1.20275	7	7	7	7	7	7	7	7	7	Unique	4.35125	High	0	1.544e-05
FALSE	High	[K].SSTTETPSSPK.[H]	2xTMT6plex [N-Term; K11]; 1xPhospho [S9(100)]	Q7X7E9 1xPhospho [S1189(100)]	0.000626563	0	1	2	3	Q7X7E9	Q7X7E9 [1181-1191]	0	1659.82	High	High	High	High	High	High	High	High	High	S9(Phospho): 100	1	1.08098	1.07098	0.973387	0.888692	0.938204	1.05496	0.958525	1.03024	2	2	2	2	2	2	2	2	2	Unique	3.1336	High	0	9.779e-05
FALSE	High	[R].AAGGSLGHGSPNQGDK.[K]	2xTMT6plex [N-Term; K16]; 1xPhospho [S10(100)]	Q6YSJ5 1xPhospho [S134(100)]	2.73068e-06	0	1	1	2	Q6YSJ5	Q6YSJ5 [125-140]	0	1990.97	High	High	High	High	High	High	High	High	High	S10(Phospho): 100	1	1.12463	1.00422	0.952864	0.813294	0.790633	1.08147	1.16886	1.05195	2	2	2	2	2	2	2	2	2	Unique	4.25247	High	0	1.72e-07
FALSE	High	[R].DSNNEASGTSLTR.[S]	1xTMT6plex [N-Term]; 1xPhospho [T/S]		0.000206242	0	1	2	5	Q8H3P9	Q8H3P9 [686-698]	0	1660.74	High	High	High	High	High	High	High	High	High	S10(Phospho): 99.51	1	0.99978	0.720979	0.816042	0.839432	0.767178	1.13356	1.06706	1.2124	3	3	3	3	3	3	3	3	3	Unique	2.6261	High	0	2.665e-05
FALSE	High	[K].LGHDSDSDHDDNK.[K]	2xTMT6plex [N-Term; K13]; 2xPhospho [S5(100); S7(100)]	A0A0P0WEK8 2xPhospho [S6(100); S8(100)]	2.79838e-05	0	1	1	4	A0A0P0WEK8	A0A0P0WEK8 [2-14]	0	2072.84	High	High	High	High	High	High	High	High	High	S5(Phospho): 100; S7(Phospho): 100	1	0.691219	0.515939	0.576605	0.730859	0.620583	0.866505	0.995983	1.44885	4	4	4	4	4	4	4	4	4	Unique	4.31236	High	0	2.579e-06
FALSE	High	[R].SHEDKGSSGEEVVPAR.[K]	2xTMT6plex [N-Term; K5]; 2xPhospho [S7(100); S8(100)]	Q5Z9Y9 2xPhospho [S22(100); S23(100)]	7.28716e-06	0	1	1	1	Q5Z9Y9	Q5Z9Y9 [16-31]	1	2302.05	High	High	High	High	High	High	High	High	High	S7(Phospho): 100; S8(Phospho): 100	1	1.02211	1.1034	1.85393	1.49791	1.52165	1.80119	1.85942	1.80352	1	1	1	1	1	1	1	1	1	Unique	4.7586	High	0	5.394e-07
FALSE	High	[K].VESSVVATEQSNAAVSPSGIDNK.[E]	2xTMT6plex [N-Term; K23]; 1xPhospho [S16(100)]	Q10F25 1xPhospho [S275(100)]	0.000224344	0	1	1	1	Q10F25	Q10F25 [260-282]	0	2827.41	High	High	High	High	High	High	High	High	High	S16(Phospho): 99.99	1	1.02414	0.855447	1.34183	1.12594	1.1405	1.17049	0.964288	1.14364	1	1	1	1	1	1	1	1	1	Unique	3.53056	High	0	2.931e-05
FALSE	High	[K].IRSDGSDFDESIEK.[C]	2xTMT6plex [N-Term; K14]; 2xPhospho [S3(100); S6(100)]	Q6Z8D4 2xPhospho [S239(100); S242(100)]	4.0483e-05	0	1	1	1	Q6Z8D4	Q6Z8D4 [237-250]	1	2215.99	High	High	High	High	High	High	High	High	High	S3(Phospho): 100; S6(Phospho): 100	1	1.22511	1.01376	1.15028	1.04351	0.975342	1.27656	1.16598	1.50555	1	1	1	1	1	1	1	1	1	Unique	3.80652	High	0	3.975e-06
FALSE	High	[R].GAAAMDVDSGSGGNESD.[-]	1xTMT6plex [N-Term]; 2xPhospho [S9(100); S11(100)]	Q9LGR0 2xPhospho [S633(100); S635(100)]	3.95098e-06	0	1	1	27	Q9LGR0	Q9LGR0 [625-641]	0	1928.68	High	High	High	High	High	High	High	High	High	S9(Phospho): 100; S11(Phospho): 100	1	1.082	1.04904	1.1708	1.16214	1.076	1.47259	1.33118	1.51037	20	20	20	20	20	20	20	20	20	Unique	4.29501	High	0	2.649e-07
FALSE	High	[R].GAAAMDVDSGSGGNESD.[-]	1xTMT6plex [N-Term]; 1xPhospho [S9(100)]	Q9LGR0 1xPhospho [S633(100)]	8.55146e-07	0	1	1	20	Q9LGR0	Q9LGR0 [625-641]	0	1848.72	High	High	High	High	High	High	High	High	High	S16(Phospho): 99.4	1	1.12869	1.00422	1.10532	1.0224	1.00271	1.41576	1.22265	1.44282	13	13	13	13	13	13	13	13	13	Unique	4.04956	High	0	4.43e-08
FALSE	High	[R].ASGSSSSSEEGEDDVAAQR.[M]	1xTMT6plex [N-Term]; 2xPhospho [S6(98.2); S8(99.1)]	Q337E2 2xPhospho [S81(98.2); S83(99.1)]	2.5362e-06	0	1	1	2	Q337E2	Q337E2 [76-94]	0	2257.87	High	High	High	High	High	High	High	High	High	S6(Phospho): 98.2; S8(Phospho): 99.1	1	1.0008	0.750543	1.18057	0.96208	0.883476	1.3561	0.955644	1.21964	1	1	1	1	1	1	1	1	1	Unique	3.74207	High	0	1.58e-07
FALSE	High	[R].ASGSSSSSEEGEDDVAAQR.[M]	1xTMT6plex [N-Term]; 1xPhospho [S7(98.6)]	Q337E2 1xPhospho [S82(98.1)]	5.29019e-07	0	1	1	9	Q337E2	Q337E2 [76-94]	0	2177.9	High	High	High	High	High	High	High	High	High	S7(Phospho): 98.58	1	1.07997	1.06526	1.03984	1.01536	1.1278	1.56255	1.35231	1.91692	3	3	3	3	3	3	3	3	3	Unique	4.0208	High	0	8.313e-08
FALSE	High	[R].MDSDGASGQGSFGR.[K]	1xTMT6plex [N-Term]; 1xPhospho [S11(100)]	Q5ZA32 1xPhospho [S698(100)]	6.18746e-06	0	1	2	5	Q5ZA32	Q5ZA32 [688-701]	0	1680.69	High	High	High	High	High	High	High	High	High	S11(Phospho): 100	1	1.15203	0.841142	1.11216	1.00832	0.935272	1.17523	1.11124	1.13761	5	5	5	5	5	5	5	5	5	Unique	3.49214	High	0	4.442e-07
FALSE	High	[R].DRSFDNSDQASVSDMATNLK.[H]	2xTMT6plex [N-Term; K20]; 1xPhospho [S3(100)]	Q0DEQ5 1xPhospho [S299(100)]	6.4203e-06	0	1	1	1	Q0DEQ5	Q0DEQ5 [297-316]	1	2739.27	High	High	High	High	High	High	High	High	High	S3(Phospho): 100	1	1.21801	0.875474	1.00075	0.846469	0.875657	1.27277	1.04593	1.25945	1	1	1	1	1	1	1	1	1	Unique	3.80437	High	0	4.663e-07
FALSE	High	[R].QSNSDGALDTMAR.[R]	1xTMT6plex [N-Term]; 1xPhospho [S4(100)]	Q654U5 1xPhospho [S722(100)]	7.90061e-07	0	1	1	5	Q654U5	Q654U5 [719-731]	0	1674.74	High	High	High	High	High	High	High	High	High	S4(Phospho): 100	1	1.14087	0.830652	1.00271	0.968111	0.792587	1.18091	1.31293	1.24377	5	5	5	5	5	5	5	5	5	Unique	4.42601	High	0	4.035e-08
FALSE	High	[R].SLNTLQNLHDEASDDERPVSD.[-]	1xTMT6plex [N-Term]; 2xPhospho [S13(100); S20(100)]	Q5W770 2xPhospho [S626(100); S633(100)]	1.85763e-06	0	1	1	1	Q5W770	Q5W770 [614-634]	0	2744.17	High	High	High	High	High	High	High	High	High	S13(Phospho): 100; S20(Phospho): 100	1	0.89016	0.828744	1.27537	1.10785	1.39167	1.34379	1.52615	1.49831	1	1	1	1	1	1	1	1	1	Unique	3.98138	High	0	1.096e-07
FALSE	High	[R].DPDSDEAEQPDTPSR.[R]	1xTMT6plex [N-Term]; 1xPhospho [S4(100)]	A0A0P0WPA0 1xPhospho [S14(100)]	0.000432299	0	1	1	3	A0A0P0WPA0	A0A0P0WPA0 [11-25]	0	1967.81	High	High	High	High	High	High	High	High	High	T12(Phospho): 99.41	1	0.94294	0.995637	1.05255	1.05557	1.09555	1.51994	1.49926	1.91933	3	3	3	3	3	3	3	3	3	Unique	3.20322	High	0	6.308e-05
FALSE	High	[R].SHEDKGSSGEEVVPAR.[K]	2xTMT6plex [N-Term; K5]; 1xPhospho [S1(98.9)]	Q5Z9Y9 1xPhospho [S16(98.9)]	0.00161208	0	1	1	1	Q5Z9Y9	Q5Z9Y9 [16-31]	1	2222.09	High	High	High	High	High	High	High	High	High	S1(Phospho): 98.93	1	0.925685	1.10054	1.04766	0.923878	1.04375	1.55403	1.30044	1.33304	1	1	1	1	1	1	1	1	1	Unique	3.05539	High	0	0.0002988
FALSE	High	[R].ALMMESGSDTEAAPKPK.[T]	3xTMT6plex [N-Term; K15; K17]; 2xPhospho [S6(100); S/T]	A0A0N7KQK8 2xPhospho [S357(100); S/T]	6.73258e-06	0	1	1	2	A0A0N7KQK8	A0A0N7KQK8 [352-368]	0	2610.26	High	High	High	High	High	High	High	High	High	S6(Phospho): 100; S8(Phospho): 100	1	1.07591	1.04332	1.18253	1.00229	0.879567	1.28034	1.15446	1.24497	2	2	2	2	2	2	2	2	2	Unique	4.10329	High	0	4.915e-07
FALSE	High	[R].KQSKLSFSITSPK.[V]	4xTMT6plex [N-Term; K1; K4; K13]; 2xPhospho [S3(100); S6(99.2)]	Q0IZR7 2xPhospho [S319(100); S322(99.2)]	0.000288693	0	1	1	1	Q0IZR7	Q0IZR7 [317-329]	2	2527.41	High	High	High	High	High	High	High	High	High	S3(Phospho): 100; S6(Phospho): 99.23	1	1.00689	0.961305	1.20892	1.14404	1.06623	1.44133	1.21112	1.21119	1	1	1	1	1	1	1	1	1	Unique	3.49769	High	0	3.932e-05
FALSE	High	[R].SHSNASSGMGVAPDIR.[D]	1xTMT6plex [N-Term]; 1xOxidation [M9(100)]; 1xPhospho [S3(100)]	Q9AY76 1xPhospho [S8(100)]	1.78371e-07	0	1	1	9	Q9AY76	Q9AY76 [6-21]	0	1910.86	High	High	High	High	High	High	High	High	High	S3(Phospho): 99.99; M9(Oxidation): 100	1	1.16117	1.00231	1.19132	1.10785	1.05646	1.58244	1.44547	1.6093	6	6	6	6	6	6	6	6	6	Unique	5.62656	High	0	7.156e-09
FALSE	High	[R].SHSNASSGMGVAPDIR.[D]	1xTMT6plex [N-Term]; 1xPhospho [S3(100)]		3.71282e-10	0	1	1	9	Q9AY76	Q9AY76 [6-21]	0	1894.87	High	High	High	High	High	High	High	High	High	S3(Phospho): 100	1	1.11752	0.996591	0.99391	1.1179	0.913772	1.26803	1.14485	1.18345	5	5	5	5	5	5	5	5	5	Unique	6.64513	High	0	5.359e-12
FALSE	High	[K].NMEATSPTSASSSR.[E]	1xTMT6plex [N-Term]; 1xPhospho [S/T]		0.000123773	0	1	1	5	Q5JJJ9	Q5JJJ9 [129-142]	0	1734.76	High	High	High	High	High	High	High	High	High	S6(Phospho): 99.37	1	0.99572	0.909807	0.931363	0.889697	1.12975	1.42524	1.31581	1.53209	3	3	3	3	3	3	3	3	3	Unique	2.65397	High	0	1.468e-05
[truncated: 1,596 more rows]
