# Supplementary material for: The Phosphoproteomic Response of Rice Seedlings to Cadmium Stress
Source: Int J Mol Sci. 2017 Sep 27;18(10):2055. doi: 10.3390/ijms18102055 (PMC5666737; doi:10.3390/ijms18102055)
Supplement: Supplementary file 1 [file ijms-18-02055-s001.zip › Additional file 2-Table S2.xlsx]

## Sheet: Table S2
Additional file 2: Table S2: Complete list of proteins identified in iTRAQ study																			Found in Sample: [S5] F1: 128C, Sample	Found in Sample: [S6] F1: 129N, Sample	Found in Sample: [S7] F1: 129C, Sample	Found in Sample: [S8] F1: 130N, Sample	Found in Sample: [S9] F1: 130C, Sample	Modifications	Abundance Ratio: (F1, 126) / (F1, 126)	Abundance Ratio: (F1, 127N) / (F1, 126)	Abundance Ratio: (F1, 127C) / (F1, 126)	Abundance Ratio: (F1, 128N) / (F1, 126)	Abundance Ratio: (F1, 128C) / (F1, 126)	Abundance Ratio: (F1, 129N) / (F1, 126)	Abundance Ratio: (F1, 129C) / (F1, 126)	Abundance Ratio: (F1, 130N) / (F1, 126)	Abundance Ratio: (F1, 130C) / (F1, 126)	Abundances Count: F1: 126, Control	Abundances Count: F1: 127N, Sample	Abundances Count: F1: 127C, Sample	Abundances Count: F1: 128N, Sample	Abundances Count: F1: 128C, Sample	Abundances Count: F1: 129N, Sample	Abundances Count: F1: 129C, Sample	Abundances Count: F1: 130N, Sample	Abundances Count: F1: 130C, Sample	emPAI	# Razor Peptides	Score Sequest HT	# Peptides Sequest HT
Checked	Protein FDR Confidence	Master	Accession	Description	Exp. q-value	Sum PEP Score	Coverage	# Peptides	# PSMs	# Unique Peptides	# Protein Groups	# AAs	MW [kDa]	calc. pI	Found in Sample: [S1] F1: 126, Control	Found in Sample: [S2] F1: 127N, Sample	Found in Sample: [S3] F1: 127C, Sample	Found in Sample: [S4] F1: 128N, Sample	High	High	High	High	High	Phospho [T31(100); T34(100); T147(100); S208(100); S228(100); S477(100)]	1	0.93482	1.00708	1.09457	1.2305	1.17764	1.07579	1.08626	1.05919	37	37	37	37	37	37	37	37	37	154.707	0	893.434	23
FALSE	High	Master Protein	P0C512	Ribulose bisphosphate carboxylase large chain OS=Oryza sativa subsp. japonica GN=rbcL PE=1 SV=1	0	304.706	49.6855	23	267	23	1	477	52.847	6.68	High	High	High	High	High	High	High	High	High	Phospho [S135(100); T144(100); S294(100)]	1	1.00587	1.01757	1.10532	1.09277	1.10239	1.06253	1.03536	1.04834	23	23	23	23	23	23	23	23	23	9	0	390.302	15
FALSE	High	Master Protein	P12085	ATP synthase subunit beta, chloroplastic OS=Oryza sativa subsp. japonica GN=atpB PE=1 SV=2	0	207.125	37.9518	15	108	15	1	498	53.921	5.5	High	High	High	High	High	High	High	High	High	Phospho [T68(100); S75(100); S151(99.3); S370(99.5)]	1	0.98151	0.973703	1.01052	1.10282	1.03398	1.00856	0.961407	1.00852	21	21	21	21	21	21	21	21	21	17.588	0	390.753	16
FALSE	High	Master Protein	Q40677	Fructose-bisphosphate aldolase, chloroplastic OS=Oryza sativa subsp. japonica GN=Os11g0171300 PE=1 SV=2	0	202.032	44.0722	16	119	16	1	388	41.98	6.8	High	High	High	High	High	High	High	High	High	Phospho [T77(100); S353(99.5); S457(100)]	1	0.86986	0.946046	0.86393	1.03748	0.931363	0.817261	0.835588	0.899952	17	17	17	17	17	17	17	17	17	6.279	13	219.417	13
FALSE	High	Master Protein	P93431	Ribulose bisphosphate carboxylase/oxygenase activase, chloroplastic OS=Oryza sativa subsp. japonica GN=RCA PE=1 SV=2	0	159.531	35.6223	13	64	3	1	466	51.421	5.62	High	High	High	High	High	High	High	High	High	Phospho [S67(100); S629(100); S631(100); S643(100); S645(100); S771(100); S774(100); S886(100)]	1	0.964255	0.880243	0.980228	1.00631	0.930386	1.10704	1.16022	1.19913	16	16	16	16	16	16	16	16	16	2.162	0	337.641	10
FALSE	High	Master Protein	Q655M5	Nuclear protein-like OS=Oryza sativa subsp. japonica GN=Os01g0101600 PE=2 SV=1	0	133.636	10.7362	10	111	10	1	978	106.259	9.54	High	High	High	High	High	High	High	High	High	Phospho [S41(100); S63(100); S65(100); S135(100); S307(98.4); S319(100); S327(100); T338(99.2); S345(100); S429(100); T489(100); S516(100); S517(100)]	1	1.01907	1.03188	1.1581	1.12393	1.09359	0.978251	0.933554	0.966302	18	18	18	18	18	18	18	18	18	2.424	0	346.574	14
FALSE	High	Master Protein	Q0IZR7	Os09g0553900 protein OS=Oryza sativa subsp. japonica GN=Os09g0553900 PE=2 SV=1	0	133.473	15.1755	14	156	14	1	883	94.158	5.34	High	High	High	High	High	High	High	High	High	Phospho [S294(100); S335(100); S350(100); S414(100); S418(100); S823(100); S824(100)]	1	1.02719	0.990869	1.06037	1.00129	0.990001	1.28887	1.20152	1.32459	16	16	16	16	16	16	16	16	16	1.807	0	627.633	12
FALSE	High	Master Protein	Q0JBZ3	OSJNBa0029H02.25 protein OS=Oryza sativa subsp. japonica GN=OSJNBa0029H02.25 PE=2 SV=1	0	131.635	13.1206	12	181	12	1	846	92.451	6.43	High	High	High	High	High	High	High	High	High	Phospho [S141(100); S266(100); S270(100); S287(100); T334(100)]	1	0.988615	0.854493	0.975342	0.935942	0.987069	1.01329	1.09491	1.16656	9	9	9	9	9	9	9	9	9	3.262	0	299.006	8
FALSE	High	Master Protein	Q5JKH1	Os01g0924900 protein OS=Oryza sativa subsp. japonica GN=Os01g0924900 PE=2 SV=1	0	129.29	24.9509	8	85	8	1	509	56.232	6.47	High	High	High	High	High	High	High	High	High	Phospho [S100(100); S124(100); S241(99.6); S251(100)]	1	1.01298	1.02711	1.05646	0.99626	1.02714	0.91859	0.890334	0.896332	15	15	15	15	15	15	15	15	15	10.103	0	241.382	10
FALSE	High	Master Protein	Q943W1	Os01g0501800 protein OS=Oryza sativa subsp. japonica GN=Os01g0501800 PE=2 SV=1	0	126.874	35.4354	10	85	10	1	333	34.84	6.32	High	High	High	High	High	High	High	High	High	Phospho [S144(100); S145(100); S258(100); S267(100); T282(98.8); S383(100); S398(100)]	1	0.99369	0.944139	1.02616	0.944989	0.940159	1.12125	1.10932	1.17621	13	13	13	13	13	13	13	13	13	4.878	0	230.135	9
FALSE	High	Master Protein	Q6H7U2	Zinc finger CCCH domain-containing protein 13 OS=Oryza sativa subsp. japonica GN=Os02g0161200 PE=2 SV=1	0	123.897	22.0657	9	66	9	1	426	49.048	9.11	High	High	High	High	High	High	High	High	High	Phospho [T25(100); S301(99.5); S373(99.5)]	1	0.826214	0.740052	0.635243	0.75197	0.701699	0.727296	0.809656	0.931317	2	2	2	2	2	2	2	2	2	7.185	0	205.544	11
FALSE	High	Master Protein	A0A0P0Y677	Os11g0707000 protein (Fragment) OS=Oryza sativa subsp. japonica GN=Os11g0707000 PE=4 SV=1	0	123.491	35.1706	11	72	1	1	381	42.378	5.2	High	High	High	High	High	High	High	High	High	Phospho [S69(100); T264(100); S269(100); S295(100); S503(100)]	1	0.972375	1.13774	1.07698	1.03044	1.09164	1.09189	1.08338	1.14605	9	9	9	9	9	9	9	9	9	1.683	0	379.103	5
FALSE	High	Master Protein	Q9ST27	Phototropin-2 OS=Oryza sativa subsp. japonica GN=PHOT2 PE=1 SV=1	0	119.635	7.05623	5	107	5	1	907	100.161	7.69	High	High	High	High	High	High	High	High	High	Phospho [S13(100); S54(100); S69(99.5); T75(100); S91(100); S119(100)]	1	1.01805	1.04046	1.12975	1.1742	1.04766	1.57486	1.54632	1.60568	10	10	10	10	10	10	10	10	10	52.367	0	227.395	7
FALSE	High	Master Protein	A0A0P0WAD7	Os04g0423600 protein OS=Oryza sativa subsp. japonica GN=Os04g0423600 PE=4 SV=1	0	112.504	71.4286	7	91	7	1	140	14.646	4.37	High	High	High	High	High	High	High	High	High	Phospho [S113(100); S128(100)]	1	1.04444	1.06239	1.06037	0.79922	0.840475	0.957417	0.843272	0.928904	11	11	11	11	11	11	11	11	11	49.119	0	514.435	7
FALSE	High	Master Protein	Q7XQK2	HMG protein OS=Oryza sativa subsp. japonica GN=Os04g0564600 PE=2 SV=2	0	111.933	29.5455	7	137	7	1	132	13.994	8.21	High	High	High	High	High	High	High	High	High	Phospho [S56(100); S199(99.1); S212(100); S459(100)]	1	1.082	0.973703	0.951886	0.898745	0.890317	1.03696	0.996943	1.06884	8	8	8	8	8	8	8	8	8	0.691	0	325.742	4
FALSE	High	Master Protein	Q84LG6	Eukaryotic translation initiation factor 3 subunit C OS=Oryza sativa subsp. japonica GN=P0474G09.113 PE=2 SV=1	0	109.735	9.50855	4	87	4	1	936	106.093	5.36	High	High	High	High	High	High	High	High	High	Phospho [S30(99.3); S149(99.6); S187(100); S227(100); S254(100); S466(100); S470(100)]	1	1.01501	0.973703	1.09946	0.895729	0.966546	1.17523	1.08723	1.22446	18	18	18	18	18	18	18	18	18	9.826	0	265.479	13
FALSE	High	Master Protein	Q5W645	Os05g0349500 protein OS=Oryza sativa subsp. japonica GN=Os05g0349500 PE=4 SV=1	0	105.865	24.5763	13	132	13	1	472	49.659	4.77	High	High	High	High	High	High	High	High	High	Phospho [S203(100); S205(100); S207(100); S247(100); S249(100); S272(100); S274(100); S280(100); S282(100); S301(100); S303(100); S336(100); S338(100); S422(100); S425(100); S442(100); S444(99.1); S449(100); S499(98.7); S500(98.7); S513(100); S542(100); S582(100); S587(100); S623(98.7); S627(100); T633(98.7); S674(100); S680(100); S797(100); S799(100)]	1	1.09925	0.989915	1.07112	1.05356	0.969478	1.19796	1.18711	1.21481	24	24	24	24	24	24	24	24	24	2.367	0	295.053	19
FALSE	High	Master Protein	Q10NF9	Os03g0270200 protein OS=Oryza sativa subsp. japonica GN=Os03g0270200 PE=4 SV=1	0	104.551	20.5952	19	108	19	1	840	96.699	11.22	High	High	High	High	High	High	High	High	High	Phospho [T286(98.6); S364(100); S403(100); T489(100)]	1	1.11448	1.13678	1.33499	1.27171	1.27635	1.19133	1.117	1.10745	12	12	12	12	12	12	12	12	12	2.268	0	205.104	10
FALSE	High	Master Protein	A0A0P0WKD6	Os05g0291700 protein OS=Oryza sativa subsp. japonica GN=Os05g0291700 PE=4 SV=1	0	104.441	20.6061	10	72	10	1	495	52.314	6.47	High	High	High	High	High	High	High	High	High	Phospho [S98(100); S116(100); S178(100); S186(99.4)]	1	1.14899	1.05667	0.844384	0.639376	0.639152	0.551154	0.512878	0.5682	17	17	17	17	17	17	17	17	17	6.279	4	226.793	8
FALSE	High	Master Protein	A0A0P0XDG3	Os08g0230200 protein (Fragment) OS=Oryza sativa subsp. japonica GN=Os08g0230200 PE=4 SV=1	0	102.926	20.4969	8	92	7	1	483	51.777	9.17	High	High	High	High	High	High	High	High	High	Phospho [S366(100); S380(100); S505(100)]	1	1.082	1.00804	1.01932	0.870597	0.912795	1.09663	1.03632	1.12554	12	12	12	12	12	12	12	12	12	1.907	0	331.382	5
FALSE	High	Master Protein	Q10KI0	Os03g0383800 protein OS=Oryza sativa subsp. japonica GN=Os03g0383800 PE=4 SV=1	0	102.375	8.81119	5	125	5	1	715	78.07	4.7	High	High	High	High	High	High	High	High	High	Phospho [S84(100); T115(99.4); S267(99.7)]	1	0.93482	0.962259	0.987069	1.10182	1.11119	1.00382	1.06513	1.0797	10	10	10	10	10	10	10	10	10	2.047	0	153.654	8
FALSE	High	Master Protein	A0A0P0WP33	Phosphoglycerate kinase OS=Oryza sativa subsp. japonica GN=Os05g0496200 PE=3 SV=1	0	101.854	23.3471	8	44	8	1	484	50.107	6.73	High	High	High	High	High	High	High	High	High	Phospho [S122(100); S148(100); S168(100); S170(100); S195(99.8); S215(100); S263(100); S492(100); S638(100); S642(100); S660(100)]	1	1.07185	1.00136	1.07698	0.947	0.918658	1.32296	1.22073	1.38129	14	14	14	14	14	14	14	14	14	2.257	1	239.083	11
FALSE	High	Master Protein	Q2QN51	Leo1, expressed OS=Oryza sativa subsp. japonica GN=LOC_Os12g38970 PE=2 SV=1	0	96.7994	25.3394	11	81	10	1	663	75.91	4.69	High	High	High	High	High	High	High	High	High	Phospho [S125(100); T507(100)]	1	0.980495	1.02139	0.981205	1.04854	1.04571	0.930901	0.962367	0.979572	19	19	19	19	19	19	19	19	19	4.736	2	224.347	16
FALSE	High	Master Protein	P0C2Z6	ATP synthase subunit alpha, chloroplastic OS=Oryza sativa subsp. japonica GN=atpA PE=3 SV=1	0	95.3137	31.1637	16	80	14	1	507	55.63	6.25	High	High	High	High	High	High	High	High	High	Phospho [S133(100); S149(100)]	1	1.02719	0.944139	1.03691	0.755992	0.81702	0.926166	0.847114	0.953032	10	10	10	10	10	10	10	10	10	27.48	0	149.541	9
FALSE	High	Master Protein	Q5Z7N3	HMG protein OS=Oryza sativa subsp. japonica GN=Os06g0728000 PE=2 SV=1	0	94.9924	29.2994	9	45	9	1	157	17.09	5.95	High	High	High	High	High	High	High	High	High	Phospho [S132(100)]	1	1.04546	1.04523	1.06818	0.988218	0.92159	1.26046	1.1122	1.21723	5	5	5	5	5	5	5	5	5	2.36	0	271.519	3
FALSE	High	Master Protein	Q6K7Q7	Os02g0827300 protein OS=Oryza sativa subsp. japonica GN=Os02g0827300 PE=4 SV=1	0	92.4022	3.09278	3	67	3	1	582	66.037	5.07	High	High	High	High	High	High	High	High	High	Phospho [S5(100); S10(100); S163(99.2); S167(100); S177(100); S179(100); S206(100); S208(100); S227(100); S232(100); S235(100)]	1	1.09113	0.947	1.03789	0.936947	0.91084	1.01329	1.00559	1.08453	17	17	17	17	17	17	17	17	17	22.357	4	515.876	13
FALSE	High	Master Protein	Q6K542	Os02g0252100 protein OS=Oryza sativa subsp. japonica GN=Os02g0252100 PE=2 SV=1	0	91.572	21.1321	13	186	10	1	265	30.448	11.09	High	High	High	High	High	High	High	High	High	Phospho [S21(100); S23(100); S25(100); S37(100); S39(100); S41(100); S83(100); S85(100); S87(100); S109(100); S111(100); S113(100); S123(100); S125(100); S133(100); S135(100); S137(100); S145(100); S147(100); S170(100); S264(100); S268(100); S287(100); S289(100); S326(100); S332(99); S364(100)]	1	0.9876	0.968935	1.00857	1.0033	0.943091	1.08621	1.13333	1.12192	16	16	16	16	16	16	16	16	16	45.416	0	371.853	12
FALSE	High	Master Protein	A0A0P0VG74	Os02g0204300 protein OS=Oryza sativa subsp. japonica GN=Os02g0204300 PE=4 SV=1	0	89.8496	31.3351	12	114	12	1	367	41.332	12.45	High	High	High	High	High	High	High	High	High	Phospho [S35(100); S148(99.5); S235(99.6); S264(100); S268(100); S365(100); S399(100)]	1	1.12463	0.924112	1.18448	1.06261	0.935272	1.50668	1.53095	1.61292	12	12	12	12	12	12	12	12	12	3.262	0	219.624	8
FALSE	High	Master Protein	Q5ZDH9	Os01g0139200 protein OS=Oryza sativa subsp. japonica GN=Os01g0139200 PE=4 SV=1	0	89.0325	17.1386	8	85	8	1	671	70.325	5.94	High	High	High	High	High	High	High	High	High	Phospho [S102(100)]	1	1.07083	0.978471	0.894226	0.828374	0.856111	1.16197	1.15158	1.20275	2	2	2	2	2	2	2	2	2	0.484	0	119.511	1
FALSE	High	Master Protein	Q9LGA3	Os01g0128400 protein OS=Oryza sativa subsp. japonica GN=Os01g0128400 PE=4 SV=1	0	87.0015	4.94881	1	32	1	1	586	63.277	8.75	High	High	High	High	High	High	High	High	High	Phospho [S66(100); S197(100); S212(100); S227(100); S250(100); T479(100); T492(100); S506(100); S513(100); S566(100)]	1	0.95918	0.919343	0.934295	0.887687	0.850248	1.03507	1.04593	1.15329	10	10	10	10	10	10	10	10	10	1.195	0	122.382	10
FALSE	High	Master Protein	Q10H93	Expressed protein OS=Oryza sativa subsp. japonica GN=Os03g0596900 PE=4 SV=1	0	83.1079	18.0654	10	34	10	1	703	77.842	5.14	High	High	High	High	High	High	High	High	High	Phospho [S51(99.3)]	1	1.07895	1.10531	1.29003	1.09377	1.08089	1.40535	1.30813	1.46333	7	7	7	7	7	7	7	7	7	36.276	0	211.295	2
FALSE	High	Master Protein	Q2QZU5	Auxin-repressed protein-like protein ARP1, putative, expressed OS=Oryza sativa subsp. japonica GN=LOC_Os11g44810 PE=2 SV=1	0	82.7441	23.2	2	106	2	1	125	13.565	9.45	High	High	High	High	High	High	High	High	High	Phospho [S330(100); T346(98.7)]	1	0.919595	1.06526	0.995865	1.16113	1.16103	0.968781	1.09107	0.985604	13	13	13	13	13	13	13	13	13	10.548	0	133.794	9
FALSE	High	Master Protein	P0C367	Photosystem II CP43 reaction center protein OS=Oryza sativa subsp. japonica GN=psbC PE=3 SV=1	0	81.542	20.5074	9	41	9	1	473	52.043	7.21	High	High	High	High	High	High	High	High	High	Phospho [S125(100)]	1	1.00283	1.09196	1.07503	1.03949	1.03887	0.946053	0.899938	0.875824	9	9	9	9	9	9	9	9	9	3.642	0	141.468	7
FALSE	High	Master Protein	Q8GTK4	Os07g0141400 protein OS=Oryza sativa subsp. japonica GN=OJ1351_C05.112 PE=2 SV=1	0	81.5129	38.5827	7	44	7	1	254	26.923	8.5	High	High	High	High	High	High	High	High	High	Phospho [T111(100)]	1	0.917565	1.01376	1.00173	1.02441	1.44444	1.14492	1.32157	1.36923	10	10	10	10	10	10	10	10	10	12.895	0	240.985	8
FALSE	High	Master Protein	Q6Z411	Chlorophyll a-b binding protein, chloroplastic OS=Oryza sativa subsp. japonica GN=Os07g0558400 PE=2 SV=1	0	81.0249	25.5172	8	70	8	1	290	31.33	5.5	High	High	High	High	High	High	High	High	High	Phospho [S92(100); S104(100); T127(100)]	1	1.03023	1.09482	1.32424	1.57632	1.41903	1.33622	1.27835	1.20637	14	14	14	14	14	14	14	14	14	12.594	0	213.58	9
FALSE	High	Master Protein	P18566	Ribulose bisphosphate carboxylase small chain A, chloroplastic OS=Oryza sativa subsp. japonica GN=RBCS-A PE=2 SV=2	0	80.1601	45.1429	9	71	9	1	175	19.618	8.85	High	High	High	High	High	High	High	High	High	Phospho [S74(100); S95(99.3); S115(100); S129(99.2); S177(100); S185(98.9)]	1	1.1835	1.02711	0.785746	0.578052	0.587355	0.486758	0.45141	0.50185	8	8	8	8	8	8	8	8	8	2.415	0	172.202	7
FALSE	High	Master Protein	Q7X8W5	OSJNBa0035M09.9 protein OS=Oryza sativa subsp. japonica GN=Os04g0606500 PE=2 SV=2	0	78.3646	18.0498	7	74	6	1	482	51.605	9.42	High	High	High	High	High	High	High	High	High	Phospho [S82(100)]	1	0.800839	0.620843	0.684107	0.692657	0.689971	0.597557	0.704007	0.878237	3	3	3	3	3	3	3	3	3	30.623	0	68.5847	2
FALSE	High	Master Protein	A0A0P0V241	Os01g0332900 protein OS=Oryza sativa subsp. japonica GN=Os01g0332900 PE=4 SV=1	0	77.89	25.2336	2	12	2	1	107	11.919	4.12	High	High	High	High	High	High	High	High	High	Phospho [S138(100); S142(100); S707(100); S725(100); S728(100); S761(99.5)]	1	1.11448	1.02616	1.08871	0.998271	0.996842	1.38451	1.32638	1.54295	8	8	8	8	8	8	8	8	8	0.477	0	222.763	4
FALSE	High	Master Protein	Q6ZHZ1	Probable sucrose-phosphate synthase 4 OS=Oryza sativa subsp. japonica GN=SPS4 PE=2 SV=1	0	77.236	5.15947	4	52	4	1	1066	118.651	6.39	High	High	High	High	High	High	High	High	High	Phospho [S221(100); S284(100); S360(100)]	1	1.04952	1.01757	1.11412	0.933931	0.965569	1.39114	1.18135	1.37647	7	7	7	7	7	7	7	7	7	15.681	0	361.24	7
FALSE	High	Master Protein	Q7XXQ8	Os06g0232000 protein OS=Oryza sativa subsp. japonica GN=P0479H10.4-1 PE=2 SV=1	0	76.641	12.5984	7	102	7	1	381	41.638	5.16	High	High	High	High	High	High	High	High	High	Phospho [S102(100); S128(99.2); S186(100); S370(100); S374(99.6); S424(100)]	1	0.958165	0.984193	0.964591	0.92991	0.912795	0.904385	0.906661	0.916841	17	17	17	17	17	17	17	17	17	1.894	0	178.873	12
FALSE	High	Master Protein	Q10QF7	Expressed protein OS=Oryza sativa subsp. japonica GN=LOC_Os03g10180 PE=2 SV=1	0	76.3036	25.8649	12	85	12	1	607	66.433	5.88	High	High	High	High	High	High	High	High	High	Phospho [S543(99.6)]	1	0.99775	1.09291	1.3213	1.30087	1.40242	1.17049	1.20152	1.21602	8	8	8	8	8	8	8	8	8	1.683	0	446.382	2
FALSE	High	Master Protein	Q0DG76	Os05g0549100 protein OS=Oryza sativa subsp. japonica GN=Os05g0549100 PE=3 SV=1	0	75.5672	3.04114	2	167	2	1	559	62.348	9.26	High	High	High	High	High	High	High	High	High	Phospho [S91(99.6); S258(100); T277(99.5)]	1	0.96527	1.08814	1.05059	1.13399	1.11314	1.12314	1.10835	1.05195	12	12	12	12	12	12	12	12	12	2.631	6	176.123	9
FALSE	High	Master Protein	Q7X8A1	Glyceraldehyde-3-phosphate dehydrogenase OS=Oryza sativa subsp. japonica GN=Os04g0459500 PE=2 SV=1	0	71.673	23.6318	9	64	5	1	402	42.689	7.72	High	High	High	High	High	High	High	High	High	Phospho [S316(100); S320(100); S326(100); S524(100); T778(100)]	1	1.10839	1.10722	1.19914	1.01938	1.01443	1.16102	1.13813	1.20516	8	8	8	8	8	8	8	8	8	1.113	0	201.715	6
FALSE	High	Master Protein	Q5N861	Os01g0897800 protein OS=Oryza sativa subsp. japonica GN=Os01g0897800 PE=4 SV=1	0	71.0588	5.40284	6	61	6	1	1055	115.307	4.58	High	High	High	High	High	High	High	High	High	Phospho [S68(99.4); S159(100)]	1	1.04647	1.04427	1.11607	1.11388	1.10141	1.38641	1.32638	1.48263	5	5	5	5	5	5	5	5	5	0.874	0	133.652	3
FALSE	High	Master Protein	Q6AVL0	Os03g0602600 protein OS=Oryza sativa subsp. japonica GN=OJ1519_A12.11 PE=4 SV=1	0	70.6352	7.47029	3	44	3	1	589	65.506	7.05	High	High	High	High	High	High	High	High	High	Phospho [S102(100); S543(100)]	1	1.01399	1.07098	0.977296	0.899751	0.966546	1.08526	1.06994	1.14243	5	5	5	5	5	5	5	5	5	0.863	0	230.218	4
FALSE	High	Master Protein	Q2QT46	Os12g0407500 protein OS=Oryza sativa subsp. japonica GN=LOC_Os12g21890 PE=2 SV=1	0	70.3825	10.7903	4	84	4	1	658	71.88	6.39	High	High	High	High	High	High	High	High	High	Phospho [S107(100); S140(100); S142(100); S146(98.8); S160(99.5); S168(96.8); Y169(96.8); S170(96.8); S180(100); S194(100)]	1	1.03937	0.954629	1.02225	0.922873	0.903022	1.10894	1.08819	1.17259	17	17	17	17	17	17	17	17	17	38.811	2	406.199	12
FALSE	High	Master Protein	Q6K9C3	Serine/arginine-rich splicing factor RSZ23 OS=Oryza sativa subsp. japonica GN=RSZ23 PE=2 SV=1	0	70.2226	32.5	12	223	10	1	200	22.784	11.33	High	High	High	High	High	High	High	High	High	Phospho [S310(100)]	1	1.04647	0.996591	1.12096	1.06663	1.02323	1.14208	1.09299	1.11107	7	7	7	7	7	7	7	7	7	9	0	147.52	4
FALSE	High	Master Protein	Q2QY46	60S acidic ribosomal protein P0 OS=Oryza sativa subsp. japonica GN=Os12g0133050 PE=3 SV=1	0	70.217	9.6875	4	42	4	1	320	34.445	5.49	High	High	High	High	High	High	High	High	High	Phospho [S528(100)]	1	0.99572	0.917436	0.928431	0.924883	0.851225	1.00193	0.94604	1.01335	6	6	6	6	6	6	6	6	6	0.947	0	82.8631	5
FALSE	High	Master Protein	Q9LWT6	Os06g0114000 protein OS=Oryza sativa subsp. japonica GN=Os06g0114000 PE=2 SV=1	0	69.717	11.98	5	24	5	1	601	64.046	5.67	High	High	High	High	High	High	High	High	High	Phospho [S539(100)]	1	1.11651	0.929834	1.09066	0.941973	0.932341	0.920484	0.895136	1.0037	3	3	3	3	3	3	3	3	3	0.585	0	74.8675	2
FALSE	High	Master Protein	Q6Z9X3	Os08g0407200 protein OS=Oryza sativa subsp. japonica GN=P0453D01.16-1 PE=2 SV=1	0	69.0233	6.44068	2	45	2	1	590	63.458	5.14	High	High	High	High	High	High	High	High	High	Phospho [S220(100)]	1	1.12666	0.867845	0.933318	0.639376	0.789655	1.00761	1.00367	1.11107	6	6	6	6	6	6	6	6	6	0.945	1	119.836	6
FALSE	High	Master Protein	Q07078	Heat shock protein 81-3 OS=Oryza sativa subsp. japonica GN=HSP81-3 PE=1 SV=2	0	68.0241	4.57797	6	40	5	1	699	80.134	5.06	High	High	High	High	High	High	High	High	High	Phospho [S408(100); S416(100)]	1	1.09113	0.896455	0.881521	0.584084	0.707562	0.889233	0.761634	0.866173	6	6	6	6	6	6	6	6	6	1.593	0	279.412	4
FALSE	High	Master Protein	Q9SLY8	Calreticulin OS=Oryza sativa subsp. japonica GN=Os07g0246200 PE=1 SV=2	0	67.2466	5.42453	4	65	4	1	424	48.279	4.63	High	High	High	High	High	High	High	High	High	Phospho [S39(100); S284(100); S298(100); S328(99)]	1	0.99572	0.947	1.01346	1.12594	1.02421	0.74813	0.873046	0.762425	5	5	5	5	5	5	5	5	5	0.65	0	147.65	5
FALSE	High	Master Protein	Q0DKG9	Os05g0164100 protein OS=Oryza sativa subsp. japonica GN=Os05g0164100 PE=4 SV=1	0	66.905	9.31436	5	61	5	1	773	84.894	6.48	High	High	High	High	High	High	High	High	High	Phospho [S467(100); S471(99.4); S495(100); S646(100)]	1	0.98557	0.996591	1.03984	1.01737	0.99391	1.10136	1.15061	1.0978	5	5	5	5	5	5	5	5	5	0.286	0	233.774	3
FALSE	High	Master Protein	Q0DKN6	Os05g0151400 protein OS=Oryza sativa subsp. japonica GN=Os05g0151400 PE=4 SV=1	0	65.1078	4.36447	3	96	3	1	1306	139.874	4.48	High	High	High	High	High	High	High	High	High	Phospho [S25(100); S400(100); S569(100); S588(100); S832(98.7); S836(100)]	1	1.22308	1.10245	1.0418	0.701705	0.797474	0.759494	0.690561	0.715377	7	7	7	7	7	7	7	7	7	0.598	0	121.186	7
FALSE	High	Master Protein	A0A0P0WG85	Os04g0663100 protein OS=Oryza sativa subsp. japonica GN=Os04g0663100 PE=4 SV=1	0	63.8949	9.40649	7	40	7	1	893	98.421	4.91	High	High	High	High	High	High	High	High	High	Phospho [S57(100); S179(100); S482(100); S732(100)]	1	0.94903	0.985147	1.00466	1.08473	1.07112	1.22731	1.26107	1.29564	7	7	7	7	7	7	7	7	7	0.54	0	156.344	5
FALSE	High	Master Protein	Q0JGK4	Probable sucrose-phosphate synthase 1 OS=Oryza sativa subsp. japonica GN=SPS1 PE=2 SV=2	0	62.3187	5.2583	5	57	5	1	1084	119.273	6.73	High	High	High	High	High	High	High	High	High	Phospho [S5(100); S10(100); S161(99.2); S165(100); S175(100); S177(100); S225(100); S230(100); S233(100); S254(100); S262(99)]	1	1.03328	0.950815	1.12585	1.01235	0.987069	1.31917	1.27451	1.4392	11	11	11	11	11	11	11	11	11	10.22	0	385.327	12
FALSE	High	Master Protein	Q2QNB0	Os12g0572400 protein OS=Oryza sativa subsp. japonica GN=LOC_Os12g38430 PE=2 SV=1	0	62.221	24.7148	12	171	9	1	263	30.168	10.9	High	High	High	High	High	High	High	High	High	Phospho [S339(100); T343(99.2)]	1	1.04647	1.02329	1.0848	0.967106	0.977296	1.2633	1.19287	1.37405	7	7	7	7	7	7	7	7	7	2.36	0	184.537	2
FALSE	High	Master Protein	Q7F1J8	DnaJ protein family-like OS=Oryza sativa subsp. japonica GN=OJ1081_B12.119 PE=2 SV=1	0	61.782	4.82234	2	61	2	1	394	44.205	5.63	High	High	High	High	High	High	High	High	High	Phospho [S214(100); S218(100); S230(100)]	1	0.921625	1.06526	1.05939	1.08774	1.05548	1.4508	1.35135	1.52726	7	7	7	7	7	7	7	7	7	6.943	0	82.4464	4
FALSE	High	Master Protein	A0A0P0XZL7	Os11g0158832 protein OS=Oryza sativa subsp. japonica GN=Os11g0158832 PE=4 SV=1	0	61.4792	13.308	4	20	4	1	263	26.129	5.72	High	High	High	High	High	High	High	High	High	Phospho [T273(100); T314(100)]	1	0.929745	1.07002	1.08187	1.11991	1.21478	1.18849	0.978695	1.0978	3	3	3	3	3	3	3	3	3	0.438	0	179.138	3
FALSE	High	Master Protein	Q6Z3Y9	Phosphoinositide phospholipase C OS=Oryza sativa subsp. japonica GN=Os07g0694000 PE=2 SV=1	0	60.7141	5.68562	3	35	3	1	598	67.74	6.62	High	High	High	High	High	High	High	High	High	Phospho [S32(100); T35(100); S42(100)]	1	1.0211	0.961305	1.03202	1.04753	1.00271	1.18091	1.09395	1.20878	10	10	10	10	10	10	10	10	10	3.062	3	101.452	8
FALSE	High	Master Protein	Q69V57	Fructose-bisphosphate aldolase OS=Oryza sativa subsp. japonica GN=Os06g0608700 PE=2 SV=1	0	59.3601	21.2291	8	37	6	1	358	37.731	7.72	High	High	High	High	High	High	High	High	High	Phospho [S602(100); S930(99.3); T938(91.3); S950(100)]	1	1.17132	0.860216	1.12487	1.01637	0.960682	1.08621	1.09779	1.13157	8	8	8	8	8	8	8	8	8	0.551	0	77.6112	5
FALSE	High	Master Protein	Q2QW32	Leucine Rich Repeat family protein, expressed OS=Oryza sativa subsp. japonica GN=Os12g0210400 PE=2 SV=1	0	59.0614	7.85936	5	42	5	1	967	104.172	6.98	High	High	High	High	High	High	High	High	High	Phospho [S233(99.1); S242(100); S245(100); S246(100); S262(100); S276(100); S330(100)]	1	1.06576	1.03283	1.03691	0.96409	0.903022	1.07863	0.983497	1.07608	8	8	8	8	8	8	8	8	8	1.512	0	87.227	7
FALSE	High	Master Protein	A3C592	Os10g0447900 protein OS=Oryza sativa subsp. japonica GN=Os10g0447900 PE=4 SV=1	0	59.0054	16.0494	7	28	7	1	567	61.329	7.61	High	High	High	High	High	High	High	High	High	Phospho [S270(100); T289(99.5)]	1	0.86377	1.05572	0.987069	1.12393	1.03887	1.06727	1.06898	1.07126	5	5	5	5	5	5	5	5	5	1.593	0	127.186	9
FALSE	High	Master Protein	Q9SNK3	Glyceraldehyde-3-phosphate dehydrogenase OS=Oryza sativa subsp. japonica GN=OJ1528D07.7 PE=3 SV=1	0	58.626	23.6486	9	46	5	1	444	47.081	6.68	High	High	High	High	High	High	High	High	High	Phospho [S92(100)]	1	1.07591	1.00613	1.16005	1.02441	1.01737	0.904385	0.88169	0.885475	9	9	9	9	9	9	9	9	9	6.017	0	130.788	8
FALSE	High	Master Protein	Q0D5P8	Oxygen-evolving enhancer protein 3, chloroplastic OS=Oryza sativa subsp. japonica GN=Os07g0544800 PE=2 SV=1	0	58.0766	37.3272	8	39	8	1	217	22.967	9.8	High	High	High	High	High	High	High	High	High	Phospho [S35(100); S118(100)]	1	1.1429	0.939371	1.17764	0.969117	0.989024	1.10799	1.11988	1.14123	5	5	5	5	5	5	5	5	5	0.369	0	128.289	4
FALSE	High	Master Protein	Q6YPF2	Os08g0120500 protein OS=Oryza sativa subsp. japonica GN=Os08g0120500 PE=4 SV=1	0	58.0078	8.51955	4	32	4	1	716	78.535	5.26	High	High	High	High	High	High	High	High	High	Phospho [S8(99.4); S108(99.4); S110(99.4); S176(99.5)]	1	1.10636	1.04809	1.16982	1.0033	0.962637	0.963099	0.926831	1.00491	6	6	6	6	6	6	6	6	6	5.31	0	88.6737	4
FALSE	High	Master Protein	Q6YVF0	Os02g0223700 protein OS=Oryza sativa subsp. japonica GN=Os02g0223700 PE=2 SV=1	0	57.9181	27.1552	4	34	4	1	232	23.454	10.07	High	High	High	High	High	High	High	High	High	Phospho [S150(100); S172(100); S215(100); S223(100); S318(100); S318(100); S318(100); S318(100); S318(100); S318(100)]	1	1.03937	1.06621	1.16298	0.983191	0.973387	1.33432	1.18327	1.33183	6	6	6	6	6	6	6	6	6	3.281	0	117.272	6
FALSE	High	Master Protein	Q2QM23	Methyl-CpG binding domain containing protein, expressed OS=Oryza sativa subsp. japonica GN=Os12g0620400 PE=2 SV=1	0	57.7719	26.0726	6	44	6	1	303	31.491	4.79	High	High	High	High	High	High	High	High	High	Phospho [S282(100); S338(100)]	1	1.11042	1.05572	1.1581	1.00229	1.02127	1.15439	1.17847	1.26548	6	6	6	6	6	6	6	6	6	0.711	1	59.4963	5
FALSE	High	Master Protein	Q0JLQ1	Os01g0582400 protein OS=Oryza sativa subsp. japonica GN=Os01g0582400 PE=4 SV=1	0	57.7435	10.6212	5	13	4	1	499	56.814	6.29	High	High	High	High	High	High	High	High	High	Phospho [S722(100); S826(100); S844(100)]	1	1.09925	0.895502	0.919636	0.879644	0.775973	0.970675	0.993101	0.957857	8	8	8	8	8	8	8	8	8	0.655	0	140.307	6
FALSE	High	Master Protein	Q654U5	Os06g0247800 protein OS=Oryza sativa subsp. japonica GN=Os06g0247800 PE=2 SV=1	0	57.0862	6.25686	6	58	6	1	911	99.18	9.17	High	High	High	High	High	High	High	High	High	Phospho [S550(100); T675(100); S709(100); S728(99.6); S730(100); S732(99.6); S754(100)]	1	1.01196	0.970842	1.01932	0.939963	0.930386	1.11178	1.13621	1.099	8	8	8	8	8	8	8	8	8	0.974	0	218.363	6
FALSE	High	Master Protein	Q5JKF2	DEAD-box ATP-dependent RNA helicase 40 OS=Oryza sativa subsp. japonica GN=Os01g0549400 PE=2 SV=2	0	57.0508	7.57576	6	74	6	1	792	87.927	9.99	High	High	High	High	High	High	High	High	High	Phospho [S56(100); S381(100)]	1	0.98151	0.885965	0.937227	1.03647	0.932341	1.0114	1.0296	1.0423	5	5	5	5	5	5	5	5	5	0.512	0	92.5573	3
FALSE	High	Master Protein	Q8H069	Os03g0206700 protein OS=Oryza sativa subsp. japonica GN=OSJNBa0014O06.3 PE=4 SV=1	0	56.7408	5.59105	3	24	3	1	626	67.979	8.1	High	High	High	High	High	High	High	High	High	Phospho [S286(100); S483(99.7); S622(100); S950(100); S1061(100); T1065(100)]	1	1.10331	0.959398	1.07307	0.989223	0.947	1.22163	1.16118	1.23412	9	9	9	9	9	9	9	9	9	0.41	0	79.8534	8
FALSE	High	Master Protein	Q5N8F0	MAPK activating protein-like OS=Oryza sativa subsp. japonica GN=P0692C11.22-1 PE=2 SV=1	0	56.5939	9.90009	8	32	8	1	1101	121.447	6.39	High	High	High	High	High	High	High	High	High	Phospho [T175(100); T183(100); T203(100)]	1	0.866815	1.19686	1.01639	1.19431	1.18644	1.01802	1.18519	1.099	7	7	7	7	7	7	7	7	7	3.394	0	128.452	5
FALSE	High	Master Protein	Q7XV11	Chlorophyll a-b binding protein, chloroplastic OS=Oryza sativa subsp. japonica GN=Os04g0457000 PE=2 SV=1	0	56.0016	20.6349	5	36	5	1	252	27.043	7.4	High	High	High	High	High	High	High	High	High	Phospho [S48(100); S118(100); S149(100); S188(100); S211(100); S214(100)]	1	0.99775	0.872613	0.960682	0.890703	0.828747	0.895862	0.899938	0.943381	7	7	7	7	7	7	7	7	7	0.413	0	117.395	6
FALSE	High	Master Protein	Q84ZL5	Os08g0154600 protein OS=Oryza sativa subsp. japonica GN=OJ1066_B03.125 PE=4 SV=1	0	55.9895	9.27948	6	31	6	1	916	102.603	9.54	High	High	High	High	High	High	High	High	High	Phospho [S196(100)]	1	1.09925	1.04141	1.12682	1.01737	0.906931	1.06348	1.12948	1.19551	3	3	3	3	3	3	3	3	3	0.995	0	146.216	2
FALSE	High	Master Protein	Q0JCK5	Os04g0464500 protein OS=Oryza sativa subsp. japonica GN=Os04g0464500 PE=4 SV=1	0	54.5098	15.1125	2	72	2	1	311	33.002	5.54	High	High	High	High	High	High	High	High	High	Phospho [S227(98.8)]	1	1.13782	0.963212	1.14735	1.11991	1.033	1.21879	1.17463	1.22567	4	4	4	4	4	4	4	4	4	0.701	0	42.4298	3
FALSE	High	Master Protein	A0A0P0X1D1	Os06g0729650 protein OS=Oryza sativa subsp. japonica GN=Os06g0729650 PE=4 SV=1	0	54.2263	14.9746	3	16	3	1	394	42.825	9.03	High	High	High	High	High	High	High	High	High	Phospho [S262(99.4); S276(100); S279(100); S336(100)]	1	1.07794	0.951768	1.04375	0.889697	0.822883	1.04075	1.01999	1.14002	8	8	8	8	8	8	8	8	8	1.873	0	106.688	7
FALSE	High	Master Protein	Q10RS7	Os03g0147400 protein OS=Oryza sativa subsp. japonica GN=Os03g0147400 PE=4 SV=1	0	54.023	13.1059	7	44	7	1	557	60.203	6.43	High	High	High	High	High	High	High	High	High	Phospho [S492(99.1)]	1	0.85768	0.863077	0.681175	0.748954	0.768155	1.90063	2.18309	1.97	4	4	4	4	4	4	4	4	4	0.859	0	93.7807	2
FALSE	High	Master Protein	Q6ZFM7	Os07g0582400 protein OS=Oryza sativa subsp. japonica GN=Os07g0582400 PE=3 SV=1	0	53.1017	3.52941	2	29	2	1	510	54.382	9.23	High	High	High	High	High	High	High	High	High	Phospho [S51(100); S53(100); S69(99.2); S72(99.2); S85(100); S87(100); S255(100); S272(100); S293(100); S295(100); S303(100); S308(100); S315(100); S317(100); S353(100); S355(100)]	1	1.07489	0.931741	1.07014	1.13097	0.961659	1.14776	1.26587	1.20396	15	15	15	15	15	15	15	15	15	3.146	3	411.738	15
FALSE	High	Master Protein	Q5JN45	Os01g0959000 protein OS=Oryza sativa subsp. japonica GN=Os01g0959000 PE=2 SV=1	0	52.9702	18.75	15	165	12	1	432	48.083	12.37	High	High	High	High	High	High	High	High	High	Phospho [S25(100); S30(100); S106(100); S111(100); S113(100); S133(100); S599(100)]	1	1.09824	0.981332	1.07698	0.958058	0.953841	1.07011	1.08723	1.11227	8	8	8	8	8	8	8	8	8	0.805	0	192.422	8
FALSE	High	Master Protein	Q5Z4U6	Os06g0698859 protein OS=Oryza sativa subsp. japonica GN=Os06g0698859 PE=4 SV=1	0	52.8854	14.9378	8	71	8	1	723	79.862	8.85	High	High	High	High	High	High	High	High	High	Phospho [S87(100); S185(100); S195(100); S197(100); S229(100); S237(100); S249(100); S262(100); S421(100); S421(100); S421(100); S421(100); S421(100); S421(100); S421(100); S421(100); S421(100); S421(100); S421(100); S421(100); S421(100); S421(100); S421(100); S421(100); S421(100)]	1	1.15102	0.922204	1.03202	0.870597	0.817997	0.915749	0.872085	0.890301	11	11	11	11	11	11	11	11	11	10.365	0	353.207	11
FALSE	High	Master Protein	Q6Z725	Os02g0122800 protein OS=Oryza sativa subsp. japonica GN=P0575F10.6-1 PE=2 SV=1	0	52.6307	31.5412	11	129	11	1	279	32.518	9.88	High	High	High	High	High	High	High	High	High	Phospho [S91(100)]	1	0.992675	0.98324	0.976319	0.858533	0.892271	1.07769	1.06417	1.22808	5	5	5	5	5	5	5	5	5	1.929	0	99.5064	4
FALSE	High	Master Protein	Q6ZDM0	Myb transcription factor OS=Oryza sativa subsp. japonica GN=Os08g0144000 PE=2 SV=1	0	52.5279	8.87728	4	38	4	1	383	40.189	8.69	High	High	High	High	High	High	High	High	High	Phospho [S679(100)]	1	1.13275	1.05953	1.15614	1.03949	0.990001	1.12125	1.05361	1.11348	6	6	6	6	6	6	6	6	6	0.455	0	154.959	4
FALSE	High	Master Protein	Q6EU10	Probable N6-adenosine-methyltransferase MT-A70-like OS=Oryza sativa subsp. japonica GN=Os02g0672600 PE=2 SV=1	0	50.4183	8.64023	4	47	4	1	706	77.753	7.18	High	High	High	High	High	High	High	High	High	Phospho [S32(100); T35(100); S42(100)]	1	1.03328	0.909807	1.00955	0.956048	0.943091	1.19985	1.13237	1.20034	5	5	5	5	5	5	5	5	5	2.34	3	69.5319	7
FALSE	High	Master Protein	Q5N725	Fructose-bisphosphate aldolase OS=Oryza sativa subsp. japonica GN=B1417F08.1-1 PE=2 SV=1	0	50.096	26.8156	7	26	2	1	358	38.799	8.16	High	High	High	High	High	High	High	High	High	Phospho [S210(100); S221(100)]	1	1.17842	0.946046	0.99391	0.812289	0.84927	1.05306	1.00463	1.12192	5	5	5	5	5	5	5	5	5	0.887	0	145.232	3
FALSE	High	Master Protein	Q6K2P9	Os09g0326900 protein OS=Oryza sativa subsp. japonica GN=P0706E03.4-1 PE=2 SV=1	0	49.9996	10	3	40	2	1	450	48.894	6.39	High	High	High	High	High	High	High	High	High	Phospho [S48(100); S105(100); S716(100)]	1	0.99775	0.89264	0.992933	0.958058	0.950909	1.04644	1.07954	1.099	4	4	4	4	4	4	4	4	4	0.416	0	228.678	3
FALSE	High	Master Protein	Q53JI9	Probable sucrose-phosphate synthase 5 OS=Oryza sativa subsp. japonica GN=SPS5 PE=2 SV=1	0	49.455	3.84615	3	63	3	1	1014	108.917	6.11	High	High	High	High	High	High	High	High	High	Phospho [S107(100); S124(100)]	1	1.32255	1.06144	1.17471	0.886682	1.02714	1.10988	1.02768	1.24618	8	8	8	8	8	8	8	8	8	20.544	0	68.9903	5
FALSE	High	Master Protein	Q69MM2	HMG type nucleosome/chromatin assembly factor OS=Oryza sativa subsp. japonica GN=Os09g0551600 PE=2 SV=1	0	49.0953	22.0472	5	32	5	1	127	14.08	9.5	High	High	High	High	High	High	High	High	High	Phospho [S44(100); S67(100); S532(99.1)]	1	0.88001	0.812532	0.772064	0.856522	0.801383	0.699833	0.617567	0.722615	5	5	5	5	5	5	5	5	5	0.398	0	267.3	3
FALSE	High	Master Protein	P16081	Nitrate reductase [NADH] 1 OS=Oryza sativa subsp. japonica GN=NIA1 PE=2 SV=3	0	48.4739	4.14847	3	115	3	1	916	101.448	6.64	High	High	High	High	High	High	High	High	High	Phospho [S134(100); T413(100)]	1	1.06474	0.904085	0.971432	0.984196	0.875657	1.28603	1.27835	1.40301	4	4	4	4	4	4	4	4	4	0.501	0	80.7762	2
FALSE	High	Master Protein	Q2QXA8	Os12g0163800 protein OS=Oryza sativa subsp. japonica GN=Os12g0163800 PE=2 SV=1	0	47.7623	7.87992	2	23	2	1	533	58.219	5.15	High	High	High	High	High	High	High	High	High	Phospho [S100(100)]	1	1.03429	1.01757	1.08089	0.992239	0.932341	1.00193	0.919147	1.00491	6	6	6	6	6	6	6	6	6	62.096	2	195.522	4
FALSE	High	Master Protein	Q69UI8	Os08g0116500 protein OS=Oryza sativa subsp. japonica GN=Os08g0116500 PE=2 SV=1	0	45.9645	21.8182	4	63	3	1	110	11.076	4.51	High	High	High	High	High	High	High	High	High	Phospho [S652(99.4); S869(100); S881(99.1)]	1	1.09925	1.05095	1.10923	0.960069	0.92159	1.08147	1.01519	1.10624	5	5	5	5	5	5	5	5	5	0.535	1	109.888	3
FALSE	High	Master Protein	A0A0P0X7K6	Os07g0571100 protein (Fragment) OS=Oryza sativa subsp. japonica GN=Os07g0571100 PE=4 SV=1	0	45.9615	4.11985	3	36	2	1	1068	110.815	9.92	High	High	High	High	High	High	High	High	High	Phospho [S106(100)]	1	1.20075	1.09387	1.033	1.03748	0.985115	1.00287	1.00943	1.03748	2	2	2	2	2	2	2	2	2	0.624	0	33.3715	1
FALSE	High	Master Protein	Q0DFD6	Os05g0597100 protein OS=Oryza sativa subsp. japonica GN=Os05g0597100 PE=2 SV=1	0	45.9079	8.41751	1	7	1	1	297	32.527	4.68	High	High	High	High	High	High	High	High	High	Phospho [S70(100); S152(100); S172(100); S174(100); T198(100); S201(99.4); S219(100); S267(100)]	1	1.04343	1.07956	1.1063	1.09076	1.03593	1.2936	1.24858	1.38491	6	6	6	6	6	6	6	6	6	1.276	0	46.9622	6
FALSE	High	Master Protein	Q0D934	Os07g0109600 protein (Fragment) OS=Oryza sativa subsp. japonica GN=Os07g0109600 PE=4 SV=1	0	45.8508	23.1092	6	18	5	1	476	53.89	4.65	High	High	High	High	High	High	High	High	High	Phospho [S685(99.3); S751(100); S841(99.1); S848(99.6)]	1	1.07083	1.06049	1.03887	0.987212	0.982183	1.19227	1.20728	1.27393	8	8	8	8	8	8	8	8	8	0.264	0	97.2214	5
FALSE	High	Master Protein	Q6Z7R3	Os02g0742000 protein OS=Oryza sativa subsp. japonica GN=P0516G10.37-1 PE=4 SV=1	0	45.636	4.3088	5	52	5	1	1671	178.208	7.52	High	High	High	High	High	High	High	High	High	Phospho [S32(100); T35(100); S42(100)]	1	0.925685	1.02043	1.16591	0.528792	0.32544	0.964046	0.960446	0.676773	1	1	1	1	1	1	1	1	1	1.848	0	66.9051	6
FALSE	High	Master Protein	P17784	Fructose-bisphosphate aldolase cytoplasmic isozyme OS=Oryza sativa subsp. japonica GN=FBA PE=1 SV=2	0	45.5095	24.0223	6	25	1	1	358	38.839	7.33	High	High	High	High	High	High	High	High	High	Phospho [S149(100); S221(100); S225(100); S227(100); S231(100); S237(99.5); S241(100); S251(100); S253(100); S261(100); T263(98.9); S283(100); S285(100); S302(100); S304(100); S450(100); S450(100); S450(100); S450(100); S450(100); S450(100); S450(100); S450(100); S450(100); S450(100); S454(100); S454(100); S454(100); S454(100); S454(100); S454(100); S454(100); S454(100); S454(100); S454(100); S45…	1	1.07692	1.02711	1.16885	1.04351	1.03789	1.25667	1.2505	1.32459	12	12	12	12	12	12	12	12	12	9	0	221.032	11
FALSE	High	Master Protein	Q5ZCD9	Os01g0155600 protein OS=Oryza sativa subsp. japonica GN=Os01g0155600 PE=2 SV=1	0	45.3211	29.6296	11	82	11	1	324	36.871	11.27	High	High	High	High	High	High	High	High	High	Phospho [S86(100); S193(100); T282(100); S284(100); S301(100); S307(100); S323(99.5); S348(100); S355(99.4)]	1	0.99978	0.908853	0.965569	0.968111	0.915727	0.911961	0.96813	0.955445	11	11	11	11	11	11	11	11	11	2.675	0	92.0641	9
FALSE	High	Master Protein	Q5JJM4	Os01g0367300 protein OS=Oryza sativa subsp. japonica GN=Os01g0367300 PE=4 SV=1	0	45.2401	13.8968	9	35	9	1	698	79.716	10.56	High	High	High	High	High	High	High	High	High	Phospho [S139(100)]	1	1.13478	1.04332	1.03593	0.998271	0.990978	1.36368	1.28027	1.47901	3	3	3	3	3	3	3	3	3	1.512	0	229.382	1
FALSE	High	Master Protein	Q6ZD98	Os08g0156700 protein OS=Oryza sativa subsp. japonica GN=Os08g0156700 PE=2 SV=1	0	45.2327	9.87654	1	83	1	1	243	26.843	7.81	High	High	High	High	High	High	High	High	High	Phospho [S140(100); S179(100)]	1	1.06271	0.958444	1.02616	0.723822	0.805292	1.00098	0.984457	1.15208	6	6	6	6	6	6	6	6	6	1.738	0	85.1766	3
FALSE	High	Master Protein	A0A0P0XF63	Os08g0338600 protein (Fragment) OS=Oryza sativa subsp. japonica GN=Os08g0338600 PE=4 SV=1	0	44.6034	22.1757	3	24	3	1	239	25.959	10.18	High	High	High	High	High	High	High	High	High	Phospho [S240(100); S354(100); T402(100); S406(100); S408(100)]	1	1.04038	1.12152	1.12878	0.955042	1.10728	1.2633	1.22265	1.39939	3	3	3	3	3	3	3	3	3	0.468	0	103.779	3
FALSE	High	Master Protein	Q53QT1	Mutant TFIIF-alpha, putative, expressed OS=Oryza sativa subsp. japonica GN=Os10g0188100 PE=2 SV=1	0	44.58	11.1531	3	22	3	1	529	57.927	5.25	High	High	High	High	High	High	High	High	High	Phospho [S38(100); S361(99.3)]	1	1.00283	0.931741	0.986092	0.967106	0.951886	1.16102	1.17559	1.22205	3	3	3	3	3	3	3	3	3	0.389	0	72.6012	2
FALSE	High	Master Protein	Q9ARU4	Os01g0121700 protein OS=Oryza sativa subsp. japonica GN=Os01g0121700 PE=2 SV=1	0	44.5139	8.68263	2	22	2	1	668	73.322	8.75	High	High	High	High	High	High	High	High	High	Phospho [S454(100); S1252(97); S1254(97)]	1	1.05662	0.951768	0.991956	0.969117	0.907908	1.24341	1.16022	1.27996	6	6	6	6	6	6	6	6	6	0.349	0	84.368	4
FALSE	High	Master Protein	Q0DP22	Os03g0721200 protein (Fragment) OS=Oryza sativa subsp. japonica GN=Os03g0721200 PE=4 SV=1	0	44.4512	2.85488	4	26	4	1	1261	135.846	7.28	High	High	High	High	High	High	High	High	High	Phospho [S348(100); S357(100); T378(100)]	1	0.9876	1.2207	0.843407	0.796204	0.909863	1.08905	1.15061	1.2124	6	6	6	6	6	6	6	6	6	1.346	0	89.4682	3
FALSE	High	Master Protein	Q336W8	Hexose transporter, putative, expressed OS=Oryza sativa subsp. japonica GN=OSJNBb0064P21.3 PE=2 SV=2	0	44.3042	5.67568	3	30	3	1	740	78.848	5.02	High	High	High	High	High	High	High	High	High	Phospho [S8(100); S74(100)]	1	0.836364	0.71621	0.725154	0.796204	0.703653	0.914802	0.933554	1.19913	3	3	3	3	3	3	3	3	3	16.783	0	40.0116	3
FALSE	High	Master Protein	A0A0P0WP66	Os05g0494800 protein (Fragment) OS=Oryza sativa subsp. japonica GN=Os05g0494800 PE=4 SV=1	0	43.5738	57.8313	3	9	3	1	83	10.01	4.07	High	High	High	High	High	High	High	High	High	Phospho [T28(100)]	1	1.08301	0.93651	0.995865	0.901761	0.847316	1.33622	1.18615	1.41386	2	2	2	2	2	2	2	2	2	1.31	0	62.9676	2
FALSE	High	Master Protein	A0A0N7KMU9	Os07g0118300 protein OS=Oryza sativa subsp. japonica GN=Os07g0118300 PE=4 SV=1	0	42.7221	13.4615	2	13	2	1	208	22.647	8.56	High	High	High	High	High	High	High	High	High	Phospho [S394(100)]	1	1.18553	0.967027	1.1063	0.965096	0.949932	1.44512	1.26587	1.51279	4	4	4	4	4	4	4	4	4	0.453	0	85.8343	1
FALSE	High	Master Protein	A0A0P0WQU7	Os05g0563050 protein (Fragment) OS=Oryza sativa subsp. japonica GN=Os05g0563050 PE=4 SV=1	0	42.054	3.84615	1	21	1	1	494	56.354	5.73	High	High	High	High	High	High	High	High	High	Phospho [T264(100); S357(100); S377(100); S389(100)]	1	1.05459	1.02234	1.04473	1.06161	1.02421	1.24436	1.18519	1.30047	6	6	6	6	6	6	6	6	6	0.655	0	116.216	5
FALSE	High	Master Protein	Q0D5J1	Os07g0557500 protein OS=Oryza sativa subsp. japonica GN=Os07g0557500 PE=2 SV=1	0	41.9501	12.4098	5	46	5	1	693	74.761	4.82	High	High	High	High	High	High	High	High	High	Phospho [T568(100); S656(99.3); S661(99.3); S670(100); S706(100)]	1	1.16218	1.02902	1.09457	0.999276	0.938204	1.21784	1.06417	1.26428	9	9	9	9	9	9	9	9	9	1.054	0	60.0107	6
FALSE	High	Master Protein	Q84R70	Expressed protein OS=Oryza sativa subsp. japonica GN=LOC_Os03g46920 PE=4 SV=1	0	41.9454	9.72763	6	25	6	1	771	81.553	5	High	High	High	High	High	High	High	High	High	Phospho [S437(98.1)]	1	0.95106	0.99373	0.994888	0.884671	0.929409	0.950788	0.880729	1.00249	4	4	4	4	4	4	4	4	4	0.342	0	36.022	4
FALSE	High	Master Protein	Q5N755	Os01g0815700 protein OS=Oryza sativa subsp. japonica GN=Os01g0815700 PE=4 SV=1	0	41.3588	8.84211	4	13	4	1	950	103.507	7.09	High	High	High	High	High	High	High	High	High	Phospho [S136(100); S178(100); S185(100); S313(100)]	1	1.02414	0.967981	1.01834	0.959064	0.954818	1.02371	1.02864	1.03506	6	6	6	6	6	6	6	6	6	1.154	0	56.9477	4
FALSE	High	Master Protein	Q7XBX2	GTPase activating protein, putative, expressed OS=Oryza sativa subsp. japonica GN=LOC_Os10g42420 PE=4 SV=1	0	41.3173	15.7248	4	27	4	1	407	43.966	8.66	High	High	High	High	High	High	High	High	High	Phospho [S44(100); S50(100)]	1	1.17639	0.855447	1.076	0.845464	0.927454	0.996244	1.04785	1.02903	5	5	5	5	5	5	5	5	5	0.658	0	67.3002	3
FALSE	High	Master Protein	Q10NX2	Os03g0255500 protein OS=Oryza sativa subsp. japonica GN=Os03g0255500 PE=2 SV=1	0	41.2522	5.42986	3	23	3	1	663	73.158	7.24	High	High	High	High	High	High	High	High	High	Phospho [S96(100); T108(100)]	1	1.04647	0.951768	0.994888	0.952027	0.867839	1.29834	1.19095	1.37044	5	5	5	5	5	5	5	5	5	1.254	0	75.4952	3
FALSE	High	Master Protein	Q0J4A3	Os08g0526400 protein OS=Oryza sativa subsp. japonica GN=Os08g0526400 PE=4 SV=1	0	40.9825	23.4127	3	20	3	1	252	25.705	9.38	High	High	High	High	High	High	High	High	High	Phospho [S81(100)]	1	1.1023	1.0376	1.15614	1.05356	1.01346	1.59096	1.55592	1.62498	3	3	3	3	3	3	3	3	3	0.292	0	43.8812	2
FALSE	High	Master Protein	Q5QMK7	Os01g0817700 protein OS=Oryza sativa subsp. japonica GN=Os01g0817700 PE=2 SV=1	0	40.88	6.26118	2	8	2	1	559	60.752	5.68	High	High	High	High	High	High	High	High	High	Phospho [S230(100)]	1	1.00689	0.912668	1.15028	0.949011	1.02323	1.4849	1.37248	1.52123	4	4	4	4	4	4	4	4	4	1.929	0	66.2712	4
FALSE	High	Master Protein	Q84L14	Nuclear cap-binding protein subunit 2 OS=Oryza sativa subsp. japonica GN=CBP20 PE=2 SV=1	0	40.7784	6.17284	4	18	4	1	243	28.556	5.59	High	High	High	High	High	High	High	High	High	Phospho [S41(100)]	1	0.952075	0.988962	1.03593	1.13097	1.14735	1.02465	1.16502	1.07126	5	5	5	5	5	5	5	5	5	2.831	0	79.2016	4
FALSE	High	Master Protein	Q10HD0	Chlorophyll a-b binding protein, chloroplastic OS=Oryza sativa subsp. japonica GN=RCABP89 PE=2 SV=1	0	40.5041	15.9696	4	23	4	1	263	28.477	5.91	High	High	High	High	High	High	High	High	High	Phospho [S243(98.6); S404(100)]	1	1.10128	0.950815	1.13855	1.03346	0.985115	1.14776	1.1266	1.20034	5	5	5	5	5	5	5	5	5	0.848	0	88.8271	3
FALSE	High	Master Protein	Q6YSC2	Os08g0467600 protein OS=Oryza sativa subsp. japonica GN=Os08g0467600 PE=4 SV=1	0	39.7102	6.95489	3	25	3	1	532	57.215	9.95	High	High	High	High	High	High	High	High	High	Phospho [S106(98.7); S289(100); S381(100)]	1	1.05053	0.906946	1.40828	1.137	1.2871	1.48774	1.59146	1.39577	6	6	6	6	6	6	6	6	6	0.458	0	117.854	4
FALSE	High	Master Protein	Q2QYY8	Phototropin-1A OS=Oryza sativa subsp. japonica GN=PHOT1A PE=1 SV=2	0	39.6544	7.05755	4	63	4	1	921	103.318	7.94	High	High	High	High	High	High	High	High	High	Phospho [S156(100); S186(100); T215(98.8); T216(98.8); S236(100); S330(98.8)]	1	1.17741	0.959398	1.12682	0.955042	0.920613	1.03034	0.948921	1.0604	8	8	8	8	8	8	8	8	8	1.61	0	72.0734	6
FALSE	High	Master Protein	Q6H8D8	Os02g0208900 protein OS=Oryza sativa subsp. japonica GN=OJ1006_A02.21-1 PE=2 SV=1	0	39.6399	12.3626	6	45	6	1	728	79.042	7.31	High	High	High	High	High	High	High	High	High	Phospho [S168(100); S698(100); S704(100); S713(100); S838(100); S879(100)]	1	1.2038	0.856401	1.119	0.961074	0.878589	0.932795	0.973892	0.936143	7	7	7	7	7	7	7	7	7	0.356	0	107.095	6
FALSE	High	Master Protein	Q5ZA32	Os06g0300800 protein OS=Oryza sativa subsp. japonica GN=P0501G08.38-1 PE=4 SV=1	0	39.5355	4.87256	6	33	6	1	1334	144.051	6.46	High	High	High	High	High	High	High	High	High	Phospho [S129(100)]	1	1.00486	0.672341	0.738836	0.748954	0.7447	0.80495	0.854797	1.07729	3	3	3	3	3	3	3	3	3	4.179	0	64.9123	2
FALSE	High	Master Protein	Q0DJC4	Os05g0301600 protein OS=Oryza sativa subsp. japonica GN=Os05g0301600 PE=2 SV=1	0	39.4942	23.0303	2	19	2	1	165	18.303	4.83	High	High	High	High	High	High	High	High	High	Phospho [S471(100)]	1	0.91249	0.988962	0.943091	0.889697	0.984137	0.943212	1.15158	1.06281	2	2	2	2	2	2	2	2	2	0.896	0	43.9603	2
FALSE	High	Master Protein	Q5NAW2	Zinc finger CCCH domain-containing protein 6 OS=Oryza sativa subsp. japonica GN=Os01g0258700 PE=2 SV=2	0	39.0298	8.40336	2	26	2	1	476	49.802	7.56	High	High	High	High	High	High	High	High	High	Phospho [T545(99.4)]	1	1.07286	1.0252	1.06428	1.13901	1.09848	1.13924	1.14965	1.18827	8	8	8	8	8	8	8	8	8	0.701	0	53.1961	7
FALSE	High	Master Protein	Q0DEU8	Os06g0133800 protein (Fragment) OS=Oryza sativa subsp. japonica GN=Os06g0133800 PE=4 SV=1	0	39.0219	11.7994	7	19	7	1	678	73.403	5.67	High	High	High	High	High	High	High	High	High	Phospho [S215(100); S413(100); S429(100)]	1	1.16015	0.988962	1.07698	0.994249	1.04082	1.01045	1.04016	1.0423	5	5	5	5	5	5	5	5	5	0.778	2	109.454	3
FALSE	High	Master Protein	Q2R4J4	Zinc finger CCCH domain-containing protein 63 OS=Oryza sativa subsp. japonica GN=Os11g0472000 PE=2 SV=2	0	38.9669	9.45946	3	31	2	1	444	47.975	8.44	High	High	High	High	High	High	High	High	High	Phospho [S758(100); S874(100); S988(100)]	1	1.01805	0.919343	0.986092	0.958058	0.969478	1.25951	1.1948	1.3644	4	4	4	4	4	4	4	4	4	0.164	0	45.1346	3
FALSE	High	Master Protein	Q0JRB9	Os01g0109700 protein (Fragment) OS=Oryza sativa subsp. japonica GN=Os01g0109700 PE=4 SV=1	0	38.8444	5.95777	3	10	3	1	1326	149.434	5.78	High	High	High	High	High	High	High	High	High	Phospho [S11(100); S13(99.4); S34(100); S38(99.2); S230(100); S234(100); S247(100); S249(100); S253(100)]	1	1.15102	1.04237	1.033	0.930915	0.942114	1.11557	1.04785	1.20878	8	8	8	8	8	8	8	8	8	3.281	0	208.168	6
FALSE	High	Master Protein	Q5Z990	Os06g0724600 protein OS=Oryza sativa subsp. japonica GN=P0548E04.4-1 PE=2 SV=1	0	38.3575	16.4835	6	94	6	1	273	31.566	10.54	High	High	High	High	High	High	High	High	High	Phospho [S39(100); S360(100); S364(99); S377(100)]	1	1.04241	1.08528	1.16982	1.09076	1.0975	1.39209	1.46852	1.37647	5	5	5	5	5	5	5	5	5	1.462	0	115.892	4
FALSE	High	Master Protein	Q69V56	Os06g0608800 protein OS=Oryza sativa subsp. japonica GN=P0556B08.19-1 PE=2 SV=1	0	38.3282	10.7383	4	50	4	1	447	49.776	6.15	High	High	High	High	High	High	High	High	High	Phospho [S126(100); S332(100)]	1	1.02922	0.701905	0.932341	0.878639	0.845361	0.682787	0.692482	0.63455	7	7	7	7	7	7	7	7	7	1.683	0	85.6508	5
FALSE	High	Master Protein	Q84NW1	Os07g0513000 protein OS=Oryza sativa subsp. japonica GN=P0580A11.134 PE=2 SV=1	0	38.2051	11.4525	5	30	5	1	358	39.682	8.32	High	High	High	High	High	High	High	High	High	Phospho [S136(99.4); S500(99.6); S509(100); S577(100); S584(99.3); S665(99.6)]	1	1.21699	0.933649	1.21478	1.03949	0.924522	1.12504	1.0757	1.17983	9	9	9	9	9	9	9	9	9	0.962	0	58.9163	8
FALSE	High	Master Protein	Q0D6U7	Os07g0438500 protein (Fragment) OS=Oryza sativa subsp. japonica GN=Os07g0438500 PE=4 SV=1	0	38.1437	7.5406	8	29	8	1	862	94.092	5.3	High	High	High	High	High	High	High	High	High	Phospho [S21(100); S314(99.3)]	1	1.04241	0.999452	1.08578	1.01536	1.05255	1.21027	1.18999	1.24377	4	4	4	4	4	4	4	4	4	1.154	0	147.896	2
FALSE	High	Master Protein	Q6Z8N9	Os08g0512400 protein OS=Oryza sativa subsp. japonica GN=P0711H09.10-2 PE=4 SV=1	0	38.1205	8.19209	2	32	2	1	354	35.241	10.07	High	High	High	High	High	High	High	High	High	Phospho [S185(100); S187(100); S189(100); S205(97.9); S207(100); S211(100); S213(100); S233(100); S239(100); S314(100)]	1	1.07489	0.990869	1.12389	1.05155	0.99391	1.12882	1.16502	1.15932	8	8	8	8	8	8	8	8	8	2.162	3	264.034	6
FALSE	High	Master Protein	Q0DL70	Os05g0120100 protein OS=Oryza sativa subsp. japonica GN=Os05g0120100 PE=4 SV=1	0	37.9854	15.7895	6	83	4	1	323	36.201	10.83	High	High	High	High	High	High	High	High	High	Phospho [S687(99.2); S722(100); S749(100); S777(100); S780(100)]	1	1.04241	1.02616	1.02225	0.943984	0.906931	0.997191	1.01519	0.995255	5	5	5	5	5	5	5	5	5	0.233	0	37.8639	4
FALSE	High	Master Protein	Q10N72	ABC transporter family protein, putative, expressed OS=Oryza sativa subsp. japonica GN=Os03g0280000 PE=4 SV=1	0	37.7509	4.67753	4	14	4	1	1411	155.547	6.48	High	High	High	High	High	High	High	High	High	Phospho [S480(100); S633(100)]	1	1.09418	1.02425	1.15614	1.12293	1.08089	1.52278	1.39937	1.60568	6	6	6	6	6	6	6	6	6	0.492	0	120.213	2
FALSE	High	Master Protein	Q9LGR0	FACT complex subunit SSRP1-A OS=Oryza sativa subsp. japonica GN=SSRP1-A PE=2 SV=1	0	37.3343	5.61622	2	60	2	1	641	71.29	5.76	High	High	High	High	High	High	High	High	High	Phospho [S110(98.8)]	1	0.86174	1.10054	0.816042	0.775092	0.815065	0.565359	0.640618	0.733473	3	3	3	3	3	3	3	3	3	5.813	0	57.9961	2
FALSE	High	Master Protein	Q0DFC9	Plastocyanin, chloroplastic OS=Oryza sativa subsp. japonica GN=PETE PE=1 SV=1	0	37.2302	20.7792	2	16	2	1	154	15.567	5.87	High	High	High	High	High	High	High	High	High	Phospho [S248(100); T260(100); S470(100)]	1	1.0211	0.990869	0.954818	0.921867	0.917681	1.1203	1.0805	1.27996	7	7	7	7	7	7	7	7	7	0.931	0	86.8052	4
FALSE	High	Master Protein	Q6Z3Y5	Os07g0694500 protein OS=Oryza sativa subsp. japonica GN=P0627E10.12-2 PE=2 SV=1	0	36.9649	8.51064	4	39	4	1	564	61.533	7.33	High	High	High	High	High	High	High	High	High	Phospho [S158(100); S164(99.3)]	1	1.18959	1.1015	1.18155	1.0425	1.0418	1.50194	1.29372	1.53209	3	3	3	3	3	3	3	3	3	0.208	0	64.7965	2
FALSE	High	Master Protein	Q69IM3	Bromodomain protein 103-like OS=Oryza sativa subsp. japonica GN=Os09g0515100 PE=4 SV=1	0	36.8803	2.58765	2	21	2	1	1198	133.819	6.54	High	High	High	High	High	High	High	High	High	Phospho [S9(100)]	1	0.964255	1.04237	1.00759	1.06462	1.05841	1.03412	1.0805	1.14364	7	7	7	7	7	7	7	7	7	1.818	0	72.1196	6
FALSE	High	Master Protein	P0C358	Photosystem I P700 chlorophyll a apoprotein A2 OS=Oryza sativa subsp. japonica GN=psaB PE=3 SV=1	0	36.6539	11.4441	6	26	6	1	734	82.508	7.15	High	High	High	High	High	High	High	High	High	Phospho [S216(100); S272(100)]	1	1.06677	0.972749	1.09555	0.965096	1.00662	1.29834	1.25146	1.48625	3	3	3	3	3	3	3	3	3	0.163	0	51.7064	2
FALSE	High	Master Protein	Q84T85	Expressed protein OS=Oryza sativa subsp. japonica GN=LOC_Os03g63670 PE=4 SV=1	0	36.5938	4.50262	2	14	2	1	955	105.519	5.72	High	High	High	High	High	High	High	High	High	Phospho [S172(100); T215(99.2); S295(100); S301(100)]	1	1.15508	0.883104	0.922568	0.841443	0.767178	1.09473	1.02864	1.14243	5	5	5	5	5	5	5	5	5	0.711	0	200.093	4
FALSE	High	Master Protein	Q6K8F1	Os02g0806600 protein OS=Oryza sativa subsp. japonica GN=OJ1111_C07.17-1 PE=2 SV=1	0	36.5163	5.07937	4	51	4	1	945	100.329	6.13	High	High	High	High	High	High	High	High	High	Phospho [S22(100)]	1	1.05764	0.997545	1.16591	1.01838	1.04766	1.43376	1.38112	1.5719	3	3	3	3	3	3	3	3	3	0.848	0	50.355	2
FALSE	High	Master Protein	Q6YSF3	Acidic leucine-rich nuclear phosphoprotein 32-related protein 1 OS=Oryza sativa subsp. japonica GN=Os07g0607800 PE=2 SV=1	0	36.4579	8.82353	2	21	2	1	476	51.794	3.93	High	High	High	High	High	High	High	High	High	Phospho [S231(100); S609(100)]	1	0.98557	1.0767	0.992933	1.03647	1.04668	1.16102	1.16886	1.14726	3	3	3	3	3	3	3	3	3	0.284	0	77.9608	2
FALSE	High	Master Protein	Q10NP2	Calcium-binding EF hand family protein, putative, expressed OS=Oryza sativa subsp. japonica GN=LOC_Os03g15740 PE=4 SV=1	0	36.3377	4.59906	2	52	2	1	848	92.371	6.55	High	High	High	High	High	High	High	High	High	Phospho [S335(100)]	1	1.11245	1.09863	1.12291	1.13901	1.03691	1.49437	1.38977	1.4585	2	2	2	2	2	2	2	2	2	0.12	0	88.286	2
FALSE	High	Master Protein	Q8LIB1	Os07g0644300 protein OS=Oryza sativa subsp. japonica GN=OJ1458_B07.103 PE=2 SV=1	0	36.2632	2.14823	2	17	2	1	931	106.99	6.14	High	High	High	High	High	High	High	High	High	Phospho [S265(100); S604(100)]	1	1.02516	0.93651	1.00759	0.980175	0.935272	1.28224	1.29468	1.41145	3	3	3	3	3	3	3	3	3	0.562	0	33.7909	3
FALSE	High	Master Protein	Q7XUF9	OJ991113_30.7 protein OS=Oryza sativa subsp. japonica GN=Os04g0487200 PE=4 SV=2	0	36.0643	6.43087	3	10	3	1	622	66.326	7.43	High	High	High	High	High	High	High	High	High	Phospho [S380(100); S661(100); S669(99.2); S674(99.6); T683(100)]	1	1.12666	1.02997	0.994888	0.83139	0.843407	0.940371	0.884571	0.97354	8	8	8	8	8	8	8	8	8	0.73	1	157.688	6
FALSE	High	Master Protein	Q5ZBN0	Os01g0607900 protein OS=Oryza sativa subsp. japonica GN=Os01g0607900 PE=2 SV=1	0	35.8764	5.40936	6	60	5	1	684	70.622	7.52	High	High	High	High	High	High	High	High	High	Phospho [S59(100); S63(100)]	1	1.05561	0.953676	1.06525	1.01436	0.976319	1.30212	1.17463	1.3439	4	4	4	4	4	4	4	4	4	0.931	0	136.374	3
FALSE	High	Master Protein	Q18PR9	Beta subunit 1 of SnRK1 OS=Oryza sativa subsp. japonica GN=OSKbeta1 PE=2 SV=1	0	35.8279	15.2542	3	26	3	1	295	31.959	5.4	High	High	High	High	High	High	High	High	High	Phospho [S7(100); S37(100)]	1	1.14493	1.11771	1.18351	1.11187	1.10141	1.60801	1.36479	1.90365	3	3	3	3	3	3	3	3	3	0.557	0	95.0766	3
FALSE	High	Master Protein	Q33B10	Os10g0151800 protein OS=Oryza sativa subsp. japonica GN=Os10g0151800 PE=2 SV=1	0	35.7232	9.36073	3	24	3	1	438	47.792	5.11	High	High	High	High	High	High	High	High	High	Phospho [T157(100); S159(100); T182(100); S184(100); S227(100); S237(100); S244(100); S271(100); S278(100); S288(99); S295(100); S326(100)]	1	1.06576	1.0109	1.05353	0.971127	0.952864	1.2633	1.1631	1.31977	8	8	8	8	8	8	8	8	8	0.931	0	139.392	8
FALSE	High	Master Protein	Q6ZKE8	Os08g0178300 protein OS=Oryza sativa subsp. japonica GN=OJ1120_C08.24-1 PE=4 SV=1	0	35.6209	14.6739	8	51	8	1	552	62.935	9.58	High	High	High	High	High	High	High	High	High	Phospho [S605(100); S610(100)]	1	1.15406	1.1406	1.09164	1.11288	1.10728	1.57013	1.36864	1.71666	4	4	4	4	4	4	4	4	4	0.343	0	35.2948	2
FALSE	High	Master Protein	Q10SU9	Os03g0110400 protein OS=Oryza sativa subsp. japonica GN=LOC_Os03g01970 PE=4 SV=1	0	35.5922	10.0313	2	9	2	1	638	71.479	5.43	High	High	High	High	High	High	High	High	High	Phospho [S118(99.1)]	1	0.964255	0.937463	1.08187	1.02843	1.05646	1.20174	1.21592	1.19069	2	2	2	2	2	2	2	2	2	0.585	0	52.1958	1
FALSE	High	Master Protein	Q5Z7Y7	GCIP-interacting family protein-like OS=Oryza sativa subsp. japonica GN=Os06g0711600 PE=2 SV=1	0	35.4741	9.41176	1	20	1	1	340	38.984	6.73	High	High	High	High	High	High	High	High	High	Phospho [S316(100); S368(100); S486(100); T489(100)]	1	1.00993	1.0376	1.09653	0.960069	0.962637	1.27371	1.21977	1.29805	4	4	4	4	4	4	4	4	4	0.512	0	93.2842	3
FALSE	High	Master Protein	Q0J0H3	Os09g0509300 protein OS=Oryza sativa subsp. japonica GN=Os09g0509300 PE=2 SV=1	0	35.4051	7.17703	3	29	3	1	627	69.004	7.99	High	High	High	High	High	High	High	High	High	Phospho [S232(99.6); S1020(100); S1026(100); S1040(100)]	1	0.846514	0.679017	0.612765	0.581068	0.587355	0.470659	0.483104	0.597153	3	3	3	3	3	3	3	3	3	0.286	0	102.28	3
FALSE	High	Master Protein	Q84QV5	Os08g0525700 protein OS=Oryza sativa subsp. japonica GN=OJ1191_A10.120 PE=4 SV=1	0	35.292	3.65511	3	30	3	1	1067	113.387	4.53	High	High	High	High	High	High	High	High	High	Phospho [S463(100); S531(100)]	1	0.970345	1.10817	1.09262	1.06864	1.10141	1.26235	1.32061	1.34631	4	4	4	4	4	4	4	4	4	1.818	0	131.094	2
FALSE	High	Master Protein	Q2R0E9	Sodium/hydrogen exchanger OS=Oryza sativa subsp. japonica GN=OsNHX2 PE=2 SV=1	0	35.2818	4.58716	2	41	2	1	545	59.876	8.13	High	High	High	High	High	High	High	High	High	Phospho [S277(99.3); S290(100)]	1	1.11143	0.942232	1.03398	0.819326	0.834611	0.877869	0.79621	0.931317	3	3	3	3	3	3	3	3	3	0.468	0	41.6212	3
FALSE	High	Master Protein	Q10CW0	Os03g0748400 protein OS=Oryza sativa subsp. japonica GN=Os03g0748400 PE=2 SV=1	0	35.2027	10.0244	3	9	3	1	409	45.062	6.15	High	High	High	High	High	High	High	High	High	Phospho [S132(100); S255(100); S259(100); S270(100); S282(100)]	1	1.08707	0.856401	0.975342	0.971127	0.820929	1.09852	1.01423	1.22085	5	5	5	5	5	5	5	5	5	0.409	0	51.3925	3
FALSE	High	Master Protein	Q7XUF4	Cyclin-dependent kinase G-2 OS=Oryza sativa subsp. japonica GN=CDKG-2 PE=2 SV=2	0	35.1381	6.47887	3	17	3	1	710	79.833	6.57	High	High	High	High	High	High	High	High	High	Phospho [S18(100); S220(100); S245(100)]	1	1.11549	0.917436	1.4161	1.10182	1.16982	1.12882	1.17174	1.13881	4	4	4	4	4	4	4	4	4	1.336	0	71.182	3
FALSE	High	Master Protein	A3AYP1	Os04g0679400 protein OS=Oryza sativa subsp. japonica GN=Os04g0679400 PE=4 SV=1	0	34.9659	16.2791	3	19	3	1	258	27.773	6.52	High	High	High	High	High	High	High	High	High	Phospho [T137(100)]	1	1.11752	0.873567	1.18253	1.13198	1.05646	1.07579	1.1948	1.05075	2	2	2	2	2	2	2	2	2	0.311	0	154.583	1
FALSE	High	Master Protein	Q6AVI0	Zinc finger BED domain-containing protein RICESLEEPER 2 OS=Oryza sativa subsp. japonica GN=Os03g0733400 PE=2 SV=1	0	34.9055	3.04709	1	32	1	1	722	80.924	5.33	High	High	High	High	High	High	High	High	High	Phospho [S32(100); S121(100); S140(100); S750(100)]	1	1.13681	1.0109	1.06916	0.966101	0.947977	1.08621	1.13045	1.21843	7	7	7	7	7	7	7	7	7	0.348	0	126.291	5
FALSE	High	Master Protein	Q5ZAJ0	Respiratory burst oxidase homolog protein B OS=Oryza sativa subsp. japonica GN=RBOHB PE=1 SV=1	0	34.8644	7.07182	5	47	5	1	905	101.694	9.28	High	High	High	High	High	High	High	High	High	Phospho [S493(100); S524(100); S841(99.8)]	1	1.13681	0.980379	1.04473	0.954037	0.942114	1.08147	1.09779	1.13278	5	5	5	5	5	5	5	5	5	0.341	0	166.083	4
FALSE	High	Master Protein	Q60EX6	Serine/threonine-protein phosphatase BSL1 homolog OS=Oryza sativa subsp. japonica GN=BSL1 PE=2 SV=1	0	34.7933	4.41676	4	52	4	1	883	96.221	6.34	High	High	High	High	High	High	High	High	High	Phospho [S208(100); T242(100); S251(97.8); S255(100)]	1	1.09824	0.991823	1.14246	0.994249	0.945045	1.52751	1.29852	1.5152	4	4	4	4	4	4	4	4	4	1.738	0	66.6318	2
FALSE	High	Master Protein	A0A0P0XKY3	Os09g0299200 protein (Fragment) OS=Oryza sativa subsp. japonica GN=Os09g0299200 PE=4 SV=1	0	34.7652	13.5762	2	23	2	1	302	33.084	6.62	High	High	High	High	High	High	High	High	High	Phospho [T165(100)]	1	0.913505	1.04904	1.10434	1.27473	1.24312	1.12788	1.1948	1.18707	6	6	6	6	6	6	6	6	6	2.162	0	69.132	5
FALSE	High	Master Protein	Q943K1	Os01g0869800 protein OS=Oryza sativa subsp. japonica GN=Os01g0869800 PE=2 SV=1	0	34.4267	16.791	5	22	5	1	268	27.886	6.87	High	High	High	High	High	High	High	High	High	Phospho [S68(100)]	1	1.07997	0.931741	1.27049	1.34812	1.10141	1.35516	1.31005	1.35596	1	1	1	1	1	1	1	1	1	0.585	0	51.9638	1
FALSE	High	Master Protein	Q2QT64	Expressed protein OS=Oryza sativa subsp. japonica GN=Os12g0405200 PE=2 SV=1	0	33.9654	5.72207	1	10	1	1	367	40.487	9.32	High	High	High	High	High	High	High	High	High	Phospho [S233(100); S857(100)]	1	0.9876	1.01185	0.973387	0.955042	0.915727	1.06348	1.06033	1.12796	5	5	5	5	5	5	5	5	5	0.274	0	49.6967	4
FALSE	High	Master Protein	Q84UQ1	DEAD-box ATP-dependent RNA helicase 42 OS=Oryza sativa subsp. japonica GN=Os08g0159900 PE=2 SV=1	0	33.8293	3.81316	4	15	4	1	1049	117.659	6.05	High	High	High	High	High	High	High	High	High	Phospho [S106(100); S248(100); S462(100)]	1	0.952075	0.809671	0.98316	0.832395	0.890317	1.01802	0.992141	1.2317	7	7	7	7	7	7	7	7	7	1.212	0	67.811	5
FALSE	High	Master Protein	Q2R2Z3	Expressed protein OS=Oryza sativa subsp. japonica GN=Os11g0544600 PE=2 SV=1	0	33.6959	11.2527	5	28	5	1	471	52.088	5.36	High	High	High	High	High	High	High	High	High	Phospho [S375(98.8); S390(100); S393(100)]	1	1.00384	0.989915	1.04473	1.04854	1.10923	1.29644	1.23225	1.39336	4	4	4	4	4	4	4	4	4	0.63	0	48.9283	3
FALSE	High	Master Protein	A0A0P0UYD8	Os01g0155400 protein (Fragment) OS=Oryza sativa subsp. japonica GN=Os01g0155400 PE=4 SV=1	0	33.4219	8.98876	3	15	3	1	445	51.288	5.17	High	High	High	High	High	High	High	High	High	Phospho [S57(100); S94(100); S637(100)]	1	1.00384	0.963212	0.912795	0.903772	0.871748	1.072	0.986378	1.1738	4	4	4	4	4	4	4	4	4	0.141	0	38.8817	3
FALSE	High	Master Protein	Q10MG9	Phytochrome B OS=Oryza sativa subsp. japonica GN=PHYB PE=2 SV=1	0	33.2297	4.26985	3	9	3	1	1171	128.412	6.38	High	High	High	High	High	High	High	High	High	Phospho [T310(100); T318(98.5)]	1	1.01805	1.11962	1.06232	1.14304	1.07796	1.22921	1.16598	1.21843	6	6	6	6	6	6	6	6	6	1.512	0	183.005	3
FALSE	High	Master Protein	A0A0N7KG12	Os02g0729400 protein (Fragment) OS=Oryza sativa subsp. japonica GN=Os02g0729400 PE=4 SV=1	0	33.1636	6.94864	3	71	3	1	331	34.035	9.33	High	High	High	High	High	High	High	High	High	Phospho [S1413(100)]	1	1.03531	0.934602	0.85318	0.805252	0.79161	0.958364	0.873046	0.992842	6	6	6	6	6	6	6	6	6	0.148	0	50.3301	3
FALSE	High	Master Protein	Q7XQE6	OSJNBa0070O11.2 protein OS=Oryza sativa subsp. japonica GN=Os04g0645100 PE=4 SV=2	0	32.9109	2.7907	3	20	3	1	1720	189.171	7.25	High	High	High	High	High	High	High	High	High	Phospho [S43(99.3); S227(100); S229(100); S250(100); S253(100); S619(100); S624(99); S638(100); S642(99.3); S700(100); S704(100)]	1	1.082	0.949861	0.996842	0.824352	0.887385	0.835254	0.824063	0.938555	7	7	7	7	7	7	7	7	7	0.585	0	50.7562	7
FALSE	High	Master Protein	Q0JD14	Os04g0437600 protein OS=Oryza sativa subsp. japonica GN=Os04g0437600 PE=2 SV=1	0	32.6967	11.4407	7	18	7	1	708	76.928	8.34	High	High	High	High	High	High	High	High	High	Phospho [S749(99.7); S763(99.5)]	1	1.03328	0.985147	1.08773	0.963085	0.99391	1.17901	1.15638	1.21964	4	4	4	4	4	4	4	4	4	0.182	0	31.8506	3
FALSE	High	Master Protein	Q2QNI2	Os12g0564600 protein OS=Oryza sativa subsp. japonica GN=LOC_Os12g37720 PE=4 SV=2	0	32.5793	2.93356	3	13	3	1	1159	128.376	7.46	High	High	High	High	High	High	High	High	High	Phospho [S150(98.8); S654(99.3); S1009(100); S1142(100); S1589(100)]	1	1.12361	1.05286	1.07991	0.91282	0.954818	1.23489	1.14485	1.27875	5	5	5	5	5	5	5	5	5	0.147	0	79.5433	5
FALSE	High	Master Protein	B9FXV5	Eukaryotic translation initiation factor 4G OS=Oryza sativa subsp. japonica GN=Os07g0555200 PE=2 SV=2	0	32.5074	4.01786	5	35	5	1	1792	193.414	8.09	High	High	High	High	High	High	High	High	High	Phospho [S554(100)]	1	1.03226	0.974657	1.08773	1.03547	1.12096	1.28792	1.22841	1.26307	2	2	2	2	2	2	2	2	2	0.245	0	19.3073	1
FALSE	High	Master Protein	Q6K3F7	Os02g0812400 protein OS=Oryza sativa subsp. japonica GN=Os02g0812400 PE=2 SV=1	0	32.4349	3.27869	1	4	1	1	732	81.41	4.72	High	High	High	High	High	High	High	High	High	Phospho [S293(100); S761(100); S774(100); S776(100); S786(100)]	1	0.96527	0.858308	0.878589	0.748954	0.720267	0.812526	0.789487	0.861348	6	6	6	6	6	6	6	6	6	0.602	2	84.1534	5
FALSE	High	Master Protein	Q6ZLP6	Os07g0150500 protein OS=Oryza sativa subsp. japonica GN=Os07g0150500 PE=4 SV=1	0	32.4307	6.46872	5	29	4	1	943	99.797	5.17	High	High	High	High	High	High	High	High	High	Phospho [S40(100); S87(100)]	1	1.02211	1.05953	1.1493	1.14304	1.09457	1.20648	1.22745	1.31132	3	3	3	3	3	3	3	3	3	0.403	0	109.452	3
FALSE	High	Master Protein	Q2QMP4	LIM domain-containing protein, putative, expressed OS=Oryza sativa subsp. japonica GN=Os12g0596800 PE=2 SV=2	0	32.4032	8.23045	3	29	3	1	486	54.98	5.96	High	High	High	High	High	High	High	High	High	Phospho [S159(100); S242(99.3)]	1	1.07489	0.930788	0.891294	0.864565	0.839497	1.00856	0.986378	1.16053	4	4	4	4	4	4	4	4	4	0.197	0	50.7248	3
FALSE	High	Master Protein	Q6AT26	Probable cellulose synthase A catalytic subunit 1 [UDP-forming] OS=Oryza sativa subsp. japonica GN=CESA1 PE=2 SV=1	0	32.3846	4.64684	3	15	3	1	1076	121.19	7.06	High	High	High	High	High	High	High	High	High	Phospho [S166(100); S173(100); S174(100); S498(100)]	1	1.01399	1.00804	0.92159	1.0043	1.04473	1.22731	1.13525	1.17259	7	7	7	7	7	7	7	7	7	0.896	0	59.0023	5
FALSE	High	Master Protein	Q688R3	Zinc finger CCCH domain-containing protein 33 OS=Oryza sativa subsp. japonica GN=Os05g0128200 PE=2 SV=1	0	32.3122	6.98835	5	29	5	1	601	63.195	8.35	High	High	High	High	High	High	High	High	High	Phospho [S86(100)]	1	1.09113	1.02043	1.05841	0.871602	0.92159	1.20837	1.0709	1.19431	1	1	1	1	1	1	1	1	1	4.623	0	79.8955	1
FALSE	High	Master Protein	Q5Z9N4	Os06g0717300 protein OS=Oryza sativa subsp. japonica GN=Os06g0717300 PE=4 SV=1	0	31.9871	23.8095	1	18	1	1	105	11.209	4.48	High	High	High	High	High	High	High	High	High	Phospho [S220(100); S222(100)]	1	1.03937	0.938417	1.08773	1.01436	1.00368	1.4366	1.30909	1.45609	3	3	3	3	3	3	3	3	3	0.585	0	74.2222	2
FALSE	High	Master Protein	A0A0N7KFQ9	Os02g0631500 protein OS=Oryza sativa subsp. japonica GN=Os02g0631500 PE=4 SV=1	0	31.9418	11.9318	2	23	2	1	352	38.996	4.69	High	High	High	High	High	High	High	High	High	Phospho [S83(100)]	1	1.14594	1.06907	1.17764	1.03949	0.927454	0.794533	0.825023	0.857729	2	2	2	2	2	2	2	2	2	1.31	0	46.6872	1
FALSE	High	Master Protein	Q7XUV4	OSJNBa0072F16.12 protein OS=Oryza sativa subsp. japonica GN=Os04g0461100 PE=2 SV=2	0	31.6905	9.28962	1	10	1	1	183	19.943	7.34	High	High	High	High	High	High	High	High	High	Phospho [S81(100); S323(100)]	1	0.933805	0.963212	1.28905	1.68691	1.6614	2.06541	2.44914	2.50925	3	3	3	3	3	3	3	3	3	0.848	0	72.7367	2
FALSE	High	Master Protein	Q84M73	Expressed protein OS=Oryza sativa subsp. japonica GN=Os03g0857400 PE=2 SV=1	0	31.5622	8.95062	2	17	2	1	324	35.97	5.07	High	High	High	High	High	High	High	High	High	Phospho [S184(100); S656(100); S768(100)]	1	0.96324	0.905038	0.891294	0.86557	0.814088	0.92806	0.940277	0.971127	3	3	3	3	3	3	3	3	3	0.224	0	27.7862	3
FALSE	High	Master Protein	Q8LHQ6	Myosin heavy chain-like OS=Oryza sativa subsp. japonica GN=P0560B08.109 PE=4 SV=1	0	31.4845	5.75275	3	12	3	1	817	91.206	5.15	High	High	High	High	High	High	High	High	High	Phospho [S129(100)]	1	1.09722	0.981332	1.07014	0.997265	0.92159	0.982039	0.918187	1.01456	3	3	3	3	3	3	3	3	3	12.895	0	124.477	3
FALSE	High	Master Protein	A0A0P0WMY2	Os05g0445500 protein (Fragment) OS=Oryza sativa subsp. japonica GN=Os05g0445500 PE=3 SV=1	0	31.3561	19.4245	3	41	2	1	139	14.419	4.27	High	High	High	High	High	High	High	High	High	Phospho [S23(100); S88(100)]	1	1.08403	1.07098	1.35844	1.13801	1.15125	1.96787	1.73649	1.98206	5	5	5	5	5	5	5	5	5	2.162	0	165.043	4
FALSE	High	Master Protein	Q5N8I8	Os01g0700000 protein OS=Oryza sativa subsp. japonica GN=Os01g0700000 PE=2 SV=1	0	31.2697	16.9231	4	48	4	1	260	27.405	4.75	High	High	High	High	High	High	High	High	High	Phospho [S71(100)]	1	1.14696	0.852586	0.876635	0.819326	0.821906	0.908173	0.962367	1.05195	4	4	4	4	4	4	4	4	4	0.585	0	51.5311	2
FALSE	High	Master Protein	Q69T31	Cytosolic invertase 1 OS=Oryza sativa subsp. japonica GN=CINV1 PE=1 SV=1	0	31.1421	5.51601	2	20	2	1	562	63.41	6.8	High	High	High	High	High	High	High	High	High	Phospho [T348(100); S350(100); S367(100)]	1	1.20684	1.09673	1.31544	1.35515	1.26853	1.21027	1.09683	1.10745	4	4	4	4	4	4	4	4	4	0.308	0	42.6683	3
FALSE	High	Master Protein	A3CE59	Expressed protein OS=Oryza sativa subsp. japonica GN=Os12g0105300 PE=4 SV=1	0	31.1293	4.09042	3	15	3	1	929	103.859	6.92	High	High	High	High	High	High	High	High	High	Phospho [S674(100); S697(99.6)]	1	1.19771	1.01662	0.860998	0.584084	0.655766	0.616497	0.545533	0.653852	6	6	6	6	6	6	6	6	6	0.308	0	41.0327	5
FALSE	High	Master Protein	Q0JAK9	OSJNBa0009P12.17 protein OS=Oryza sativa subsp. japonica GN=Os04g0592400 PE=4 SV=1	0	31.0632	5.51181	5	14	5	1	762	83.861	4.96	High	High	High	High	High	High	High	High	High	Phospho [S21(100); S39(100)]	1	1.06576	1.3113	0.642084	0.565988	0.552172	0.50191	0.482144	0.564581	3	3	3	3	3	3	3	3	3	1.054	0	131.934	2
FALSE	High	Master Protein	Q5WA73	Os06g0163300 protein OS=Oryza sativa subsp. japonica GN=Os06g0163300 PE=2 SV=1	0	30.8679	11.1801	2	33	2	1	322	34.689	9.32	High	High	High	High	High	High	High	High	High	Phospho [T323(100)]	1	1.00181	1.0109	1.05646	1.07266	1.09946	1.16386	1.1948	1.22326	6	6	6	6	6	6	6	6	6	0.61	0	36.8833	6
FALSE	High	Master Protein	Q6ZI53	Elongation factor Tu OS=Oryza sativa subsp. japonica GN=OJ1126_D09.31-1 PE=2 SV=1	0	30.8656	15.4176	6	13	6	1	467	50.382	6.64	High	High	High	High	High	High	High	High	High	Phospho [S46(100)]	1	1.03937	1.0376	1.07405	0.920862	0.868816	0.952682	0.875927	0.956651	4	4	4	4	4	4	4	4	4	6.197	0	68.7838	3
FALSE	High	Master Protein	Q9FP25	Os01g0303000 protein OS=Oryza sativa subsp. japonica GN=P0035H10.18 PE=2 SV=1	0	30.8506	23.3871	3	21	3	1	124	12.825	4.7	High	High	High	High	High	High	High	High	High	Phospho [S443(99.7); S457(100)]	1	1.05459	0.920297	1.01346	0.917846	0.944068	1.14871	1.16598	1.29202	3	3	3	3	3	3	3	3	3	0.557	0	66.7969	2
FALSE	High	Master Protein	Q5Z754	Cyclin-dependent kinase F-1 OS=Oryza sativa subsp. japonica GN=CDKF-1 PE=2 SV=1	0	30.7515	6.68058	2	31	2	1	479	52.04	4.78	High	High	High	High	High	High	High	High	High	Phospho [S722(100)]	1	1.04546	0.996591	1.05646	1.02642	0.986092	1.16102	1.14965	1.19069	2	2	2	2	2	2	2	2	2	0.239	0	51.3913	2
FALSE	High	Master Protein	Q6K272	Os09g0123100 protein OS=Oryza sativa subsp. japonica GN=Os09g0123100 PE=2 SV=1	0	30.7423	2.29746	2	12	2	1	827	90.27	6.06	High	High	High	High	High	High	High	High	High	Phospho [T278(100); T482(100); S647(100)]	1	1.11651	1.08242	1.08871	0.956048	0.95775	1.23205	1.13717	1.21602	7	7	7	7	7	7	7	7	7	0.456	0	58.5238	6
FALSE	High	Master Protein	Q6K624	BRI1-KD interacting protein 135 OS=Oryza sativa subsp. japonica GN=Os02g0612800 PE=4 SV=1	0	30.7243	5.96026	6	24	6	1	755	81.309	6.13	High	High	High	High	High	High	High	High	High	Phospho [S9(100); S52(99.5)]	1	1.01501	0.711442	0.814088	0.818321	0.832656	0.541684	0.680956	0.670741	4	4	4	4	4	4	4	4	4	1.894	0	77.9938	3
FALSE	High	Master Protein	Q7G649	Expressed protein OS=Oryza sativa subsp. japonica GN=Os10g0330000 PE=2 SV=1	0	30.6402	21.2121	3	33	3	1	165	16.512	4.78	High	High	High	High	High	High	High	High	High	Phospho [S187(100); S192(100); S194(100); S202(100); S219(100); S227(100); S229(100)]	1	1.09519	1.0519	1.07503	0.984196	0.931363	1.25099	1.1535	1.23894	8	8	8	8	8	8	8	8	8	2.36	0	132.86	7
FALSE	High	Master Protein	Q7XTJ6	OSJNBa0020P07.8 protein OS=Oryza sativa subsp. japonica GN=Os04g0118900 PE=4 SV=2	0	30.637	20	7	51	7	1	245	28.766	9.94	High	High	High	High	High	High	High	High	High	Phospho [S217(100)]	1	1.08809	1.06907	1.05548	1.07367	1.0203	1.32864	1.39361	1.44644	2	2	2	2	2	2	2	2	2	1.371	0	108.403	1
FALSE	High	Master Protein	Q7XXR0	Os03g0744600 protein OS=Oryza sativa subsp. japonica GN=LOC_Os03g53270 PE=2 SV=1	0	30.4982	5.17928	1	27	1	1	251	26.416	6.52	High	High	High	High	High	High	High	High	High	Phospho [S396(100)]	1	0.8658	0.636102	0.565854	0.524771	0.51308	0.504751	0.512878	0.626106	3	3	3	3	3	3	3	3	3	0.417	0	53.3808	1
FALSE	High	Master Protein	Q6ETC4	Os02g0448400 protein OS=Oryza sativa subsp. japonica GN=Os02g0448400 PE=4 SV=1	0	30.4567	3.15985	1	16	1	1	538	60.988	6.81	High	High	High	High	High	High	High	High	High	Phospho [S956(100); S968(100); S971(99.5)]	1	1.16624	1.02329	1.01932	0.881655	0.867839	1.07011	0.985418	1.13278	4	4	4	4	4	4	4	4	4	0.308	0	126.639	3
FALSE	High	Master Protein	Q10NL9	Os03g0265700 protein OS=Oryza sativa subsp. japonica GN=Os03g0265700 PE=4 SV=1	0	30.2956	2.30548	3	35	3	1	1041	113.313	5.29	High	High	High	High	High	High	High	High	High	Phospho [S81(100)]	1	1.03023	1.0128	1.02812	0.966101	0.918658	1.1222	1.09203	1.19069	5	5	5	5	5	5	5	5	5	0.468	0	39.809	5
FALSE	High	Master Protein	Q2QU06	60 kDa chaperonin alpha subunit OS=Oryza sativa subsp. japonica GN=Os12g0277500 PE=2 SV=1	0	30.2546	10.7266	5	12	5	1	578	61.093	5.21	High	High	High	High	High	High	High	High	High	Phospho [S26(99.3); S656(100); S835(100); S839(100)]	1	1.08707	1.05858	1.22651	1.0224	1.11607	1.31822	1.22745	1.28358	3	3	3	3	3	3	3	3	3	0.157	0	48.6254	3
FALSE	High	Master Protein	Q10E10	Os03g0711800 protein OS=Oryza sativa subsp. japonica GN=Os03g0711800 PE=4 SV=1	0	30.2466	3.31492	3	17	3	1	1267	138.747	6.35	High	High	High	High	High	High	High	High	High	Phospho [S26(100); T36(99.1); T51(100)]	1	1.03125	1.08338	1.18741	1.09981	1.13757	1.33906	1.26299	1.40059	2	2	2	2	2	2	2	2	2	0.322	0	96.0885	2
FALSE	High	Master Protein	Q5Z7T2	Os06g0714200 protein OS=Oryza sativa subsp. japonica GN=OJ1136_F03.24 PE=3 SV=1	0	29.9925	6.58106	2	25	2	1	623	69.099	9.06	High	High	High	High	High	High	High	High	High	Phospho [S121(100); S136(100)]	1	1.09316	1.18256	1.1366	0.89774	0.981205	1.20174	1.01327	1.21843	5	5	5	5	5	5	5	5	5	4.012	0	36.8217	4
FALSE	High	Master Protein	Q6ESQ0	Os02g0670400 protein OS=Oryza sativa subsp. japonica GN=Os02g0670400 PE=4 SV=1	0	29.9368	22.069	4	14	4	1	145	15.756	8.19	High	High	High	High	High	High	High	High	High	Phospho [S285(100); S309(100); S433(99.6)]	1	1.11752	1.00136	1.13855	1.12293	1.04864	1.31538	1.18711	1.42472	3	3	3	3	3	3	3	3	3	0.468	0	45.6031	2
FALSE	High	Master Protein	Q5JLB5	Zinc finger CCCH domain-containing protein 12 OS=Oryza sativa subsp. japonica GN=Os01g0917400 PE=2 SV=2	0	29.9123	9.5672	2	16	2	1	439	47.821	8.59	High	High	High	High	High	High	High	High	High	Phospho [S497(100); S580(100)]	1	0.972375	0.865938	0.995865	0.955042	0.944068	1.10136	1.16118	1.25824	3	3	3	3	3	3	3	3	3	0.377	0	44.9692	2
FALSE	High	Master Protein	Q7XUK7	OSJNBa0067K08.20 protein OS=Oryza sativa subsp. japonica GN=Os04g0497900 PE=4 SV=2	0	29.6944	6.52866	2	12	2	1	628	72.559	5.52	High	High	High	High	High	High	High	High	High	Phospho [S205(100); S234(100); S256(100)]	1	1.11651	0.970842	1.09359	0.96409	0.97241	1.32769	1.23417	1.33063	7	7	7	7	7	7	7	7	7	1.31	5	82.2099	6
FALSE	High	Master Protein	Q0J8A4	Glyceraldehyde-3-phosphate dehydrogenase 1, cytosolic OS=Oryza sativa subsp. japonica GN=GAPC1 PE=1 SV=1	0	29.6381	15.727	6	31	2	1	337	36.39	7.11	High	High	High	High	High	High	High	High	High	Phospho [S96(100)]	1	1.01704	0.972749	1.03691	1.10483	1.07014	1.05969	1.06706	1.12072	5	5	5	5	5	5	5	5	5	0.823	0	28.3903	5
FALSE	High	Master Protein	Q2QSR7	Os12g0420200 protein OS=Oryza sativa subsp. japonica GN=Os12g0420200 PE=4 SV=2	0	29.5497	15.9574	5	11	5	1	376	41.507	8.53	High	High	High	High	High	High	High	High	High	Phospho [S672(100); S674(100)]	1	1.01704	1.00422	1.11216	0.958058	1.00466	1.42239	1.26587	1.53571	3	3	3	3	3	3	3	3	3	0.346	0	50.1891	2
FALSE	High	Master Protein	A0A0P0X0B1	Os06g0677700 protein OS=Oryza sativa subsp. japonica GN=Os06g0677700 PE=4 SV=1	0	29.321	2.47813	2	14	2	1	686	74.716	7.15	High	High	High	High	High	High	High	High	High	Phospho [S168(100); S190(100)]	1	1.07286	1.17111	1.04864	0.841443	0.769132	1.0114	1.05745	1.1738	4	4	4	4	4	4	4	4	4	3.217	0	38.1366	4
FALSE	High	Master Protein	Q2R176	Os11g0615200 protein OS=Oryza sativa subsp. japonica GN=LOC_Os11g40100 PE=2 SV=1	0	29.3094	21.4634	4	13	4	1	205	21.597	5.06	High	High	High	High	High	High	High	High	High	Phospho [S178(100); S192(98.7)]	1	1.12869	1.09387	1.26658	1.08372	0.999774	1.48963	1.44067	1.52244	5	5	5	5	5	5	5	5	5	0.318	0	51.9167	3
FALSE	High	Master Protein	Q6YZW8	Os08g0519800 protein OS=Oryza sativa subsp. japonica GN=Os08g0519800 PE=2 SV=1	0	29.2745	3.77734	3	23	3	1	1006	109.973	6.37	High	High	High	High	High	High	High	High	High	Phospho [S217(99.3); S221(100)]	1	1.16929	0.90027	1.24801	0.989223	0.955796	1.59664	1.39745	1.52364	5	5	5	5	5	5	5	5	5	0.487	1	39.4046	3
FALSE	High	Master Protein	Q5Z4V2	Os06g0698674 protein OS=Oryza sativa subsp. japonica GN=Os06g0698674 PE=2 SV=1	0	29.2173	10	3	12	2	1	450	48.839	6.39	High	High	High	High	High	High	High	High	High	Phospho [S812(100); S824(100)]	1	1.03734	1.02234	1.12682	1.13198	0.965569	1.01045	1.09011	0.978366	4	4	4	4	4	4	4	4	4	0.224	0	38.2707	3
FALSE	High	Master Protein	Q5TKG2	Os05g0594500 protein OS=Oryza sativa subsp. japonica GN=Os05g0594500 PE=4 SV=1	0	28.9867	3.91621	3	15	3	1	1098	118.127	8.92	High	High	High	High	High	High	High	High	High	Phospho [S70(100)]	1	1.17639	0.919343	1.55976	1.16716	1.09359	1.61558	1.48101	1.67082	3	3	3	3	3	3	3	3	3	5.813	0	32.9627	3
FALSE	High	Master Protein	Q0DK70	Os05g0188100 protein OS=Oryza sativa subsp. japonica GN=Os05g0188100 PE=2 SV=1	0	28.8804	22.4719	3	12	3	1	89	9.084	8.4	High	High	High	High	High	High	High	High	High	Phospho [S25(100); S207(100); S416(97.6)]	1	1.082	1.00041	1.05646	0.932926	0.947	1.13072	1.09491	1.1738	7	7	7	7	7	7	7	7	7	0.688	0	65.5646	4
FALSE	High	Master Protein	Q69IL3	Os09g0516300 protein OS=Oryza sativa subsp. japonica GN=Os09g0516300 PE=2 SV=1	0	28.8426	3.55556	4	28	4	1	900	97.139	7.33	High	High	High	High	High	High	High	High	High	Phospho [S140(100); S709(100); S717(100)]	1	1.2718	1.1673	0.843407	0.62128	0.595173	0.618391	0.512878	0.645408	3	3	3	3	3	3	3	3	3	0.227	0	28.313	2
FALSE	High	Master Protein	Q7XI09	COP1-interacting protein 7 (CIP7)-like protein OS=Oryza sativa subsp. japonica GN=P0030H06.103-1 PE=4 SV=1	0	28.8269	3.31695	2	10	2	1	814	90.395	6.64	High	High	High	High	High	High	High	High	High	Phospho [S404(99.5); S417(100)]	1	1.03125	0.988962	1.03984	0.982186	0.984137	1.22163	1.17078	1.35958	3	3	3	3	3	3	3	3	3	0.407	1	56.1546	2
FALSE	High	Master Protein	Q10C73	BTB/POZ domain containing protein, expressed OS=Oryza sativa subsp. japonica GN=LOC_Os03g57854 PE=2 SV=1	0	28.7038	7.19258	2	19	1	1	431	46.954	5.67	High	High	High	High	High	High	High	High	High	Phospho [S113(100)]	1	1.03226	0.964166	1.07698	0.899751	0.971432	1.49342	1.28316	1.4959	3	3	3	3	3	3	3	3	3	0.292	0	33.4244	3
FALSE	High	Master Protein	Q5QLH2	Os01g0527400 protein OS=Oryza sativa subsp. japonica GN=Os01g0527400 PE=2 SV=1	0	28.6735	9.93789	3	11	3	1	644	72.222	5.31	High	High	High	High	High	High	High	High	High	Phospho [S954(99.3)]	1	1.1835	0.933649	1.02909	0.883666	0.866862	1.11557	1.11124	1.10021	2	2	2	2	2	2	2	2	2	0.055	0	35.1991	2
FALSE	High	Master Protein	A0A0P0WEZ7	Os04g0614650 protein (Fragment) OS=Oryza sativa subsp. japonica GN=Os04g0614650 PE=4 SV=1	0	28.4935	1.89172	2	16	2	1	1533	172.947	4.69	High	High	High	High	High	High	High	High	High	Phospho [S89(99.1); S251(98); S265(100); S270(99.1); S274(99.1); S290(99.3); S295(100)]	1	1.08301	0.990869	1.09653	0.992239	0.990001	1.10515	1.12852	1.11227	6	6	6	6	6	6	6	6	6	2.455	2	46.274	4
FALSE	High	Master Protein	Q0D3Q1	Os07g0673500 protein OS=Oryza sativa subsp. japonica GN=Os07g0673500 PE=4 SV=1	0	28.146	16.2162	4	21	3	1	296	33.122	10.64	High	High	High	High	High	High	High	High	High	Phospho [S94(100); S117(100)]	1	1.16624	0.791551	1.06916	0.889697	0.774996	0.792639	0.751069	0.821538	2	2	2	2	2	2	2	2	2	0.54	0	36.9746	2
FALSE	High	Master Protein	Q6YUR8	Cold shock domain protein 1 OS=Oryza sativa subsp. japonica GN=Os02g0121100 PE=2 SV=1	0	27.9241	11.6183	2	9	2	1	241	22.709	7.06	High	High	High	High	High	High	High	High	High	Phospho [S56(100); S59(100)]	1	1.17335	0.96512	1.28612	0.984196	0.99391	0.988668	1.01231	1.07849	2	2	2	2	2	2	2	2	2	2.162	0	25.6232	2
FALSE	High	Master Protein	Q338G4	Expressed protein OS=Oryza sativa subsp. japonica GN=LOC_Os10g26540 PE=4 SV=2	0	27.7773	16.9492	2	5	2	1	118	13.002	7.5	High	High	High	High	High	High	High	High	High	Phospho [S205(100)]	1	0.925685	0.963212	1.07405	1.02039	0.93625	1.04454	1.02672	1.11589	1	1	1	1	1	1	1	1	1	0.957	0	73.8282	5
FALSE	High	Master Protein	Q7FAH2	Glyceraldehyde-3-phosphate dehydrogenase 2, cytosolic OS=Oryza sativa subsp. japonica GN=GAPC2 PE=1 SV=1	0	27.7742	13.3531	5	26	1	1	337	36.75	6.81	High	High	High	High	High	High	High	High	High	Phospho [S61(100); S107(99.6); S111(100); S138(100)]	1	0.93685	0.943185	0.817997	0.806257	0.860998	0.860823	0.907622	1.05678	4	4	4	4	4	4	4	4	4	1.154	0	47.0285	3
FALSE	High	Master Protein	Q6K4N6	Amino acid transporter-like OS=Oryza sativa subsp. japonica GN=Os02g0788800 PE=4 SV=1	0	27.7187	13.3127	3	15	3	1	323	35.409	4.87	High	High	High	High	High	High	High	High	High	Phospho [S173(100); S193(100)]	1	1.10433	0.87166	0.818974	0.708742	0.695835	0.904385	0.912424	0.991636	3	3	3	3	3	3	3	3	3	0.311	0	35.874	3
FALSE	High	Master Protein	Q10N88	ARF GAP-like zinc finger-containing protein ZIGA2, putative, expressed OS=Oryza sativa subsp. japonica GN=LOC_Os03g17020 PE=2 SV=1	0	27.5959	5.96026	3	9	3	1	453	48.853	7.11	High	High	High	High	High	High	High	High	High	Phospho [S275(100); S278(100)]	1	1.12057	1.00613	1.53436	1.02742	1.02421	0.541684	0.550336	0.50185	6	6	6	6	6	6	6	6	6	6.943	0	182.288	3
FALSE	High	Master Protein	Q7XLR1	Probable aquaporin PIP2-6 OS=Oryza sativa subsp. japonica GN=PIP2-6 PE=2 SV=2	0	27.5294	9.92908	3	77	3	1	282	29.944	8.97	High	High	High	High	High	High	High	High	High	Phospho [T881(100); S906(100); T950(100)]	1	0.998765	0.895502	0.916704	0.907793	0.904976	1.06632	1.09011	1.11107	3	3	3	3	3	3	3	3	3	0.194	0	97.0329	3
FALSE	High	Master Protein	Q7XPY2	Plasma membrane ATPase OS=Oryza sativa subsp. japonica GN=Os04g0656100 PE=2 SV=1	0	27.4754	4.4164	3	30	3	1	951	104.752	6.79	High	High	High	High	High	High	High	High	High	Phospho [S356(99.6); S370(100)]	1	1.02516	0.71621	1.01932	0.895729	0.884453	0.893968	0.922028	0.940968	3	3	3	3	3	3	3	3	3	0.585	0	50.8104	3
FALSE	High	Master Protein	A3C4S4	GDP-mannose 3,5-epimerase 1 OS=Oryza sativa subsp. japonica GN=GME-1 PE=1 SV=1	0	26.6608	8.99471	3	14	3	1	378	42.751	6.09	High	High	High	High	High	High	High	High	High	Phospho [T169(100)]	1	0.992675	0.908853	1.09164	1.03547	0.996842	1.0417	1.00175	0.938555	2	2	2	2	2	2	2	2	2	0.557	0	55.7366	3
FALSE	High	Master Protein	P41344	Ferredoxin--NADP reductase, leaf isozyme, chloroplastic OS=Oryza sativa subsp. japonica GN=Os06g0107700 PE=2 SV=1	0	26.478	9.66851	3	20	2	1	362	39.982	8.51	High	High	High	High	High	High	High	High	High	Phospho [S311(100); S329(98.3); S334(100)]	1	1.10027	0.903131	1.04278	0.92991	0.897158	1.34569	1.36191	1.3451	2	2	2	2	2	2	2	2	2	0.389	0	20.5526	2
FALSE	High	Master Protein	Q8H5M0	Os07g0585000 protein OS=Oryza sativa subsp. japonica GN=OJ1060_D03.112 PE=2 SV=1	0	26.474	9.4382	2	4	2	1	445	46.025	4.67	High	High	High	High	High	High	High	High	High	Phospho [S473(100)]	1	1.05053	0.949861	1.04766	1.01838	0.938204	1.06064	0.999825	1.1545	2	2	2	2	2	2	2	2	2	0.28	0	86.3874	1
FALSE	High	Master Protein	A0A0P0XLN5	Os09g0279000 protein (Fragment) OS=Oryza sativa subsp. japonica GN=Os09g0279000 PE=4 SV=1	0	26.2978	2.71318	1	18	1	1	516	55.216	9.31	High	High	High	High	High	High	High	High	High	Phospho [S172(99.7); S207(100)]	1	1.09418	1.0109	1.08773	0.97917	0.952864	1.22921	1.14581	1.28961	5	5	5	5	5	5	5	5	5	0.624	0	92.1919	5
FALSE	High	Master Protein	Q0IMW0	Os12g0535900 protein (Fragment) OS=Oryza sativa subsp. japonica GN=Os12g0535900 PE=4 SV=1	0	26.2767	6.34391	5	39	5	1	599	66.709	8.46	High	High	High	High	High	High	High	High	High	Phospho [S84(100)]	1	1.00587	1.05095	1.0975	1.137	1.12878	1.34285	1.23129	1.32942	2	2	2	2	2	2	2	2	2	0.501	0	24.031	2
FALSE	High	Master Protein	Q8LH03	DDRGK domain-containing protein 1 OS=Oryza sativa subsp. japonica GN=Os07g0103200 PE=2 SV=1	0	26.2274	6.62252	2	5	2	1	302	34.322	5.35	High	High	High	High	High	High	High	High	High	Phospho [S161(100); S163(100); T165(99.1); S176(100); S178(100); S191(100); S204(100); S206(100); S211(100); S217(100); S219(100); S221(100); T252(100); S254(100); S255(100)]	1	1.03125	1.03474	1.06818	1.08674	1.08969	1.39872	1.44163	1.63342	10	10	10	10	10	10	10	10	10	3.437	0	75.154	10
FALSE	High	Master Protein	Q8LHL0	Os07g0623300 protein OS=Oryza sativa subsp. japonica GN=P0524E08.112 PE=2 SV=2	0	26.0638	24	10	32	10	1	275	32.224	11.34	High	High	High	High	High	High	High	High	High	Phospho [S58(100)]	1	0.756179	0.756265	0.655766	0.859538	0.807247	0.883551	1.16694	1.3644	2	2	2	2	2	2	2	2	2	0.45	0	108.286	2
FALSE	High	Master Protein	Q67WN5	Inorganic diphosphatase, H+-translocating, vacuolar membrane OS=Oryza sativa subsp. japonica GN=P0017B12.8-1 PE=2 SV=1	0	25.9449	1.6624	2	29	2	1	782	81.71	5.41	High	High	High	High	High	High	High	High	High	Phospho [S108(100); S132(100); S134(100); S139(100); S141(98.9); S146(100); S163(97.8); S173(100)]	1	1.09113	1.06335	1.05353	1.01637	0.962637	1.18849	1.06321	1.17983	5	5	5	5	5	5	5	5	5	2.981	0	95.0429	6
FALSE	High	Master Protein	Q69KL9	Serine/arginine-rich splicing factor RSZ21A OS=Oryza sativa subsp. japonica GN=RSZ21A PE=2 SV=1	0	25.8623	28.1081	6	38	4	1	185	21.171	11.28	High	High	High	High	High	High	High	High	High	Phospho [S59(100)]	1	1.06982	0.947	1.05841	0.92991	0.928431	1.12598	1.05649	1.16777	2	2	2	2	2	2	2	2	2	0.848	0	43.9457	1
FALSE	High	Master Protein	Q6K678	Os02g0793900 protein OS=Oryza sativa subsp. japonica GN=Os02g0793900 PE=4 SV=1	0	25.7706	8.57143	1	13	1	1	210	23.998	4.89	High	High	High	High	High	High	High	High	High	Phospho [S454(99.3)]	1	1.16117	1.01853	1.09555	1.00229	1.05059	1.07674	1.14101	1.2498	4	4	4	4	4	4	4	4	4	0.557	0	35.3859	2
FALSE	High	Master Protein	Q6ZB59	Histone deacetylase OS=Oryza sativa subsp. japonica GN=Os08g0344100 PE=2 SV=1	0	25.6802	8.29694	2	26	2	1	458	50.799	5.45	High	High	High	High	High	High	High	High	High	Phospho [S32(100); S84(100); S117(100); S158(99.3); S179(100)]	1	1.1835	1.03092	0.732972	0.544877	0.569764	0.414786	0.388981	0.452389	6	6	6	6	6	6	6	6	6	0.624	0	51.7979	5
FALSE	High	Master Protein	Q8S3S1	Os02g0708400 protein OS=Oryza sativa subsp. japonica GN=49D11.11 PE=2 SV=1	0	25.6401	11.3924	5	23	5	1	711	76.904	5.22	High	High	High	High	High	High	High	High	High	Phospho [S430(100)]	1	1.03328	0.846864	0.971432	0.903772	0.937227	1.072	1.10932	1.18224	2	2	2	2	2	2	2	2	2	0.668	0	80.6023	1
FALSE	High	Master Protein	Q5ZDX8	Heterogeneous nuclear ribonucleoprotein A2/B1-like OS=Oryza sativa subsp. japonica GN=Os01g0614500 PE=4 SV=1	0	25.6181	2.90828	1	22	1	1	447	44.242	8.43	High	High	High	High	High	High	High	High	High	Phospho [S3(99.4); T22(99.4); S79(100); S382(99.5)]	1	1.11955	0.991823	1.0975	1.0033	1.00271	1.41008	1.44259	1.65393	4	4	4	4	4	4	4	4	4	0.445	0	34.9019	4
FALSE	High	Master Protein	A0A0P0WPA0	Os05g0510700 protein (Fragment) OS=Oryza sativa subsp. japonica GN=Os05g0510700 PE=4 SV=1	0	25.5543	16.8766	4	11	4	1	397	43.51	4.32	High	High	High	High	High	High	High	High	High	Phospho [S55(100)]	1	1.08606	1.06144	1.09555	0.982186	0.946023	1.23584	1.18039	1.24135	2	2	2	2	2	2	2	2	2	0.155	0	100.93	2
FALSE	High	Master Protein	Q7X6J4	OSJNBb0038F03.1 protein OS=Oryza sativa subsp. japonica GN=Os04g0543200 PE=2 SV=2	0	25.4322	1.93798	2	21	2	1	774	86.596	5.87	High	High	High	High	High	High	High	High	High	Phospho [S1118(100)]	1	1.0891	1.01185	1.09457	1.04753	0.973387	1.28887	1.21496	1.40059	3	3	3	3	3	3	3	3	3	0.116	0	21.3143	1
FALSE	High	Master Protein	Q5ICN3	Na+/H+ antiporter OS=Oryza sativa subsp. japonica GN=SOS1 PE=2 SV=1	0	25.4237	1.82927	1	7	1	1	1148	127.837	7.24	High	High	High	High	High	High	High	High	High	Phospho [S102(100); S112(100); S124(100); S533(99)]	1	1.06779	1.02139	1.06623	0.953032	0.986092	1.25288	1.12852	1.35475	4	4	4	4	4	4	4	4	4	0.245	0	37.0221	4
FALSE	High	Master Protein	Q6Z2V3	Os02g0743500 protein OS=Oryza sativa subsp. japonica GN=OJ1734_E02.18-2 PE=4 SV=1	0	25.4094	4.77048	4	16	4	1	1111	122.91	5.26	High	High	High	High	High	High	High	High	High	Phospho [S361(100); S388(100); S390(100); S767(100); S873(100)]	1	1.0891	1.05572	1.09555	1.01134	0.960682	1.13735	1.11028	1.21964	6	6	6	6	6	6	6	6	6	0.401	0	34.5225	5
FALSE	High	Master Protein	Q10Q04	Expressed protein OS=Oryza sativa subsp. japonica GN=LOC_Os03g11580 PE=4 SV=1	0	25.1287	5.82227	5	14	5	1	979	105.209	6.47	High	High	High	High	High	High	High	High	High	Phospho [S312(99.4); S332(99.2); T339(100)]	1	1.04038	0.935556	1.03202	1.01335	1.02127	1.45554	1.33502	1.60326	3	3	3	3	3	3	3	3	3	0.369	0	51.1935	2
FALSE	High	Master Protein	Q0E0H1	Os02g0551900 protein OS=Oryza sativa subsp. japonica GN=Os02g0551900 PE=2 SV=1	0	25.1065	10.7872	2	17	2	1	343	38.85	7.87	High	High	High	High	High	High	High	High	High	Phospho [S333(100); S334(100); S358(99.5); S389(99.1); S464(99.5); S539(100)]	1	1.02516	0.931741	1.11314	0.953032	0.961659	1.37789	1.3379	1.60447	5	5	5	5	5	5	5	5	5	0.532	0	23.4916	5
FALSE	High	Master Protein	Q7X776	OSJNBb0022F16.14 protein OS=Oryza sativa subsp. japonica GN=Os04g0655600 PE=4 SV=2	0	24.9911	13.6915	5	10	5	1	577	61.846	5.16	High	High	High	High	High	High	High	High	High	Phospho [S55(100); S261(98.2)]	1	1.11448	1.06621	0.981205	0.826363	0.878589	1.00003	0.957565	1.00732	4	4	4	4	4	4	4	4	4	0.35	0	32.8853	4
FALSE	High	Master Protein	A0A0P0VPQ7	Os02g0742100 protein (Fragment) OS=Oryza sativa subsp. japonica GN=Os02g0742100 PE=4 SV=1	0	24.921	4.72155	4	11	4	1	826	87.252	5.41	High	High	High	High	High	High	High	High	High	Phospho [S64(100); S662(100)]	1	1.09215	0.979425	1.00564	0.853506	0.888362	0.992456	0.86152	0.984397	5	5	5	5	5	5	5	5	5	0.417	0	87.6826	3
FALSE	High	Master Protein	B7FAK7	Os01g0595100 protein OS=Oryza sativa subsp. japonica GN=Os01g0595100 PE=2 SV=1	0	24.8592	4.34783	3	23	3	1	690	74.34	5.31	High	High	High	High	High	High	High	High	High	Phospho [S41(100); S73(100)]	1	1.17233	1.15776	0.975342	0.969117	1.02225	2.4622	2.23112	2.30296	2	2	2	2	2	2	2	2	2	0.874	0	54.0309	2
FALSE	High	Master Protein	Q94DL7	Os01g0963600 protein OS=Oryza sativa subsp. japonica GN=Os01g0963600 PE=2 SV=1	0	24.8592	20.3297	2	12	2	1	182	20.427	7.11	High	High	High	High	High	High	High	High	High	Phospho [S26(100)]	1	1.14087	1.27316	1.16103	1.03547	0.887385	0.686575	0.637736	0.670741	3	3	3	3	3	3	3	3	3	2.162	0	75.5417	2
FALSE	High	Master Protein	A0A0P0X4N7	Os07g0243150 protein (Fragment) OS=Oryza sativa subsp. japonica GN=Os07g0243150 PE=4 SV=1	0	24.841	23.0769	2	24	2	1	104	10.703	9.57	High	High	High	High	High	High	High	High	High	Phospho [S368(100)]	1	1.05764	1.02711	1.13269	1.06362	1.04668	1.21311	1.26011	1.31253	2	2	2	2	2	2	2	2	2	0.227	0	36.0664	2
FALSE	High	Master Protein	Q0E4T3	Os02g0101700 protein (Fragment) OS=Oryza sativa subsp. japonica GN=Os02g0101700 PE=4 SV=1	0	24.8376	3.62117	2	12	2	1	718	79.973	5.63	High	High	High	High	High	High	High	High	High	Phospho [S309(100); S476(100); T481(100); S506(99.2); S514(99.2); S521(100); S525(100)]	1	1.0282	1.00327	1.08284	1.02541	0.990001	1.09094	1.02768	1.14967	6	6	6	6	6	6	6	6	6	0.585	0	61.6738	4
FALSE	High	Master Protein	Q65WW0	Os05g0474900 protein OS=Oryza sativa subsp. japonica GN=Os05g0474900 PE=4 SV=1	0	24.8355	9.9278	4	23	4	1	554	62.765	7.77	High	High	High	High	High	High	High	High	High	Phospho [S117(100); S192(100)]	1	1.13884	1.04809	1.03887	0.945995	0.949932	1.2955	1.27259	1.40542	2	2	2	2	2	2	2	2	2	0.468	0	42.0706	2
FALSE	High	Master Protein	Q6ZJC9	Os08g0477800 protein OS=Oryza sativa subsp. japonica GN=Os08g0477800 PE=2 SV=1	0	24.7	7.81991	2	11	2	1	422	46.147	7.74	High	High	High	High	High	High	High	High	High	Phospho [T616(100); S634(100)]	1	0.99775	0.908853	0.966546	0.893719	0.823861	1.08431	1.01999	1.13037	3	3	3	3	3	3	3	3	3	0.433	0	66.9294	2
FALSE	High	Master Protein	Q0E2A9	Os02g0255700 protein OS=Oryza sativa subsp. japonica GN=Os02g0255700 PE=4 SV=1	0	24.6862	5.73643	2	22	2	1	645	68.525	5.67	High	High	High	High	High	High	High	High	High	Phospho [S6(99.5); T10(99.3)]	1	1.1297	1.09768	1.60374	1.55521	1.46692	1.26046	1.27355	1.23412	3	3	3	3	3	3	3	3	3	2.981	0	47.903	2
FALSE	High	Master Protein	Q0DXV3	Os02g0731600 protein (Fragment) OS=Oryza sativa subsp. japonica GN=Os02g0731600 PE=4 SV=1	0	24.686	25.9259	2	23	2	1	108	11.764	5.22	High	High	High	High	High	High	High	High	High	Phospho [S118(100); S205(100); S1083(99.4)]	1	1.18045	1.03855	1.02812	0.988218	0.941136	1.20269	1.14293	1.17138	3	3	3	3	3	3	3	3	3	0.171	0	67.7046	3
FALSE	High	Master Protein	Q0JD86	Os04g0421900 protein OS=Oryza sativa subsp. japonica GN=Os04g0421900 PE=2 SV=2	0	24.6498	3.99637	3	30	3	1	1101	122.67	6.02	High	High	High	High	High	High	High	High	High	Phospho [S240(100); T252(100); S253(100); S289(100); S314(100)]	1	1.0079	0.945093	1.03984	1.00732	0.955796	1.28508	1.24858	1.37164	8	8	8	8	8	8	8	8	8	0.668	0	31.2257	8
FALSE	High	Master Protein	Q6ZKL9	Os08g0500200 protein OS=Oryza sativa subsp. japonica GN=OJ1118_A06.14-1 PE=2 SV=1	0	24.6312	8.77193	8	15	8	1	513	59.88	9.69	High	High	High	High	High	High	High	High	High	Phospho [S23(100); S47(100); T49(100); S223(100); S229(100)]	1	1.02414	0.876428	0.944068	0.940968	0.882498	1.04644	1.09011	1.18827	3	3	3	3	3	3	3	3	3	0.374	0	38.1438	3
FALSE	High	Master Protein	Q5ZDL8	Os01g0147200 protein OS=Oryza sativa subsp. japonica GN=P0416D03.38-1 PE=4 SV=1	0	24.6027	10.3189	3	9	3	1	533	59.24	5.57	High	High	High	High	High	High	High	High	High	Phospho [S199(100); S209(94.4); S237(100)]	1	1.11448	1.12629	1.42099	1.23452	1.28124	1.35516	1.34174	1.31615	4	4	4	4	4	4	4	4	4	1.276	0	41.364	3
FALSE	High	Master Protein	Q6YS19	Os08g0282000 protein OS=Oryza sativa subsp. japonica GN=Os08g0282000 PE=2 SV=1	0	24.5628	19.7183	3	11	3	1	284	31.346	5.17	High	High	High	High	High	High	High	High	High	Phospho [S82(100)]	1	1.06677	0.982286	1.07112	0.963085	0.939182	1.1989	1.13813	1.18345	4	4	4	4	4	4	4	4	4	0.365	3	34.0363	4
FALSE	High	Master Protein	Q53NM9	DnaK-type molecular chaperone hsp70-rice OS=Oryza sativa subsp. japonica GN=LOC_Os11g47760 PE=3 SV=1	0	24.5496	7.08783	4	11	1	1	649	71.14	5.21	High	High	High	High	High	High	High	High	High	Phospho [S15(100); S29(100); S653(99.1); S655(100)]	1	1.04343	0.997545	1.05841	1.02742	1.03887	1.09189	1.15446	1.24497	7	7	7	7	7	7	7	7	7	0.399	0	40.2586	6
FALSE	High	Master Protein	A0A0P0VU40	Os03g0187100 protein OS=Oryza sativa subsp. japonica GN=Os03g0187100 PE=4 SV=1	0	24.5096	9.45274	6	23	6	1	804	88.499	6.13	High	High	High	High	High	High	High	High	High	Phospho [S145(100)]	1	0.96324	0.802041	1.10434	0.97917	0.928431	1.13829	1.10835	1.12916	3	3	3	3	3	3	3	3	3	0.468	0	49.5024	2
FALSE	High	Master Protein	Q8H7S7	Two-component response regulator ORR21 OS=Oryza sativa subsp. japonica GN=RR21 PE=2 SV=1	0	24.481	2.60492	2	14	2	1	691	73.761	6.54	High	High	High	High	High	High	High	High	High	Phospho [S291(100)]	1	1.15305	0.996591	1.01248	0.934936	0.954818	1.1525	1.0853	1.20999	2	2	2	2	2	2	2	2	2	0.52	0	91.4912	2
FALSE	High	Master Protein	Q7X6D9	OSJNBa0058K23.5 protein OS=Oryza sativa subsp. japonica GN=Os04g0618500 PE=4 SV=2	0	24.3455	5.7047	2	42	2	1	298	33.126	5.17	High	High	High	High	High	High	High	High	High	Phospho [S386(100); S666(100)]	1	1.16218	1.09577	1.05255	0.79922	0.876635	0.800215	0.766436	0.832395	2	2	2	2	2	2	2	2	2	0.365	0	98.2369	2
FALSE	High	Master Protein	Q8H811	Leucine Rich Repeat family protein, expressed OS=Oryza sativa subsp. japonica GN=OJ1743A09.16 PE=2 SV=1	0	24.3181	4.14815	2	33	1	1	675	70.708	7.05	High	High	High	High	High	High	High	High	High	Phospho [S295(100); S296(100); S422(98.5)]	1	1.04241	1.04332	1.09848	0.984196	1.00564	1.21595	1.26203	1.31494	3	3	3	3	3	3	3	3	3	0.334	0	33.9637	3
FALSE	High	Master Protein	Q5QNL2	DNA polymerase delta p66 subunit-like OS=Oryza sativa subsp. japonica GN=P0451C06.10-1 PE=2 SV=1	0	24.2782	8.39844	3	18	3	1	512	55.246	8.79	High	High	High	High	High	High	High	High	High	Phospho [S393(100)]	1	1.25658	1.2846	0.850248	0.766045	0.741768	0.826731	0.795249	0.85049	2	2	2	2	2	2	2	2	2	0.292	0	30.721	1
FALSE	High	Master Protein	Q2QS14	UDP-glucose 6-dehydrogenase 4 OS=Oryza sativa subsp. japonica GN=UGD4 PE=2 SV=1	0	24.1852	3.75	1	9	1	1	480	52.821	6.13	High	High	High	High	High	High	High	High	High	Phospho [S48(100); S49(100); S512(100)]	1	1.10027	1.07384	1.13855	0.993244	0.992933	1.30402	1.18807	1.46091	3	3	3	3	3	3	3	3	3	0.239	0	28.0601	2
FALSE	High	Master Protein	Q0DNZ7	Os03g0725100 protein (Fragment) OS=Oryza sativa subsp. japonica GN=Os03g0725100 PE=4 SV=1	0	24.1169	4.99244	2	7	2	1	661	76.871	9.17	High	High	High	High	High	High	High	High	High	Phospho [S77(100)]	1	1.11955	1.03665	1.18741	1.14002	1.17471	1.32012	1.3283	1.50555	2	2	2	2	2	2	2	2	2	0.205	0	30.1904	2
FALSE	High	Master Protein	Q8H903	60 kDa chaperonin OS=Oryza sativa subsp. japonica GN=Os10g0462900 PE=2 SV=1	0	24.1012	5.92334	2	8	2	1	574	60.812	5.87	High	High	High	High	High	High	High	High	High	Phospho [S210(100)]	1	1.08403	0.977518	1.07209	0.949011	1.03398	1.21879	1.20152	1.29564	2	2	2	2	2	2	2	2	2	1.154	0	64.4012	2
FALSE	High	Master Protein	Q9FVZ7	Membrane steroid binding protein 1, putative, expressed OS=Oryza sativa subsp. japonica GN=Os10g0502600 PE=2 SV=1	0	24.0708	14.6552	2	81	2	1	232	24.619	4.59	High	High	High	High	High	High	High	High	High	Phospho [S287(100); S360(100); S773(100)]	1	1.09621	1.04714	0.970455	0.994249	1.06428	1.29076	1.22745	1.39215	2	2	2	2	2	2	2	2	2	0.431	0	51.6719	3
FALSE	High	Master Protein	Q10CF1	Expressed protein OS=Oryza sativa subsp. japonica GN=Os03g0785300 PE=4 SV=1	0	24.0227	4.13574	3	18	2	1	943	99.998	5.1	High	High	High	High	High	High	High	High	High	Phospho [S8(100)]	1	1.05358	1.09959	1.19035	1.1169	1.07209	1.24436	1.13621	1.2317	3	3	3	3	3	3	3	3	3	0.546	0	61.4537	1
FALSE	High	Master Protein	Q6K6D3	Os02g0502500 protein OS=Oryza sativa subsp. japonica GN=Os02g0502500 PE=2 SV=1	0	23.9645	1.9802	1	21	1	1	707	78.374	6.05	High	High	High	High	High	High	High	High	High	Phospho [S970(100)]	1	1.04952	1.06239	1.04766	1.02541	0.955796	1.26993	1.22457	1.35596	1	1	1	1	1	1	1	1	1	0.078	0	61.8402	1
FALSE	High	Master Protein	Q6H547	Os02g0523500 protein OS=Oryza sativa subsp. japonica GN=Os02g0523500 PE=4 SV=1	0	23.7628	2.12982	1	15	1	1	986	108.115	6.89	High	High	High	High	High	High	High	High	High	Phospho [S46(98.4); S375(100)]	1	0.852605	1.00899	0.847316	1.04854	0.937227	1.19985	1.214	1.13761	3	3	3	3	3	3	3	3	3	0.509	0	59.0036	2
FALSE	High	Master Protein	Q2QX49	CBS domain-containing protein, putative, expressed OS=Oryza sativa subsp. japonica GN=Os12g0169400 PE=4 SV=1	0	23.6241	6.08856	2	24	2	1	542	58.267	6.96	High	High	High	High	High	High	High	High	High	Phospho [S86(100)]	1	0.763284	0.631333	0.649902	0.695673	0.648925	0.460242	0.542652	0.632138	3	3	3	3	3	3	3	3	3	2.594	0	50.9683	2
FALSE	High	Master Protein	Q0J8M2	Ferredoxin-1, chloroplastic OS=Oryza sativa subsp. japonica GN=ADI1 PE=1 SV=1	0	23.6125	17.2662	2	23	2	1	139	14.941	4.56	High	High	High	High	High	High	High	High	High	Phospho [S346(100); S349(100); S556(100)]	1	1.07083	0.967027	1.08675	1.10885	0.985115	1.3561	1.34174	1.60206	2	2	2	2	2	2	2	2	2	0.199	0	16.0099	2
FALSE	High	Master Protein	Q8H991	Os06g0229300 protein OS=Oryza sativa subsp. japonica GN=HAZ1 PE=2 SV=1	0	23.3253	5.68182	2	4	2	1	792	87.253	5.29	High	High	High	High	High	High	High	High	High	Phospho [T147(100)]	1	1.25658	0.992776	1.35942	1.30087	1.09262	1.4366	1.44355	1.43075	3	3	3	3	3	3	3	3	3	0.557	0	60.1149	3
FALSE	High	Master Protein	P35683	Eukaryotic initiation factor 4A-1 OS=Oryza sativa subsp. japonica GN=Os06g0701100 PE=2 SV=2	0	23.2721	7.97101	3	24	3	1	414	47.058	5.57	High	High	High	High	High	High	High	High	High	Phospho [S396(100); S449(99.4)]	1	1.0211	0.932695	1.06232	0.870597	0.97241	1.00193	1.03152	1.08453	3	3	3	3	3	3	3	3	3	0.19	0	24.4324	3
FALSE	High	Master Protein	Q337B2	Os10g0518800 protein OS=Oryza sativa subsp. japonica GN=LOC_Os10g37480 PE=4 SV=2	0	23.2527	5.12821	3	15	3	1	741	81.986	6.47	High	High	High	High	High	High	High	High	High	Phospho [S251(100); S299(100); S481(100); S943(99.6); S943(100); S943(99.6); S943(99.5); S943(100); S943(100); S943(100); S943(99.7); S943(100); S943(100); S943(99.6)]	1	1.12869	0.956537	0.963614	0.855517	0.897158	1.10894	1.07282	1.10021	5	5	5	5	5	5	5	5	5	0.264	0	40.4865	4
FALSE	High	Master Protein	Q10M67	Expressed protein OS=Oryza sativa subsp. japonica GN=LOC_Os03g20530 PE=4 SV=1	0	23.227	8.54093	4	16	4	1	843	95.188	6.49	High	High	High	High	High	High	High	High	High	Phospho [S189(100); S236(100); S239(100)]	1	1.11651	0.947	1.12194	0.965096	1.00759	1.1364	1.22169	1.2317	3	3	3	3	3	3	3	3	3	0.292	0	53.0944	2
FALSE	High	Master Protein	Q2QTN6	Expressed protein OS=Oryza sativa subsp. japonica GN=Os12g0288600 PE=4 SV=2	0	23.1389	5.88235	2	14	2	1	561	62.281	7.09	High	High	High	High	High	High	High	High	High	Phospho [T52(100); S56(99.4); S65(100)]	1	1.00486	1.01662	1.09848	1.00832	1.0115	1.01045	1.01135	1.03386	5	5	5	5	5	5	5	5	5	3.329	0	422.194	3
FALSE	High	Master Protein	Q0DI98	Os05g0406000 protein (Fragment) OS=Oryza sativa subsp. japonica GN=Os05g0406000 PE=4 SV=1	0	23.1318	10.9195	3	149	3	1	174	19.523	7.23	High	High	High	High	High	High	High	High	High	Phospho [T548(100); S623(100); S715(100)]	1	0.990645	1.10054	0.891294	0.858533	0.792587	0.996244	0.995022	1.12916	4	4	4	4	4	4	4	4	4	0.299	0	39.9961	4
FALSE	High	Master Protein	Q0J7W9	Os08g0157600 protein OS=Oryza sativa subsp. japonica GN=Os08g0157600 PE=4 SV=1	0	23.0431	8.34492	4	17	4	1	719	78.472	5.95	High	High	High	High	High	High	High	High	High	Phospho [S368(100); S370(100)]	1	1.07489	1.1549	1.27635	1.41346	1.20794	1.483	1.49734	1.46212	1	1	1	1	1	1	1	1	1	0.501	0	49.3099	1
FALSE	High	Master Protein	A0A0P0VP27	Os02g0728300 protein (Fragment) OS=Oryza sativa subsp. japonica GN=Os02g0728300 PE=4 SV=1	0	22.9747	5.02646	1	11	1	1	378	43.753	8.43	High	High	High	High	High	High	High	High	High	Phospho [S173(100); S363(100)]	1	1.21902	0.995637	1.19523	0.984196	0.988046	1.33716	1.2409	1.35717	3	3	3	3	3	3	3	3	3	0.227	0	38.8073	3
FALSE	High	Master Protein	Q10NB4	Clathrin assembly protein, putative, expressed OS=Oryza sativa subsp. japonica GN=Os03g0275500 PE=2 SV=1	0	22.9564	6.45161	3	11	3	1	651	71.994	5.64	High	High	High	High	High	High	High	High	High	Phospho [S617(99.2); S618(100); S623(100)]	1	1.03734	1.01185	1.06818	1.05557	1.0115	1.31538	1.24474	1.51399	2	2	2	2	2	2	2	2	2	0.212	0	32.7218	2
FALSE	High	Master Protein	Q60EV1	Os05g0241000 protein OS=Oryza sativa subsp. japonica GN=Os05g0241000 PE=2 SV=1	0	22.8555	2.84006	2	11	2	1	669	74.424	4.81	High	High	High	High	High	High	High	High	High	Phospho [S239(99); S247(100)]	1	1.04749	0.999452	1.01737	0.950016	0.92159	1.04265	1.04304	1.04472	2	2	2	2	2	2	2	2	2	0.266	0	139.568	1
FALSE	High	Master Protein	Q6K8D9	Os02g0759800 protein OS=Oryza sativa subsp. japonica GN=Os02g0759800 PE=4 SV=1	0	22.8454	3.29489	1	33	1	1	607	67.438	9.17	High	High	High	High	High	High	High	High	High	Phospho [S21(100)]	1	1.00181	1.01376	0.971432	0.895729	0.855134	0.947947	0.971011	0.997668	1	1	1	1	1	1	1	1	1	0.359	0	74.5921	1
FALSE	High	Master Protein	B7EFQ5	Os04g0480400 protein OS=Oryza sativa subsp. japonica GN=Os04g0480400 PE=2 SV=1	0	22.7695	8.36364	1	25	1	1	275	30.274	6.04	High	High	High	High	High	High	High	High	High	Phospho [S236(100)]	1	0.850574	0.71621	0.90009	0.805252	0.816042	1.08621	1.17847	1.38129	2	2	2	2	2	2	2	2	2	0.25	0	25.7255	1
FALSE	High	Master Protein	Q5VMI1	Os06g0288100 protein OS=Oryza sativa subsp. japonica GN=Os06g0288100 PE=2 SV=1	0	22.6617	3.53635	1	7	1	1	509	55.288	9.39	High	High	High	High	High	High	High	High	High	Phospho [S699(100); S703(100); S789(100)]	1	1.42608	1.11103	1.04864	0.86557	0.879567	0.771805	0.852876	0.762425	4	4	4	4	4	4	4	4	4	0.278	0	74.7808	3
FALSE	High	Master Protein	Q6I5K0	Os05g0465100 protein OS=Oryza sativa subsp. japonica GN=Os05g0465100 PE=2 SV=1	0	22.6477	3.13253	3	25	3	1	830	93.283	4.79	High	High	High	High	High	High	High	High	High	Phospho [S58(100)]	1	1.1297	0.786782	1.02518	0.858533	0.789655	1.02939	0.869204	1.00973	1	1	1	1	1	1	1	1	1	1.371	0	21.5185	1
FALSE	High	Master Protein	Q10LX5	Expressed protein OS=Oryza sativa subsp. japonica GN=LOC_Os03g21370 PE=2 SV=1	0	22.5488	15.1724	1	5	1	1	145	16.412	9.54	High	High	High	High	High	High	High	High	High	Phospho [S23(100); S122(99.2)]	1	1.01095	0.867845	0.881521	0.872607	0.801383	0.773699	0.889373	0.913222	3	3	3	3	3	3	3	3	3	1.61	1	20.7322	2
FALSE	High	Master Protein	Q2QXC3	BZIP transcriptional activator RSG, putative, expressed OS=Oryza sativa subsp. japonica GN=Os12g0162500 PE=4 SV=1	0	22.5032	10.3659	2	7	1	1	328	35.102	7.03	High	High	High	High	High	High	High	High	High	Phospho [T16(100); T20(99.1); S38(100)]	1	1.09113	0.962259	1.07503	0.984196	1.03202	1.16576	1.19768	1.31615	2	2	2	2	2	2	2	2	2	0.931	0	72.3772	2
FALSE	High	Master Protein	Q60EJ0	Os05g0501700 protein OS=Oryza sativa subsp. japonica GN=Os05g0501700 PE=2 SV=1	0	22.2863	9.70149	2	20	2	1	268	28.304	5.76	High	High	High	High	High	High	High	High	High	Phospho [S8(100); S10(100)]	1	1.08504	1.09768	1.14441	1.04351	0.986092	1.50005	1.40033	1.6479	2	2	2	2	2	2	2	2	2	0.274	0	175.585	1
FALSE	High	Master Protein	Q7EZ93	Os08g0517300 protein OS=Oryza sativa subsp. japonica GN=P0686C03.151 PE=2 SV=1	0	22.1994	2.47295	1	49	1	1	647	71.365	7.34	High	High	High	High	High	High	High	High	High	Phospho [S21(100); S32(98.5)]	1	0.91858	0.981332	0.989024	0.829379	0.819951	1.32391	1.13141	1.24377	3	3	3	3	3	3	3	3	3	1.61	0	27.3577	2
FALSE	High	Master Protein	Q2QPW9	Mitochondrial import inner membrane translocase subunit Tim17/Tim22/Tim23 family protein, putative, expressed OS=Oryza sativa subsp. japonica GN=LOC_Os12g33020 PE=2 SV=1	0	22.1007	11.0638	2	11	2	1	235	24.147	8.34	High	High	High	High	High	High	High	High	High	Phospho [S246(100); S251(100); S288(100); S367(100); S386(100)]	1	1.01501	1.03951	1.03593	0.924883	1.02518	1.06443	1.02864	1.10142	5	5	5	5	5	5	5	5	5	0.401	0	29.1843	5
FALSE	High	Master Protein	Q6F3A8	Os03g0788300 protein OS=Oryza sativa subsp. japonica GN=Os03g0788300 PE=4 SV=1	0	21.8926	4.72973	5	10	5	1	1184	121.323	8.54	High	High	High	High	High	High	High	High	High	Phospho [S359(100); S372(100); T380(99.6); S395(100); S398(100); S454(100)]	1	0.98557	1.00231	0.807247	0.824352	0.800406	1.12409	1.30525	1.22446	6	6	6	6	6	6	6	6	6	0.701	0	46.9617	6
FALSE	High	Master Protein	Q6H536	Os02g0229400 protein OS=Oryza sativa subsp. japonica GN=Os02g0229400 PE=2 SV=1	0	21.8293	10.3217	6	16	6	1	746	80.058	5.43	High	High	High	High	High	High	High	High	High	Phospho [S29(100)]	1	1.08098	1.03951	1.06623	1.01737	0.969478	1.0881	1.05553	1.13519	2	2	2	2	2	2	2	2	2	0.995	0	68.8907	2
FALSE	High	Master Protein	Q0DPW6	Os03g0656100 protein (Fragment) OS=Oryza sativa subsp. japonica GN=Os03g0656100 PE=4 SV=1	0	21.8039	10.3659	2	15	2	1	164	17.533	9.57	High	High	High	High	High	High	High	High	High	Phospho [S13(100); T15(100); S39(99.3); S47(100); S49(100); S79(100); S81(100)]	1	1.04444	0.973703	1.01346	0.975149	0.949932	1.07769	1.06417	1.11107	7	7	7	7	7	7	7	7	7	4.623	0	192.746	6
FALSE	High	Master Protein	Q6YW54	Os08g0385900 protein OS=Oryza sativa subsp. japonica GN=Os08g0385900 PE=2 SV=1	0	21.7901	12.9032	6	117	6	1	279	32.928	11.88	High	High	High	High	High	High	High	High	High	Phospho [S82(98.8)]	1	1.0008	1.2064	0.932341	0.925889	0.909863	1.1364	1.02095	1.20516	3	3	3	3	3	3	3	3	3	0.778	0	20.9538	2
FALSE	High	Master Protein	Q6ESR4	Dehydration-stress inducible protein 1 OS=Oryza sativa subsp. japonica GN=P0684A08.9-1 PE=2 SV=1	0	21.7663	14.1379	2	16	2	1	290	30.904	6.04	High	High	High	High	High	High	High	High	High	Phospho [S88(100)]	1	0.89016	0.810624	1.01834	0.963085	1.00955	3.29367	2.9745	4.48166	1	1	1	1	1	1	1	1	1	0.259	0	20.2042	1
FALSE	High	Master Protein	Q2R432	Os11g0490900 protein OS=Oryza sativa subsp. japonica GN=Os11g0490900 PE=2 SV=1	0	21.7418	10.7438	1	3	1	1	242	25.841	8.97	High	High	High	High	High	High	High	High	High	Phospho [S111(99.5)]	1	1.0688	0.994684	1.0115	0.927899	0.952864	1.15345	1.14197	1.23532	2	2	2	2	2	2	2	2	2	0.155	0	55.1428	1
FALSE	High	Master Protein	Q6Z0E2	Cation-chloride cotransporter 1 OS=Oryza sativa subsp. japonica GN=CCC1 PE=2 SV=1	0	21.7359	1.41557	1	28	1	1	989	108.384	6.29	High	High	High	High	High	High	High	High	High	Phospho [S507(100); S527(100)]	1	1.08301	0.919343	1.1063	1.01637	0.984137	1.21784	1.14581	1.24015	3	3	3	3	3	3	3	3	3	0.377	0	97.6766	3
FALSE	High	Master Protein	Q6L4R9	Os05g0592500 protein OS=Oryza sativa subsp. japonica GN=Os05g0592500 PE=2 SV=1	0	21.6157	3.63636	3	27	3	1	770	85.075	4.51	High	High	High	High	High	High	High	High	High	Phospho [S6(100); S8(100); S24(100); T48(100); S52(100); S126(100); S268(100)]	1	0.87392	0.675202	0.751541	0.86557	0.79161	1.0256	1.14293	1.40059	6	6	6	6	6	6	6	6	6	0.905	0	35.126	6
FALSE	High	Master Protein	A0A0P0WEK8	Os04g0609100 protein (Fragment) OS=Oryza sativa subsp. japonica GN=Os04g0609100 PE=4 SV=1	0	21.6099	11.1511	6	13	6	1	556	65.937	9.03	High	High	High	High	High	High	High	High	High	Phospho [S397(99.5); S410(100)]	1	1.10737	1.21021	1.0545	0.972133	1.12487	1.09947	1.27259	1.36923	1	1	1	1	1	1	1	1	1	0.304	0	36.8266	2
FALSE	High	Master Protein	Q8LI88	Os07g0167200 protein OS=Oryza sativa subsp. japonica GN=OJ1641_C04.126 PE=4 SV=1	0	21.554	7.31132	2	11	1	1	424	46.131	5.53	High	High	High	High	High	High	High	High	High	Phospho [S54(100); S610(100)]	1	1.0211	0.969888	1.08187	1.02441	1.00759	1.18849	1.2457	1.24135	2	2	2	2	2	2	2	2	2	0.233	0	21.9873	2
FALSE	High	Master Protein	Q10CW7	Os03g0748000 protein OS=Oryza sativa subsp. japonica GN=Os03g0748000 PE=4 SV=1	0	21.5512	6.20272	2	5	2	1	661	71.577	8.34	High	High	High	High	High	High	High	High	High	Phospho [S206(99)]	1	1.03835	0.994684	0.991956	0.955042	0.845361	1.33906	1.15638	1.40663	3	3	3	3	3	3	3	3	3	0.389	0	39.2262	2
FALSE	High	Master Protein	A0A0P0UYZ1	Os01g0174000 protein OS=Oryza sativa subsp. japonica GN=Os01g0174000 PE=4 SV=1	0	21.4672	6.05187	2	14	2	1	347	38.176	10.84	High	High	High	High	High	High	High	High	High	Phospho [S1126(100); S1306(98.4); S1545(100)]	1	1.03328	0.977518	1.06525	0.903772	1.01443	1.02087	1.13621	1.20396	4	4	4	4	4	4	4	4	4	0.136	0	36.9331	4
FALSE	High	Master Protein	Q5VMT5	Os06g0286351 protein OS=Oryza sativa subsp. japonica GN=Os06g0286351 PE=2 SV=1	0	21.4269	3.26714	4	17	4	1	1561	174.658	6.62	High	High	High	High	High	High	High	High	High	Phospho [S120(99.2)]	1	1.18959	0.909807	1.14832	0.902766	0.858066	1.18849	0.951802	1.01335	2	2	2	2	2	2	2	2	2	0.259	0	21.2825	1
FALSE	High	Master Protein	Q69UI3	Os08g0117100 protein OS=Oryza sativa subsp. japonica GN=Os08g0117100 PE=2 SV=1	0	21.3685	5.64263	1	6	1	1	319	35.92	6.48	High	High	High	High	High	High	High	High	High	Phospho [S712(100)]	1	0.97542	0.980379	1.05255	1.02441	0.95775	1.30307	1.28124	1.42352	2	2	2	2	2	2	2	2	2	0.129	0	13.1198	2
FALSE	High	Master Protein	A0A0P0V256	Os01g0337600 protein (Fragment) OS=Oryza sativa subsp. japonica GN=Os01g0337600 PE=4 SV=1	0	21.3436	2.31788	2	4	2	1	906	102.514	5.31	High	High	High	High	High	High	High	High	High	Phospho [S228(100); S313(100)]	1	1.03328	1.16062	1.04082	1.19531	1.05841	1.29076	1.19768	1.26066	2	2	2	2	2	2	2	2	2	0.225	0	14.7308	2
FALSE	High	Master Protein	Q75I97	Expressed protein OS=Oryza sativa subsp. japonica GN=OSJNBa0004L11.13 PE=2 SV=1	0	21.3145	7.02403	2	4	2	1	541	59.605	5.58	High	High	High	High	High	High	High	High	High	Phospho [S171(100); S173(100); S175(100); S249(100); S280(100); S282(100)]	1	0.95309	0.703813	0.930386	0.764034	0.903999	0.801162	0.915305	1.04472	6	6	6	6	6	6	6	6	6	2.384	0	87.0216	5
FALSE	High	Master Protein	Q6ZDR7	Os08g0486200 protein OS=Oryza sativa subsp. japonica GN=Os08g0486200 PE=2 SV=1	0	21.1847	10.7266	5	36	5	1	289	33.521	11.8	High	High	High	High	High	High	High	High	High	Phospho [S54(99.5)]	1	0.93482	1.07765	1.23139	1.17722	1.1796	1.2311	1.27547	1.21723	2	2	2	2	2	2	2	2	2	1.371	0	36.1902	2
FALSE	High	Master Protein	Q0DUS0	Os03g0169900 protein (Fragment) OS=Oryza sativa subsp. japonica GN=Os03g0169900 PE=4 SV=1	0	21.0106	15.5172	2	18	2	1	116	12.95	9.92	High	High	High	High	High	High	High	High	High	Phospho [S25(100); S321(100)]	1	1.13579	1.09005	1.12878	1.08975	1.1063	1.25572	1.16502	1.29323	4	4	4	4	4	4	4	4	4	0.668	0	30.9834	2
FALSE	High	Master Protein	A1A6F0	AT-hook motif nuclear localized protein 2 OS=Oryza sativa subsp. japonica GN=OsAHL2 PE=2 SV=1	0	20.8872	10.0279	2	11	2	1	359	35.469	10.14	High	High	High	High	High	High	High	High	High	Phospho [T81(100); T173(100)]	1	1.13884	1.17397	1.26364	1.30187	1.30469	1.54361	1.40033	1.75889	4	4	4	4	4	4	4	4	4	0.509	1	32.7731	3
FALSE	High	Master Protein	Q6ZFJ3	Ferredoxin--NADP reductase OS=Oryza sativa subsp. japonica GN=OJ1435_F07.32-2 PE=2 SV=1	0	20.8786	8.19672	3	13	2	1	366	40.638	7.84	High	High	High	High	High	High	High	High	High	Phospho [S57(100); S80(100)]	1	1.04444	1.00708	1.13562	1.00732	0.97241	1.10041	1.07282	1.1545	8	8	8	8	8	8	8	8	8	1.783	0	38.7048	7
FALSE	High	Master Protein	Q7XMK5	OSJNBb0039L24.13 protein OS=Oryza sativa subsp. japonica GN=Os04g0533300 PE=2 SV=1	0	20.7881	31.068	7	15	7	1	206	22.402	5.5	High	High	High	High	High	High	High	High	High	Phospho [S471(99.5); S550(99.2)]	1	1.07185	0.933649	0.999774	0.961074	0.952864	0.955523	0.995983	0.959064	2	2	2	2	2	2	2	2	2	0.216	0	56.6448	2
FALSE	High	Master Protein	A0A0P0X2K2	Os07g0137900 protein (Fragment) OS=Oryza sativa subsp. japonica GN=Os07g0137900 PE=4 SV=1	0	20.7076	3.69357	2	21	2	1	731	78.618	6.68	High	High	High	High	High	High	High	High	High	Phospho [S1018(100); S1032(100); S1064(98.7)]	1	1.03429	1.01948	0.978273	0.814299	0.852202	0.898703	0.917226	1.00008	5	5	5	5	5	5	5	5	5	0.359	0	40.3163	4
FALSE	High	Master Protein	Q10S92	EF hand family protein, expressed OS=Oryza sativa subsp. japonica GN=Os03g0130500 PE=4 SV=1	0	20.6636	5.14981	4	20	4	1	1068	113.56	5.88	High	High	High	High	High	High	High	High	High	Phospho [S234(100)]	1	1.05967	0.956537	1.05059	0.985202	0.938204	1.31349	1.22073	1.38371	3	3	3	3	3	3	3	3	3	0.269	0	27.0599	2
FALSE	High	Master Protein	A0A0P0XN73	Os09g0481300 protein OS=Oryza sativa subsp. japonica GN=Os09g0481300 PE=4 SV=1	0	20.6545	7.96964	2	8	2	1	527	56.83	4.94	High	High	High	High	High	High	High	High	High	Phospho [S378(100)]	1	1.05561	1.31417	1.09848	0.860544	0.975342	0.803056	0.786605	0.822744	2	2	2	2	2	2	2	2	2	0.241	0	41.5259	1
FALSE	High	Master Protein	Q84VG3	Leucine-rich repeat transmembrane protein kinase, putative, expressed OS=Oryza sativa subsp. japonica GN=Os10g0389800 PE=2 SV=1	0	20.6108	2.50348	1	10	1	1	719	78.648	6.89	High	High	High	High	High	High	High	High	High	Phospho [S319(99.5)]	1	1.01602	0.994684	1.00564	1.00229	0.965569	1.34947	1.13333	1.3451	2	2	2	2	2	2	2	2	2	0.52	0	40.806	1
FALSE	High	Master Protein	A0A0P0VBK7	Os01g0896800 protein (Fragment) OS=Oryza sativa subsp. japonica GN=Os01g0896800 PE=3 SV=1	0	20.6088	6.00601	1	20	1	1	333	37.697	9.09	High	High	High	High	High	High	High	High	High	Phospho [S481(100)]	1	1.05358	1.03474	1.20598	1.06864	1.06916	1.28792	1.22073	1.29202	3	3	3	3	3	3	3	3	3	0.222	0	37.4191	1
FALSE	High	Master Protein	Q6Z9J1	Os08g0439100 protein OS=Oryza sativa subsp. japonica GN=Os08g0439100 PE=2 SV=1	0	20.5833	2.35911	1	12	1	1	763	85.19	8	High	High	High	High	High	High	High	High	High	Phospho [S203(100)]	1	0.86174	0.75245	0.914749	1.00129	0.851225	1.19985	1.29276	1.4211	4	4	4	4	4	4	4	4	4	1.31	0	29.213	4
FALSE	High	Master Protein	Q10PC3	Os03g0239400 protein OS=Oryza sativa subsp. japonica GN=LOC_Os03g13614 PE=2 SV=1	0	20.5645	7.8329	4	8	4	1	383	41.033	9.32	High	High	High	High	High	High	High	High	High	Phospho [S22(100)]	1	1.07895	0.994684	0.995865	0.883666	0.913772	1.28981	1.24666	1.4018	2	2	2	2	2	2	2	2	2	1.31	0	50.3137	1
FALSE	High	Master Protein	A0A0P0VIH5	Os02g0437200 protein OS=Oryza sativa subsp. japonica GN=Os02g0437200 PE=4 SV=1	0	20.3806	9.39597	1	17	1	1	149	16.272	7.36	High	High	High	High	High	High	High	High	High	Phospho [S469(98.8)]	1	1.04647	0.915529	1.05157	0.99626	0.923545	1.06064	1.06417	1.26789	2	2	2	2	2	2	2	2	2	0.218	0	16.0578	1
FALSE	High	Master Protein	Q0JIZ1	Os01g0769900 protein OS=Oryza sativa subsp. japonica GN=Os01g0769900 PE=4 SV=1	0	20.349	4.90018	1	4	1	1	551	62.542	4.81	High	High	High	High	High	High	High	High	High	Phospho [S114(99.2); S143(99.6); S147(100)]	1	1.09418	1.00327	1.10434	0.986207	0.980228	1.07674	1.04401	1.10986	3	3	3	3	3	3	3	3	3	0.52	0	39.7902	3
FALSE	High	Master Protein	A0A0P0WY39	Os06g0558700 protein (Fragment) OS=Oryza sativa subsp. japonica GN=Os06g0558700 PE=4 SV=1	0	20.3486	9.42249	3	15	3	1	329	35.025	6.93	High	High	High	High	High	High	High	High	High	Phospho [S240(99.5); S279(99.6); S282(100)]	1	1.01399	0.995637	0.945045	0.857528	0.920613	1.09379	0.995022	1.09538	4	4	4	4	4	4	4	4	4	0.365	0	36.6037	4
FALSE	High	Master Protein	Q0DP16	Os03g0722100 protein (Fragment) OS=Oryza sativa subsp. japonica GN=Os03g0722100 PE=4 SV=1	0	20.3255	9.90654	4	18	4	1	535	57.639	4.91	High	High	High	High	High	High	High	High	High	Phospho [S324(93.3); S326(93.3); S542(100)]	1	1.07185	0.991823	1.09848	1.04049	0.990001	0.983933	0.949881	0.955445	5	5	5	5	5	5	5	5	5	0.487	0	40.7306	2
FALSE	High	Master Protein	Q6K5K7	Os02g0597800 protein OS=Oryza sativa subsp. japonica GN=Os02g0597800 PE=2 SV=1	0	20.1365	5.64103	2	19	2	1	585	64.864	8.28	High	High	High	High	High	High	High	High	High	Phospho [S199(100); S275(98.9)]	1	1.07794	0.955583	0.982183	0.932926	0.891294	1.10799	1.06033	1.2317	2	2	2	2	2	2	2	2	2	0.52	0	17.7862	2
FALSE	High	Master Protein	Q5ZDX7	Os01g0614700 protein OS=Oryza sativa subsp. japonica GN=P0410E01.39-1 PE=2 SV=1	0	20.1114	12.2581	2	6	2	1	310	34.199	5.01	High	High	High	High	High	High	High	High	High	Phospho [S226(100)]	1	1.07185	1.09196	1.1366	1.05457	1.10337	1.32864	1.21496	1.37405	3	3	3	3	3	3	3	3	3	1.031	0	61.4402	2
FALSE	High	Master Protein	Q7XTV6	OSJNBa0010D21.10 protein OS=Oryza sativa subsp. japonica GN=Os04g0648900 PE=2 SV=2	0	20.0948	7.72532	2	22	2	1	233	25.419	9.6	High	High	High	High	High	High	High	High	High	Phospho [S532(99.2); S535(100); S726(100); S730(99.5); S773(100)]	1	1.20989	1.10912	1.08675	0.985202	0.937227	1.17333	1.07762	1.22085	3	3	3	3	3	3	3	3	3	0.109	0	20.4282	3
FALSE	High	Master Protein	Q6Z9D2	Kinesin-like protein KIN-7H OS=Oryza sativa subsp. japonica GN=KIN7H PE=2 SV=2	0	20.0605	4.45795	3	7	3	1	987	111.804	5.4	High	High	High	High	High	High	High	High	High	Phospho [S373(100)]	1	1.0891	1.03283	1.06525	0.99626	1.03593	1.17901	1.14293	1.2317	2	2	2	2	2	2	2	2	2	0.334	0	47.8566	1
FALSE	High	Master Protein	Q69T30	Os02g0550700 protein OS=Oryza sativa subsp. japonica GN=Os02g0550700 PE=4 SV=1	0	20.0035	4.05063	1	12	1	1	395	43.192	6.14	High	High	High	High	High	High	High	High	High	Phospho [S53(100); S206(100)]	1	0.945985	1.07098	0.907908	0.890703	0.850248	0.837148	0.92491	0.959064	3	3	3	3	3	3	3	3	3	0.389	0	38.6734	3
FALSE	High	Master Protein	Q6Z3R6	Os08g0506700 protein OS=Oryza sativa subsp. japonica GN=Os08g0506700 PE=2 SV=1	0	19.9531	11.5288	3	15	3	1	399	41.606	8.1	High	High	High	High	High	High	High	High	High	Phospho [S196(100); S218(100)]	1	1.05662	0.945093	1.06232	0.885676	0.856111	1.12598	1.11508	1.25583	2	2	2	2	2	2	2	2	2	0.638	0	45.6195	2
FALSE	High	Master Protein	A0A0P0XT31	Os10g0167500 protein OS=Oryza sativa subsp. japonica GN=Os10g0167500 PE=4 SV=1	0	19.8796	8.28877	2	13	2	1	374	40.243	4.06	High	High	High	High	High	High	High	High	High	Phospho [S113(100); S184(100)]	1	1.11549	0.966074	0.966546	0.83139	0.778905	1.03791	0.922989	1.12796	2	2	2	2	2	2	2	2	2	0.54	0	34.4779	2
FALSE	High	Master Protein	Q9LWY5	Os06g0106100 protein OS=Oryza sativa subsp. japonica GN=Os06g0106100 PE=4 SV=1	0	19.8297	12.1739	2	9	2	1	230	26.926	5.71	High	High	High	High	High	High	High	High	High	Phospho [S16(99.1); S20(100); S50(99.4)]	1	1.15914	1.02616	1.05157	0.873613	0.862953	0.834307	0.786605	0.863761	2	2	2	2	2	2	2	2	2	0.425	0	77.4654	2
FALSE	High	Master Protein	Q5N7H0	Os01g0861700 protein OS=Oryza sativa subsp. japonica GN=Os01g0861700 PE=4 SV=1	0	19.8202	7.63547	2	38	2	1	406	44.349	8.31	High	High	High	High	High	High	High	High	High	Phospho [S805(99.6)]	1	1.07895	0.913621	1.05059	0.953032	1.0115	1.09568	1.13813	1.08694	2	2	2	2	2	2	2	2	2	0.086	0	43.2386	1
FALSE	High	Master Protein	A3BXL8	ABC transporter G family member 53 OS=Oryza sativa subsp. japonica GN=ABCG53 PE=2 SV=1	0	19.8199	0.968188	1	14	1	1	1446	162.66	7.02	High	High	High	High	High	High	High	High	High	Phospho [S23(100)]	1	1.02414	0.980379	0.926477	0.889697	0.825815	1.09568	1.04401	1.11469	2	2	2	2	2	2	2	2	2	0.638	0	42.4196	2
FALSE	High	Master Protein	Q7XJY1	OSJNBb0088C09.10 protein OS=Oryza sativa subsp. japonica GN=Os04g0423400 PE=4 SV=1	0	19.8055	13.5371	2	11	2	1	229	24.442	9.5	High	High	High	High	High	High	High	High	High	Phospho [S39(100)]	1	1.31037	0.89264	1.14832	0.969117	0.997819	1.3419	1.33118	1.43558	2	2	2	2	2	2	2	2	2	0.245	0	14.6283	2
FALSE	High	Master Protein	Q6K4V3	Zinc finger CCCH domain-containing protein 15 OS=Oryza sativa subsp. japonica GN=Os02g0301000 PE=2 SV=1	0	19.7307	7.36196	2	3	2	1	326	35.756	7.39	High	High	High	High	High	High	High	High	High	Phospho [S456(100)]	1	1.11042	0.973703	1.13366	1.02742	1.04864	1.2311	1.22169	1.24377	2	2	2	2	2	2	2	2	2	0.141	0	13.5013	2
FALSE	High	Master Protein	Q762B4	BRI1-KD interacting protein 103 OS=Oryza sativa subsp. japonica GN=bip103 PE=2 SV=1	0	19.6329	8.29346	2	6	2	1	627	70.134	9.01	High	High	High	High	High	High	High	High	High	Phospho [S70(100)]	1	1.11955	0.970842	1.01737	0.991234	0.88934	1.14303	0.96813	1.14364	2	2	2	2	2	2	2	2	2	0.218	0	35.1077	1
FALSE	High	Master Protein	Q7XSQ5	OSJNBa0084K11.9 protein OS=Oryza sativa subsp. japonica GN=Os04g0560600 PE=3 SV=2	0	19.5551	2.81426	1	8	1	1	533	59.524	6.68	High	High	High	High	High	High	High	High	High	Phospho [S114(100); T117(99.4); S136(100)]	1	1.19974	0.996591	1.0633	0.986207	0.939182	1.00477	0.995983	0.994048	2	2	2	2	2	2	2	2	2	0.292	0	46.4603	2
FALSE	High	Master Protein	Q84M80	Os03g0856400 protein OS=Oryza sativa subsp. japonica GN=LOC_Os03g63940 PE=2 SV=1	0	19.4716	6.49087	2	15	2	1	493	54.459	6.68	High	High	High	High	High	High	High	High	High	Phospho [S229(100); S231(100); S237(100)]	1	0.990645	1.16253	0.447602	0.500643	0.763268	1.32769	1.61067	1.14846	4	4	4	4	4	4	4	4	4	2.162	0	111.304	4
FALSE	High	Master Protein	Q8LH97	40S ribosomal protein S6 OS=Oryza sativa subsp. japonica GN=P0594D10.135 PE=2 SV=1	0	19.4648	6.8	4	39	4	1	250	28.455	10.65	High	High	High	High	High	High	High	High	High	Phospho [T52(100)]	1	1.01298	0.973703	1.05939	1.05959	1.0203	1.11557	1.19383	1.15208	5	5	5	5	5	5	5	5	5	2.981	0	44.8162	5
FALSE	High	Master Protein	Q6ZL81	Os07g0469100 protein OS=Oryza sativa subsp. japonica GN=Os07g0469100 PE=2 SV=1	0	19.4547	32.6667	5	23	4	1	150	15.72	9.33	High	High	High	High	High	High	High	High	High	Phospho [S48(100); S54(100); S439(100)]	1	1.05053	1.16635	1.09848	1.01938	1.02714	1.23962	1.22745	1.24377	2	2	2	2	2	2	2	2	2	0.245	0	19.8959	2
FALSE	High	Master Protein	Q6K5G2	Os02g0601800 protein OS=Oryza sativa subsp. japonica GN=OJ1791_B03.42-1 PE=4 SV=1	0	19.3217	7.0028	2	9	2	1	714	78.582	5.2	High	High	High	High	High	High	High	High	High	Phospho [S225(100)]	1	1.23729	0.990869	1.09164	1.08272	1.17471	1.21311	1.21208	1.27513	2	2	2	2	2	2	2	2	2	0.688	0	49.2394	2
FALSE	High	Master Protein	Q2QT65	Zinc finger CCCH domain-containing protein 66 OS=Oryza sativa subsp. japonica GN=Os12g0405100 PE=2 SV=1	0	19.2896	5.72687	2	24	1	1	454	48.632	8.18	High	High	High	High	High	High	High	High	High	Phospho [S135(99)]	1	0.99572	0.934602	0.934295	0.906788	0.875657	1.05969	1.01423	1.10986	2	2	2	2	2	2	2	2	2	0.35	0	47.6494	1
FALSE	High	Master Protein	A0A0P0VRU9	Os02g0830900 protein (Fragment) OS=Oryza sativa subsp. japonica GN=Os02g0830900 PE=4 SV=1	0	19.0722	4.52128	1	25	1	1	376	40.912	6.54	High	High	High	High	High	High	High	High	High	Phospho [S8(100); S18(100); S46(100); S50(100); S51(100)]	1	0.829259	1.09291	0.759359	0.753981	0.917681	1.03886	1.15158	1.38732	5	5	5	5	5	5	5	5	5	1.254	0	66.1384	4
FALSE	High	Master Protein	Q688U6	Os05g0579000 protein OS=Oryza sativa subsp. japonica GN=Os05g0579000 PE=3 SV=1	0	18.9395	8.18363	4	27	4	1	501	53.285	9.01	High	High	High	High	High	High	High	High	High	Phospho [S169(100)]	1	1.1632	0.958444	1.15712	1.05155	1.02225	1.63263	1.5444	1.57793	3	3	3	3	3	3	3	3	3	1.054	0	52.3224	2
FALSE	High	Master Protein	A0A0P0XUJ0	Os10g0392700 protein (Fragment) OS=Oryza sativa subsp. japonica GN=Os10g0392700 PE=3 SV=1	0	18.9124	4.46429	2	23	2	1	336	35.571	7.59	High	High	High	High	High	High	High	High	High	Phospho [S112(100); S173(100)]	1	1.04546	0.969888	1.00955	0.863559	0.985115	1.1061	1.10067	1.14726	2	2	2	2	2	2	2	2	2	0.259	0	18.3434	2
FALSE	High	Master Protein	Q657Z6	Os01g0104800 protein OS=Oryza sativa subsp. japonica GN=Os01g0104800 PE=2 SV=1	0	18.8993	5.73643	2	5	2	1	645	73.244	5.49	High	High	High	High	High	High	High	High	High	Phospho [S485(100)]	1	0.917565	0.844957	0.927454	0.824352	0.897158	1.19038	1.22265	1.41145	2	2	2	2	2	2	2	2	2	0.225	0	18.6875	2
FALSE	High	Master Protein	Q658H5	SPX domain-containing membrane protein Os06g0129400 OS=Oryza sativa subsp. japonica GN=Os06g0129400 PE=2 SV=1	0	18.8351	4.44126	2	6	2	1	698	77.6	8.22	High	High	High	High	High	High	High	High	High	Phospho [S254(100)]	1	0.978465	0.912668	0.890317	0.819326	0.854157	1.00193	0.961407	1.01456	1	1	1	1	1	1	1	1	1	0.334	0	41.6942	1
FALSE	High	Master Protein	Q339K7	Os10g0346200 protein OS=Oryza sativa subsp. japonica GN=Os10g0346200 PE=2 SV=2	0	18.8322	4.44444	1	10	1	1	360	39.893	7.9	High	High	High	High	High	High	High	High	High	Phospho [S56(100)]	1	1.10737	0.986101	0.962637	0.951021	0.892271	1.06348	1.09491	1.07005	2	2	2	2	2	2	2	2	2	1.154	0	23.517	1
FALSE	High	Master Protein	Q2RBP5	Os11g0103900 protein OS=Oryza sativa subsp. japonica GN=Os11g0104050 PE=2 SV=1	0	18.7805	18.6916	1	11	1	1	107	10.683	11.93	High	High	High	High	High	High	High	High	High	Phospho [S319(100); T504(99.4); S584(99.6)]	1	1.0079	1.2331	1.56758	1.48886	1.55976	1.23584	1.21208	1.20516	3	3	3	3	3	3	3	3	3	0.283	0	54.1261	3
FALSE	High	Master Protein	Q0D4F7	Os07g0628700 protein OS=Oryza sativa subsp. japonica GN=Os07g0628700 PE=3 SV=1	0	18.764	4.72674	3	28	3	1	677	73.626	6.95	High	High	High	High	High	High	High	High	High	Phospho [S1118(100); S1127(100); S1130(100)]	1	1.05459	1.03951	0.918658	0.898745	0.927454	1.09284	1.10547	1.07849	2	2	2	2	2	2	2	2	2	0.101	0	56.5491	2
FALSE	High	Master Protein	Q0J9W2	Os04g0628600 protein OS=Oryza sativa subsp. japonica GN=Os04g0628600 PE=4 SV=1	0	18.7196	2.06782	2	16	2	1	1209	132.762	5.43	High	High	High	High	High	High	High	High	High	Phospho [S147(99); S150(100); S219(100)]	1	0.841439	0.898363	0.847316	0.803241	0.869794	0.910067	1.04304	1.17138	2	2	2	2	2	2	2	2	2	0.274	0	19.9234	2
FALSE	High	Master Protein	Q8LJG7	6b-interacting protein 1-like OS=Oryza sativa subsp. japonica GN=Os01g0674000 PE=2 SV=1	0	18.7033	11.1446	2	4	2	1	332	35.897	9.61	High	High	High	High	High	High	High	High	High	Phospho [S350(100); S429(99); S435(99.5)]	1	1.06576	0.954629	0.938204	0.857528	0.831679	0.912908	0.878808	0.96027	3	3	3	3	3	3	3	3	3	0.136	0	24.2671	3
FALSE	High	Master Protein	Q6AVJ1	Expressed protein OS=Oryza sativa subsp. japonica GN=OSJNBa0022C08.16 PE=3 SV=1	0	18.5811	3.16092	3	10	3	1	1044	118.676	6.65	High	High	High	High	High	High	High	High	High	Phospho [S830(100)]	1	1.2312	0.88215	0.782814	0.679588	0.705608	0.73866	0.706888	0.780521	2	2	2	2	2	2	2	2	2	0.112	0	53.5507	2
FALSE	High	Master Protein	Q0DXR0	Os02g0738900 protein OS=Oryza sativa subsp. japonica GN=Os02g0738900 PE=3 SV=1	0	18.5092	2.8169	2	20	2	1	923	100.331	9.16	High	High	High	High	High	High	High	High	High	Phospho [S231(100)]	1	1.11549	1.01376	1.06916	0.999276	0.987069	1.26046	1.17655	1.33907	4	4	4	4	4	4	4	4	4	0.346	0	31.4872	3
FALSE	High	Master Protein	Q5KQP1	Associated with HOX family protein, expressed OS=Oryza sativa subsp. japonica GN=Os03g0680800 PE=2 SV=1	0	18.4996	9.03704	3	24	3	1	675	74.442	6.49	High	High	High	High	High	High	High	High	High	Phospho [S100(100); S126(100)]	1	1.07083	1.07765	1.21771	1.12594	1.10337	1.15629	1.12084	1.1364	2	2	2	2	2	2	2	2	2	0.778	0	33.7956	2
FALSE	High	Master Protein	Q5N7K6	Os01g0688600 protein OS=Oryza sativa subsp. japonica GN=Os01g0688600 PE=2 SV=1	0	18.4351	16.4251	2	9	2	1	207	22.348	10.11	High	High	High	High	High	High	High	High	High	Phospho [S513(100)]	1	1.20583	1.08242	1.22748	1.10584	1.05841	1.22258	1.21016	1.35234	2	2	2	2	2	2	2	2	2	0.225	0	38.8471	1
FALSE	High	Master Protein	Q7EZD3	NAC2 protein OS=Oryza sativa subsp. japonica GN=P0498E12.103 PE=2 SV=1	0	18.425	2.46914	1	11	1	1	729	80.477	4.78	High	High	High	High	High	High	High	High	High	Phospho [T145(100); S166(100)]	1	0.99166	0.85354	0.956773	1.16415	0.930386	1.14492	1.25338	1.44764	3	3	3	3	3	3	3	3	3	0.225	0	12.9185	2
FALSE	High	Master Protein	Q7XXN2	Os09g0544300 protein OS=Oryza sativa subsp. japonica GN=Os09g0544300 PE=2 SV=1	0	18.4211	8.62355	2	3	2	1	603	66.288	6.18	High	High	High	High	High	High	High	High	High	Phospho [S24(100); S254(100)]	1	1.18959	1.18542	1.23237	0.966101	0.961659	0.649642	0.607002	0.794997	3	3	3	3	3	3	3	3	3	0.136	0	37.6547	3
FALSE	High	Master Protein	Q5KS50	Coleoptile phototropism protein 1 OS=Oryza sativa subsp. japonica GN=CPT1 PE=2 SV=1	0	18.3261	4.06824	3	13	3	1	762	80.554	7.66	High	High	High	High	High	High	High	High	High	Phospho [S95(100)]	1	1.37635	1.17111	1.42294	1.24759	1.14735	1.71596	1.26491	1.75165	2	2	2	2	2	2	2	2	2	0.318	0	14.8606	1
FALSE	High	Master Protein	Q6ZAR0	Homeobox-leucine zipper protein ROC1 OS=Oryza sativa subsp. japonica GN=ROC1 PE=2 SV=1	0	18.3158	3.18878	1	4	1	1	784	84.562	5.8	High	High	High	High	High	High	High	High	High	Phospho [S37(100); S543(100)]	1	0.98963	0.823976	1.10337	1.1169	0.798451	1.79456	1.60491	1.6286	1	1	1	1	1	1	1	1	1	0.301	0	29.8177	2
FALSE	High	Master Protein	Q9FXQ3	OSJNBa0013K16.2 protein OS=Oryza sativa subsp. japonica GN=oscdpk7 PE=2 SV=1	0	18.2368	4.35572	2	9	1	1	551	60.928	5.74	High	High	High	High	High	High	High	High	High	Phospho [S66(100)]	1	1.03125	0.943185	1.076	0.887687	0.855134	1.44039	1.22265	1.61412	2	2	2	2	2	2	2	2	2	0.172	0	33.1354	1
FALSE	High	Master Protein	Q5I396	O-acyltransferase OS=Oryza sativa subsp. japonica GN=DAGAT PE=2 SV=1	0	18.2354	4.83271	1	7	1	1	538	59.565	8.92	High	High	High	High	High	High	High	High	High	Phospho [S30(100)]	1	1.39157	0.92888	1.20403	0.823347	1.02421	1.74059	1.3696	1.75647	3	3	3	3	3	3	3	3	3	0.205	0	18.9757	1
FALSE	High	Master Protein	Q6ESS0	Os02g0668400 protein OS=Oryza sativa subsp. japonica GN=Os02g0668400 PE=4 SV=1	0	18.2082	4.30293	1	5	1	1	581	63.733	5.41	High	High	High	High	High	High	High	High	High	Phospho [S137(100)]	1	1.1226	1.05381	1.119	0.994249	0.906931	1.49342	1.30621	1.62015	2	2	2	2	2	2	2	2	2	0.425	0	24.0183	1
FALSE	High	Master Protein	A0A0N7KQA7	Os08g0559700 protein OS=Oryza sativa subsp. japonica GN=Os08g0559700 PE=4 SV=1	0	18.1168	11.7647	1	6	1	1	170	18.656	9.54	High	High	High	High	High	High	High	High	High	Phospho [S239(100)]	1	1.03531	1.03855	1.05939	0.958058	1.00173	1.24152	1.1631	1.25704	1	1	1	1	1	1	1	1	1	0.359	0	28.8693	1
FALSE	High	Master Protein	Q69JW2	NAP1-related protein 2 OS=Oryza sativa subsp. japonica GN=Os02g0576700 PE=2 SV=1	0	18.0344	12.3016	1	8	1	1	252	28.571	4.32	High	High	High	High	High	High	High	High	High	Phospho [S33(99.4); S38(100)]	1	1.03429	0.868799	1.05743	1.00832	1.05255	1.25951	1.30044	1.33304	3	3	3	3	3	3	3	3	3	0.241	0	18.3541	3
FALSE	High	Master Protein	Q5Z7P1	Os06g0727400 protein OS=Oryza sativa subsp. japonica GN=Os06g0727400 PE=2 SV=1	0	18.0003	6.76329	3	9	3	1	414	45.39	9.41	High	High	High	High	High	High	High	High	High	Phospho [S21(100); S175(100)]	1	1.13376	1.05763	1.13464	1.09176	1.12194	1.28697	1.32061	1.3632	3	3	3	3	3	3	3	3	3	0.269	0	21.7775	2
FALSE	High	Master Protein	Q6Z4S6	Os07g0122400 protein OS=Oryza sativa subsp. japonica GN=Os07g0122400 PE=4 SV=1	0	17.9699	12.7932	2	6	2	1	469	49.927	4.49	High	High	High	High	High	High	High	High	High	Phospho [T48(100); T50(100); S417(100)]	1	1.03531	0.939371	0.882498	0.923878	0.872725	1.23584	1.10739	1.31494	3	3	3	3	3	3	3	3	3	0.259	0	23.6715	2
FALSE	High	Master Protein	Q10RH2	Os03g0159200 protein OS=Oryza sativa subsp. japonica GN=Os03g0159200 PE=2 SV=1	0	17.7704	8.99358	2	7	2	1	467	51.251	9.57	High	High	High	High	High	High	High	High	High	Phospho [T527(100); S528(99.3)]	1	1.05155	0.899316	1.05548	1.10182	0.991956	1.23678	1.10643	1.33786	2	2	2	2	2	2	2	2	2	0.16	0	50.5698	1
FALSE	High	Master Protein	Q6AVA8	Pyruvate, phosphate dikinase 1, chloroplastic OS=Oryza sativa subsp. japonica GN=PPDK1 PE=1 SV=1	0	17.7649	1.26716	1	18	1	1	947	102.722	6.37	High	High	High	High	High	High	High	High	High	Phospho [S314(100)]	1	1.02414	0.91076	0.966546	0.918851	0.884453	1.14871	1.13813	1.2317	2	2	2	2	2	2	2	2	2	0.668	0	29.1665	1
FALSE	High	Master Protein	Q6K688	Os02g0792900 protein OS=Oryza sativa subsp. japonica GN=Os02g0792900 PE=2 SV=1	0	17.743	3.62319	1	9	1	1	414	45.766	7.21	High	High	High	High	High	High	High	High	High	Phospho [S299(100); S301(100)]	1	0.98557	0.994684	1.00857	1.08975	1.02323	1.40914	1.39841	1.43196	2	2	2	2	2	2	2	2	2	0.54	0	64.2339	2
FALSE	High	Master Protein	Q6EUN0	ASC1-like protein 1 OS=Oryza sativa subsp. japonica GN=Os02g0581300 PE=2 SV=1	0	17.5064	5.82524	2	17	2	1	309	36.398	8.41	High	High	High	High	High	High	High	High	High	Phospho [S109(99.6)]	1	1.31037	0.879289	1.68095	1.68691	1.09457	1.69986	1.51943	1.59723	1	1	1	1	1	1	1	1	1	0.778	0	28.1875	1
FALSE	High	Master Protein	A0A0P0W4U5	Os03g0822800 protein (Fragment) OS=Oryza sativa subsp. japonica GN=Os03g0822800 PE=4 SV=1	0	17.482	13.2911	1	11	1	1	158	17.747	4.49	High	High	High	High	High	High	High	High	High	Phospho [S19(100); S21(100); S49(100)]	1	1.31849	1.10436	1.07991	0.972133	1.02714	1.3097	1.25626	1.48625	2	2	2	2	2	2	2	2	2	0.311	0	20.8707	2
FALSE	High	Master Protein	A0A0P0VQF4	Os02g0768700 protein OS=Oryza sativa subsp. japonica GN=Os02g0768700 PE=4 SV=1	0	17.4757	13.2653	2	4	2	1	294	31.137	9.94	High	High	High	High	High	High	High	High	High	Phospho [S1071(99.3); S1189(100)]	1	1.08606	1.02043	1.00955	0.963085	0.976319	1.1667	1.04497	1.18707	3	3	3	3	3	3	3	3	3	0.083	0	21.0271	2
FALSE	High	Master Protein	Q7X7E9	Putative DNA ligase 4 OS=Oryza sativa subsp. japonica GN=LIG4 PE=2 SV=2	0	17.4637	2.34493	2	7	2	1	1322	148.984	7.17	High	High	High	High	High	High	High	High	High	Phospho [T110(100)]	1	1.03023	0.999452	1.07014	1.08473	1.02714	1.34	1.1631	1.21964	2	2	2	2	2	2	2	2	2	0.701	0	17.6619	2
FALSE	High	Master Protein	Q7F8S5	Peroxiredoxin-2E-2, chloroplastic OS=Oryza sativa subsp. japonica GN=PRXIIE-2 PE=1 SV=1	0	17.4416	12.4444	2	5	2	1	225	23.165	6.58	High	High	High	High	High	High	High	High	High	Phospho [S74(100)]	1	1.34184	1.19877	1.34378	1.21039	1.21087	1.49531	1.29468	1.43799	4	4	4	4	4	4	4	4	4	0.322	0	25.6839	1
FALSE	High	Master Protein	Q2QX21	Os12g0172500 protein OS=Oryza sativa subsp. japonica GN=LOC_Os12g07450 PE=4 SV=2	0	17.4157	3.5524	1	12	1	1	563	59.751	7.55	High	High	High	High	High	High	High	High	High	Phospho [S107(100); T110(100)]	1	0.97542	1.08719	1.34085	1.18727	1.27733	1.29644	1.24186	1.20516	3	3	3	3	3	3	3	3	3	0.585	0	53.3364	3
FALSE	High	Master Protein	Q688U3	Zinc-finger homeodomain protein 6 OS=Oryza sativa subsp. japonica GN=ZHD6 PE=2 SV=1	0	17.3924	9.80392	3	14	3	1	255	27.941	8.7	High	High	High	High	High	High	High	High	High	Phospho [S124(100); S128(99.6)]	1	1.2312	1.00994	1.21185	0.980175	0.832656	0.902491	0.833667	0.839633	2	2	2	2	2	2	2	2	2	3.642	0	38.3235	1
FALSE	High	Master Protein	Q53JF7	ABA/WDS induced protein, expressed OS=Oryza sativa subsp. japonica GN=LOC_Os11g06720 PE=2 SV=1	0	17.2531	6.52174	1	16	1	1	138	15.456	6.7	High	High	High	High	High	High	High	High	High	Phospho [S805(100); S809(100)]	1	1.05155	1.12057	0.868816	0.786151	0.77695	1.05212	0.938356	0.940968	2	2	2	2	2	2	2	2	2	0.198	0	179.492	2
FALSE	High	Master Protein	A0A0P0X1C3	Os06g0728600 protein OS=Oryza sativa subsp. japonica GN=Os06g0728600 PE=4 SV=1	0	17.2415	1.45414	2	48	2	1	894	96.627	6.16	High	High	High	High	High	High	High	High	High	Phospho [S582(100)]	1	1.09316	1.12248	1.11607	1.08573	1.1063	1.30023	1.27067	1.4211	2	2	2	2	2	2	2	2	2	0.17	0	26.1516	1
FALSE	High	Master Protein	Q0D3X9	Os07g0660200 protein (Fragment) OS=Oryza sativa subsp. japonica GN=Os07g0660200 PE=4 SV=1	0	17.2102	2.06022	1	8	1	1	631	71.653	7.77	High	High	High	High	High	High	High	High	High	Phospho [S149(100)]	1	1.03937	1.09005	1.07796	1.14304	1.12487	1.2794	1.25146	1.4199	2	2	2	2	2	2	2	2	2	0.778	0	18.527	2
FALSE	High	Master Protein	Q5TKF1	Os05g0596200 protein OS=Oryza sativa subsp. japonica GN=Os05g0596200 PE=2 SV=1	0	17.208	8.53659	2	8	2	1	164	18.177	9.96	High	High	High	High	High	High	High	High	High	Phospho [T237(100)]	1	1.13275	0.951768	1.05255	0.958058	1.06721	0.997191	0.954684	0.934936	1	1	1	1	1	1	1	1	1	0.413	0	11.517	2
FALSE	High	Master Protein	Q6ZKC0	14-3-3-like protein GF14-C OS=Oryza sativa subsp. japonica GN=GF14C PE=1 SV=1	0	17.2048	9.76562	2	3	1	1	256	28.808	4.84	High	High	High	High	High	High	High	High	High	Phospho [S618(100); S649(100)]	1	1.14087	0.952722	1.03789	0.911814	0.88934	1.08053	1.05649	1.02421	3	3	3	3	3	3	3	3	3	0.253	0	50.3173	2
FALSE	High	Master Protein	Q2QM47	Serine/threonine-protein phosphatase BSL2 homolog OS=Oryza sativa subsp. japonica GN=BSL2 PE=2 SV=2	0	17.2019	2.08127	2	18	2	1	1009	106.359	5.86	High	High	High	High	High	High	High	High	High	Phospho [S96(100); S254(100); S377(100); S382(100)]	1	1.08809	1.13869	0.949932	0.804246	0.835588	0.947	0.951802	0.919254	4	4	4	4	4	4	4	4	4	0.638	0	57.5562	4
FALSE	High	Master Protein	A0A0P0VEA4	Os02g0131100 protein (Fragment) OS=Oryza sativa subsp. japonica GN=Os02g0131100 PE=4 SV=1	0	17.1867	8.21355	4	24	4	1	487	54.388	4.49	High	High	High	High	High	High	High	High	High	Phospho [S349(100); S616(100)]	1	0.95715	1.00994	1.0203	0.958058	0.920613	1.2955	1.14293	1.08091	4	4	4	4	4	4	4	4	4	0.668	0	14.4714	3
FALSE	High	Master Protein	A0A0P0XDH3	Os08g0224200 protein (Fragment) OS=Oryza sativa subsp. japonica GN=Os08g0224200 PE=4 SV=1	0	17.1235	4.68498	3	11	3	1	619	68.376	6.65	High	High	High	High	High	High	High	High	High	Phospho [S143(100); S147(100); S416(100)]	1	1.11143	0.950815	0.997819	0.895729	0.865884	1.07011	1.04977	1.19672	3	3	3	3	3	3	3	3	3	0.374	0	50.983	2
FALSE	High	Master Protein	Q6Z0H6	Os08g0328300 protein OS=Oryza sativa subsp. japonica GN=Os08g0328300 PE=2 SV=1	0	17.0449	4.58515	2	16	2	1	458	50.267	7.66	High	High	High	High	High	High	High	High	High	Phospho [S11(100); S45(100); S290(99.2); T295(100)]	1	1.11549	0.964166	1.12096	0.989223	1.00173	1.31254	1.33118	1.38974	3	3	3	3	3	3	3	3	3	0.433	0	35.7413	3
FALSE	High	Master Protein	Q10BA4	Os03g0825800 protein OS=Oryza sativa subsp. japonica GN=LOC_Os03g61060 PE=2 SV=1	0	17.0052	8.57788	3	22	3	1	443	49.255	8.72	High	High	High	High	High	High	High	High	High	Phospho [S250(100)]	1	0.91452	0.914575	0.870771	0.722816	0.688994	0.768964	0.690561	0.849284	3	3	3	3	3	3	3	3	3	0.334	0	13.7184	3
FALSE	High	Master Protein	Q10QG5	Mannitol transporter, putative, expressed OS=Oryza sativa subsp. japonica GN=Os03g0197100 PE=2 SV=1	0	16.9946	6.5764	3	7	3	1	517	55.584	8.66	High	High	High	High	High	High	High	High	High	Phospho [S35(100); S374(99.1)]	1	1.02211	0.878335	0.940159	0.830384	0.844384	0.891127	0.876887	0.92046	4	4	4	4	4	4	4	4	4	0.492	0	42.2756	2
FALSE	High	Master Protein	Q6YUH7	Os02g0697300 protein OS=Oryza sativa subsp. japonica GN=tom1 PE=2 SV=1	0	16.9873	5.35714	2	19	2	1	392	43.58	4.77	High	High	High	High	High	High	High	High	High	Phospho [S243(100)]	1	1.0414	0.774385	1.01248	1.28378	0.968501	1.82582	1.81428	1.89038	2	2	2	2	2	2	2	2	2	0.222	0	13.2849	1
FALSE	High	Master Protein	A0A0P0XQG2	Os09g0530500 protein (Fragment) OS=Oryza sativa subsp. japonica GN=Os09g0530500 PE=4 SV=1	0	16.9711	5.39326	1	5	1	1	445	49.892	5.76	High	High	High	High	High	High	High	High	High	Phospho [S96(99.5); S118(100)]	1	1.01907	0.872613	0.965569	0.818321	0.809201	0.712144	0.849995	0.703313	2	2	2	2	2	2	2	2	2	1.371	0	16.6898	2
FALSE	High	Master Protein	A0A0P0VNU0	Os02g0709900 protein (Fragment) OS=Oryza sativa subsp. japonica GN=Os02g0709900 PE=4 SV=1	0	16.9283	19.1176	2	6	2	1	136	14.912	9.69	High	High	High	High	High	High	High	High	High	Phospho [S392(99.3)]	1	1.0079	0.966074	1.0545	1.04049	1.03984	1.22921	1.19672	1.34872	1	1	1	1	1	1	1	1	1	0.202	0	93.3371	1
FALSE	High	Master Protein	Q5Z9Q8	Os06g0714500 protein OS=Oryza sativa subsp. japonica GN=Os06g0714500 PE=2 SV=1	0	16.9027	3.81679	1	36	1	1	393	43.668	7.8	High	High	High	High	High	High	High	High	High	Phospho [S9(100); S636(99.4)]	1	1.11143	1.02329	1.13171	1.14304	1.13855	1.16481	1.25434	1.43558	2	2	2	2	2	2	2	2	2	0.269	0	14.746	2
FALSE	High	Master Protein	Q68UR2	Os09g0240500 protein OS=Oryza sativa subsp. japonica GN=OJ1178_D01.11-1 PE=2 SV=1	0	16.8909	4.209	2	6	2	1	689	74.672	8.87	High	High	High	High	High	High	High	High	High	Phospho [S773(100)]	1	1.09722	1.0891	1.29883	1.34309	1.27635	1.483	1.57705	1.66238	1	1	1	1	1	1	1	1	1	0.108	0	20.854	1
FALSE	High	Master Protein	Q2QM48	Os12g0617800 protein OS=Oryza sativa subsp. japonica GN=LOC_Os12g42300 PE=2 SV=2	0	16.8646	2.2756	1	8	1	1	791	85.289	5.63	High	High	High	High	High	High	High	High	High	Phospho [S29(100); S137(100)]	1	0.770389	0.516892	0.523831	0.542866	0.567809	0.391111	0.509037	0.62128	2	2	2	2	2	2	2	2	2	0.318	0	21.2746	2
FALSE	High	Master Protein	Q7XVC0	OSJNBa0072D21.10 protein OS=Oryza sativa subsp. japonica GN=Os04g0382300 PE=2 SV=2	0	16.8617	5.64706	2	7	2	1	425	46.826	5.24	High	High	High	High	High	High	High	High	High	Phospho [S61(99.1)]	1	1.09215	1.07002	1.08089	0.945995	0.927454	1.0739	1.03728	1.01938	1	1	1	1	1	1	1	1	1	0.311	0	18.2542	1
FALSE	High	Master Protein	Q6Z2M4	Golgi SNAP receptor complex member 1 OS=Oryza sativa subsp. japonica GN=Os02g0126800 PE=2 SV=1	0	16.8544	6.47773	1	10	1	1	247	26.964	9.23	High	High	High	High	High	High	High	High	High	Phospho [S227(100)]	1	0.96324	0.922204	1.02616	1.16616	1.18546	2.57868	2.00733	3.06056	1	1	1	1	1	1	1	1	1	0.54	0	18.9551	2
FALSE	High	Master Protein	A0A0P0W604	Os04g0107900 protein (Fragment) OS=Oryza sativa subsp. japonica GN=Os04g0107900 PE=4 SV=1	0	16.7561	9.63855	2	6	1	1	249	27.94	4.69	High	High	High	High	High	High	High	High	High	Phospho [S70(99.4)]	1	1.11549	1.03855	1.09848	0.959064	0.875657	0.952682	0.952763	0.956651	3	3	3	3	3	3	3	3	3	0.874	0	18.3971	3
FALSE	High	Master Protein	P93407	Superoxide dismutase [Cu-Zn], chloroplastic OS=Oryza sativa subsp. japonica GN=SODCP PE=1 SV=1	0	16.7146	19.4313	3	7	3	1	211	21.288	6.25	High	High	High	High	High	High	High	High	High	Phospho [S675(100)]	1	1.16827	0.914575	1.05743	0.956048	0.927454	1.07106	1.01231	1.10262	2	2	2	2	2	2	2	2	2	0.184	0	33.0288	2
FALSE	High	Master Protein	Q10PS3	HEAT repeat family protein, expressed OS=Oryza sativa subsp. japonica GN=LOC_Os03g12300 PE=2 SV=1	0	16.7146	4.5007	2	23	2	1	711	79.964	5.97	High	High	High	High	High	High	High	High	High	Phospho [S93(100)]	1	1.22207	0.72384	1.06134	1.14203	0.903022	0.950788	0.96813	1.02783	2	2	2	2	2	2	2	2	2	0.15	0	18.2451	2
FALSE	High	Master Protein	Q6ASR0	Os05g0147500 protein OS=Oryza sativa subsp. japonica GN=Os05g0147500 PE=4 SV=1	0	16.637	5.36913	2	7	2	1	596	65.087	6.09	High	High	High	High	High	High	High	High	High	Phospho [S94(100); T128(100); S130(100); S295(99.4); T297(100)]	1	1.19872	0.991823	1.07112	0.985202	0.980228	0.872187	0.890334	0.868586	3	3	3	3	3	3	3	3	3	0.778	0	18.7589	3
FALSE	High	Master Protein	Q10P22	Os03g0249900 protein OS=Oryza sativa subsp. japonica GN=Os03g0249900 PE=2 SV=1	0	16.5436	14.1509	3	6	3	1	318	35.145	8.73	High	High	High	High	High	High	High	High	High	Phospho [S65(100); S547(100)]	1	1.07692	0.823976	0.963614	0.822342	0.92159	0.847565	0.921068	0.85411	5	5	5	5	5	5	5	5	5	0.433	3	37.1401	2
FALSE	High	Master Protein	Q0DYK7	Os02g0685900 protein OS=Oryza sativa subsp. japonica GN=Os02g0685900 PE=3 SV=1	0	16.3985	4.18944	2	12	1	1	549	60.349	5.83	High	High	High	High	High	High	High	High	High	Phospho [S188(100)]	1	1.05155	0.884057	1.04668	0.950016	0.908885	1.34	1.26971	1.44885	2	2	2	2	2	2	2	2	2	0.359	0	11.4859	2
FALSE	High	Master Protein	Q60DW3	PHD finger protein ALFIN-LIKE 5 OS=Oryza sativa subsp. japonica GN=Os05g0419100 PE=2 SV=1	0	16.3979	10.0775	2	3	2	1	258	29.086	5.6	High	High	High	High	High	High	High	High	High	Phospho [T137(99.1)]	1	1.1297	0.896455	1.13171	1.04451	0.958728	1.10041	1.09587	1.10624	1	1	1	1	1	1	1	1	1	0.218	0	34.4074	1
FALSE	High	Master Protein	B9FJG3	Zinc finger BED domain-containing protein RICESLEEPER 1 OS=Oryza sativa subsp. japonica GN=Os05g0239150 PE=3 SV=1	0	16.3877	3.04709	1	11	1	1	722	80.786	5.27	High	High	High	High	High	High	High	High	High	Phospho [S389(100); S393(100)]	1	1.01196	1.04904	1.03007	0.878639	0.917681	1.29834	1.16502	1.27634	3	3	3	3	3	3	3	3	3	0.557	0	42.1229	3
FALSE	High	Master Protein	Q0IXI6	Os10g0431000 protein (Fragment) OS=Oryza sativa subsp. japonica GN=Os10g0431000 PE=4 SV=2	0	16.291	9.72516	3	18	3	1	473	51.603	5.29	High	High	High	High	High	High	High	High	High	Phospho [S447(100)]	1	1.08098	0.972749	1.02323	0.904777	1.033	1.33148	1.11412	1.50072	2	2	2	2	2	2	2	2	2	0.205	0	23.6233	1
FALSE	High	Master Protein	Q0DFV9	Putative rRNA methyltransferase OS=Oryza sativa subsp. japonica GN=Os05g0567400 PE=3 SV=1	0	16.1218	1.8315	1	11	1	1	819	92.285	8.07	High	High	High	High	High	High	High	High	High	Phospho [S671(100); S677(99.5)]	1	0.9673	0.921251	0.932341	1.0043	1.00759	1.34095	1.33022	1.3439	2	2	2	2	2	2	2	2	2	0.119	0	18.3172	2
FALSE	High	Master Protein	A0A0P0VQR0	Os02g0786200 protein (Fragment) OS=Oryza sativa subsp. japonica GN=Os02g0786200 PE=4 SV=1	0	16.0836	5.35714	2	9	2	1	784	86.62	5.87	High	High	High	High	High	High	High	High	High	Phospho [S506(100)]	1	1.0617	0.933649	0.877612	0.691652	0.689971	0.951735	0.871125	1.01094	2	2	2	2	2	2	2	2	2	0.212	0	34.1367	1
FALSE	High	Master Protein	Q2QP63	Kelch motif family protein, expressed OS=Oryza sativa subsp. japonica GN=Os12g0540800 PE=2 SV=2	0	16.0288	3.41556	1	12	1	1	527	57.704	5.27	High	High	High	High	High	High	High	High	High	Phospho [T349(100)]	1	1.25962	1.01948	1.17178	1.03547	0.990001	1.0578	1.06321	1.09176	3	3	3	3	3	3	3	3	3	0.369	1	13.0382	3
FALSE	High	Master Protein	P28752	Tubulin alpha-1 chain OS=Oryza sativa subsp. japonica GN=TUBA1 PE=1 SV=1	0	15.8952	9.11111	3	4	2	1	450	49.622	5.06	High	High	High	High	High	High	High	High	High	Phospho [S152(100); S627(100)]	1	1.08707	1.05095	1.02323	0.89774	0.933318	1.11178	0.995983	1.08453	2	2	2	2	2	2	2	2	2	0.157	0	48.8189	2
FALSE	High	Master Protein	Q69VQ4	Os09g0298700 protein OS=Oryza sativa subsp. japonica GN=Os09g0298700 PE=4 SV=1	0	15.8443	2.08955	2	26	2	1	1005	110.776	7.27	High	High	High	High	High	High	High	High	High	Phospho [T91(100)]	1	0.88001	0.920297	0.989024	0.989223	1.14539	1.1686	1.22361	1.29685	1	1	1	1	1	1	1	1	1	0.311	0	30.7364	1
FALSE	High	Master Protein	Q84SC5	Os08g0162600 protein OS=Oryza sativa subsp. japonica GN=P0577B11.138 PE=2 SV=1	0	15.8245	6.92308	1	7	1	1	260	27.469	9.79	High	High	High	High	High	High	High	High	High	Phospho [S445(100)]	1	1.11752	1.0643	1.17373	1.15208	1.14344	1.60232	1.47332	1.62739	4	4	4	4	4	4	4	4	4	0.374	0	47.1032	1
FALSE	High	Master Protein	Q6ZD92	Os08g0157100 protein OS=Oryza sativa subsp. japonica GN=Os08g0157100 PE=4 SV=1	0	15.7973	3.10421	1	24	1	1	451	52.127	6.11	High	High	High	High	High	High	High	High	High	Phospho [S52(99.6)]	1	1.14087	1.02711	1.15907	1.04753	0.927454	1.33811	1.26107	1.39336	2	2	2	2	2	2	2	2	2	0.35	0	50.272	1
FALSE	High	Master Protein	Q94EF2	Os01g0770000 protein OS=Oryza sativa subsp. japonica GN=Os01g0770000 PE=2 SV=1	0	15.6749	3.0888	1	15	1	1	518	56.501	7.47	High	High	High	High	High	High	High	High	High	Phospho [S65(100)]	1	1.06373	1.07861	1.13464	1.15208	1.08089	1.20742	1.27355	1.28478	1	1	1	1	1	1	1	1	1	0.084	0	40.5584	1
FALSE	High	Master Protein	Q6K1Y4	Os02g0608100 protein OS=Oryza sativa subsp. japonica GN=Os02g0608100 PE=4 SV=1	0	15.6688	2.22743	1	10	1	1	853	97.042	6.58	High	High	High	High	High	High	High	High	High	Phospho [S18(100); S22(99.1)]	1	1.14696	1.00422	1.20207	1.25663	1.18546	1.42524	1.45508	1.37285	2	2	2	2	2	2	2	2	2	0.241	0	10.4289	1
FALSE	High	Master Protein	A0A0P0WP57	Os05g0490000 protein (Fragment) OS=Oryza sativa subsp. japonica GN=Os05g0490000 PE=4 SV=1	0	15.6656	3.56537	1	3	1	1	589	67.344	4.93	High	High	High	High	High	High	High	High	High	Phospho [S411(99.5)]	1	0.970345	0.848771	0.969478	0.886682	0.85318	1.13545	1.13237	1.16173	1	1	1	1	1	1	1	1	1	0.222	0	34.7679	1
FALSE	High	Master Protein	Q7XDA3	Aminotransferase, classes I and II family protein, expressed OS=Oryza sativa subsp. japonica GN=LOC_Os10g34350 PE=3 SV=2	0	15.6027	4.61165	1	13	1	1	412	45.154	6.47	High	High	High	High	High	High	High	High	High	Phospho [S50(100)]	1	1.07794	0.947954	1.06134	0.944989	0.985115	1.11272	1.09587	1.19189	3	3	3	3	3	3	3	3	3	0.148	0	37.3542	2
FALSE	High	Master Protein	Q7Y0C6	Os03g0765800 protein OS=Oryza sativa subsp. japonica GN=OSJNBa0079B15.16 PE=4 SV=1	0	15.4752	2.99465	2	15	2	1	935	102.399	5.55	High	High	High	High	High	High	High	High	High	Phospho [S148(99.2); S1101(100)]	1	1.03531	1.1282	1.22944	1.03848	1.06721	1.03886	1.07762	1.07126	2	2	2	2	2	2	2	2	2	0.124	0	47.8064	2
FALSE	High	Master Protein	Q0IVQ5	Os10g0559700 protein (Fragment) OS=Oryza sativa subsp. japonica GN=Os10g0559700 PE=4 SV=1	0	15.4719	2.85955	2	27	2	1	1189	126.383	5.05	High	High	High	High	High	High	High	High	High	Phospho [Y316(100)]	1	1.03226	1.02902	1.0203	1.12494	1.00075	0.971622	0.957565	0.968715	5	5	5	5	5	5	5	5	5	0.778	0	20.9111	4
FALSE	High	Master Protein	P0C389	Cytochrome f OS=Oryza sativa subsp. japonica GN=petA PE=3 SV=1	0	15.4671	12.8125	4	9	4	1	320	35.445	8.91	High	High	High	High	High	High	High	High	High	Phospho [S15(100)]	1	1.08707	0.939371	0.994888	0.96208	0.818974	0.989615	1.01327	0.998874	1	1	1	1	1	1	1	1	1	0.585	0	67.0513	1
FALSE	High	Master Protein	Q9SXV0	Cytochrome c oxidase subunit 6b OS=Oryza sativa subsp. japonica GN=COX6b-1 PE=2 SV=1	0	15.3841	11.2426	1	31	1	1	169	18.901	4.3	High	High	High	High	High	High	High	High	High	Phospho [S118(100); S131(100)]	1	0.887115	0.843049	0.852202	0.785145	0.741768	0.883551	0.931633	1.13157	3	3	3	3	3	3	3	3	3	0.778	0	14.2589	3
FALSE	High	Master Protein	A0A0P0VIS4	Os02g0461600 protein (Fragment) OS=Oryza sativa subsp. japonica GN=Os02g0461600 PE=4 SV=1	0	15.3839	11.4537	3	4	3	1	227	26.222	11	High	High	High	High	High	High	High	High	High	Phospho [S143(100)]	1	1.18654	1.00517	1.05255	1.04451	1.00368	1.17523	1.05169	1.35475	1	1	1	1	1	1	1	1	1	0.101	0	18.6018	1
FALSE	High	Master Protein	Q67WK6	Os06g0227200 protein OS=Oryza sativa subsp. japonica GN=Os06g0227200 PE=2 SV=1	0	15.3763	4.26136	1	5	1	1	704	75.864	9.72	High	High	High	High	High	High	High	High	High	Phospho [S40(100); S50(100); S52(100)]	1	1.03734	0.924112	1.16787	0.968111	0.984137	1.52278	1.36864	1.68168	2	2	2	2	2	2	2	2	2	0.311	0	17.8521	2
FALSE	High	Master Protein	Q5ZEM9	Protein-lysine N-methyltransferase P0684C01.7-1 OS=Oryza sativa subsp. japonica GN=P0684C01.7-1 PE=2 SV=1	0	15.3539	10.8187	2	4	2	1	342	36.438	4.56	High	High	High	High	High	High	High	High	High	Phospho [S280(100)]	1	0.933805	0.946046	1.0633	0.968111	0.852202	1.31254	1.12852	1.08815	2	2	2	2	2	2	2	2	2	0.084	0	34.553	1
FALSE	High	Master Protein	Q337R2	MT-A70 family protein, expressed OS=Oryza sativa subsp. japonica GN=Os10g0447600 PE=2 SV=1	0	15.2712	1.57947	1	12	1	1	1013	113.541	6.62	High	High	High	High	High	High	High	High	High	Phospho [S151(100); S278(100)]	1	1.14493	1.02329	0.845361	0.869591	0.804315	0.976357	0.952763	1.01697	4	4	4	4	4	4	4	4	4	0.52	0	31.6342	3
FALSE	High	Master Protein	Q7XXI7	OSJNBa0094O15.15 protein OS=Oryza sativa subsp. japonica GN=Os04g0105100 PE=2 SV=2	0	15.2593	9.36819	3	19	3	1	459	49.89	9.03	High	High	High	High	High	High	High	High	High	Phospho [S46(100); S48(100); S160(100); S246(100); S248(100)]	1	1.17741	1.00041	1.20598	1.04351	1.10532	1.41955	1.1583	1.5719	2	2	2	2	2	2	2	2	2	0.487	0	113.006	5
FALSE	High	Master Protein	Q65XI3	Os05g0105900 protein OS=Oryza sativa subsp. japonica GN=Os05g0105900 PE=2 SV=1	0	15.1344	7.63158	5	47	2	1	380	42.409	12.18	High	High	High	High	High	High	High	High	High	Phospho [S20(99.3); S197(100); S201(100); S203(100); S218(100); S220(100)]	1	1.10331	0.876428	0.968501	0.851496	0.878589	0.97541	0.960446	1.0037	3	3	3	3	3	3	3	3	3	0.54	0	62.4543	3
FALSE	High	Master Protein	Q10L03	Os03g0363800 protein OS=Oryza sativa subsp. japonica GN=Os03g0363800 PE=2 SV=1	0	15.1073	13.5802	3	25	3	1	243	27.765	10.83	High	High	High	High	High	High	High	High	High	Phospho [S323(100)]	1	1.01196	0.737191	0.782814	0.736891	0.711472	0.705515	0.761634	0.728647	2	2	2	2	2	2	2	2	2	0.668	0	45.8454	1
FALSE	High	Master Protein	Q65X46	Os05g0543700 protein OS=Oryza sativa subsp. japonica GN=Os05g0543700 PE=2 SV=1	0	15.1006	3.25444	1	16	1	1	338	37.879	6.58	High	High	High	High	High	High	High	High	High	Phospho [T349(100); S439(100)]	1	1.13376	0.986101	1.01834	0.881655	0.880544	0.97541	0.954684	1.19069	1	1	1	1	1	1	1	1	1	0.334	0	68.8071	3
FALSE	High	Master Protein	Q75GI3	Alpha tubulin OS=Oryza sativa subsp. japonica GN=OSJNBb0122C16.10 PE=2 SV=1	0	15.0235	9.31264	3	30	1	1	451	49.787	5.02	High	High	High	High	High	High	High	High	High	Phospho [S162(100); S530(100)]	1	1.07286	0.844957	0.929409	0.893719	0.795519	1.02276	1.03344	0.981985	2	2	2	2	2	2	2	2	2	0.233	0	26.5723	2
FALSE	High	Master Protein	Q6ZBF6	BRI1-KD interacting protein 131 OS=Oryza sativa subsp. japonica GN=bip131 PE=2 SV=1	0	14.9707	4.34783	2	8	2	1	621	69.27	8.72	High	High	High	High	High	High	High	High	High	Phospho [S264(100)]	1	1.08809	0.996591	0.793564	0.669535	0.666516	0.561571	0.51576	0.565787	1	1	1	1	1	1	1	1	1	0.585	0	37.199	1
FALSE	High	Master Protein	Q8RZQ8	Bidirectional sugar transporter SWEET1a OS=Oryza sativa subsp. japonica GN=SWEET1A PE=2 SV=1	0	14.9696	6.59341	1	9	1	1	273	29.483	8.31	High	High	High	High	High	High	High	High	High	Phospho [S412(100)]	1	1.15609	1.07289	1.11803	1.01838	1.03202	1.43092	1.36479	1.53571	1	1	1	1	1	1	1	1	1	0.16	0	37.7417	1
FALSE	High	Master Protein	Q6ATX4	Os05g0470800 protein OS=Oryza sativa subsp. japonica GN=Os05g0470800 PE=4 SV=1	0	14.9407	3.07692	1	9	1	1	520	56.334	5.91	High	High	High	High	High	High	High	High	High	Phospho [T54(94.3)]	1	1.12158	1.17874	1.14246	1.16515	1.06037	1.38357	1.35903	1.56587	3	3	3	3	3	3	3	3	3	0.199	0	28.4295	3
FALSE	High	Master Protein	Q10RJ4	ABC transporter family protein, putative, expressed OS=Oryza sativa subsp. japonica GN=LOC_Os03g06139 PE=4 SV=1	0	14.6785	5.31777	3	18	3	1	771	84.79	8.15	High	High	High	High	High	High	High	High	High	Phospho [S41(100)]	1	1.26571	0.731469	1.12682	0.923878	0.699744	1.60043	1.72208	1.58758	2	2	2	2	2	2	2	2	2	1.512	0	25.2364	1
FALSE	High	Master Protein	Q0E0T0	Os02g0525600 protein OS=Oryza sativa subsp. japonica GN=Os02g0525600 PE=4 SV=1	0	14.6507	14.9123	1	8	1	1	114	11.377	10.24	High	High	High	High	High	High	High	High	High	Phospho [S238(100); S244(100)]	1	1.13579	1.05667	1.1493	1.05658	1.11998	1.13072	1.10259	1.1545	1	1	1	1	1	1	1	1	1	0.119	0	15.2376	1
FALSE	High	Master Protein	Q2QPI8	Os12g0527800 protein OS=Oryza sativa subsp. japonica GN=Os12g0527800 PE=2 SV=1	0	14.6237	3.19767	1	3	1	1	688	76.109	9.03	High	High	High	High	High	High	High	High	High	Phospho [S24(100)]	1	1.05764	1.03474	1.04668	1.04451	0.960682	1.35516	1.22073	1.38009	2	2	2	2	2	2	2	2	2	0.35	0	59.0897	1
FALSE	High	Master Protein	B7F9Q5	Os06g0474200 protein OS=Oryza sativa subsp. japonica GN=Os06g0474200 PE=2 SV=1	0	14.6229	3.97727	1	22	1	1	352	39.333	5.19	High	High	High	High	High	High	High	High	High	Phospho [S285(100)]	1	1.00993	0.931741	0.95775	0.748954	0.861975	1.17712	1.11892	1.26428	2	2	2	2	2	2	2	2	2	0.438	0	8.29339	1
FALSE	High	Master Protein	Q6Z343	Os02g0726400 protein OS=Oryza sativa subsp. japonica GN=Os02g0726400 PE=4 SV=1	0	14.6216	5.61056	1	4	1	1	303	33.869	4.75	High	High	High	High	High	High	High	High	High	Phospho [S607(98.1); S624(100); S636(100)]	1	1.04038	0.967027	1.05548	0.944989	1.01248	1.05022	1.14101	1.11589	2	2	2	2	2	2	2	2	2	0.218	0	34.23	2
FALSE	High	Master Protein	Q8LI83	Os01g0384300 protein OS=Oryza sativa subsp. japonica GN=OSJNBb0093M23.7 PE=3 SV=1	0	14.5914	5.3125	2	17	2	1	640	67.615	6.95	High	High	High	High	High	High	High	High	High	Phospho [S7(100)]	1	1.04749	0.989915	1.076	0.829379	0.81702	1.0417	0.921068	0.969921	2	2	2	2	2	2	2	2	2	0.492	0	53.5505	2
FALSE	High	Master Protein	A0A0P0XFY6	Os08g0416400 protein OS=Oryza sativa subsp. japonica GN=Os08g0416400 PE=4 SV=1	0	14.5237	3.06905	2	17	2	1	391	44.335	5.12	High	High	High	High	High	High	High	High	High	Phospho [S168(99.7)]	1	1.05459	1.01948	1.16494	1.03145	1.076	1.20648	1.09107	1.20637	1	1	1	1	1	1	1	1	1	0.259	0	40.0337	1
FALSE	High	Master Protein	Q5TKQ1	Os05g0540900 protein OS=Oryza sativa subsp. japonica GN=Os05g0540900 PE=2 SV=1	0	14.5137	3.7234	1	14	1	1	376	41.367	7.8	High	High	High	High	High	High	High	High	High	Phospho [S174(99)]	1	1.2718	1.16825	1.01248	0.760013	0.734927	0.932795	0.780843	0.977159	3	3	3	3	3	3	3	3	3	0.11	0	22.9041	2
FALSE	High	Master Protein	Q0DVY2	Os03g0107400 protein (Fragment) OS=Oryza sativa subsp. japonica GN=Os03g0107400 PE=4 SV=1	0	14.5047	4	2	11	2	1	950	106.688	5.11	High	High	High	High	High	High	High	High	High	Phospho [S157(100)]	1	1.11651	1.06335	1.07209	1.06864	1.06721	1.21784	1.22169	1.32942	2	2	2	2	2	2	2	2	2	0.995	0	27.4544	1
FALSE	High	Master Protein	Q0JAI2	OSJNba0093F12.16 protein OS=Oryza sativa subsp. japonica GN=Os04g0598200 PE=3 SV=1	0	14.4864	9.63855	1	9	1	1	166	17.737	9.16	High	High	High	High	High	High	High	High	High	Phospho [S88(99.2); S230(100)]	1	1.05764	0.938417	0.973387	0.885676	0.858066	1.04738	0.960446	1.00611	2	2	2	2	2	2	2	2	2	0.292	0	40.2358	2
FALSE	High	Master Protein	A0A0P0XB22	Os08g0110800 protein OS=Oryza sativa subsp. japonica GN=Os08g0110800 PE=4 SV=1	0	14.4715	10.5919	2	9	2	1	321	32.833	4.64	High	High	High	High	High	High	High	High	High	Phospho [S76(100)]	1	0.556223	0.763894	0.655766	0.657471	0.687039	0.65343	0.682877	0.716583	2	2	2	2	2	2	2	2	2	0.931	0	12.6271	2
FALSE	High	Master Protein	A0A0P0XAM8	Os07g0662800 protein OS=Oryza sativa subsp. japonica GN=Os07g0662800 PE=4 SV=1	0	14.4654	19.708	2	3	2	1	137	14.66	9.26	High	High	High	High	High	High	High	High	High	Phospho [S177(100); S181(100)]	1	1.12361	0.995637	0.818974	0.76705	0.732972	0.839989	0.784685	1.00129	1	1	1	1	1	1	1	1	1	0.585	0	25.7054	1
FALSE	High	Master Protein	Q0JKN7	CASP-like protein OS=Oryza sativa subsp. japonica GN=Os01g0661000 PE=2 SV=1	0	14.46	3.45679	1	7	1	1	405	41.89	5.64	High	High	High	High	High	High	High	High	High	Phospho [S472(100); S475(99.3)]	1	1.07083	1.05953	1.14832	0.948005	0.984137	1.71028	1.68078	1.76492	2	2	2	2	2	2	2	2	2	0.194	0	17.6132	1
FALSE	High	Master Protein	Q94H83	DnaJ domain containing protein, expressed OS=Oryza sativa subsp. japonica GN=LOC_Os03g28310 PE=4 SV=1	0	14.4254	2.27273	1	6	1	1	748	83.353	7.65	High	High	High	High	High	High	High	High	High	Phospho [S82(98.1)]	1	1.05358	0.95749	1.08871	0.99626	1.04375	1.49247	1.21689	1.67927	2	2	2	2	2	2	2	2	2	0.186	0	15.511	1
FALSE	High	Master Protein	Q337E2	Expressed protein OS=Oryza sativa subsp. japonica GN=Os10g0505900 PE=4 SV=1	0	14.3974	4.26009	1	11	1	1	446	45.554	4.87	High	High	High	High	High	High	High	High	High	Phospho [S123(100); S208(100); T363(99.5)]	1	1.0282	0.947	0.879567	0.862554	0.848293	1.13261	1.09587	1.27151	3	3	3	3	3	3	3	3	3	0.225	0	22.5512	3
FALSE	High	Master Protein	Q7XIJ5	Os07g0546100 protein OS=Oryza sativa subsp. japonica GN=OJ1612_A04.102 PE=4 SV=1	0	14.3824	10.5461	3	10	3	1	531	56.718	9.98	High	High	High	High	High	High	High	High	High	Phospho [S228(100)]	1	1.06982	1.08147	1.0115	1.08171	0.952864	1.11272	1.08819	1.14605	2	2	2	2	2	2	2	2	2	0.162	0	12.7785	2
FALSE	High	Master Protein	P0C506	DNA-directed RNA polymerase subunit beta' OS=Oryza sativa subsp. japonica GN=rpoC1 PE=3 SV=1	0	14.3575	3.51906	2	6	2	1	682	78.081	8.88	High	High	High	High	High	High	High	High	High	Phospho [S193(99.6); S207(100)]	1	1.19365	0.978471	1.0848	0.99626	0.901067	1.04928	1.05073	1.11227	3	3	3	3	3	3	3	3	3	0.438	0	18.8119	3
FALSE	High	Master Protein	Q6AT41	Ninja-family protein Os05g0558800 OS=Oryza sativa subsp. japonica GN=Os05g0558800 PE=2 SV=1	0	14.3324	8.20399	3	8	3	1	451	46.945	5.5	High	High	High	High	High	High	High	High	High	Phospho [S98(100); S101(99); S116(100)]	1	1.10128	0.997545	1.06525	1.04451	0.949932	1.14208	1.12948	1.20034	3	3	3	3	3	3	3	3	3	0.274	0	31.7361	2
FALSE	High	Master Protein	Q10N66	Ankyrin repeat family protein, putative, expressed OS=Oryza sativa subsp. japonica GN=Os03g0281000 PE=2 SV=1	0	14.3251	3.66569	2	12	2	1	682	73.216	9.57	High	High	High	High	High	High	High	High	High	Phospho [S410(100)]	1	1.07286	0.839235	1.31349	1.32299	1.0545	1.14303	1.13621	1.10142	2	2	2	2	2	2	2	2	2	0.157	0	45.5688	1
FALSE	High	Master Protein	A0A0P0WGH1	Os04g0682800 protein (Fragment) OS=Oryza sativa subsp. japonica GN=Os04g0682800 PE=4 SV=1	0	14.2632	0.852515	1	16	1	1	1173	125.717	5.14	High	High	High	High	High	High	High	High	High	Phospho [S370(100); T401(100); S439(100)]	1	1.01095	0.902177	0.912795	0.879644	0.855134	0.90912	0.919147	0.988017	3	3	3	3	3	3	3	3	3	0.233	0	29.3811	3
FALSE	High	Master Protein	Q6K8A9	Os02g0288200 protein OS=Oryza sativa subsp. japonica GN=Os02g0288200 PE=4 SV=1	0	14.2606	7.78547	3	9	3	1	578	61.487	6.07	High	High	High	High	High	High	High	High	High	Phospho [S280(100); S286(100)]	1	1.05967	1.16444	1.13562	1.40844	1.07893	1.72828	1.45508	1.41145	5	5	5	5	5	5	5	5	5	1.955	0	75.0888	4
FALSE	High	Master Protein	Q6AUG0	Splicing factor U2af small subunit B OS=Oryza sativa subsp. japonica GN=U2AF35B PE=2 SV=1	0	14.2176	4.27632	4	37	4	1	304	34.671	9.09	High	High	High	High	High	High	High	High	High	Phospho [S45(100); S313(100)]	1	1.03023	0.90027	0.930386	0.975149	0.867839	1.19796	1.20344	1.18827	2	2	2	2	2	2	2	2	2	0.16	0	23.511	2
FALSE	High	Master Protein	Q6K271	FCA OS=Oryza sativa subsp. japonica GN=P0415D04.46-1 PE=2 SV=1	0	14.2125	3.92954	2	5	2	1	738	79.609	8.98	High	High	High	High	High	High	High	High	High	Phospho [S193(100)]	1	0.839409	0.720979	0.759359	0.756997	0.689971	1.02655	1.04401	1.33304	2	2	2	2	2	2	2	2	2	0.145	0	12.8684	2
FALSE	High	Master Protein	Q6ZK48	Pre-mRNA-splicing factor SLU7 OS=Oryza sativa subsp. japonica GN=Os08g0127700 PE=2 SV=1	0	14.1854	4.66418	2	4	2	1	536	62.038	5.88	High	High	High	High	High	High	High	High	High	Phospho [S301(100); S304(100); S630(99.6)]	1	1.03937	1.04904	1.03398	0.925889	0.868816	1.00477	1.01231	1.08211	3	3	3	3	3	3	3	3	3	0.174	0	11.3662	2
FALSE	High	Master Protein	Q67WV5	Os06g0643000 protein OS=Oryza sativa subsp. japonica GN=Os06g0643000 PE=4 SV=1	0	14.1101	4.3662	2	4	2	1	710	79.714	6.1	High	High	High	High	High	High	High	High	High	Phospho [S62(100)]	1	0.819109	0.765802	0.725154	0.841443	0.731995	0.73866	0.720335	0.762425	2	2	2	2	2	2	2	2	2	1.371	0	25.0594	2
FALSE	High	Master Protein	Q6ZHP6	Os02g0715400 protein OS=Oryza sativa subsp. japonica GN=Os02g0715400 PE=4 SV=1	0	14.0704	18.8119	2	7	2	1	101	10.42	4.55	High	High	High	High	High	High	High	High	High	Phospho [T349(100); S437(100)]	1	1.39868	1.02425	1.01052	0.843453	0.800406	0.881657	0.836549	0.944587	2	2	2	2	2	2	2	2	2	0.334	1	29.7401	3
FALSE	High	Master Protein	Q53M52	Tubulin alpha-2 chain OS=Oryza sativa subsp. japonica GN=TUBA PE=2 SV=1	0	14.0121	9.31264	3	10	1	1	451	49.705	4.96	High	High	High	High	High	High	High	High	High	Phospho [S64(100)]	1	1.03023	1.0128	0.965569	0.942979	1.10434	1.08621	1.10163	1.32218	1	1	1	1	1	1	1	1	1	0.179	0	12.6723	1
FALSE	High	Master Protein	Q7Y163	Hepatocellular carcinoma-associated antigen 59 family protein, expressed OS=Oryza sativa subsp. japonica GN=LOC_Os03g25720 PE=2 SV=1	0	13.9805	8.66426	1	2	1	1	277	30.772	8.81	High	High	High	High	High	High	High	High	High	Phospho [S524(100); S529(100); S533(100)]	1	1.19771	1.08528	1.21869	1.1561	1.08578	1.1061	1.13813	1.22567	2	2	2	2	2	2	2	2	2	0.585	0	33.9911	2
FALSE	High	Master Protein	Q6UUW2	Sodium/hydrogen exchanger OS=Oryza sativa subsp. japonica GN=NHX2 PE=2 SV=1	0	13.8989	5.33088	2	11	2	1	544	59.606	7.59	High	High	High	High	High	High	High	High	High	Phospho [S68(97.8)]	1	1.25455	1.17016	1.54901	1.33203	1.17666	1.8296	1.75762	1.81679	1	1	1	1	1	1	1	1	1	0.116	0	18.599	1
FALSE	High	Master Protein	Q6ESZ1	Os02g0542400 protein OS=Oryza sativa subsp. japonica GN=Os02g0542400 PE=4 SV=1	0	13.7825	5.60976	1	8	1	1	410	46.637	6.76	High	High	High	High	High	High	High	High	High	Phospho [S237(100); T239(100)]	1	1.02719	0.95749	0.989024	1.14002	1.03398	1.51141	1.49157	1.48504	2	2	2	2	2	2	2	2	2	0.585	0	18.6644	2
FALSE	High	Master Protein	Q69K05	CAX-interacting protein 4 (CAXIP4)-like OS=Oryza sativa subsp. japonica GN=Os09g0103700 PE=2 SV=1	0	13.775	3.97878	2	6	2	1	377	42.009	9.35	High	High	High	High	High	High	High	High	High	Phospho [S91(98.6)]	1	1.17639	1.25122	0.927454	0.869591	0.777928	1.17996	0.973892	1.23894	1	1	1	1	1	1	1	1	1	0.076	0	10.0013	1
FALSE	High	Master Protein	Q84ZN6	Probable cellulose synthase A catalytic subunit 8 [UDP-forming] OS=Oryza sativa subsp. japonica GN=CESA8 PE=2 SV=1	0	13.6505	2.40518	1	9	1	1	1081	120.717	7.81	High	High	High	High	High	High	High	High	High	Phospho [S155(100); S161(100)]	1	1.02313	1.00422	1.01834	0.898745	0.914749	1.01045	0.948921	0.922873	1	1	1	1	1	1	1	1	1	0.08	0	27.7216	1
FALSE	High	Master Protein	Q0JF58	Protein argonaute 4B OS=Oryza sativa subsp. japonica GN=AGO4B PE=2 SV=1	0	13.5959	1.97585	1	7	1	1	911	101.676	8.9	High	High	High	High	High	High	High	High	High	Phospho [S53(98.5)]	1	1.04952	0.837327	0.811156	0.96208	0.964591	1.24341	1.22841	1.44523	2	2	2	2	2	2	2	2	2	0.15	0	14.2654	1
FALSE	High	Master Protein	Q7XRN9	OSJNBb0080H08.21 protein OS=Oryza sativa subsp. japonica GN=Os04g0131900 PE=4 SV=2	0	13.5815	4.10509	1	12	1	1	609	65.726	6.28	High	High	High	High	High	High	High	High	High	Phospho [S873(100)]	1	1.02617	0.908853	0.886408	0.768055	0.711472	0.695098	0.668471	0.667122	2	2	2	2	2	2	2	2	2	0.084	0	37.4694	1
FALSE	High	Master Protein	Q5Z9S8	ABC transporter G family member 42 OS=Oryza sativa subsp. japonica GN=ABCG42 PE=2 SV=1	0	13.5744	0.8	1	13	1	1	1500	169.021	8.57	High	High	High	High	High	High	High	High	High	Phospho [S534(99.1)]	1	1.19872	0.888826	1.09262	1.10684	0.908885	0.978251	0.985418	1.05075	2	2	2	2	2	2	2	2	2	0.148	0	8.71925	1
FALSE	High	Master Protein	Q6Z7B3	Heat shock factor protein hsf8-like OS=Oryza sativa subsp. japonica GN=Os02g0115600 PE=2 SV=1	0	13.526	2.8786	1	7	1	1	799	88.198	5.12	High	High	High	High	High	High	High	High	High	Phospho [S20(100); S24(100); S26(100); S127(99.4); S489(99.6); S1345(100); S1348(99.4)]	1	1.03734	0.946046	0.997819	0.934936	0.92159	1.06064	1.08146	1.19672	4	4	4	4	4	4	4	4	4	0.143	0	34.9982	4
FALSE	High	Master Protein	Q5SN81	Eukaryotic translation initiation factor 3 subunit 10-like OS=Oryza sativa subsp. japonica GN=Os01g0655400 PE=2 SV=1	0	13.4848	3.77778	4	13	4	1	1350	151.882	5.94	High	High	High	High	High	High	High	High	High	Phospho [S689(100)]	1	0.655693	0.45395	0.385055	0.471489	0.447602	0.433726	0.585872	0.861348	1	1	1	1	1	1	1	1	1	0.119	0	71.0792	1
FALSE	High	Master Protein	Q8S7Q0	Eukaryotic translation initiation factor 3 subunit B OS=Oryza sativa subsp. japonica GN=Os10g0569200 PE=2 SV=1	0	13.4805	1.94715	1	17	1	1	719	83.129	5.07	High	High	High	High	High	High	High	High	High	Phospho [S270(100); T833(98.5); T852(98.4); T872(99.5); T952(98.1)]	1	0.99572	1.04809	1.02127	0.965096	0.974364	1.07958	1.10451	1.12072	4	4	4	4	4	4	4	4	4	0.194	0	16.3175	4
FALSE	High	Master Protein	A0A0P0WXX3	Os06g0538200 protein OS=Oryza sativa subsp. japonica GN=Os06g0538200 PE=4 SV=1	0	13.4776	6.68757	4	9	4	1	957	104.745	4.49	High	High	High	High	High	High	High	High	High	Phospho [S103(100)]	1	1.12158	0.829698	1.06134	1.01335	0.959705	0.89965	1.04881	0.813093	2	2	2	2	2	2	2	2	2	0.407	0	31.4462	1
FALSE	High	Master Protein	Q9AS33	NPL4-like protein OS=Oryza sativa subsp. japonica GN=Os01g0377700 PE=2 SV=1	0	13.3394	2.40964	1	11	1	1	415	44.863	5.54	High	High	High	High	High	High	High	High	High	Phospho [S411(99.2)]	1	1.02211	1.07575	1.2441	1.0787	1.076	1.21216	1.22073	1.25824	2	2	2	2	2	2	2	2	2	0.109	0	9.24983	1
FALSE	High	Master Protein	A0A0P0Y2X9	Os11g0521900 protein (Fragment) OS=Oryza sativa subsp. japonica GN=Os11g0521900 PE=4 SV=1	0	13.3262	1.54976	1	5	1	1	1226	133.014	5.62	High	High	High	High	High	High	High	High	High	Phospho [T63(97.1)]	1	1.21598	1.12248	0.83852	0.731864	0.738836	1.01708	1.06706	1.13399	1	1	1	1	1	1	1	1	1	0.259	0	58.095	1
FALSE	High	Master Protein	A0A0P0WGP3	Os04g0689500 protein (Fragment) OS=Oryza sativa subsp. japonica GN=Os04g0689500 PE=4 SV=1	0	13.2343	5.61798	1	16	1	1	356	38.884	10.04	High	High	High	High	High	High	High	High	High	Phospho [S717(100); S722(100)]	1	1.0008	1.03283	0.918658	0.81631	0.814088	0.96594	0.987339	1.02662	2	2	2	2	2	2	2	2	2	0.155	0	30.9408	2
FALSE	High	Master Protein	Q0DJE5	Os05g0295900 protein OS=Oryza sativa subsp. japonica GN=Os05g0295900 PE=2 SV=1	0	13.2012	3.62812	2	14	2	1	882	95.81	5.91	High	High	High	High	High	High	High	High	High	Phospho [S60(100)]	1	1.11549	0.948907	1.13757	1.10383	1.01248	1.15534	1.2822	1.09418	1	1	1	1	1	1	1	1	1	0.186	0	15.8819	1
FALSE	High	Master Protein	Q6L5F3	Os05g0577700 protein OS=Oryza sativa subsp. japonica GN=Os05g0577700 PE=4 SV=1	0	13.1569	4.19948	1	8	1	1	381	42.459	7.97	High	High	High	High	High	High	High	High	High	Phospho [S108(100); S871(100)]	1	1.20075	1.04618	1.10434	1.02742	1.08578	1.21595	1.1727	1.26789	3	3	3	3	3	3	3	3	3	0.199	0	38.0258	2
FALSE	High	Master Protein	Q7Y0V7	Homeobox-leucine zipper protein ROC6 OS=Oryza sativa subsp. japonica GN=ROC6 PE=2 SV=2	0	13.1448	3.66972	2	12	2	1	872	91.662	6.13	High	High	High	High	High	High	High	High	High	Phospho [S135(100); S141(100); S145(100); S186(98.8)]	1	1.05561	0.874521	0.966546	0.925889	0.806269	1.05117	1.00175	1.19069	4	4	4	4	4	4	4	4	4	1.069	0	12.6246	4
FALSE	High	Master Protein	Q0JBF7	Os04g0534400 protein OS=Oryza sativa subsp. japonica GN=Os04g0534400 PE=2 SV=1	0	13.0973	16.4	4	12	4	1	250	27.676	5.85	High	High	High	High	High	High	High	High	High	Phospho [S12(100); S328(97)]	1	1.20075	1.05381	1.25192	1.13399	1.06428	1.22352	1.16694	1.21843	2	2	2	2	2	2	2	2	2	0.35	0	27.1957	2
FALSE	High	Master Protein	A0A0P0WEC1	Os04g0603000 protein OS=Oryza sativa subsp. japonica GN=Os04g0603000 PE=4 SV=1	0	13.076	8.84956	2	12	2	1	339	37.832	7.2	High	High	High	High	High	High	High	High	High	Phospho [T306(100)]	1	1.16726	1.05381	1.10141	0.957053	0.99391	1.2169	1.21208	1.38612	1	1	1	1	1	1	1	1	1	0.222	0	26.8666	1
FALSE	High	Master Protein	Q67WP0	Os06g0643600 protein OS=Oryza sativa subsp. japonica GN=Os06g0643600 PE=2 SV=1	0	13.0394	3.75	1	7	1	1	400	44.226	9.23	High	High	High	High	High	High	High	High	High	Phospho [S17(99.7); S118(100)]	1	1.01602	0.891687	0.907908	0.896735	0.881521	0.951735	0.972932	1.09176	2	2	2	2	2	2	2	2	2	0.995	0	53.2419	2
FALSE	High	Master Protein	Q69XK9	Os06g0601100 protein OS=Oryza sativa subsp. japonica GN=Os06g0601100 PE=2 SV=1	0	13.0379	15.4362	2	20	2	1	149	16.123	9.74	High	High	High	High	High	High	High	High	High	Phospho [S95(100); S113(100)]	1	0.89016	0.901224	0.944068	0.889697	0.905954	1.3561	1.28796	1.41748	2	2	2	2	2	2	2	2	2	0.874	0	35.0964	2
FALSE	High	Master Protein	Q2R2Z2	CCAAT transcription factor OS=Oryza sativa subsp. japonica GN=Os11g0544700 PE=2 SV=1	0	13.0097	10.8527	2	12	2	1	258	28.237	5.47	High	High	High	High	High	High	High	High	High	Phospho [S73(100)]	1	1.06474	0.951768	1.11216	1.03748	1.03496	1.22068	1.11796	1.29926	2	2	2	2	2	2	2	2	2	0.052	0	22.8935	2
FALSE	High	Master Protein	A0A0P0XYL0	Os10g0575200 protein (Fragment) OS=Oryza sativa subsp. japonica GN=Os10g0575200 PE=4 SV=1	0	13.0062	2.36407	2	8	2	1	1692	185.507	5.8	High	High	High	High	High	High	High	High	High	Phospho [S54(100); T56(100)]	1	1.1023	0.984193	1.03984	0.96409	0.880544	1.26709	1.09875	1.35717	2	2	2	2	2	2	2	2	2	0.848	0	73.1962	1
FALSE	High	Master Protein	Q0JD07	Zinc finger CCCH domain-containing protein 28 OS=Oryza sativa subsp. japonica GN=Os04g0438700 PE=2 SV=1	0	12.9459	2.89017	1	26	1	1	346	38.673	9.42	High	High	High	High	High	High	High	High	High	Phospho [S23(99.7); S34(100)]	1	1.30428	1.0128	1.25583	0.925889	0.959705	1.08621	0.912424	0.925285	2	2	2	2	2	2	2	2	2	0.668	0	25.0907	2
FALSE	High	Master Protein	Q9SDK0	Os01g0256400 protein OS=Oryza sativa subsp. japonica GN=Os01g0256400 PE=2 SV=1	0	12.9335	20	2	7	2	1	130	14.159	8.15	High	High	High	High	High	High	High	High	High	Phospho [S99(100); S151(99.2)]	1	1.09215	0.889779	1.00955	0.99626	0.856111	1.19796	1.10163	1.27151	3	3	3	3	3	3	3	3	3	0.166	0	11.8417	3
FALSE	High	Master Protein	Q10MH8	DEAD-box ATP-dependent RNA helicase 24 OS=Oryza sativa subsp. japonica GN=Os03g0308500 PE=2 SV=1	0	12.9171	4.67532	3	4	3	1	770	83.133	6.16	High	High	High	High	High	High	High	High	High	Phospho [S787(100)]	1	1.26267	1.28269	0.958728	0.752976	0.756427	0.703621	0.652143	0.726234	2	2	2	2	2	2	2	2	2	0.076	0	18.8444	2
FALSE	High	Master Protein	Q10L71	Os03g0356700 protein OS=Oryza sativa subsp. japonica GN=LOC_Os03g24220 PE=4 SV=1	0	12.8853	3.10559	2	7	2	1	966	106.054	5.82	High	High	High	High	High	High	High	High	High	Phospho [S117(100); S311(100)]	1	1.05155	0.73433	0.82777	1.05457	0.869794	1.03791	1.0709	1.27634	3	3	3	3	3	3	3	3	3	0.389	0	9.97036	2
FALSE	High	Master Protein	Q5QN03	Nuclear pore complex protein NUP35 OS=Oryza sativa subsp. japonica GN=Os01g0200500 PE=2 SV=1	0	12.8783	12.2324	2	3	2	1	327	35.37	9.58	High	High	High	High	High	High	High	High	High	Phospho [S119(99.4); S133(100)]	1	1.04952	0.916482	1.01248	0.949011	0.935272	1.3741	1.35231	1.55018	2	2	2	2	2	2	2	2	2	0.189	0	19.3024	2
FALSE	High	Master Protein	Q6L4Z4	Os05g0462400 protein OS=Oryza sativa subsp. japonica GN=Os05g0462400 PE=4 SV=1	0	12.8765	3.0543	2	7	2	1	884	97.29	4.48	High	High	High	High	High	High	High	High	High	Phospho [S125(100)]	1	1.10433	0.924112	0.970455	1.02139	0.950909	1.22921	1.36383	1.41748	1	1	1	1	1	1	1	1	1	0.136	0	14.6583	1
FALSE	High	Master Protein	Q688J5	Arginyl-tRNA--protein transferase OS=Oryza sativa subsp. japonica GN=Os05g0446800 PE=2 SV=1	0	12.8525	2.48447	1	4	1	1	644	72.398	7.87	High	High	High	High	High	High	High	High	High	Phospho [S158(100); S213(99.4); S216(99.4)]	1	1.1226	0.988008	0.97241	1.04049	0.82777	0.86177	0.983497	0.990429	4	4	4	4	4	4	4	4	4	0.557	0	31.7977	3
FALSE	High	Master Protein	A0A0P0WJI6	Os05g0232200 protein (Fragment) OS=Oryza sativa subsp. japonica GN=Os05g0232200 PE=4 SV=1	0	12.8361	4.39815	3	16	3	1	432	47.376	8.21	High	High	High	High	High	High	High	High	High	Phospho [S205(100)]	1	1.0079	1.03378	1.03496	0.942979	1.04962	1.1364	1.10643	1.2124	2	2	2	2	2	2	2	2	2	0.389	0	42.6039	1
FALSE	High	Master Protein	Q6ZA53	Os07g0172200 protein OS=Oryza sativa subsp. japonica GN=P0496D04.23-1 PE=4 SV=1	0	12.7844	2.7248	1	12	1	1	367	39.599	8.5	High	High	High	High	High	High	High	High	High	Phospho [S137(100); S254(100); S256(100); S273(100); S275(100)]	1	0.968315	0.868799	1.00368	0.909804	0.826793	1.06159	1.02576	1.04472	3	3	3	3	3	3	3	3	3	0.557	0	37.1821	3
FALSE	High	Master Protein	B7EY91	Os02g0274700 protein OS=Oryza sativa subsp. japonica GN=Os02g0274700 PE=2 SV=1	0	12.7815	8.16327	3	14	3	1	343	39.547	10.48	High	High	High	High	High	High	High	High	High	Phospho [S37(100); S38(100); S67(100)]	1	1.03632	1.10817	1.19914	1.12092	1.06916	1.23584	1.09683	1.21602	1	1	1	1	1	1	1	1	1	0.28	0	45.4889	2
FALSE	High	Master Protein	A0A0N7KDZ0	Os01g0819100 protein (Fragment) OS=Oryza sativa subsp. japonica GN=Os01g0819100 PE=4 SV=1	0	12.7811	6.96379	2	16	1	1	359	39.676	7.49	High	High	High	High	High	High	High	High	High	Phospho [S544(100); S565(100)]	1	1.09722	1.13011	1.09555	0.915835	0.859043	0.970675	0.950842	1.07849	3	3	3	3	3	3	3	3	3	0.28	0	15.2295	2
FALSE	High	Master Protein	Q8W0B8	Os01g0227200 protein OS=Oryza sativa subsp. japonica GN=Os01g0227200 PE=2 SV=1	0	12.7687	5.19263	2	5	2	1	597	63.965	7.72	High	High	High	High	High	High	High	High	High	Phospho [S33(100); S581(100)]	1	1.14493	1.06526	0.980228	0.843453	0.81702	1.08053	1.02576	1.25101	3	3	3	3	3	3	3	3	3	0.301	0	43.3112	2
FALSE	High	Master Protein	Q6Z901	Kinesin light chain-like protein OS=Oryza sativa subsp. japonica GN=Os02g0109800 PE=2 SV=1	0	12.7135	4.00668	2	19	2	1	599	64.904	5.47	High	High	High	High	High	High	High	High	High	Phospho [S310(100)]	1	0.96527	0.857354	0.879567	0.874618	0.85318	0.964046	0.987339	1.13399	1	1	1	1	1	1	1	1	1	0.468	0	95.7201	1
FALSE	High	Master Protein	Q84SS3	Os03g0454100 protein OS=Oryza sativa subsp. japonica GN=Os03g0454100 PE=2 SV=1	0	12.6432	3.59712	1	27	1	1	417	46.211	6.2	High	High	High	High	High	High	High	High	High	Phospho [S141(100)]	1	1.2109	1.02616	1.13269	1.03647	0.966546	1.27371	1.23705	1.32097	1	1	1	1	1	1	1	1	1	1.512	0	22.2817	4
FALSE	High	Master Protein	Q7GBK0	Histone H2B.7 OS=Oryza sativa subsp. japonica GN=H2B.7 PE=2 SV=1	0	12.6355	20.2614	4	8	1	1	153	16.464	10.02	High	High	High	High	High	High	High	High	High	Phospho [S237(99.6)]	1	0.939895	0.999452	1.06037	1.1179	1.09066	1.86085	1.83061	2.01343	2	2	2	2	2	2	2	2	2	0.094	0	11.9493	1
FALSE	High	Master Protein	Q6K7R9	DEAD-box ATP-dependent RNA helicase 48 OS=Oryza sativa subsp. japonica GN=Os02g0826100 PE=2 SV=1	0	12.6339	2.09618	1	5	1	1	811	91.745	9.48	High	High	High	High	High	High	High	High	High	Phospho [S250(100)]	1	1.53469	1.01376	1.50797	1.27875	1.32619	1.82013	1.7701	1.90848	2	2	2	2	2	2	2	2	2	0.501	0	22.327	2
FALSE	High	Master Protein	Q9LGR1	Os01g0184800 protein OS=Oryza sativa subsp. japonica GN=Os01g0184800 PE=2 SV=1	0	12.6308	5.9761	2	7	2	1	251	28.36	4.7	High	High	High	High	High	High	High	High	High	Phospho [S143(100)]	1	0.98354	1.06526	1.00075	0.989223	1.00368	1.02087	1.0757	0.972334	4	4	4	4	4	4	4	4	4	1.512	3	22.4625	4
FALSE	High	Master Protein	Q94JE1	Histone H2B.5 OS=Oryza sativa subsp. japonica GN=H2B.5 PE=3 SV=1	0	12.5699	20	4	8	1	1	155	16.747	10.02	High	High	High	High	High	High	High	High	High	Phospho [S158(99.5); S186(100); S188(100); S190(100); S208(97.9); S210(100); S214(100); S216(100)]	1	1.03328	0.929834	1.08382	0.925889	0.848293	0.91859	0.972932	0.966302	2	2	2	2	2	2	2	2	2	0.65	0	23.6373	4
FALSE	High	Master Protein	Q10N19	Os03g0285900 protein OS=Oryza sativa subsp. japonica GN=LOC_Os03g17710 PE=4 SV=1	0	12.5573	11.2121	4	11	2	1	330	37.02	11	High	High	High	High	High	High	High	High	High	Phospho [S210(98.9)]	1	1.04343	1.06526	1.05059	0.949011	0.961659	1.07295	1.02768	1.01576	2	2	2	2	2	2	2	2	2	0.369	0	61.4519	1
FALSE	High	Master Protein	Q5NAI9	Os01g0710000 protein OS=Oryza sativa subsp. japonica GN=Os01g0710000 PE=2 SV=1	0	12.5227	2.42826	1	40	1	1	453	50.08	6.3	High	High	High	High	High	High	High	High	High	Phospho [S664(99.3)]	1	1.0414	0.907899	1.04864	0.978165	1.01346	1.25477	1.22073	1.39215	1	1	1	1	1	1	1	1	1	0.133	0	31.1323	1
FALSE	High	Master Protein	B9GCH9	Urease OS=Oryza sativa subsp. japonica GN=Os12g0234800 PE=3 SV=2	0	12.5066	2.01661	1	18	1	1	843	90.423	5.78	High	High	High	High	High	High	High	High	High	Phospho [S19(100); S20(99.7)]	1	1.16015	0.982286	0.928431	0.738901	0.669448	0.970675	0.898978	1.05919	2	2	2	2	2	2	2	2	2	0.166	0	23.8678	1
FALSE	High	Master Protein	Q8L465	Os07g0633600 protein OS=Oryza sativa subsp. japonica GN=P0455H11.104 PE=4 SV=1	0	12.321	2.22222	1	7	1	1	585	66.671	8.41	High	High	High	High	High	High	High	High	High	Phospho [S172(100)]	1	1.05155	1.04618	0.949932	0.966101	0.951886	1.5152	1.384	1.52364	1	1	1	1	1	1	1	1	1	0.931	0	14.2161	1
FALSE	High	Master Protein	Q7XKE1	OSJNBb0017I01.13 protein OS=Oryza sativa subsp. japonica GN=Os04g0679900 PE=2 SV=1	0	12.2276	6.91244	1	5	1	1	217	24.418	5.1	High	High	High	High	High	High	High	High	High	Phospho [S374(100)]	1	1.13478	1.0109	1.01541	0.953032	0.950909	1.06443	1.07474	1.14364	2	2	2	2	2	2	2	2	2	0.318	0	31.4334	2
FALSE	High	Master Protein	Q5QMV0	Os01g0512100 protein OS=Oryza sativa subsp. japonica GN=Os01g0512100 PE=2 SV=1	0	12.1572	6.94789	2	15	2	1	403	44.931	6.24	High	High	High	High	High	High	High	High	High	Phospho [S140(100)]	1	0.952075	1.0643	1.03398	1.08473	1.03007	1.11841	1.05745	1.21843	1	1	1	1	1	1	1	1	1	1.512	0	23.8626	4
FALSE	High	Master Protein	A3AGM4	Histone H2B.1 OS=Oryza sativa subsp. japonica GN=H2B1 PE=1 SV=1	0	12.1472	20.3947	4	9	1	1	152	16.497	10.11	High	High	High	High	High	High	High	High	High	Phospho [S610(100)]	1	1.0211	0.937463	0.977296	0.903772	0.955796	1.20837	1.31197	1.25462	1	1	1	1	1	1	1	1	1	0.145	0	22.5108	1
FALSE	High	Master Protein	Q6K5Q1	Os02g0491400 protein OS=Oryza sativa subsp. japonica GN=Os02g0491400 PE=4 SV=1	0	12.1012	2.34604	1	5	1	1	682	74.763	5.29	High	High	High	High	High	High	High	High	High	Phospho [S6(100); S13(99.4)]	1	0.99369	0.796319	0.837543	0.852501	0.801383	0.800215	0.8183	0.879443	2	2	2	2	2	2	2	2	2	0.199	0	32.7477	1
FALSE	High	Master Protein	Q2QX93	Os12g0165000 protein OS=Oryza sativa subsp. japonica GN=LOC_Os12g06810 PE=4 SV=1	0	12.0653	1.8617	1	9	1	1	752	81.885	7.31	High	High	High	High	High	High	High	High	High	Phospho [S84(100)]	1	1.07591	0.945093	0.949932	0.898745	0.879567	1.16481	1.08242	1.29564	1	1	1	1	1	1	1	1	1	1.512	0	27.759	1
FALSE	High	Master Protein	Q5W6B4	Os05g0270400 protein OS=Oryza sativa subsp. japonica GN=Os05g0270400 PE=2 SV=1	0	12.0424	15.2	1	9	1	1	125	12.733	7.43	High	High	High	High	High	High	High	High	High	Phospho [S413(100)]	1	1.14493	0.930788	1.10825	0.945995	0.940159	1.07863	1.03344	1.05919	2	2	2	2	2	2	2	2	2	0.25	0	27.7127	2
FALSE	High	Master Protein	Q75H96	Os03g0666200 protein OS=Oryza sativa subsp. japonica GN=Os03g0666200 PE=4 SV=1	0	12.0318	3.8	2	9	2	1	500	54.527	5.33	High	High	High	High	High	High	High	High	High	Phospho [S78(100)]	1	0.891175	0.721933	0.697789	0.776098	0.715381	0.717826	0.79717	0.791378	2	2	2	2	2	2	2	2	2	0.995	0	57.4651	1
FALSE	High	Master Protein	Q0E3V2	Os02g0152900 protein OS=Oryza sativa subsp. japonica GN=Os02g0152900 PE=2 SV=1	0	12.0294	8.48485	1	19	1	1	165	17.079	10.08	High	High	High	High	High	High	High	High	High	Phospho [S71(100); S82(100)]	1	1.05155	0.86403	0.712449	0.63837	0.702676	0.927113	0.725137	0.955445	1	1	1	1	1	1	1	1	1	0.468	0	6.06269	1
FALSE	High	Master Protein	Q688K3	Os05g0417500 protein OS=Oryza sativa subsp. japonica GN=Os05g0417600 PE=2 SV=1	0	11.9674	15.1786	1	1	1	1	112	12	10.13	High	High	High	High	High	High	High	High	High	Phospho [S35(100)]	1	1.12564	0.883104	1.07014	0.952027	0.960682	1.07579	1.05457	1.08815	2	2	2	2	2	2	2	2	2	0.54	0	15.9381	1
FALSE	High	Master Protein	Q0IVD2	Os10g0578000 protein OS=Oryza sativa subsp. japonica GN=Os10g0578000 PE=4 SV=1	0	11.9577	4.56432	1	6	1	1	241	27.095	5.26	High	High	High	High	High	High	High	High	High	Phospho [S36(100); S42(100)]	1	1.07286	1.04618	1.04864	0.987212	0.894226	1.36463	1.32446	1.53571	3	3	3	3	3	3	3	3	3	0.269	0	29.2316	2
FALSE	High	Master Protein	Q93W00	Os01g0367700 protein OS=Oryza sativa subsp. japonica GN=P0560B06.11 PE=3 SV=1	0	11.9547	3.76344	2	17	2	1	558	61.707	9.85	High	High	High	High	High	High	High	High	High	Phospho [S48(99.7)]	1	1.08606	1.10436	1.15125	1.01235	0.980228	0.900597	0.851916	0.848078	2	2	2	2	2	2	2	2	2	0.874	0	33.5693	1
FALSE	High	Master Protein	Q337E7	Os10g0503800 protein OS=Oryza sativa subsp. japonica GN=Os10g0503800 PE=2 SV=2	0	11.9535	7.5188	1	13	1	1	133	14.257	5.1	High	High	High	High	High	High	High	High	High	Phospho [S89(100)]	1	0.980495	0.895502	0.918658	0.875623	0.916704	1.13166	1.00078	1.04834	2	2	2	2	2	2	2	2	2	0.52	0	7.06763	2
FALSE	High	Master Protein	Q2QLR2	Glycine-rich RNA-binding protein GRP1A, putative, expressed OS=Oryza sativa subsp. japonica GN=Os12g0632000 PE=2 SV=1	0	11.9195	14.1975	2	2	2	1	162	16.073	6.74	High	High	High	High	High	High	High	High	High	Phospho [S95(100)]	1	1.17233	0.960351	1.29101	1.07266	1.04668	1.42524	1.30429	1.58396	2	2	2	2	2	2	2	2	2	0.274	0	11.2373	2
FALSE	High	Master Protein	Q6K700	Os02g0821900 protein OS=Oryza sativa subsp. japonica GN=Os02g0821900 PE=2 SV=1	0	11.9166	12.0275	2	5	2	1	291	32.194	5.68	High	High	High	High	High	High	High	High	High	Phospho [S89(100)]	1	1.30124	0.829698	1.64283	1.37727	1.21478	1.59475	1.51078	1.67565	2	2	2	2	2	2	2	2	2	0.389	0	9.88916	2
FALSE	High	Master Protein	Q5Z9Z5	Os06g0319800 protein OS=Oryza sativa subsp. japonica GN=Os06g0319800 PE=4 SV=1	0	11.8833	10.2326	2	4	2	1	215	23.362	10.04	High	High	High	High	High	High	High	High	High	Phospho [S55(100); S598(100); S601(100); S947(100)]	1	1.00689	0.985147	1.02421	0.993244	1.01541	1.58244	1.43299	1.63825	3	3	3	3	3	3	3	3	3	0.19	0	15.5013	3
FALSE	High	Master Protein	C7J464	Os06g0291800 protein OS=Oryza sativa subsp. japonica GN=Os06g0291800 PE=4 SV=1	0	11.8677	3.80195	3	6	3	1	1131	125.845	8.84	High	High	High	High	High	High	High	High	High	Phospho [S508(100)]	1	1.00892	0.980379	0.897158	1.01436	0.945045	1.22163	1.26875	1.19069	2	2	2	2	2	2	2	2	2	0.501	0	41.2115	1
FALSE	High	Master Protein	Q6EQ14	Os09g0416200 protein OS=Oryza sativa subsp. japonica GN=Os09g0416200 PE=2 SV=1	0	11.8512	2.93542	1	14	1	1	511	55.248	9.03	High	High	High	High	High	High	High	High	High	Phospho [S401(100)]	1	1.01196	0.996591	0.929409	0.936947	0.879567	1.27371	1.23994	1.47177	2	2	2	2	2	2	2	2	2	0.16	0	7.67991	1
FALSE	High	Master Protein	Q7XK44	Plant intracellular Ras-group-related LRR protein 3 OS=Oryza sativa subsp. japonica GN=IRL3 PE=2 SV=3	0	11.8463	4.4843	1	2	1	1	446	48.973	4.98	High	High	High	High	High	High	High	High	High	Phospho [S282(100); S285(100)]	1	1.02313	0.973703	2.13344	1.76733	1.7005	1.04454	1.13813	0.968715	2	2	2	2	2	2	2	2	2	0.52	0	20.5629	2
FALSE	High	Master Protein	Q651D5	Probable aquaporin PIP2-7 OS=Oryza sativa subsp. japonica GN=PIP2-7 PE=2 SV=2	0	11.8356	9.65517	2	6	2	1	290	30.297	8.95	High	High	High	High	High	High	High	High	High	Phospho [S255(100)]	1	1.09519	0.951768	1.13073	0.871602	0.875657	0.936583	0.844232	0.967508	2	2	2	2	2	2	2	2	2	0.259	0	12.9494	2
FALSE	High	Master Protein	Q7F9Y6	OSJNBa0086O06.22 protein OS=Oryza sativa subsp. japonica GN=Os04g0591000 PE=2 SV=1	0	11.8172	10.3093	2	4	2	1	291	31.653	6.47	High	High	High	High	High	High	High	High	High	Phospho [S442(99.4); S642(100)]	1	1.0688	0.971796	1.07209	1.0234	1.16689	1.42429	1.33406	1.5538	2	2	2	2	2	2	2	2	2	0.099	0	12.2035	2
FALSE	High	Master Protein	Q7XVN8	OSJNBa0023J03.10 protein OS=Oryza sativa subsp. japonica GN=Os04g0306800 PE=2 SV=2	0	11.7646	5.23883	2	5	2	1	649	71.982	8.92	High	High	High	High	High	High	High	High	High	Phospho [S50(100)]	1	1.06271	0.914575	0.911817	0.830384	0.832656	1.10704	1.05169	1.15208	4	4	4	4	4	4	4	4	4	0.374	0	19.7605	3
FALSE	High	Master Protein	A0A0P0Y1Y5	Adenosylhomocysteinase (Fragment) OS=Oryza sativa subsp. japonica GN=Os11g0455500 PE=3 SV=1	0	11.6938	4.46602	3	8	3	1	515	56.734	7.2	High	High	High	High	High	High	High	High	High	Phospho [S146(100); S164(100)]	1	1.05155	0.814439	0.893249	0.811283	0.77695	0.958364	0.952763	0.972334	2	2	2	2	2	2	2	2	2	0.334	0	13.32	2
FALSE	High	Master Protein	Q6Z653	Os02g0722500 protein OS=Oryza sativa subsp. japonica GN=Os02g0722500 PE=2 SV=1	0	11.6927	6.62651	2	5	2	1	332	36.82	5.9	High	High	High	High	High	High	High	High	High	Phospho [S144(100); T351(100); S357(100)]	1	0.925685	0.980379	1.01443	0.935942	0.911817	1.15439	1.01807	1.14364	2	2	2	2	2	2	2	2	2	0.103	0	32.7408	2
FALSE	High	Master Protein	Q0IZV2	Os09g0547300 protein OS=Oryza sativa subsp. japonica GN=Os09g0547300 PE=2 SV=1	0	11.691	2.82916	2	9	2	1	919	99.43	5.49	High	High	High	High	High	High	High	High	High	Phospho [S223(100); S224(100)]	1	1.00384	0.782968	0.692903	0.720806	0.857089	0.834307	0.952763	0.939762	2	2	2	2	2	2	2	2	2	0.334	0	12.9701	2
FALSE	High	Master Protein	B7EPQ1	Os01g0909500 protein OS=Oryza sativa subsp. japonica GN=Os01g0909500 PE=2 SV=1	0	11.589	7.62712	2	3	2	1	236	26.391	4.67	High	High	High	High	High	High	High	High	High	Phospho [S49(100); T52(100); S92(100)]	1	1.03429	0.948907	1.01052	1.01838	0.867839	1.26425	1.28988	1.33666	2	2	2	2	2	2	2	2	2	0.369	0	21.0074	2
FALSE	High	Master Protein	Q10E16	Os03g0711300 protein OS=Oryza sativa subsp. japonica GN=LOC_Os03g50330 PE=3 SV=1	0	11.5887	8.68545	2	10	2	1	426	47.864	5.16	High	High	High	High	High	High	High	High	High	Phospho [S194(100)]	1	1.08403	1.00041	1.05743	0.990228	0.91084	0.963099	1.05649	1.13399	1	1	1	1	1	1	1	1	1	0.334	0	10.7951	1
FALSE	High	Master Protein	Q6K7A6	Os02g0468200 protein OS=Oryza sativa subsp. japonica GN=Os02g0468200 PE=2 SV=1	0	11.5782	4.33213	1	3	1	1	277	30.945	10.02	High	High	High	High	High	High	High	High	High	Phospho [S125(100)]	1	1.12158	1.00327	1.0633	0.96208	0.942114	1.14492	1.05937	1.22205	2	2	2	2	2	2	2	2	2	0.389	0	33.2345	2
FALSE	High	Master Protein	A0A0N7KI17	Os03g0747600 protein (Fragment) OS=Oryza sativa subsp. japonica GN=Os03g0747600 PE=4 SV=1	0	11.4598	4.72103	2	27	2	1	466	50.592	6.93	High	High	High	High	High	High	High	High	High	Phospho [S327(99.3)]	1	0.87189	0.91076	0.950909	0.930915	1.08382	1.05212	1.03632	1.12192	2	2	2	2	2	2	2	2	2	0.15	0	22.669	2
FALSE	High	Master Protein	Q0J1Z3	Os09g0400500 protein OS=Oryza sativa subsp. japonica GN=Os09g0400500 PE=2 SV=1	0	11.429	4.01235	2	7	2	1	648	67.8	8.28	High	High	High	High	High	High	High	High	High	Phospho [S343(99.2); T346(100); S358(100)]	1	1.13376	1.01757	1.07209	0.984196	0.961659	1.07958	1.02672	1.11348	2	2	2	2	2	2	2	2	2	0.205	0	22.3365	2
FALSE	High	Master Protein	Q5N7Q7	(Rice Genome Annotation Project) OsWAK10a - OsWAK receptor-like cytoplasmic kinase OS=Oryza sativa subsp. japonica GN=P0034C09.1-2 PE=2 SV=1	0	11.4199	3.01291	2	8	2	1	697	75.263	6.98	High	High	High	High	High	High	High	High	High	Phospho [S300(100)]	1	1.07185	1.0767	1.07209	0.923878	0.926477	1.18091	1.06513	1.32097	2	2	2	2	2	2	2	2	2	0.501	0	31.994	2
FALSE	High	Master Protein	Q0JHK4	Os01g0858500 protein OS=Oryza sativa subsp. japonica GN=Os01g0858500 PE=4 SV=1	0	11.3797	11.2957	2	11	2	1	301	33.645	9.51	High	High	High	High	High	High	High	High	High	Phospho [S273(99.1); S289(100)]	1	0.91655	0.807763	0.796496	0.83139	0.772064	0.789798	0.874967	0.886682	2	2	2	2	2	2	2	2	2	0.334	0	24.5138	2
FALSE	High	Master Protein	Q6K837	Decapping protein 2-like OS=Oryza sativa subsp. japonica GN=Os02g0805900 PE=4 SV=1	0	11.3387	9.28793	2	17	2	1	323	36.578	7.18	High	High	High	High	High	High	High	High	High	Phospho [S126(100); S128(100)]	1	1.1703	1.03855	1.10532	1.05155	0.999774	1.22068	1.18423	1.38732	2	2	2	2	2	2	2	2	2	0.35	0	13.018	2
FALSE	High	Master Protein	A0A0P0W9E9	Os04g0385700 protein (Fragment) OS=Oryza sativa subsp. japonica GN=Os04g0385700 PE=4 SV=1	0	11.2684	8.35655	2	4	2	1	359	39.869	9.22	High	High	High	High	High	High	High	High	High	Phospho [S463(100)]	1	1.02617	1.0128	1.02714	0.97917	1.01737	1.40914	1.34943	1.49952	1	1	1	1	1	1	1	1	1	0.066	0	15.2009	1
FALSE	High	Master Protein	Q6ZBH4	Os08g0545000 protein OS=Oryza sativa subsp. japonica GN=Os08g0545000 PE=2 SV=1	0	11.2237	2.88316	1	3	1	1	659	71.715	7.99	High	High	High	High	High	High	High	High	High	Phospho [S673(100)]	1	0.99775	0.942232	0.987069	0.91282	0.938204	1.2936	1.25146	1.53691	3	3	3	3	3	3	3	3	3	0.212	0	54.522	1
FALSE	High	Master Protein	Q7XVN7	OSJNBa0023J03.11 protein OS=Oryza sativa subsp. japonica GN=Os04g0307200 PE=4 SV=2	0	11.2234	1.61527	1	20	1	1	681	76.201	6.07	High	High	High	High	High	High	High	High	High	Phospho [S425(100)]	1	1.05865	0.923158	1.16005	1.12293	1.15125	1.54835	1.51174	1.6105	1	1	1	1	1	1	1	1	1	0.122	0	14.6247	1
FALSE	High	Master Protein	Q69XZ5	Os06g0472400 protein OS=Oryza sativa subsp. japonica GN=Os06g0472400 PE=4 SV=1	0	11.2144	2.82638	1	6	1	1	743	79.496	5.71	High	High	High	High	High	High	High	High	High	Phospho [S202(100)]	1	1.14899	0.948907	1.20305	0.886682	1.06134	1.33054	1.44451	1.62619	1	1	1	1	1	1	1	1	1	0.425	0	11.8508	1
FALSE	High	Master Protein	Q7F2Z1	PHD finger protein ALFIN-LIKE 6 OS=Oryza sativa subsp. japonica GN=Os01g0887700 PE=2 SV=1	0	11.201	11.3971	1	3	1	1	272	29.585	5.63	High	High	High	High	High	High	High	High	High	Phospho [S35(93.3); S565(99.4)]	1	1.05865	0.995637	1.09262	0.898745	0.959705	1.1828	1.07954	1.13278	2	2	2	2	2	2	2	2	2	0.129	0	12.773	2
FALSE	High	Master Protein	Q5JK43	Os01g0928100 protein OS=Oryza sativa subsp. japonica GN=Os01g0928100 PE=2 SV=1	0	11.1897	6.14035	2	9	2	1	570	62.142	5.82	High	High	High	High	High	High	High	High	High	Phospho [S160(100); S274(100)]	1	1.1226	0.898363	0.886408	0.947	0.718313	1.30307	1.0296	1.3258	2	2	2	2	2	2	2	2	2	0.212	0	6.39702	2
FALSE	High	Master Protein	Q5N7Y5	Os01g0229200 protein OS=Oryza sativa subsp. japonica GN=Os01g0229200 PE=2 SV=1	0	11.1434	6.32911	2	2	2	1	711	76.905	5.49	High	High	High	High	High	High	High	High	High	Phospho [S52(100)]	1	1.07489	1.11389	1.11607	1.21039	1.08089	1.10041	1.14293	1.06522	2	2	2	2	2	2	2	2	2	2.981	0	19.731	2
FALSE	High	Master Protein	Q6ZBV1	Os08g0200300 protein OS=Oryza sativa subsp. japonica GN=Os08g0200300 PE=2 SV=1	0	11.1111	21.5385	2	7	2	1	130	13.218	9.23	High	High	High	High	High	High	High	High	High	Phospho [T745(100); S754(99.1); S758(99.1)]	1	0.93888	1.0252	1.05548	1.11288	0.989024	1.22258	1.24474	1.1738	2	2	2	2	2	2	2	2	2	0.108	0	26.8481	2
FALSE	High	Master Protein	Q5TKG1	Os05g0594700 protein OS=Oryza sativa subsp. japonica GN=Os05g0594700 PE=2 SV=1	0	11.0918	3.13316	2	8	2	1	766	87.87	8.78	High	High	High	High	High	High	High	High	High	Phospho [S47(100)]	1	1.07185	0.973703	1.05939	1.02944	0.92159	1.04928	1.01327	1.13881	2	2	2	2	2	2	2	2	2	0.334	0	39.0497	1
FALSE	High	Master Protein	Q2QW44	Zinc-finger homeodomain protein 3 OS=Oryza sativa subsp. japonica GN=ZHD3 PE=3 SV=3	0	11.0793	4.55927	1	11	1	1	329	34.929	8.44	High	High	High	High	High	High	High	High	High	Phospho [S171(100)]	1	0.89625	0.971796	1.21771	1.08674	1.13269	1.40251	1.25434	1.58034	3	3	3	3	3	3	3	3	3	0.413	0	20.9153	2
FALSE	High	Master Protein	A0A0P0XX67	Os10g0556200 protein OS=Oryza sativa subsp. japonica GN=Os10g0556200 PE=4 SV=1	0	11.0451	6.23656	2	8	2	1	465	48.808	6.79	High	High	High	High	High	High	High	High	High	Phospho [S79(99.4)]	1	1.17233	0.996591	0.945045	0.972133	0.924522	1.08431	1.30044	1.10383	2	2	2	2	2	2	2	2	2	0.099	0	11.1502	1
FALSE	High	Master Protein	O04226	Delta-1-pyrroline-5-carboxylate synthase OS=Oryza sativa subsp. japonica GN=P5CS PE=2 SV=2	0	11.0433	2.65363	1	6	1	1	716	77.697	6.84	High	High	High	High	High	High	High	High	High	Phospho [S428(100); S430(99.3)]	1	1.0282	1.10531	1.28221	1.17923	1.19132	1.16481	1.2918	1.07488	2	2	2	2	2	2	2	2	2	0.304	0	28.9102	2
FALSE	High	Master Protein	A0A0P0V3J7	Os01g0532200 protein (Fragment) OS=Oryza sativa subsp. japonica GN=Os01g0532200 PE=4 SV=1	0	11.0375	2.78373	2	15	2	1	467	56.298	6.54	High	High	High	High	High	High	High	High	High	Phospho [S201(99.5)]	1	1.16421	1.12057	1.02518	1.07568	0.927454	1.08431	1.06802	1.13519	2	2	2	2	2	2	2	2	2	0.202	0	18.3073	2
FALSE	High	Master Protein	A0A0P0XW57	Os10g0511900 protein (Fragment) OS=Oryza sativa subsp. japonica GN=Os10g0511900 PE=4 SV=1	0	11.0339	6.35965	2	8	2	1	456	47.839	9.06	High	High	High	High	High	High	High	High	High	Phospho [S1019(100); S1021(100)]	1	0.839409	0.85354	0.899112	1.0224	0.988046	1.09663	1.14773	1.04954	2	2	2	2	2	2	2	2	2	0.068	0	16.4022	2
FALSE	High	Master Protein	Q7X923	FACT complex subunit SPT16 OS=Oryza sativa subsp. japonica GN=SPT16 PE=2 SV=2	0	10.9919	1.79924	2	5	2	1	1056	118.515	5.59	High	High	High	High	High	High	High	High	High	Phospho [S380(100)]	1	1.05256	0.98324	1.03789	1.01134	1.01346	1.16292	1.13525	1.37767	3	3	3	3	3	3	3	3	3	0.194	0	15.9447	3
FALSE	High	Master Protein	Q655S1	ATP-dependent zinc metalloprotease FTSH 2, chloroplastic OS=Oryza sativa subsp. japonica GN=FTSH2 PE=3 SV=1	0	10.9849	4.43787	3	6	3	1	676	72.493	5.72	High	High	High	High	High	High	High	High	High	Phospho [S297(100)]	1	0.964255	0.924112	1.01932	0.885676	0.845361	1.22636	1.09107	1.33183	3	3	3	3	3	3	3	3	3	0.189	0	10.1477	3
FALSE	High	Master Protein	Q2QWJ7	Os12g0193200 protein OS=Oryza sativa subsp. japonica GN=LOC_Os12g09120 PE=2 SV=1	0	10.9743	6.31579	3	4	3	1	665	77.927	7.25	High	High	High	High	High	High	High	High	High	Phospho [S629(100)]	1	1.26774	1.08338	1.17178	1.16917	1.08969	1.25762	1.17367	1.41507	1	1	1	1	1	1	1	1	1	0.062	0	17.2103	1
FALSE	High	Master Protein	A0A0N7KFI2	Os02g0564400 protein OS=Oryza sativa subsp. japonica GN=Os02g0564400 PE=4 SV=1	0	10.9469	3.10078	1	3	1	1	645	68.004	7.31	High	High	High	High	High	High	High	High	High	Phospho [S426(100); S431(100)]	1	1.30631	0.971796	0.881521	0.8334	0.822883	0.917643	0.820221	0.891507	2	2	2	2	2	2	2	2	2	0.116	0	13.5045	2
FALSE	High	Master Protein	A0A0P0VYD4	Os03g0356638 protein OS=Oryza sativa subsp. japonica GN=Os03g0356638 PE=4 SV=1	0	10.9376	1.90476	2	4	2	1	840	92.617	5.15	High	High	High	High	High	High	High	High	High	Phospho [T148(100); T151(100)]	1	1.1703	1.10722	1.04278	0.98118	1.02127	1.21027	1.27451	1.14967	1	1	1	1	1	1	1	1	1	0.071	0	19.3961	1
FALSE	High	Master Protein	Q6AT30	Os05g0559900 protein OS=Oryza sativa subsp. japonica GN=Os05g0559900 PE=2 SV=1	0	10.8542	1.35659	1	6	1	1	1032	114.953	4.82	High	High	High	High	High	High	High	High	High	Phospho [S301(100)]	1	1.51642	1.21975	1.48451	1.38029	1.30371	1.74911	1.61643	1.77095	2	2	2	2	2	2	2	2	2	0.194	0	32.793	1
FALSE	High	Master Protein	Q654V6	Pyruvate dehydrogenase E1 component subunit alpha-2, mitochondrial OS=Oryza sativa subsp. japonica GN=Os06g0246500 PE=2 SV=1	0	10.8382	3.51759	1	9	1	1	398	43.627	8.59	High	High	High	High	High	High	High	High	High	Phospho [S324(100)]	1	1.25658	1.08528	1.19914	1.05658	1.06428	1.32296	1.34366	1.62619	1	1	1	1	1	1	1	1	1	0.259	0	16.4601	1
FALSE	High	Master Protein	Q8S3Q3	Apospory-associated protein C OS=Oryza sativa subsp. japonica GN=24K23.3 PE=2 SV=1	0	10.8216	5.52326	1	18	1	1	344	37.926	5.24	High	High	High	High	High	High	High	High	High	Phospho [T93(100); S100(100); S129(100)]	1	1.0211	0.990869	1.06232	1.01033	0.950909	1.58054	1.43971	1.67565	2	2	2	2	2	2	2	2	2	0.113	0	14.8688	2
FALSE	High	Master Protein	A0A0P0VL78	Os02g0596100 protein (Fragment) OS=Oryza sativa subsp. japonica GN=Os02g0596100 PE=4 SV=1	0	10.8208	6.30915	2	5	2	1	634	71.399	8.16	High	High	High	High	High	High	High	High	High	Phospho [S232(100)]	1	1.05155	1.02711	1.26755	1.15711	1.18937	1.56918	1.39841	1.44161	2	2	2	2	2	2	2	2	2	0.425	0	9.35474	1
FALSE	High	Master Protein	A0A0N7KN54	Os07g0223700 protein OS=Oryza sativa subsp. japonica GN=Os07g0223700 PE=4 SV=1	0	10.8111	5.50162	1	3	1	1	309	34.017	7.81	High	High	High	High	High	High	High	High	High	Phospho [S178(100); S463(100); S516(100)]	1	0.825199	0.759126	0.686062	0.667524	0.762291	0.677105	0.670391	0.803442	3	3	3	3	3	3	3	3	3	0.252	0	38.7305	3
FALSE	High	Master Protein	B7FAA5	Os04g0480100 protein OS=Oryza sativa subsp. japonica GN=Os04g0480100 PE=2 SV=1	0	10.6978	5.82707	3	15	3	1	532	57.448	8.88	High	High	High	High	High	High	High	High	High	Phospho [S427(100)]	1	1.15	1.00613	1.02323	1.06563	1.02323	1.37599	1.26011	1.35717	1	1	1	1	1	1	1	1	1	0.186	0	28.8696	1
FALSE	High	Master Protein	Q6ZIQ1	Os07g0587400 protein OS=Oryza sativa subsp. japonica GN=Os07g0587400 PE=2 SV=1	0	10.6774	3.66133	1	10	1	1	437	49.06	5.6	High	High	High	High	High	High	High	High	High	Phospho [T115(100)]	1	1.12361	0.998498	1.20403	0.886682	0.870771	1.33811	1.21016	1.2124	1	1	1	1	1	1	1	1	1	0.212	0	5.86336	1
FALSE	High	Master Protein	Q40680	Elongation factor 1-delta 1 OS=Oryza sativa subsp. japonica GN=Os07g0614500 PE=2 SV=3	0	10.6388	10.0437	1	1	1	1	229	24.847	4.53	High	High	High	High	High	High	High	High	High	Phospho [S11(100)]	1	0.952075	0.581742	0.976319	0.726838	0.785746	0.870293	0.912424	0.956651	4	4	4	4	4	4	4	4	4	0.487	2	37.5279	4
FALSE	High	Master Protein	Q0E4K1	Catalase isozyme A OS=Oryza sativa subsp. japonica GN=CATA PE=2 SV=1	0	10.6369	6.91057	4	17	2	1	492	56.662	7.01	High	High	High	High	High	High	High	High	High	Phospho [S578(100)]	1	1.08504	0.938417	1.06134	0.925889	0.898135	1.23205	1.14485	1.21843	1	1	1	1	1	1	1	1	1	0.233	0	9.517	1
FALSE	High	Master Protein	Q9LWT7	Os06g0113900 protein OS=Oryza sativa subsp. japonica GN=P0541H01.18-1 PE=2 SV=1	0	10.6245	2.39316	1	3	1	1	585	62.747	9.23	High	High	High	High	High	High	High	High	High	Phospho [S50(100)]	1	1.1023	0.938417	0.961659	1.05959	1.09555	1.33716	1.04881	1.0797	1	1	1	1	1	1	1	1	1	0.11	0	6.0762	1
FALSE	High	Master Protein	Q5QLE2	Os01g0681000 protein OS=Oryza sativa subsp. japonica GN=Os01g0681000 PE=2 SV=1	0	10.6019	3.9548	1	1	1	1	531	58.173	7.23	High	High	High	High	High	High	High	High	High	Phospho [S730(99.1)]	1	1.15305	1.00231	1.03007	1.04753	1.03691	1.26993	1.28796	1.57069	2	2	2	2	2	2	2	2	2	0.113	0	10.5092	1
FALSE	High	Master Protein	Q2QNB5	Os12g0571900 protein OS=Oryza sativa subsp. japonica GN=Os12g0571900 PE=2 SV=1	0	10.5728	3.69357	1	6	1	1	731	82.712	8.24	High	High	High	High	High	High	High	High	High	Phospho [S93(100)]	1	1.2241	1.09291	0.842429	0.921867	0.769132	1.12314	1.4157	1.03989	1	1	1	1	1	1	1	1	1	0.11	0	6.2286	1
FALSE	High	Master Protein	Q6YUA1	Os02g0100300 protein OS=Oryza sativa subsp. japonica GN=Os02g0100300 PE=4 SV=1	0	10.5361	8.57843	1	1	1	1	408	44.123	5.12	High	High	High	High	High	High	High	High	High	Phospho [S306(100)]	1	1.21496	1.05667	1.07405	1.0787	1.02812	1.21784	1.21689	1.2498	2	2	2	2	2	2	2	2	2	0.778	0	14.7252	1
FALSE	High	Master Protein	Q6YZK2	Os08g0359200 protein OS=Oryza sativa subsp. japonica GN=P0488B06.38-1 PE=4 SV=1	0	10.5342	4.19355	1	8	1	1	310	34.705	7.2	High	High	High	High	High	High	High	High	High	Phospho [S60(100); S63(98.6); S733(98.7); S739(100)]	1	1.11448	1.01662	1.22553	1.09981	1.18351	1.74816	1.5588	1.93381	3	3	3	3	3	3	3	3	3	0.225	0	8.11756	2
FALSE	High	Master Protein	Q7XPL3	Probable potassium transporter 15 OS=Oryza sativa subsp. japonica GN=HAK15 PE=2 SV=2	0	10.5112	6.22837	2	4	2	1	867	95.394	5.68	High	High	High	High	High	High	High	High	High	Phospho [S557(100)]	1	1.06779	1.02329	1.24117	0.873613	1.05157	1.02371	0.975813	0.862554	1	1	1	1	1	1	1	1	1	0.075	0	5.80456	1
FALSE	High	Master Protein	Q7F8Y1	Polyadenylate-binding protein OS=Oryza sativa subsp. japonica GN=Os04g0504800 PE=2 SV=1	0	10.4839	3.79363	1	1	1	1	659	71.186	8.85	High	High	High	High	High	High	High	High	High	Phospho [S346(100)]	1	1.06068	1.07193	1.1063	0.952027	0.888362	1.04833	1.04881	1.05195	2	2	2	2	2	2	2	2	2	0.134	0	19.8587	1
FALSE	High	Master Protein	Q6KA01	Os02g0822500 protein OS=Oryza sativa subsp. japonica GN=OJ1119_A01.22-1 PE=2 SV=1	0	10.4307	1.69903	1	7	1	1	824	93.644	8.78	High	High	High	High	High	High	High	High	High	Phospho [S777(100); S806(99.8)]	1	1.13579	1.07193	1.04082	0.890703	0.976319	0.968781	0.941237	1.07126	4	4	4	4	4	4	4	4	4	0.147	0	54.2243	2
FALSE	High	Master Protein	Q0J716	Os08g0240800 protein OS=Oryza sativa subsp. japonica GN=Os08g0240800 PE=4 SV=1	0	10.4137	1.88482	2	22	2	1	955	107.276	6	High	High	High	High	High	High	High	High	High	Phospho [S670(100); S691(100)]	1	1.23019	0.679017	0.951886	0.926894	0.687039	0.912908	0.835588	0.984397	2	2	2	2	2	2	2	2	2	0.11	0	13.8332	2
FALSE	High	Master Protein	Q0DM51	DEAD-box ATP-dependent RNA helicase 3, chloroplastic OS=Oryza sativa subsp. japonica GN=Os03g0827700 PE=2 SV=2	0	10.4112	3.29815	2	4	2	1	758	81.566	6.52	High	High	High	High	High	High	High	High	High	Phospho [S427(100)]	1	1.13782	0.926019	1.05841	0.970122	0.851225	1.31349	1.29372	1.36561	1	1	1	1	1	1	1	1	1	0.186	0	17.5239	1
FALSE	High	Master Protein	Q75I90	Eukaryotic peptide chain release factor subunit 1-2, putative, expressed OS=Oryza sativa subsp. japonica GN=OSJNBa0004L11.18 PE=2 SV=1	0	10.3115	3.66133	1	6	1	1	437	48.967	5.52	High	High	High	High	High	High	High	High	High	Phospho [S30(100)]	1	0.968315	0.951768	1.01346	0.948005	0.923545	1.25004	1.19864	1.43075	1	1	1	1	1	1	1	1	1	1.512	0	9.28626	1
FALSE	High	Master Protein	Q69SU7	Os02g0553600 protein OS=Oryza sativa subsp. japonica GN=Os02g0553600 PE=2 SV=1	0	10.2973	21.7822	1	5	1	1	101	11.271	9.7	High	High	High	High	High	High	High	High	High	Phospho [S91(100)]	1	1.10128	1.03378	1.06818	1.02944	0.988046	1.11651	1.22553	1.12192	1	1	1	1	1	1	1	1	1	0.125	0	7.37888	1
FALSE	High	Master Protein	Q10CU2	Os03g0749800 protein OS=Oryza sativa subsp. japonica GN=Os03g0749800 PE=2 SV=1	0	10.2632	3.24484	1	2	1	1	678	76.487	7.8	High	High	High	High	High	High	High	High	High	Phospho [S628(100)]	1	1.18857	0.85354	1.13073	1.00832	0.950909	1.39493	1.33502	1.42834	2	2	2	2	2	2	2	2	2	0.119	0	10.4422	2
FALSE	High	Master Protein	Q2QXY9	2-isopropylmalate synthase B, putative, expressed OS=Oryza sativa subsp. japonica GN=Os12g0138900 PE=3 SV=2	0	10.2078	4.40945	2	4	2	1	635	68.418	6.93	High	High	High	High	High	High	High	High	High	Phospho [S682(99.3)]	1	1.11143	1.24359	1.06818	1.00229	1.0203	1.07863	0.897057	1.08573	1	1	1	1	1	1	1	1	1	0.094	0	10.9022	1
FALSE	High	Master Protein	Q0IZX5	Phospholipase D OS=Oryza sativa subsp. japonica GN=Os09g0543100 PE=2 SV=1	0	10.1943	1.75644	1	3	1	1	854	96.4	7.2	High	High	High	High	High	High	High	High	High	Phospho [T695(99.1)]	1	1.29819	1.30367	1.21478	1.07668	1.07307	1.05969	1.0296	1.11348	2	2	2	2	2	2	2	2	2	0.174	0	7.83952	2
FALSE	High	Master Protein	Q2QV45	70 kDa heat shock protein OS=Oryza sativa subsp. japonica GN=Os12g0244100 PE=2 SV=1	0	10.1837	3.4384	2	5	2	1	698	74.041	5.25	High	High	High	High	High	High	High	High	High	Phospho [T169(100)]	1	1.12057	0.953676	1.12389	0.840437	0.975342	1.02276	1.20728	1.24739	1	1	1	1	1	1	1	1	1	0.122	0	4.96531	1
FALSE	High	Master Protein	Q6K4P1	Eukaryotic translation initiation factor 3 subunit G OS=Oryza sativa subsp. japonica GN=Os02g0788400 PE=2 SV=1	0	10.1685	9.34256	1	1	1	1	289	31.989	8.5	High	High	High	High	High	High	High	High	High	Phospho [S188(100)]	1	1.17132	1.04809	1.06623	0.885676	0.98316	1.13829	1.04016	0.930111	1	1	1	1	1	1	1	1	1	0.089	0	12.3612	1
FALSE	High	Master Protein	Q10M12	Expressed protein OS=Oryza sativa subsp. japonica GN=Os03g0327600 PE=2 SV=1	0	10.1319	5.17241	1	3	1	1	348	38.798	6.8	High	High	High	High	High	High	High	High	High	Phospho [S150(100); S155(100)]	1	1.10839	1.01471	1.02714	0.873613	0.742745	0.92806	0.90474	0.995255	1	1	1	1	1	1	1	1	1	0.087	0	16.6598	1
FALSE	High	Master Protein	Q9SDG8	Protein argonaute 4A OS=Oryza sativa subsp. japonica GN=AGO4A PE=2 SV=1	0	10.1256	1.88053	1	5	1	1	904	100.576	8.97	High	High	High	High	High	High	High	High	High	Phospho [S121(99.9); S134(98.3)]	1	1.20887	0.967027	1.18546	0.892713	1.03593	1.14019	1.22169	1.34751	1	1	1	1	1	1	1	1	1	0.212	0	5.51364	1
FALSE	High	Master Protein	Q7XVJ5	OJ000126_13.10 protein OS=Oryza sativa subsp. japonica GN=OJ000126_13.10 PE=4 SV=2	0	10.0857	11.4286	1	1	1	1	245	25.226	9.95	High	High	High	High	High	High	High	High	High	Phospho [S35(100)]	1	0.99369	0.978471	0.881521	0.895729	0.954818	0.982039	0.988299	1.03145	2	2	2	2	2	2	2	2	2	0.413	0	31.996	2
FALSE	High	Master Protein	Q6L561	Os05g0589600 protein OS=Oryza sativa subsp. japonica GN=Os05g0589600 PE=4 SV=1	0	10.0211	5.22193	2	11	2	1	383	41.004	6.06	High	High	High	High	High	High	High	High	High	Phospho [S287(99.2)]	1	0.98557	0.913621	0.952864	0.918851	0.912795	1.1222	1.13237	1.25101	1	1	1	1	1	1	1	1	1	0.245	0	10.5221	1
FALSE	High	Master Protein	Q6L4S3	Os05g0591900 protein OS=Oryza sativa subsp. japonica GN=Os05g0591900 PE=2 SV=1	0	10.0148	4.51389	1	4	1	1	288	31.601	6.42	High	High	High	High	High	High	High	High	High	Phospho [S357(100)]	1	1.07591	1.04332	1.18253	1.00229	0.879567	1.28034	1.15446	1.24497	1	1	1	1	1	1	1	1	1	0.212	0	6.9308	1
FALSE	High	Master Protein	A0A0N7KQK8	Os09g0327500 protein OS=Oryza sativa subsp. japonica GN=Os09g0327500 PE=4 SV=1	0	9.998	4.04762	1	2	1	1	420	43.768	9.7	High	High	High	High	High	High	High	High	High	Phospho [S42(100)]	1	0.974405	0.945093	1.02812	0.899751	1.03202	1.24909	1.19672	1.40904	1	1	1	1	1	1	1	1	1	0.292	0	10.9709	1
FALSE	High	Master Protein	Q688Y5	Os05g0560600 protein OS=Oryza sativa subsp. japonica GN=Os05g0560600 PE=2 SV=1	0	9.99282	4.04624	1	5	1	1	346	37.421	9.92	High	High	High	High	High	High	High	High	High	Phospho [S225(100)]	1	0.761254	0.62275	0.558036	0.654455	0.664561	0.658165	0.853837	1.11951	2	2	2	2	2	2	2	2	2	0.194	0	17.0696	2
FALSE	High	Master Protein	Q6YTU8	Os07g0571900 protein OS=Oryza sativa subsp. japonica GN=Os07g0571900 PE=2 SV=1	0	9.99158	8.21918	2	6	2	1	438	48.777	7.36	High	High	High	High	High	High	High	High	High	Phospho [S1466(100)]	1	1.40172	1.19782	1.27537	1.18626	1.18448	1.44891	1.3331	1.26066	1	1	1	1	1	1	1	1	1	0.046	0	7.14953	1
FALSE	High	Master Protein	A0A0P0VC44	Os01g0916800 protein OS=Oryza sativa subsp. japonica GN=Os01g0916800 PE=4 SV=1	0	9.99114	1.31974	1	2	1	1	1667	189.937	7.17	High	High	High	High	High	High	High	High	High	Phospho [S69(100)]	1	1.13173	0.873567	0.977296	1.03547	0.998797	1.14303	1.04593	1.33545	1	1	1	1	1	1	1	1	1	0.053	0	8.31153	1
FALSE	High	Master Protein	Q0DJF1	Os05g0294600 protein OS=Oryza sativa subsp. japonica GN=Os05g0294600 PE=2 SV=1	0	9.99097	2.64201	1	2	1	1	757	84.955	6.28	High	High	High	High	High	High	High	High	High	Phospho [S216(100); S228(99.4); S419(100)]	1	1.00892	0.992776	1.12975	1.06462	1.00759	1.08716	1.16694	1.05678	3	3	3	3	3	3	3	3	3	0.425	0	55.3055	3
FALSE	High	Master Protein	A0A0N7KSC9	Os11g0123400 protein OS=Oryza sativa subsp. japonica GN=Os11g0123400 PE=4 SV=1	0	9.98398	6.13208	3	18	3	1	424	47.071	8.43	High	High	High	High	High	High	High	High	High	Phospho [S182(100)]	1	0.96527	0.937463	1.11119	1.06965	1.20794	1.10041	1.02864	1.26789	1	1	1	1	1	1	1	1	1	0.145	0	27.0765	1
FALSE	High	Master Protein	A0A0N7KP48	Os08g0103000 protein (Fragment) OS=Oryza sativa subsp. japonica GN=Os08g0103000 PE=4 SV=1	0	9.98005	6.74157	1	7	1	1	267	29.973	6.73	High	High	High	High	High	High	High	High	High	Phospho [S199(100)]	1	1.12057	1.1425	1.02714	1.00229	1.03691	1.44891	1.45508	1.58638	1	1	1	1	1	1	1	1	1	0.389	0	17.4831	1
FALSE	High	Master Protein	Q7XI22	Os07g0186400 protein OS=Oryza sativa subsp. japonica GN=Os07g0186400 PE=4 SV=1	0	9.96919	6.88073	1	5	1	1	218	24.906	8	High	High	High	High	High	High	High	High	High	Phospho [S6(100); S8(100); S53(100); S57(98.8); S63(100); S65(100); S67(100); S86(100); S88(100); T90(97.5)]	1	1.1023	0.97561	0.982183	0.926894	0.851225	1.01234	0.971972	0.980778	4	4	4	4	4	4	4	4	4	9	0	33.8815	4
FALSE	High	Master Protein	A0A0P0Y379	Os11g0544200 protein (Fragment) OS=Oryza sativa subsp. japonica GN=Os11g0544200 PE=4 SV=1	0	9.9174	32.2034	4	18	4	1	118	13.89	12.37	High	High	High	High	High	High	High	High	High	Phospho [S689(99.1)]	1	1.08504	0.951768	0.982183	0.93192	0.847316	1.02276	0.98926	1.09659	2	2	2	2	2	2	2	2	2	0.103	0	10.1746	1
FALSE	High	Master Protein	Q5QLD9	V-type proton ATPase subunit a OS=Oryza sativa subsp. japonica GN=P0460C04.33-1 PE=2 SV=1	0	9.90484	2.07824	1	3	1	1	818	92.98	6.47	High	High	High	High	High	High	High	High	High	Phospho [T598(100)]	1	1.06982	1.09291	1.10728	1.10383	1.05157	1.21784	1.11796	1.22929	2	2	2	2	2	2	2	2	2	0.108	0	25.3399	1
FALSE	High	Master Protein	A0A0P0WIK5	Os05g0162200 protein OS=Oryza sativa subsp. japonica GN=Os05g0162200 PE=4 SV=1	0	9.89805	2.28659	1	7	1	1	656	74.19	4.96	High	High	High	High	High	High	High	High	High	Phospho [S325(100); S329(98.9); S337(100)]	1	1.1297	0.959398	1.09262	0.942979	0.912795	1.15629	1.16118	1.23774	2	2	2	2	2	2	2	2	2	0.304	0	34.0036	2
FALSE	High	Master Protein	Q10NQ3	Os03g0262900 protein OS=Oryza sativa subsp. japonica GN=Os03g0262900 PE=4 SV=1	0	9.87488	4.375	2	11	2	1	480	53.808	4.78	High	High	High	High	High	High	High	High	High	Phospho [S392(100)]	1	1.11854	0.812532	0.675312	0.622286	0.5854	0.643013	0.595477	0.591121	1	1	1	1	1	1	1	1	1	0.194	0	30.1485	1
FALSE	High	Master Protein	Q5QNI2	Os01g0212400 protein OS=Oryza sativa subsp. japonica GN=Os01g0212400 PE=2 SV=1	0	9.85694	1.88356	1	8	1	1	584	63.281	6.34	High	High	High	High	High	High	High	High	High	Phospho [S811(100)]	1	1.07591	0.972749	1.1796	1.16616	1.01639	1.19322	1.20824	1.2305	2	2	2	2	2	2	2	2	2	0.081	0	5.11073	2
FALSE	High	Master Protein	Q75LI9	AIG1 family protein, expressed OS=Oryza sativa subsp. japonica GN=Os03g0835100 PE=4 SV=1	0	9.83016	2.81924	2	2	2	1	1206	131.056	4.74	High	High	High	High	High	High	High	High	High	Phospho [S226(100)]	1	0.858695	1.02139	0.696812	0.821337	0.947977	0.745289	0.992141	0.924079	1	1	1	1	1	1	1	1	1	0.072	0	4.90562	1
FALSE	High	Master Protein	Q5QM91	Os01g0679000 protein OS=Oryza sativa subsp. japonica GN=B1144G04.33-1 PE=2 SV=1	0	9.82536	3.75494	1	1	1	1	506	57.492	7.15	High	High	High	High	High	High	High	High	High	Phospho [S136(100)]	1	1.06779	1.31607	1.40144	0.984196	1.22553	1.78036	1.60779	1.98206	1	1	1	1	1	1	1	1	1	0.077	0	5.85366	1
FALSE	High	Master Protein	Q53PP7	Expressed protein OS=Oryza sativa subsp. japonica GN=LOC_Os11g06410 PE=2 SV=1	0	9.79156	3.93375	1	1	1	1	483	55.028	6.73	High	High	High	High	High	High	High	High	High	Phospho [S25(100); S124(99.5)]	1	0.984555	1.05858	0.946023	0.977159	0.911817	1.18091	1.05169	1.45368	1	1	1	1	1	1	1	1	1	1.154	0	10.8511	2
FALSE	High	Master Protein	B7EPB8	Os11g0160500 protein OS=Oryza sativa subsp. japonica GN=Os11g0160500 PE=2 SV=1	0	9.78149	12.7119	2	5	1	1	236	24.556	7.5	High	High	High	High	High	High	High	High	High	Phospho [S262(100); S339(100); S342(100)]	1	1.08403	0.97561	1.06232	0.945995	0.864907	1.28792	1.14965	1.27996	3	3	3	3	3	3	3	3	3	0.468	0	18.5025	3
FALSE	High	Master Protein	Q5ZAN2	Os01g0766600 protein OS=Oryza sativa subsp. japonica GN=Os01g0766600 PE=2 SV=1	0	9.77295	10.5793	3	9	3	1	397	42.451	4.39	High	High	High	High	High	High	High	High	High	Phospho [T47(100)]	1	1.03632	0.99373	1.1581	1.0415	0.93625	1.1203	1.03152	1.15329	3	3	3	3	3	3	3	3	3	2.162	0	10.0314	2
FALSE	High	Master Protein	Q69WH2	Os06g0332800 protein OS=Oryza sativa subsp. japonica GN=Os06g0332800 PE=2 SV=1	0	9.74504	22.9008	2	4	2	1	131	13.613	8.32	High	High	High	High	High	High	High	High	High	Phospho [S635(100); S639(100)]	1	1.15	0.989915	0.969478	0.871602	0.844384	1.23773	1.19095	1.27031	2	2	2	2	2	2	2	2	2	0.113	0	10.0599	1
FALSE	High	Master Protein	Q65WY8	FACT complex subunit SSRP1-B OS=Oryza sativa subsp. japonica GN=SSRP1-B PE=2 SV=1	0	9.7099	2.1875	1	3	1	1	640	71.005	6.04	High	High	High	High	High	High	High	High	High	Phospho [S166(100)]	1	0.95715	0.91839	0.816042	0.927899	0.871748	1.10988	1.16598	1.22688	2	2	2	2	2	2	2	2	2	0.126	0	14.6505	2
FALSE	High	Master Protein	Q0J035	Pantothenate kinase 2 OS=Oryza sativa subsp. japonica GN=Os09g0533100 PE=2 SV=2	0	9.67071	3.31858	2	8	2	1	904	98.888	6.33	High	High	High	High	High	High	High	High	High	Phospho [S709(100)]	1	1.08098	1.194	1.14441	0.921867	1.05841	1.23015	1.23898	1.43799	1	1	1	1	1	1	1	1	1	0.126	0	8.82423	1
FALSE	High	Master Protein	A0A0P0WJ34	Os05g0207900 protein (Fragment) OS=Oryza sativa subsp. japonica GN=Os05g0207900 PE=4 SV=1	0	9.66573	1.06178	1	4	1	1	1036	115.854	4.7	High	High	High	High	High	High	High	High	High	Phospho [S432(100)]	1	1.07591	1.00994	0.931363	1.03044	0.843407	1.08526	0.947	0.991636	1	1	1	1	1	1	1	1	1	0.11	0	9.04119	1
FALSE	High	Master Protein	Q5NAI4	Phospholipase A1-II 5 OS=Oryza sativa subsp. japonica GN=Os01g0710700 PE=2 SV=1	0	9.64397	3.44086	1	2	1	1	465	50.422	6.98	High	High	High	High	High	High	High	High	High	Phospho [T956(100)]	1	1.04038	1.06621	1.09457	0.993244	1.01541	1.01802	0.92491	1.17621	1	1	1	1	1	1	1	1	1	0.093	0	33.0583	1
FALSE	High	Master Protein	Q8L6I2	Plasma membrane ATPase OS=Oryza sativa subsp. japonica GN=a2 PE=3 SV=1	0	9.62179	1.35841	1	11	1	1	957	105.374	6.79	High	High	High	High	High	High	High	High	High	Phospho [S23(100); S406(99.4)]	1	1.13275	1.02043	1.06916	0.905782	0.962637	1.05685	1.05457	1.09418	3	3	3	3	3	3	3	3	3	1.512	0	11.4622	2
FALSE	High	Master Protein	Q5Z9H6	WAT1-related protein OS=Oryza sativa subsp. japonica GN=P0655A07.7-1 PE=2 SV=1	0	9.60359	6.05327	2	7	2	1	413	44.215	7.99	High	High	High	High	High	High	High	High	High	Phospho [S199(100)]	1	1.16015	1.05572	0.880544	0.986207	0.934295	1.22731	1.22361	1.35717	1	1	1	1	1	1	1	1	1	0.166	0	13.8989	1
FALSE	High	Master Protein	C7J7X6	Os10g0455900 protein OS=Oryza sativa subsp. japonica GN=Os10g0455900 PE=4 SV=1	0	9.60119	5.71429	1	4	1	1	315	36.691	7.17	High	High	High	High	High	High	High	High	High	Phospho [S377(99.6)]	1	0.96324	1.04332	0.992933	1.06864	0.960682	1.32769	1.18519	1.48625	1	1	1	1	1	1	1	1	1	0.062	0	13.9396	1
FALSE	High	Master Protein	A0A0P0VV16	Os03g0218300 protein (Fragment) OS=Oryza sativa subsp. japonica GN=Os03g0218300 PE=4 SV=1	0	9.58536	3.10458	1	4	1	1	612	65.304	5.3	High	High	High	High	High	High	High	High	High	Phospho [S43(100); S50(99.2); S51(100)]	1	1.11346	1.06716	1.02323	0.873613	0.985115	1.14682	1.10067	1.25704	1	1	1	1	1	1	1	1	1	0.292	0	6.11373	1
FALSE	High	Master Protein	Q688W0	Os05g0567800 protein OS=Oryza sativa subsp. japonica GN=Os05g0567800 PE=2 SV=1	0	9.51433	3.19361	1	2	1	1	501	53.765	8.51	High	High	High	High	High	High	High	High	High	Phospho [S101(100)]	1	1.00892	0.834466	1.06037	1.01033	0.84927	1.07958	0.957565	0.950619	3	3	3	3	3	3	3	3	3	2.594	0	18.3988	3
FALSE	High	Master Protein	Q8S9Z3	Os01g0969000 protein OS=Oryza sativa subsp. japonica GN=Os01g0969000 PE=2 SV=1	0	9.51159	14.1509	3	15	3	1	106	11.777	4.94	High	High	High	High	High	High	High	High	High	Phospho [S22(100)]	1	1.28398	1.0252	1.08187	0.97917	0.919636	1.32201	1.23321	1.44523	1	1	1	1	1	1	1	1	1	0.122	0	11.4488	1
FALSE	High	Master Protein	Q6H798	Acetyl-coenzyme A synthetase OS=Oryza sativa subsp. japonica GN=Os02g0525900 PE=2 SV=1	0	9.4901	1.98582	1	4	1	1	705	77.543	6.01	High	High	High	High	High	High	High	High	High	Phospho [S739(99.2)]	1	1.22207	1.09291	0.959705	0.774087	0.792587	1.11462	1.2457	1.44161	1	1	1	1	1	1	1	1	1	0.035	0	21.1997	1
FALSE	High	Master Protein	Q10P54	Expressed protein OS=Oryza sativa subsp. japonica GN=LOC_Os03g14250 PE=4 SV=1	0	9.47925	1.73077	1	12	1	1	1040	115.845	5.1	High	High	High	High	High	High	High	High	High	Phospho [S539(100)]	1	1.07895	0.97561	0.990978	0.819326	1.02225	1.25099	1.19768	1.34148	1	1	1	1	1	1	1	1	1	0.061	0	8.91716	1
FALSE	High	Master Protein	Q7XQR9	Double-strand break repair protein MRE11 OS=Oryza sativa subsp. japonica GN=MRE11 PE=1 SV=2	0	9.42724	2.55319	1	2	1	1	705	79.077	6.38	High	High	High	High	High	High	High	High	High	Phospho [S437(100)]	1	1.09519	1.0376	1.02812	1.02944	0.86393	1.38262	1.10067	1.44402	2	2	2	2	2	2	2	2	2	0.269	0	13.5716	2
FALSE	High	Master Protein	Q656E2	Endoribonuclease E-like protein OS=Oryza sativa subsp. japonica GN=P0552C05.41-1 PE=4 SV=1	0	9.42208	4.04494	2	6	2	1	445	50.807	6.34	High	High	High	High	High	High	High	High	High	Phospho [S192(100)]	1	1.11143	0.906946	1.10337	0.943984	1.03691	1.03696	1.12468	1.31615	1	1	1	1	1	1	1	1	1	0.233	0	32.3255	2
FALSE	High	Master Protein	Q0JPG8	Os01g0223600 protein (Fragment) OS=Oryza sativa subsp. japonica GN=Os01g0223600 PE=4 SV=1	0	9.34903	4.6748	2	13	1	1	492	52.922	8.22	High	High	High	High	High	High	High	High	High	Phospho [S72(100)]	1	1.26165	1.02616	0.706585	0.55493	0.539467	0.472553	0.412992	0.50185	2	2	2	2	2	2	2	2	2	1.154	0	22.5245	1
FALSE	High	Master Protein	Q0DL73	Os05g0119700 protein (Fragment) OS=Oryza sativa subsp. japonica GN=Os05g0119700 PE=4 SV=1	0	9.32682	13	1	11	1	1	100	11.435	7.43	High	High	High	High	High	High	High	High	High	Phospho [S200(100); S232(100)]	1	1.09012	1.01853	1.03007	0.997265	0.92159	1.10988	1.01903	1.15088	2	2	2	2	2	2	2	2	2	0.16	0	28.0134	2
FALSE	High	Master Protein	Q0DVG7	Os03g0130800 protein (Fragment) OS=Oryza sativa subsp. japonica GN=Os03g0130800 PE=4 SV=1	0	9.3029	4.03877	2	8	2	1	619	67.565	7.75	High	High	High	High	High	High	High	High	High	Phospho [S52(100)]	1	0.868845	0.822068	0.823861	0.808268	0.758382	1.06159	1.02672	1.05557	1	1	1	1	1	1	1	1	1	1.154	0	10.2973	1
FALSE	High	Master Protein	B9FA98	Os03g0102000 protein OS=Oryza sativa subsp. japonica GN=Os03g0102000 PE=4 SV=1	0	9.29141	35.0877	1	2	1	1	57	5.894	9.99	High	High	High	High	High	High	High	High	High	Phospho [S25(100); S27(100)]	1	0.950045	1.00231	0.932341	0.987212	0.913772	1.09757	1.17174	1.05678	1	1	1	1	1	1	1	1	1	0.311	0	11.4674	1
FALSE	High	Master Protein	Q7X8Y1	OSJNBa0074L08.19 protein OS=Oryza sativa subsp. japonica GN=Os04g0530300 PE=4 SV=2	0	9.28277	3.08123	1	4	1	1	357	42.643	9.77	High	High	High	High	High	High	High	High	High	Phospho [S71(100)]	1	1.24338	1.16825	1.57638	1.31193	1.32228	1.62789	1.48293	1.60085	1	1	1	1	1	1	1	1	1	0.145	0	15.0156	1
FALSE	High	Master Protein	Q7XTF0	OSJNBa0072F16.18 protein OS=Oryza sativa subsp. japonica GN=Os04g0462300 PE=4 SV=2	0	9.27581	5.88235	1	3	1	1	340	36.706	8.59	High	High	High	High	High	High	High	High	High	Phospho [S19(100)]	1	1.00587	1.06239	1.12487	1.12092	1.06525	1.21311	1.1583	1.23894	2	2	2	2	2	2	2	2	2	0.359	0	60.1302	2
FALSE	High	Master Protein	A0A0P0WUD2	Os06g0217600 protein (Fragment) OS=Oryza sativa subsp. japonica GN=Os06g0217600 PE=4 SV=1	0	9.26803	7.37705	2	17	2	1	244	26.926	5.44	High	High	High	High	High	High	High	High	High	Phospho [S984(100); S1002(100)]	1	1.03328	1.02234	1.04962	0.893719	0.872725	0.954576	0.864402	0.884269	4	4	4	4	4	4	4	4	4	0.133	0	39.1877	2
FALSE	High	Master Protein	Q6K2Y3	Os02g0307000 protein OS=Oryza sativa subsp. japonica GN=Os02g0307000 PE=4 SV=1	0	9.2491	2.5878	2	18	2	1	1082	121.835	6.81	High	High	High	High	High	High	High	High	High	Phospho [T890(100)]	1	1.30124	1.1406	1.2353	1.07568	1.20403	1.46311	1.39457	1.88917	1	1	1	1	1	1	1	1	1	0.044	0	8.12299	1
FALSE	High	Master Protein	A0A0P0X1V3	Os07g0110400 protein (Fragment) OS=Oryza sativa subsp. japonica GN=Os07g0110400 PE=4 SV=1	0	9.24872	2.39391	1	2	1	1	919	102.082	7.96	High	High	High	High	High	High	High	High	High	Phospho [S917(100)]	1	1.21293	0.956537	0.960682	0.901761	0.886408	0.969728	1.07954	1.08453	2	2	2	2	2	2	2	2	2	0.062	0	14.7622	1
FALSE	High	Master Protein	Q0DWG3	Os02g0816300 protein OS=Oryza sativa subsp. japonica GN=Os02g0816300 PE=4 SV=1	0	9.20376	1.36519	1	5	1	1	1172	131.546	6.62	High	High	High	High	High	High	High	High	High	Phospho [T49(98.5); S53(99.3)]	1	0.820124	0.779153	0.762291	0.884671	1.03691	1.01897	1.25146	1.24859	2	2	2	2	2	2	2	2	2	0.668	0	13.3788	1
FALSE	High	Master Protein	A0A0P0Y9R2	Os12g0438600 protein OS=Oryza sativa subsp. japonica GN=Os12g0438600 PE=4 SV=1	0	9.14909	9.86842	1	11	1	1	152	16.667	5.82	High	High	High	High	High	High	High	High	High	Phospho [S214(100)]	1	0.90437	0.943185	0.986092	0.871602	0.929409	0.778434	0.739544	0.905983	1	1	1	1	1	1	1	1	1	0.086	0	5.24273	1
FALSE	High	Master Protein	Q10DD6	Homeodomain protein JUBEL1, putative, expressed OS=Oryza sativa subsp. japonica GN=Os03g0732100 PE=4 SV=1	0	9.12361	2.53165	1	2	1	1	790	81.868	6.95	High	High	High	High	High	High	High	High	High	Phospho [S13(99.6)]	1	0.996735	0.950815	1.01443	0.99626	1.02812	1.10515	1.08819	1.08815	2	2	2	2	2	2	2	2	2	0.225	0	36.8068	2
FALSE	High	Master Protein	Q7X7I6	Glucose-6-phosphate 1-dehydrogenase OS=Oryza sativa subsp. japonica GN=Os04g0485300 PE=3 SV=2	0	9.1093	1.78218	2	16	2	1	505	57.663	6.96	High	High	High	High	High	High	High	High	High	Phospho [S118(100)]	1	1.11245	0.977518	0.927454	0.844459	0.858066	1.40251	1.40994	1.61533	1	1	1	1	1	1	1	1	1	0.186	0	9.84863	1
FALSE	High	Master Protein	Q60ES2	Os05g0392100 protein OS=Oryza sativa subsp. japonica GN=Os05g0392100 PE=2 SV=1	0	9.09504	2.72727	1	4	1	1	440	48.263	4.94	High	High	High	High	High	High	High	High	High	Phospho [S20(100)]	1	0.834334	0.660897	0.706585	0.802236	0.706585	0.907226	1.03344	1.20154	1	1	1	1	1	1	1	1	1	0.585	0	15.1005	1
FALSE	High	Master Protein	Q9FP98	Os01g0626300 protein OS=Oryza sativa subsp. japonica GN=Os01g0626300 PE=4 SV=1	0	9.06208	22.5	1	4	1	1	80	8.697	10.55	High	High	High	High	High	High	High	High	High	Phospho [S101(99.3)]	1	1.09925	0.84591	1.05353	1.0224	1.01834	1.19038	1.24378	1.25704	1	1	1	1	1	1	1	1	1	0.077	0	4.51736	1
FALSE	High	Master Protein	Q7X711	OSJNBa0011J08.25 protein OS=Oryza sativa subsp. japonica GN=Os04g0579700 PE=4 SV=2	0	9.05478	4.3152	1	1	1	1	533	59.473	6.06	High	High	High	High	High	High	High	High	High	Phospho [S9(100); S285(100); S288(100)]	1	1.16929	1.04237	1.7347	1.1923	1.21087	0.713091	0.749148	0.639376	4	4	4	4	4	4	4	4	4	1.848	0	17.5188	3
FALSE	High	Master Protein	Q8H5N9	Probable aquaporin PIP2-1 OS=Oryza sativa subsp. japonica GN=PIP2-1 PE=2 SV=1	0	9.02822	10.3448	3	11	3	1	290	30.266	8.43	High	High	High	High	High	High	High	High	High	Phospho [S106(98.4)]	1	1.04343	0.97561	0.98316	0.936947	0.886408	1.10326	1.06417	1.17138	2	2	2	2	2	2	2	2	2	1.371	0	14.4065	1
FALSE	High	Master Protein	A0A0P0XNX3	Os09g0473966 protein (Fragment) OS=Oryza sativa subsp. japonica GN=Os09g0473966 PE=4 SV=1	0	8.99057	8.66667	1	8	1	1	150	16.516	5.41	High	High	High	High	High	High	High	High	High	Phospho [S96(100); S735(100)]	1	1.15406	1.04618	1.30762	1.00631	1.02421	1.29928	1.15542	1.46936	2	2	2	2	2	2	2	2	2	0.101	0	28.7698	2
FALSE	High	Master Protein	Q5NBG8	La related protein-like OS=Oryza sativa subsp. japonica GN=Os01g0266000 PE=4 SV=1	0	8.95317	4.22078	2	7	2	1	924	102.298	7.53	High	High	High	High	High	High	High	High	High	Phospho [S162(100)]	1	1.13072	0.894548	1.11216	0.991234	0.893249	1.31065	1.15638	1.28116	2	2	2	2	2	2	2	2	2	0.468	0	19.4627	1
FALSE	High	Master Protein	Q0DAD7	Os06g0660800 protein (Fragment) OS=Oryza sativa subsp. japonica GN=Os06g0660800 PE=4 SV=1	0	8.93994	6.13497	1	6	1	1	163	18.309	4.89	High	High	High	High	High	High	High	High	High	Phospho [S2(100)]	1	1.09418	1.03378	1.17276	1.04653	0.968501	1.20364	1.11124	1.18948	4	4	4	4	4	4	4	4	4	0.551	2	9.70543	4
FALSE	High	Master Protein	Q06967	14-3-3-like protein GF14-F OS=Oryza sativa subsp. japonica GN=GF14F PE=1 SV=2	0	8.92656	11.9231	4	4	2	1	260	29.16	4.88	High	High	High	High	High	High	High	High	High	Phospho [S407(100)]	1	1.40578	1.08242	1.18448	1.16716	0.971432	1.39777	1.46852	1.31374	1	1	1	1	1	1	1	1	1	0.186	0	12.7824	1
FALSE	High	Master Protein	Q0JFH5	Eukaryotic translation initiation factor 3 subunit M OS=Oryza sativa subsp. japonica GN=Os04g0103200 PE=2 SV=1	0	8.91693	3.60577	1	4	1	1	416	46.334	5.24	High	High	High	High	High	High	High	High	High	Phospho [T129(100)]	1	1.07895	1.12534	1.15907	1.02139	1.0545	1.67998	1.38688	1.72752	1	1	1	1	1	1	1	1	1	0.172	0	6.54956	1
FALSE	High	Master Protein	Q6Z1H3	S-acyltransferase OS=Oryza sativa subsp. japonica GN=Os08g0535400 PE=2 SV=1	0	8.87594	6.00962	1	2	1	1	416	47.389	8.5	High	High	High	High	High	High	High	High	High	Phospho [T664(98.6)]	1	0.974405	0.976564	1.08871	0.916841	1.20012	1.17049	1.10259	1.22808	1	1	1	1	1	1	1	1	1	0.046	0	5.23946	1
FALSE	High	Master Protein	A0A0P0V8W2	Os01g0777700 protein OS=Oryza sativa subsp. japonica GN=Os01g0777700 PE=3 SV=1	0	8.83833	3.29381	1	2	1	1	759	85.711	7.02	High	High	High	High	High	High	High	High	High	Phospho [S92(99.1); S94(100)]	1	1.15508	0.914575	1.21967	0.804246	0.951886	1.58054	1.28892	1.50555	1	1	1	1	1	1	1	1	1	1.154	0	15.3192	1
FALSE	High	Master Protein	Q5W6N1	Os05g0342900 protein OS=Oryza sativa subsp. japonica GN=Os05g0342900 PE=2 SV=1	0	8.83533	19.4175	1	8	1	1	103	11.597	5.97	High	High	High	High	High	High	High	High	High	Phospho [S109(99.4)]	1	1.20684	0.84591	1.08675	1.06362	1.05353	1.16197	1.19191	1.19672	1	1	1	1	1	1	1	1	1	0.155	0	13.088	1
FALSE	High	Master Protein	Q10RZ6	Expressed protein OS=Oryza sativa subsp. japonica GN=Os03g0140700 PE=2 SV=1	0	8.81816	4.42478	1	3	1	1	339	35.532	5.03	High	High	High	High	High	High	High	High	High	Phospho [S144(100)]	1	1.17639	1.08528	1.18351	1.05959	1.12878	1.45743	1.24474	1.50796	1	1	1	1	1	1	1	1	1	0.043	0	23.9742	1
FALSE	High	Master Protein	A0A0P0W185	Os03g0669800 protein (Fragment) OS=Oryza sativa subsp. japonica GN=Os03g0669800 PE=4 SV=1	0	8.80134	2.03863	1	5	1	1	932	102.548	5.85	High	High	High	High	High	High	High	High	High	Phospho [S507(100); S544(100)]	1	0.98557	1.06621	0.893249	0.910809	0.892271	0.790745	0.987339	0.858935	2	2	2	2	2	2	2	2	2	0.218	0	29.2956	2
FALSE	High	Master Protein	Q8H5T5	Os07g0636000 protein OS=Oryza sativa subsp. japonica GN=OJ1136_D11.103 PE=2 SV=1	0	8.79795	3.33333	2	11	2	1	600	65.826	9.11	High	High	High	High	High	High	High	High	High	Phospho [T216(99.6)]	1	1.06474	0.990869	1.20696	1.24759	1.31837	1.20837	1.54248	1.40421	1	1	1	1	1	1	1	1	1	0.064	0	20.486	1
FALSE	High	Master Protein	Q10MY9	Carbon catabolite derepressing protein kinase, putative, expressed OS=Oryza sativa subsp. japonica GN=Os03g0289100 PE=2 SV=1	0	8.70974	3.10219	1	12	1	1	548	63.041	8.87	High	High	High	High	High	High	High	High	High	Phospho [S185(98.6); T187(98)]	1	1.30124	0.906946	0.909863	0.67054	0.670425	0.57767	0.576268	0.595946	2	2	2	2	2	2	2	2	2	0.245	0	24.5008	2
FALSE	High	Master Protein	Q2R2B9	Os11g0571900 protein OS=Oryza sativa subsp. japonica GN=LOC_Os11g36340 PE=2 SV=1	0	8.69312	6.74419	2	10	2	1	430	44.68	9.54	High	High	High	High	High	High	High	High	High	Phospho [S63(100)]	1	1.35402	1.21689	1.40242	1.20737	1.35453	1.7832	1.76434	1.65031	1	1	1	1	1	1	1	1	1	0.101	0	5.72572	1
FALSE	High	Master Protein	Q5ZC69	Os01g0590200 protein OS=Oryza sativa subsp. japonica GN=Os01g0590200 PE=2 SV=1	0	8.64898	6.59898	1	1	1	1	394	44.701	4.96	High	High	High	High	High	High	High	High	High	Phospho [S472(99.3); S781(98.9)]	1	1.19669	1.17302	1.1493	0.969117	0.98316	1.27466	1.24282	1.41507	2	2	2	2	2	2	2	2	2	0.093	0	16.8836	2
FALSE	High	Master Protein	Q67W58	Os06g0646400 protein OS=Oryza sativa subsp. japonica GN=Os06g0646400 PE=2 SV=1	0	8.64764	3.41727	2	5	2	1	1112	118.813	5.76	High	High	High	High	High	High	High	High	High	Phospho [S23(100); S456(100)]	1	1.1632	1.11866	1.44347	1.2496	1.32717	1.31822	1.41666	1.45488	3	3	3	3	3	3	3	3	3	0.28	0	17.5195	3
FALSE	High	Master Protein	Q5JNI5	Os01g0748600 protein OS=Oryza sativa subsp. japonica GN=P0481E12.28-1 PE=2 SV=1	0	8.64696	5.76923	3	7	3	1	468	52.966	6.89	High	High	High	High	High	High	High	High	High	Phospho [S22(100); S34(100)]	1	1.03023	0.954629	1.03105	0.934936	0.877612	1.1828	1.1266	1.15329	3	3	3	3	3	3	3	3	3	0.239	0	35.3634	3
FALSE	High	Master Protein	Q2QUQ9	Os12g0256300 protein OS=Oryza sativa subsp. japonica GN=Os12g15420 PE=2 SV=1	0	8.63166	1.90597	3	17	3	1	787	89.956	7.8	High	High	High	High	High	High	High	High	High	Phospho [S230(100)]	1	1.06474	0.991823	1.14832	1.08674	1.07991	1.35516	1.28604	1.41266	1	1	1	1	1	1	1	1	1	0.52	0	12.6307	1
FALSE	High	Master Protein	Q6H5G6	Os09g0375400 protein OS=Oryza sativa subsp. japonica GN=Os09g0375400 PE=2 SV=1	0	8.60179	6.77966	1	6	1	1	236	24.252	6.92	High	High	High	High	High	High	High	High	High	Phospho [S333(100); S626(100)]	1	1.04343	1.15204	1.1796	1.08875	1.11998	1.31728	1.23705	1.29564	2	2	2	2	2	2	2	2	2	0.084	0	10.6771	2
FALSE	High	Master Protein	A0A0P0VNC6	Os02g0689800 protein (Fragment) OS=Oryza sativa subsp. japonica GN=Os02g0689800 PE=4 SV=1	0	8.58153	2.90807	2	4	2	1	1066	121.09	5.49	High	High	High	High	High	High	High	High	High	Phospho [S40(100)]	1	1.12158	0.967027	1.01346	0.976154	0.834611	1.30402	1.26491	1.45368	1	1	1	1	1	1	1	1	1	0.066	0	13.5748	1
FALSE	High	Master Protein	Q5KQN3	LIM domain-containing protein, putative, expressed OS=Oryza sativa subsp. japonica GN=Os03g0626600 PE=4 SV=1	0	8.56944	2.64766	1	3	1	1	491	55.666	6.42	High	High	High	High	High	High	High	High	High	Phospho [S90(100)]	1	1.15508	0.978471	1.10337	0.990228	0.938204	0.960258	0.982537	1.07126	1	1	1	1	1	1	1	1	1	0.311	0	22.5589	1
FALSE	High	Master Protein	B7E741	Os05g0589000 protein OS=Oryza sativa subsp. japonica GN=Os05g0589000 PE=2 SV=1	0	8.56133	3.1339	1	13	1	1	351	39.488	9.58	High	High	High	High	High	High	High	High	High	Phospho [S232(100)]	1	1.05662	0.84591	0.951886	0.967106	0.852202	0.894915	0.964288	1.12554	1	1	1	1	1	1	1	1	1	0.194	0	17.4344	1
FALSE	High	Master Protein	Q84T92	Chalcone--flavonone isomerase OS=Oryza sativa subsp. japonica GN=CHI PE=2 SV=1	0	8.56051	7.29614	1	4	1	1	233	23.878	5.27	High	High	High	High	High	High	High	High	High	Phospho [S174(99.6)]	1	1.18756	1.06621	1.10239	0.974143	0.986092	1.16955	1.19383	1.14484	1	1	1	1	1	1	1	1	1	0.096	0	14.639	1
FALSE	High	Master Protein	Q5YLY5	Os06g0724100 protein OS=Oryza sativa subsp. japonica GN=Os06g0724100 PE=2 SV=1	0	8.54821	3.07377	1	3	1	1	488	52.701	7.55	High	High	High	High	High	High	High	High	High	Phospho [S380(99.5)]	1	1.11752	0.929834	1.05157	1.00129	0.864907	1.55781	1.38688	1.48263	1	1	1	1	1	1	1	1	1	0.096	0	14.2195	1
FALSE	High	Master Protein	Q5JK78	Os01g0550100 protein OS=Oryza sativa subsp. japonica GN=Os01g0550100 PE=2 SV=1	0	8.53387	4.00844	1	10	1	1	474	53.132	6.16	High	High	High	High	High	High	High	High	High	Phospho [S278(100); S281(100)]	1	1.01196	0.888826	1.1063	1.04049	1.01346	1.28413	1.1631	1.41507	2	2	2	2	2	2	2	2	2	0.334	0	8.86199	1
FALSE	High	Master Protein	A0A0P0V6D7	Os01g0672300 protein (Fragment) OS=Oryza sativa subsp. japonica GN=Os01g0672300 PE=4 SV=1	0	8.44361	5.02392	1	3	1	1	418	45.608	4.67	High	High	High	High	High	High	High	High	High	Phospho [S15(100); S46(100)]	1	0.937865	1.08051	0.888362	0.893719	0.821906	1.10136	1.07762	1.28116	2	2	2	2	2	2	2	2	2	0.125	0	8.68545	2
FALSE	High	Master Protein	Q6YVX5	Chloride channel protein OS=Oryza sativa subsp. japonica GN=Os02g0558100 PE=3 SV=1	0	8.4295	3.35821	2	3	2	1	804	86.934	7.75	High	High	High	High	High	High	High	High	High	Phospho [S888(100); S893(99)]	1	1.0688	1.28174	1.01639	1.3451	1.06818	1.69324	1.43106	1.58999	1	1	1	1	1	1	1	1	1	0.03	0	4.68066	1
FALSE	High	Master Protein	A0A0P0WJ59	Os05g0196100 protein OS=Oryza sativa subsp. japonica GN=Os05g0196100 PE=4 SV=1	0	8.42285	1.74966	1	1	1	1	1486	162.552	7.83	High	High	High	High	High	High	High	High	High	Phospho [T146(100); S149(100)]	1	0.93279	0.935556	0.814088	0.932926	0.947	1.18943	1.1583	1.43799	1	1	1	1	1	1	1	1	1	0.259	0	5.5387	1
FALSE	High	Master Protein	Q75M67	Expressed protein OS=Oryza sativa subsp. japonica GN=Os03g0381300 PE=4 SV=1	0	8.38489	17.341	1	1	1	1	173	19.313	4.46	High	High	High	High	High	High	High	High	High	Phospho [S87(100)]	1	1.17741	1.00136	1.26364	1.12796	1.10434	1.55497	1.40417	1.80232	1	1	1	1	1	1	1	1	1	0.194	0	13.8371	1
FALSE	High	Master Protein	Q40682	Elongation factor 1-delta 2 OS=Oryza sativa subsp. japonica GN=Os03g0406200 PE=2 SV=3	0	8.35213	6.63717	1	3	1	1	226	24.639	4.53	High	High	High	High	High	High	High	High	High	Phospho [S454(100)]	1	1.13579	1.10912	1.02323	0.975149	1.20598	1.03791	1.13909	1.27996	1	1	1	1	1	1	1	1	1	0.093	0	14.5229	1
FALSE	High	Master Protein	A0A0P0VVJ6	Os03g0254900 protein (Fragment) OS=Oryza sativa subsp. japonica GN=Os03g0254900 PE=4 SV=1	0	8.34285	2.9106	1	3	1	1	481	53.497	7.01	High	High	High	High	High	High	High	High	High	Phospho [S534(100)]	1	1.15	0.947	1.00466	0.954037	1.10728	1.21027	1.17559	1.20034	1	1	1	1	1	1	1	1	1	0.129	0	7.65455	1
FALSE	High	Master Protein	Q10LF7	Nuclear/nucleolar GTPase 2 OS=Oryza sativa subsp. japonica GN=NUG2 PE=1 SV=1	0	8.33876	2.99065	1	3	1	1	535	60.143	9.39	High	High	High	High	High	High	High	High	High	Phospho [T453(97.4); S458(97.4); S526(100)]	1	1.14594	0.885011	0.945045	1.00229	0.836566	1.14871	1.13717	1.16777	2	2	2	2	2	2	2	2	2	0.292	0	7.22917	2
FALSE	High	Master Protein	Q9SXJ8	Sodium/hydrogen exchanger OS=Oryza sativa subsp. japonica GN=OsNHX1 PE=2 SV=1	0	8.31862	6.72897	2	4	2	1	535	59.032	8.47	High	High	High	High	High	High	High	High	High	Phospho [S123(100); S125(100); S158(100); S160(100); S162(100)]	1	1.0617	0.930788	0.980228	0.927899	0.861975	0.983933	0.961407	0.959064	2	2	2	2	2	2	2	2	2	0.778	0	26.4604	2
FALSE	High	Master Protein	Q6K4N0	Serine/arginine-rich splicing factor RSZ21 OS=Oryza sativa subsp. japonica GN=RSZP21 PE=2 SV=1	0	8.31749	8.64865	2	10	2	1	185	21.011	11.24	High	High	High	High	High	High	High	High	High	Phospho [S8(100); S10(100)]	1	1.10636	1.09196	1.10923	0.99626	0.991956	1.10515	1.09875	0.992842	1	1	1	1	1	1	1	1	1	0.292	0	10.8351	1
FALSE	High	Master Protein	Q0IWU2	Os10g0487900 protein (Fragment) OS=Oryza sativa subsp. japonica GN=Os10g0487900 PE=4 SV=1	0	8.31194	8.44156	1	2	1	1	154	18.487	9.33	High	High	High	High	High	High	High	High	High	Phospho [S189(100); S193(100); T196(100); T202(99.3)]	1	1.1094	1.02806	1.1493	0.983191	0.859043	1.24625	1.07858	1.41025	3	3	3	3	3	3	3	3	3	1.031	0	9.2737	3
FALSE	High	Master Protein	Q6L5B4	Os05g0588300 protein OS=Oryza sativa subsp. japonica GN=Os05g0588300 PE=4 SV=1	0	8.2866	9.85222	3	6	3	1	203	21.643	5.16	High	High	High	High	High	High	High	High	High	Phospho [S56(100)]	1	1.62908	0.992776	1.35258	1.02039	0.920613	1.48679	1.26779	1.49349	1	1	1	1	1	1	1	1	1	0.075	0	4.58252	1
FALSE	High	Master Protein	A0A0P0W2C7	Os03g0719500 protein (Fragment) OS=Oryza sativa subsp. japonica GN=Os03g0719500 PE=4 SV=1	0	8.28575	2.82392	1	1	1	1	602	65.778	4.67	High	High	High	High	High	High	High	High	High	Phospho [S334(99.2)]	1	1.18045	1.02806	0.996842	1.08372	0.821906	1.06443	0.977734	1.20154	1	1	1	1	1	1	1	1	1	0.08	0	4.96761	1
FALSE	High	Master Protein	Q6Z7C7	Os02g0113800 protein OS=Oryza sativa subsp. japonica GN=Os02g0113800 PE=2 SV=1	0	8.26552	4.51745	1	2	1	1	487	54.509	6.55	High	High	High	High	High	High	High	High	High	Phospho [S969(99.5)]	1	1.0617	1.00231	1.01541	0.910809	0.881521	1.1364	1.09011	1.1545	1	1	1	1	1	1	1	1	1	0.077	0	17.0961	1
FALSE	High	Master Protein	Q0J364	Os09g0252800 protein (Fragment) OS=Oryza sativa subsp. japonica GN=Os09g0252800 PE=4 SV=1	0	8.26216	0.866426	1	10	1	1	1385	152.675	4.98	High	High	High	High	High	High	High	High	High	Phospho [T392(100); T396(100)]	1	1.2718	1.04714	1.36137	1.05256	1.07014	1.19985	1.11316	1.12434	2	2	2	2	2	2	2	2	2	0.35	0	24.9188	2
FALSE	High	Master Protein	Q5Z904	ATP/GTP-binding protein-like OS=Oryza sativa subsp. japonica GN=Os06g0562700 PE=4 SV=1	0	8.25945	2.78422	2	11	2	1	431	48.232	9.86	High	High	High	High	High	High	High	High	High	Phospho [S946(100)]	1	1.37432	1.07193	0.981205	1.36119	1.10728	1.25667	1.41954	1.51641	1	1	1	1	1	1	1	1	1	0.043	0	4.41101	1
FALSE	High	Master Protein	Q67TV0	GPI inositol-deacylase PGAP1-like protein OS=Oryza sativa subsp. japonica GN=Os09g0266400 PE=2 SV=1	0	8.25547	1.64384	1	1	1	1	1095	120.493	8.65	High	High	High	High	High	High	High	High	High	Phospho [S1017(100)]	1	1.20481	1.07765	0.752518	0.666519	0.601037	0.617444	0.549375	0.653852	1	1	1	1	1	1	1	1	1	0.065	0	28.0479	1
FALSE	High	Master Protein	Q10A91	Expressed protein OS=Oryza sativa subsp. japonica GN=LOC_Os03g64320 PE=2 SV=1	0	8.24513	0.955414	1	16	1	1	1256	139.329	6.79	High	High	High	High	High	High	High	High	High	Phospho [S521(100); S524(100); S532(100)]	1	0.874935	0.704766	0.7447	0.687631	0.692903	0.756653	0.864402	0.856522	3	3	3	3	3	3	3	3	3	0.274	0	27.03	3
FALSE	High	Master Protein	Q75GE8	Calcium-dependent protein kinase, isoform AK1, putative, expressed OS=Oryza sativa subsp. japonica GN=Os03g0808600 PE=2 SV=1	0	8.24409	3.34572	3	12	3	1	538	60.62	6.61	High	High	High	High	High	High	High	High	High	Phospho [S201(100); S1012(99.4)]	1	1.19568	1.05858	1.15321	0.896735	1.00662	1.11746	1.13141	1.32942	1	1	1	1	1	1	1	1	1	0.105	0	7.75179	2
FALSE	High	Master Protein	A0A0N7KNQ0	Os07g0571100 protein (Fragment) OS=Oryza sativa subsp. japonica GN=Os07g0571100 PE=4 SV=1	0	8.22369	3.93053	2	3	1	1	1094	114.193	9.39	High	High	High	High	High	High	High	High	High	Phospho [S140(100)]	1	1.03632	0.623704	0.773041	0.761018	0.725154	0.669529	0.64638	0.642995	1	1	1	1	1	1	1	1	1	0.778	0	18.1959	1
FALSE	High	Master Protein	Q6ZCC6	Os08g0112600 protein OS=Oryza sativa subsp. japonica GN=Os08g0112600 PE=4 SV=1	0	8.21965	7.69231	1	6	1	1	143	16.415	5.72	High	High	High	High	High	High	High	High	High	Phospho [S235(100)]	1	1.20684	1.21975	0.820929	0.689641	0.632311	0.675211	0.620448	0.640582	1	1	1	1	1	1	1	1	1	0.116	0	17.6926	1
FALSE	High	Master Protein	Q69X98	Os06g0589500 protein OS=Oryza sativa subsp. japonica GN=Os06g0589500 PE=2 SV=1	0	8.20163	3.17919	1	4	1	1	346	37.352	9.47	High	High	High	High	High	High	High	High	High	Phospho [S149(100); S373(100)]	1	1.07388	0.969888	1.17471	1.01737	0.920613	1.53414	1.27643	1.34872	2	2	2	2	2	2	2	2	2	0.09	0	7.30812	2
FALSE	High	Master Protein	Q0D412	Os07g0655500 protein OS=Oryza sativa subsp. japonica GN=Os07g0655500 PE=4 SV=1	0	8.1905	1.93504	2	3	2	1	1447	158.084	6.64	High	High	High	High	High	High	High	High	High	Phospho [S257(100); S265(98.5); S278(100); S280(99.3); S285(100)]	1	1.13579	0.971796	1.04962	0.942979	0.966546	1.37315	1.35903	1.6105	1	1	1	1	1	1	1	1	1	1.031	0	24.4928	2
FALSE	High	Master Protein	Q10LL5	Os03g0344100 protein OS=Oryza sativa subsp. japonica GN=Os03g0344100 PE=2 SV=1	0	8.16535	9.09091	2	10	1	1	286	31.92	10.54	High	High	High	High	High	High	High	High	High	Phospho [S153(100)]	1	1.01095	0.877382	0.914749	0.876628	0.743722	1.15629	1.09875	1.23412	1	1	1	1	1	1	1	1	1	0.212	0	9.56418	1
FALSE	High	Master Protein	Q5VQ75	DNA repair protein XRCC1-like OS=Oryza sativa subsp. japonica GN=Os06g0144000 PE=2 SV=1	0	8.12977	2.88184	1	3	1	1	347	39.105	6.67	High	High	High	High	High	High	High	High	High	Phospho [S90(100); S99(98.9); S187(100)]	1	1.03531	0.96512	0.883476	0.873613	0.783792	0.837148	0.888413	0.821538	3	3	3	3	3	3	3	3	3	0.369	0	13.8898	3
FALSE	High	Master Protein	Q2R0P4	Os11g0637700 protein OS=Oryza sativa subsp. japonica GN=Os11g0637700 PE=2 SV=2	0	8.11253	6.42398	3	5	3	1	467	49.018	8.53	High	High	High	High	High	High	High	High	High	Phospho [S20(100)]	1	0.89219	0.737191	0.682153	0.792183	0.821906	0.734872	0.886492	1.05195	2	2	2	2	2	2	2	2	2	0.212	0	22.6935	1
FALSE	High	Master Protein	Q75J49	Os03g0638800 protein OS=Oryza sativa subsp. japonica GN=Os03g0638800 PE=2 SV=1	0	8.07484	3.43008	1	7	1	1	379	41.731	7.94	High	High	High	High	High	High	High	High	High	Phospho [S89(100)]	1	1.11346	1.02902	1.07209	1.02441	0.904976	1.17807	1.06898	1.33063	1	1	1	1	1	1	1	1	1	0.11	0	9.88458	1
FALSE	High	Master Protein	Q8S0V9	DnaJ-like protein OS=Oryza sativa subsp. japonica GN=Os01g0556400 PE=2 SV=1	0	8.05576	4.73684	1	2	1	1	380	42.723	8.06	High	High	High	High	High	High	High	High	High	Phospho [S412(100); S534(100)]	1	1.14493	1.06049	1.16885	1.04753	0.947977	1.18659	1.11316	1.21481	2	2	2	2	2	2	2	2	2	0.129	0	16.0051	2
FALSE	High	Master Protein	Q6K977	Zinc finger CCCH domain-containing protein 19 OS=Oryza sativa subsp. japonica GN=Os02g0831100 PE=2 SV=2	0	8.05174	4.48223	2	5	2	1	647	71.425	5.48	High	High	High	High	High	High	High	High	High	Phospho [S365(100); S401(100)]	1	1.19466	0.967981	1.1063	1.05557	0.90009	1.17049	1.07954	1.13519	2	2	2	2	2	2	2	2	2	0.202	0	12.286	2
FALSE	High	Master Protein	A0A0P0XAP5	S-acyltransferase OS=Oryza sativa subsp. japonica GN=Os08g0103400 PE=3 SV=1	0	8.04841	8.25243	2	4	2	1	412	46.466	7.99	High	High	High	High	High	High	High	High	High	Phospho [S79(100); S89(100)]	1	1.07591	1.10912	1.01443	1.14203	1.01932	1.43755	1.43875	1.45971	1	1	1	1	1	1	1	1	1	0.077	0	20.1784	1
FALSE	High	Master Protein	Q9SNN8	Os06g0130400 protein OS=Oryza sativa subsp. japonica GN=Os06g0130400 PE=2 SV=1	0	8.04619	4.24354	1	4	1	1	542	59.438	8.78	High	High	High	High	High	High	High	High	High	Phospho [S79(100)]	1	0.850574	0.336648	0.649902	0.512707	0.452488	0.17993	0.287173	0.144764	2	2	2	2	2	2	2	2	2	1.683	0	66.5581	2
FALSE	High	Master Protein	Q8H4P7	Os07g0147500 protein OS=Oryza sativa subsp. japonica GN=OJ1470_H06.117 PE=2 SV=1	0	8.03985	11.6788	2	24	2	1	137	14.155	9.86	High	High	High	High	High	High	High	High	High	Phospho [S54(100)]	1	1.17538	0.968935	0.969478	0.714774	0.822883	0.818208	0.747227	0.780521	1	1	1	1	1	1	1	1	1	0.105	0	15.7731	1
FALSE	High	Master Protein	Q7XRK9	OSJNBa0027P08.13 protein OS=Oryza sativa subsp. japonica GN=Os04g0445600 PE=4 SV=2	0	8.03948	3.83693	1	3	1	1	417	43.9	7.03	High	High	High	High	High	High	High	High	High	Phospho [S27(100); S31(100); S136(99.2); S137(100); S156(100); S160(100)]	1	1.06576	1.01757	1.06916	0.977159	1.07796	1.11178	1.14965	1.26428	3	3	3	3	3	3	3	3	3	0.468	0	12.8579	3
FALSE	High	Master Protein	A0A0P0XWJ2	Os10g0532150 protein OS=Oryza sativa subsp. japonica GN=Os10g0532150 PE=4 SV=1	0	8.03161	15.7258	3	7	3	1	248	28.336	6.87	High	High	High	High	High	High	High	High	High	Phospho [S249(100)]	1	0.917565	0.751496	0.699744	0.662498	0.562923	0.733925	0.720335	0.740711	1	1	1	1	1	1	1	1	1	0.311	0	15.7176	1
FALSE	High	Master Protein	Q7Y0D4	Thioredoxin-like protein HCF164, chloroplastic OS=Oryza sativa subsp. japonica GN=Os03g0767500 PE=2 SV=1	0	8.00803	4.19847	1	6	1	1	262	28.554	5.55	High	High	High	High	High	High	High	High	High	Phospho [S195(100)]	1	1.28804	1.32942	1.37701	1.12494	1.00955	1.33432	1.38208	1.18827	1	1	1	1	1	1	1	1	1	0.083	0	4.72064	1
FALSE	High	Master Protein	Q9SLX0	Importin subunit alpha-1b OS=Oryza sativa subsp. japonica GN=Os05g0155601 PE=1 SV=2	0	7.96457	2.99625	1	1	1	1	534	58.53	5.31	High	High	High	High	High	High	High	High	High	Phospho [S103(100)]	1	1.11549	1.21403	1.14637	1.2687	1.32619	1.28224	1.33406	1.49952	1	1	1	1	1	1	1	1	1	0.179	0	11.0393	1
FALSE	High	Master Protein	Q7XB67	Os07g0204100 protein OS=Oryza sativa subsp. japonica GN=P0431A02.22 PE=4 SV=1	0	7.90205	6.9869	1	3	1	1	229	24.335	4.54	High	High	High	High	High	High	High	High	High	Phospho [S421(100); T430(100)]	1	0.998765	0.880243	1.04473	1.25663	1.22651	1.10515	1.37152	1.14123	3	3	3	3	3	3	3	3	3	0.094	0	15.3469	3
FALSE	High	Master Protein	Q9MBF2	Os08g0539700 protein OS=Oryza sativa subsp. japonica GN=PibH8 PE=2 SV=1	0	7.89434	2.36542	3	8	3	1	1226	138.001	8.22	High	High	High	High	High	High	High	High	High	Phospho [S415(100)]	1	1.15609	1.14155	1.23921	1.14404	1.03984	1.39682	1.2044	1.35958	1	1	1	1	1	1	1	1	1	0.089	0	8.18079	1
FALSE	High	Master Protein	Q6ZKL8	Probable protein phosphatase 2C 66 OS=Oryza sativa subsp. japonica GN=Os08g0500300 PE=2 SV=1	0	7.87746	4.89642	1	4	1	1	531	57.635	5.36	High	High	High	High	High	High	High	High	High	Phospho [S63(100)]	1	1.18654	0.979425	1.03496	1.05155	1.11803	1.41103	1.41378	1.4766	1	1	1	1	1	1	1	1	1	0.194	0	4.82147	1
FALSE	High	Master Protein	A0A0P0WXQ4	Os06g0550000 protein (Fragment) OS=Oryza sativa subsp. japonica GN=Os06g0550000 PE=3 SV=1	0	7.87031	7.03518	1	1	1	1	199	22.443	9.79	High	High	High	High	High	High	High	High	High	Phospho [T365(99.2)]	1	0.996735	0.919343	1.08284	1.00028	1.00564	1.10704	1.20536	1.27393	2	2	2	2	2	2	2	2	2	0.233	0	6.93893	2
FALSE	High	Master Protein	Q6K9M2	Os02g0791800 protein OS=Oryza sativa subsp. japonica GN=Os02g0791800 PE=2 SV=1	0	7.84437	5.34759	2	3	2	1	374	40.85	8.63	High	High	High	High	High	High	High	High	High	Phospho [T111(100); S113(100); S117(100); S196(100); S198(100); S226(100)]	1	1.02922	1.05477	1.13464	1.01033	0.991956	1.2472	1.25626	1.23653	3	3	3	3	3	3	3	3	3	0.54	0	43.0213	3
FALSE	High	Master Protein	A0A0N7KN09	Os07g0179200 protein (Fragment) OS=Oryza sativa subsp. japonica GN=Os07g0179200 PE=4 SV=1	0	7.84245	10.2837	3	23	3	1	282	31.287	11.66	High	High	High	High	High	High	High	High	High	Phospho [S127(99.6)]	1	0.907415	0.838281	0.93625	0.891708	0.818974	0.807791	0.913384	0.947	1	1	1	1	1	1	1	1	1	0.166	0	4.47913	1
FALSE	High	Master Protein	Q9LGP4	Os01g0120500 protein OS=Oryza sativa subsp. japonica GN=Os01g0120500 PE=4 SV=2	0	7.77885	7.08661	1	1	1	1	254	27.521	10.13	High	High	High	High	High	High	High	High	High	Phospho [S126(100)]	1	0.935835	0.819207	0.790633	0.828374	0.699744	0.832413	0.934514	1.01697	2	2	2	2	2	2	2	2	2	0.389	0	16.5101	1
FALSE	High	Master Protein	B7FAH5	Os02g0722700 protein OS=Oryza sativa subsp. japonica GN=Os02g0722700 PE=2 SV=1	0	7.74925	4.54545	1	5	1	1	286	31.349	9.25	High	High	High	High	High	High	High	High	High	Phospho [S539(98); T544(99)]	1	1.03531	0.958444	0.982183	0.904777	0.899112	1.18564	1.14965	1.49831	3	3	3	3	3	3	3	3	3	0.28	0	28.9174	2
FALSE	High	Master Protein	Q6H593	Arm repeat-containing protein-like OS=Oryza sativa subsp. japonica GN=Os09g0386200 PE=4 SV=1	0	7.7334	5.85009	2	11	2	1	547	57.068	7.08	High	High	High	High	High	High	High	High	High	Phospho [S289(99.3)]	1	0.98557	0.938417	0.979251	1.03145	0.859043	1.45175	1.36575	1.72149	2	2	2	2	2	2	2	2	2	0.166	0	11.4549	2
FALSE	High	Master Protein	Q5N770	Os01g0813900 protein OS=Oryza sativa subsp. japonica GN=Os01g0813900 PE=4 SV=1	0	7.7302	3.62047	2	9	2	1	801	87.454	6.16	High	High	High	High	High	High	High	High	High	Phospho [S207(100)]	1	1.01501	0.873567	0.926477	0.854512	0.733949	0.991509	1.13525	1.06161	2	2	2	2	2	2	2	2	2	0.585	0	10.4865	2
FALSE	High	Master Protein	Q69IX0	Os08g0309300 protein OS=Oryza sativa subsp. japonica GN=B1100F03.101 PE=4 SV=1	0	7.71839	5.55556	2	3	2	1	216	23.7	9.63	High	High	High	High	High	High	High	High	High	Phospho [S223(100)]	1	1.1094	1.10912	1.1493	1.0606	1.04668	1.07674	1.06898	1.13761	1	1	1	1	1	1	1	1	1	0.08	0	22.3775	1
FALSE	High	Master Protein	Q7XZH4	Os03g0811500 protein OS=Oryza sativa subsp. japonica GN=Os03g0811500 PE=2 SV=1	0	7.71534	3.44168	1	6	1	1	523	57.898	8.87	High	High	High	High	High	High	High	High	High	Phospho [S587(100)]	1	1.03328	0.949861	0.876635	0.930915	0.860998	1.22163	1.18231	1.2691	1	1	1	1	1	1	1	1	1	0.07	0	7.80482	1
FALSE	High	Master Protein	Q2QN76	Expressed protein OS=Oryza sativa subsp. japonica GN=Os12g0576300 PE=4 SV=2	0	7.71309	3.16456	1	2	1	1	632	70.334	5.22	High	High	High	High	High	High	High	High	High	Phospho [S162(99.4)]	1	1.01298	0.907899	0.990001	0.846469	0.819951	1.10326	1.00559	1.12072	2	2	2	2	2	2	2	2	2	0.778	0	21.9582	2
FALSE	High	Master Protein	Q6H5V7	Os02g0637900 protein OS=Oryza sativa subsp. japonica GN=Os02g0637900 PE=2 SV=1	0	7.70517	11.6279	2	15	2	1	215	23.881	8.19	High	High	High	High	High	High	High	High	High	Phospho [S360(100)]	1	1.94881	1.33515	1.65456	1.35415	1.31642	2.34856	2.22824	2.18715	1	1	1	1	1	1	1	1	1	0.179	0	4.97575	1
FALSE	High	Master Protein	Q6L529	Os05g0512400 protein OS=Oryza sativa subsp. japonica GN=Os05g0512400 PE=2 SV=1	0	7.69702	7.56098	1	1	1	1	410	44.933	7.5	High	High	High	High	High	High	High	High	High	Phospho [S723(100); S726(100)]	1	1.07794	0.950815	0.948955	0.891708	0.891294	1.24815	0.938356	0.895126	1	1	1	1	1	1	1	1	1	0.035	0	4.28327	1
FALSE	High	Master Protein	Q0DS53	Os03g0333100 protein OS=Oryza sativa subsp. japonica GN=Os03g0333100 PE=4 SV=1	0	7.64035	1.69492	1	1	1	1	1180	133.618	8.43	High	High	High	High	High	High	High	High	High	Phospho [T114(100); T119(100)]	1	1.09113	0.905038	1.18351	1.0425	1.07796	0.908173	0.965248	0.957857	1	1	1	1	1	1	1	1	1	0.468	0	23.416	1
FALSE	High	Master Protein	Q8GVP5	Os07g0530700 protein OS=Oryza sativa subsp. japonica GN=P0681F05.121-1 PE=2 SV=1	0	7.62986	7.26257	1	5	1	1	179	17.711	9.86	High	High	High	High	High	High	High	High	High	Phospho [S85(100); S98(100); S102(100); S197(99.5)]	1	0.95106	0.89264	0.847316	0.786151	0.857089	1.31917	1.38784	1.48383	3	3	3	3	3	3	3	3	3	0.848	0	5.55645	3
FALSE	High	Master Protein	Q0JDT2	Os04g0379600 protein OS=Oryza sativa subsp. japonica GN=Os04g0379600 PE=4 SV=1	0	7.62264	15.1786	3	4	3	1	224	24.691	9.67	High	High	High	High	High	High	High	High	High	Phospho [S791(99.7)]	1	1.1297	0.985147	1.05255	0.97917	0.903022	1.07958	1.02768	1.03265	2	2	2	2	2	2	2	2	2	0.141	0	27.7799	1
FALSE	High	Master Protein	Q6EUQ1	Os02g0176100 protein OS=Oryza sativa subsp. japonica GN=OJ1077_E05.22-1 PE=2 SV=1	0	7.61304	1.25786	1	14	1	1	795	85.768	6.21	High	High	High	High	High	High	High	High	High	Phospho [S307(100); S310(100)]	1	1.10839	0.947954	1.18253	1.12896	1.03398	1.48205	1.40033	1.31012	1	1	1	1	1	1	1	1	1	0.116	0	5.11631	1
FALSE	High	Master Protein	Q6Z0G0	GrpE protein homolog OS=Oryza sativa subsp. japonica GN=Os08g0338700 PE=2 SV=1	0	7.6103	8.68167	1	1	1	1	311	33.698	5.35	High	High	High	High	High	High	High	High	High	Phospho [S221(99.6)]	1	0.99572	0.964166	1.2011	1.1551	1.18448	1.2936	1.26203	1.35958	2	2	2	2	2	2	2	2	2	0.311	0	22.3532	2
FALSE	High	Master Protein	Q53KV7	Os11g0444700 protein OS=Oryza sativa subsp. japonica GN=LOC_Os11g25780 PE=2 SV=1	0	7.59889	12.9464	2	8	2	1	224	24.447	8.41	High	High	High	High	High	High	High	High	High	Phospho [T87(100)]	1	1.09519	1.33515	1.18448	1.16817	1.10825	1.53887	1.26779	1.32218	1	1	1	1	1	1	1	1	1	0.093	0	12.6349	1
FALSE	High	Master Protein	A0A0N7KC65	Os01g0104100 protein (Fragment) OS=Oryza sativa subsp. japonica GN=Os01g0104100 PE=4 SV=1	0	7.58137	3.58852	1	3	1	1	418	45.483	5.54	High	High	High	High	High	High	High	High	High	Phospho [S591(99.6); S594(100); S906(99.2)]	1	0.992675	1.03378	1.27342	0.991234	1.09653	1.10041	0.996943	0.963889	2	2	2	2	2	2	2	2	2	0.108	0	10.5052	2
FALSE	High	Master Protein	A0A0P0WNS8	Os05g0481100 protein OS=Oryza sativa subsp. japonica GN=Os05g0481100 PE=3 SV=1	0	7.54227	2.83613	2	6	2	1	952	104.251	6.25	High	High	High	High	High	High	High	High	High	Phospho [S6(100)]	1	1.03632	0.988962	1.033	0.904777	0.87468	1.14019	1.16118	1.24377	1	1	1	1	1	1	1	1	1	0.194	0	8.77923	1
FALSE	High	Master Protein	Q0ILJ3	Sucrose transport protein SUT2 OS=Oryza sativa subsp. japonica GN=SUT2 PE=2 SV=2	0	7.52433	3.39321	1	2	1	1	501	53.181	8.9	High	High	High	High	High	High	High	High	High	Phospho [S170(100)]	1	0.992675	0.917436	0.869794	0.743928	0.735904	0.790745	0.685759	0.79741	2	2	2	2	2	2	2	2	2	0.311	0	16.1191	2
FALSE	High	Master Protein	Q69JI7	BHLH protein family-like OS=Oryza sativa subsp. japonica GN=P0556A05.2-1 PE=2 SV=1	0	7.46349	6.54762	2	12	2	1	504	54.156	7.36	High	High	High	High	High	High	High	High	High	Phospho [S362(100)]	1	1.06779	1.0891	1.06134	0.966101	0.925499	1.23773	1.09203	1.28478	1	1	1	1	1	1	1	1	1	0.212	0	28.4159	1
FALSE	High	Master Protein	A0A0P0VPM8	Os02g0741400 protein (Fragment) OS=Oryza sativa subsp. japonica GN=Os02g0741400 PE=4 SV=1	0	7.45818	1.94553	1	9	1	1	514	54.952	4.49	High	High	High	High	High	High	High	High	High	Phospho [S415(100)]	1	1.3865	1.23406	1.01052	1.07769	1.07698	1.1828	1.15254	1.21119	1	1	1	1	1	1	1	1	1	0.055	0	3.63638	1
FALSE	High	Master Protein	Q5VR92	Os06g0275900 protein OS=Oryza sativa subsp. japonica GN=Os06g0275900 PE=2 SV=1	0	7.45506	2.48691	1	1	1	1	764	84.144	5.14	High	High	High	High	High	High	High	High	High	Phospho [S54(100); S55(100)]	1	1.47886	1.09387	1.53826	1.30388	1.16591	1.79741	1.64524	1.97845	1	1	1	1	1	1	1	1	1	0.072	0	4.16693	1
FALSE	High	Master Protein	Q651A9	Os09g0571500 protein OS=Oryza sativa subsp. japonica GN=B1331F11.10-1 PE=4 SV=1	0	7.42585	3.861	1	1	1	1	518	57.784	8.66	High	High	High	High	High	High	High	High	High	Phospho [S50(100)]	1	1.2515	1.07002	1.08089	0.805252	0.807247	0.755706	0.670391	0.820331	1	1	1	1	1	1	1	1	1	0.11	0	25.7169	1
FALSE	High	Master Protein	Q5JLH8	Os01g0534900 protein OS=Oryza sativa subsp. japonica GN=Os01g0534900 PE=2 SV=1	0	7.42522	1.43229	1	8	1	1	768	87.796	8.6	High	High	High	High	High	High	High	High	High	Phospho [S666(99.2); S750(99.6)]	1	1.12158	1.02997	1.18741	0.936947	1.02421	1.26709	1.21977	1.24256	2	2	2	2	2	2	2	2	2	0.077	0	8.90221	2
FALSE	High	Master Protein	Q0D8I9	Protein ETHYLENE-INSENSITIVE 2 OS=Oryza sativa subsp. japonica GN=EIN2 PE=2 SV=1	0	7.42192	2.02966	2	5	2	1	1281	138.126	6.34	High	High	High	High	High	High	High	High	High	Phospho [S155(100)]	1	0.99166	0.8173	0.846338	0.805252	0.894226	0.945106	0.971011	1.03265	1	1	1	1	1	1	1	1	1	0.468	0	13.7126	1
FALSE	High	Master Protein	P0DKK8	40S ribosomal protein S10-1 OS=Oryza sativa subsp. japonica GN=RPS10-1 PE=2 SV=1	0	7.389	6.55738	1	6	1	1	183	20.25	9.76	High	High	High	High	High	High	High	High	High	Phospho [T206(100)]	1	1.27485	1.0767	1.19719	1.06261	1.0203	1.19322	1.1266	1.15932	1	1	1	1	1	1	1	1	1	0.122	0	8.7479	1
FALSE	High	Master Protein	Q5TKJ2	Os05g0429400 protein OS=Oryza sativa subsp. japonica GN=Os05g0429400 PE=4 SV=1	0	7.37676	2.05128	1	3	1	1	585	63.909	4.6	High	High	High	High	High	High	High	High	High	Phospho [S259(100)]	1	1.19974	0.985147	1.13953	1.07166	1.01541	1.4205	1.49157	1.49349	1	1	1	1	1	1	1	1	1	0.122	0	12.1381	1
FALSE	High	Master Protein	A0A0P0X1R2	Os07g0110200 protein (Fragment) OS=Oryza sativa subsp. japonica GN=Os07g0110200 PE=4 SV=1	0	7.35184	4.81586	1	3	1	1	353	40.096	9.57	High	High	High	High	High	High	High	High	High	Phospho [S1378(100)]	1	1.07388	0.926973	1.00173	0.915835	0.946023	0.949841	1.02672	0.979572	2	2	2	2	2	2	2	2	2	0.016	0	28.8409	2
FALSE	High	Master Protein	B9G2A8	Auxin transport protein BIG OS=Oryza sativa subsp. japonica GN=Os09g0247700 PE=2 SV=1	0	7.35164	0.443102	2	16	2	1	4965	551.675	6.06	High	High	High	High	High	High	High	High	High	Phospho [S85(100)]	1	1.14493	1.19591	1.17764	1.22748	1.16591	1.16481	1.38881	1.43558	1	1	1	1	1	1	1	1	1	0.11	0	16.8289	1
FALSE	High	Master Protein	Q6EU15	Finger protein pcp1-like OS=Oryza sativa subsp. japonica GN=Os02g0672100 PE=4 SV=1	0	7.34814	2.43902	1	4	1	1	615	63.557	8.51	High	High	High	High	High	High	High	High	High	Phospho [S32(100); S36(100); S87(100)]	1	0.986585	1.0128	1.12487	1.07266	1.07307	1.10041	1.13717	1.19672	2	2	2	2	2	2	2	2	2	0.086	0	18.1512	2
FALSE	High	Master Protein	Q6K3D4	Os02g0281000 protein OS=Oryza sativa subsp. japonica GN=P0669G10.18-1 PE=3 SV=1	0	7.33799	3.13076	2	7	2	1	1086	120.848	5.27	High	High	High	High	High	High	High	High	High	Phospho [S345(100); S359(100)]	1	1.13579	0.896455	1.2568	1.09679	0.981205	1.33527	1.35327	1.38129	2	2	2	2	2	2	2	2	2	0.202	0	13.7111	2
FALSE	High	Master Protein	Q6ZI44	Serine/threonine-protein kinase SAPK6 OS=Oryza sativa subsp. japonica GN=SAPK6 PE=2 SV=1	0	7.33666	9.58904	2	4	2	1	365	41.777	6.04	High	High	High	High	High	High	High	High	High	Phospho [S43(100); S45(100)]	1	1.03328	1.00708	1.07014	1.01033	1.01052	1.15723	1.17559	1.15691	1	1	1	1	1	1	1	1	1	0.425	0	9.06105	1
FALSE	High	Master Protein	Q69NE0	BRI1-KD interacting protein 120 OS=Oryza sativa subsp. japonica GN=Os09g0410300 PE=4 SV=1	0	7.27152	4.01786	1	4	1	1	224	25.268	9.19	High	High	High	High	High	High	High	High	High	Phospho [S467(99.3)]	1	1.03328	0.96512	1.07307	0.883666	0.984137	1.32106	1.22265	1.62257	1	1	1	1	1	1	1	1	1	0.089	0	10.6407	1
FALSE	High	Master Protein	Q2QLM6	Associated with HOX family protein, expressed OS=Oryza sativa subsp. japonica GN=Os12g0636200 PE=2 SV=1	0	7.26576	2.93663	1	6	1	1	647	72.053	6.19	High	High	High	High	High	High	High	High	High	Phospho [S150(100); T154(98.8)]	1	1.19872	1.05286	1.28612	1.41748	1.0203	1.20932	1.09779	1.14726	1	1	1	1	1	1	1	1	1	0.311	0	21.7487	1
FALSE	High	Master Protein	Q852C9	Nitrate-induced NOI protein, expressed OS=Oryza sativa subsp. japonica GN=Os03g0848600 PE=4 SV=1	0	7.26503	6.61157	1	11	1	1	242	27.091	9.38	High	High	High	High	High	High	High	High	High	Phospho [S136(100)]	1	1.09824	0.967981	0.815065	1.00229	0.968501	0.987721	1.01327	1.07005	1	1	1	1	1	1	1	1	1	0.07	0	4.84434	1
FALSE	High	Master Protein	Q10F62	Os03g0679700 protein OS=Oryza sativa subsp. japonica GN=LOC_Os03g47610 PE=2 SV=1	0	7.26328	2.50391	1	1	1	1	639	71.251	6.43	High	High	High	High	High	High	High	High	High	Phospho [S242(100)]	1	0.966285	0.934602	0.975342	1.05959	1.0418	2.50766	2.46739	2.18353	3	3	3	3	3	3	3	3	3	0.701	0	26.7849	3
FALSE	High	Master Protein	Q5NAL3	Os01g0246700 protein OS=Oryza sativa subsp. japonica GN=Os01g0246700 PE=4 SV=1	0	7.25875	2.90557	3	16	3	1	413	42.123	5.34	High	High	High	High	High	High	High	High	High	Phospho [S181(100); S182(100)]	1	1.09824	1.01757	1.01346	0.986207	0.938204	1.23773	1.12852	1.11107	2	2	2	2	2	2	2	2	2	0.292	0	14.298	2
FALSE	High	Master Protein	Q33B74	GTP-binding protein, putative, expressed OS=Oryza sativa subsp. japonica GN=LOC_Os10g04580 PE=2 SV=1	0	7.25723	3.49854	2	5	2	1	343	37.284	9.26	High	High	High	High	High	High	High	High	High	Phospho [S129(100)]	1	1.15711	0.99373	0.924522	0.98118	1.06428	1.36084	1.06898	1.10986	1	1	1	1	1	1	1	1	1	0.245	0	2.38358	1
FALSE	High	Master Protein	Q69JZ7	Protein XAP5 CIRCADIAN TIMEKEEPER OS=Oryza sativa subsp. japonica GN=XCT PE=2 SV=1	0	7.24478	6.90691	1	2	1	1	333	39.24	6.71	High	High	High	High	High	High	High	High	High	Phospho [S252(100); S254(100)]	1	1.13275	0.995637	1.07307	0.975149	0.909863	1.18943	1.07378	1.14846	2	2	2	2	2	2	2	2	2	0.202	0	41.4663	2
FALSE	High	Master Protein	A0A0P0WQD6	Os05g0545600 protein OS=Oryza sativa subsp. japonica GN=Os05g0545600 PE=4 SV=1	0	7.23834	2.1322	2	12	2	1	469	54.415	10.56	High	High	High	High	High	High	High	High	High	Phospho [S513(99.3)]	1	1.00892	0.807763	0.857089	0.684615	0.823861	1.47069	1.31005	1.4778	1	1	1	1	1	1	1	1	1	0.064	0	8.03576	1
FALSE	High	Master Protein	Q2QXD6	Os12g0160900 protein OS=Oryza sativa subsp. japonica GN=Os12g0160900 PE=2 SV=1	0	7.22871	2.20318	1	2	1	1	817	93.347	5.43	High	High	High	High	High	High	High	High	High	Phospho [S201(100); S203(100)]	1	1.03125	0.883104	0.942114	0.86557	0.868816	0.929007	0.912424	1.04351	2	2	2	2	2	2	2	2	2	0.425	0	14.5424	1
FALSE	High	Master Protein	Q5VMK2	Os06g0151200 protein OS=Oryza sativa subsp. japonica GN=Os06g0151200 PE=2 SV=1	0	7.20638	3.66667	1	7	1	1	300	32.631	5.22	High	High	High	High	High	High	High	High	High	Phospho [S702(99.2)]	1	0.919595	0.941278	1.00662	0.818321	0.807247	1.08337	1.04401	1.08211	1	1	1	1	1	1	1	1	1	0.049	0	10.5207	1
FALSE	High	Master Protein	Q0J0G6	Os09g0510700 protein OS=Oryza sativa subsp. japonica GN=Os09g0510700 PE=4 SV=1	0	7.19579	2.03349	1	3	1	1	836	93.623	7.21	High	High	High	High	High	High	High	High	High	Phospho [S357(100)]	1	1.13376	0.921251	0.930386	0.810278	1.11412	0.914802	1.22841	0.914428	2	2	2	2	2	2	2	2	2	0.259	0	5.71858	1
FALSE	High	Master Protein	Q6PU50	Os02g0759400 protein OS=Oryza sativa subsp. japonica GN=Os02g0759400 PE=2 SV=1	0	7.16957	2.746	1	2	1	1	437	46.614	8.65	High	High	High	High	High	High	High	High	High	Phospho [S244(100)]	1	1.03328	0.826837	0.922568	0.763029	0.80236	0.683734	0.693442	0.700901	1	1	1	1	1	1	1	1	1	0.334	0	10.2002	1
FALSE	High	Master Protein	Q652Q6	Os09g0568000 protein OS=Oryza sativa subsp. japonica GN=Os09g0568000 PE=2 SV=1	0	7.15902	2.41758	1	5	1	1	455	50.785	7.52	High	High	High	High	High	High	High	High	High	Phospho [S140(99.3); S145(98.6)]	1	1.05662	1.12629	1.11509	0.756997	0.931363	1.08053	0.980616	1.10986	2	2	2	2	2	2	2	2	2	0.245	0	9.95169	2
FALSE	High	Master Protein	Q0JCS2	Os04g0452400 protein OS=Oryza sativa subsp. japonica GN=Os04g0452400 PE=2 SV=1	0	7.1499	4.35967	2	3	2	1	367	41.767	6.52	High	High	High	High	High	High	High	High	High	Phospho [S252(100)]	1	1.09621	1.07384	1.05353	0.956048	0.978273	1.41198	1.31965	1.42352	1	1	1	1	1	1	1	1	1	0.07	0	11.1301	1
FALSE	High	Master Protein	A0A0P0WB35	Os04g0454600 protein (Fragment) OS=Oryza sativa subsp. japonica GN=Os04g0454600 PE=4 SV=1	0	7.13194	2.79232	1	3	1	1	573	63.3	6.32	High	High	High	High	High	High	High	High	High	Phospho [S13(100); S16(100); S48(98.2)]	1	1.35706	0.872613	0.843407	0.876628	0.765223	1.0095	1.05841	0.878237	2	2	2	2	2	2	2	2	2	0.389	0	7.39985	2
FALSE	High	Master Protein	Q8RZB7	Os01g0949300 protein OS=Oryza sativa subsp. japonica GN=Os01g0949300 PE=2 SV=1	0	7.11943	15.6863	2	6	2	1	204	21.233	4.81	High	High	High	High	High	High	High	High	High	Phospho [S209(100); S214(100); S215(100)]	1	1.02617	0.979425	0.966546	0.884671	0.872725	1.53982	1.35999	1.66479	2	2	2	2	2	2	2	2	2	0.222	0	18.8692	1
FALSE	High	Master Protein	Q653S1	Os09g0558200 protein OS=Oryza sativa subsp. japonica GN=Os09g0558200 PE=2 SV=1	0	7.10578	3.57143	1	7	1	1	336	36.313	7.03	High	High	High	High	High	High	High	High	High	Phospho [S259(100)]	1	0.8658	0.693322	0.669448	0.730859	0.697789	0.576723	0.779882	0.588708	2	2	2	2	2	2	2	2	2	0.199	0	36.3138	2
FALSE	High	Master Protein	Q652J5	Deoxyribodipyrimidine photolyase family protein-like OS=Oryza sativa subsp. japonica GN=Os09g0532700 PE=4 SV=1	0	7.09783	1.29496	2	14	2	1	695	76.756	6.67	High	High	High	High	High	High	High	High	High	Phospho [S288(100); S546(99.1)]	1	1.32763	1.02997	1.17178	1.03547	0.931363	1.19417	1.21304	1.33545	2	2	2	2	2	2	2	2	2	0.155	0	7.77448	2
FALSE	High	Master Protein	A0A0P0WRX8	Os06g0105600 protein (Fragment) OS=Oryza sativa subsp. japonica GN=Os06g0105600 PE=4 SV=1	0	7.08492	4.6281	2	4	2	1	605	65.457	7.05	High	High	High	High	High	High	High	High	High	Phospho [S66(100)]	1	1.01704	0.949861	0.99391	1.03044	1.18351	1.17239	1.14485	1.3065	1	1	1	1	1	1	1	1	1	0.129	0	17.4142	1
FALSE	High	Master Protein	B7ERE7	Os09g0555700 protein OS=Oryza sativa subsp. japonica GN=Os09g0555700 PE=2 SV=1	0	7.07407	3.36449	1	4	1	1	535	54.858	9.1	High	High	High	High	High	High	High	High	High	Phospho [S46(100); S402(100)]	1	1.04038	1.12057	0.948955	0.851496	1.07991	1.06822	1.21208	1.14243	2	2	2	2	2	2	2	2	2	0.233	0	13.0638	2
FALSE	High	Master Protein	A0A0N7KHE3	Os03g0397700 protein OS=Oryza sativa subsp. japonica GN=Os03g0397700 PE=4 SV=1	0	7.07016	6.0241	2	7	2	1	415	46.287	6.42	High	High	High	High	High	High	High	High	High	Phospho [S36(100)]	1	1.14493	0.979425	1.09066	0.949011	0.978273	1.04454	1.03056	1.01818	2	2	2	2	2	2	2	2	2	0.155	0	13.9137	1
FALSE	High	Master Protein	Q0J0L4	Uridine kinase OS=Oryza sativa subsp. japonica GN=Os09g0505800 PE=2 SV=1	0	7.04784	2.82258	1	10	1	1	496	55.008	7.12	High	High	High	High	High	High	High	High	High	Phospho [S129(99.3); S250(100)]	1	1.09316	0.953676	1.05646	1.0043	0.990001	1.06443	1.01327	1.13399	2	2	2	2	2	2	2	2	2	0.638	0	17.4206	2
FALSE	High	Master Protein	Q84JT9	Os08g0516900 protein OS=Oryza sativa subsp. japonica GN=P0686C03.145 PE=4 SV=1	0	7.02323	10.3448	2	9	2	1	261	27.603	4.65	High	High	High	High	High	High	High	High	High	Phospho [S400(98.7); S420(100)]	1	1.06982	1.01376	1.12389	0.963085	1.04278	1.28697	1.25915	1.41145	2	2	2	2	2	2	2	2	2	0.125	0	3.98043	2
FALSE	High	Master Protein	A0A0P0X662	Os07g0507700 protein (Fragment) OS=Oryza sativa subsp. japonica GN=Os07g0507700 PE=4 SV=1	0	6.9893	6.3228	2	4	2	1	601	66.767	9.07	High	High	High	High	High	High	High	High	High	Phospho [S626(100); S633(100)]	1	0.89016	0.828744	1.27537	1.10785	1.39167	1.34379	1.52615	1.49831	1	1	1	1	1	1	1	1	1	0.059	0	3.98138	1
FALSE	High	Master Protein	Q5W770	TATA box-binding protein-associated factor RNA polymerase I subunit B OS=Oryza sativa subsp. japonica GN=Os05g0352700 PE=3 SV=2	0	6.96019	3.3123	1	1	1	1	634	70.494	6.13	High	High	High	High	High	High	High	High	High	Phospho [S183(100)]	1	1.08504	0.946046	0.870771	0.889697	0.913772	0.924272	0.970051	0.922873	2	2	2	2	2	2	2	2	2	0.438	0	6.75395	2
FALSE	High	Master Protein	Q5N8U8	Os01g0900800 protein OS=Oryza sativa subsp. japonica GN=P0035F12.17-1 PE=2 SV=1	0	6.95913	5.16796	2	5	2	1	387	40.672	8.03	High	High	High	High	High	High	High	High	High	Phospho [S20(100)]	1	0.927715	1.01757	1.01932	0.933931	0.930386	1.19701	1.12276	1.42834	1	1	1	1	1	1	1	1	1	0.059	0	8.39013	1
FALSE	High	Master Protein	Q5JN42	Phosphatidylserine decarboxylase proenzyme 2 OS=Oryza sativa subsp. japonica GN=PSD2 PE=3 SV=3	0	6.95624	3.36538	1	2	1	1	624	69.011	5.72	High	High	High	High	High	High	High	High	High	Phospho [S260(100)]	1	1.11549	0.959398	1.12975	0.810278	0.927454	1.14398	1.05553	1.18707	1	1	1	1	1	1	1	1	1	0.166	0	12.823	1
FALSE	High	Master Protein	Q7XB62	Os07g0204500 protein OS=Oryza sativa subsp. japonica GN=Os07g0204500 PE=3 SV=1	0	6.94962	4.2623	1	5	1	1	305	32.642	5.3	High	High	High	High	High	High	High	High	High	Phospho [S243(100)]	1	1.15305	0.749589	0.917681	0.806257	0.829724	0.820102	0.782764	0.801029	1	1	1	1	1	1	1	1	1	0.133	0	15.808	1
FALSE	High	Master Protein	Q6K270	Nodulation receptor kinase-like protein OS=Oryza sativa subsp. japonica GN=Os09g0123300 PE=3 SV=1	0	6.94192	1.90114	1	6	1	1	526	59.031	7.31	High	High	High	High	High	High	High	High	High	Phospho [S465(100); S477(100)]	1	0.830274	0.916482	1.06525	0.966101	1.37115	1.23489	1.16406	1.32821	2	2	2	2	2	2	2	2	2	0.166	0	3.47028	1
FALSE	High	Master Protein	Q0J9B4	Os04g0662800 protein OS=Oryza sativa subsp. japonica GN=Os04g0662800 PE=4 SV=1	0	6.91461	4.37158	1	2	1	1	549	58.372	8.47	High	High	High	High	High	High	High	High	High	Phospho [S92(100)]	1	0.921625	0.61226	1.03593	0.682604	0.632311	0.834307	1.00463	1.21723	1	1	1	1	1	1	1	1	1	0.11	0	4.53505	1
FALSE	High	Master Protein	Q5VQG6	Os01g0169900 protein OS=Oryza sativa subsp. japonica GN=Os01g0169900 PE=2 SV=1	0	6.91328	4.31034	1	1	1	1	580	61.252	6.43	High	High	High	High	High	High	High	High	High	Phospho [S278(100); S280(100)]	1	1.03632	0.922204	1.16591	1.44463	1.04766	1.32012	1.08626	1.24015	1	1	1	1	1	1	1	1	1	0.389	0	8.34095	1
FALSE	High	Master Protein	Q84QC0	ASC1-like protein 3 OS=Oryza sativa subsp. japonica GN=Os03g0264000 PE=2 SV=1	0	6.9131	5.28169	1	5	1	1	284	33.273	8.37	High	High	High	High	High	High	High	High	High	Phospho [S90(100)]	1	1.11854	0.967027	1.01346	0.968111	0.978273	1.43755	1.30717	1.48383	2	2	2	2	2	2	2	2	2	0.194	0	9.43141	2
FALSE	High	Master Protein	A0A0P0YBA4	Os12g0561200 protein (Fragment) OS=Oryza sativa subsp. japonica GN=Os12g0561200 PE=4 SV=1	0	6.90322	9.21053	2	7	2	1	456	49.963	9.74	High	High	High	High	High	High	High	High	High	Phospho [T79(100)]	1	1.19974	0.960351	1.14246	1.02139	0.966546	1.8315	1.45219	1.93864	1	1	1	1	1	1	1	1	1	0.212	0	8.17914	1
FALSE	High	Master Protein	A0A0P0XAR4	Os08g0103000 protein (Fragment) OS=Oryza sativa subsp. japonica GN=Os08g0103000 PE=4 SV=1	0	6.87778	7.92079	1	2	1	1	202	23.081	9.16	High	High	High	High	High	High	High	High	High	Phospho [S499(100)]	1	1.13985	1.02997	0.881521	0.887687	0.875657	1.04265	0.996943	1.11107	1	1	1	1	1	1	1	1	1	0.072	0	13.3647	1
FALSE	High	Master Protein	Q10LH5	Nucleolar protein NOP5, putative, expressed OS=Oryza sativa subsp. japonica GN=Os03g0350100 PE=2 SV=1	0	6.87778	2.8169	1	4	1	1	568	62.42	9.03	High	High	High	High	High	High	High	High	High	Phospho [S42(99.1)]	1	1.10027	0.947	1.01052	0.916841	0.98316	1.28508	1.24954	1.6865	2	2	2	2	2	2	2	2	2	0.425	0	3.5217	2
FALSE	High	Master Protein	A0A0P0XAL4	Os08g0100700 protein OS=Oryza sativa subsp. japonica GN=Os08g0100700 PE=4 SV=1	0	6.87745	18.8312	2	2	2	1	154	16.578	9.99	High	High	High	High	High	High	High	High	High	Phospho [S167(100)]	1	1.29007	0.988962	1.08382	0.977159	1.03789	1.07863	1.05457	1.14484	1	1	1	1	1	1	1	1	1	0.05	0	8.14598	1
FALSE	High	Master Protein	Q6ZAQ9	Os08g0187700 protein OS=Oryza sativa subsp. japonica GN=Os08g0187700 PE=2 SV=1	0	6.85886	1.44181	1	2	1	1	971	106.683	6.74	High	High	High	High	High	High	High	High	High	Phospho [S313(100)]	1	0.93685	1.0109	0.942114	1.03949	1.07796	1.25193	1.26107	1.2872	1	1	1	1	1	1	1	1	1	0.077	0	8.25996	1
FALSE	High	Master Protein	Q6EP35	Os02g0580900 protein OS=Oryza sativa subsp. japonica GN=B1267B06.37-1 PE=2 SV=1	0	6.85294	2.29885	1	2	1	1	609	64.634	8.69	High	High	High	High	High	High	High	High	High	Phospho [S53(99.2)]	1	0.978465	0.745774	0.87468	0.675567	0.823861	1.20553	1.18039	1.58879	1	1	1	1	1	1	1	1	1	0.08	0	4.10881	1
FALSE	High	Master Protein	Q5ZA54	Os06g0298400 protein OS=Oryza sativa subsp. japonica GN=Os06g0298400 PE=4 SV=1	0	6.85109	2.2093	1	1	1	1	860	92.865	4.65	High	High	High	High	High	High	High	High	High	Phospho [S330(100)]	1	0.899295	1.12629	0.920613	0.892713	1.00173	1.05496	1.04497	1.13278	2	2	2	2	2	2	2	2	2	0.096	0	8.77545	2
FALSE	High	Master Protein	Q0D6I0	Os07g0477500 protein OS=Oryza sativa subsp. japonica GN=Os07g0477500 PE=4 SV=1	0	6.81541	2.89673	2	6	2	1	794	89.639	7.49	High	High	High	High	High	High	High	High	High	Phospho [S369(99.5)]	1	1.30022	1.32084	1.20892	1.18425	0.847316	1.67619	1.22361	1.37647	1	1	1	1	1	1	1	1	1	0.105	0	3.37623	1
FALSE	High	Master Protein	Q6ZIG4	Os02g0186500 protein OS=Oryza sativa subsp. japonica GN=Os02g0186500 PE=2 SV=1	0	6.78015	4.77454	1	2	1	1	377	42.026	6.99	High	High	High	High	High	High	High	High	High	Phospho [S134(100)]	1	1.12463	1.00422	0.952864	0.813294	0.790633	1.08147	1.16886	1.05195	1	1	1	1	1	1	1	1	1	0.04	0	8.44757	1
FALSE	High	Master Protein	Q6YSJ5	Protein argonaute 16 OS=Oryza sativa subsp. japonica GN=AGO16 PE=2 SV=2	0	6.76447	1.812	1	2	1	1	883	98.699	9	High	High	High	High	High	High	High	High	High	Phospho [S349(99.5)]	1	1.04343	0.762941	1.00271	0.802236	0.712449	0.79548	0.92491	0.792585	1	1	1	1	1	1	1	1	1	0.101	0	14.569	1
FALSE	High	Master Protein	Q2R1V8	GDP-mannose 3,5-epimerase 2 OS=Oryza sativa subsp. japonica GN=GME-2 PE=2 SV=2	0	6.7582	3.50404	1	7	1	1	371	42.105	6.09	High	High	High	High	High	High	High	High	High	Phospho [S56(100)]	1	0.9673	0.879289	0.801383	0.879644	0.801383	1.19701	1.13333	1.22808	1	1	1	1	1	1	1	1	1	0.05	0	3.76836	1
FALSE	High	Master Protein	Q10A81	Expressed protein OS=Oryza sativa subsp. japonica GN=LOC_Os03g64400 PE=4 SV=1	0	6.74112	2.61438	1	1	1	1	918	99.858	4.83	High	High	High	High	High	High	High	High	High	Phospho [S108(100)]	1	1.24846	1.11771	1.28124	1.22748	1.04864	1.4508	1.40417	1.61654	1	1	1	1	1	1	1	1	1	0.053	0	4.11769	1
FALSE	High	Master Protein	A0A0P0VK79	Os02g0550900 protein (Fragment) OS=Oryza sativa subsp. japonica GN=Os02g0550900 PE=4 SV=1	0	6.74088	2.40964	1	1	1	1	747	84.714	7.34	High	High	High	High	High	High	High	High	High	Phospho [S800(99)]	1	1.14391	0.935556	1.04082	0.885676	0.92159	0.839989	0.913384	0.913222	2	2	2	2	2	2	2	2	2	0.066	0	8.46184	2
FALSE	High	Master Protein	A0A0N7KJH4	Os04g0555600 protein (Fragment) OS=Oryza sativa subsp. japonica GN=Os04g0555600 PE=4 SV=1	0	6.69255	2.25681	2	5	2	1	1285	138.67	5.99	High	High	High	High	High	High	High	High	High	Phospho [S166(100); S298(100)]	1	0.823169	0.717164	0.816042	0.720806	0.714404	0.659112	0.637736	0.708139	2	2	2	2	2	2	2	2	2	0.08	0	15.6142	2
FALSE	High	Master Protein	A0A0P0VVK9	Os03g0255000 protein (Fragment) OS=Oryza sativa subsp. japonica GN=Os03g0255000 PE=4 SV=1	0	6.68109	1.88679	2	6	2	1	1007	114.333	6.28	High	High	High	High	High	High	High	High	High	Phospho [S421(100)]	1	0.88001	0.794412	1.03398	0.797209	0.806269	1.13072	1.13621	1.19431	2	2	2	2	2	2	2	2	2	0.101	0	5.12068	2
FALSE	High	Master Protein	Q7XAK8	Os07g0106100 protein OS=Oryza sativa subsp. japonica GN=P0617C02.123 PE=2 SV=1	0	6.67021	3.81078	2	2	2	1	761	83.166	6.55	High	High	High	High	High	High	High	High	High	Phospho [S137(100)]	1	1.11143	1.07289	1.05841	0.913825	0.836566	1.02939	1.03536	1.12313	2	2	2	2	2	2	2	2	2	0.105	0	6.73198	2
FALSE	High	Master Protein	A0A0P0VDV3	Os02g0114033 protein (Fragment) OS=Oryza sativa subsp. japonica GN=Os02g0114033 PE=4 SV=1	0	6.66117	1.38728	2	2	2	1	865	95.455	9.77	High	High	High	High	High	High	High	High	High	Phospho [S493(100)]	1	1.06576	0.921251	0.961659	0.976154	0.90009	1.21974	1.20632	1.34269	1	1	1	1	1	1	1	1	1	0.07	0	4.32656	1
FALSE	High	Master Protein	Q6K832	Lipase class 3 protein-like OS=Oryza sativa subsp. japonica GN=Os02g0780700 PE=2 SV=1	0	6.64724	2.58752	1	1	1	1	657	71.936	5.19	High	High	High	High	High	High	High	High	High	Phospho [T192(100); S195(99.6); S201(99.2); S205(99.2)]	1	1.18857	1.00136	1.0203	0.788161	0.795519	1.15723	1.08146	1.29685	2	2	2	2	2	2	2	2	2	0.389	0	16.9296	2
FALSE	High	Master Protein	Q7XTS1	OSJNBa0008M17.14 protein OS=Oryza sativa subsp. japonica GN=Os04g0616000 PE=4 SV=2	0	6.64146	5.76923	2	14	2	1	312	34.754	7.75	High	High	High	High	High	High	High	High	High	Phospho [S785(95.7); S786(95.7)]	1	0.810989	1.08528	1.32912	1.18928	0.84927	1.53035	1.27547	1.45126	2	2	2	2	2	2	2	2	2	0.155	0	4.19924	1
FALSE	High	Master Protein	A0A0P0VUJ4	Os03g0210800 protein (Fragment) OS=Oryza sativa subsp. japonica GN=Os03g0210800 PE=4 SV=1	0	6.62988	2.133	1	3	1	1	797	87.109	6.83	High	High	High	High	High	High	High	High	High	Phospho [S65(100)]	1	0.845499	0.848771	0.783792	0.871602	0.794542	0.931848	1.07762	0.7576	1	1	1	1	1	1	1	1	1	0.075	0	3.84313	1
FALSE	High	Master Protein	Q7XIM0	Os07g0161600 protein OS=Oryza sativa subsp. japonica GN=OJ1714_H10.135 PE=3 SV=1	0	6.62912	2.64085	1	1	1	1	568	62.58	5.92	High	High	High	High	High	High	High	High	High	Phospho [S57(100)]	1	0.96527	0.88215	0.918658	0.923878	0.851225	1.28508	1.20536	1.31736	2	2	2	2	2	2	2	2	2	0.212	0	11.4232	1
FALSE	High	Master Protein	Q5N6Y9	Os01g0901200 protein OS=Oryza sativa subsp. japonica GN=Os01g0901200 PE=3 SV=1	0	6.61393	3.0303	1	6	1	1	429	45.99	7.49	High	High	High	High	High	High	High	High	High	Phospho [S360(100); S364(99.4)]	1	1.05865	0.933649	1.01737	0.978165	0.947	1.07011	1.13813	1.18586	1	1	1	1	1	1	1	1	1	0.155	0	43.6358	1
FALSE	High	Master Protein	Q10K55	Expressed protein OS=Oryza sativa subsp. japonica GN=Os03g0395900 PE=2 SV=1	0	6.61378	2.25989	1	18	1	1	531	61.671	10.08	High	High	High	High	High	High	High	High	High	Phospho [S115(100)]	1	1.08707	1.02902	1.12194	1.06965	0.973387	1.26046	1.22841	1.2884	1	1	1	1	1	1	1	1	1	0.075	0	21.5373	1
FALSE	High	Master Protein	Q69M01	Os02g0191700 protein OS=Oryza sativa subsp. japonica GN=P0453H10.11 PE=4 SV=1	0	6.57154	2.35507	1	5	1	1	552	62.469	5.31	High	High	High	High	High	High	High	High	High	Phospho [S6(100); S8(100); S10(100); S21(100); S22(100); S180(100); S182(100)]	1	1.0891	1.10722	1.11705	1.06965	1.09653	1.44323	1.37248	1.55139	3	3	3	3	3	3	3	3	3	0.778	0	12.4649	3
FALSE	High	Master Protein	Q7XI49	Os07g0633200 protein OS=Oryza sativa subsp. japonica GN=P0519E12.127 PE=2 SV=1	0	6.5512	13.615	3	6	3	1	213	24.805	10.68	High	High	High	High	High	High	High	High	High	Phospho [S258(100)]	1	1.15508	1.07289	1.20892	1.07266	1.07307	1.29076	1.35711	1.24135	1	1	1	1	1	1	1	1	1	0.413	0	7.37163	3
FALSE	High	Master Protein	Q6EUP4	14-3-3-like protein GF14-E OS=Oryza sativa subsp. japonica GN=GF14E PE=2 SV=1	0	6.52389	9.16031	3	3	1	1	262	29.674	4.77	High	High	High	High	High	High	High	High	High	Phospho [S337(99.4)]	1	1.09621	0.902177	0.91084	0.917846	0.850248	1.37883	1.25915	1.61171	2	2	2	2	2	2	2	2	2	0.369	0	4.18617	1
FALSE	High	Master Protein	A0A0P0WSW0	Os06g0143900 protein (Fragment) OS=Oryza sativa subsp. japonica GN=Os06g0143900 PE=4 SV=1	0	6.5203	4.73373	1	5	1	1	338	37.691	4.4	High	High	High	High	High	High	High	High	High	Phospho [S355(100)]	1	1.0008	1.09196	1.02127	1.10081	0.977296	1.22163	1.17367	1.26066	1	1	1	1	1	1	1	1	1	0.072	0	4.36414	1
FALSE	High	Master Protein	Q0JKB4	ATP synthase subunit beta OS=Oryza sativa subsp. japonica GN=Os01g0685800 PE=3 SV=1	0	6.50515	3.7702	1	1	1	1	557	59.426	6.55	High	High	High	High	High	High	High	High	High	Phospho [S288(99.5)]	1	0.97948	1.14632	1.26169	1.24658	1.19719	4.71511	5.07404	4.78446	1	1	1	1	1	1	1	1	1	0.166	0	14.5379	1
FALSE	High	Master Protein	Q0DUA4	Os03g0197200 protein (Fragment) OS=Oryza sativa subsp. japonica GN=Os03g0197200 PE=3 SV=1	0	6.49512	5.42373	1	11	1	1	295	31.375	5.82	High	High	High	High	High	High	High	High	High	Phospho [S197(100)]	1	0.92467	1.07193	1.11412	0.948005	0.945045	0.992456	1.03344	1.03024	1	1	1	1	1	1	1	1	1	0.179	0	8.51004	1
FALSE	High	Master Protein	A0A0P0Y445	Os11g0602500 protein (Fragment) OS=Oryza sativa subsp. japonica GN=Os11g0602500 PE=3 SV=1	0	6.48122	7.17703	1	2	1	1	209	24.134	9.99	High	High	High	High	High	High	High	High	High	Phospho [S207(100)]	1	1.04444	0.850679	0.871748	0.905782	0.920613	1.11841	1.05745	1.20396	1	1	1	1	1	1	1	1	1	0.11	0	4.23334	1
FALSE	High	Master Protein	Q6ZL20	Os07g0573300 protein OS=Oryza sativa subsp. japonica GN=OJ1699_E05.17 PE=4 SV=1	0	6.47978	5.02901	1	1	1	1	517	54.816	6.4	High	High	High	High	High	High	High	High	High	Phospho [S1077(100)]	1	0.998765	1.12343	0.956773	0.881655	1.09848	0.90912	1.00367	0.813093	1	1	1	1	1	1	1	1	1	0.022	0	20.2645	1
FALSE	High	Master Protein	A0A0P0W1J8	Os03g0686300 protein (Fragment) OS=Oryza sativa subsp. japonica GN=Os03g0686300 PE=3 SV=1	0	6.47521	0.711054	1	5	1	1	1547	174.913	8.46	High	High	High	High	High	High	High	High	High	Phospho [S296(100); S299(100)]	1	0.986585	0.943185	1.00368	0.978165	1.10239	1.1203	1.16982	1.22688	2	2	2	2	2	2	2	2	2	0.172	0	9.15049	1
FALSE	High	Master Protein	Q8H085	Os03g0148700 protein OS=Oryza sativa subsp. japonica GN=LOC_Os03g05470 PE=2 SV=1	0	6.40749	3.25581	1	3	1	1	430	47.536	8.69	High	High	High	High	High	High	High	High	High	Phospho [T59(100); T62(100)]	1	0.843469	0.995637	0.699744	0.883666	0.871748	0.955523	1.04208	1.18827	1	1	1	1	1	1	1	1	1	0.086	0	9.50448	1
FALSE	High	Master Protein	Q6ZFT8	DNA-binding protein-like OS=Oryza sativa subsp. japonica GN=Os02g0714300 PE=4 SV=1	0	6.40307	3.08642	1	3	1	1	486	52.871	4.63	High	High	High	High	High	High	High	High	High	Phospho [S88(100)]	1	1.10027	1.26076	1.35258	1.21944	0.956773	1.54835	1.33502	1.4211	2	2	2	2	2	2	2	2	2	0.425	0	8.25918	2
FALSE	High	Master Protein	Q5VM82	Zinc-finger homeodomain protein 5 OS=Oryza sativa subsp. japonica GN=ZHD5 PE=3 SV=1	0	6.35643	14.2241	2	9	2	1	232	25.367	8.69	High	High	High	High	High	High	High	High	High	Phospho [S680(100); S684(100)]	1	1.14594	1.09768	1.17178	1.05557	1.00564	1.22731	1.17751	1.14364	1	1	1	1	1	1	1	1	1	0.059	0	7.73976	1
FALSE	High	Master Protein	Q7XHL0	Os07g0540100 protein OS=Oryza sativa subsp. japonica GN=P0458H05.109 PE=2 SV=1	0	6.34573	2.44253	1	2	1	1	696	74.727	7.84	High	High	High	High	High	High	High	High	High	Phospho [S299(100)]	1	1.21801	0.875474	1.00075	0.846469	0.875657	1.27277	1.04593	1.25945	1	1	1	1	1	1	1	1	1	0.054	0	3.80437	1
FALSE	High	Master Protein	Q0DEQ5	Os06g0140800 protein OS=Oryza sativa subsp. japonica GN=Os06g0140800 PE=2 SV=1	0	6.33133	2.48139	1	1	1	1	806	89.992	6.61	High	High	High	High	High	High	High	High	High	Phospho [S10(100)]	1	1.17944	0.970842	0.973387	0.854512	0.858066	1.07011	1.01711	1.0423	2	2	2	2	2	2	2	2	2	0.125	0	11.6884	1
FALSE	High	Master Protein	Q6YV21	Os02g0708200 protein OS=Oryza sativa subsp. japonica GN=Os02g0708200 PE=2 SV=1	0	6.30868	1.38037	1	4	1	1	652	73.49	7.8	High	High	High	High	High	High	High	High	High	Phospho [S668(100); S707(100)]	1	1.04749	1.06812	1.05743	0.963085	1.02518	1.32959	1.32926	1.35717	2	2	2	2	2	2	2	2	2	0.158	0	11.7265	2
FALSE	High	Master Protein	Q5N8K0	Gene suppressor-of-white-apricot protein-like OS=Oryza sativa subsp. japonica GN=OJ1116_H09.32-1 PE=4 SV=1	0	6.29584	3.07868	2	5	2	1	877	96.492	6.98	High	High	High	High	High	High	High	High	High	Phospho [S72(100); S319(100)]	1	1.13275	0.859262	1.00173	0.982186	0.810179	0.930901	1.0296	0.90719	2	2	2	2	2	2	2	2	2	0.202	0	10.3778	2
FALSE	High	Master Protein	Q69K57	Os06g0199200 protein OS=Oryza sativa subsp. japonica GN=B1172G12.23-1 PE=2 SV=1	0	6.28565	4.33145	2	4	2	1	531	57.981	5.94	High	High	High	High	High	High	High	High	High	Phospho [S580(100)]	1	1.18248	0.962259	1.06037	1.09076	1.17569	1.769	1.43203	2.27642	1	1	1	1	1	1	1	1	1	0.053	0	3.92193	1
FALSE	High	Master Protein	Q10EK0	Os03g0767600 protein OS=Oryza sativa subsp. japonica GN=Os03g0767600 PE=4 SV=1	0	6.2772	3.80673	1	1	1	1	683	74.571	6.05	High	High	High	High	High	High	High	High	High	Phospho [S152(100)]	1	1.11448	0.86403	0.865884	0.860544	0.867839	1.11462	1.14773	1.38612	1	1	1	1	1	1	1	1	1	0.058	0	6.17757	1
FALSE	High	Master Protein	Q94DI0	Os01g0970900 protein OS=Oryza sativa subsp. japonica GN=Os01g0970900 PE=2 SV=1	0	6.24695	2.96684	1	4	1	1	573	64.069	6.81	High	High	High	High	High	High	High	High	High	Phospho [S16(100)]	1	1.15203	1.04427	1.02421	1.06362	1.04864	0.96594	0.923949	1.10865	1	1	1	1	1	1	1	1	1	0.086	0	4.33452	1
FALSE	High	Master Protein	Q2QXB1	Expressed protein OS=Oryza sativa subsp. japonica GN=Os12g0163500 PE=2 SV=1	0	6.23642	3.00926	1	2	1	1	432	48.743	6.61	High	High	High	High	High	High	High	High	High	Phospho [S228(99.6)]	1	1.4271	1.02997	0.635243	0.800225	0.689971	0.753812	0.630053	0.671948	1	1	1	1	1	1	1	1	1	0.212	0	4.33846	1
FALSE	High	Master Protein	A0A0P0WTV3	Os06g0182100 protein OS=Oryza sativa subsp. japonica GN=Os06g0182100 PE=4 SV=1	0	6.23003	4.58015	1	1	1	1	262	27.019	10.42	High	High	High	High	High	High	High	High	High	Phospho [S15(100)]	1	1.10839	0.937463	1.10044	1.11991	0.990978	1.19511	1.10067	1.18707	1	1	1	1	1	1	1	1	1	0.075	0	26.3527	1
FALSE	High	Master Protein	Q6EUD7	Os02g0244700 protein OS=Oryza sativa subsp. japonica GN=Os02g0244700 PE=2 SV=1	0	6.22815	0.929752	1	10	1	1	968	109.863	6.23	High	High	High	High	High	High	High	High	High	Phospho [S575(100); S593(100); S597(98.8)]	1	0.998765	0.984193	0.903022	0.864565	0.81702	1.00477	0.980616	1.00732	2	2	2	2	2	2	2	2	2	0.116	0	20.8647	2
FALSE	High	Master Protein	Q5TKI6	Os05g0430300 protein OS=Oryza sativa subsp. japonica GN=Os05g0430300 PE=2 SV=1	0	6.18946	3.28125	2	9	2	1	640	71.065	9.32	High	High	High	High	High	High	High	High	High	Phospho [S383(100)]	1	1.12158	1.03474	1.07893	1.03145	1.00075	1.27371	1.117	1.26789	1	1	1	1	1	1	1	1	1	0.049	0	14.3131	1
FALSE	High	Master Protein	A0A0P0X610	Os07g0455100 protein OS=Oryza sativa subsp. japonica GN=Os07g0455100 PE=4 SV=1	0	6.14448	1.44928	1	5	1	1	897	98.648	5.44	High	High	High	High	High	High	High	High	High	Phospho [S10(100)]	1	1.0485	1.0376	1.11412	0.988218	1.20305	0.93753	0.957565	0.949413	1	1	1	1	1	1	1	1	1	0.778	0	8.18538	1
FALSE	High	Master Protein	P50156	Probable aquaporin TIP1-1 OS=Oryza sativa subsp. japonica GN=TIP1-1 PE=2 SV=1	0	6.14412	6.8	1	2	1	1	250	25.683	6.51	High	High	High	High	High	High	High	High	High	Phospho [S67(100); S73(99.3)]	1	1.17639	1.13774	1.19914	1.18526	0.888362	1.51425	1.56073	1.46695	1	1	1	1	1	1	1	1	1	0.129	0	8.15294	1
FALSE	High	Master Protein	Q69P90	Os09g0439600 protein OS=Oryza sativa subsp. japonica GN=Os09g0439600 PE=4 SV=1	0	6.14322	2.03762	1	3	1	1	638	69.974	6.55	High	High	High	High	High	High	High	High	High	Phospho [S13(100)]	1	1.15203	0.78869	0.883476	0.773082	0.592241	0.531267	0.579149	0.390864	1	1	1	1	1	1	1	1	1	0.105	0	4.27514	1
FALSE	High	Master Protein	B7E4J4	Os05g0382600 protein OS=Oryza sativa subsp. japonica GN=Os05g0382600 PE=2 SV=1	0	6.10353	6.58307	1	1	1	1	319	35.347	6.96	High	High	High	High	High	High	High	High	High	Phospho [S464(100)]	1	1.24135	0.979425	1.31349	1.10081	1.02421	1.28413	1.22169	1.40542	2	2	2	2	2	2	2	2	2	0.212	0	28.2546	1
FALSE	High	Master Protein	Q7XDY9	Rubisco accumulation factor 1, chloroplastic OS=Oryza sativa subsp. japonica GN=RAF1 PE=2 SV=1	0	6.08899	2.55864	1	15	1	1	469	51.528	5.62	High	High	High	High	High	High	High	High	High	Phospho [S386(98.8)]	1	1.06474	0.839235	0.941136	1.03346	0.912795	1.04549	0.996943	1.1931	2	2	2	2	2	2	2	2	2	0.202	0	5.63377	2
FALSE	High	Master Protein	Q0JGG6	Os01g0924600 protein (Fragment) OS=Oryza sativa subsp. japonica GN=Os01g0924600 PE=4 SV=1	0	6.07779	6.57895	2	4	2	1	456	48.664	7.91	High	High	High	High	High	High	High	High	High	Phospho [S150(99.2)]	1	1.21598	0.949861	1.21282	1.09981	0.967523	1.47732	1.47813	1.75165	1	1	1	1	1	1	1	1	1	0.155	0	6.20482	1
FALSE	High	Master Protein	Q5JJI4	Probable mitochondrial import receptor subunit TOM20 OS=Oryza sativa subsp. japonica GN=TOM20 PE=2 SV=1	0	6.0735	8.41584	1	4	1	1	202	22.589	5.64	High	High	High	High	High	High	High	High	High	Phospho [S166(100)]	1	0.945985	0.8173	1.01932	0.845464	0.865884	1.09947	1.13621	1.38612	3	3	3	3	3	3	3	3	3	0.158	0	7.93248	3
FALSE	High	Master Protein	Q6Z246	Os08g0480100 protein OS=Oryza sativa subsp. japonica GN=Os08g0480100 PE=2 SV=1	0	6.06152	2.40385	3	4	3	1	624	68.664	7.96	High	High	High	High	High	High	High	High	High	Phospho [S991(100)]	1	1.02719	0.67711	0.868816	0.771071	0.793564	0.633543	0.751069	0.762425	1	1	1	1	1	1	1	1	1	0.047	0	12.8346	1
FALSE	High	Master Protein	Q7XTP6	OSJNBa0093O08.1 protein OS=Oryza sativa subsp. japonica GN=OSJNBa0093O08.1 PE=4 SV=2	0	6.01859	1.17073	1	4	1	1	1025	111.533	7.4	High	High	High	High	High	High	High	High	High	Phospho [S45(100); S48(100)]	1	0.856665	0.956537	0.915727	1.03446	0.948955	0.904385	1.21592	1.1364	1	1	1	1	1	1	1	1	1	0.062	0	4.05846	1
FALSE	High	Master Protein	A0A0P0WHC2	Os05g0124000 protein (Fragment) OS=Oryza sativa subsp. japonica GN=Os05g0124000 PE=4 SV=1	0	5.97634	2.5641	1	1	1	1	585	65.886	9.13	High	High	High	High	High	High	High	High	High	Phospho [S61(100)]	1	1.10331	1.0519	1.11998	1.14404	1.08871	1.37504	1.34655	1.31012	1	1	1	1	1	1	1	1	1	0.389	0	14.284	1
FALSE	High	Master Protein	Q94DS3	Os01g0761000 protein OS=Oryza sativa subsp. japonica GN=P0460E08.25 PE=4 SV=1	0	5.97224	9.93377	1	4	1	1	151	16.062	9.77	High	High	High	High	High	High	High	High	High	Phospho [S381(100)]	1	1.15305	1.00136	1.10044	1.07367	0.987069	1.26803	1.17655	1.39215	2	2	2	2	2	2	2	2	2	0.222	0	10.8531	1
FALSE	High	Master Protein	Q5QLF6	Os01g0680700 protein OS=Oryza sativa subsp. japonica GN=P0019E03.11-1 PE=2 SV=1	0	5.9675	2.60417	1	5	1	1	384	41.259	10.14	High	High	High	High	High	High	High	High	High	Phospho [S72(100)]	1	0.848544	0.896455	0.872725	0.78213	0.901067	0.886392	0.887452	1.08211	1	1	1	1	1	1	1	1	1	0.931	0	10.7342	1
FALSE	High	Master Protein	A0A0P0WVN6	Os06g0286375 protein OS=Oryza sativa subsp. japonica GN=Os06g0286375 PE=4 SV=1	0	5.94064	7.97546	1	4	1	1	163	17.472	5.1	High	High	High	High	High	High	High	High	High	Phospho [S15(100); S18(98.9)]	1	1.10737	0.904085	1.03593	1.02139	1.10141	1.25856	1.28796	1.47177	1	1	1	1	1	1	1	1	1	0.048	0	4.41232	1
FALSE	High	Master Protein	Q0DSY0	Os03g0281600 protein (Fragment) OS=Oryza sativa subsp. japonica GN=Os03g0281600 PE=3 SV=1	0	5.91328	2.48521	1	1	1	1	845	91.158	5.15	High	High	High	High	High	High	High	High	High	Phospho [S42(100)]	1	1.15203	1.24073	1.16885	1.00631	0.964591	1.12314	0.973892	0.940968	1	1	1	1	1	1	1	1	1	0.311	0	8.37043	1
FALSE	High	Master Protein	Q0E3Y8	Os02g0147700 protein OS=Oryza sativa subsp. japonica GN=Os02g0147700 PE=2 SV=1	0	5.90635	3.80117	1	3	1	1	342	37.123	5.52	High	High	High	High	High	High	High	High	High	Phospho [S434(100)]	1	0.765314	0.656129	0.461284	0.557946	0.483762	0.409104	0.505195	0.406546	2	2	2	2	2	2	2	2	2	0.28	0	23.1036	2
FALSE	High	Master Protein	Q69SV0	Probable L-ascorbate peroxidase 8, chloroplastic OS=Oryza sativa subsp. japonica GN=APX8 PE=2 SV=2	0	5.89933	1.67364	2	9	2	1	478	51.156	5.53	High	High	High	High	High	High	High	High	High	Phospho [S168(100); S172(100)]	1	0.854635	1.0376	0.925499	0.984196	1.31642	1.05022	1.09875	1.36682	1	1	1	1	1	1	1	1	1	0.212	0	3.71604	1
FALSE	High	Master Protein	Q84J66	Os03g0850300 protein OS=Oryza sativa subsp. japonica GN=LOC_Os03g63320 PE=4 SV=1	0	5.89008	7.42188	1	1	1	1	256	26.712	6.7	High	High	High	High	High	High	High	High	High	Phospho [S131(100)]	1	1.1094	1.0767	1.09457	1.16515	1.11705	1.6421	1.45219	1.86022	1	1	1	1	1	1	1	1	1	0.136	0	9.48401	1
FALSE	High	Master Protein	Q5ZCC0	Os01g0125700 protein OS=Oryza sativa subsp. japonica GN=Os01g0125700 PE=2 SV=1	0	5.84375	4.7619	1	3	1	1	315	36.043	5.66	High	High	High	High	High	High	High	High	High	Phospho [T483(99.5)]	1	1.09722	1.00136	1.30762	1.19933	1.18155	1.51615	1.45508	1.61774	1	1	1	1	1	1	1	1	1	0.061	0	4.09516	1
FALSE	High	Master Protein	Q5Z4M6	Os06g0308000 protein OS=Oryza sativa subsp. japonica GN=Os06g0308000 PE=2 SV=1	0	5.84315	2.42086	1	1	1	1	537	59.894	5.29	High	High	High	High	High	High	High	High	High	Phospho [T238(100)]	1	0.90437	0.995637	1.01248	0.928904	0.865884	1.1364	0.947	1.11589	1	1	1	1	1	1	1	1	1	0.145	0	13.5485	1
FALSE	High	Master Protein	A0A0P0WI02	Os05g0147300 protein OS=Oryza sativa subsp. japonica GN=Os05g0147300 PE=4 SV=1	0	5.83003	4.81928	1	4	1	1	249	29.061	5.8	High	High	High	High	High	High	High	High	High	Phospho [S195(100); S198(100)]	1	0.94294	1.09005	1.10141	0.960069	0.920613	1.21784	1.04112	1.19431	1	1	1	1	1	1	1	1	1	0.061	0	3.67986	1
FALSE	High	Master Protein	Q7XF95	Leucine Rich Repeat family protein, expressed OS=Oryza sativa subsp. japonica GN=Os10g0376200 PE=2 SV=1	0	5.81645	2.17391	1	1	1	1	644	67.659	9.63	High	High	High	High	High	High	High	High	High	Phospho [S293(98.5); S301(100); S486(100)]	1	1.22511	0.837327	1.29883	1.12393	1.04375	1.18091	0.996943	1.1171	2	2	2	2	2	2	2	2	2	0.07	0	3.1732	2
FALSE	High	Master Protein	Q0D3J9	Zinc finger CCCH domain-containing protein 53 OS=Oryza sativa subsp. japonica GN=Os07g0682400 PE=2 SV=1	0	5.78023	5.42522	2	3	2	1	682	72.448	6.62	High	High	High	High	High	High	High	High	High	Phospho [S146(100)]	1	1.00993	0.834466	1.08187	1.14002	0.944068	1.20837	1.19768	1.11227	1	1	1	1	1	1	1	1	1	0.334	0	34.4307	1
FALSE	High	Master Protein	Q6Z528	Zinc-finger homeodomain protein 10 OS=Oryza sativa subsp. japonica GN=ZHD10 PE=3 SV=1	0	5.77299	2.50696	1	15	1	1	359	36.932	7.84	High	High	High	High	High	High	High	High	High	Phospho [S291(100)]	1	1.19263	1.10626	1.1278	1.09076	1.09653	1.20742	1.11412	1.32701	1	1	1	1	1	1	1	1	1	0.334	0	13.158	1
FALSE	High	Master Protein	O82118	CONSTANS-like protein Days to heading on chromosome 2 OS=Oryza sativa subsp. japonica GN=DTH2 PE=2 SV=1	0	5.77203	2.457	1	7	1	1	407	44.299	5.29	High	High	High	High	High	High	High	High	High	Phospho [S607(100)]	1	0.939895	0.938417	0.998797	0.932926	0.883476	1.16765	1.20728	1.15691	1	1	1	1	1	1	1	1	1	0.048	0	13.5191	1
FALSE	High	Master Protein	Q10RU8	DENN domain containing protein, expressed OS=Oryza sativa subsp. japonica GN=LOC_Os03g05200 PE=2 SV=1	0	5.70553	1.38151	1	4	1	1	941	103.795	5.35	High	High	High	High	High	High	High	High	High	Phospho [S370(100); T373(100)]	1	1.48089	1.09387	1.33792	1.45569	1.22553	1.5957	1.53863	1.70822	1	1	1	1	1	1	1	1	1	0.093	0	4.05631	1
FALSE	High	Master Protein	Q65XI2	Os05g0106000 protein OS=Oryza sativa subsp. japonica GN=Os05g0106000 PE=2 SV=1	0	5.66857	5.23691	1	1	1	1	401	44.583	8.22	High	High	High	High	High	High	High	High	High	Phospho [S145(100)]	1	1.12869	1.09863	1.13757	1.06864	1.00368	1.18186	1.14965	1.26307	1	1	1	1	1	1	1	1	1	0.202	0	17.3826	1
FALSE	High	Master Protein	Q6ZC68	DNA-binding protein family-like OS=Oryza sativa subsp. japonica GN=Os08g0109500 PE=4 SV=1	0	5.57192	1.52542	1	8	1	1	590	65.059	5.77	High	High	High	High	High	High	High	High	High	Phospho [T418(100)]	1	0.99978	0.959398	1.00564	0.977159	0.989024	1.09189	1.33694	1.28961	1	1	1	1	1	1	1	1	1	0.058	0	10.4787	1
FALSE	High	Master Protein	Q6Z6R6	C2 domain-containing protein-like OS=Oryza sativa subsp. japonica GN=P0705A04.17-1 PE=4 SV=1	0	5.56098	1.81058	1	3	1	1	718	80.915	6.51	High	High	High	High	High	High	High	High	High	Phospho [S60(100)]	1	1.04038	0.931741	1.32326	1.08674	1.19132	1.53603	1.32349	1.55501	1	1	1	1	1	1	1	1	1	0.468	0	15.3269	1
FALSE	High	Master Protein	Q68Y36	Os05g0515900 protein OS=Oryza sativa subsp. japonica GN=Os05g0515900 PE=2 SV=1	0	5.55642	11.8644	1	8	1	1	118	13.345	6.04	High	High	High	High	High	High	High	High	High	Phospho [S109(100)]	1	1.12463	1.13106	1.25973	0.988218	1.05255	1.07579	1.04593	1.06161	1	1	1	1	1	1	1	1	1	2.162	0	9.51583	1
FALSE	High	Master Protein	P56724	60S acidic ribosomal protein P3 OS=Oryza sativa subsp. japonica GN=Os06g0701400 PE=3 SV=3	0	5.55134	15.1261	1	4	1	1	119	11.887	4.41	High	High	High	High	High	High	High	High	High	Phospho [S401(100); S463(100); T467(98.7); T469(98.7)]	1	1.03835	0.933649	0.906931	0.927899	0.859043	1.24152	0.988299	1.29082	2	2	2	2	2	2	2	2	2	0.076	0	4.56271	2
FALSE	High	Master Protein	Q10BX7	Os03g0801800 protein OS=Oryza sativa subsp. japonica GN=LOC_Os03g58720 PE=2 SV=1	0	5.5439	3.54536	2	2	2	1	959	105.333	9.47	High	High	High	High	High	High	High	High	High	Phospho [S160(100)]	1	1.1094	1.03092	1.11803	0.974143	0.925499	1.33622	1.24666	1.44282	1	1	1	1	1	1	1	1	1	0.068	0	15.5418	1
FALSE	High	Master Protein	A0A0P0W719	Os04g0177600 protein OS=Oryza sativa subsp. japonica GN=Os04g0177600 PE=3 SV=1	0	5.53239	2.71647	1	10	1	1	589	66.177	5.99	High	High	High	High	High	High	High	High	High	Phospho [S449(100)]	1	0.94294	1.12248	1.033	0.88266	0.979251	1.1203	1.04016	1.00129	1	1	1	1	1	1	1	1	1	0.08	0	7.90525	1
FALSE	High	Master Protein	Q0IV63	Double-stranded RNA-binding protein 7 OS=Oryza sativa subsp. japonica GN=DRB7 PE=2 SV=1	0	5.52783	2.32558	1	2	1	1	473	51.171	5.08	High	High	High	High	High	High	High	High	High	Phospho [S285(100); S289(100)]	1	0.964255	0.830652	0.86393	0.953032	0.83852	1.11272	1.16694	1.19069	1	1	1	1	1	1	1	1	1	0.222	0	13.8314	1
FALSE	High	Master Protein	Q5VPM1	Os06g0581000 protein OS=Oryza sativa subsp. japonica GN=Os06g0581000 PE=4 SV=1	0	5.51251	1.86441	1	6	1	1	590	63.691	8.82	High	High	High	High	High	High	High	High	High	Phospho [S379(99.5)]	1	1.11245	1.15299	1.24703	1.11489	1.16982	1.23205	1.14197	1.25945	1	1	1	1	1	1	1	1	1	0.186	0	19.9792	1
FALSE	High	Master Protein	B7F7E9	Os05g0178900 protein OS=Oryza sativa subsp. japonica GN=Os05g0178900 PE=2 SV=1	0	5.51162	2.07373	1	9	1	1	434	50.984	9.94	High	High	High	High	High	High	High	High	High	Phospho [S312(100)]	1	1.21598	0.948907	1.26267	1.06563	1.14637	1.17617	1.25626	1.03748	1	1	1	1	1	1	1	1	1	0.103	0	8.0695	1
FALSE	High	Master Protein	Q33B25	Armadillo/beta-catenin-like repeat family protein, expressed OS=Oryza sativa subsp. japonica GN=LOC_Os10g05730 PE=2 SV=1	0	5.50593	1.36364	1	4	1	1	660	69.914	7.37	High	High	High	High	High	High	High	High	High	Phospho [S605(100)]	1	1.07388	0.941278	1.16689	0.96208	0.970455	1.21879	1.10739	1.13399	1	1	1	1	1	1	1	1	1	0.054	0	10.9534	1
FALSE	High	Master Protein	Q6YXI1	Glucose-6-phosphate isomerase OS=Oryza sativa subsp. japonica GN=Os09g0465600 PE=3 SV=1	0	5.48201	1.92	1	3	1	1	625	68.379	6.02	High	High	High	High	High	High	High	High	High	Phospho [S21(100)]	1	1.31646	0.990869	1.28026	0.977159	1.03887	1.08147	1.16118	1.1364	1	1	1	1	1	1	1	1	1	0.292	0	4.97437	1
FALSE	High	Master Protein	Q84ZE8	Auxin-regulated protein-like OS=Oryza sativa subsp. japonica GN=P0683C09.118 PE=2 SV=1	0	5.43227	2.98103	1	3	1	1	369	40.73	5.87	High	High	High	High	High	High	High	High	High	Phospho [S327(100)]	1	1.20177	1.00231	1.03984	0.902766	0.829724	1.17996	1.08723	1.1171	1	1	1	1	1	1	1	1	1	0.172	0	14.7861	2
FALSE	High	Master Protein	Q6H703	Glyceraldehyde-3-phosphate dehydrogenase OS=Oryza sativa subsp. japonica GN=Os02g0171100 PE=2 SV=1	0	5.40084	3.64964	2	6	1	1	411	43.29	8.91	High	High	High	High	High	High	High	High	High	Phospho [S239(100); S242(100)]	1	1.22511	1.01376	1.15028	1.04351	0.975342	1.27656	1.16598	1.50555	1	1	1	1	1	1	1	1	1	0.053	0	3.80652	1
FALSE	High	Master Protein	Q6Z8D4	Os02g0700000 protein OS=Oryza sativa subsp. japonica GN=Os02g0700000 PE=2 SV=1	0	5.40066	1.69287	1	1	1	1	827	91.93	7.71	High	High	High	High	High	High	High	High	High	Phospho [S542(100); S780(100)]	1	1.1835	0.959398	1.09555	1.12494	0.944068	1.15155	1.20536	1.34269	3	3	3	3	3	3	3	3	3	0.095	0	9.0559	2
FALSE	High	Master Protein	A0A0P0V4C5	Os01g0575500 protein OS=Oryza sativa subsp. japonica GN=Os01g0575500 PE=4 SV=1	0	5.39107	1.66113	2	5	2	1	1204	133.84	6.81	High	High	High	High	High	High	High	High	High	Phospho [S561(99.5)]	1	1.18959	0.976564	1.16201	1.04854	0.958728	1.19322	1.0296	0.984397	1	1	1	1	1	1	1	1	1	0.055	0	7.82741	1
FALSE	High	Master Protein	Q7XCS9	Os10g0516800 protein OS=Oryza sativa subsp. japonica GN=LOC_Os10g37280 PE=4 SV=1	0	5.38468	1.98151	1	4	1	1	757	83.222	7.53	High	High	High	High	High	High	High	High	High	Phospho [S319(98.4)]	1	1.0282	0.916482	0.990001	0.96409	0.984137	1.09947	1.08915	1.32097	1	1	1	1	1	1	1	1	1	0.129	0	9.83021	1
FALSE	High	Master Protein	Q6ZGL4	Autophagy protein 5 OS=Oryza sativa subsp. japonica GN=ATG5 PE=2 SV=1	0	5.35096	4.47368	1	5	1	1	380	42.322	5.14	High	High	High	High	High	High	High	High	High	Phospho [S73(100)]	1	0.769374	0.648499	0.598105	0.602179	0.582469	0.554942	0.622369	0.699694	1	1	1	1	1	1	1	1	1	0.155	0	14.4793	1
FALSE	High	Master Protein	Q336R9	Peptide methionine sulfoxide reductase A4, chloroplastic OS=Oryza sativa subsp. japonica GN=MSRA4 PE=2 SV=2	0	5.3068	4.18251	1	5	1	1	263	28.621	8.35	High	High	High	High	High	High	High	High	High	Phospho [S393(100)]	1	1.28398	1.23692	0.754473	0.663503	0.631333	0.657218	0.615646	0.574232	1	1	1	1	1	1	1	1	1	0.064	0	22.5958	1
FALSE	High	Master Protein	Q2QS13	UDP-glucose 6-dehydrogenase 5 OS=Oryza sativa subsp. japonica GN=UGD5 PE=2 SV=1	0	5.30478	2.29167	1	7	1	1	480	52.885	6.13	High	High	High	High	High	High	High	High	High	Phospho [S182(99.2); S186(100); S188(100)]	1	1.07083	0.919343	0.955796	0.837421	0.878589	1.05117	1.04977	1.0797	2	2	2	2	2	2	2	2	2	0.145	0	9.39556	2
FALSE	High	Master Protein	Q0IWT4	DNA ligase OS=Oryza sativa subsp. japonica GN=Os10g0489200 PE=3 SV=1	0	5.29938	1.69082	2	4	2	1	828	89.135	9.54	High	High	High	High	High	High	High	High	High	Phospho [S53(100); S80(100)]	1	0.835349	0.919343	0.864907	0.794193	0.834611	0.661953	0.801012	0.813093	2	2	2	2	2	2	2	2	2	0.389	0	4.61497	2
FALSE	High	Master Protein	A0A0P0X594	Os07g0287100 protein OS=Oryza sativa subsp. japonica GN=Os07g0287100 PE=4 SV=1	0	5.29832	7.61905	2	3	2	1	210	23.27	9.58	High	High	High	High	High	High	High	High	High	Phospho [S25(100)]	1	1.11854	1.07575	0.90009	1.0415	1.18448	1.41292	1.09011	1.44041	1	1	1	1	1	1	1	1	1	0.066	0	7.24215	1
FALSE	High	Master Protein	Q67U60	Os09g0444200 protein OS=Oryza sativa subsp. japonica GN=P0046G12.50-1 PE=2 SV=1	0	5.2594	3.32851	1	3	1	1	691	76.096	6.87	High	High	High	High	High	High	High	High	High	Phospho [T149(99.4)]	1	0.99166	1.17207	1.11021	0.936947	0.981205	1.36747	1.35327	1.54174	1	1	1	1	1	1	1	1	1	0.212	0	14.3287	1
FALSE	High	Master Protein	A0A0P0XQ33	Os09g0500200 protein OS=Oryza sativa subsp. japonica GN=Os09g0500200 PE=4 SV=1	0	5.2371	8.88889	1	4	1	1	180	20.546	8.56	High	High	High	High	High	High	High	High	High	Phospho [S675(100)]	1	1.082	0.809671	1.04473	0.904777	0.951886	1.38357	1.15926	1.45247	1	1	1	1	1	1	1	1	1	0.034	0	3.51279	1
FALSE	High	Master Protein	Q5ZCG4	Os01g0779400 protein OS=Oryza sativa subsp. japonica GN=P0010B10.13-2 PE=4 SV=1	0	5.22432	0.895765	1	1	1	1	1228	136.512	5.33	High	High	High	High	High	High	High	High	High	Phospho [S451(99.4); S503(100)]	1	0.89016	0.699044	0.581491	0.586094	0.596151	0.524638	0.587793	0.69125	2	2	2	2	2	2	2	2	2	0.122	0	16.0277	2
FALSE	High	Master Protein	Q6ZI51	Os02g0595800 protein OS=Oryza sativa subsp. japonica GN=Os02g0595800 PE=4 SV=1	0	5.21269	3.85356	2	7	2	1	519	55.711	9.14	High	High	High	High	High	High	High	High	High	Phospho [S16(100)]	1	0.978465	0.902177	0.942114	0.952027	0.828747	1.01518	1.08819	1.30167	1	1	1	1	1	1	1	1	1	0.145	0	3.81125	1
FALSE	High	Master Protein	Q9XGP7	Tricin synthase 1 OS=Oryza sativa subsp. japonica GN=ROMT-15 PE=1 SV=1	0	5.20197	4.36508	1	1	1	1	252	27.754	5.31	High	High	High	High	High	High	High	High	High	Phospho [S8(100)]	1	1.00384	0.878335	1.00662	0.982186	0.852202	0.982986	1.14101	0.989223	1	1	1	1	1	1	1	1	1	0.055	0	3.30564	1
FALSE	High	Master Protein	Q67WD3	Os06g0639500 protein OS=Oryza sativa subsp. japonica GN=Os06g0639500 PE=4 SV=1	0	5.19956	2.53968	1	2	1	1	630	70.918	6.54	High	High	High	High	High	High	High	High	High	Phospho [S835(100)]	1	1.44131	1.05477	1.2353	1.21542	1.06232	1.37031	1.40417	1.41507	1	1	1	1	1	1	1	1	1	0.033	0	3.29742	1
FALSE	High	Master Protein	Q67U26	Os06g0659300 protein OS=Oryza sativa subsp. japonica GN=Os06g0659300 PE=4 SV=1	0	5.18849	1.87008	1	1	1	1	1016	113.69	8.31	High	High	High	High	High	High	High	High	High	Phospho [S136(98.2); S139(100)]	1	1.15914	1.03188	1.11705	0.991234	1.05841	1.21879	1.18135	1.38009	1	1	1	1	1	1	1	1	1	0.155	0	11.2745	1
FALSE	High	Master Protein	Q6ER21	Zinc-finger homeodomain protein 9 OS=Oryza sativa subsp. japonica GN=ZHD9 PE=3 SV=2	0	5.17076	6.45161	1	6	1	1	341	35.301	7.83	High	High	High	High	High	High	High	High	High	Phospho [S72(100)]	1	0.858695	0.820161	0.826793	0.878639	0.915727	1.7349	1.62508	2.54785	1	1	1	1	1	1	1	1	1	0.778	0	3.24446	1
FALSE	High	Master Protein	Q5W769	Os05g0352800 protein OS=Oryza sativa subsp. japonica GN=Os05g0352800 PE=2 SV=1	0	5.15465	24.7059	1	3	1	1	85	9.16	5.33	High	High	High	High	High	High	High	High	High	Phospho [S373(99.5)]	1	1.00587	0.96512	1.04571	1.03647	0.928431	0.992456	1.03056	1.03748	2	2	2	2	2	2	2	2	2	0.212	0	8.42053	2
FALSE	High	Master Protein	Q8GTK8	Os07g0212200 protein OS=Oryza sativa subsp. japonica GN=OJ1664_D08.107 PE=4 SV=2	0	5.14981	4.84694	2	5	2	1	392	40.983	7.81	High	High	High	High	High	High	High	High	High	Phospho [S406(100)]	1	1.10534	1.09101	1.13953	1.10182	1.08969	1.36084	1.2457	1.49952	1	1	1	1	1	1	1	1	1	0.07	0	3.39704	1
FALSE	High	Master Protein	Q6H657	Os02g0644500 protein OS=Oryza sativa subsp. japonica GN=Os02g0644500 PE=4 SV=1	0	5.14844	2.20588	1	1	1	1	544	57.72	9.09	High	High	High	High	High	High	High	High	High	Phospho [S452(100)]	1	1.35808	1.11294	1.30274	1.32299	1.43174	1.97734	1.73168	2.29693	1	1	1	1	1	1	1	1	1	0.035	0	3.87226	1
FALSE	High	Master Protein	Q688X7	Os05g0562400 protein OS=Oryza sativa subsp. japonica GN=Os05g0562400 PE=4 SV=1	0	5.144	2.14746	1	1	1	1	1397	156.346	5.26	High	High	High	High	High	High	High	High	High	Phospho [S44(100)]	1	1.06373	0.916482	0.997819	0.834406	0.913772	0.974463	1.01807	1.02783	1	1	1	1	1	1	1	1	1	0.194	0	7.25103	1
FALSE	High	Master Protein	Q5ZCK5	Probable calcium-binding protein CML16 OS=Oryza sativa subsp. japonica GN=CML16 PE=2 SV=1	0	5.12651	10.4972	1	2	1	1	181	19.251	4.59	High	High	High	High	High	High	High	High	High	Phospho [S657(100)]	1	0.937865	0.885011	1.00857	0.933931	0.905954	1.19796	1.22553	1.43679	1	1	1	1	1	1	1	1	1	0.054	0	6.35312	1
FALSE	High	Master Protein	Q6AT58	Os03g0655600 protein OS=Oryza sativa subsp. japonica GN=Os03g0655600 PE=4 SV=1	0	5.12045	1.59475	1	2	1	1	1066	115.661	5.76	High	High	High	High	High	High	High	High	High	Phospho [S69(100)]	1	0.950045	0.967981	0.968501	0.968111	0.877612	0.838095	0.833667	0.828776	1	1	1	1	1	1	1	1	1	0.292	0	19.6991	1
FALSE	High	Master Protein	A0A0P0WQC3	Os05g0542732 protein OS=Oryza sativa subsp. japonica GN=Os05g0542732 PE=4 SV=1	0	5.10182	9.90991	1	6	1	1	111	11.046	11.47	High	High	High	High	High	High	High	High	High	Phospho [S119(100)]	1	1.00993	0.929834	0.861975	0.953032	0.954818	0.849459	0.842311	0.868586	1	1	1	1	1	1	1	1	1	0.066	0	24.3058	1
FALSE	High	Master Protein	Q7XDE0	EF hand family protein, expressed OS=Oryza sativa subsp. japonica GN=LOC_Os10g33680 PE=2 SV=2	0	5.09227	2.5878	1	6	1	1	541	61.866	4.93	High	High	High	High	High	High	High	High	High	Phospho [T225(100); Y227(100)]	1	1.23729	0.901224	1.06916	1.21843	1.01737	1.09284	1.09203	1.19792	1	1	1	1	1	1	1	1	1	0.11	0	4.1089	1
FALSE	High	Master Protein	Q84UI5	Mitogen-activated protein kinase 1 OS=Oryza sativa subsp. japonica GN=MPK1 PE=1 SV=1	0	5.07017	3.76884	1	1	1	1	398	44.829	5.74	High	High	High	High	High	High	High	High	High	Phospho [S302(100)]	1	1.11854	1.1015	1.01346	0.861549	1.05353	1.25667	1.22265	1.29443	1	1	1	1	1	1	1	1	1	0.122	0	4.17582	1
FALSE	High	Master Protein	Q0JAJ6	OSJNBa0009P12.34 protein OS=Oryza sativa subsp. japonica GN=Os04g0594400 PE=2 SV=1	0	5.01274	11.465	1	1	1	1	314	33.212	5.11	High	High	High	High	High	High	High	High	High	Phospho [S181(100)]	1	0.94903	0.854493	0.869794	0.777103	0.867839	0.849459	0.850955	0.948206	1	1	1	1	1	1	1	1	1	0.155	0	9.49341	1
FALSE	High	Master Protein	Q337D8	MSP domain containing protein, expressed OS=Oryza sativa subsp. japonica GN=Os10g0507600 PE=4 SV=1	0	5.00358	5.83333	1	5	1	1	240	26.625	5.43	High	High	High	High	High	High	High	High	High	Phospho [S60(100); S1086(100)]	1	1.12767	1.33991	1.59202	1.31695	1.31642	1.27561	1.12276	1.10383	2	2	2	2	2	2	2	2	2	0.078	0	14.4646	2
FALSE	High	Master Protein	Q7X8B5	Calcium-transporting ATPase OS=Oryza sativa subsp. japonica GN=Os04g0605500 PE=3 SV=2	0	4.98079	1.74632	2	7	2	1	1088	117.588	7.36	High	High	High	High	High	High	High	High	High	Phospho [Y120(100)]	1	1.11651	1.02139	1.1796	1.05155	1.07698	1.13356	1.05169	1.03748	2	2	2	2	2	2	2	2	2	0.359	0	4.59625	2
FALSE	High	Master Protein	Q0IMS5	Nucleoside diphosphate kinase OS=Oryza sativa subsp. japonica GN=Os12g0548300 PE=2 SV=1	0	4.97112	7.72727	2	2	2	1	220	23.455	9.45	High	High	High	High	High	High	High	High	High	Phospho [S523(100)]	1	1.05155	0.997545	1.13855	1.10081	1.07307	1.15913	1.12564	1.32097	2	2	2	2	2	2	2	2	2	0.166	0	16.3359	2
FALSE	High	Master Protein	Q10S67	Os03g0132800 protein OS=Oryza sativa subsp. japonica GN=Os03g0132800 PE=2 SV=1	0	4.95863	4.51977	2	8	2	1	531	59.338	6.49	High	High	High	High	High	High	High	High	High	Phospho [Y300(99.4)]	1	0.96527	0.898363	0.882498	1.05457	0.939182	1.00477	1.14485	1.02179	1	1	1	1	1	1	1	1	1	0.077	0	6.56637	1
FALSE	High	Master Protein	Q8LNI5	Os10g0521700 protein OS=Oryza sativa subsp. japonica GN=LOC_Os10g37740 PE=3 SV=1	0	4.94808	2.98507	1	3	1	1	469	52.6	7.55	High	High	High	High	High	High	High	High	High	Phospho [S198(100)]	1	1.11346	1.10626	1.09262	1.09176	1.09066	1.05591	1.08434	1.10262	2	2	2	2	2	2	2	2	2	0.274	0	9.07486	2
FALSE	High	Master Protein	A0A0P0WQ70	Os05g0553700 protein OS=Oryza sativa subsp. japonica GN=Os05g0553700 PE=3 SV=1	0	4.93414	8.95522	2	4	2	1	268	30.047	5.34	High	High	High	High	High	High	High	High	High	Phospho [S284(100)]	1	1.07692	0.887872	1.0418	0.85049	0.833634	1.06159	1.03344	1.17259	1	1	1	1	1	1	1	1	1	0.089	0	21.1286	1
FALSE	High	Master Protein	Q10NK5	Os03g0266700 protein OS=Oryza sativa subsp. japonica GN=Os03g0266700 PE=2 SV=1	0	4.89415	2.28426	1	8	1	1	394	44.637	5.99	High	High	High	High	High	High	High	High	High	Phospho [S56(100)]	1	1.0282	0.88215	0.882498	0.925889	0.787701	1.16481	1.06898	1.07005	1	1	1	1	1	1	1	1	1	0.334	0	3.49431	1
FALSE	High	Master Protein	Q6K5F6	Os02g0602300 protein OS=Oryza sativa subsp. japonica GN=Os02g0602300 PE=2 SV=1	0	4.89279	9.60452	1	1	1	1	177	20.915	4.31	High	High	High	High	High	High	High	High	High	Phospho [S96(99.7)]	1	0.962225	0.964166	0.976319	0.819326	0.848293	0.963099	0.947	1.01214	1	1	1	1	1	1	1	1	1	0.931	0	10.9348	1
FALSE	High	Master Protein	Q9FP22	Os06g0274000 protein OS=Oryza sativa subsp. japonica GN=Os06g0274000 PE=4 SV=1	0	4.88625	12.1212	1	12	1	1	99	10.474	4.36	High	High	High	High	High	High	High	High	High	Phospho [S87(99.7)]	1	1.09722	1.11294	1.15419	0.898745	0.821906	0.84283	0.835588	1.02541	2	2	2	2	2	2	2	2	2	1.512	0	23.6001	2
FALSE	High	Master Protein	A0A0P0XLD9	Os09g0375100 protein (Fragment) OS=Oryza sativa subsp. japonica GN=Os09g0375100 PE=4 SV=1	0	4.88527	12.5	2	20	2	1	88	9.997	6.9	High	High	High	High	High	High	High	High	High	Phospho [S363(99.5)]	1	1.23019	0.924112	1.0848	1.15912	0.946023	1.46974	1.4109	1.48625	1	1	1	1	1	1	1	1	1	0.072	0	8.16821	1
FALSE	High	Master Protein	A0A0N7KI38	Os03g0764450 protein (Fragment) OS=Oryza sativa subsp. japonica GN=Os03g0764450 PE=4 SV=1	0	4.85171	3.78947	1	4	1	1	475	54.246	11.49	High	High	High	High	High	High	High	High	High	Phospho [S127(100)]	1	1.14696	1.04141	1.11705	1.04351	0.982183	1.41008	1.30909	1.3451	2	2	2	2	2	2	2	2	2	0.585	0	7.0695	1
FALSE	High	Master Protein	Q5QLQ9	HMG protein-like OS=Oryza sativa subsp. japonica GN=Os01g0666200 PE=2 SV=1	0	4.84957	9.02256	1	4	1	1	133	15.555	9.57	High	High	High	High	High	High	High	High	High	Phospho [S857(100)]	1	1.02719	0.991823	0.923545	0.827368	0.902044	1.14303	0.932593	0.928904	1	1	1	1	1	1	1	1	1	0.037	0	9.66409	1
FALSE	High	Master Protein	Q2R374	Retinoblastoma-related protein 2 OS=Oryza sativa subsp. japonica GN=RBR2 PE=2 SV=2	0	4.83833	1.12474	1	3	1	1	978	107.796	8.13	High	High	High	High	High	High	High	High	High	Phospho [S425(100)]	1	0.980495	0.802995	1.01443	0.967106	0.859043	1.18375	1.1122	1.175	1	1	1	1	1	1	1	1	1	0.083	0	6.67617	1
FALSE	High	Master Protein	Q8LQM2	Drought-inducible protein 1OS OS=Oryza sativa subsp. japonica GN=Os01g0785700 PE=2 SV=1	0	4.83268	3.68664	1	2	1	1	434	47.692	6.64	High	High	High	High	High	High	High	High	High	Phospho [S733(100)]	1	1.04546	0.967981	1.14344	1.11288	1.08773	1.19227	1.17655	1.22446	1	1	1	1	1	1	1	1	1	0.055	0	15.2915	1
FALSE	High	Master Protein	Q6K2F0	Heat shock protein-like OS=Oryza sativa subsp. japonica GN=Os02g0510000 PE=4 SV=1	0	4.82275	1.22616	1	5	1	1	734	82.339	8.9	High	High	High	High	High	High	High	High	High	Phospho [S60(100)]	1	1.07286	1.1425	1.08871	0.936947	1.13855	1.63642	1.99389	1.87349	1	1	1	1	1	1	1	1	1	0.155	0	7.76726	1
FALSE	High	Master Protein	Q5JJJ8	Os01g0920100 protein OS=Oryza sativa subsp. japonica GN=Os01g0920100 PE=2 SV=1	0	4.81987	6.49351	1	2	1	1	231	24.923	7.97	High	High	High	High	High	High	High	High	High	Phospho [S73(100); S81(100); S83(100)]	1	1.08606	1.00517	1.17569	1.06462	0.987069	1.21879	1.18807	1.31977	2	2	2	2	2	2	2	2	2	0.155	0	19.3186	2
FALSE	High	Master Protein	A0A0P0WZF6	Os06g0631300 protein (Fragment) OS=Oryza sativa subsp. japonica GN=Os06g0631300 PE=4 SV=1	0	4.81276	4.05157	2	8	2	1	543	58.334	5.27	High	High	High	High	High	High	High	High	High	Phospho [S52(100); S57(100)]	1	1.16624	1.33801	1.23237	0.91483	1.49526	2.04931	1.83445	2.37655	1	1	1	1	1	1	1	1	1	0.334	0	2.9341	1
FALSE	High	Master Protein	Q5JMX3	Os01g0752800 protein OS=Oryza sativa subsp. japonica GN=Os01g0752800 PE=4 SV=1	0	4.81023	13.253	1	1	1	1	166	19.15	7.4	High	High	High	High	High	High	High	High	High	Phospho [S613(100)]	1	1.02414	0.984193	1.13464	0.770066	0.842429	0.977304	1.04016	1.08453	1	1	1	1	1	1	1	1	1	0.058	0	3.176	1
FALSE	High	Master Protein	Q7EZR6	Os08g0130600 protein OS=Oryza sativa subsp. japonica GN=P0582D05.131 PE=4 SV=1	0	4.80855	2.65211	1	1	1	1	641	71.252	6.43	High	High	High	High	High	High	High	High	High	Phospho [T524(100)]	1	1.16523	1.01376	1.30274	1.12192	1.11412	1.64305	1.42626	1.63101	1	1	1	1	1	1	1	1	1	0.122	0	23.6247	1
FALSE	High	Master Protein	Q6Z7B0	Dnak-type molecular chaperone Bip OS=Oryza sativa subsp. japonica GN=Os02g0115900 PE=2 SV=1	0	4.8064	1.20301	1	9	1	1	665	73.345	5.19	High	High	High	High	High	High	High	High	High	Phospho [S745(100)]	1	0.95715	0.964166	0.877612	0.855517	1.06037	0.981092	0.916266	1.10624	1	1	1	1	1	1	1	1	1	0.034	0	8.60784	1
FALSE	High	Master Protein	Q5JJU6	Os01g0967100 protein OS=Oryza sativa subsp. japonica GN=Os01g0967100 PE=4 SV=1	0	4.78835	1.36546	1	3	1	1	1245	135.176	8.34	High	High	High	High	High	High	High	High	High	Phospho [S366(100)]	1	1.29515	1.08624	0.845361	0.662498	0.679221	0.694151	0.665589	0.764838	1	1	1	1	1	1	1	1	1	0.087	0	14.3532	1
FALSE	High	Master Protein	Q8H513	Os07g0520400 protein OS=Oryza sativa subsp. japonica GN=OJ1793_E11.120 PE=2 SV=1	0	4.78334	1.00559	1	8	1	1	895	95.4	5.58	High	High	High	High	High	High	High	High	High	Phospho [S79(100); S83(100)]	1	1.09621	1.06526	1.07014	1.29383	1.24312	1.34663	1.17463	1.23532	1	1	1	1	1	1	1	1	1	0.136	0	7.27648	1
FALSE	High	Master Protein	Q5JLQ6	Os01g0759700 protein OS=Oryza sativa subsp. japonica GN=B1131G08.43-1 PE=2 SV=1	0	4.77573	3.83747	1	2	1	1	443	47.299	5.06	High	High	High	High	High	High	High	High	High	Phospho [S443(100)]	1	1.07083	1.05	1.02909	0.888692	0.881521	1.07863	1.01327	0.996461	2	2	2	2	2	2	2	2	2	0.334	0	15.8783	2
FALSE	High	Master Protein	Q0J5P2	Os08g0416400 protein (Fragment) OS=Oryza sativa subsp. japonica GN=Os08g0416400 PE=4 SV=1	0	4.76407	1.78926	2	6	2	1	503	54.708	7.9	High	High	High	High	High	High	High	High	High	Phospho [S59(100)]	1	1.08606	0.978471	1.11216	0.953032	0.944068	1.02181	1.08626	1.12675	1	1	1	1	1	1	1	1	1	0.145	0	5.34888	1
FALSE	High	Master Protein	Q0J0K9	Os09g0494300 protein OS=Oryza sativa subsp. japonica GN=Os09g0494300 PE=2 SV=1	0	4.75203	4.7619	1	2	1	1	315	35.389	5.34	High	High	High	High	High	High	High	High	High	Phospho [S17(100)]	1	1.20583	1.19591	1.04962	0.673556	0.938204	0.911961	1.0344	1.17259	1	1	1	1	1	1	1	1	1	0.105	0	3.39626	1
FALSE	High	Master Protein	Q6L4S2	Os05g0592000 protein OS=Oryza sativa subsp. japonica GN=Os05g0592000 PE=3 SV=1	0	4.74256	6.36943	1	1	1	1	314	34.927	8.54	High	High	High	High	High	High	High	High	High	Phospho [S19(99.4)]	1	1.07489	1.05572	0.974364	0.860544	0.848293	1.05875	0.994062	1.07488	1	1	1	1	1	1	1	1	1	0.212	0	9.55939	1
FALSE	High	Master Protein	Q0J9X9	OSJNBb0060E08.9 protein OS=Oryza sativa subsp. japonica GN=Os04g0626100 PE=2 SV=1	0	4.72816	7.72947	1	6	1	1	207	22.504	9.72	High	High	High	High	High	High	High	High	High	Phospho [S331(100); S334(100)]	1	0.810989	0.850679	1.08969	1.03446	0.88543	1.51236	1.60298	2.36931	1	1	1	1	1	1	1	1	1	0.072	0	2.8976	1
FALSE	High	Master Protein	Q6AUH9	Os05g0145300 protein OS=Oryza sativa subsp. japonica GN=Os05g0145300 PE=4 SV=1	0	4.72423	3.03571	1	1	1	1	560	64.6	8.63	High	High	High	High	High	High	High	High	High	Phospho [S331(100); S335(99.4)]	1	1.09113	1.06049	1.12585	0.960069	0.948955	0.910067	0.846153	0.81068	2	2	2	2	2	2	2	2	2	0.119	0	13.5617	1
FALSE	High	Master Protein	A3C1D8	Os09g0556200 protein OS=Oryza sativa subsp. japonica GN=Os09g0556200 PE=4 SV=1	0	4.72377	1.45773	1	8	1	1	686	77.553	5.43	High	High	High	High	High	High	High	High	High	Phospho [S22(100)]	1	1.20481	0.980379	1.31935	1.29082	1.26755	1.6563	1.71728	1.67565	1	1	1	1	1	1	1	1	1	0.129	0	10.3709	1
FALSE	High	Master Protein	A0A0N7KJ06	Os04g0405800 protein (Fragment) OS=Oryza sativa subsp. japonica GN=Os04g0405800 PE=3 SV=1	0	4.72216	3.9604	1	3	1	1	303	32.231	8.84	High	High	High	High	High	High	High	High	High	Phospho [T130(100)]	1	0.585658	1.06144	0.960682	1.0224	1.23921	1.35705	1.24762	1.666	1	1	1	1	1	1	1	1	1	0.089	0	3.40492	1
FALSE	High	Master Protein	Q0J0H9	S-acyltransferase OS=Oryza sativa subsp. japonica GN=Os09g0508300 PE=2 SV=1	0	4.70399	5.89569	1	1	1	1	441	49.454	8.37	High	High	High	High	High	High	High	High	High	Phospho [S579(100)]	1	1.09215	1.07289	1.04962	1.24457	0.966546	1.1364	1.00751	1.15811	1	1	1	1	1	1	1	1	1	0.038	0	6.63939	1
FALSE	High	Master Protein	Q0IZJ8	Os09g0566100 protein OS=Oryza sativa subsp. japonica GN=Os09g0566100 PE=4 SV=1	0	4.68846	1.68382	1	2	1	1	1069	115.885	6.73	High	High	High	High	High	High	High	High	High	Phospho [S89(99); S90(99)]	1	0.990645	0.947	1.01932	0.885676	0.932341	2.9821	2.77377	3.9581	1	1	1	1	1	1	1	1	1	0.585	0	6.10704	1
FALSE	High	Master Protein	Q2R4Z4	Water stress-inducible protein Rab21 OS=Oryza sativa subsp. japonica GN=RAB21 PE=2 SV=1	0	4.68846	9.88372	1	7	1	1	172	17.315	9.2	High	High	High	High	High	High	High	High	High	Phospho [S284(99.4)]	1	1.07286	1.07098	1.18351	1.32198	1.12878	1.43092	1.09971	1.37405	1	1	1	1	1	1	1	1	1	0.179	0	3.74333	1
FALSE	High	Master Protein	Q7XBW5	Probable plastid-lipid-associated protein 3, chloroplastic OS=Oryza sativa subsp. japonica GN=PAP3 PE=3 SV=1	0	4.68487	4.54545	1	2	1	1	374	40.016	4.55	High	High	High	High	High	High	High	High	High	Phospho [S16(99.6)]	1	1.1297	1.01376	0.968501	0.88266	0.903022	1.5152	1.33598	1.4211	1	1	1	1	1	1	1	1	1	0.155	0	6.43543	1
FALSE	High	Master Protein	Q0DY26	Os02g0720000 protein (Fragment) OS=Oryza sativa subsp. japonica GN=Os02g0720000 PE=4 SV=1	0	4.68131	4.69208	1	4	1	1	341	35.949	4.5	High	High	High	High	High	High	High	High	High	Phospho [S55(99.3); S60(100)]	1	1.22917	0.91076	0.965569	0.851496	0.860998	1.00287	0.887452	1.08573	1	1	1	1	1	1	1	1	1	0.468	0	9.8247	1
FALSE	High	Master Protein	Q0JEF2	Os04g0283900 protein OS=Oryza sativa subsp. japonica GN=Os04g0283900 PE=4 SV=2	0	4.63023	10.6557	1	6	1	1	122	11.732	6.02	High	High	High	High	High	High	High	High	High	Phospho [S57(100)]	1	0.994705	0.905992	1.12194	1.09478	1.01346	1.06916	1.21208	1.11589	1	1	1	1	1	1	1	1	1	0.292	0	10.4866	1
FALSE	High	Master Protein	Q6Z703	Os02g0125000 protein OS=Oryza sativa subsp. japonica GN=P0575F10.35-1 PE=4 SV=1	0	4.62452	5.34759	1	3	1	1	187	19.151	9.74	High	High	High	High	High	High	High	High	High	Phospho [S178(96)]	1	1.22308	1.11675	1.18644	0.994249	0.980228	1.42902	1.384	1.36561	2	2	2	2	2	2	2	2	2	0.233	0	3.38237	1
FALSE	High	Master Protein	Q67V39	Os06g0634600 protein OS=Oryza sativa subsp. japonica GN=Os06g0634600 PE=4 SV=1	0	4.5917	5.54324	1	4	1	1	451	47.463	4.75	High	High	High	High	High	High	High	High	High	Phospho [S133(100); S253(100); S255(100)]	1	1.29515	1.1673	1.41415	1.22849	1.28221	1.32864	1.26203	1.38129	2	2	2	2	2	2	2	2	2	0.194	0	5.27382	2
FALSE	High	Master Protein	A0A0P0WWI0	Os06g0332900 protein (Fragment) OS=Oryza sativa subsp. japonica GN=Os06g0332900 PE=4 SV=1	0	4.58111	6.40244	2	2	2	1	328	36.705	10.26	High	High	High	High	High	High	High	High	High	Phospho [S62(99.6)]	1	1.10433	1.0109	1.01443	1.0033	0.915727	1.30307	1.14293	1.31374	2	2	2	2	2	2	2	2	2	2.162	0	5.60274	1
FALSE	High	Master Protein	Q5KQI2	Os05g0481600 protein OS=Oryza sativa subsp. japonica GN=Os05g0481600 PE=2 SV=1	0	4.57179	16.6667	1	5	1	1	66	7.492	8.98	High	High	High	High	High	High	High	High	High	Phospho [S6(100); S8(100); S50(100); S52(99.2)]	1	1.13681	0.950815	1.00759	0.937952	0.875657	1.09473	1.06898	1.11107	2	2	2	2	2	2	2	2	2	0.585	0	19.077	2
FALSE	High	Master Protein	Q0IYH3	Os10g0214400 protein (Fragment) OS=Oryza sativa subsp. japonica GN=Os10g0214400 PE=4 SV=1	0	4.55384	12.1212	2	7	2	1	165	19.68	11.49	High	High	High	High	High	High	High	High	High	Phospho [S408(100)]	1	1.17538	0.930788	0.968501	0.924883	0.945045	1.1686	1.19095	1.42231	1	1	1	1	1	1	1	1	1	0.585	0	12.5081	1
FALSE	High	Master Protein	A0A0P0XBI1	Os08g0110800 protein (Fragment) OS=Oryza sativa subsp. japonica GN=Os08g0110800 PE=4 SV=1	0	4.54716	3.57143	1	5	1	1	420	43.896	8.65	High	High	High	High	High	High	High	High	High	Phospho [S275(100)]	1	1.02414	0.855447	1.34183	1.12594	1.1405	1.17049	0.964288	1.14364	1	1	1	1	1	1	1	1	1	0.179	0	3.53056	1
FALSE	High	Master Protein	Q10F25	GATA transcription factor 18 OS=Oryza sativa subsp. japonica GN=GATA18 PE=2 SV=1	0	4.53298	7.21003	1	1	1	1	319	34.102	4.67	High	High	High	High	High	High	High	High	High	Phospho [S58(100)]	1	0.88001	0.877382	1.19719	1.37928	1.28124	1.43944	1.19383	1.53209	1	1	1	1	1	1	1	1	1	0.179	0	23.0347	1
FALSE	High	Master Protein	Q6Z7V2	24.1 kDa heat shock protein, mitochondrial OS=Oryza sativa subsp. japonica GN=HSP24.1 PE=2 SV=1	0	4.53106	5.45455	1	9	1	1	220	24.082	7.5	High	High	High	High	High	High	High	High	High	Phospho [S479(99.6); S480(99.4)]	1	1.17944	0.866891	0.923545	0.917846	0.774019	0.901544	1.00655	1.03145	2	2	2	2	2	2	2	2	2	0.155	0	12.9593	1
FALSE	High	Master Protein	Q5N6W3	ABC1-like OS=Oryza sativa subsp. japonica GN=P0551C06.44-1 PE=2 SV=1	0	4.52311	2.25873	1	9	1	1	487	55.255	7.01	High	High	High	High	High	High	High	High	High	Phospho [S554(100)]	1	0.96324	0.849725	0.865884	0.972133	0.881521	0.941318	0.891294	0.983191	1	1	1	1	1	1	1	1	1	0.062	0	9.5822	1
FALSE	High	Master Protein	A0A0P0VRH8	Os02g0827500 protein (Fragment) OS=Oryza sativa subsp. japonica GN=Os02g0827500 PE=4 SV=1	0	4.51756	2.25443	1	3	1	1	621	68.601	5.68	High	High	High	High	High	High	High	High	High	Phospho [S517(100); S518(100)]	1	1.08301	0.922204	0.947	0.898745	0.951886	1.23773	1.117	1.03265	1	1	1	1	1	1	1	1	1	0.08	0	6.08425	1
FALSE	High	Master Protein	Q2QQ93	DnaJ domain containing protein, expressed OS=Oryza sativa subsp. japonica GN=Os12g0502700 PE=4 SV=2	0	4.51201	2.47117	1	2	1	1	607	68.177	5.76	High	High	High	High	High	High	High	High	High	Phospho [S180(100)]	1	0.876965	0.688554	1.00466	0.781124	0.868816	1.16765	0.991181	1.13519	1	1	1	1	1	1	1	1	1	0.194	0	8.07702	1
FALSE	High	Master Protein	Q5JMG3	Os01g0763000 protein OS=Oryza sativa subsp. japonica GN=Os01g0763000 PE=2 SV=1	0	4.50169	5.75916	1	3	1	1	191	21.747	8.44	High	High	High	High	High	High	High	High	High	Phospho [S188(100)]	1	1.22613	0.990869	1.08969	0.754986	0.897158	0.598504	0.702086	0.620074	1	1	1	1	1	1	1	1	1	0.179	0	16.3476	1
FALSE	High	Master Protein	Q8LN31	Expressed protein OS=Oryza sativa subsp. japonica GN=LOC_Os10g38970 PE=2 SV=1	0	4.48745	5.69106	1	6	1	1	246	27.204	6.98	High	High	High	High	High	High	High	High	High	Phospho [S696(100)]	1	1.17538	1.03855	0.992933	1.04451	0.978273	1.17712	1.16694	1.18948	1	1	1	1	1	1	1	1	1	0.048	0	10.88	1
FALSE	High	Master Protein	Q0INC5	DEAD-box ATP-dependent RNA helicase 28 OS=Oryza sativa subsp. japonica GN=Os12g0481100 PE=2 SV=2	0	4.48452	1.74564	1	4	1	1	802	89.453	5.43	High	High	High	High	High	High	High	High	High	Phospho [S542(100)]	1	0.808959	0.533105	0.584423	0.652445	0.593219	0.730137	0.71073	1.05919	1	1	1	1	1	1	1	1	1	0.027	0	6.36092	1
FALSE	High	Master Protein	Q10PQ6	Nup133 nucleoporin family protein, expressed OS=Oryza sativa subsp. japonica GN=Os03g0225500 PE=4 SV=1	0	4.47108	0.930233	1	2	1	1	1290	144.159	6.37	High	High	High	High	High	High	High	High	High	Phospho [S241(100)]	1	1.22917	1.03283	1.1581	1.21441	1.11412	1.35421	1.31581	1.60206	1	1	1	1	1	1	1	1	1	0.155	0	3.81155	1
FALSE	High	Master Protein	A0A0P0Y9M7	Os12g0433133 protein (Fragment) OS=Oryza sativa subsp. japonica GN=Os12g0433133 PE=4 SV=1	0	4.45124	5.12821	1	1	1	1	312	34.269	4.88	High	High	High	High	High	High	High	High	High	Phospho [S36(98.4)]	1	1.01196	1.00804	1.1278	0.906788	0.994888	0.990562	1.00367	1.05316	1	1	1	1	1	1	1	1	1	0.068	0	3.17452	1
FALSE	High	Master Protein	Q7XN57	OSJNBb0103I08.5 protein OS=Oryza sativa subsp. japonica GN=Os04g0541500 PE=2 SV=2	0	4.44129	1.87166	1	2	1	1	748	82.586	8.56	High	High	High	High	High	High	High	High	High	Phospho [S18(99.3)]	1	2.29087	1.07479	1.06037	0.88065	1.01834	1.11083	0.994062	1.09056	1	1	1	1	1	1	1	1	1	0.093	0	3.11459	1
FALSE	High	Master Protein	Q84R49	Endoglucanase 10 OS=Oryza sativa subsp. japonica GN=GLU2 PE=2 SV=1	0	4.43016	3.22581	1	1	1	1	620	69.022	8.95	High	High	High	High	High	High	High	High	High	Phospho [S65(100); T66(100)]	1	0.85362	1.08528	0.855134	0.879644	0.895203	1.37978	1.17847	1.39456	1	1	1	1	1	1	1	1	1	0.11	0	6.02197	1
FALSE	High	Master Protein	Q84JI0	Probable protein phosphatase 2C 30 OS=Oryza sativa subsp. japonica GN=Os03g0268600 PE=2 SV=1	0	4.42366	4.70297	1	2	1	1	404	43.255	5.91	High	High	High	High	High	High	High	High	High	Phospho [S543(100)]	1	0.86986	0.768663	0.639152	0.641386	0.65772	0.706462	0.678075	0.794997	1	1	1	1	1	1	1	1	1	0.061	0	16.9252	1
FALSE	High	Master Protein	Q84SL0	Os07g0568600 protein OS=Oryza sativa subsp. japonica GN=OJ1092_A07.132 PE=3 SV=2	0	4.41274	1.81818	1	6	1	1	550	62.369	7.42	High	High	High	High	High	High	High	High	High	Phospho [S721(100)]	1	1.06271	0.800134	0.904976	0.940968	0.793564	1.35989	0.92491	1.00852	1	1	1	1	1	1	1	1	1	0.044	0	3.36958	1
FALSE	High	Master Protein	Q94LH1	Os03g0395300 protein OS=Oryza sativa subsp. japonica GN=Os03g0395300 PE=2 SV=1	0	4.4096	2.19072	1	1	1	1	776	86.939	5.33	High	High	High	High	High	High	High	High	High	Phospho [S259(100)]	1	1.11448	0.948907	1.01248	1.08473	0.937227	1.21121	1.14293	1.10262	1	1	1	1	1	1	1	1	1	0.101	0	24.5502	1
FALSE	High	Master Protein	Q33BE1	Os10g0115600 protein OS=Oryza sativa subsp. japonica GN=Os10g0115600 PE=4 SV=1	0	4.38605	3.02376	1	7	1	1	463	55.081	9.09	High	High	High	High	High	High	High	High	High	Phospho [S59(100); S61(100)]	1	1.07388	0.935556	1.09555	1.04954	0.946023	1.40724	1.287	1.53812	2	2	2	2	2	2	2	2	2	0.172	0	8.22552	2
FALSE	High	Master Protein	Q653U9	Os06g0677300 protein OS=Oryza sativa subsp. japonica GN=Os06g0677300 PE=2 SV=1	0	4.37414	6.8323	2	7	2	1	483	52.803	8.51	High	High	High	High	High	High	High	High	High	Phospho [S458(100)]	1	0.964255	0.865938	0.989024	0.890703	0.946023	1.13166	1.09011	1.10986	1	1	1	1	1	1	1	1	1	0.045	0	15.6171	1
FALSE	High	Master Protein	Q67IU4	Os02g0152500 protein OS=Oryza sativa subsp. japonica GN=P0463E12.2-1 PE=2 SV=1	0	4.36866	2.26969	1	5	1	1	749	82.582	7.53	High	High	High	High	High	High	High	High	High	Phospho [S41(100)]	1	1.07794	0.812532	1.09946	0.870597	0.794542	1.29834	1.21112	1.45006	1	1	1	1	1	1	1	1	1	0.136	0	2.88	1
FALSE	High	Master Protein	Q10MD7	Os03g0312600 protein OS=Oryza sativa subsp. japonica GN=LOC_Os03g19870 PE=2 SV=1	0	4.36161	4.29293	1	1	1	1	396	44.212	4.59	High	High	High	High	High	High	High	High	High	Phospho [S77(100)]	1	1.04749	0.904085	1.06721	1.1551	1.01932	1.49437	1.26683	1.38371	1	1	1	1	1	1	1	1	1	0.389	0	8.52436	1
FALSE	High	Master Protein	A0A0P0VGR0	Os02g0228151 protein OS=Oryza sativa subsp. japonica GN=Os02g0228151 PE=4 SV=1	0	4.35242	9.40171	1	3	1	1	117	12.376	4.94	High	High	High	High	High	High	High	High	High	Phospho [S693(100)]	1	0.905385	0.699998	0.959705	0.765039	0.787701	1.43376	1.56169	1.3258	1	1	1	1	1	1	1	1	1	0.049	0	3.35508	1
FALSE	High	Master Protein	Q7X745	ATP-dependent RNA helicase SUV3L, mitochondrial OS=Oryza sativa subsp. japonica GN=LOC_Os04g38630 PE=2 SV=2	0	4.32349	2.45232	1	1	1	1	734	82.803	7.9	High	High	High	High	High	High	High	High	High	Phospho [S904(100)]	1	0.972375	0.959398	1.07112	1.05859	1.03105	1.20174	1.23225	1.22808	1	1	1	1	1	1	1	1	1	0.043	0	8.72342	1
FALSE	High	Master Protein	Q10MJ1	Probable glutamyl endopeptidase, chloroplastic OS=Oryza sativa subsp. japonica GN=GEP PE=2 SV=1	0	4.27409	1.27932	1	4	1	1	938	103.83	5.95	High	High	High	High	High	High	High	High	High	Phospho [S255(99.4)]	1	1.03632	1.02329	1.13855	1.06261	1.11119	1.33811	1.21977	1.26669	1	1	1	1	1	1	1	1	1	0.077	0	6.92889	1
FALSE	High	Master Protein	Q5ZBT1	Os01g0796700 protein OS=Oryza sativa subsp. japonica GN=Os01g0796700 PE=2 SV=1	0	4.26528	5.31697	1	4	1	1	489	53.45	7.83	High	High	High	High	High	High	High	High	High	Phospho [S100(100); S113(100)]	1	1.15508	1.09101	1.05353	0.900756	0.916704	1.37315	1.28892	1.46936	2	2	2	2	2	2	2	2	2	0.145	0	4.50493	2
FALSE	High	Master Protein	Q0ITY8	Os11g0207200 protein (Fragment) OS=Oryza sativa subsp. japonica GN=Os11g0207200 PE=4 SV=1	0.00115207	4.25797	4.51264	2	2	2	1	554	60.898	9.2	High	High	High	High	High	High	High	High	High	Phospho [T198(100)]	1	1.19568	0.894548	1.32815	0.888692	0.867839	1.65346	1.57993	1.51641	1	1	1	1	1	1	1	1	1	0.072	0	3.2725	1
FALSE	High	Master Protein	Q5JK68	Cyclin-dependent kinase C-2 OS=Oryza sativa subsp. japonica GN=CDKC-2 PE=2 SV=1	0.00115207	4.25485	2.53411	1	1	1	1	513	56.79	9.11	High	High	High	High	High	High	High	High	High	Phospho [S67(99)]	1	1.11955	1.18447	1.22944	1.01737	1.03887	1.63831	1.79892	1.92416	1	1	1	1	1	1	1	1	1	0.179	0	2.79652	1
FALSE	High	Master Protein	Q0DT06	Os03g0277100 protein (Fragment) OS=Oryza sativa subsp. japonica GN=Os03g0277100 PE=4 SV=1	0.00115207	4.24413	7.43802	1	2	1	1	242	26.885	6.68	High	High	High	High	High	High	High	High	High	Phospho [S1086(100)]	1	1.23729	0.767709	1.10337	0.812289	0.834611	0.778434	0.823102	0.838427	1	1	1	1	1	1	1	1	1	0.036	0	9.96842	1
FALSE	High	Master Protein	Q7G8Y3	Probable chromatin-remodeling complex ATPase chain OS=Oryza sativa subsp. japonica GN=Os01g0367900 PE=2 SV=2	0.00115207	4.24336	1.17435	1	3	1	1	1107	127.556	5.3	High	High	High	High	High	High	High	High	High	Phospho [S70(100); T121(100)]	1	1.19872	1.04332	0.940159	0.772076	0.786723	0.96594	0.914345	1.07246	2	2	2	2	2	2	2	2	2	0.222	0	12.479	2
FALSE	High	Master Protein	A0A0P0X7K0	Os07g0564700 protein (Fragment) OS=Oryza sativa subsp. japonica GN=Os07g0564700 PE=4 SV=1	0.00115207	4.2373	8.72093	2	5	2	1	344	37.834	5.68	High	High	High	High	High	High	High	High	High	Phospho [S290(100)]	1	1.04546	0.97561	1.1063	1.03547	0.979251	1.03034	0.932593	0.922873	1	1	1	1	1	1	1	1	1	0.093	0	9.647	1
FALSE	High	Master Protein	Q6Z8I8	Os02g0752000 protein OS=Oryza sativa subsp. japonica GN=Os02g0752000 PE=4 SV=1	0.00115207	4.23218	2.91005	1	5	1	1	378	42.329	5.22	High	High	High	High	High	High	High	High	High	Phospho [S278(100)]	1	1.11955	1.12629	1.16396	1.03145	1.04082	1.56729	1.52999	1.51761	1	1	1	1	1	1	1	1	1	0.086	0	10.2153	1
FALSE	High	Master Protein	Q6K6X2	Os02g0610400 protein OS=Oryza sativa subsp. japonica GN=Os02g0610400 PE=2 SV=1	0.00115207	4.22534	2.35546	1	3	1	1	467	51.658	5.72	High	High	High	High	High	High	High	High	High	Phospho [S218(100); S219(100)]	1	1.10027	1.02139	1.07307	1.00732	1.03496	1.77657	1.50214	1.7987	1	1	1	1	1	1	1	1	1	0.08	0	16.2129	1
FALSE	High	Master Protein	Q0IXM4	Os10g0422000 protein (Fragment) OS=Oryza sativa subsp. japonica GN=Os10g0422000 PE=4 SV=1	0.00115207	4.22178	2.38095	1	6	1	1	420	47.078	6.49	High	High	High	High	High	High	High	High	High	Phospho [S214(100)]	1	0.85971	0.813485	0.907908	0.701705	0.626447	0.850406	0.670391	0.905983	1	1	1	1	1	1	1	1	1	0.212	0	3.15008	1
FALSE	High	Master Protein	Q7XDP6	Os10g0457000 protein OS=Oryza sativa subsp. japonica GN=LOC_Os10g31900 PE=2 SV=1	0.00115207	4.21517	3.09859	1	1	1	1	355	38.824	8.54	High	High	High	High	High	High	High	High	High	Phospho [S605(100)]	1	1.05865	1.14823	1.09946	1.22044	0.907908	1.35326	1.21112	1.11107	1	1	1	1	1	1	1	1	1	0.032	0	2.82929	1
FALSE	High	Master Protein	Q8GU81	MDR-like ABC transporter OS=Oryza sativa subsp. japonica GN=mdr17 PE=4 SV=1	0.00115207	4.21353	1.13452	1	2	1	1	1234	134.487	8.63	High	High	High	High	High	High	High	High	High	Phospho [S597(100)]	1	1.18857	1.10626	0.935272	0.843453	0.806269	1.00571	1.10355	1.21723	1	1	1	1	1	1	1	1	1	0.222	0	12.3575	1
FALSE	High	Master Protein	Q6Z0T2	Os08g0556000 protein OS=Oryza sativa subsp. japonica GN=Os08g0556000 PE=4 SV=1	0.00115207	4.19649	1.44231	1	6	1	1	624	68.224	5.29	High	High	High	High	High	High	High	High	High	Phospho [S53(100)]	1	1.01399	1.07956	0.876635	0.693662	0.686062	1.00761	0.845193	0.869792	1	1	1	1	1	1	1	1	1	0.292	0	6.81693	1
FALSE	High	Master Protein	Q6ERT7	Os02g0269000 protein OS=Oryza sativa subsp. japonica GN=Os02g0269000 PE=4 SV=1	0.00115207	4.18449	8.24742	1	2	1	1	291	32.198	7.24	High	High	High	High	High	High	High	High	High	Phospho [S56(100)]	1	1.10128	1.1549	1.11021	1.04753	1.01639	1.23299	1.24186	1.21964	1	1	1	1	1	1	1	1	1	0.468	0	9.49342	1
FALSE	High	Master Protein	A0A0P0WD30	Os04g0546400 protein (Fragment) OS=Oryza sativa subsp. japonica GN=Os04g0546400 PE=4 SV=1	0.00115207	4.16412	11.5044	1	3	1	1	113	13.009	9.77	High	High	High	High	High	High	High	High	High	Phospho [S89(100)]	1	1.4474	0.920297	1.11216	0.947	0.891294	1.36747	1.17174	1.48625	1	1	1	1	1	1	1	1	1	0.166	0	5.16161	1
FALSE	High	Master Protein	Q2R1S1	Harpin binding protein 1, putative, expressed OS=Oryza sativa subsp. japonica GN=LOC_Os11g38260 PE=2 SV=1	0.00115207	4.16065	4.07407	1	3	1	1	270	28.357	8.79	High	High	High	High	High	High	High	High	High	Phospho [S645(100)]	1	1.08504	1.00994	0.999774	0.855517	0.866862	0.901544	0.795249	0.875824	1	1	1	1	1	1	1	1	1	0.108	0	12.5348	1
FALSE	High	Master Protein	Q6ETI1	Os02g0159200 protein OS=Oryza sativa subsp. japonica GN=Os02g0159200 PE=2 SV=1	0.00115207	4.15498	1.18519	1	5	1	1	675	76.582	9.13	High	High	High	High	High	High	High	High	High	Phospho [S248(99.5)]	1	1.0079	0.917436	1.11509	0.960069	0.930386	1.25762	1.09299	1.28116	1	1	1	1	1	1	1	1	1	0.259	0	7.68657	1
FALSE	High	Master Protein	Q0J0U2	Os09g0499000 protein OS=Oryza sativa subsp. japonica GN=Os09g0499000 PE=2 SV=1	0.00115207	4.13359	5.40541	1	3	1	1	259	27.599	4.7	High	High	High	High	High	High	High	High	High	Phospho [S388(100)]	1	1.12767	1.13869	1.17666	1.44262	1.11803	1.7188	1.33886	1.69736	1	1	1	1	1	1	1	1	1	0.072	0	3.17602	1
FALSE	High	Master Protein	Q10GG7	H1flk, putative, expressed OS=Oryza sativa subsp. japonica GN=LOC_Os03g43010 PE=2 SV=1	0.00115207	4.11345	4.92701	1	1	1	1	548	59.661	7.02	High	High	High	High	High	High	High	High	High	Phospho [S209(100)]	1	1.10433	0.992776	1.0115	0.945995	0.906931	0.859876	0.887452	0.778108	1	1	1	1	1	1	1	1	1	0.389	0	22.4515	1
FALSE	High	Master Protein	Q6ETX5	Reticulon-like protein OS=Oryza sativa subsp. japonica GN=P0006C08.29-1 PE=2 SV=1	0.00115207	4.11345	3.47826	1	9	1	1	230	25.131	8.54	High	High	High	High	High	High	High	High	High	Phospho [S183(100)]	1	1.30124	1.31321	1.33303	1.27775	1.2871	1.31917	1.33886	1.55863	1	1	1	1	1	1	1	1	1	0.047	0	3.74321	1
FALSE	High	Master Protein	Q9LI02	Os06g0111400 protein OS=Oryza sativa subsp. japonica GN=Os06g0111400 PE=2 SV=1	0.00115207	4.10298	1.61476	1	1	1	1	867	97.767	5.71	High	High	High	High	High	High	High	High	High	Phospho [S200(100)]	1	0.9673	1.00708	0.995865	0.823347	0.908885	1.17144	1.16022	1.29082	1	1	1	1	1	1	1	1	1	0.212	0	5.24651	1
FALSE	High	Master Protein	Q6YW53	CASP-like protein 2D1 OS=Oryza sativa subsp. japonica GN=Os02g0219900 PE=2 SV=1	0.00115207	4.10056	6.96517	1	2	1	1	201	21.663	5.63	High	High	High	High	High	High	High	High	High	Phospho [S516(100)]	1	1.11549	1.10912	0.988046	0.874618	0.933318	1.11367	1.06706	1.32218	1	1	1	1	1	1	1	1	1	0.083	0	2.56794	1
FALSE	High	Master Protein	Q6K9X9	Acyl-CoA binding protein-like OS=Oryza sativa subsp. japonica GN=Os02g0822800 PE=4 SV=1	0.00115207	4.08045	2.31214	1	1	1	1	519	56.62	5.9	High	High	High	High	High	High	High	High	High	Phospho [S98(99.4)]	1	1.35808	1.13297	1.22748	1.14505	1.01052	1.46311	1.51654	1.45609	1	1	1	1	1	1	1	1	1	0.233	0	2.8521	1
FALSE	High	Master Protein	Q94GF4	Expressed protein OS=Oryza sativa subsp. japonica GN=OJ1111_B11.6 PE=2 SV=1	0.00115207	4.07469	12.5874	1	1	1	1	143	15.401	7.65	High	High	High	High	High	High	High	High	High	Phospho [S81(100); S85(100)]	1	0.96324	0.798227	0.956773	0.835411	0.955796	0.995297	1.14005	1.20275	1	1	1	1	1	1	1	1	1	0.166	0	5.92551	1
FALSE	High	Master Protein	Q8S5W6	Expressed protein OS=Oryza sativa subsp. japonica GN=LOC_Os03g03440 PE=4 SV=1	0.00115207	4.06158	7.32759	1	3	1	1	232	24.78	10.27	High	High	High	High	High	High	High	High	High	Phospho [S53(100); S58(100)]	1	0.97136	0.925065	1.22944	1.04653	1.08871	1.28129	1.26011	1.34148	1	1	1	1	1	1	1	1	1	0.172	0	4.65125	1
FALSE	High	Master Protein	Q69IL7	Os09g0515800 protein OS=Oryza sativa subsp. japonica GN=Os09g0515800 PE=2 SV=1	0.00115207	4.06132	2.7027	1	4	1	1	444	50.743	6.3	High	High	High	High	High	High	High	High	High	Phospho [S429(100); S431(100)]	1	0.982525	0.698091	0.82777	0.547893	0.733949	0.70078	0.803894	0.690043	1	1	1	1	1	1	1	1	1	0.058	0	3.61648	1
FALSE	High	Master Protein	Q0DP45	Os03g0717000 protein (Fragment) OS=Oryza sativa subsp. japonica GN=Os03g0717000 PE=3 SV=1	0.00115207	4.05527	1.18765	1	1	1	1	842	89.64	5.77	High	High	High	High	High	High	High	High	High	Phospho [Y462(99); S463(99)]	1	1.17335	1.12724	0.942114	0.972133	1.05157	1.17523	1.13237	1.34028	1	1	1	1	1	1	1	1	1	0.072	0	2.64532	1
FALSE	High	Master Protein	Q0D802	Os07g0193600 protein (Fragment) OS=Oryza sativa subsp. japonica GN=Os07g0193600 PE=4 SV=1	0.00115207	4.04697	2.87162	1	1	1	1	592	67.857	4.82	High	High	High	High	High	High	High	High	High	Phospho [S13(99.6)]	1	0.937865	1.14918	0.971432	0.821337	1.00075	1.19796	1.23994	1.36561	1	1	1	1	1	1	1	1	1	0.179	0	8.97239	1
FALSE	High	Master Protein	Q9FNZ8	Os06g0275800 protein OS=Oryza sativa subsp. japonica GN=Os06g0275800 PE=2 SV=1	0.00115207	4.03536	2.90179	1	6	1	1	448	48.09	7.27	High	High	High	High	High	High	High	High	High	Phospho [S98(100); S102(100); S195(100); T199(100)]	1	1.07286	1.11771	0.992933	0.948005	0.933318	1.23962	1.12372	1.12072	2	2	2	2	2	2	2	2	2	0.259	0	12.6891	2
FALSE	High	Master Protein	A0A0P0V5R2	CASP-like protein OS=Oryza sativa subsp. japonica GN=Os01g0640700 PE=3 SV=1	0.00115207	4.03314	4.038	2	5	2	1	421	44.211	8.91	High	High	High	High	High	High	High	High	High	Phospho [S410(99.5)]	1	0.98557	0.709535	0.764246	0.745938	0.707562	0.945106	1.06225	1.27393	1	1	1	1	1	1	1	1	1	0.155	0	2.86494	1
FALSE	High	Master Protein	A0A0P0V159	Os01g0289600 protein OS=Oryza sativa subsp. japonica GN=Os01g0289600 PE=4 SV=1	0.00115207	4.02872	2.43309	1	1	1	1	411	42.541	10.93	High	High	High	High	High	High	High	High	High	Phospho [S510(100)]	1	1.02008	0.906946	1.07698	0.870597	0.996842	1.39967	1.21881	1.35837	1	1	1	1	1	1	1	1	1	0.059	0	7.68251	1
FALSE	High	Master Protein	Q6K741	Os02g0475300 protein OS=Oryza sativa subsp. japonica GN=P0419C03.10-1 PE=4 SV=1	0.00115207	4.02132	1.89274	1	3	1	1	634	69.029	9.11	High	High	High	High	High	High	High	High	High	Phospho [S722(100)]	1	0.994705	0.864984	0.705608	0.89774	0.677266	1.20742	1.11892	1.29685	1	1	1	1	1	1	1	1	1	0.056	0	3.14944	1
FALSE	High	Master Protein	Q8W3C9	Serine/threonine-protein kinase OS=Oryza sativa subsp. japonica GN=Os10g0101000 PE=3 SV=1	0.00115207	4.01073	1.59902	1	1	1	1	813	89.612	6.74	High	High	High	High	High	High	High	High	High	Phospho [S88(100)]	1	1.20481	0.896455	1.17276	0.995255	0.922568	1.8637	1.41474	1.9314	1	1	1	1	1	1	1	1	1	0.389	0	8.50886	1
FALSE	High	Master Protein	Q6YZI5	Os08g0558900 protein OS=Oryza sativa subsp. japonica GN=Os08g0558900 PE=2 SV=1	0.00115207	4.00542	16.8539	1	6	1	1	89	9.801	9.7	High	High	High	High	High	High	High	High	High	Phospho [S111(99.6)]	1	1.13173	0.903131	0.86393	1.02944	1.02714	1.14871	1.38784	1.37285	1	1	1	1	1	1	1	1	1	0.334	0	5.6478	1
FALSE	High	Master Protein	A0A0N7KCJ7	Os01g0214300 protein (Fragment) OS=Oryza sativa subsp. japonica GN=Os01g0214300 PE=4 SV=1	0.00115207	3.98213	8.43373	1	4	1	1	166	18.244	4.42	High	High	High	High	High	High	High	High	High	Phospho [T161(100)]	1	1.2718	1.13487	1.15028	1.26568	1.22748	1.96124	1.83253	2.25953	1	1	1	1	1	1	1	1	1	0.045	0	5.53684	1
FALSE	High	Master Protein	Q67WN8	Probable sucrose-phosphate synthase 3 OS=Oryza sativa subsp. japonica GN=SPS3 PE=2 SV=1	0.00115207	3.9751	2.14944	1	2	1	1	977	109.393	7.24	High	High	High	High	High	High	High	High	High	Phospho [S422(100)]	1	0.958165	1.04523	1.13171	1.14605	1.0633	1.07863	1.18039	1.1364	1	1	1	1	1	1	1	1	1	0.093	0	8.27917	1
FALSE	High	Master Protein	A0A0P0WYD6	Os06g0602700 protein OS=Oryza sativa subsp. japonica GN=Os06g0602700 PE=3 SV=1	0.00115207	3.96257	2.36407	1	3	1	1	423	45.728	8.85	High	High	High	High	High	High	High	High	High	Phospho [S285(100)]	1	1.05358	1.04523	1.16494	1.20235	1.12194	0.902491	1.10259	1.20637	1	1	1	1	1	1	1	1	1	0.075	0	3.38343	1
FALSE	High	Master Protein	Q2QNK1	Phosphoinositide phospholipase C OS=Oryza sativa subsp. japonica GN=Os12g0562400 PE=4 SV=2	0.00115207	3.95273	3.22034	1	1	1	1	590	65.472	6.89	High	High	High	High	High	High	High	High	High	Phospho [S200(100)]	1	0.92061	1.00041	0.843407	0.899751	0.939182	0.81442	0.886492	0.763632	1	1	1	1	1	1	1	1	1	0.389	0	11.4319	1
FALSE	High	Master Protein	Q0J8W7	Os04g0683900 protein OS=Oryza sativa subsp. japonica GN=Os04g0683900 PE=2 SV=1	0.00115207	3.94352	1.90931	1	7	1	1	419	42.813	9.79	High	High	High	High	High	High	High	High	High	Phospho [S278(100)]	1	1.05053	0.802995	0.97241	0.845464	0.814088	1.1989	1.11412	1.41869	2	2	2	2	2	2	2	2	2	0.274	0	3.50395	1
FALSE	High	Master Protein	A0A0P0WPY5	Os05g0541700 protein (Fragment) OS=Oryza sativa subsp. japonica GN=Os05g0541700 PE=4 SV=1	0.00115207	3.92664	3.55872	1	5	1	1	281	30.781	11.22	High	High	High	High	High	High	High	High	High	Phospho [S37(100); S42(100)]	1	0.96527	1.01185	0.999774	0.976154	0.945045	1.10326	1.13141	1.07246	1	1	1	1	1	1	1	1	1	0.077	0	3.35276	1
FALSE	High	Master Protein	Q53PH5	Invertase, putative OS=Oryza sativa subsp. japonica GN=LOC_Os11g07440 PE=4 SV=1	0.00115207	3.91865	2.37226	1	1	1	1	548	62.682	6.43	High	High	High	High	High	High	High	High	High	Phospho [S145(98.9)]	1	1.06677	1.06049	1.25094	0.997265	0.953841	1.13072	0.916266	1.08694	1	1	1	1	1	1	1	1	1	0.212	0	7.27071	1
FALSE	High	Master Protein	A0A0P0VFU8	Os02g0186700 protein (Fragment) OS=Oryza sativa subsp. japonica GN=Os02g0186700 PE=4 SV=1	0.00115207	3.91829	6.84932	1	3	1	1	219	24.432	9.03	High	High	High	High	High	High	High	High	High	Phospho [S335(100); S339(99.3)]	1	1.06068	0.899316	0.860998	0.808268	1.08382	1.09	1.14677	1.26548	1	1	1	1	1	1	1	1	1	0.044	0	3.1848	1
FALSE	High	Master Protein	Q6ESH1	Os02g0666300 protein OS=Oryza sativa subsp. japonica GN=Os02g0666300 PE=2 SV=1	0.00115207	3.89894	1.34228	1	2	1	1	894	97.306	9.42	High	High	High	High	High	High	High	High	High	Phospho [S28(99.1)]	1	1.09215	0.98324	0.952864	0.877634	0.837543	0.967834	1.10643	1.08453	1	1	1	1	1	1	1	1	1	0.259	0	3.09843	1
FALSE	High	Master Protein	Q8W0I1	Os01g0673600 protein OS=Oryza sativa subsp. japonica GN=Os01g0673600 PE=2 SV=1	0.00115207	3.89483	12.4183	1	2	1	1	153	17.149	7.34	High	High	High	High	High	High	High	High	High	Phospho [S184(100); S188(100)]	1	1.13579	1.00517	0.839497	0.855517	0.872725	0.754759	0.789487	0.801029	1	1	1	1	1	1	1	1	1	0.032	0	17.547	1
FALSE	High	Master Protein	A0A0P0VD31	Os01g0952300 protein OS=Oryza sativa subsp. japonica GN=Os01g0952300 PE=4 SV=1	0.00115207	3.88273	0.874891	1	6	1	1	1143	123.788	8.84	High	High	High	High	High	High	High	High	High	Phospho [S126(100)]	1	1.05053	0.71621	0.725154	0.710753	0.690948	0.834307	0.856718	0.858935	1	1	1	1	1	1	1	1	1	0.089	0	5.48278	1
FALSE	High	Master Protein	Q9FWC4	Os10g0520600 protein OS=Oryza sativa subsp. japonica GN=Os10g0520600 PE=2 SV=1	0.00115207	3.88074	3.64807	1	2	1	1	466	51.032	5.07	High	High	High	High	High	High	High	High	High	Phospho [S133(100)]	1	1.26267	1.00613	1.11314	0.955042	0.975342	0.901544	0.898978	0.926492	1	1	1	1	1	1	1	1	1	0.389	0	3.3847	1
FALSE	High	Master Protein	Q0JBH9	Elicitor-responsive protein 3 OS=Oryza sativa subsp. japonica GN=ERG3 PE=2 SV=1	0.00115207	3.87844	7.63889	1	1	1	1	144	15.859	4.35	High	High	High	High	High	High	High	High	High	Phospho [S462(100)]	1	1.25353	1.07765	1.04668	0.885676	0.772064	1.2633	1.08338	1.38009	1	1	1	1	1	1	1	1	1	0.041	0	8.34938	1
FALSE	High	Master Protein	A0A0P0VJP8	Gamma-tubulin complex component (Fragment) OS=Oryza sativa subsp. japonica GN=Os02g0523300 PE=3 SV=1	0.00115207	3.87419	1.64569	1	3	1	1	1033	116.273	5.53	High	High	High	High	High	High	High	High	High	Phospho [S272(100)]	1	1.11651	1.37234	1.0203	0.836416	0.933318	0.872187	0.771238	1.1364	1	1	1	1	1	1	1	1	1	0.061	0	5.52142	1
FALSE	High	Master Protein	Q10G00	Expressed protein OS=Oryza sativa subsp. japonica GN=Os03g0649000 PE=4 SV=1	0.00115207	3.87354	1.40306	1	2	1	1	784	86.038	5.25	High	High	High	High	High	High	High	High	High	Phospho [S387(99.5)]	1	1.21192	1.32084	0.997819	1.11187	1.05353	1.2311	1.03536	1.22808	1	1	1	1	1	1	1	1	1	0.105	0	3.51092	1
FALSE	High	Master Protein	Q8H7W2	C2 domain-containing protein, putative, expressed OS=Oryza sativa subsp. japonica GN=LOC_Os03g09840 PE=2 SV=1	0.00115207	3.85855	6.96517	1	1	1	1	402	43.837	4.69	High	High	High	High	High	High	High	High	High	Phospho [S299(100)]	1	0.8861	0.636102	0.627424	0.679588	0.629379	0.736766	0.884571	1.15691	1	1	1	1	1	1	1	1	1	0.089	0	12.4311	1
FALSE	High	Master Protein	Q7XQH8	OSJNBa0067K08.18 protein OS=Oryza sativa subsp. japonica GN=Os04g0497600 PE=2 SV=2	0.00115207	3.85387	3.44828	1	6	1	1	435	48.266	5.68	High	High	High	High	High	High	High	High	High	Phospho [S212(100)]	1	1.22917	1.14155	1.5754	1.18526	1.28417	1.25667	1.21496	1.19069	1	1	1	1	1	1	1	1	1	0.15	0	28.8146	1
FALSE	High	Master Protein	Q6YYV1	Polyadenylate-binding protein OS=Oryza sativa subsp. japonica GN=Os09g0115400 PE=2 SV=1	0.00115207	3.84568	1.20846	1	10	1	1	662	71.584	6.83	High	High	High	High	High	High	High	High	High	Phospho [S340(100)]	1	1.10737	1.13201	1.18546	0.938958	1.08284	1.14871	1.04304	1.1557	1	1	1	1	1	1	1	1	1	0.122	0	3.39615	1
FALSE	High	Master Protein	Q67UP9	Probable protein phosphatase 2C 58 OS=Oryza sativa subsp. japonica GN=Os06g0651600 PE=2 SV=1	0.00115207	3.83416	3.26087	1	1	1	1	368	40.565	5.1	High	High	High	High	High	High	High	High	High	Phospho [S367(100)]	1	1.06576	1.08528	1.06818	0.939963	0.896181	0.773699	0.79717	0.601978	1	1	1	1	1	1	1	1	1	0.086	0	6.58501	1
FALSE	High	Master Protein	Q652G4	Os06g0256300 protein OS=Oryza sativa subsp. japonica GN=Os06g0256300 PE=4 SV=1	0.00115207	3.82886	1.98675	1	2	1	1	453	51.081	7.77	High	High	High	High	High	High	High	High	High	Phospho [S322(100)]	1	1.16421	0.949861	1.47963	1.24457	1.11705	2.12791	1.61067	2.24023	1	1	1	1	1	1	1	1	1	0.136	0	7.7473	1
FALSE	High	Master Protein	Q6YYJ6	Os08g0172200 protein OS=Oryza sativa subsp. japonica GN=OJ1590_E05.35-1 PE=4 SV=1	0.00115207	3.82857	4.79042	1	3	1	1	334	37.938	5.95	High	High	High	High	High	High	High	High	High	Phospho [S160(99.2)]	1	1.37838	1.12057	1.41806	1.31293	1.16298	1.30023	1.39361	1.06643	1	1	1	1	1	1	1	1	1	0.179	0	2.61005	1
FALSE	High	Master Protein	Q6ZGL6	Peptidyl-prolyl cis-trans isomerase OS=Oryza sativa subsp. japonica GN=Os02g0117600 PE=2 SV=1	0.00115207	3.78888	6.61157	1	1	1	1	242	25.785	9.32	High	High	High	High	High	High	High	High	High	Phospho [S427(100)]	1	1.04038	0.935556	1.25778	1.57733	1.48158	1.61179	1.46564	1.40904	1	1	1	1	1	1	1	1	1	0.08	0	9.07941	1
FALSE	High	Master Protein	Q10E42	Os03g0708900 protein OS=Oryza sativa subsp. japonica GN=LOC_Os03g50120 PE=2 SV=1	0.00115207	3.78835	3.96825	1	3	1	1	504	55.714	8.07	High	High	High	High	High	High	High	High	High	Phospho [S204(100)]	1	1.04749	0.917436	0.867839	0.826363	0.787701	0.881657	0.827905	0.7576	2	2	2	2	2	2	2	2	2	0.585	0	9.16245	2
FALSE	High	Master Protein	B9FHM5	Reticulon-like protein OS=Oryza sativa subsp. japonica GN=Os05g0550250 PE=4 SV=1	0.00115207	3.78689	4.09091	2	4	2	1	220	24.729	8.87	High	High	High	High	High	High	High	High	High	Phospho [S99(100)]	1	0.98354	0.860216	1.12096	1.07769	1.03789	0.857982	1.03056	0.889094	1	1	1	1	1	1	1	1	1	0.11	0	16.4364	1
FALSE	High	Master Protein	Q2QZL4	Splicing factor U2af large subunit B OS=Oryza sativa subsp. japonica GN=U2AF65B PE=3 SV=2	0.00115207	3.77702	1.45985	1	8	1	1	548	61.322	9.1	High	High	High	High	High	High	High	High	High	Phospho [S678(100)]	1	1.05662	1.00327	0.95775	0.91483	0.916704	1.2614	1.18135	1.37405	1	1	1	1	1	1	1	1	1	0.15	0	2.72801	1
FALSE	High	Master Protein	Q6YWQ4	Potassium transporter 25 OS=Oryza sativa subsp. japonica GN=HAK25 PE=2 SV=1	0.00167598	3.76891	1.42857	1	2	1	1	770	85.484	8.47	High	High	High	High	High	High	High	High	High	Phospho [S193(100)]	1	0.89219	0.861169	0.930386	0.839432	0.793564	1.25667	1.11028	1.50917	1	1	1	1	1	1	1	1	1	0.122	0	3.61319	1
FALSE	High	Master Protein	A0A0P0XLI9	Os09g0410125 protein (Fragment) OS=Oryza sativa subsp. japonica GN=Os09g0410125 PE=4 SV=1	0.00167598	3.76397	5.90062	1	1	1	1	322	36.6	7.59	High	High	High	High	High	High	High	High	High	Phospho [S89(99.3)]	1	1.16523	1.07956	1.18741	1.11891	0.855134	1.37599	1.13333	1.31253	1	1	1	1	1	1	1	1	1	0.468	0	5.10633	1
FALSE	High	Master Protein	Q5VRM0	Os06g0115300 protein OS=Oryza sativa subsp. japonica GN=Os06g0115300 PE=2 SV=1	0.00167598	3.7469	12.0879	1	6	1	1	91	10.242	5.05	High	High	High	High	High	High	High	High	High	Phospho [S10(100)]	1	1.17132	1.08433	1.37017	1.39235	1.36431	1.56634	1.49061	1.63101	2	2	2	2	2	2	2	2	2	0.068	0	15.9952	1
FALSE	High	Master Protein	Q8H4V1	Os08g0366000 protein OS=Oryza sativa subsp. japonica GN=OJ1484_G09.129-1 PE=2 SV=1	0.00167598	3.74253	0.93361	1	7	1	1	964	109.986	5.8	High	High	High	High	High	High	High	High	High	Phospho [S93(100)]	1	0.99775	0.829698	1.02909	0.911814	0.856111	1.26519	1.0392	1.33907	1	1	1	1	1	1	1	1	1	0.334	0	7.95095	1
FALSE	High	Master Protein	Q0IN32	Os12g0510900 protein (Fragment) OS=Oryza sativa subsp. japonica GN=Os12g0510900 PE=4 SV=1	0.00167598	3.73424	13.8614	1	3	1	1	101	11.304	7.42	High	High	High	High	High	High	High	High	High	Phospho [S925(100)]	1	0.8658	0.894548	3.25049	3.54572	2.47745	6.38657	5.852	5.70492	1	1	1	1	1	1	1	1	1	0.043	0	2.38482	1
FALSE	High	Master Protein	Q7XX94	OSJNBa0040D17.15 protein OS=Oryza sativa subsp. japonica GN=Os04g0195000 PE=4 SV=2	0.00167598	3.69379	2.21286	1	1	1	1	949	106.134	5.35	High	High	High	High	High	High	High	High	High	Phospho [S757(100)]	1	0.917565	1.03188	0.912795	1.13499	0.958728	1.4347	1.48005	1.20034	1	1	1	1	1	1	1	1	1	0.043	0	4.77551	1
FALSE	High	Master Protein	Q7EYN1	Os08g0379000 protein OS=Oryza sativa subsp. japonica GN=Os08g0379000 PE=4 SV=1	0.00167598	3.66857	1.03359	1	2	1	1	1161	132.676	5.47	High	High	High	High	High	High	High	High	High	Phospho [S380(100)]	1	1.22613	0.813485	1.90866	1.38029	1.07307	1.12882	0.929712	1.11107	1	1	1	1	1	1	1	1	1	0.054	0	5.45762	1
FALSE	High	Master Protein	Q10K10	Os03g0401100 protein OS=Oryza sativa subsp. japonica GN=Os03g0401100 PE=4 SV=1	0.00167598	3.62856	1.73228	1	2	1	1	635	71.102	8.25	High	High	High	High	High	High	High	High	High	Phospho [S106(100)]	1	0.9876	1.1158	1.16298	1.10684	1.04864	1.66293	1.28316	1.78543	1	1	1	1	1	1	1	1	1	0.292	0	2.8943	1
FALSE	High	Master Protein	A0A0P0VPT6	Os02g0740500 protein (Fragment) OS=Oryza sativa subsp. japonica GN=Os02g0740500 PE=4 SV=1	0.00167598	3.6269	10.4	1	1	1	1	125	14.155	6.04	High	High	High	High	High	High	High	High	High	Phospho [S16(99.1)]	1	0.99369	0.834466	0.774019	1.07467	0.836566	0.987721	0.96813	0.89392	1	1	1	1	1	1	1	1	1	0.136	0	3.25682	1
FALSE	High	Master Protein	Q0DE33	Os06g0181100 protein (Fragment) OS=Oryza sativa subsp. japonica GN=Os06g0181100 PE=4 SV=1	0.00167598	3.6269	2.99401	1	1	1	1	501	52.083	6.04	High	High	High	High	High	High	High	High	High	Phospho [S387(99.7)]	1	1.22308	0.971796	0.878589	0.684615	0.707562	0.711197	0.740504	0.786553	1	1	1	1	1	1	1	1	1	0.089	0	8.61012	1
FALSE	High	Master Protein	Q6Z7S3	Os02g0741100 protein OS=Oryza sativa subsp. japonica GN=Os02g0741100 PE=2 SV=1	0.00167598	3.61816	2.48869	1	4	1	1	442	49.295	8.82	High	High	High	High	High	High	High	High	High	Phospho [S13(100)]	1	1.0485	0.98324	0.990978	0.654455	0.733949	1.4205	1.26395	2.07737	1	1	1	1	1	1	1	1	1	0.064	0	4.3744	1
FALSE	High	Master Protein	Q7F1M0	ATP-dependent DNA helicase 2 subunit KU70 OS=Oryza sativa subsp. japonica GN=KU70 PE=1 SV=1	0.00167598	3.61404	2.08333	1	2	1	1	624	70.013	5.62	High	High	High	High	High	High	High	High	High	Phospho [S49(100)]	1	1.15102	0.780107	0.925499	1.02139	1.01932	1.56444	1.25338	1.48987	1	1	1	1	1	1	1	1	1	0.064	0	2.59801	1
FALSE	High	Master Protein	Q0DVU4	Zinc finger CCCH domain-containing protein 20 OS=Oryza sativa subsp. japonica GN=Os03g0112700 PE=2 SV=1	0.00167598	3.58021	2.54597	1	1	1	1	707	76.092	4.61	High	High	High	High	High	High	High	High	High	Phospho [S267(100); S271(100)]	1	1.24541	1.12534	1.41024	1.1551	1.28221	1.5474	1.73072	1.44282	1	1	1	1	1	1	1	1	1	0.061	0	6.38282	1
FALSE	High	Master Protein	A0A0P0Y808	Os12g0209700 protein (Fragment) OS=Oryza sativa subsp. japonica GN=Os12g0209700 PE=4 SV=1	0.00167598	3.57025	2.4911	1	2	1	1	562	61.075	6.51	High	High	High	High	High	High	High	High	High	Phospho [S472(100); S480(99.3)]	1	1.05155	0.779153	0.843407	0.838427	0.852202	0.971622	1.04785	1.03265	1	1	1	1	1	1	1	1	1	0.043	0	12.0217	1
FALSE	High	Master Protein	A0A0P0VY74	Os03g0347300 protein (Fragment) OS=Oryza sativa subsp. japonica GN=Os03g0347300 PE=4 SV=1	0.00167598	3.56559	1.40237	1	4	1	1	927	102.147	8.9	High	High	High	High	High	High	High	High	High	Phospho [S304(100)]	1	1.0414	1.13392	1.07112	0.900756	0.86393	0.892074	0.887452	0.985604	1	1	1	1	1	1	1	1	1	0.389	0	13.9646	1
FALSE	High	Master Protein	Q6ZD62	Os08g0108300 protein OS=Oryza sativa subsp. japonica GN=Os08g0108300 PE=2 SV=1	0.00167598	3.55635	2.63158	1	6	1	1	342	36.708	10.17	High	High	High	High	High	High	High	High	High	Phospho [S425(100)]	1	0.88001	0.860216	0.999774	1.00129	1.11509	1.36841	1.20824	1.43679	1	1	1	1	1	1	1	1	1	0.075	0	3.63311	1
FALSE	High	Master Protein	Q5Z880	ERAD-associated E3 ubiquitin-protein ligase HRD1 OS=Oryza sativa subsp. japonica GN=HRD1 PE=2 SV=1	0.00167598	3.54333	5	1	1	1	1	500	56.226	8.34	High	High	High	High	High	High	High	High	High	Phospho [S75(100)]	1	1.2515	1.47629	1.20207	1.31092	1.34671	1.39588	1.39073	1.95311	1	1	1	1	1	1	1	1	1	0.233	0	2.9907	1
FALSE	High	Master Protein	A0A0P0XVX8	Os10g0481450 protein (Fragment) OS=Oryza sativa subsp. japonica GN=Os10g0481450 PE=4 SV=1	0.00167598	3.54016	3.67347	1	1	1	1	245	25.397	7.18	High	High	High	High	High	High	High	High	High	Phospho [S187(99)]	1	1.06982	0.956537	1.03691	1.0425	0.953841	1.15913	0.983497	1.12072	1	1	1	1	1	1	1	1	1	0.292	0	2.70222	1
FALSE	High	Master Protein	B9GDC7	Os12g0508266 protein OS=Oryza sativa subsp. japonica GN=Os12g0508266 PE=4 SV=1	0.00167598	3.53462	10.1604	1	10	1	1	187	19.816	5.52	High	High	High	High	High	High	High	High	High	Phospho [S226(100)]	1	0.913505	0.842096	0.844384	0.846469	0.754473	1.00477	0.917226	0.97354	1	1	1	1	1	1	1	1	1	0.122	0	8.06804	1
FALSE	High	Master Protein	Q7XQG4	OJ000114_01.13 protein OS=Oryza sativa subsp. japonica GN=OJ000114_01.13 PE=4 SV=1	0.00167598	3.52959	3.34347	1	3	1	1	329	37.495	8.66	High	High	High	High	High	High	High	High	High	Phospho [S116(100)]	1	0.976435	0.634194	0.907908	0.724827	0.669448	0.866505	0.828865	1.10383	1	1	1	1	1	1	1	1	1	0.292	0	6.18845	1
FALSE	High	Master Protein	Q60EN2	Os05g0454500 protein OS=Oryza sativa subsp. japonica GN=Os05g0454500 PE=2 SV=1	0.00167598	3.52491	6.94444	1	2	1	1	144	15.275	9.04	High	High	High	High	High	High	High	High	High	Phospho [S231(100); S232(100)]	1	1.03937	0.941278	0.931363	0.789167	0.825815	1.1364	1.07954	1.29082	1	1	1	1	1	1	1	1	1	0.166	0	6.3706	1
FALSE	High	Master Protein	Q7Y1H6	Expressed protein OS=Oryza sativa subsp. japonica GN=OSJNBa0094F01.10 PE=2 SV=1	0.00167598	3.51827	3.14465	1	3	1	1	318	35.937	10.29	High	High	High	High	High	High	High	High	High	Phospho [S121(100)]	1	1.25556	1.12438	1.08284	0.900756	1.10141	1.18091	1.29564	1.39577	1	1	1	1	1	1	1	1	1	0.166	0	6.62653	1
FALSE	High	Master Protein	Q53LU7	Expressed protein OS=Oryza sativa subsp. japonica GN=Os11g0153300 PE=2 SV=1	0.00167598	3.50585	4.97925	1	4	1	1	241	25.337	10.2	High	High	High	High	High	High	High	High	High	Phospho [S785(100)]	1	1.12666	1.04141	1.31935	1.16716	1.15712	1.4991	1.33886	1.73717	1	1	1	1	1	1	1	1	1	0.05	0	2.74714	1
FALSE	High	Master Protein	A0A0P0Y7V1	Os12g0197400 protein (Fragment) OS=Oryza sativa subsp. japonica GN=Os12g0197400 PE=4 SV=1	0.00167598	3.50557	1.65184	1	1	1	1	787	87.629	6.7	High	High	High	High	High	High	High	High	High	Phospho [S169(99.4)]	1	1.17233	0.95749	1.17666	1.11489	0.925499	1.13261	1.03536	1.13037	1	1	1	1	1	1	1	1	1	0.212	0	3.35852	1
FALSE	High	Master Protein	Q8S1Y9	Calmodulin-like protein 1 OS=Oryza sativa subsp. japonica GN=CML1 PE=2 SV=1	0.00167598	3.49675	5.88235	1	1	1	1	187	20.964	4.83	High	High	High	High	High	High	High	High	High	Phospho [S119(100)]	1	1.10737	0.686647	0.882498	0.823347	0.851225	0.967834	0.899938	0.983191	1	1	1	1	1	1	1	1	1	0.166	0	11.7976	1
FALSE	High	Master Protein	Q0E094	Os02g0567900 protein (Fragment) OS=Oryza sativa subsp. japonica GN=Os02g0567900 PE=4 SV=1	0.00167598	3.46699	4.2471	1	9	1	1	259	28.267	9.13	High	High	High	High	High	High	High	High	High	Phospho [S921(100)]	1	1.07286	0.782014	0.879567	0.993244	0.820929	1.07674	0.973892	1.00611	1	1	1	1	1	1	1	1	1	0.064	0	2.34886	1
FALSE	High	Master Protein	Q2R939	Expressed protein OS=Oryza sativa subsp. japonica GN=Os11g0207100 PE=2 SV=2	0.00167598	3.46433	1.7149	1	1	1	1	933	101.238	8.72	High	High	High	High	High	High	High	High	High	Phospho [S509(100)]	1	1.14899	0.884057	1.03105	0.893719	0.823861	1.14019	1.17078	1.17259	1	1	1	1	1	1	1	1	1	0.075	0	14.919	1
FALSE	High	Master Protein	Q6YS30	DEAD-box ATP-dependent RNA helicase 5 OS=Oryza sativa subsp. japonica GN=Os07g0301200 PE=2 SV=1	0.00167598	3.46231	1.75781	1	7	1	1	512	55.588	8.91	High	High	High	High	High	High	High	High	High	Phospho [S49(100)]	1	1.43725	1.29318	1.4894	1.24658	1.37994	1.81635	1.45508	2.34518	1	1	1	1	1	1	1	1	1	0.136	0	3.4521	1
FALSE	High	Master Protein	Q5NBC3	Os01g0252900 protein OS=Oryza sativa subsp. japonica GN=Os01g0252900 PE=2 SV=1	0.00167598	3.46042	8	1	1	1	1	275	31.263	9.36	High	High	High	High	High	High	High	High	High	Phospho [S386(100); S389(100)]	1	1.03734	0.700952	0.944068	0.822342	0.738836	0.802109	0.825023	0.780521	1	1	1	1	1	1	1	1	1	0.101	0	3.49577	1
FALSE	High	Master Protein	Q8RUE8	Os01g0872800 protein OS=Oryza sativa subsp. japonica GN=OSJNBb0008G24.23 PE=4 SV=1	0.00167598	3.45469	2.00803	1	1	1	1	498	55.349	7.01	High	High	High	High	High	High	High	High	High	Phospho [S923(99.3)]	1	1.06271	0.985147	1.1278	0.982186	0.854157	1.9423	1.83157	2.17026	1	1	1	1	1	1	1	1	1	0.036	0	3.36121	1
FALSE	High	Master Protein	Q67VC7	Os06g0237300 protein OS=Oryza sativa subsp. japonica GN=Os06g0237300 PE=4 SV=1	0.00167598	3.44117	1.68841	1	2	1	1	1303	140.367	4.61	High	High	High	High	High	High	High	High	High	Phospho [S244(100); T245(100)]	1	0.95106	0.899316	1.02812	0.862554	0.90009	1.00666	0.913384	1.17018	1	1	1	1	1	1	1	1	1	0.061	0	3.40149	1
FALSE	High	Master Protein	Q5QMD6	DNAJ heat shock N-terminal domain-containing protein-like OS=Oryza sativa subsp. japonica GN=Os01g0521500 PE=4 SV=1	0.00271592	3.43699	3.15091	1	1	1	1	603	67.593	9.11	High	High	High	High	High	High	High	High	High	Phospho [S252(100)]	1	1.11346	1.09482	1.20403	1.04753	1.31153	1.0417	1.07474	0.909603	1	1	1	1	1	1	1	1	1	0.051	0	8.33705	1
FALSE	High	Master Protein	A0A0P0XJ24	Os09g0135400 protein (Fragment) OS=Oryza sativa subsp. japonica GN=Os09g0135400 PE=4 SV=1	0.00271592	3.38416	1.14504	1	3	1	1	786	85.763	6.09	High	High	High	High	High	High	High	High	High	Phospho [S13(100)]	1	0.988615	0.839235	0.805292	0.761018	0.816042	1.02939	0.897057	1.09538	1	1	1	1	1	1	1	1	1	0.212	0	5.86514	1
FALSE	High	Master Protein	B9FJ38	Os05g0223000 protein OS=Oryza sativa subsp. japonica GN=Os05g0223000 PE=4 SV=1	0.00271592	3.38405	6.87831	1	2	1	1	189	19.546	5.21	High	High	High	High	High	High	High	High	High	Phospho [T129(96.8); S136(99.9)]	1	0.777494	1.00327	0.915727	0.736891	0.902044	1.32296	1.09491	1.15329	1	1	1	1	1	1	1	1	1	0.233	0	2.47666	1
FALSE	High	Master Protein	A0A0P0X775	Os07g0524000 protein (Fragment) OS=Oryza sativa subsp. japonica GN=Os07g0524000 PE=4 SV=1	0.00271592	3.37634	9.21659	1	2	1	1	217	23.608	4.74	High	High	High	High	High	High	High	High	High	Phospho [S837(100)]	1	1.20177	0.977518	0.974364	0.919857	0.736881	1.08147	1.22169	1.21964	1	1	1	1	1	1	1	1	1	0.046	0	2.82006	1
FALSE	High	Master Protein	Q6H4L2	Elongation factor 2 OS=Oryza sativa subsp. japonica GN=Os02g0519900 PE=2 SV=1	0.00271592	3.36835	1.42349	1	1	1	1	843	93.961	6.16	High	High	High	High	High	High	High	High	High	Phospho [S298(100)]	1	1.17538	0.97561	1.12585	1.03547	0.956773	1.08337	1.03728	1.16897	1	1	1	1	1	1	1	1	1	0.11	0	6.27216	1
FALSE	High	Master Protein	Q0J485	Os08g0528900 protein OS=Oryza sativa subsp. japonica GN=Os08g0528900 PE=4 SV=1	0.00271592	3.36512	3.79009	1	2	1	1	343	38.116	7.69	High	High	High	High	High	High	High	High	High	Phospho [S351(98.8)]	1	1.14696	0.880243	0.967523	0.973138	0.847316	1.48868	1.17367	1.55622	1	1	1	1	1	1	1	1	1	0.086	0	8.16423	1
FALSE	High	Master Protein	Q0JBE1	OSJNBa0091D06.22 protein OS=Oryza sativa subsp. japonica GN=Os04g0538700 PE=2 SV=1	0.00271592	3.34698	3.07692	1	3	1	1	520	55.829	8.25	High	High	High	High	High	High	High	High	High	Phospho [S97(100)]	1	0.935835	1.02997	0.926477	0.901761	0.976319	1.39114	1.18615	1.43075	1	1	1	1	1	1	1	1	1	0.155	0	7.72202	1
FALSE	High	Master Protein	Q6YVY6	Ninja-family protein Os07g0602900 OS=Oryza sativa subsp. japonica GN=Os07g0602900 PE=2 SV=1	0.00271592	3.33894	3.76176	1	3	1	1	319	33.375	9.17	High	High	High	High	High	High	High	High	High	Phospho [S596(100)]	1	1.17538	0.953676	0.90009	1.15309	0.956773	1.09189	1.22361	0.971127	1	1	1	1	1	1	1	1	1	0.07	0	2.84726	1
FALSE	High	Master Protein	Q8LIY0	Probable xyloglucan glycosyltransferase 1 OS=Oryza sativa subsp. japonica GN=CSLC1 PE=3 SV=1	0.00271592	3.33885	1.73913	1	1	1	1	690	76.441	8.54	High	High	High	High	High	High	High	High	High	Phospho [S198(100)]	1	1.09215	1.14918	0.995865	0.953032	0.828747	0.944159	0.735702	0.934936	1	1	1	1	1	1	1	1	1	0.07	0	2.60652	1
FALSE	High	Master Protein	Q8S118	Katanin p60 ATPase-containing subunit A1 OS=Oryza sativa subsp. japonica GN=P0445E10.4-1 PE=2 SV=1	0.00271592	3.33866	2.31214	1	1	1	1	519	56.962	7.62	High	High	High	High	High	High	High	High	High	Phospho [S562(100)]	1	1.1906	1.08719	1.23433	1.00933	1.16982	1.48584	1.43587	1.79266	1	1	1	1	1	1	1	1	1	0.056	0	2.24849	1
FALSE	High	Master Protein	A0A0P0W2T4	Os03g0738900 protein OS=Oryza sativa subsp. japonica GN=Os03g0738900 PE=4 SV=1	0.00271592	3.33003	1.67683	1	1	1	1	656	71.759	6.16	High	High	High	High	High	High	High	High	High	Phospho [S317(99.2)]	1	1.16624	1.03378	1.09262	1.01134	1.10044	1.17996	1.16406	1.24135	1	1	1	1	1	1	1	1	1	0.08	0	2.70269	1
FALSE	High	Master Protein	Q5QLB6	Os01g0834100 protein OS=Oryza sativa subsp. japonica GN=Os01g0834100 PE=4 SV=1	0.00271592	3.32763	3.64146	1	2	1	1	357	38.896	5.38	High	High	High	High	High	High	High	High	High	Phospho [S123(100)]	1	0.947	0.872613	1.23628	1.16817	0.997819	1.68093	1.31293	1.67927	1	1	1	1	1	1	1	1	1	0.233	0	2.9279	1
FALSE	High	Master Protein	Q2QQS1	KE2 family protein, expressed OS=Oryza sativa subsp. japonica GN=LOC_Os12g30060 PE=2 SV=1	0.00271592	3.32203	8.84354	1	1	1	1	147	16.435	5.26	High	High	High	High	High	High	High	High	High	Phospho [S112(100)]	1	1.2038	0.885011	1.47865	0.91282	1.05548	1.04075	0.981576	1.03868	1	1	1	1	1	1	1	1	1	0.334	0	3.26098	1
FALSE	High	Master Protein	Q10LM8	Dormancy/auxin associated protein, expressed OS=Oryza sativa subsp. japonica GN=Os03g0342900 PE=2 SV=1	0.00271592	3.30821	6.01504	1	1	1	1	133	13.625	10.18	High	High	High	High	High	High	High	High	High	Phospho [S211(99.6)]	1	1.08403	0.971796	0.942114	1.00732	0.740791	1.08242	0.933554	1.10624	1	1	1	1	1	1	1	1	1	0.075	0	2.39665	1
FALSE	High	Master Protein	Q6YW01	Os07g0603200 protein OS=Oryza sativa subsp. japonica GN=Os07g0603200 PE=2 SV=1	0.00271592	3.30671	3.94973	1	1	1	1	557	61.692	6.27	High	High	High	High	High	High	High	High	High	Phospho [S137(100)]	1	1.06068	1.09959	1.16689	0.986207	1.02714	1.30686	1.30044	1.25945	2	2	2	2	2	2	2	2	2	0.778	0	4.92964	2
FALSE	High	Master Protein	P09229	Cysteine proteinase inhibitor 1 OS=Oryza sativa subsp. japonica GN=Os01g0803200 PE=1 SV=2	0.00271592	3.29665	15.7143	2	2	2	1	140	15.346	5.85	High	High	High	High	High	High	High	High	High	Phospho [S388(100)]	1	0.941925	0.922204	0.976319	0.972133	0.864907	1.87127	1.9305	2.12804	1	1	1	1	1	1	1	1	1	0.093	0	6.80588	1
FALSE	High	Master Protein	Q5JMT5	CBS domain-containing protein-like OS=Oryza sativa subsp. japonica GN=Os01g0961200 PE=4 SV=1	0.00271592	3.29516	1.87617	1	3	1	1	533	57.649	6.86	High	High	High	High	High	High	High	High	High	Phospho [S152(100)]	1	1.01095	1.07765	1.22651	1.1752	1.05255	1.22447	1.20248	1.3451	1	1	1	1	1	1	1	1	1	0.259	0	5.8824	1
FALSE	High	Master Protein	Q7XIK5	Os04g0613600 protein OS=Oryza sativa subsp. japonica GN=OJ1773_H01.103 PE=2 SV=1	0.00271592	3.27671	8.07453	1	2	1	1	161	17.825	10.58	High	High	High	High	High	High	High	High	High	Phospho [S372(100)]	1	1.17132	0.798227	0.952864	0.814299	0.81311	1.01518	0.944119	1.16656	1	1	1	1	1	1	1	1	1	0.083	0	11.9383	1
FALSE	High	Master Protein	Q5JMX9	Os01g0752200 protein OS=Oryza sativa subsp. japonica GN=Os01g0752200 PE=2 SV=1	0.00271592	3.27181	2.82776	1	5	1	1	389	43.269	5.24	High	High	High	High	High	High	High	High	High	Phospho [S198(98.9)]	1	1.0617	0.976564	1.03691	0.873613	0.960682	1.2936	1.2044	1.43317	1	1	1	1	1	1	1	1	1	0.334	0	8.7354	1
FALSE	High	Master Protein	Q2QM93	CCAAT-box transcription factor complex WHAP5, putative, expressed OS=Oryza sativa subsp. japonica GN=NF-Y22 PE=2 SV=2	0.00271592	3.26512	5.52995	1	9	1	1	217	23.707	9.13	High	High	High	High	High	High	High	High	High	Phospho [S557(100)]	1	0.832304	0.987054	0.991956	1.13399	1.13855	1.51236	1.29468	1.72631	1	1	1	1	1	1	1	1	1	0.075	0	3.04801	1
FALSE	High	Master Protein	Q6Z441	Homeodomain protein OS=Oryza sativa subsp. japonica GN=Os02g0147800 PE=2 SV=1	0.00271592	3.25555	2.93686	1	1	1	1	681	76.104	7.42	High	High	High	High	High	High	High	High	High	Phospho [S690(100)]	1	1.02313	0.998498	1.06428	0.862554	0.786723	1.30875	1.22937	1.3065	1	1	1	1	1	1	1	1	1	0.044	0	5.82334	1
FALSE	High	Master Protein	Q84Z87	Os08g0518100 protein OS=Oryza sativa subsp. japonica GN=P0700D12.119 PE=2 SV=1	0.00271592	3.25477	1.91847	1	2	1	1	834	92.499	5.39	High	High	High	High	High	High	High	High	High	Phospho [S170(100)]	1	0.707459	1.04904	1.033	1.0988	0.788678	1.21879	1.1266	1.23412	1	1	1	1	1	1	1	1	1	0.468	0	1.85011	1
FALSE	High	Master Protein	Q6YZI7	Os08g0558700 protein OS=Oryza sativa subsp. japonica GN=Os08g0558700 PE=2 SV=1	0.00271592	3.23941	3.4188	1	4	1	1	234	27.452	9.36	High	High	High	High	High	High	High	High	High	Phospho [S504(100)]	1	0.99166	0.990869	1.03789	0.817315	0.882498	1.12125	1.14293	1.42231	1	1	1	1	1	1	1	1	1	0.075	0	4.91473	1
FALSE	High	Master Protein	Q5VRK0	Os06g0127200 protein OS=Oryza sativa subsp. japonica GN=Os06g0127200 PE=4 SV=1	0.00271592	3.22352	1.97487	1	2	1	1	557	61.83	4.78	High	High	High	High	High	High	High	High	High	Phospho [T118(100)]	1	0.850574	0.843049	0.926477	1.06362	0.67238	1.22068	1.19383	0.802236	1	1	1	1	1	1	1	1	1	0.096	0	3.1938	1
FALSE	High	Master Protein	Q7XQI1	OSJNBa0067K08.9 protein OS=Oryza sativa subsp. japonica GN=Os04g0496400 PE=4 SV=2	0.003245	3.20204	7.98319	1	1	1	1	476	53.544	4.82	High	High	High	High	High	High	High	High	High	Phospho [T467(99.7)]	1	1.12463	1.17588	1.09457	0.957053	0.745677	1.30497	1.16118	1.32218	1	1	1	1	1	1	1	1	1	0.062	0	2.83582	1
FALSE	High	Master Protein	Q0DL03	Os05g0132100 protein OS=Oryza sativa subsp. japonica GN=Os05g0132100 PE=4 SV=1	0.003245	3.18742	2.54111	1	2	1	1	669	74.867	7.56	High	High	High	High	High	High	High	High	High	Phospho [S16(100); S17(100); S69(100)]	1	1.09621	1.00327	1.13855	1.01637	1.01541	0.875028	0.83943	0.857729	2	2	2	2	2	2	2	2	2	0.155	0	11.0783	2
FALSE	High	Master Protein	Q6K1X9	Os02g0608500 protein OS=Oryza sativa subsp. japonica GN=Os02g0608500 PE=2 SV=1	0.003245	3.18231	3.38645	2	5	2	1	502	55.556	8.69	High	High	High	High	High	High	High	High	High	Phospho [S116(99.6)]	1	0.719639	0.678063	0.736881	0.664508	0.690948	0.897756	0.757792	0.858935	1	1	1	1	1	1	1	1	1	0.08	0	8.57983	1
FALSE	High	Master Protein	Q69UF2	Os06g0594100 protein OS=Oryza sativa subsp. japonica GN=P0652A05.9-1 PE=2 SV=1	0.003245	3.18118	2.30415	1	9	1	1	434	46.854	6.93	High	High	High	High	High	High	High	High	High	Phospho [S48(100); S52(100)]	1	0.95106	0.904085	0.978273	0.826363	0.924522	0.953629	0.94796	1.08815	1	1	1	1	1	1	1	1	1	0.194	0	3.68083	1
FALSE	High	Master Protein	Q6H6D4	Os02g0168600 protein OS=Oryza sativa subsp. japonica GN=Os02g0168600 PE=4 SV=1	0.003245	3.176	5.80357	1	1	1	1	224	25.657	8.16	High	High	High	High	High	High	High	High	High	Phospho [S304(100); S306(100); S315(100)]	1	0.849559	0.811578	1.09262	0.666519	0.855134	1.10799	1.18423	1.19431	1	1	1	1	1	1	1	1	1	0.089	0	3.48778	1
FALSE	High	Master Protein	Q2RAL9	Expressed protein OS=Oryza sativa subsp. japonica GN=Os11g0146700 PE=2 SV=2	0.00375335	3.15833	3.52734	1	1	1	1	567	64.516	6.28	High	High	High	High	High	High	High	High	High	Phospho [S148(100)]	1	1.0008	1.05286	1.17764	0.938958	1.00466	1.15629	1.09011	0.944587	1	1	1	1	1	1	1	1	1	0.122	0	2.75278	1
FALSE	High	Master Protein	A0A0P0XAR8	Os07g0685400 protein (Fragment) OS=Oryza sativa subsp. japonica GN=Os07g0685400 PE=4 SV=1	0.00375335	3.15689	1.5625	1	1	1	1	640	62.457	9.07	High	High	High	High	High	High	High	High	High	Phospho [S436(98.5)]	1	1.05561	0.783921	1.00173	1.06362	0.943091	1.06632	1.13621	1.22205	1	1	1	1	1	1	1	1	1	0.08	0	2.98234	1
FALSE	High	Master Protein	Q654A0	Os06g0663200 protein OS=Oryza sativa subsp. japonica GN=Os06g0663200 PE=3 SV=1	0.00375335	3.13259	4.90405	1	2	1	1	469	51.714	6.79	High	High	High	High	High	High	High	High	High	Phospho [S126(100)]	1	1.23019	1.07956	1.17471	0.980175	1.00075	1.56444	1.33022	1.48866	1	1	1	1	1	1	1	1	1	0.334	0	2.38717	1
FALSE	High	Master Protein	Q6YUV4	Os02g0189000 protein OS=Oryza sativa subsp. japonica GN=Os02g0189000 PE=2 SV=1	0.00375335	3.12936	8.21918	1	1	1	1	146	16.725	10.39	High	High	High	High	High	High	High	High	High	Phospho [S71(100)]	1	1.05358	0.911714	0.922568	0.823347	0.850248	0.961205	0.988299	1.16535	2	2	2	2	2	2	2	2	2	0.259	0	6.21145	2
FALSE	High	Master Protein	Q84YS0	Os07g0456400 protein OS=Oryza sativa subsp. japonica GN=Os07g0456400 PE=2 SV=1	0.00375335	3.12889	2.87356	2	5	2	1	348	40.666	8.53	High	High	High	High	High	High	High	High	High	Phospho [T188(99.4)]	1	1.12869	0.761987	0.822883	0.918851	0.929409	1.17617	1.03248	1.36561	1	1	1	1	1	1	1	1	1	0.08	0	9.37891	1
FALSE	High	Master Protein	Q94GF2	Os03g0826600 protein OS=Oryza sativa subsp. japonica GN=OJ1111_B11.8 PE=2 SV=1	0.00375335	3.12511	2.38532	1	5	1	1	545	60.92	7.39	High	High	High	High	High	High	High	High	High	Phospho [S489(100); S492(100); S590(100)]	1	1.0688	0.955583	0.967523	0.76705	0.716358	0.836201	0.799091	0.833601	2	2	2	2	2	2	2	2	2	0.259	0	4.39593	2
FALSE	High	Master Protein	Q651Z0	Os09g0476100 protein OS=Oryza sativa subsp. japonica GN=Os09g0476100 PE=2 SV=1	0.00375335	3.11017	2.64901	2	2	2	1	604	64.223	6.79	High	High	High	High	High	High	High	High	High	Phospho [S232(100)]	1	0.988615	0.765802	0.880544	1.01235	0.821906	0.919537	0.92587	0.890301	1	1	1	1	1	1	1	1	1	0.145	0	2.51137	1
FALSE	High	Master Protein	Q6YZ10	27k vesicle-associated membrane protein-associated protein-like OS=Oryza sativa subsp. japonica GN=Os08g0141300 PE=2 SV=1	0.00375335	3.10757	3.86266	1	1	1	1	233	25.622	9.54	High	High	High	High	High	High	High	High	High	Phospho [S41(99)]	1	1.2038	0.980379	1.41024	0.989223	1.09262	1.66767	1.57993	1.69374	1	1	1	1	1	1	1	1	1	0.07	0	2.47498	1
FALSE	High	Master Protein	Q6K2L9	Os02g0480900 protein OS=Oryza sativa subsp. japonica GN=P0519B12.23-1 PE=2 SV=1	0.00424403	3.09539	2.36887	1	1	1	1	591	64.339	6.21	High	High	High	High	High	High	High	High	High	Phospho [S81(100); S83(100)]	1	1.15711	0.949861	1.06818	1.00129	1.02225	1.22163	1.14773	1.2691	1	1	1	1	1	1	1	1	1	0.166	0	8.1708	1
FALSE	High	Master Protein	Q75GR5	KH domain-containing protein SPIN1 OS=Oryza sativa subsp. japonica GN=SPIN1 PE=1 SV=1	0.00424403	3.07268	4.62633	1	3	1	1	281	31.266	9.45	High	High	High	High	High	High	High	High	High	Phospho [S235(100)]	1	1.13985	0.924112	0.965569	0.813294	0.888362	0.732978	0.779882	0.7576	1	1	1	1	1	1	1	1	1	0.089	0	12.5057	1
FALSE	High	Master Protein	Q53PP2	CAA303718.1 protein OS=Oryza sativa subsp. japonica GN=Os11g0163800 PE=2 SV=1	0.00424403	3.06606	1.90931	1	6	1	1	419	44.644	8.24	High	High	High	High	High	High	High	High	High	Phospho [S299(100)]	1	1.05459	1.07765	1.13269	0.827368	0.879567	1.19606	1.13621	0.966302	1	1	1	1	1	1	1	1	1	0.105	0	2.93168	1
FALSE	High	Master Protein	Q0JHZ2	Zinc finger CCCH domain-containing protein 11 OS=Oryza sativa subsp. japonica GN=Os01g0834700 PE=2 SV=2	0.00424403	3.06268	3.55191	1	1	1	1	366	41.62	5.31	High	High	High	High	High	High	High	High	High	Phospho [S182(100)]	1	1.05764	0.952722	0.841452	0.909804	0.959705	1.06727	1.05745	1.21481	1	1	1	1	1	1	1	1	1	0.233	0	7.81023	1
FALSE	High	Master Protein	Q6F391	Expressed protein OS=Oryza sativa subsp. japonica GN=OSJNBb0021G19.8 PE=2 SV=1	0.00424403	3.05557	5.78947	1	3	1	1	190	21.027	5.66	High	High	High	High	High	High	High	High	High	Phospho [S157(100); S160(100); S161(100)]	1	1.1632	1.12343	1.26658	1.29383	1.15125	1.48395	1.18999	1.62136	1	1	1	1	1	1	1	1	1	0.033	0	2.55371	1
FALSE	High	Master Protein	A0A0P0XWY0	Os10g0532100 protein (Fragment) OS=Oryza sativa subsp. japonica GN=Os10g0532100 PE=4 SV=1	0.00424403	3.05208	1.40728	1	1	1	1	1208	131.033	5.45	High	High	High	High	High	High	High	High	High	Phospho [S136(100)]	1	0.996735	0.901224	1.0203	0.956048	0.883476	1.08526	1.06802	1.1183	1	1	1	1	1	1	1	1	1	0.389	0	2.6365	1
FALSE	High	Master Protein	P0C2Z3	ATP synthase epsilon chain, chloroplastic OS=Oryza sativa subsp. japonica GN=atpE PE=3 SV=1	0.00424403	3.04024	8.0292	1	1	1	1	137	15.208	5.1	High	High	High	High	High	High	High	High	High	Phospho [S611(100); S612(100)]	1	0.731819	0.70572	0.704631	0.601174	0.677266	0.683734	0.791408	0.875824	1	1	1	1	1	1	1	1	1	0.062	0	2.85604	1
FALSE	High	Master Protein	Q0J952	Zinc finger CCCH domain-containing protein 32 OS=Oryza sativa subsp. japonica GN=Os04g0671800 PE=2 SV=1	0.00424403	3.03259	1.68776	1	1	1	1	711	80.111	5.55	High	High	High	High	High	High	High	High	High	Phospho [S262(100)]	1	0.831289	0.891687	0.70854	0.891708	0.800406	0.914802	0.747227	0.860141	1	1	1	1	1	1	1	1	1	0.155	0	2.97286	1
FALSE	High	Master Protein	B7EN35	Os06g0298200 protein OS=Oryza sativa subsp. japonica GN=Os06g0298200 PE=2 SV=1	0.00424403	3.018	2.94118	1	1	1	1	408	43.908	5.27	High	High	High	High	High	High	High	High	High	Phospho [S16(99.5)]	1	1.08301	0.843049	1.00564	0.960069	0.806269	0.80495	0.771238	0.692456	1	1	1	1	1	1	1	1	1	0.179	0	8.35468	1
FALSE	High	Master Protein	C7IWB6	Os01g0923300 protein OS=Oryza sativa subsp. japonica GN=Os01g0923300 PE=4 SV=1	0.00424403	3.01426	3.78151	1	3	1	1	238	25.706	9.88	High	High	High	High	High	High	High	High	High	Phospho [T282(100)]	1	0.768359	1.22166	0.728086	0.830384	1.03691	1.28034	1.28027	1.52364	2	2	2	2	2	2	2	2	2	0.083	0	15.2515	1
FALSE	High	Master Protein	B2ZX90	Chromatin assembly factor 1 subunit FSM OS=Oryza sativa subsp. japonica GN=FSM PE=2 SV=1	0.00424403	2.98713	0.957447	1	7	1	1	940	105.4	5.59	High	High	High	High	High	High	High	High	High	Phospho [S175(100); S176(100)]	1	1.0688	1.15109	1.4249	0.997265	1.08969	1.10326	0.937396	0.991636	1	1	1	1	1	1	1	1	1	0.064	0	7.89919	1
FALSE	High	Master Protein	Q8RYZ1	Cytosolic factor-like protein OS=Oryza sativa subsp. japonica GN=P0648C09.9 PE=2 SV=1	0.00476695	2.97428	2.28385	1	3	1	1	613	66.417	4.67	High	High	High	High	High	High	High	High	High	Phospho [S915(100); S917(100)]	1	1.07083	0.967027	1.14441	1.21341	1.08871	1.10041	1.18807	1.16053	1	1	1	1	1	1	1	1	1	0.122	0	7.29218	1
FALSE	High	Master Protein	A0A0P0WFW3	Os04g0661700 protein OS=Oryza sativa subsp. japonica GN=Os04g0661700 PE=4 SV=1	0.00476695	2.97263	0.949367	1	4	1	1	948	103.463	7.24	High	High	High	High	High	High	High	High	High	Phospho [S491(99.7)]	1	0.917565	1.04904	0.995865	0.978165	0.871748	1.04549	1.11604	1.01094	1	1	1	1	1	1	1	1	1	0.05	0	2.50912	1
FALSE	High	Master Protein	Q0JKH6	Os01g0674100 protein OS=Oryza sativa subsp. japonica GN=Os01g0674100 PE=3 SV=1	0.00512033	2.94615	1.49813	1	1	1	1	801	88.744	6.46	High	High	High	High	High	High	High	High	High	Phospho [S193(99.4)]	1	0.87392	0.826837	0.995865	0.792183	0.943091	1.5616	1.09107	1.24859	1	1	1	1	1	1	1	1	1	0.145	0	2.65333	1
FALSE	High	Master Protein	A0A0P0X6N4	Os07g0497000 protein (Fragment) OS=Oryza sativa subsp. japonica GN=Os07g0497000 PE=4 SV=1	0.00512033	2.93479	4.28571	1	2	1	1	350	36.941	5.01	High	High	High	High	High	High	High	High	High	Phospho [S418(100)]	1	0.958165	0.953676	0.873703	0.854512	0.773041	0.881657	0.73186	0.863761	1	1	1	1	1	1	1	1	1	0.096	0	4.93939	1
FALSE	High	Master Protein	Q0D724	Os07g0408100 protein OS=Oryza sativa subsp. japonica GN=Os07g0408100 PE=2 SV=1	0.00512033	2.92518	2.36967	1	2	1	1	422	45.822	6.4	High	High	High	High	High	High	High	High	High	Phospho [S405(100)]	1	1.00892	0.867845	0.914749	0.856522	0.754473	0.91859	0.983497	0.998874	1	1	1	1	1	1	1	1	1	0.083	0	4.57367	1
FALSE	High	Master Protein	Q2QN68	Os12g0577100 protein OS=Oryza sativa subsp. japonica GN=LOC_Os12g38800 PE=4 SV=1	0.00512033	2.92191	3.86473	1	2	1	1	414	47.352	9.07	High	High	High	High	High	High	High	High	High	Phospho [S229(100); S243(98.9)]	1	1.49409	1.06812	1.10825	0.916841	0.941136	1.43849	1.11604	1.42472	1	1	1	1	1	1	1	1	1	0.136	0	2.8099	1
FALSE	High	Master Protein	Q10D38	Magnesium transporter MRS2-I OS=Oryza sativa subsp. japonica GN=MRS2-I PE=2 SV=1	0.00512033	2.91328	6.77083	1	1	1	1	384	42.163	5.05	High	High	High	High	High	High	High	High	High	Phospho [S203(99)]	1	1.09113	0.789644	1.06525	0.813294	0.844384	1.18849	0.972932	1.14243	1	1	1	1	1	1	1	1	1	0.292	0	2.80131	1
FALSE	High	Master Protein	Q6YYB0	Uncharacterized protein Os08g0359500 OS=Oryza sativa subsp. japonica GN=Os08g0359500 PE=2 SV=1	0.00512033	2.91222	6.10329	1	1	1	1	213	22.779	4.49	High	High	High	High	High	High	High	High	High	Phospho [S73(99)]	1	1.1703	0.980379	1.26462	1.17822	1.23237	1.72733	1.39265	2.32829	1	1	1	1	1	1	1	1	1	0.077	0	2.69869	1
FALSE	High	Master Protein	Q7EYM6	Os07g0466200 protein OS=Oryza sativa subsp. japonica GN=P0404G11.125-1 PE=4 SV=1	0.00512033	2.88174	3.06122	1	2	1	1	490	54.947	6.11	High	High	High	High	High	High	High	High	High	Phospho [S566(100)]	1	1.15203	0.768663	1.12194	1.00129	1.00564	0.897756	0.917226	0.829982	1	1	1	1	1	1	1	1	1	0.068	0	19.2331	1
FALSE	High	Master Protein	Q6Z4K6	DEAD-box ATP-dependent RNA helicase 52B OS=Oryza sativa subsp. japonica GN=PL10B PE=2 SV=1	0.00512033	2.88107	1.41066	1	7	1	1	638	67.13	8.22	High	High	High	High	High	High	High	High	High	Phospho [S192(100); S196(99)]	1	1.01704	0.925065	0.908885	0.83139	0.84927	1.14398	1.22553	1.23774	1	1	1	1	1	1	1	1	1	0.166	0	2.81357	1
FALSE	High	Master Protein	Q7XI96	Protein BZR1 homolog 1 OS=Oryza sativa subsp. japonica GN=BZR1 PE=1 SV=1	0.00512033	2.86107	4.69799	1	1	1	1	298	31.889	8.47	High	High	High	High	High	High	High	High	High	Phospho [S129(99.2)]	1	1.15711	1.01853	1.21087	1.07065	1.00955	1.1525	1.13333	1.06764	1	1	1	1	1	1	1	1	1	0.116	0	6.95923	1
FALSE	High	Master Protein	Q0DUA7	Os03g0196900 protein (Fragment) OS=Oryza sativa subsp. japonica GN=Os03g0196900 PE=4 SV=1	0.00512033	2.8514	3.72881	1	4	1	1	295	32.625	7.72	High	High	High	High	High	High	High	High	High	Phospho [S162(100)]	1	0.91249	0.879289	1.14832	0.995255	1.05353	0.940371	1.02672	0.963889	1	1	1	1	1	1	1	1	1	0.089	0	11.0399	1
FALSE	High	Master Protein	Q8RZQ6	Os01g0881500 protein OS=Oryza sativa subsp. japonica GN=Os01g0881500 PE=2 SV=1	0.00512033	2.85047	1.62749	1	4	1	1	553	61.759	4.94	High	High	High	High	High	High	High	High	High	Phospho [S496(98.8); S500(100)]	1	1.19568	0.939371	1.32815	1.09076	1.11314	1.0095	1.3014	1.56466	1	1	1	1	1	1	1	1	1	0.077	0	2.82668	1
FALSE	High	Master Protein	Q9SNK5	MLO-like protein OS=Oryza sativa subsp. japonica GN=Os03g0129100 PE=2 SV=1	0.00512033	2.84134	3.24324	1	1	1	1	555	62.645	9.58	High	High	High	High	High	High	High	High	High	Phospho [S424(100)]	1	1.17233	0.896455	0.894226	1.06161	0.801383	0.983933	1.04497	1.04472	1	1	1	1	1	1	1	1	1	0.093	0	2.46152	1
FALSE	High	Master Protein	Q2QXG8	Os12g0157200 protein OS=Oryza sativa subsp. japonica GN=Os12g0157200 PE=4 SV=1	0.00512033	2.81901	2.11765	1	1	1	1	425	47.133	5.73	High	High	High	High	High	High	High	High	High	Phospho [S226(100)]	1	1.02719	1.43337	1.31642	1.44463	1.51579	1.86559	1.41474	2.27521	1	1	1	1	1	1	1	1	1	0.061	0	3.36904	1
FALSE	High	Master Protein	A0A0P0XWQ9	Os10g0510700 protein OS=Oryza sativa subsp. japonica GN=Os10g0510700 PE=3 SV=1	0.00512033	2.80189	4.79452	1	1	1	1	730	80.165	9.31	High	High	High	High	High	High	High	High	High	Phospho [S585(100)]	1	1.08504	0.984193	1.07893	0.883666	1.10825	1.47069	1.32157	1.4018	1	1	1	1	1	1	1	1	1	0.054	0	2.49856	1
FALSE	High	Master Protein	Q0D519	Formin-like protein 13 OS=Oryza sativa subsp. japonica GN=FH13 PE=2 SV=1	0.00512033	2.79048	2.32558	1	1	1	1	774	83.758	8.47	High	High	High	High	High	High	High	High	High	Phospho [S355(100)]	1	0.89828	0.767709	0.946023	0.812289	0.662607	0.915749	1.00751	1.16415	1	1	1	1	1	1	1	1	1	0.096	0	7.58309	1
FALSE	High	Master Protein	Q60E59	Ribosomal protein OS=Oryza sativa subsp. japonica GN=Os05g0388500 PE=2 SV=1	0.00512033	2.78701	3.06407	1	8	1	1	359	38.756	7.33	High	High	High	High	High	High	High	High	High	Phospho [S93(100)]	1	1.12564	0.941278	0.784769	0.61927	0.670425	0.678052	0.746267	0.616455	1	1	1	1	1	1	1	1	1	0.389	0	2.93621	1
FALSE	High	Master Protein	B7FA27	Os05g0494700 protein OS=Oryza sativa subsp. japonica GN=Os05g0494700 PE=2 SV=1	0.00512033	2.78015	5.98802	1	1	1	1	167	16.935	4.22	High	High	High	High	High	High	High	High	High	Phospho [S120(100)]	1	1.17132	1.0252	1.2998	1.04653	1.12096	1.23394	1.16214	1.21723	1	1	1	1	1	1	1	1	1	0.259	0	2.34327	1
FALSE	High	Master Protein	Q7XXS2	17.7 kDa low temperature induced protein OS=Oryza sativa subsp. japonica GN=Os03g0353400 PE=2 SV=1	0.00512033	2.77006	5	1	1	1	1	160	17.691	4.89	High	High	High	High	High	High	High	High	High	Phospho [S306(99.3); S310(100)]	1	1.49409	1.13487	1.07796	0.788161	0.779882	0.614603	0.546494	0.665916	1	1	1	1	1	1	1	1	1	0.166	0	6.39793	1
FALSE	High	Master Protein	Q7F0H8	Os07g0690400 protein OS=Oryza sativa subsp. japonica GN=P0597G07.122 PE=2 SV=1	0.00512033	2.76565	2.08817	1	6	1	1	431	46.257	7.9	High	High	High	High	High	High	High	High	High	Phospho [S224(100)]	1	1.02617	1.00804	1.09946	0.965096	1.04766	1.17617	1.09491	1.35475	1	1	1	1	1	1	1	1	1	0.194	0	2.67326	1
FALSE	High	Master Protein	Q6ET43	Os02g0158400 protein OS=Oryza sativa subsp. japonica GN=Os02g0158400 PE=2 SV=1	0.00512033	2.76346	5.26316	1	1	1	1	228	25.182	9.67	High	High	High	High	High	High	High	High	High	Phospho [S243(100); S246(100)]	1	1.25556	1.14918	1.13171	1.02843	1.10044	1.25762	1.14293	1.14002	1	1	1	1	1	1	1	1	1	0.056	0	5.43378	1
FALSE	High	Master Protein	Q84YJ6	DNA-binding protein family-like OS=Oryza sativa subsp. japonica GN=OSJNBa0016N23.124-1 PE=2 SV=1	0.00512033	2.74739	1.81818	1	2	1	1	660	68.627	8.85	High	High	High	High	High	High	High	High	High	Phospho [S250(100)]	1	1.20075	0.864984	0.970455	0.773082	0.823861	0.781275	0.918187	0.849284	1	1	1	1	1	1	1	1	1	0.083	0	5.80657	1
FALSE	High	Master Protein	Q9LI00	6-phosphogluconate dehydrogenase, decarboxylating 1 OS=Oryza sativa subsp. japonica GN=G6PGH1 PE=2 SV=1	0.00512033	2.74594	2.29167	1	2	1	1	480	52.688	6.18	High	High	High	High	High	High	High	High	High	Phospho [S1046(100); S1068(100)]	1	1.15609	0.942232	1.22651	1.02642	1.11119	1.33622	1.30909	1.35355	1	1	1	1	1	1	1	1	1	0.036	0	3.32908	1
FALSE	High	Master Protein	Q8H9E4	Os07g0476200 protein OS=Oryza sativa subsp. japonica GN=Os07g0476200 PE=2 SV=1	0.00512033	2.74256	2.43218	1	1	1	1	1069	122.234	6.07	High	High	High	High	High	High	High	High	High	Phospho [S356(100)]	1	1.01805	0.97561	1.05939	1.01938	0.946023	1.11557	1.01807	1.07488	1	1	1	1	1	1	1	1	1	0.11	0	26.6291	1
FALSE	High	Master Protein	Q2QWT4	3'(2'),5'-bisphosphate nucleotidase OS=Oryza sativa subsp. japonica GN=Os12g0183300 PE=2 SV=1	0.00512033	2.73212	2.51397	1	10	1	1	358	37.457	4.74	High	High	High	High	High	High	High	High	High	Phospho [S114(100)]	1	1.23019	1.30654	1.40926	1.09679	1.18937	1.36841	1.10932	1.14605	1	1	1	1	1	1	1	1	1	0.585	0	4.41061	1
FALSE	High	Master Protein	Q69RN2	Chitinase III-like protein OS=Oryza sativa subsp. japonica GN=Os07g0500300 PE=2 SV=1	0.00512033	2.72827	4.04624	1	2	1	1	173	18.905	7.06	High	High	High	High	High	High	High	High	High	Phospho [S598(100)]	1	0.988615	0.966074	1.02714	0.978165	0.92159	1.05875	1.02576	1.09538	1	1	1	1	1	1	1	1	1	0.061	0	8.39912	1
FALSE	High	Master Protein	Q10KX6	Os03g0367000 protein OS=Oryza sativa subsp. japonica GN=Os03g0367000 PE=2 SV=1	0.00512033	2.72793	2.68987	1	4	1	1	632	70.374	5.54	High	High	High	High	High	High	High	High	High	Phospho [S305(100)]	1	1.03023	0.887872	0.859043	0.963085	0.77695	0.863664	0.982537	1.03506	1	1	1	1	1	1	1	1	1	0.041	0	5.00133	1
FALSE	High	Master Protein	Q5VS68	Os06g0105900 protein OS=Oryza sativa subsp. japonica GN=Os06g0105900 PE=4 SV=1	0.00512033	2.72262	1.27701	1	3	1	1	1018	110.698	6.05	High	High	High	High	High	High	High	High	High	Phospho [T346(99.4)]	1	1.02922	1.01757	0.896181	0.740912	0.796496	0.876922	1.03344	1.13037	1	1	1	1	1	1	1	1	1	0.093	0	5.46304	1
FALSE	High	Master Protein	Q10QA8	Os03g0203000 protein OS=Oryza sativa subsp. japonica GN=Os03g0203000 PE=2 SV=1	0.00562085	2.70642	3.85675	1	2	1	1	363	42.271	9.63	High	High	High	High	High	High	High	High	High	Phospho [S407(100); S410(100)]	1	0.905385	1.00994	1.1063	0.920862	0.996842	1.15061	1.0757	1.14967	1	1	1	1	1	1	1	1	1	0.045	0	26.313	1
FALSE	High	Master Protein	Q7XCN0	Expressed protein OS=Oryza sativa subsp. japonica GN=OSJNBb0064P21.6 PE=2 SV=1	0.00562085	2.69272	0.841346	1	13	1	1	832	87.54	8.76	High	High	High	High	High	High	High	High	High	Phospho [S459(100)]	1	1.01501	0.988962	0.816042	0.862554	0.870771	0.822943	0.812538	0.926492	1	1	1	1	1	1	1	1	1	0.08	0	2.21372	1
FALSE	High	Master Protein	Q5N8F6	BHLH protein-like OS=Oryza sativa subsp. japonica GN=Os01g0705700 PE=4 SV=1	0.00602107	2.67778	1.95652	1	1	1	1	460	49.235	7.71	High	High	High	High	High	High	High	High	High	Phospho [S730(97.6); T734(98.8)]	1	0.982525	0.934602	0.975342	0.741917	0.709517	0.932795	0.931633	1.21843	1	1	1	1	1	1	1	1	1	0.028	0	2.55848	1
FALSE	High	Master Protein	Q5W6G8	Os05g0350700 protein OS=Oryza sativa subsp. japonica GN=Os05g0350700 PE=2 SV=1	0.00602107	2.6749	1.35891	1	3	1	1	1251	136.026	8.27	High	High	High	High	High	High	High	High	High	Phospho [S114(100)]	1	1.14188	0.740052	0.903999	0.978165	0.715381	1.32485	1.34751	1.53209	1	1	1	1	1	1	1	1	1	1.154	0	6.80393	1
FALSE	High	Master Protein	Q6ZJR4	Os08g0155201 protein OS=Oryza sativa subsp. japonica GN=Os08g0155201 PE=4 SV=1	0.00602107	2.66837	11.4754	1	3	1	1	122	11.793	5.29	High	High	High	High	High	High	High	High	High	Phospho [S199(100); S203(100)]	1	1.17944	1.13964	1.06525	1.03547	1.0115	1.11557	0.992141	1.08815	1	1	1	1	1	1	1	1	1	0.038	0	2.82386	1
FALSE	High	Master Protein	Q69P51	Cellulose synthase A catalytic subunit 9 [UDP-forming] OS=Oryza sativa subsp. japonica GN=CESA9 PE=2 SV=1	0.00602107	2.62361	1.23223	1	1	1	1	1055	118.621	6.86	High	High	High	High	High	High	High	High	High	Phospho [T807(99.6)]	1	1.16726	1.12724	1.23335	1.0797	1.03691	1.48016	1.23513	1.58155	1	1	1	1	1	1	1	1	1	0.058	0	4.65291	1
FALSE	High	Master Protein	A0A0P0W3C8	Os03g0724300 protein OS=Oryza sativa subsp. japonica GN=Os03g0724300 PE=4 SV=1	0.00602107	2.62361	1.73053	1	7	1	1	809	85.959	7.68	High	High	High	High	High	High	High	High	High	Phospho [S97(100)]	1	1.03328	0.959398	1.05743	0.972133	0.953841	1.27561	1.27163	1.42955	1	1	1	1	1	1	1	1	1	0.046	0	11.1238	1
FALSE	High	Master Protein	Q0JPH5	Os01g0222700 protein OS=Oryza sativa subsp. japonica GN=Os01g0222700 PE=2 SV=1	0.00602107	2.62251	1.5896	1	6	1	1	692	78.542	7.3	High	High	High	High	High	High	High	High	High	Phospho [S191(100)]	1	1.19466	0.90027	1.18839	1.0043	1.01346	0.966887	1.09011	1.00491	1	1	1	1	1	1	1	1	1	0.072	0	5.13912	1
FALSE	High	Master Protein	Q8S7M7	Plant intracellular Ras-group-related LRR protein 5 OS=Oryza sativa subsp. japonica GN=IRL5 PE=2 SV=1	0.00602107	2.58236	1.84162	1	2	1	1	543	59.168	5.22	High	High	High	High	High	High	High	High	High	Phospho [S134(100); S137(100)]	1	0.99166	0.812532	0.858066	0.759007	0.858066	0.750024	0.931633	1.02059	1	1	1	1	1	1	1	1	1	0.042	0	2.57803	1
FALSE	High	Master Protein	A0A0P0VFD5	Os02g0167500 protein (Fragment) OS=Oryza sativa subsp. japonica GN=Os02g0167500 PE=4 SV=1	0.00602107	2.57955	1.35841	1	1	1	1	957	105.702	7.85	High	High	High	High	High	High	High	High	High	Phospho [S239(100)]	1	0.88407	1.00327	1.033	0.783135	0.873703	1.14682	1.11124	1.11951	1	1	1	1	1	1	1	1	1	0.136	0	3.94514	1
FALSE	High	Master Protein	Q6Z6E3	Os02g0204000 protein OS=Oryza sativa subsp. japonica GN=Os02g0204000 PE=4 SV=1	0.00602107	2.54197	5.78512	1	5	1	1	242	25.321	10.26	High	High	High	High	High	High	High	High	High	Phospho [S413(99.6); S416(100)]	1	1.01298	1.04141	0.860021	0.950016	0.823861	0.784116	0.834628	0.877031	1	1	1	1	1	1	1	1	1	0.047	0	4.96011	1
FALSE	High	Master Protein	Q69QX2	Os08g0296900 protein OS=Oryza sativa subsp. japonica GN=P0024C06.105-1 PE=2 SV=1	0.00602107	2.53313	1.16279	1	3	1	1	774	87.453	6.28	High	High	High	High	High	High	High	High	High	Phospho [S129(100)]	1	1.08098	1.11008	1.11607	0.997265	1.00759	0.989615	0.988299	0.978366	1	1	1	1	1	1	1	1	1	0.155	0	5.36039	1
FALSE	High	Master Protein	A0A0N7KPE4	Os08g0192400 protein OS=Oryza sativa subsp. japonica GN=Os08g0192400 PE=4 SV=1	0.00602107	2.49689	2.49307	1	2	1	1	361	41.367	5.17	High	High	High	High	High	High	High	High	High	Phospho [S453(99.6)]	1	0.9673	0.863077	0.934295	0.847475	0.769132	1.12125	1.03824	1.15932	1	1	1	1	1	1	1	1	1	0.058	0	4.62703	1
FALSE	High	Master Protein	Q10NJ0	Os03g0268200 protein OS=Oryza sativa subsp. japonica GN=Os03g0268200 PE=3 SV=1	0.00602107	2.48865	1.40056	1	4	1	1	714	78.625	6.98	High	High	High	High	High	High	High	High	High	Phospho [S295(100); S304(100)]	1	1.32763	0.941278	1.00368	0.611227	0.807247	1.02655	1.02864	0.961476	1	1	1	1	1	1	1	1	1	0.089	0	2.68616	1
FALSE	High	Master Protein	Q7XZZ5	Expressed protein OS=Oryza sativa subsp. japonica GN=Os03g0650800 PE=4 SV=1	0.00696517	2.47586	3.4	1	1	1	1	500	55.36	4.89	High	High	High	High	High	High	High	High	High	Phospho [S186(100)]	1	1.30936	0.635148	1.44444	0.659482	0.731018	0.636384	0.605081	0.668329	1	1	1	1	1	1	1	1	1	0.233	0	9.44603	1
FALSE	High	Master Protein	A0A0P0WA00	40S ribosomal protein S27 (Fragment) OS=Oryza sativa subsp. japonica GN=Os04g0399000 PE=3 SV=1	0.00696517	2.47301	4.16667	1	5	1	1	192	20.419	8.88	High	High	High	High	High	High	High	High	High	Phospho [S133(99.5)]	1	1.17842	0.758172	1.17373	0.965096	0.977296	1.07863	0.935475	0.775696	1	1	1	1	1	1	1	1	1	0.334	0	3.61593	1
FALSE	High	Master Protein	Q6YVT3	Os08g0508600 protein OS=Oryza sativa subsp. japonica GN=Os08g0508600 PE=2 SV=1	0.00696517	2.47044	5.05051	1	2	1	1	198	21.293	4.5	High	High	High	High	High	High	High	High	High	Phospho [S95(100); T99(100)]	1	0.923655	0.92888	1.08578	1.09176	1.02421	1.30118	1.14197	1.31374	1	1	1	1	1	1	1	1	1	0.166	0	5.53327	1
FALSE	High	Master Protein	Q5Z6P9	Os06g0264300 protein OS=Oryza sativa subsp. japonica GN=Os06g0264300 PE=2 SV=1	0.00696517	2.44539	4.11622	1	2	1	1	413	43.05	4.77	High	High	High	High	High	High	High	High	High	Phospho [S496(100); S498(100)]	1	1.29007	0.927926	0.916704	0.783135	0.797474	0.838095	0.876887	0.892713	1	1	1	1	1	1	1	1	1	0.105	0	4.86954	1
FALSE	High	Master Protein	Q7XAL6	Os07g0409100 protein OS=Oryza sativa subsp. japonica GN=P0492E07.115 PE=4 SV=1	0.00696517	2.42946	1.94175	1	4	1	1	515	55.343	8.46	High	High	High	High	High	High	High	High	High	Phospho [S38(100); S41(99.1)]	1	0.92467	0.91076	1.24801	1.07668	1.13464	1.62316	1.20056	1.29202	1	1	1	1	1	1	1	1	1	0.778	0	2.26929	1
FALSE	High	Master Protein	Q0DPL9	Os03g0681300 protein (Fragment) OS=Oryza sativa subsp. japonica GN=Os03g0681300 PE=4 SV=1	0.00696517	2.42205	22.7273	1	1	1	1	66	7.616	9.32	High	High	High	High	High	High	High	High	High	Phospho [S142(97.9)]	1	1.07692	0.947954	0.896181	0.728848	0.702676	0.645854	0.804854	0.671948	1	1	1	1	1	1	1	1	1	0.064	0	2.25663	1
FALSE	High	Master Protein	Q0J1C5	Os09g0450300 protein OS=Oryza sativa subsp. japonica GN=Os09g0450300 PE=4 SV=2	0.00696517	2.41839	2.01681	1	2	1	1	595	67.291	7.46	High	High	High	High	High	High	High	High	High	Phospho [S1072(99.4); S1076(100)]	1	1.1429	0.867845	0.918658	0.7007	0.774996	0.750024	0.68768	0.638169	1	1	1	1	1	1	1	1	1	0.03	0	11.9622	1
FALSE	High	Master Protein	A0A0P0X6Z4	Patatin OS=Oryza sativa subsp. japonica GN=Os07g0520900 PE=3 SV=1	0.00696517	2.41443	0.734095	1	7	1	1	1226	134.282	6.93	High	High	High	High	High	High	High	High	High	Phospho [S340(100)]	1	1.04241	1.05477	0.99391	0.944989	0.998797	1.01045	1.09491	0.962683	1	1	1	1	1	1	1	1	1	0.046	0	4.91602	1
FALSE	High	Master Protein	Q7XHR2	Os07g0490200 protein OS=Oryza sativa subsp. japonica GN=Os07g0490200 PE=4 SV=1	0.00724988	2.40263	0.862999	1	2	1	1	927	103.549	7.68	High	High	High	High	High	High	High	High	High	Phospho [S236(100)]	1	0.815049	0.840188	0.856111	0.85049	0.891294	1.03981	1.13717	1.08453	1	1	1	1	1	1	1	1	1	0.089	0	2.81387	1
FALSE	High	Master Protein	Q0DY90	Os02g0708500 protein OS=Oryza sativa subsp. japonica GN=Os02g0708500 PE=2 SV=1	0.00724988	2.40044	3.44037	1	1	1	1	436	49.058	6	High	High	High	High	High	High	High	High	High	Phospho [S117(100)]	1	1.11245	1.15395	1.2138	1.08071	1.03202	1.29834	1.14293	1.33183	1	1	1	1	1	1	1	1	1	0.334	0	1.98993	1
FALSE	High	Master Protein	Q7Y0C9	Cytochrome b6f complex subunit, putative, expressed OS=Oryza sativa subsp. japonica GN=OSJNBa0079B15.15 PE=3 SV=1	0.00724988	2.39696	7.62712	1	1	1	1	118	11.982	9.83	High	High	High	High	High	High	High	High	High	Phospho [S313(100); S315(97.6)]	1	1.24744	1.20068	1.41122	1.14505	1.19914	1.44512	1.25915	1.37405	1	1	1	1	1	1	1	1	1	0.07	0	4.85598	1
FALSE	High	Master Protein	A0A0P0VST4	Os03g0138100 protein OS=Oryza sativa subsp. japonica GN=Os03g0138100 PE=4 SV=1	0.00724988	2.39362	1.55521	1	2	1	1	643	73.558	9.86	High	High	High	High	High	High	High	High	High	Phospho [S6(100)]	1	1.27282	0.861169	1.07503	1.12796	0.771087	0.760441	0.92587	0.764838	1	1	1	1	1	1	1	1	1	0.145	0	2.71362	1
FALSE	High	Master Protein	Q6Z4H0	Probable 6-phosphogluconolactonase 2 OS=Oryza sativa subsp. japonica GN=Os07g0604000 PE=2 SV=1	0.00724988	2.36906	3.21429	1	1	1	1	280	31.224	4.74	High	High	High	High	High	High	High	High	High	Phospho [S444(100)]	1	1.11651	1.06621	0.943091	0.993244	1.04668	1.18754	1.22841	1.27875	1	1	1	1	1	1	1	1	1	0.059	0	1.9897	1
FALSE	High	Master Protein	Q65X38	Os05g0545000 protein OS=Oryza sativa subsp. japonica GN=Os05g0545000 PE=2 SV=1	0.00724988	2.35853	1.63132	1	1	1	1	613	69.96	8.16	High	High	High	High	High	High	High	High	High	Phospho [S287(100)]	1	1.00587	1.29605	1.37017	1.29785	1.17764	0.655324	1.17367	1.06161	1	1	1	1	1	1	1	1	1	0.233	0	2.24427	1
FALSE	High	Master Protein	Q67WJ8	Aquaporin NIP2-2 OS=Oryza sativa subsp. japonica GN=NIP2-2 PE=2 SV=1	0.00724988	2.32175	4.69799	1	1	1	1	298	31.806	7.46	High	High	High	High	High	High	High	High	High	Phospho [S264(100)]	1	0.972375	0.926973	1.18351	0.900756	0.840475	1.13072	0.829826	0.908396	1	1	1	1	1	1	1	1	1	0.166	0	2.92269	1
FALSE	High	Master Protein	Q7Y180	Acidic leucine-rich nuclear phosphoprotein 32-related protein 2 OS=Oryza sativa subsp. japonica GN=Os03g0668900 PE=2 SV=1	0.00724988	2.32139	4.41176	1	1	1	1	272	28.725	4.09	High	High	High	High	High	High	High	High	High	Phospho [S1064(99.2)]	1	0.93076	0.719072	0.774019	0.837421	0.637197	1.06537	1.02191	1.09176	1	1	1	1	1	1	1	1	1	0.022	0	1.93381	1
FALSE	High	Master Protein	Q8S1X0	Os01g0754200 protein OS=Oryza sativa subsp. japonica GN=P0503C12.17-1 PE=2 SV=1	0.00724988	2.31596	0.558659	1	1	1	1	1790	207.109	9.22	High	High	High	High	High	High	High	High	High	Phospho [S142(100)]	1	0.757194	0.720979	0.638174	0.724827	0.509171	0.519903	0.548415	0.553724	1	1	1	1	1	1	1	1	1	0.166	0	2.14351	1
FALSE	High	Master Protein	Q0DTD2	Os03g0255200 protein OS=Oryza sativa subsp. japonica GN=Os03g0255200 PE=4 SV=1	0.00724988	2.28668	3.19149	1	1	1	1	282	31.486	10.05	High	High	High	High	High	High	High	High	High	Phospho [T23(100)]	1	1.47074	1.04809	1.00857	0.828374	0.995865	0.796427	0.884571	0.74433	1	1	1	1	1	1	1	1	1	0.08	0	7.36305	1
FALSE	High	Master Protein	Q337X4	Os10g0431900 protein OS=Oryza sativa subsp. japonica GN=Os10g0431900 PE=3 SV=1	0.00724988	2.28358	2.89474	1	3	1	1	380	41.4	8.16	High	High	High	High	High	High	High	High	High	Phospho [S432(100)]	1	1.20177	1.13487	1.15125	1.08573	1.12291	1.32296	1.19191	1.24135	1	1	1	1	1	1	1	1	1	0.093	0	2.24826	1
FALSE	High	Master Protein	Q0JHE8	Os01g0867800 protein OS=Oryza sativa subsp. japonica GN=Os01g0867800 PE=2 SV=1	0.00724988	2.27926	2.05011	1	1	1	1	439	49.286	6.96	High	High	High	High	High	High	High	High	High	Phospho [S600(99.7)]	1	1.05155	0.633241	0.692903	0.566994	0.612765	1.05875	1.25722	0.997668	1	1	1	1	1	1	1	1	1	0.056	0	2.15564	1
FALSE	High	Master Protein	Q5Z6I7	Embryogenesis transmembrane protein-like OS=Oryza sativa subsp. japonica GN=Os06g0297400 PE=4 SV=1	0.00724988	2.27728	1.03306	1	2	1	1	968	106.976	9.39	High	High	High	High	High	High	High	High	High	Phospho [S1006(100)]	1	1.63314	1.07956	1.34476	1.19632	0.981205	1.14114	1.05745	1.00491	1	1	1	1	1	1	1	1	1	0.039	0	2.22391	1
FALSE	High	Master Protein	Q851K9	Os03g0694900 protein OS=Oryza sativa subsp. japonica GN=LOC_Os03g48850 PE=3 SV=1	0.00724988	2.26632	0.759013	1	1	1	1	1054	119.588	6.76	High	High	High	High	High	High	High	High	High	Phospho [S248(100)]	1	1.10534	0.91076	0.903999	0.798214	0.779882	0.982039	0.868243	0.870999	1	1	1	1	1	1	1	1	1	0.042	0	4.87659	1
FALSE	High	Master Protein	Q94LU7	Chloroplast outer membrane protein, putative, expressed OS=Oryza sativa subsp. japonica GN=OSJNBa0082M15.3 PE=4 SV=1	0.00724988	2.26273	0.793651	1	2	1	1	1008	109.036	5.02	High	High	High	High	High	High	High	High	High	Phospho [S988(99.4)]	1	1.00486	1.11008	0.981205	0.858533	0.871748	0.815367	0.83847	0.881856	1	1	1	1	1	1	1	1	1	0.041	0	2.64952	1
FALSE	High	Master Protein	Q5Z8W3	GHMP kinase-like OS=Oryza sativa subsp. japonica GN=P0596H10.38-1 PE=2 SV=1	0.00724988	2.24688	0.905433	1	2	1	1	994	109.06	5.97	High	High	High	High	High	High	High	High	High	Phospho [S812(100)]	1	1.00486	0.889779	1.09066	0.759007	0.951886	1.15629	1.06417	1.18948	1	1	1	1	1	1	1	1	1	0.038	0	4.14406	1
FALSE	High	Master Protein	Q6ZC54	Os08g0110700 protein OS=Oryza sativa subsp. japonica GN=Os08g0110700 PE=2 SV=1	0.00724988	2.23181	1.38741	1	2	1	1	937	104.836	5.87	High	High	High	High	High	High	High	High	High	Phospho [S65(100); S67(100)]	1	1.07489	0.97561	1.04962	1.28579	1.13757	1.67335	1.5588	1.78422	1	1	1	1	1	1	1	1	1	0.066	0	2.52784	1
FALSE	High	Master Protein	Q69RI8	Probable potassium transporter 14 OS=Oryza sativa subsp. japonica GN=HAK14 PE=2 SV=1	0.00724988	2.22301	1.97905	1	1	1	1	859	94.409	6.32	High	High	High	High	High	High	High	High	High	Phospho [S1028(100)]	1	0.97745	0.8173	0.953841	0.753981	0.870771	1.31728	1.23033	1.23412	1	1	1	1	1	1	1	1	1	0.039	0	2.0796	1
FALSE	High	Master Protein	Q336W9	Expressed protein OS=Oryza sativa subsp. japonica GN=Os10g0537300 PE=2 SV=1	0.00724988	2.22134	0.912409	1	1	1	1	1096	119.544	5.48	High	High	High	High	High	High	High	High	High	Phospho [S187(100)]	1	1.13173	0.938417	0.938204	0.877634	0.79161	0.868399	0.79621	0.787759	1	1	1	1	1	1	1	1	1	0.11	0	8.8938	1
FALSE	High	Master Protein	Q84ZR9	Os07g0584500 protein OS=Oryza sativa subsp. japonica GN=OJ1127_E01.125 PE=2 SV=2	0.00724988	2.21375	1.90678	1	3	1	1	472	50.446	6.34	High	High	High	High	High	High	High	High	High	Phospho [S802(100)]	1	0.94294	1.13011	1.18741	1.00229	1.15516	1.99249	1.84694	2.05083	1	1	1	1	1	1	1	1	1	0.047	0	4.54875	1
FALSE	High	Master Protein	Q0J5A8	Os08g0450800 protein (Fragment) OS=Oryza sativa subsp. japonica GN=Os08g0450800 PE=4 SV=1	0.00724988	2.21289	1.95838	1	6	1	1	817	90.717	6.42	High	High	High	High	High	High	High	High	High	Phospho [T91(100)]	1	1.11854	1.04809	1.21185	1.05457	1.03398	1.53698	1.44355	1.68168	1	1	1	1	1	1	1	1	1	0.072	0	9.67992	1
FALSE	High	Master Protein	Q0JD43	OSJNBa0084A10.16 protein OS=Oryza sativa subsp. japonica GN=Os04g0432400 PE=2 SV=1	0.00724988	2.21155	1.91638	1	7	1	1	574	64.37	6.7	High	High	High	High	High	High	High	High	High	Phospho [S118(100)]	1	1.18248	0.851632	1.09164	1.01536	0.892271	1.90347	1.287	1.72149	1	1	1	1	1	1	1	1	1	0.122	0	2.24105	1
FALSE	High	Master Protein	Q7Y0B7	Myb-like DNA-binding domain, SHAQKYF class family protein, expressed OS=Oryza sativa subsp. japonica GN=OSJNBa0079B15.28 PE=2 SV=1	0.00724988	2.19098	3.16092	1	1	1	1	348	37.277	7.44	High	High	High	High	High	High	High	High	High	Phospho [S540(100)]	1	0.96121	0.61226	0.647947	0.611227	0.613742	0.622179	0.572426	0.79741	1	1	1	1	1	1	1	1	1	0.075	0	2.86417	1
FALSE	High	Master Protein	Q2QP91	Dor1-like family protein, expressed OS=Oryza sativa subsp. japonica GN=Os12g0538300 PE=2 SV=1	0.00724988	2.18522	1.31148	1	1	1	1	610	66.668	5.17	High	High	High	High	High	High	High	High	High	Phospho [T498(100)]	1	1.01501	1.00613	1.076	0.834406	1.08382	1.19417	1.06513	1.12675	1	1	1	1	1	1	1	1	1	0.068	0	2.06435	1
[truncated: 94 more rows]
