# Supplementary material for: The Phosphoproteomic Response of Rice Seedlings to Cadmium Stress
Source: Int J Mol Sci. 2017 Sep 27;18(10):2055. doi: 10.3390/ijms18102055 (PMC5666737; doi:10.3390/ijms18102055)
Supplement: Supplementary file 1 [file ijms-18-02055-s001.zip › Additional file 3-Table S3.xlsx]

## Sheet: Table S3
Table S3. Motif-X analysis of unique phosphopeptides.
Motif	Motif Score	Foreground Matches	Foreground Size	Background Matches	Background Size	Fold Increase
[sxS]	16	476	2453	119379	1005886	1.64
[sD]	16	385	1977	46888	886507	2.98
[sP]	16	376	1665	40114	839619	3.77
[Rxxs]	16	248	1365	43548	799505	2.54
[sS]	15.65	197	791	88280	634859	1.79
[sE]	16	157	1176	48167	755957	2.1
[sG]	15.65	120	594	49890	546579	2.21
[Dxxxxs]	15.26	117	1019	35981	707790	2.26
[sxxR]	14.31	111	902	36950	671809	2.24
[SxsP]	32	105	2558	7218	1013104	5.76
[sxxxxS]	8.22	58	247	85572	804089	2.21
[Kxxs]	11.55	54	301	53490	857579	2.88
[tP]	13.72	50	209	48939	692063	3.38
The lower case letters “s” and “t” indicate phosphoserine and phosphothreonine respectively, “x” represents any amino acid and upper case letters represent conserved residues.
