# Supplementary material for: The Phosphoproteomic Response of Rice Seedlings to Cadmium Stress
Source: Int J Mol Sci. 2017 Sep 27;18(10):2055. doi: 10.3390/ijms18102055 (PMC5666737; doi:10.3390/ijms18102055)
Supplement: Supplementary file 1 [file ijms-18-02055-s001.zip › Additional file 4-Table S4.xlsx]

## Sheet: Table S4
Additional file 4-Table S4: 482 differently phosphorylated proteins identified in the study
accession		description	function	Phosphopeptides	Phosphorylation sites	Phosintensity of NC	Phosintensity of M10	Phosintensity of H100	M10/ NC		H100 /NC
									P value	regulation	Pvalue	regulation
protein kinase/ phosphotase
Q5Z754	Os06g0334400	Cyclin-dependent kinase F-1,CDKF-1	protein kinase/ phosphotase	DEDDDS(ph)TEEWANFR.	443	0.991667	0.958333	1.20233			0.0243241	up
				GGDS(ph)DSDFDEFGSMDVTK	457
Q5JK68	Os01g0958000	Cyclin-dependent kinase C-2 ,CDKC-2	protein kinase/ phosphotase	SFSSDHNGNLT(ph)NR	198	1.03033	1.02833	1.583			0.00463244	up
Q84SL0	Os07g0568600	Calcium-dependent protein kinase 20	protein kinase/ phosphotase; signaling ; response to hormone	DGS(ph)LQLTTTQ	543	0.879667	0.646	0.726333	0.0253334	down
Q9FXQ3	Os04g0584600	Calcium-dependent protein kinase 13,CDPK13	protein kinase/ phosphotase; signaling ,response to hormone	HDTDDNNNAAAADS(ph)PK	37	0.938	1.006	1.67633			0.000867033	up
				NS(ph)LNIS(ph)MR	539543
Q93W00	Os01g0367700	cyclin-dependent protein serine/threonine kinase activity	protein kinase/ phosphotase	SS(ph)PMPAPSTDS(ph)PAADQS(ph)PGR	27,36,42	1.03967	0.976667	1.40833			0.00570951	up
Q5Z7T2	Os06g0714200	CAMK_CAMK_like.30 - CAMK includes calcium/calmodulin depedent protein kinases, expressed	protein kinase/ phosphotase; signaling ; response to hormone	TADDEGGVVTEHQS(ph)PPPANGLPST(ph)PPR	26,36	1.038	1.14167	1.33433			0.00315376	up
				QQAQAQAQQVGT(ph)PR	51
Q10E16	Os03g0711300	CAMK_KIN1/SNF1/Nim1_like.18 - CAMK includes calcium/calmodulin depedent protein kinases, expressed	protein kinase/ phosphotase	SAEDPDGS(ph)FYT(ph)GDDPDR	49,52	0.994333	0.965667	1.297			0.000753692	up
				SFYDGDDPDHLYGS(ph)DDGQPR	92
Q6L4Z4	Os05g0462400	phosphatidate phosphatase activity	protein kinase/ phosphotase	GRPGS(ph)PESNVECQEK	133	0.988667	0.965333	1.42533			0.00409662	up
				SKS(ph)DGDLYIGAK	119
Q69M01	Os02g0191700	serine/threonine-protein phosphatase 2A regulatory subunit B subunitbeta, putative, expressed	protein kinase/ phosphotase	RPS(ph)GVGTGGQSNR	115	1.03867	1.055	1.25867			0.00205596	up
Q7F0H8	Os07g0690400	protein serine/threonine phosphatase activity,Protein phosphatase 2C-like	protein kinase/ phosphotase	LTSPQLS(ph)PK	310	1.20967	0.882	0.609			0.0165951	down
Q84JI0	Os03g0268600	Probable protein phosphatase 2C 30	protein kinase/ phosphotase	LDGGGGEAS(ph)T(ph)DEEDREVER	65,66	0.979667	0.876667	1.31767			0.025403	up
Q6ZKL8	Os08g0500300	Probable protein phosphatase 2C 66	protein kinase/ phosphotase	SPDLIQENES(ph)EEETTEDVAIPDTVAK	415	1.09933	1.141	1.32033			0.0460348	up
Q6ZI44	Os02g0551100	Osmotic stress/abscisic acid-activated protein kinase 6	protein kinase/ phosphotase;signaling; response to hormone	QAHAS(ph)CDLQK	359	1.01067	1.11167	1.35633			0.00813258	up
				NPDDDEGDRDEEEGEEGDS(ph)EDEYTK	345
Q94DL7	Os01g0963600	ABSCISIC ACID-STRESS-RIPENING-INDUCIBLE 2 PROTEIN	protein kinase/ phosphotase; response to stimulus	QQS(ph)GHGGYGYGGGQQQEYYK	73	1.11	0.988667	2.332			0.000154127	up
				VES(ph)HTDDYYSEGGEIDR	41
Q2R4Z4	Os11g0454300	similar to Water stress-inducible protein Rab21	protein kinase/ phosphotase; response to stimulus(water)/hormone	SGSSSSS(ph)SSEDDGMGGR	89	0.979333	0.945667	3.238			0.00347808	up
Q84QW0	Os08g0525000	Ras GTPase family protein(Rab11)	protein kinase/ phosphotase; signaling	AELS(ph)LNR	193	1.09	0.646333	0.439333			0.0190512	down
Q0J0U2	Os09g0499000	SnRK1A protein kinase-interacting negative regulator	protein kinase/ phosphotase	SLS(ph)LSDLQNSGGSC	248	0.975	1.00167	1.21067			0.0233248	up
Q18PR9	Os03g0319100	SNF1-related protein kinase regulatory subunit beta-1, putative	protein kinase/ phosphotase	ACS(ph)VGVVGGGGGAGS(ph)PPGS(ph)PGR	47 59 63	1.00333	1.01833	1.27367			0.0100151	up
Q2QYY8	Os12g0101800	AGC_PVPK_like_kin82y.2 - ACG kinases include homologs to PKA, PKG and PKC, expressed	protein kinase/ phosphotase; receptor; signaling; photoreceptor; response to abiotic stimulus	SLS(ph)ES(ph)SNNT(ph)LK	289292295	0.986	1.27733	1.49167	0.0306872	up	0.00198467	up
				TS(ph)SEDNPQQQQSAAAIPR	106
				DEDPLIDS(ph)DDERPESFEDEFR	381
Q10E10	Os03g0711800	GC_AGC_other_GWLd.2 - ACG kinases include homologs to PKA, PKG and PKC, expressed	protein kinase/ phosphotase; signaling	S(ph)LRAS(ph)PVHPVK	835839	1.04867	1.12167	1.27633			0.00350708	up
				VSNSSINEESDGPS(ph)PK	656
				SSESSSPTDGSNS(ph)PR	26
A0A0P0W3C8	Os03g0724300	LRR receptor-like protein kinase	protein kinase/ phosphotase	EIFPEPSGSRDT(ph)ED	807	1.098	1.11667	1.43233			0.0433721	up
Q8W3C9	Os10g0101000	receptor-like protein kinase, putative, expresse	protein kinase/ phosphotase	QDSVGS(ph)EDWYFPK	722	0.953333	0.760333	1.20767			0.0199003	up
A0A0P0UYG1	Os01g0155500	OsCrRLK1L4,Catharanthus roseus receptor-like kinase1-like kinase 4	protein kinase/ phosphotase	S(ph)AGESETGR	896	1.05233	1.09567	1.615			0.00390806	up
Q7XUF9	Os04g0487200	inactive receptor kinase At1g27190 precursor, putative, expressed	protein kinase/ phosphotase	DVS(ph)EQFDEFPLAYNKDESDTM	604	0.987333	0.974333	1.32933			0.00215761	up
Q6AVQ3	Os03g0841800	CGMC_GSK.5 - CGMC includes CDA, MAPK, GSK3, and CLKC kinases, expressed	protein kinase/ phosphotase	GEPNIS(ph)YICSR	245	1.09933	1.296	1.61967			0.000894473	up
Q6Z2V3	Os02g0743500	Mitogen-activated protein kinase kinase kinase gene,DSM1	protein kinase/ phosphotase	RS(ph)QEEDEVEER	124	1.02967	1.00167	1.24567			0.0342014	up
				S(ph)QEEEWER	102
				S(ph)QEEEAVR	112
Q0ITY8	Os11g0207200	STE_MEKK_ste11_MAP3K.3 - STE kinases include homologs to sterile 7, sterile 11 and sterile 20 from yeast, expressed	protein kinase/ phosphotase;receptor signaling protein activity	AFGQCPGS(ph)PTAR	113	1.082	0.957333	1.377			0.0127359	up
				GQIPCPTS(ph)PVQSR	100
Q7XAK8	Os07g0106100	leucine rich repeat domain containing protein, putative, expressed	Protein phosphatase 1, regulatory subunit, and related proteins	TGINDNQYFDVDPDELS(ph)PR	421	0.891333	0.879	1.15367			0.0141484	up
Q8H811	Os07g0520400	Leucine Rich Repeat family protein, expressed	protein kinase/ phosphotase	AS(ph)AEVLGK	386	1.086	0.909667	0.799333			0.00483669	down
				SSLGDRPAT(ph)DS(ph)AGEGEEPSL	664666
Q84VG3	Os10g0389800	Leucine-rich repeat transmembrane protein kinase, putative	protein kinase/ phosphotase	NQS(ph)FDDDDDDFS(ph)NKPVAK	378387	1.12333	0.978	0.804333			0.0304981	down
Q5VMI1	Os06g0288100	protein serine/threonine kinase activity protein tyrosine kinase activity	protein kinase/ phosphotase	SGDGSGGQNNNLS(ph)DEESR	236	0.855667	0.840333	1.215			0.0398365	up
A0A0P0VQR0	Os02g0786200	Serine-threonine/tyrosine-protein kinase domain containing protein	protein kinase/ phosphotase	SSGIEATTAEAEALSK	677	0.962667	0.981333	1.33833			8.66e-05	up
				KLEETPAGNTGTDQDSDVHGS(ph)GEQQK	671
Q5JNI5	Os01g0748600	serine/threonine protein kinase, putative, expressed	protein kinase/ phosphotase	QSSMAPDR	23	1.094	1.34	1.39667	0.0295977	up	0.00888468	up
				DRNEGS(ph)TTR	456
				AVTS(ph)PGNACR
Q0DG76	Os05g0549100	serine/threonine-protein kinase SNT7, chloroplast precursor, putative, expressed	protein kinase/ phosphotase	VVRT(ph)INES(ph)MDELS(ph)SQSK	534538543	1.03033	1.34133	1.196	0.00211297	up
Q8H085	Os03g0148700	tyrosine protein kinase domain containing protein	protein kinase/ phosphotase	LAPTDAS(ph)HVS(ph)TQVK	296299	0.976667	1.028	1.17233			0.00523166	up
Q5Z7P1	Os06g0727400	transmembrane receptor protein serine/threonine kinase Cx32, chloroplast precursor,	protein kinase/ phosphotase	ANNENDDDDAAPGMSASKR	33	0.967667	1.03933	1.29767			0.00376695	up
				TTS(ph)STTTGK	38
Q6AVL0	Os03g0602600	kinase, pfkB family, putative, expressed	protein kinase/ phosphotase	TVEELSDNEGEDLGEDLVPSNDR	159	1.03	1.11033	1.39833			0.00156783	up
				SSQDVAEGS(ph)S(ph)DDES(ph)DGETSK	68,69,73
Q2QXA8	Os12g0163800	protein kinase family protein, putative, expressed	protein kinase/ phosphotase	IEEVDPTYDSDASEDGADDGDDLS(ph)VR	134148	0.989667	0.943667	1.32233			0.00575631	up
				FQDQGGNMTAETGTYR	413
Q0DP22	Os03g0721200	HEAT repeat family protein, putative	protein kinase/ phosphotase; response to stimulus	LPEES(ph)DGS(ph)ES(ph)S(ph)DDDKR	1249 1252 1254 1255	1.003	0.956333	1.22767			0.00857233	up
				HNACGGGGGDGES(ph)PPSPLPSR	20
Q6L4R9	Os05g0592500	SIT4 phosphatase-associated protein family protein	protein kinase/ phosphotase	GRDS(ph)DDDDFR	507	1.00067	1.03533	1.20133			0.022059	up
				DYDVAALANNLS(ph)QAFR	527
Q7XXN2	Os09g0544300	protein kinase family protein, putative, expressed	protein kinase/ phosphotase	QQS(ph)IHPPPAFGS(ph)STNLEALALEASK	166 175	0.948667	1.017	1.282			0.0294974	up
				AVQVSPILDGNQT(ph)DADSNTAGEEVASR	145
Q10BA4	Os03g0825800	protein kinase domain containing protein	protein kinase/ phosphotase	QFSTTSQGK	11	1.02633	1.03733	1.34467			0.00338905	up
				QAS(ph)SYSVPSSEISR	45
				MAGGESS(ph)ESEDT(ph)QGK	290 295
Q0DAD7	Os06g0660800	STRUBBELIG-RECEPTOR FAMILY 3 precursor, putative,	protein kinase/ phosphotase	MVNETGEES(ph)E	162	1.00867	0.998667	1.24933			0.0443583	up
Q10MY9	Os03g0289100	Carbon catabolite derepressing protein kinase, putative, expressed	protein kinase/ phosphotase	T(ph)SCGSPNYAAPEVISGK	216	1.01867	1.25767	1.38467	0.00391335	up	0.0213483	up
A0A0P0XAR4	Os08g0103000	protein kinase family protein	protein kinase/ phosphotase	QGNQEGQMT(ph)AETGTYR	79	1.05333	1.04333	1.74067			0.0141593	up
Q10GG7	Os03g43010	H1flk, putative, expressed	protein kinase/ phosphotase	VDPDTGDITENYWEPADADAAS(ph)PPPTR	388	1.089	1.246	1.585			0.0193287	up
Q0JBE1	Os04g0538700	Autophagy-related protein 13 domain containing protein	protein kinase/ phosphotase, signaling complex	VGETGTSSAQQS(ph)PSER	351	1.009	0.929333	1.40633			0.0477503	up
Q0J035	Os09g0533100	Pantothenate kinase 2	protein kinase/ phosphotase	GGVDS(ph)PSWR	166	0.958333	0.872	1.16767			0.00711167	up
A0A0N7KJ06	Os04g0405800	amino acid kinase, putative, expressed	protein kinase/ phosphotase	ALVAS(ph)DDDNKPR	22	1.06167	1.29267	1.683	0.0346026	up	0.00110707	up
Q6AVA8	Os05g0405000	Pyruvate, phosphate dikinase 1,PPDK1	protein kinase/ phosphotase;photosynthesis	GGMT(ph)SHAAVVAR	527	0.983667	1.04967	1.227			0.0394823	up
Q0J5A8	Os08g0450800	phosphatidylinositol phosphate kinase activity	protein kinase/ phosphotase			1.02433	1.11467	1.96333			0.000332994	up
Q5SMQ9	Os02g0743400	Auxin efflux carrier component 1a(OsPIN1a)	protein kinase/ phosphotase, specific efflux transmembrane transporter; homeostatic preocess; signaling; response to stimulus/hormone;endoplasmic reticulum	DDFS(ph)FGNR	392	1.02067	0.701667	0.447333	0.0154822	down	0.00107793	down
A0A0P0XT28	Os10g0350500	nucleoside-triphosphatase	protein kinase/ phosphotase	LSSS(ph)LQDLPTFSR	35	0.981	0.947	1.297			0.00440535	up
Q6ATB2	Os05g0161500	Probable GTP diphosphokinase CRSH2, chloroplastic	protein kinase/ phosphotase; response to stimulus/starvation	LTPAGS(ph)GGR	36	1.14433	1.345	0.600667			0.00598031	down
Q0D4F7	Os07g0628700	TKL_IRAK_DUF26-lc.24 - DUF26 kinases have homology to DUF26 containing loci,Similar to Receptor protein kinase	protein kinase/ phosphotase; response to stimulus; defense response	LFGDDQSQETT(ph)NR	504	1.08033	1.539	1.21767	0.00466517	up
				SDS(ph)SSLDEILR	584
				LSLSYS(ph)SR	319
Q7X8W5	Os05g0164100	Similar to Fructose-6-phosphate 2-kinase/fructose-2,6-bisphosphatase	protein kinase/ phosphotase	S(ph)SS(ph)GPLNK	113 115	1.07	0.650333	0.48	0.00908206	down	0.000562316	down
				SNYS(ph)GSLSSSVPGAS(ph)GSAR	95 106
				NAS(ph)FGGAASNS(ph)GPVPNAGDR	74 82
				KVS(ph)GPLDSAAS(ph)K	177 185
				SS(ph)GPQS(ph)GGVTPMAR	129 133
tf/translation
A0A0P0WTV3	Os06g0182100	ethylene-responsive element-binding protein, putative, expressed	stress-related	SLS(ph)VGGGGGGGK	228	1.15233	0.708333	0.685333	0.0382866	down	0.0304769	down
Q8LN31	Os10g38970	ethylene-responsive element-binding protein, putative, expressed	stress-related	NQNPQPES(ph)PSNQSR	188	1.07233	0.914	0.640333			0.00650904	down
A0A0P0XZL7	Os11g0158832	Similar to Associated with HOX family protein	tf/translation	EDS(ph)EGVS(ph)GGGT(ph)EDGGGAK	214 218 222	0.995667	1.06733	1.443			0.00242062	up
				S(ph)GGAPPPPEMSTAER	230
Q8H991	Os06g0229300	HOX family protein, HOX1a	tf/translation	GNLEDS(ph)ETDS(ph)LAESPQGGK	556 600	1.01267	1.06033	1.43333			0.00942816	up
				QIDASDLPS(ph)DDS(ph)ADNDYDPTLAQGHK	346 349
Q5KQP1	Os03g0680800	Associated with HOX family protein, expressed	tf/translation	DQAEAGKS(ph)DNKEAEGGSK	231	1.043	1.01833	1.25867			0.0218572	up
Q2QLM6	Os12g0636200	Associated with HOX family protein	tf/translation	EEIGDLEQDSNS(ph)SSDNAPR	467	0.999333	0.980333	1.389			0.0330587	up
A0A0P0XKY3	Os09g0299200	MYB-type transcription factor, Reguration of high-affinity potassium transporter, Salt tolerance	tf/translation	TDPST(ph)PAPTSES(ph)PTQGVPSNR	201 208	1.03	1.027	1.44733			0.0069455	up
				HEPLT(ph)PDSNCQPGS(ph)PTAS(ph)PK	242 251 255
Q7XXI7	Os04g0105100	zinc finger, C3HC4 type, domain containing protein, expressed	Protein involved in mRNA turnover and stability	VQS(ph)MQQPELQTNPANASR	278	1.056	0.839667	0.982	0.0115019	down
				SQS(ph)LPMNMK	151
Q5JLB5	Os01g0917400	CCCH-Type Zinc finger CCCH domain-containing protein 12,C3H12	tf/translation	LQS(ph)PGAQQTYGTSQQVDASAGNQGMLSPYR	285	1.03967	1.10367	1.309			0.0271978	up
				LLQSPS(ph)ASAYTS	433
A0A0P0X0B1	Os06g0677700	Zinc finger CCCH domain-containing protein 45,ATCPSF30/CPSF30	tf/translation	DDDS(ph)ES(ph)DEEAAPR	672 674	1.007	1.025	1.408			0.00691862	up
Q688U3	Os05g0579300	Zinc-finger homeodomain protein 6 ,OsZHD6	tf/translation	LLIPS(ph)PPT(ph)PR	107 110	1.02067	1.26833	1.24767	0.0115581	up	0.00618134	up
Q0DVU4	Os03g0112700	Zinc finger CCCH domain-containing protein 20 ,Early heading date 4,Ehd4	tf/translation	TLEADISNTSVNQS(ph)PQSK	49	0.977	0.988333	1.43567			0.0325494	up
Q5VM82	Os01g0635550	Zinc-finger homeodomain protein 5,ZHD5	tf/translation	RDPS(ph)PGR	88	1.12033	1.17633	1.43467			0.0326856	up
Q6Z528		Zinc-finger homeodomain protein 10,ZHD10	tf/translation	REQS(ph)PETDR	146	0.948	1.05533	1.17267			0.0255239	up
Q6Z441	Os02g0147800	Homeobox domain containing protein, expressed	tf/translation	SINS(ph)PPRPQDNETCLSPTDK	557	0.939667	1.08833	1.511			0.0135558	up
A0A0P0UYZ1	Os01g0174000	OsbZIP01,transcription factor HY5	tf/translation	VPEMGGGGGSAS(ph)S(ph)GAGADER	206 207	1.011	0.930667	1.30067			0.0190556	up
Q10PC3	Os03g0239400	bZIP transcription factor,OsbZIP26	tf/translation	GS(ph)LGNLDVVATK	148	0.871333	0.922333	1.30467			0.0107788	up
				TKDGS(ph)EHGQGNDASNK	203
Q2R432	Os11g0490900	WRKY transcription factor(OsWRKY72)	tf/translation	S(ph)PHGGDGDGAAGDDGGDAQAAAAGGR	88	0.900333	0.997	3.58367			0.00436459	up
Q5NAL3	Os01g0246700	Similar to WRKY transcription factor 1,OsWRKY1	tf	RS(ph)SS(ph)TGNKDQER	242 244	0.967	1.02567	2.38633			0.000164254	up
Q60DW3	Os05g0419100	PHD finger protein ALFIN-LIKE 5	tf/translation; histone binding	APKPPAPPKDDDES(ph)GDEYADEEEEER	188	0.978667	0.968667	1.353			0.00650708	up
Q7F2Z1	Os01g0887700	PHD finger protein ALFIN-LIKE 6	tf/translation; histone binding	DEEGS(ph)GDDEGEEEEDDHDNTLCGTCGTNDGK	202	1.03267	1.05033	1.46733			0.0142748	up
Q0DY26	Os02g0720000	PHD-finger family protein	tf/translation	LPEGNLNNDAALS(ph)SEK	16	1.048	0.918333	1.424			0.00471755	up
A0A0P0V6D7	Os01g0672300	DDT transcription factor	tf/translation	AATVEES(ph)PRS(ph)S(ph)GADEWGLENR	278 281 282	0.967	1.053	1.28733			0.0178913	up
Q688X7	Os05g0562400	DDT, putative, expressed	tf/translation	DVDDAERDEDS(ph)ECDDADDDPDGDEVNIEEK	452	1.157	1.35267	2.002			0.0122609	up
B7EB50	Os04g0266400	methyl-CpG binding domain containing protein, expressed		RAS(ph)PSGCAR	41	1.048	1.13833	1.46767			0.0149689	up
Q6YYJ6	Os08g0172200	hemimethylated DNA binding domain containing protein, expressed		YEAS(ph)GDEDDDDGSTDS	322	1.038	1.28067	1.993			0.00947271	up
Q2QM23	Os12g0620400	Methyl-CpG binding domain containing protein, expressed	tf/translation	EDAKPAES(ph)EAAPPAPSEGGEK	215	1.035	1.03967	1.283			0.0097969	up
				DAEADKEAPS(ph)EDAPK	150
				EAPS(ph)EDAPKDTDVEMK	172
Q53QT1	Os10g10990	transcription initiation factor IIF, alpha subunit domain containing protein, expressed	tf/translation; photosystem I	GT(ph)PPAS(ph)KS(ph)K	402 406 408	1.054	1.06367	1.295			0.0199193	up
				AAGLNES(ph)DADEDDEDDDQEDESSPVLAPK	354
				NNEEGNNS(ph)DKGEEDEEEEAAR	240
Q0DJF8	Os05g0292200	transcription initiation factor TFIIA large subunit	nuclear tf/translation	APT(ph)PAVGT(ph)PKPR	307 312	1.15467	0.889667	0.998667	0.0322507	down
Q0D934	Os07g0109600	VIP4, putative, expressed	positive regulation of transcription elongation from RNA polymerase II promoter	KT(ph)PSS(ph)PVEEER	198 201	1.041	1.07767	1.30933			0.00437243	up
				HQVVDDDDDEDDVRS(ph)EGHAR	70
				DVFGES(ph)DEDGPAPYR	219
				VMQNDAAGMDS(ph)EDGGYQQWPVASGR	152
				GVVAS(ph)ES(ph)EGSEDDYYAGR	170 172
				DLQPEDVVADEDMRYES(ph)DENR	267
Q2QN51	Os12g0579000	VIP4, putative, expressed	transcription elonging/ nitrogen metablism; phosphoprotein binding	VMQNDAAGMDS(ph)EDEAYQQRPVASR	148	1.02433	0.981	1.30833			0.00565245	up
				ADLDQGES(ph)DGEK	122
				DVFGES(ph)DEDEPAPYR	215
				KAS(ph)SS(ph)PVEEER	195
				QLS(ph)PGFLEDALDEDEEPDHQYGSR	492
				EIDS(ph)DDDS(ph)PPR	638 642
				GVVAS(ph)ES(ph)EGSEDDYYAGR	170 172
				AVVFDS(ph)DDE	660
				DLQPDDVVADEDMRYES(ph)DENR	263
				DQQEIDEDS(ph)HRS(ph)PMEDEGHYEK	233 236
Q5ZCD9	Os01g0155600	splicing factor, arginine/serine-rich, putative, expressed	Alternative splicing factor SRp20/9G8 (RRM superfamily)	GS(ph)PRDS(ph)RS(ph)PKGS(ph)PR	221 225 227 231	1.03467	1.08367	1.27767			0.00175879	up
				DTQS(ph)PRGS(ph)PR	37 41
				RS(ph)AS(ph)PPNGR	251 253
				NRS(ph)PT(ph)PNASR	261 263
				DMSTAANGRS(ph)PS(ph)PR	302 304
				GS(ph)PRDS(ph)RS(ph)PR	211 215 217
				ADS(ph)RS(ph)PADHER	283 285
				DCRNS(ph)PK	149
Q8LHL0	Os07g0623300	Predicted splicing factor, SR protein superfamily		GRDS(ph)VS(ph)PARR	176 178	1.022	1.08167	1.49133			0.00297298	up
				GKHS(ph)QS(ph)PVCKS(ph)PSAK	204 206 211
				S(ph)RS(ph)YT(ph)PDDYR	161 163 165
				S(ph)YS(ph)PDDYR	191 193
				RS(ph)PS(ph)MS(ph)PAR	217 219 221
				RT(ph)PS(ph)SQEGS(ph)PVK	252 254 255
Q10LL5	Os03g0344100	RNA recognition motif containing protein, expressed	Alternative splicing factor ASF/SF2 (RRM superfamily)	S(ph)KSPNAS(ph)PANGEASS(ph)PK	251 257 265	1.036	0.986667	1.44767			0.0128472	up
				S(ph)RS(ph)PDAKS(ph)E	288 290 295
Q8LIB1	Os07g0644300	XPA-binding protein 2, putative, expressed	mRNA splicing factor	LEAAEEEGAGS(ph)EGEEEAGR	335	1.07033	1.09967	1.44767			0.00127845	up
Q6AUG0	U2AF35B	Splicing factor U2af small subunit B		ARS(ph)PVRES(ph)S(ph)EER	280 285 286	1.07467	1.20767	1.53133			0.0142941	up
Q10QA8	Os03g0203000	splicing factor, putative		HDLYEQTNRS(ph)PT(ph)PK	344 346	1.01567	0.811	1.01333	0.0113791	down
Q2RAL9	Os11g0146700	splicing factor, putative		EMS(ph)QS(ph)PVSEDMDES(ph)PHNHQK	304 306 315	0.887333	0.871667	1.162			0.012388	up
Q7XIR8	Os07g0508000	pre-mRNA-splicing factor ATP-dependent RNA helicase PRP16, putative, expressed		EPTITDEDGRGPS(ph)PSHR	127	0.995667	1.18767	1.58867			0.00430585	up
Q5Z7Y7	Os06g0711600	GCIP-interacting family protein-like	Cyclin D-interacting protein GCIP; spliceosmal complex	SDAAQAEGGGGDDDAEQEDAGS(ph)DDGYPQMTEK	118	0.967	1.05533	1.203			0.000274414	up
Q5N8K0	Os01g0698100	Gene suppressor-of-white-apricot protein-like	mRNA splicing factor	AS()PGDLNLSESDPQPSAK	668	1.03833	1.015	1.33867			0.000169614	up
				QEKDS(ph)DDER	707
Q7EYN1	Os08g0379000	expressed protein	spliceosomal complex	SSDS(ph)PDATQHDR	757	0.983333	1.00233	1.37167			0.0140754	up
B7F9Q5	Os06g0474200	FKBP12-interacting protein of 37 kDa	Splicing regulator	DFNSSPS(ph)PTAPPAR	24	1.031	1.01767	1.31867			0.00527728	up
Q6Z1Z8	Os08g0100500	retrotransposon protein, putative, unclassified, expressed	Transcription coactivator	MTSGNFS(ph)PDDQR	1349	1.04933	1.047	1.318			0.00793337	up
Q0D412	Os07g0655500	PWWP domain containing protein, expressed	Transcription coactivator	SSGNLADS(ph)PNSGNEVNK	373	1.01467	1.03767	1.38633			0.010902	up
				GEGS(ph)DLVNDNK	149
Q69SU7	Os02g0553600	Transcriptional coactivator	Transcriptional coactivator	AAGDDGPSES(ph)ADDDIVVAQISK	30	0.973333	0.961667	1.29333			0.0111826	up
Q6H547	Os02g0523500	Transcriptional coactivator p100		LQIWQYGDVES(ph)DEEEQAPAAR	970	1.03733	1.00967	1.28367			0.00454399	up
Q7XRK9	Os04g0445600	transcription factor like protein, putative, expressed	tf/translation	QQHAAS(ph)PNPGGGGGGR	54	1.048	0.835667	0.782			0.0168042	down
Q653S1	Os09g0558200	transcription factor like protein, putative, expressed	tf/translation	AAES(ph)DVNVS(ph)S(ph)PR	209 214 215	1.00167	0.908333	1.52167			0.00437758	up
Q688Y5	Os05g0560600	transcription factor like protein, putative, expressed	tf/translation	EDCWS(ph)EGETEALVR	42	0.973	0.986667	1.285			0.00899726	up
Q84T85	Os03g63670	Transcriptional regulators binding to the GC-rich sequences		EAAGGS(ph)S(ph)DEDDDETR	272 273	1.01333	1.02267	1.345			0.0125943	up
				NPSQNEDKDEDES(ph)EEEEEEEEGPVIPDR	216
Q337R2	Os10g0447600	MT-A70 family protein	Predicted N6-adenine methylase involved in transcription regulation	EKDDGDQGHS(ph)DS(ph)DNER	280 282	0.96	0.961	1.17667			0.0397464	up
Q7X923	Os04g0321600	FACT complex subunit SPT16; response to stimulus	Global transcriptional regulator, cell division control protein	EASNADRENGAES(ph)DS(ph)EEER	1019 1021	0.897667	0.969667	1.09833			0.0267175	up
Q0D5G4	Os07g0563300	B3 domain transcriptional repressor, Regulator of seed germination and seedling development	tf/translation	NQIDLNSQPEREDEQS(ph)PK	941	1.10767	1.20733	1.534			0.0101376	up
Q6YZW8	Os08g0519800	Translational repressor Pumilio/PUF3 and related RNA-binding proteins (Puf superfamily)		LDSSSAEDAQGS(ph)GK	192	1.07433	1.117	1.48433			0.000815087	up
				VEQLCGEGDT(ph)ESDS	1002
				EEPEDDRS(ph)PR	178
Q6K3F7	Os02g0812400	translation initiation factor eIF-2B subunit epsilon, putative, expressed	tf/translation	NRPTVLDQDDDS(ph)DVS(ph)AVEDDDYSK	554 557	1.00233	1.08133	1.25967			0.000427178	up
Q6ZI51	Os02g0595800	eukaryotic translation initiation factor 4B, putative, expressed	tf/translation	DRGS(ph)FGGNR	503	0.863	0.587667	0.601333	0.0352798	down
				FGQRPGS(ph)GSGK	451
Q5Z4V2	Os06g0698674	Translation initiation factor 5 (eIF-5)		S(ph)HDGDNVAADEDDDDDVQWQTDTSLEAAK	221	1.023	1.06433	1.506			0.00784139	up
				AAS(ph)GS(ph)DEDHS(ph)NS(ph)PTR	208 210 215 217
A0A0N7KFQ9	Os02g0631500	Similar to Initiation factor eIF-4 gamma, middle; Up-frameshift suppressor 2,Putative hUPF2	tf/translation	AVES(ph)ES(ph)GEETVDEEGGSAGGGSK	220 222	0.992333	1.03533	1.40067			0.00172481	up
A0A0P0XUJ0	Os10g0392700	Similar to Initiation factor 2 subunit family protein	tf/translation	SAS(ph)SAGDSDGK	169	1.04033	1.077	1.585			0.00129459	up
P35683	Os06g0701100	Eukaryotic initiation factor 4A-1	tf/translation	VHACVGGT(ph)SVR	147	1.08333	1.251	1.43733			0.0151996	up
Q40682	Os03g0406200	Elongation factor 1-delta 2	tf/translation	VESTACSVS(ph)PTADQK	87	1.05933	1.16533	1.587			0.0153887	up
Q40680	Os07g0614500	Elongation factor 1-delta 1	tf/translation	APAADDDDDDDVDLFGEET(ph)EEEK	115	1.04067	0.987333	1.25333			0.0231681	up
A0A0P0WXQ4	Os06g0550000	ribosomal protein L5	tf/translation	VLEQLSGQS(ph)PVFSK	63	1.05533	1.06833	1.434			0.00551942	up
Q7XUV4	Os04g0461100	plastid-specific 30S ribosomal protein 3, chloroplast precursor, putative, expressed		QVGGGDAS(ph)AGEEAQEYK	83	1.07167	1.048	0.826			0.00588843	down
Q8LH97	Os07g0622100	40S ribosomal protein S6	tf/translation	ERRS(ph)ES(ph)LAK	229 231	1.05133	0.570667	1.36233	0.0128368	down
				S(ph)KLS(ph)SAAK	237 240
Q7XIK5	Os04g0613600	ribosomal protein S17, putative, expressed	tf/translation	VIPAGSTGGS(ph)GGK	152	1.02967	1.15167	1.257			0.0109567	up
Q6YUV4	Os02g0189000	ribosome, putative, expressed	tf/translation	FPEDDADS(ph)EAAR	126	1.10333	1.052	1.461			0.0206876	up
Q9LGR0	Os01g0184900	SSRP1-like FACT complex subunit, putative, expressed	tf/translation;respone to stimulus	GAAAMDVDS(ph)GS(ph)GGNES(ph)D	633 635 640	1.03933	1.12	1.50933			0.00210577	up
				NQAGDEES(ph)DEEDEDFVADK	480
Q5QLH2	Os01g0527400	BAH domain containing protein, expressed	tf/translation	RPAEES(ph)EEDEEEEEEEAK	113	0.998667	0.982667	1.424			0.00436344	up
Q69XZ5	Os06g0472400	tm-1GCR237 protein, putative, expressed	tf/translation	ASNTIS(ph)PENSMVQTNQDVNTK	425	0.994	1.14467	1.557			0.000323926	up
Q7XTV6	Os04g0648900	ETHYLENE RESPONSE FACTOR 8,ERF8	tf/translation	NPDLNQAPS(ph)PENS(ph)DAE	226 230	1.05467	1.09833	1.306			0.0102306	up
Q2R2Z2	Os11g0544700	histone-like transcription factor and archaeal histone, putative, expressed	tf/translation; protein dimerization activity	VPDLGGADS(ph)CGDDR	95	0.930333	0.913333	1.35367			0.00115921	up
A0A0P0XX67	Os10g0556200	basic helix-loop-helix protein 113,OsbHLH113	tf/translation; protein dimerization activity	ACAS(ph)QGS(ph)AAPGR	171 174	0.956	1.146	1.41233			0.0100348	up
Q7XI22	Os07g0186400	ES43 protein, putative, expressed	tf/translation	MAENS(ph)HEATAQSEEK	199	1.088	1.022	1.49667			0.00291934	up
Q53PP7	Os11g0163500	SANT domain transcription factor	tf/translation	NHGS(ph)DEEEHDMNEDAADGK	136	1.128	1.20367	1.79			0.0101923	up
Q69JI7	Os09g0475400	BHLH protein family-like,transcription factor BIM2, putative, expressed	tf/translation; protein dimerization activity	S(ph)SGGAGFDDDDGVAAR	170	0.97	0.783333	0.758			0.00907622	down
Q2QXD6	Os12g0160900	transposon protein, putative, unclassified, expressed	tf/translation	TNESAEDIQCTQTS(ph)PESR	513	0.939	0.788667	1.41967			0.00491926	up
A0A0P0YBA4	Os12g0561200	PAPA-1-like conserved region family protein	tf/translation	EIHLNAPS(ph)PDR	90	1.02867	0.986333	1.40967			0.00561866	up
A0A0P0VK79	Os02g0550900	transposon protein;FAR1 DNA binding domain domain containing protein	tf/translation	VMEGQGAVTNS(ph)GDEMGMR	108	1.122	1.18567	1.49067			0.0187431	up
Q6AT58	Os03g0655600	transposon protein, putative, unclassified, expressed	tf/translation	EEQKS(ph)GAEDGEQSQTWR	657	0.941	0.949667	1.287			0.0137232	up
Q67VC7	Os06g0237300	OsLIM - LIM domain protein, putative actin-binding protein and transcription factor, expressed	tf/translation	ES(ph)SEPERDTASDQLAEQPSESR	923	1.016	0.988	1.98133			0.000704911	up
Q2QM93	Os12g0613000	CCAAT-box transcription factor complex WHAP5, putative, expressed	tf/translation	DSGQPSTS(ph)PSSK	198	1.013	0.957333	1.31033			0.0140172	up
Q7Y0B7	Os03g0764600	Myb-like DNA-binding domain, SHAQKYF class family protein, expressed	tf/translation	GSDADS(ph)ENDRR	118	1.01133	0.999667	1.637			0.0385833	up
Q336P5	Os10g0575000	transcription factor MYC2	tf/translation; protein dimerization activity	SES(ph)DHS(ph)DLEASVR	480 483	1.00233	1.04833	1.437			0.00499674	up
Q0E2W4	Os02g0208600	transcription factor S-II, central domain containing protein	tf/translation	LES(ph)PKDEVGSNLGPVEQR	625	0.910667	0.699667	0.854	0.011413	down
Q0D3X9	Os07g0660200	SNF2 family protein	tf/translation	EEGEIS(ph)ES(ph)EAETK	582 584	1.07167	1.10267	1.33067			0.0116871	up
Q5W770	Os05g0352700	TATA box-binding protein-associated factor RNA polymerase I subunit B	nuclear tf/translation	SLNTLQNLHDEAS(ph)DDERPVS(ph)D	626 633	0.906333	1.25833	1.456	0.0217483	up	0.0018943	up
Q10F25	Os03g0684000	GATA transcription factor 18	tf/translation	VESSVVATEQSNAAVS(ph)PSGIDNK	275	0.959667	1.203	1.09267	0.0495808	up
Q0D5J1	Os07g0557500	Putative transcription factor 5qNCA, contains JmjC domain		AATSDPPPEDDEEEGT(ph)PAPPR	264	1.02567	1.04367	1.243			0.00413374	up
				IS(ph)PGS(ph)SEPAASLPS(ph)PVTTK	377 386 389
				NVNASPAS(ph)PPAATSDVTR	357
stress-related
Q7F1J8	Os08g0522600	chaperone protein dnaJ 10, putative, expressed,OsDjC65	stress-related	NIDNMDDNDGS(ph)S(ph)PDT(ph)S(ph)PR	339 340 343 344	1.023	1.00967	1.27667			0.00953308	up
Q8H903	Os10g0462900	Similar to mitochondrial chaperonin-60	stress-related	NVVIEQSYGS(ph)PK	77	1.05233	1.16733	1.38467			0.0091298	up
Q6EUP4	Os02g0580300	14-3-3-like protein GF14-E	stress-related	EAPKGES(ph)GDGQ	258	1.076	1.11833	1.29633			0.0170091	up
A0A0P0WSW0	Os06g0143900	expressed protein	stress-related	EGEEQWGTNNEGTSS(ph)A	337	1.076	1.11833	1.29633			0.0239501	up
Q6Z0G0	Os08g0338700	GrpE protein homolog	stress-related ;mitochondrial matrix; protein dimerization activity; ATPase regulator activity; chaperone binding	VLRPAEVGVTEGGPIEEEPEEKS(ph)DKS(ph)D	307 310	1.01867	1.11533	1.39733			0.00522195	up
Q6L529	Os05g0512400	Q calmodulin-binding motif family protein, putative, expressed	stress-related ;chaperone binding	VQELHDEAEQEHGS(ph)DADESSETSSSAEAEAR		1.428	1.44167	2.25467			0.042794	up
Q6Z7B0	Os02g0115900	Heat shock 70 kDa protein BIP1	stress-related	AEDKGT(ph)GK	524	1.05967	1.17967	1.56667			0.00450812	up
Q94H83	Os03g28310	Similar to DnaJ homolog subfamily B member 4 (Heat shock 40 kDa protein 1 homolog)	stress-related	ESGGDDES(ph)LAS(ph)DDS(ph)TAR	369 472 475	1.04367	1.02667	1.71867			3.4e-05	up
Q652G4	Os06g0256300	calmodulin-binding heat-shock protein, putative, expressed	stress-related	LQS(ph)FEEEHK	367	1.05033	0.968	0.724333			0.00811631	down
Q6Z7S3	Os02g0741100	heat shock protein DnaJ, putative, expressed	stress-related	ES(ph)KSDDDQTVK	387	1.065	0.757333	0.746333	0.0373354	down	0.0180566	down
Q6Z7V2	Os02g0758000	24.1 kDa heat shock protein, mitochondrial,HSP24.1	stress-related ; response to stimulus; response to osmotic stress	HERDES(ph)DDDSGR	58	0.919	1.28567	1.38833	0.0052469	up	0.0124475	up
A0A0P0W4U5	Os03g0822800	heat shock protein DnaJ, putative, expressed,OsDjC36	stress-related			1.063	1.48767	1.60533			0.0173654	up
A0A0P0XYL0	Os10g0575200	Similar to GRV2 (GRAVITROPISM DEFECTIVE 2); binding / heat shock protein binding	stress-related	TDDIVPGSSVTEDAS(ph)DSETLPR	73	1.00567	1.06133	1.21267			0.0285854	up
Q75M67	Os03g0381300	CS domain containing protein, putative, expressed	HSP90 co-chaperone p23	LGMGGPDDDLEDDDEDDT(ph)ADS(ph)ANKDDEDIK	146 149	0.956333	0.898	1.26167			0.0286953	up
Q6K832	Os02g0780700	Lipase class 3 protein-like	Predicted lipase/calmodulin-binding heat-shock protein	VDS(ph)DGEDIIDHHVDEDR	493	0.995667	0.946	1.25633			0.0125059	up
Q0DT06	Os03g0277100	SLT1 protein,HSP20-like chaperone domain containing protein		DSS(ph)PTAMEEDCSNSNSDK	67	1.10133	1.095	1.787			0.00226374	up
Q6YUA1	Os02g0100300	HSP40	stress-related	DATPEPDELDQDIVES(ph)DLELEGDIVESDHQDPPQK	93	1.10567	0.844333	1.193	0.0292134	down
Q2QQD1	Os12g0498500	heat shock protein DnaJ, putative, expressed	stress-related	SAS(ph)TDEVK	126	0.91	0.666	0.811333	0.0130672	down
A0A0P0W604	Os04g0107900	heat shock protein,OsHSP1	stress-related ;response to stimulus	EIS(ph)DDEDDDIDDSK	227	0.961667	1.12567	2.549			0.00653204	up
Q5JK78	Os01g0550100	ubiquitin carboxyl-terminal hydrolase 6, putative, expressed	stress-related	ENEGSS(ph)SNAGESSSMDIDK	380	1.016	0.972667	1.476			0.00338856	up
Q0J4A3	Os08g0526400	proteophosphoglycan ppg4, putative, expressed Defence response, Rin4 domain containing protein	stress-related ;ubiquitin-protein transferase activity	MFNPNDPVDNPEAFSSSIAAPS(ph)PSR	64	0.999333	0.938333	1.28633			0.00808508	up
				HAAGGGET(ph)PPAR	108
				APS(ph)DAPPPPPPAPYAGGS(ph)PYHR	81 96
Q5Z880	Os06g0301000	E3 ubiquitin-protein ligase synoviolin, OsHrd1	stress-related ;signaling ;ubiquitin-protein transferase activity; endoplasmic reticulum membrane; response to topological incorrect protein	YSTPPQSTSNGPQSGEASTSNQS(ph)PK	425	0.913333	1.03867	1.33767			0.00626016	up
A0A0P0WM72	Os05g0409000	ubiquitin-associated (UBA)/TS-N domain-containing protein	stress-related	S(ph)AAKAPK	84	0.962	1.17533	1.29933			0.00977451	up
Q653U9	Os06g0677300	zinc finger, C3HC4 type, domain containing protein, expressed	stress-related	INIS(ph)PS(ph)PSSTR	59 61	1.00333	1.03067	1.41067			0.00790661	up
Q5ZBT1	Os01g0796700	zinc finger C3HC4 type family protein, putative, expressed	Predicted E3 ubiquitin ligase	TIAPDIAPTGS(ph)DNEDREEGNAIDTTK	255	1.01967	1.10433	1.275			0.00205992	up
Q0E4T3	Os02g0101700	HECT-domain domain containing protein	E3 ubiquitin protein ligase	SAS(ph)PDDDLAAK	368	1.02833	1.08133	1.262			0.00219516	up
Q0IXI6	Os10g0431000	transposon protein, putative, CACTA, En/Spm sub-class, expressed	Predicted E3 ubiquitin ligase	VRS(ph)PAVS(ph)AAS(ph)KEEPK	389 393 396	1.02033	0.942333	1.24633			0.0066561	up
P16081	Os08g0468100	Nitrate reductase [NADH] 1,NIA1	stress-related ; oxidoreductase activity, acting on nitrogenous as donors; nitrogen cycle metabolic process	RADS(ph)PVR	44	0.897667	0.81	0.680333			0.0264603	down
				KPPS(ph)DGS(ph)DDEEEEQEDWR	64 67
				STS(ph)TPFMNTTDGK	532
Q0JDT2	Os04g0379600	nitrate-induced NOI protein	stress-related	EVGGGIGS(ph)APRS(ph)PYR	98 102	0.948	0.83	1.397			0.00140106	up
				DDKLS(ph)PNTSTR	197
				RHS(ph)LSQQR	85
B9GCH9	Os12g0234800	Urease	nitrogen cycle metabolic process	LPISSS(ph)PDAAEDNDNFR	664	0.983	1.01333	1.28933			0.00942205	up
A0A0P0VIH5	Os02g0437200	SNARE domain containing protein, putative, expressed,oluble N-ethylmaleimide-sensitive factor attachment protein receptor,OsSNAP32	stress-related	SSNPFDS(ph)DS(ph)DDGGR	22 24	1.02467	0.931333	1.313			0.00577648	up
Q6Z411	Os07g0558400	Chlorophyll a-b binding protein, LHCB	response to stimulus;photosystem I	NNAGEIIGT(ph)RFET(ph)GEVK	111 115	0.977333	1.15667	1.27867			0.0155289	up
Q6ZFJ3	Os02g0103800	Ferredoxin--NADP reductase,OsLFNR2	stress-related ; oxidoreductase activity	LVYT(ph)NDQGEIVK	173	1.10433	1.29033	1.56767			0.0167055	up
				QVDGVVT(ph)NK	81
Q7F8S5	Os02g0192700	Peroxiredoxin-2E-2, chloroplastic,PRXIIE	antioxidant activity, acting on peroxide as accept	AVLFAVPGAFTPT(ph)CSQK	110	1.00967	1.06067	1.241			0.0121301	up
Q69SV0	Os02g0553200	Probable L-ascorbate peroxidase 8, response to oxidative stress,metal binding,OsAPx8	antioxidant activity, acting on peroxide as accept; response to stimulus; platid membrane	KELSDS(ph)MK	434	0.807	0.501	0.440333	0.0442607	down	0.0262459	down
A0A0P0XQ33	Os09g0500200	NADH dehydrogenase [ubiquinone] 1 alpha subcomplex subunit 12	stress-related ;electron carrier activity; oxidoreductase activity ,actin on NAD(P)H	SKDGT(ph)DTEDATIDTDR	149	1.05467	1.00933	1.42067			0.0123472	up
Q5KQI2	Os05g0481600	Uncharacterized protein-NADH dehydrogenase (ubiquinone) flavoprotein 1	stress-related	VLLHQAS(ph)SENN	62	1.03833	0.977667	1.25333			0.028813	up
Q10A81	Os03g0862100	oxidoreductase/ transition metal ion binding protein, putative	stress-related	ADSSPSPDAFAGWS(ph)DGDEQDEQDK	56	0.948667	0.827333	1.186			0.0065348	up
Q6ZG50	Os08g0476300	oxidoreductase, short chain dehydrogenase/reductase family domain containing protein, expressed	stress-related	SVS(ph)GSNSSR	6	0.938	0.971667	0.553			0.0217245	down
Q9LGR1	Os01g0184800	phosducin-like protein 3(Thioredoxin fold domain containing protein), putative, expressed		VVAQHEEREEDDDS(ph)D	250	1.183	1.371	1.83267			0.022817	up
Q7Y0D4	Os03g0767500	Thioredoxin-like protein HCF164, chloroplastic	stress-related ; cell redox homeostatic process;oxidoreductase activity,acting on sulf ur group of donors; response to stimulus; sulfur compound metabolic process	VVGQFSSAES(ph)R	249	0.889667	0.641667	0.731667	0.0416864	down
Q8LQM2	Os01g0785700	Drought-inducible protein 1OS	stress-related	NKEESIS(ph)EEEEEPENA	425	0.927667	0.946667	1.157			0.0261759	up
Q5VQ75	Os06g0144000	DNA repair protein XRCC1-like		ELVES(ph)DEDQK	153	0.962667	0.845333	1.163			0.0261023	up
Q5Z6P9	Os06g0264300	RAD23 DNA repair protein, putative, expressed	response to stimulus	APVSQS(ph)QPAT(ph)PVASVAR	95 99	0.951	1.06733	1.25233			0.00759175	up
Q7XQR9	Os04g0635900	Double-strand break repair protein MRE11	DNA repair exonuclease MRE11; response to stimulus	SVTAQSNLNSFS(ph)DDEDTR	539	1.01833	0.944	1.26333			0.00926623	up
Q5N6Y9	Os01g0901200	Similar to RecA protein	DNA repair protein RAD51/RHP55; response to stimulus	SSGTDS(ph)GEENLSK	57	0.949	0.898	1.269			0.00269381	up
Q10MD7	Os03g0312600	ATP binding protein, putative	GTPase XAB1, interacts with DNA repair protein XPA	SEELADSIGSLS(ph)IGPER	41	0.963667	0.921667	1.31967			0.0276529	up
Q6EUN0	Os02g0581300	ASC1-like protein 1	stress-related ;endoplasmic reticulum membrane	NVGDDVRS(ph)DS(ph)EGEDEHED	299 301	0.993667	1.04067	1.413			2.65e-06	up
Q84QC0	Os03g0264000	ASC1-like protein 3	at stress-related ,endoplasmic rericulum membrane	GQVGEDVRS(ph)DS(ph)EDEE	278 280	0.986	1.21967	1.21533			0.0399759	up
Q8H7S7	Os03g0224200	two-component response regulator ARR-B family	stress-related ; signaling; response to hormone	EHEHS(ph)GS(ph)LDDTDR	145 147	0.921667	1.00367	1.125			0.0296479	up
A0A0P0WJ59	Os05g0196100	Multidrug resistance associated protein 14, MRP14	stress-related ;active transmembrane transporter	ELGAFQYQVPLIQQNS(ph)EAEIS(ph)TGNLK	888 893	1.117	1.143	1.57133			0.0163578	up
Q60EJ0	Os05g0501700	universal stress protein domain containing protein, putative, expressed	stress-related ; response to stimulus	AT(ph)PPST(ph)PPPVR	16 20	1.01767	1.03033	1.22667			0.0246688	up
				LAGGAAAAIQPNS(ph)PR	38
Q53JF7	Os11g06720	ABA/WDS induced protein(abscisic acid-stress-ripening-inducible 5 protein), expressed, ASR5	stress-related ;response to stimulus	S(ph)AEESTGEK	124	1.08033	1.00833	0.858667			0.0475744	down
Q6K5Q1	Os02g0491400	FKBPs,rFKBP75	stress-related ,endoplasmic reculum membrane	LEDS(ph)ETEGGTTQAPSK	610	0.986	0.945667	1.25833			0.00226739	up
C7J464	Os06g0291800	cadmium tolerance factor	stress-related ; signaling; response to stimulus	DDGQMADEAADIES(ph)QQDSK	55	0.997333	1.01067	1.551			0.000843797	up
				SLAS(ph)PGQSK	947
				GRIS(ph)GDS(ph)EKNPDDVR	598 601
A3BAV3	Os06g0292400	cadmium tolerance factor, putative, expressed	stress-related	NERS(ph)PNEDGNR	669	1.032	0.749333	0.850667	0.0054847	down
Q6L4W5	Os05g0509400	tesmin/TSO1-like CXC domain containing protein, expressed	Metallothionein-like protein, stress related	LQS(ph)PIS(ph)K	247 250	1.018	0.507333	0.517	0.000335165	down	0.000787971	down
Q7XK44	Os04g0476700	Plant intracellular Ras-group-related LRR protein 3,IRL3	stress-related	SIAAAES(ph)PQAPTT(ph)PSAWLAR	401 407	1.003	0.915333	1.32867			0.0108795	up
Q6L4S3	Os05g0591900	hypersensitive-induced response protein, putative, expressed	stress-related	DGLLQGQATTTS(ph)H	287	0.966667	0.928333	1.16833			0.0149272	up
Q5JLH8	Os01g0534900	early-responsive to dehydration protein-related, putative, OsIOSCA1.1	stress-related	ES(ph)PSHGGAFVR	50	1.10733	0.897667	0.748667			0.0144518	down
Q5TKG1	Os05g0594700	early-responsive to dehydration protein-related, putative, expressed, SCA1.2 OsIOSCA1.1	stress-related	YEGS(ph)DTLS(ph)LPETVHER	754 758	0.988	1.05233	1.214			0.0023942	up
				RNT(ph)PAQSK	745
Q6K9M2	Os02g0791800	atATG18b, putative, expressed	response to stimulus/starvation; phospholipid binding; vacuole organization	ELNLLDTGCST(ph)PQR	365	0.972	1.02967	1.19533			0.0155572	up
Q0DPL9	Os03g0681300	Similar to SABRE	Antagonistically interacts with ethylene signaling to regulate plant responses to Pi starvation. stress related	NTGLTLQDS(ph)LPS(ph)SPR	38 41	0.945333	1.15333	1.372	0.0221697	up	0.0312885	up
Q7X745	Os04g38630	ATP-dependent RNA helicase SUV3L, mitochondrial	stress-related ,Confers salinity and drought stress tolerances by maintaining both photosynthesis and antioxidant machinery; signaling; response to hormone	RENEEDNDVEQAS(ph)DDNAK	693	0.868333	0.837667	1.44067			0.0068792	up
B7E4J4	Os05g0382600	annexin, putative, OsANN3,expressed	stress-related ;phospholipid binding	AFS(ph)GLGGLGVDEPAMVSALAK	13	0.980333	0.749333	0.500333			0.0158659	down
Q2QZU5	Os11g0671000	auxin-repressed protein, putative	stress-related	RTQS(ph)MPTTPTTPVTPSSSS(ph)PT(ph)TTATTTPR	51 66 68	1.06133	1.155	1.392			0.00389162	up
P09229	Os01g0803200	cysteine proteinase inhibitor precursor protein, putative, expressed	stress-related ;at extracelluar region; response to stimulus; defense response	ELQEFKPVDAS(ph)ANA	137	1.05367	1.06	1.28867			0.00199164	up
Q7XI96	Os07g0580500	Protein BRASSINAZOLE-RESISTANT 1 homolog 1,OsBZR1	stress-related ; growth process; signaling; response to hormone	HPFFAVS(ph)APAS(ph)PTR	192 196	0.980667	0.863	1.20267			0.00557821	up
B9FR93	Os06g0123200	Brown planthopper resistance-32	stress-related	QINVTIT(ph)ANNT(ph)SK	50 54	0.940667	0.899667	1.13233			0.019364	up
Q68Y36	Os05g0515900	heat- and acid-stable phosphoprotein, putative, expressed	stress-related	SQES(ph)DEEESDNFQK	60	0.990667	1.20033	1.47133	0.0494298	up	0.00400164	up
Q5JMX3	Os01g0752800	heat- and acid-stable phosphoprotein, putative, expressed. Similar to HASP protein-like protein (Fragment)	stress related, Phosphoprotein/predicted coiled-coil protein	EEEEDDIEES(ph)EEEES(ph)EDESEGK	52 57	1.168	1.214	2.08667			0.00776256	up
Q9MBF2	Os08g0539700	resistance protein, putative, expressed,PibH8	stress-related	DSNTVS(ph)VK	421	0.959667	1.17633	1.206	0.0486496	up
				STT(ph)QLIGR	430
Q84ZN6	Os07g0208500	Probable cellulose synthase A catalytic subunit 8,CESA8	cell wall ;celluar carbohydrate biosynthetica process	GEEGEDTDADDVS(ph)DYNYPASGSADQK	91	1.14233	0.858333	1.131	0.030003	down
Q5ZCG4	Os01g0779400	alkaline tolerant;Snf2 Family Chromatin Remodeling ATPase	regulation of cell death	QSSPDS(ph)DDEEK	675	0.964	0.967333	1.33167			0.0372361	up
Q67V39	Os06g0634600	UBA and UBX domain-containing protein, putative, expressed	stress-related ;Golgi organization	DSAGSEDS(ph)EDDEYKPPQELYTGGEK		1.11333	1.05333	1.393			0.0140341	up
Q6YVY6	Os07g0602900	Ninja-family protein	stress-related ; signaling; response to stimulus	TSS(ph)LPTETEEER	97	0.988667	0.934667	1.336			0.0126527	up
A0A0P0W2T4	Os03g0738900	NPH3 domain containing protein	stress-related	STATQDS(ph)QVLR	562	1.09267	1.13767	1.57167			0.0183498	up
Q2QQS1	Os12g0485800	prefoldin subunit, putative	stress-related	KADS(ph)DTQEEGSMK	123	0.94	1.134	1.55767			0.00843269	up
Q0JJ01	Os01g0767900	regulatory protein NPR1,OsNPR2	stress-related	ADNSMFSILSSSSSSS(ph)PPPK	627	1.046	1.038	1.47467			0.00892253	up
Q7EZ93	Os08g0517300	ZOS8-11 - C2H2 zinc finger protein, expressed	stress-related	AS(ph)AS(ph)PPPASASTGGDR	8 10	1.061	1.058	1.516			0.00436806	up
Q5KS50	Os02g0568200	Coleoptile phototropism protein 1,CPT1	stress-related	GLVPVGGGGGS(ph)GR	24	1.125	1.05333	0.684			0.00643604	down
Q5WA73	Os06g0163300	harpin-induced protein, putative, expressed	stress-related	WNVGGGGGGES(ph)KESS(ph)PSR	254 258	1.12567	0.586667	0.516333	0.00545675	down	0.00338726	down
Q0DK70	Os05g0188100	expressed protein	stress-related	S(ph)AASAAAADSSSNKKS(ph)GDDE	70 85	1.03167	1.27367	1.58933			0.0041347	up
Q337E2	Os10g0505900	response to stress	stress-related	ASGSSS(ph)S(ph)S(ph)EEGEDDVAAQR	81 82 83	1.00367	1.043	1.46267			0.0286079	up
Q10L71	Os03g0356700	VILLIN2	stress-related ,cytoskeletal binding protein	S(ph)SDGGPTQR	787	1.182	0.822667	0.694	0.0343088	down	0.00650106	down
Q10EK0	Os03g0767600	BTB domain containing protein	stress-related	TIMANEGGAAGQGEEEGDS(ph)DAGGTWR	580	1.048	1.109	1.82567			0.0378211	up
epigenetic motification
Q6Z4S6	Os07g0122400	tetratricopeptide repeat containing protein, putative, expressed	Cell cycle-regulated histone H1-binding protein	DPPPS(ph)PPNPSEEAGAGEEMEAEGEGEEEVK	21	1.064	1.11633	1.32367			0.00433125	up
				GQEEENGDS(ph)DKDDDEMVGDEDDSDLDQAWK	175
Q0JRB9	Os01g0109700	chromatin,histone deacetylase complex	Histone deacetylase complex, SIN3 component	EEGELS(ph)PNGDFEEDNFAPFEDGAVDGVSK	847	0.979	0.971	1.273			0.00708047	up
				AES(ph)EGEAEGTTETHDVEGGISLPLSER	988
				VQGAS(ph)PGTNEIPAVSTQNMPTER	758
Q69IM3	Os09g0515100	bromodomain protein 103, putative, expressed	AAA+-type ATPase containing the bromodomain;histone binding	LHPYQES(ph)EDDQES(ph)S(ph)EEQPAQDR	158 164 165	1.097	1.089	1.44267			0.0203916	up
Q5ZEM9	Os01g0121100	Protein-lysine N-methyltransferase		MVTGGGGGGAGGGPPGPPGEMAS(ph)DDDR	40	0.987	1.04	1.52467			0.00504404	up
				SVAADS(ph)WS(ph)IK	50 52
transporters
Q8H5N9	Os07g0448800	Probable aquaporin PIP2-1	stress-related ; at vacuole; carbohydrate passive transmembrane transporter; homeostatic process	DEVMES(ph)GGAAGEFAAK	9	1.07033	1.37933	0.700333			0.00356341	down
				ALGS(ph)FRS(ph)NA	288
Q7XLR1	Os04g0233400	Probable aquaporin PIP2-6	stress-related ; at vacuole; carbohydrate passive transmembrane transporter; homeostatic process	ALGS(ph)FRS(ph)NPS(ph)N	275 278 281	1.04233	1.195	0.531333			0.000263819	down
Q651D5	Os09g0541000	Probable aquaporin PIP2-7	Aquaporin (major intrinsic protein family)specific carbohydrate transport;homeostatic process;passive transmembrane transporter	ALSS(ph)FRS(ph)TSVTA	282 285	0.999	1.86667	1.05067	0.00303871	up
Q9ARU4	Os01g0121700	half-size adenosine triphosphate-binding cassette transporter subgroup G(ABC transporter)	active Transmembrane transporter	VAITESNS(ph)SLTNPEGSEFS(ph)PK	350 361	0.978333	0.968333	1.18633			0.00215174	up
				AVAGPGPALLPPADDEDS(ph)DADPEAGGEGGGVPPVTIR	38
Q5Z9S8	Os06g0554800	ABC transporter G family member 42,ABCG42	active Transmembrane transporter	LMS(ph)IGS(ph)NEAGPR	873 876	0.978333	0.788333	0.676667			0.00118618	down
Q10RJ4	Os03g06139	ABC-2 type transporter domain containing protein, expressed	active Transmembrane transporter	TASAETVLSTADVTT(ph)TTSLSR	54	1.10033	1.12233	1.43633			0.0160803	up
Q75HT8	Os05g0222200	ATPase activity, coupled to transmembrane movement of substances,ABC transporters in lipid homeostasis	active Transmembrane transporter	TLAMSSMS(ph)KR	678	1.063	0.77	0.681667	0.0277939	down	0.00574905	down
Q8H9E4	Os07g0476200	tetratricopeptide repeat domain containing protein, expressed	TPR-containing nuclear phosphoprotein that regulates K(+) uptake	AWS(ph)ESEDDEPVQRPVQPSAGENDLS(ph)D	1046 1068	1.03267	1.12133	1.333			0.00999562	up
Q69RI8	Os07g0509200	HAK14:Probable potassium transporter 14	at vacuole; celluar potassium ion transport	GGCS(ph)DS(ph)DDNYEEAEMLR	65 67	1.017	1.158	1.672			0.000787008	up
Q7XPL3	Os04g0610700	HAK15,Probable potassium transporter 15	Transmembrane transporter; at vacuole; celluar potassium ion transport	GGS(ph)FGS(ph)EEEEDEEDGGGGGEGEGEGEDGEK	60 63	1.04367	1.17	1.747			0.00349662	up
				EAVELSLQS(ph)GDDIDS(ph)DEEPPTPSR	733 739
Q6YWQ4	Os02g0730300	Potassium transporter 25,HAK25	Transmembrane transporter; celluar potassium ion transport	ETDTQIIS(ph)PNR	678	1.02	0.93	1.272			0.0129148	up
Q0DUA4	Os03g0197200	transporter family protein, putative, expressed	carbohydrate activeTransmembrane transporter	EDGHGQNKS(ph)TELTTQQ	288	1.197	1.04167	4.85767			6.2e-06	up
Q6ZFM7	Os07g0582400	transporter family protein, putative, expressed	specific carbohydrate active transmembrane transport;cation/sugar symporter	LFGDTAAAS(ph)ES(ph)DEPAKEK	492 494	0.907	0.732667	2.018			0.000328752	up
Q6EQ14	Os09g0416200	transporter family protein, putative, expressed	carbohydrate active Transmembrane transporter	VMPDLPLEDGDS(ph)HHK	508	0.996333	0.952	1.22733			0.000676979	up
Q5ICN3	Os12g0641100	Na+/H+ antiporter	active Transmembrane transporter	AIEEDEDNS(ph)S(ph)DES(ph)AGEEVIVR	1118 1119 1122	1.03367	1.03867	1.30167			0.0116407	up
Q2R0E9	Os11g0648000	transporter, monovalent cation:proton antiporter-2 family, putative	Sodium/hydrogen exchanger protein; active transmembrane transporter activity; homeostatic process	GFVPFVPGS(ph)PTER	531	1.026	1.08767	1.30967			0.00434161	up
				ESSALS(ph)DPPS(ph)PK	459 463
Q5QNI2	Os01g0212400	sodium/calcium exchanger protein, putative, expressed	homeostatic process;specific secondary active transmembrane transporter activity	SVPTSGAYS(ph)NK	392	0.977333	0.627333	0.609667	0.0195845	down	0.0153792	down
Q2QM48	Os12g0617800	Cation/H+ exchanger domain containing protein	specific secondary active transmembrane transporter activity	YCLLEAS(ph)DDESEASNSSK	773	1.062	1.306	1.574	0.00267853	up	0.00105633	up
Q5VPM1	Os06g0581000	peptide transporter PTR2, putative, expressed	H+/oligopeptide symporter	APS(ph)PTGS(ph)TDMK	285 289	0.931667	0.885333	1.157			0.0161301	up
Q6H536	Os02g0229400	monosaccharide transporter	specific carbohydrate active transmembrane transport;cation/sugar symporter	GS(ph)ALS(ph)MR	395 398	0.996	0.810333	1.21767			0.0135296	up
				DDEEYAS(ph)DGAGGDYEDNVHSPLLS(ph)R	359 372
				QTT(ph)SAEGK	380
				IYLHQEEVPGS(ph)R	454
Q8RZQ8	Os01g0881300	Bidirectional sugar transporter SWEET1a	specific carbohydrate transmembrane transport	VVADDADADADGKS(ph)ADDK	264	1.02833	0.710333	0.548	0.00346799	down	0.000143773	down
A0A0P0Y9R2	Os12g0438600	chloride transporter, chloride channel family, putative, expressed	passive transmembrane transporter	S(ph)NT(ph)LTASHLAMVGAK	49 53	0.866333	0.894667	1.173			0.0404328	up
Q0J0H9	Os09g0508300	S-acyltransferase,zinc finger DHHC domain-containing protein		NTHPPEPESIDGGSDMGNGQ(ph)TPQQLR	130	0.882333	1.074	1.42367			0.0498509	up
Q5I396	Os05g0196800	O-acyltransferase	Sterol O-acyltransferase/Diacylglycerol O-acyltransferase; endoplasmic reticulum membrane	ASFGGDS(ph)GDEAASGEPSSSSSSSPSR	66	0.991333	0.939667	1.42567			0.0200458	up
Q7XDA3	Os10g34350	Aminotransferase, classes I and II family protein, expressed	Kynurenine aminotransferase, glutamine transaminase K; transferring nitrogenous group	LLRPTDDGEAGQTASATS(ph)P	411	0.939667	0.903	1.143			0.0125022	up
Q9FNZ8	Os06g0275800	amino acid transporter, putative, expressed		LPEGS(ph)SEPLLPTK	13	1.029	0.931	1.268			0.0410759	up
Q9SNN8	Os06g0130400	substandard starch grain6; protein homologous to aminotransferase; aminocyclopropane-1-carboxylate synthase gene,OsACS6; SSG6	Transmembrane transporter	ASPPPPPGS(ph)PTAASAAAVS(ph)PIHR	79 89	1.06167	1.05833	1.44567			0.00031392	up
Q688J5	Os05g0446800	arginyl-tRNA--protein transferase 1, putative, expressed		FLDGELDPQVGS(ph)PQNK	125	1.00933	0.980667	1.33667			0.0128653	up
A0A0P0VUJ4	Os03g0210800	nucleotidyltransferase		GGSSHS(ph)S(phh)PDQPSSPQTR	785 786	0.965333	1.12233	1.41867			0.0148762	up
Q6K700	Os02g0821900	expressed protein	Uncharacterized membrane protein, predicted efflux pump	ELSGQDAVS(ph)AEGDDEK	95	1.044	1.137	1.43767			0.0193092	up
Q2QPW9	Os12g0514900	mitochondrial import inner membrane translocase subunit Tim17	passive transmembrane transporter	RKEEGEEDGFS(phh)SDGGDT(ph)TDAES(phh)SDER	21 27 32	0.966667	0.879333	1.233			0.0120676	up
Q5JJI4	Os01g0921600	Probable mitochondrial import receptor subunit TOM20	localyzation to mitochondrial membrane part; protein import	QMASQAS(ph)QAASSTSNTR	150	1.05533	1.09367	1.569			0.0138142	up
Q6H657	Os02g0644500	expressed protein	Phosphoprotein involved in cytoplasm to vacuole targeting and autophagy	FSGVFSSSGS(ph)PR	406	1.06533	1.11067	1.369			0.0195442	up
Q7XX94	Os04g0195000	WD domain, G-beta repeat domain containing protein, expressed, protein targeting to vacuole	Vacuolar assembly/sorting protein VPS41	SNSSTQDS(ph)DEDDEGTPSGESR	925	0.920333	3.091	5.98133	0.00250206	up	1.8e-05	up
Q0JAK9	Os04g0592400	protein transport protein-related, putative, expressed	cell devision	EESNVKGDS(ph)EDDEPVMVVAK	674	1.07167	0.700333	0.605333	0.0236538	down	0.00275329	down
				VTDDAS(ph)S(ph)KEK	97 98
Q0DXR0	Os02g0738900	brittle culm 3; dynamin-related protein 2B,BC3; OsDRP2B	Transmembrane transporter	ASVASYTNDSSGAESS(ph)PR		1.03767	0.723	0.742333	0.0424206	down	0.0478026	down
				QLS(ph)IHDNR	830
Q6ZD92	Os08g0157100	ELF7, putative, expressed	Transmembrane transporter	VEDMDQYS(ph)GDEYS(ph)D	445 450	1.06067	1.15633	1.56733			0.000987454	up
Q6ATX4	Os05g0470800	outer membrane protein, OMP85 family protein, expressed	Transmembrane transporter	LVPSESEDGSAAS(ph)PGR	412	1.07633	1.056	1.444			0.00541674	up
Q8H5M0	Os07g0585000	C2 calcium-dependent membrane targeting domain containing protein	Transmembrane transporter	TVQSSAS(ph)PAANS(ph)PGAMSESAVDKPPVIR	329 334	1.001	0.956667	1.351			0.00359818	up
				AAS(ph)DAADAEVESSR	311
Q658H5	Os06g0129400	SPX domain-containing membrane protein	Predicted transporter/transmembrane protein	KDEDDDEEVDDS(ph)EEGTHDSR	485	0.921	0.882667	1.27467			0.0125727	up
				KPATSIGS(ph)AYR
Q0DL73	Os05g0119700	protein transport protein-related, putative, expressed		VAMS(ph)PTKPQQQQK	72	1.096	0.600333	0.462667	0.00746846	down	0.00192192	down
Q6EP35	Os02g0580900	Putative RCH2 protein	Transmembrane transporter	AAIMEADLAAS(ph)PAK	313	0.982667	1.01967	1.26667			0.000360297	up
Q94GF4	Os03g61150	Expressed protein	Transmembrane transporter	VEGFFPHDDAAAAES(ph)PSK	98	1.16367	1.12767	1.47867			0.0413491	up
A0A0P0X6Z4	Os07g0520900	Patatin-related phospholipase A,OspPLAI	Transmembrane transporter	SS(ph)PPTS(ph)PLK	1072 1076	1.00367	0.798333	0.692			0.0220782	down
carbohydrate metabolic process
Q2QS14	Os12g0443500	UDP-glucose 6-dehydrogenase 4 ,UGD4	oxidoreductase activity	FDWDHPMHLQPTS(ph)PTAFK	393	1.18067	0.786	0.824	0.0149376	down	0.0179446	down
Q2QS13	Os12g0443600	UDP-glucose 6-dehydrogenase 5 ,UGD5	oxidoreductase activity	HLQPTS(ph)PTAFK	393	1.17367	0.683	0.615667	0.00674151	down	0.00359839	down
Q0JGK4	Os01g0919400	Probable sucrose-phosphate synthase 1,SPS1	Glycosyltransferase; celluar carbohydrate biothesis process	NFS(ph)ELTVSWSDENK	197	0.978	1.05367	1.26133			0.000346387	up
				S(ph)PAAGAAS(ph)PR	50 57
				DFEIAS(ph)PR	482
				LS(ph)IDGER	732
Q67WN8	Os06g0643800	Probable sucrose-phosphate synthase 3,SPS3	celluar carbohydrate biosynthetica process	GEDAGDPSVAYGDSTTGNT(ph)PR	161	1.13567	1.21433	2.018			0.00406402	up
Q6ZHZ1	Os08g0301500	Probable sucrose-phosphate synthase 4,SPS4	Transmembrane transporter;celluar caibohydrate biothesis process	YAAADMS(ph)EDLS(ph)EGEK	138 142	1.04667	1.028	1.418			0.00718196	up
				KTES(ph)VENMEATTGNK	761
				LS(ph)LDS(ph)EK	725 728
				SDDATEVS(ph)EADS(ph)PGDS(ph)LR	700 707 711
Q6Z0T2	Os08g0556000	ECT5, putative, expressed	Uncharacterized high-glucose-regulated protein	NVS(ph)PNSADK	597	1.09833	0.861333	1.109	0.0238433	down
Q10CW7	Os03g0748000	YT521-B-like family domain containing protein	Uncharacterized high-glucose-regulated protein	KPAGMPYGSASAGDAQNAAS(ph)PVDR	54	0.997	1.038	1.225			0.000656449	up
				QQLLQGQGS(ph)LDNASHEK	610
Q94EF2	Os01g0770000	wax synthase, putative, expressed	Transmembrane transporter	GAAAAT(ph)PPEPVS(ph)PSAR	46 52	1.056	1.04467	1.33067			0.00891829	up
Q5Z4M6	Os06g0308000	peptidyl-prolyl cis-trans isomerase, FKBP-type, putative, expressed		AENLQFST(ph)EQLVK	483	1.03267	1.22967	1.52967			0.000979285	up
Q2QP63	Os12g35560	Galactose oxidase/kelch, beta-propeller domain containing protein		DAES(ph)DDS(ph)SSGSNQRPADK	506 509	0.998667	0.753333	0.944667	0.0276466	down
Q7XRN9	Os04g0131900	sterol 3-beta-glucosyltransferase, putative, expressed	UDP-glucuronosyl and UDP-glucosyl transferase	S(ph)STMPGGINNVEITNETAGPSNLER	53	0.962333	0.912667	1.30533			0.0225697	up
Q6ZBR2	Os08g0489100	cytokinin-O-glucosyltransferase, putative, expressed	UDP-glucuronosyl and UDP-glucosyl transferase	ELETACMS(ph)PSFG	459	1.03933	1.01967	1.38167			0.000326719	up
Q8H4V1	Os08g0366000	phosphoenolpyruvate carboxylase, putative, expressed	carbon fixation;at extracelluar region; tricarboxylic acid cycle; energe derivation by oxidation of organic compound	MAS(ph)IDAQLR	10	1.085	1.37533	1.56267	0.00440647	up	0.00170415	up
P18566	Os12g0291100	Ribulose bisphosphate carboxylase small chain A,RBCS-A	carbon fixation; oxidoreductase activity; monooxyenase activity; photosynthesis	LPMFGCT(ph)DAT(ph)QVLK	124 127	1.04167	1.43967	1.27333	0.00717663	up	0.00782083	up
				S(ph)PGYYDGR	104
				WVPCLEFS(ph)K	92
Q5JN42	Os01g0959800	PSD2:Phosphatidylserine decarboxylase proenzyme 2	vacuole; endoplasmic reticulum membrane	HNACGGGGGDGES(ph)PPSPLPSR	20	0.982	0.961	1.24933			0.0494009	up
Q5N725	Os01g0905800	Fructose-bisphosphate aldolase,FBA3	energe; glycolytic process	FAS(ph)INVENVEENR	42	0.981	0.969667	1.17733			0.0104451	up
Q5QMK7	Os01g0817700	2,3-bisphosphoglycerate-independent phosphoglycerate mutase, putative, expressed	Phosphoglycerate mutase	AHGTAVGLPSEDDMGNS(ph)EVGHNALGAGR	81	1.04667	1.07433	1.59067			0.000109512	up
Q0J8A4	Os08g0126300	glyceraldehyde 3-phosphate dehydrogenase	oxidoreductase activity; glycolytic process	AAS(ph)FNIIPSSTGAAK	205	1.02933	1.01	1.29767			0.0080756	up
				AAS(ph)YDAIK	256
				LTGMS(ph)FR	234
Q654V6	Os06g0246500	pyruvate dehydrogenase E1 component alpha subunit	mitochondrial matrix; oxidoreductase activity; glycolytic process	YHGHS(ph)MSDPGSTYR	301	1.24533	1.38967	1.712			0.041154	up
Q2QXY9	Os12g0138900	2-isopropylmalate synthase B	Alpha-isopropylmalate synthase/homocitrate synthase; celluar amino acid metabolic process	ASSEVSES(ph)QR	628	1.01433	1.03	1.386			0.0210167	up
Q651A9	Os09g0571500	lipase, putative, expressed		NTSSMGTAS(ph)S(ph)GEEEEDDEGK	54 55	1.191	1.336	1.80667			0.0246338	up
other proteins
Q6ZBH4	Os08g0545000	expressed protein	Molybdenum cofactor sulfurase	NVPEMDAAGEENGHS(ph)PEIR	463	1.013	1.00767	1.41933			0.000800417	up
A0A0P0VL78	Os02g0596100	EMB1745;GLE1-like domain containing protein	nuclear envelope ; nitrogen compound transport	VEEEDDT(ph)DEDDYDS(ph)DGESR	93 100	1.004	1.00767	1.56567			0.00124823	up
				FSCNDLESSDAEES(ph)EDEMDGR	129
Q6I5K0	Os05g0465100	TBC domain containing protein, expressed	Ypt/Rab GTPase activating protein	LDVLEESMGS(ph)PK	789	1.179	0.931667	0.795667			0.0427864	down
				ALLS(ph)PLPS(ph)PR	699 703
Q69IL7	Os09g0515800	Os09g0515800 protein	Ypt/Rab-specific GTPase-activating protein GYP1	SEPLS(ph)PPEYS(ph)PR	53 58	0.965333	1.12167	1.294			0.000547549	up
Q5N770	Os01g0813900	GTPase-activating protein, putative, expressed		TGSSGSFGS(ph)FDGSSASNK	289	0.974667	0.956333	1.513			0.00771182	up
A0A0P0X1R2	Os07g0110200	nucleolar GTP-binding protein 1, putative, expressed		AAS(ph)DGDDMDIDGQQSSK	259	1.06167	1.07567	1.46867			0.00514485	up
A0A0P0WQU7	Os05g0563050	GTP binding protein, putative, expressed		GEAT(ph)ES(ph)VHDMDIDDDNTGR	392 394	1.051	1.007	1.408			0.02365	up
Q851Q6	Os03g0799700	spo0B-associated GTP-binding protein, putative, expressed,OBGC2	Predicted GTP-binding protein (ODN superfamily)	GGNVGAT(ph)GT(ph)LSSR	175 177	1.00933	1.06567	1.31133			0.0282374	up
Q0D519	Os07g0588200	Formin-like protein 13, FH13	Rho GTPase effector BNI1 and related formins	SEGFDS(ph)DQSAVNPGSGSK	585	1.023	1.02367	1.39833			0.0021364	up
Q10N88	Os03g0278400	ARF GAP-like zinc finger-containing protein ZIGA2, putative, expressed	ADP-ribosylation factor GTPase activator	SKS(ph)TQDMYTR	193	0.992	0.741333	0.936	0.0319819	down
				RNQS(ph)VGSFGESGAESGR	173
Q84Z87	Os08g0518100	Ypt/Rab-specific GTPase-activating protein GYP6	at vacuole; response to stimulus/starvation	TIQDSEAASSDKS(ph)PDR	690	1.007	0.904667	1.28133			0.000557948	up
Q6YZI5	Os08g0558900	expressed protein	ATPase reulater activity	GNPAASDKNTEGGS(ph)N	88	1.03367	1.03033	1.73667			0.0193382	up
Q7XN85	Os04g0658300	AA-type ATPase family protein, putative, expressed;Similar to Ribulose bisphosphate carboxylase/oxygenase activase, chloroplast precursor (RuBisCO activase) (RA).	26S proteasome regulatory complex, ATPase RPT4	QSS(ph)WEAK	78	0.855	0.531	0.465333	0.0172135	down	0.00718274	down
Q5Z9Q8	Os06g0714500	AAA-type ATPase family protein, putative, expressed				0.991333	1.045	1.25833			0.00512393	up
Q0DSY0	Os03g0281600	Similar to Ca2+-ATPase	active Ca2+ transporting ATPase; endolasmic reticulum	RDGS(ph)DAS(ph)GSEPAAAAFPAWAR	15 18	1.00367	1.05267	1.33967			0.0193729	up
Q6ZD98	Os08g0156700	MSP domain containing protein, expressed	VAMP-associated protein involved in inositol metabolism ; endoplasmic reticulum membrane	VTYIAPPQPPS(ph)PVPEES(ph)EEGS(ph)PSR	139 145 149	1.05933	1.00833	1.37433			0.0108691	up
Q5ZDH9	Os01g0139200	PB1 domain containing protein, expressed		GGDS(ph)WDEPFPSSAAAAAAAAGGGR	35	1.01633	1.06067	1.55033			0.00132823	up
				IAATSS(ph)GGGSSR	148
				GGPPNSS(ph)PAEEQR	235
				NSSFGS(ph)TSSAPSLSNLPPIR	279
				VFS(ph)DDDKS(ph)DHGGGGGR	360 365
				AMYYNDRS(ph)PPAELK	399
				HPHDVQS(ph)VPDS(ph)PMIDK	264 268
Q7XXQ8	Os06g0232000	pro-resilin precursor, putative, expressed		KHDDNDS(ph)DDEK	360	1.02267	1.00467	1.316			0.0132756	up
				KTEEESYGGGS(ph)GYGYGK	284
				KPQQEESYGS(ph)EYGSGYGR	221
Q2QNB0	Os12g0572400	SR repressor protein, putative, expressed		DDYS(ph)AS(ph)PPR	175 177	0.994667	1.04167	1.34433			0.00303101	up
				S(ph)RS(ph)YS(ph)PAPR	163 165 167
				S(ph)ADVS(ph)PARS(ph)D	254 258 262
				S(ph)PPPDS(ph)DGS(ph)PPHR	225 230 233
				RYS(ph)PPYRS(ph)PPR	5 10
Q5JN45	Os01g0959000	transposon protein, putative, CACTA, En/Spm sub-class, expressed		KGRS(ph)PS(ph)PPPPK	85 87	1.00233	1.05433	1.206			0.0190406	up
				RRS(ph)PS(ph)PPPR	246 248
				S(ph)RS(ph)PPAAK	51 53
				RHS(ph)RS(ph)PPPR	353 355
				RQPDPS(ph)PR	255
				RRS(ph)PMRPS(ph)PR	303 308
				RADAS(ph)PVR	272
				GRS(ph)PSS(ph)PAK	69 72
				LRGS(ph)PS(ph)PR	315 317
A0A0N7KMU9	Os07g0118300	expressed protein		GAASASGGGGAAPEAQQQLSGGGDT(ph)PRR	28	1.00667	0.915	1.312			0.0181775	up
Q84L14	Os02g0612300	Nuclear cap-binding protein subunit 2,CBP20	Nuclear cap-binding protein complex, subunit CBP20 (RRM superfamily)	GDS(ph)DEEDDDYDKR	230	0.973333	1.04067	1.45933			0.000851013	up
Q69V56	Os06g0608800	copine-1, putative, expressed		SSS(ph)FGPQTSGFQQSES(ph)FKQR	364 377	1.04233	1.11967	1.41233			0.000608334	up
				STSFDQHSGVYS(ph)R	360
				YPAYPANASSS(ph)QNTR	39
				SSS(ph)FGPQTSGFQQSES(ph)FK	377 390
Q6YSF3	Os07g0607800	Acidic leucine-rich nuclear phosphoprotein 32-related protein		DDDPS(ph)GS(ph)GDDDEDDDGVEDLRPFK	455 457	1.01867	1.07733	1.46233			0.00180996	up
				AVEAALQAAGEGSSS(ph)PAR	22
Q33B10	Os10g0151800	RNA recognition motif containing protein, expressed	Heterogeneous nuclear ribonucleoprotein R (RRM superfamily)	REDS(ph)DDPEEEDPDER	37	1.08767	1.13233	1.62567			0.0293969	up
				QQS(ph)EEPEEQVDLEGDDDIMDDDDGYR	7
Q6ZKE8	Os08g0178300	BUD13, putative, expressed		RQDT(ph)PS(ph)PK	182 184	1.02567	0.992667	1.24867			0.0113312	up
				ESQDIS(ph)PPR	227
				QDT(ph)PS(ph)PDPR	157 159
				QALGDGDIS(ph)PPR	326
				HDS(ph)EEPQDLS(phh)PPR	237 244
				HDS(ph)EEPKDLS(phh)PPR	271 278
				TRHDS(p)EEPEDLS(ph)PPR	288 295
Q10SU9	Os03g0110400	THO complex subunit 1, putative	Nuclear matrix protein	KQS(ph)PEEVS(ph)GPES(ph)GQCEAEADGEDNMK	605 610 614	1.09833	1.104	1.552			0.0155928	up
				EQQVVSATPETDGGGSGAEPEEGAVPMDS(ph)DNAAIDEGR	593
Q0J0H3	Os09g0509300	hydroxyproline-rich glycoprotein family protein, putative, expressed		SGSQS(ph)APLFPEK	316	1.016	1.00667	1.264			0.000646662	up
				VS(ph)PNT(phh)SPPLLSS(ph)PK	486 489 496
Q84QV5	Os08g0525700	expressed protein		LS(ph)SEFSADEINK	232	0.842	0.593667	0.517			0.0323668	down
				DGGS(ph)PAKPGS(ph)PK	1020 1026
				AAVSGQQQDWNS(ph)PAR	1040
Q2QT64	Os12g0405200	NnrU family protein		GSSIGGAGEDDS(ph)DGEVDGAPR	68	1.004	1.23967	1.34033	0.0493962	up	0.00176855	up
Q84M73	Os03g0857400	expressed protein		QDGDEVVDSNVLQYCS(ph)IDGK	81	0.965667	1.54567	2.341	0.0111364	up	0.000608496	up
				LITLPEPS(ph)Q	323
Q5N8I8	Os01g0700000	expressed protein		QQGDHPAGS(ph)DDGGNNNNNK	23	1.05167	1.21567	1.89533			0.00055087	up
				AAAS(ph)EADEEER	88
Q7XXR0	Os03g0744600	stem-specific protein TSJT1, putative, expressed	ligase activity, forming carbon-nitrogen bonds; protein dimerization activity; celluar amino acid metabolic process	VDS(ph)QGQMCGSNYK	217	1.05233	1.04967	1.38967			0.00144257	up
Q7XUK7	Os04g0497900	expressed protein		EEVETEEVES(ph)DDESEK	497	0.946	0.965	1.17333			0.0206783	up
				QEQTEDEDEQQEQIEDEDEQQES(ph)PR	580
Q7XI09	Os07g0445600	COP1-interacting protein 7 (CIP7)-like protein		ANHS(ph)PDADK	140	1.14633	0.686333	0.592	0.0146099	down	0.00336222	down
				VEDS(ph)NDEDVSHS(ph)NDGDVK	709 717
Q10C73	Os03g0792500	BTB/POZ domain containing protein		SQSVWGQLS(ph)DGGDTSGR	417	1.00667	1.002	1.251			0.0134288	up
				TVAGCEEECS(phh)S(ph)GGK	404 405
Q8LH03	Os07g0103200	DDRGK domain-containing protein 1	endoplasmic reticulum	DRDVDDADS(ph)DLEEEIQDVPR	84	1.019	1.12133	1.301			0.00189143	up
Q8S3S1	Os02g0708400	tetratricopeptide repeat domain containing protein, expressed		ASTEEGEAEVSKPGS(ph)R	179	1.07133	0.616	0.418667	0.00507518	down	0.00039056	down
				DNSSAPRS(ph)PVASK	32
				ESFGS(ph)DGEESR	84
				SQLESESS(ph)VGPNGK	158
				VIEEEEGEGS(ph)GNAANAVTAAENGTPVK	117
A0A0P0WPA0	Os05g0510700	Similar to BSD domain containing protein		TSLGQEEDVSFS(ph)DLEDDDDDGNK	382	1.03733	1.03467	1.50233			0.00588683	up
				ASS(ph)PEGSSPR	3
				GEEEEEGRDGEEES(ph)AQSPR	79
				DPDSDEAEQPDT(ph)PSR	14
Q7X776	Os04g0655600	expressed protein		ADAADGDS(ph)VENGTR	539	0.985667	1.00933	1.44			0.00650947	up
				APVAEPEIHMESDINS(ph)ASELR	464
				LGSSGS(ph)S(ph)PDASK	333 334
				VAGAEPANGHSS(ph)PITDK	389
				LFENDTSIFS(ph)SGTDK	358
A0A0P0X4N7	Os07g0243150	expressed protein		SVT(ph)AAAATEEK	26	1.138	1.02767	0.665333			0.00413242	down
Q6ZJC9	Os08g0477800	PWWP domain containing protein, expressed		QLS(ph)PTDGEDQASGK	192	1.06233	0.978333	1.32433			0.0104873	up
				ELSHVNS(ph)PCDSTEEAGNLK	117
Q6ZKL9	Os08g0500200	coiled-coil domain containing 49, putative, expressed		DHGQDS(ph)EDDERR	240	0.984333	1.001	1.302			0.0015702	up
				QS(phh)EVS(ph)GDDEPR	311 314
				HAT(ph)S(ph)EDDEPR	252 253
				HDS(ph)EDEEPR	289
Q6YS19	Os08g0282000	tetraspanin family protein, putative, expressed		AMNKPAEYDS(ph)DDEIIATSR	199	1.08	1.31233	1.33767	0.0279286	up	0.00350177	up
				AS(ph)RNDAWSQR	237
				S(ph)TSIRQPLIHSQNVPATGVPVATLEQR	209
Q5QNL2	Os01g0204000	POLD3 - Putative DNA polymerase delta complex subunit, expressed		EEANADS(ph)S(ph)DDEQAVHYK	295 296	1.02833	1.02933	1.26433			0.00178469	up
				QDHAAETASNS(ph)PK	422
Q0DNZ7	Os03g0725100	expressed protein	Polyadenylation factor I complex, subunit FIP1	AEQPTGHNS(ph)S(ph)DQDELR	48 49	1.058	1.04167	1.31767			0.0372982	up
				QAEEDPMS(ph)DDENHEDSR	512
Q9FVZ7	Os10g0502600	cytochrome b5-like Heme/Steroid binding domain containing protein, expressed	Putative steroid membrane receptor Hpr6.6/25-Dx	EVSS(ph)EEVK	210	1.02067	1.01833	1.239			0.00730142	up
A0A0P0VP27	Os02g0728300	Similar to ASC1-like protein 2	endoplasmic reticulum	GHVGDDVRS(ph)DS(ph)EGEEEHED	368 370	1.07667	1.299	1.48067	0.0415026	up	0.000918683	up
Q10NB4	Os03g0275500	Clathrin assembly protein, putative	phospholipid binding ; cytoplasm vesicle	QGSGSNASSSANGPS(ph)PR	173	1.07167	1.05567	1.31167			0.0428179	up
				S(ph)PPREPEPEPVKEEEPEPDMNEIK	363
Q60EV1	Os05g0241000	expressed protein		TRS(ph)S(ph)EDDDS(ph)GGEGTAEAVR	617 618 623	1.01633	1.04533	1.358			0.0136728	up
A0A0P0V256	Os01g0337600	suppressor of Mek		EEEDYFNEDS(ph)DEEDSVR	712	0.985	1.01167	1.336			0.00147077	up
Q0DUS0	Os03g0169900	Pathogenic type III effector avirulence factor Avr cleavage site domain containing protein		TS(ph)LGGDDDLLAQQK	54	1.00433	1.196	1.241			0.00619759	up
A0A0P0XN73	Os09g0481300	Similar to Rwp34		GS(ph)S(ph)DSDADDHGYDER	266 267	1.00567	0.991333	1.306			0.00577569	up
				VLYDDDDDDDDDAEQS(ph)DGEPPSEEAAR	234
A0A0P0VBK7	Os01g0896800	ribosomal L18p/L5e family protein		LNALNS(ph)SAGADDDDEEEDDE	319	1.00367	0.991333	1.27567			0.0191423	up
Q5N7H0	Os01g0861700	hemerythrin family protein, expressed		GRPTS(ph)PSGS(ph)PPLDR	16 20	1.06167	0.929667	0.828333			0.0125169	down
				SPS(ph)VSAAEADGDDGVVR	50
A0A0N7KQA7	Os08g0559700	expressed protein		TIAQEVNDDS(ph)DDDS(ph)GETESR	137 141	1.059	1.00667	1.473			0.0133803	up
Q10RH2	Os03g0159200	XS domain containing protein		GAGAASTSART(ph)PT(ph)PTPSTAGDPR	48 50	0.991333	0.893	1.21933			0.0269422	up
				ANQSVGSDNS(ph)PLLVETDNR	417
Q5TKF1	Os05g0596200	expressed protein		RVDYS(ph)DDDDDFIVK	149	1.043	1.11533	1.31667			0.0094206	up
A0A0P0XQG2	Os09g0530500	zinc ion binding		DNDLSEPHDT(ph)NDEEEGNS(ph)DSSSVR	235 243	0.938333	1.08833	1.84333			0.000467458	up
A0A0P0VNU0	Os02g0709900	Os02g0709900 protein		S(ph)VLAVVEDAK	118	0.964	0.864333	0.755			0.034053	down
				DSAVLPVVDLEPETS(ph)K	96
Q84SC5	Os08g0162600	rubredoxin family protein, putative, expressed		T(ph)GGGVVITAVDSGGNAAR	91	0.933333	1.041	1.23			0.00440236	up
A0A0P0WP57	Os05g0490000	KRR1 interacting protein 1 domain containing protein		DILAGS(ph)DNES(ph)DGGGGEEDLSK	18 22	1.05033	1.21467	1.41767			0.00243243	up
Q0E0T0	Os02g0525600	expressed protein		SFS(ph)NASSGSHGGGGGAK	41	0.999	0.917	1.63667			0.0164171	up
Q6Z343	Os02g0726400	BSD domain-containing protein, putative, expressed		IDGTSGLES(ph)DDDDDKEK	285	0.980667	0.856333	1.18667			0.0134104	up
Q6K271	Os09g0123200	heading dates in rice; OsFCA	RNA-binding protein CUGBP1/BRUNO (RRM superfamily)	WSSGGGGGGSGS(ph)PPHR	45	0.976667	0.924333	1.19633			0.005141	up
				GGPAFGGPGFS(ph)PR	313
Q6ESZ1	Os02g0542400	homeodomain, putative, expressed		TSPS(ph)DEEDVDDGHHHGGGGGSGK	68	1.14167	1.35267	1.80167			0.00107778	up
Q69K05	Os09g0103700	CAX-interacting protein 4 (CAXIP4)-like		STKRS(ph)DT(ph)EDDLEEER	237 239	0.994667	1.05433	1.496			2.12e-05	up
Q6K7R9	Os02g0826100	DEAD-box ATP-dependent RNA helicase 48		LRPDS(ph)S(ph)DEDDEDISTAK	237 238	0.979667	1.08967	1.90167			0.000102763	up
Q7XKE1	Os04g0679900	expressed protein		ESDYDS(ph)DDDPSVPAR	172	1.03267	0.956	1.47433			0.00078313	up
Q5Z9Z5	Os06g0319800	expressed protein		EEGS(ph)EEEDEEEEEER	89	1.04367	1.41167	1.594			0.0194893	up
Q7XVN8	Os04g0306800	RNA recognition motif containing protein, putative, expressed		EQSVLEKS(ph)PASCPTN	642	1.01367	1.08733	1.43733			0.00377277	up
Q7XVN7	Os04g0307200	translocation protein SEC62	RNA helicase BRR2, DEAD-box superfamily	NLETEVLQSQQVSS(ph)PAQSK	442	0.98	0.946	1.36067			0.013905	up
Q2QWJ7	Os12g0193200	mRNA-capping enzyme, putative		APS(ph)PNHEDDK	297	0.962667	0.916667	1.21633			0.0255927	up
A0A0N7KN54	Os07g0223700	expressed protein		QSGSNDSGSTS(ph)AGQS(ph)PR	228 232	1.02633	1.20467	1.46967			0.00115105	up
Q75I90	Os03g0702800	Eukaryotic peptide chain release factor subunit 1-2, putative, expressed		SFDELS(ph)DDEGVYEDSD	427	1.02133	0.959667	1.32433			0.00996855	up
Q5ZAN2	Os01g0766600	BSD domain containing protein, expressed		S(ph)IPS(ph)DSEK	339 342	1.02	0.957667	1.23933			0.01672	up
				EVLLQSS(ph)PTK	262
A0A0P0VV16	Os03g0218300	potyvirus VPg interacting protein		NETAS(ph)DVDEAGQSTSSNIR	377	1.002	1.00767	1.333			0.0212059	up
Q7XTF0	Os04g0462300	expressed protein		GS(ph)GGGGGGGEFASDDGGGAR	71	1.137	1.40333	1.57067			0.00683319	up
Q60ES2	Os05g0392100	glycine-rich protein, putative, expressed	Nuclear 5'-3' exoribonuclease-interacting protein, Rai1p	DLFGS(ph)DNEDYVK	118	1.03	0.876333	1.476			0.00529882	up
Q7X711	Os04g0579700	H-BTB3 - Bric-a-Brac, Tramtrack, Broad Complex BTB domain with H family conserved sequence, expressed		VAELIGSCS(ph)PGNQFNDADSSDVR	101	0.981667	1.03133	1.23033			0.0312496	up
Q2QNB5	Os12g0571900	Tetratricopeptide-like helical domain containing protein	mRNA cleavage and polyadenylation factor I complex, subunit RNA14			1.05167	1.03833	1.37633			0.0417448	up
Q0DFC9	Os06g0101600	Plastocyanin, chloroplastic ,PETE	electron carrier activity; oxidation and reduction activity	NNAGFPHNVVFDEDAVPSGVDVS(ph)K	110	0.987667	0.802	0.646333			0.0156731	down
Q6ZIQ1	Os07g0587400	TFIIIA-type zinc finger protein gene, ZFP245	Peptide chain release factor 1 (eRF1)	SFDELS(ph)DDEGLYEDSD	427	1.052	1.03733	1.331			0.0101049	up
Q0E0H1	Os02g0551900	ZOS2-09 - C2H2 zinc finger protein		NVLYEDDS(ph)EET(ph)EEEGDNVGDGAR	312 315	0.992	1.022	1.46467			0.0047376	up
				AAS(ph)SDDDEET(ph)EDEE	332 339
Q10CF1	Os03g0785300	Zinc finger, C3HC-like domain containing protein		WLPNVQDCEENSTHS(ph)AK	287	1.04767	1.00933	1.30333			0.00995101	up
				ADS(ph)VES(ph)GEK	773 776
				FS(ph)PNNIDAPETGK	360
Q5KQN3	Os03g0626600	Zinc finger, LIM-type domain containing protein	Adaptor protein Enigma and related PDZ-LIM proteins	AYEHDS(ph)DHEDIDR	40	1.02967	0.941333	1.341			0.0138912	up
Q2QMP4	Os12g0596800	Zinc finger, LIM-type domain containing protein		ALQESLNADS(ph)PPRQNIPVENVPSEPPR	87	1.02733	1.129	1.248			0.00379617	up
				GAYDES(ph)DNEDIDR	10
Q10E42	Os03g0708900	zinc finger family protein,		SFDDSFDREDDGS(ph)DPDEGER	427	0.992	1.439	1.49567	0.0108085	up	0.00173473	up
Q6Z1H3	Os08g0535400	zinc finger DHHC domain-containing protein, putative, expressed		NTHPPEPEGFDGSNDSGVQT(ph)PQQLR	129	1.068	1.07833	1.59833			0.00925446	up
A0A0P0VD31	Os01g0952300	FYVE zinc finger domain containing protein, expressed		LRS(ph)PFGS(ph)PPK	184 188	1.047	0.856	0.781667			0.00470231	down
A0A0P0W185	Os03g0669800	Zinc finger, FYVE-type domain containing protein		RES(ph)LDPELPGASSSSSSSR	144	1.087	1.12433	1.40333			0.0293181	up
A0A0P0Y9M7	Os12g0433133	Similar to PHD-finger family protein		DAPDFELELTDNNS(ph)PR	241	1.08733	1.162	1.424			0.0425612	up
A0A0P0VNC6	Os02g0689800	Similar to DEAD/DEAH box helicase domain-containing protein PIE1		RLEQEEAVDNQEFS(ph)EEAAGR	333	1.065	1.12967	1.28333			0.0129948	up
				SSFSSEALS(ph)PK	626
Q5W6N1	Os05g0342900	expressed protein		RPGYNAS(ph)DSDS(ph)DEMNDDEKQ	92 94	1.02333	0.992	1.45867			0.0178713	up
Q2R2B9	Os11g0571900	lymphoid organ expressed yellow head virus receptor protein, putative, expressed		MEDDVHS(phh)TT(ph)SSTNTPR	185 187	1.06933	0.750333	0.583333			0.0150798	down
				KPALSQSAS(ph)FPAR
Q5ZC69	Os01g0590200	xpressed protein	Conserved phosducin-like protein	GDIDEDS(ph)DDDGYADEETTCPGQNFTK	63	1.19033	1.32133	1.73233			0.00817224	up
Q10A91	Os03g64320	expressed protein		IS(ph)NSDDNVVVEK	1017	1.09433	0.673667	0.606667	0.00477361	down	0.00191325	down
Q69X98	Os06g0589500	expressed protein		AAHSATNVS(ph)PK	235	1.14233	0.714333	0.645333	0.00913476	down	0.00243779	down
Q7XB67	Os07g0204100	expressed protein		VTEEEEEEAFQGS(ph)DAK	103	1.10967	1.247	1.372			0.0438187	up
A0A0N7KN09	Os07g0179200	cyclophilin, putative, expressed,CYP63		S(ph)RS(ph)PAEHQR	196 198	1.028	1.04567	1.24667			0.000201361	up
				YRT(ph)PS(ph)PERS(ph)PVR	111 113 117
				NSS(ph)PPVNR	226
Q2QN76	Os12g0576300	expressed protein		TQES(ph)DGDDEDEFEDDDQDSK	587	0.994333	0.889667	1.22433			0.00272985	up
Q53KV7	Os11g25780	PB1 domain containing protein		YLVQSAS(ph)SR	223	0.986667	1.18	1.30533			0.000506299	up
				TTATTTAPLSRSPS(ph)PT(ph)AASR
Q652Q6	Os09g0568000	nucleic acid binding protein, putative, expressed		SSS(ph)LELSSGNR	244	0.953333	0.829333	0.692667			0.0152417	down
A0A0P0WB35	Os04g0454600	expressed protein		ASEVS(ph)DNDGYEEFNDR	252	1.05667	0.996	1.38533			0.00169392	up
B7ERE7	Os09g0555700	ZOS9-17 - C2H2 zinc finger protein		NQPGNPNPDAEVIALS(ph)PR	66	0.989	1.06933	1.20767			0.0151869	up
A0A0P0X662	Os07g0507700	Bromodomain domain containing protein		QEEEYLPEEPLS(ph)PSK	420	1.028	1.04333	1.319			0.00478758	up
				SESTGNELRPCDDAS(ph)TSPLASSR	400
Q0J9B4	Os04g0662800	RCC1 domain containing protein.		DVS(ph)ES(ph)EEDDDEEDDS(ph)DDDENGEIK	465 467 477	0.915333	1.134	1.24233			0.00872076	up
Q7XI49	Os07g0633200	RNA recognition motif containing protein, putative, expressed	FOG: RRM domain	GYS(ph)YS(ph)PS(ph)PPPR	6 8 10	1.06533	1.09467	1.45533			0.00319777	up
				ERS(ph)YS(ph)PVESR	180 182
				RAS(ph)S(ph)PIPR	21 22
Q94DS3	Os01g0761000	expressed protein		AAQDSSEPSS(ph)GSVVK	61	1.05167	1.11767	1.344			0.00114698	up
Q5QLF6	Os01g0680700	expressed protein		GMESMDS(ph)DS(ph)E	381 383	1.05133	1.05367	1.279			0.0472887	up
Q5ZCC0	Os01g0125700	expressed protein		ENANLIDADDS(ph)DELR	131	1.062	1.12567	1.65133			0.00851359	up
Q10RU8	Os03g0145500	DENN domain containing protein		GVGS(ph)DEEEELNMK	607	0.959333	0.938333	1.17733			0.00100856	up
Q5W769	Os05g0352800	expressed protein		EPQQAAAS(ph)PDSSEPSSSGTTK	72	0.893	0.874	1.96933			0.0220759	up
A0A0N7KI38	Os03g0764450	Similar to SWIB/MDM2 domain containing protein				1.05133	1.06333	1.45567			0.0129879	up
Q5QLQ9	Os01g0666200	HMG protein-like		ESGELS(ph)EES(ph)DYD	127 130	1.06267	1.04767	1.35467			0.00523605	up
Q5JJJ8	Os01g0920100	expressed protein		S(ph)PGSGSKDEMFFDSR	60	1.072	1.055	1.83433			0.00251267	up
A0A0P0WZF6	Os06g0631300	expressed protein		RS(ph)DS(ph)PDLEAR	81 83	1.03033	1.076	1.24233			0.0120674	up
				GPFCGS(ph)PDINSR	73
Q8H513	Os07g0520400	HEAT repeat family protein, putative, expressed		MDS(ph)PNNNDK	366	1.127	0.728667	0.708333	0.0193645	down	0.0105748	down
Q6AUH9	Os05g0145300	Os05g0145300protein		EPHDQQS(ph)EDS(ph)DQEELDR	331 334	0.887333	1.003	1.828			0.0276253	up
A0A0P0VGR0	Os02g0228151	transposon protein, putative		DDSGGAPS(ph)FSK	77	0.983667	1.08033	1.38167			0.00693399	up
Q6K6X2	Os02g0610400	RNA binding protein, putative, expressed		TTVNS(ph)DMEEQK	278	1.082	1.07867	1.53833			0.000471199	up
Q0IXM4	Os10g0422000	expressed protein		SEYPS(ph)S(ph)ELAR	218 218	1.04033	1.03833	1.69267			0.0028813	up
Q0JKN7	Os01g0661000	CASP-like protein		AAEAAES(ph)PTGS(ph)PQK	177 181	1.04	0.773	0.875333	0.00546756	down
Q6YW53	Os02g0219900	CASP-like protein 2D1		QQLSQEQGKPVVS(ph)G	200	0.991333	0.909333	1.20733			0.00781947	up
Q6K741	Os02g0475300	membrane attack complex component/perforin/complement C9, putative, expressed		TEWAAAPAAS(ph)QR	510	0.975667	0.981667	1.32567			0.00569853	up
A0A0N7KCJ7	Os01g0214300	bromodomain containing protein, expressed,Conserved hypothetical protein		YVGS(ph)SSPVHLEDQK	111	1.01167	0.973333	1.30333			0.0457852	up
A0A0P0XLI9	Os09g0410125	Similar to membrane alanyl aminopeptidase		GSKPDGS(ph)DENIDASNQDNR	193	0.917667	0.854333	1.292			0.039102	up
A0A0P0VPT6	Os02g0740500	Conserved hypothetical protein		EAVVGES(ph)DDEKEK	106	1.03467	1.10633	1.577			0.0257291	up
A0A0P0Y808	Os12g0209700	Hypothetical conserved gene		MAGLLDS(ph)PPNS(ph)PER	267 271	1.12333	1.28233	1.57367			0.0149115	up
A0A0P0Y7V1	Os12g0197400	Similar to chloroplast outer envelope protein 86		GEQQFEFDTYS(ph)DE	785	1.056	1.21433	1.525			0.018161	up
Q6K2L9	Os02g0480900	ataxin-2 related protein, putative, expressed	Protein interacting with poly(A)-binding protein	SSS(ph)GGFSGAENGGK	41	1.06133	1.164	1.64733			0.00180056	up
Q53PP2	Os11g0163800	expressed protein		SLS(ph)WSVSR	235	1.02133	0.889	0.757			0.0150303	down
B7FA27	Os05g0494700	expressed protein		S(ph)FSGVETTPK	93	1.02233	0.691333	0.68	0.0107416	down	0.00665641	down
Q6ZJR4	Os08g0155201	expressed protein		GGGGGS(ph)PELCFVPT	114	0.960667	0.865667	1.40167			0.0306763	up
Q0DY90	Os02g0708500	expressed protein		ISSPQEENETSVS(ph)PK	236	0.885	0.865667	1.08733			0.0347412	up
Q0DTD2	Os03g0255200	expressed protein		IIMQS(ph)FSDR	142	0.826	0.624	0.540667			0.0318694	down
Q336W9	Os10g0537300	expressed protein		KAPS(ph)DEVNDK	1028	0.931333	0.859667	1.26033			0.00684809	up
Q84ZR9	Os07g0584500	RNA recognition motif containing protein, putative, expressed		EQS(ph)PGPAAR	187	1.02333	0.869333	0.817333			0.0302041	down
Q7XVM5	Os04g0394700	hydroxyproline-rich glycoprotein family protein, putative, expressed		S(ph)SMDLDQSNQACS(ph)PEPLK	284 296	1.042	1.02633	1.38633			0.00580188	up
A0A0P0VP17	Os02g0717600	expressed protein		QDS(ph)FGGGELPR	465	0.993667	1.074	1.42367			0.00135881	up
Q69TZ2	Os06g0624900	zinc-binding protein, putative, expressed		WS(ph)DDEGSK	215	1.01133	1.11167	1.348			0.000203876	up
Q5Z9P3	Os06g0716000	expressed protein		SKS(ph)CEPPPNR	534	1.14467	1.53767	1.733	0.029593	up	0.00235202	up
Q10KT9	Os03g25450	h/ACA ribonucleoprotein complex subunit 4, putative, expressed	Pseudouridine synthase, nuclear part	AELS(ph)DGEK	545	1.02867	0.834333	0.69			0.00346597	down
Q0JBS2	Os04g0513000	Conserved hypothetical protein		S(ph)SGGGGGTNPGPKPGDDESK	49	1.13433	1.37933	1.92933			0.0094725	up
Q7EZC8	Os08g0159100	tetraspanin family protein, putative, expressed		YGVDT(ph)FDPNR	255	0.991	0.952333	1.28233			0.0274033	up
A0A0P0VRF7	Os02g0819300	pumilio-family RNA binding protein		ST(ph)T(ph)PDPQLIR	293 294	1.002	1.03733	1.30233			0.0177082	up
A0A0P0WGP3	Os04g0689500	expressed protein		TDSEVTSLAPSS(ph)PPRS(ph)PTSR		1.11267	0.77	1.07267	0.00867117	down
Q8L465	Os07g0633600	expressed protein		AS(ph)S(ph)GDDDDHPHPR	19 20	1.04733	0.778667	0.976333	0.0486378	down
Q688K3	Os05g0417500	expressed protein		NLS(ph)LEELAGEVGLS(ph)PGR	71 82	0.972	0.684333	0.869	0.00904407	down
A0A0P0X7K0	Os07g0564700	Similar to ATMIN7 (ARABIDOPSIS THALIANA HOPM INTERACTOR 7); guanyl-nucleotide exchange factor/ protein binding.		AQPAVS(ph)PR	70	1.08067	0.833	0.984	0.0375298	down
				APDADGADKT(ph)DDEENPMMETVR	121
Q6YZ52	Os02g0775400	Kinesin-like protein KIN-7D, chloroplastic,KIN7D	cytoskeletal protein binding	LTEEAGRS(ph)PNNEK	685	1.107	0.752667	0.820667	0.0468276	down
Q2R2E6	Os11g0568700	expressed protein		EKDALDSDS(ph)QR	483	1.04533	0.804	0.965667	0.0442582	down
A0A0P0X365	Os07g0185432	Similar to Seed specific protein Bn15D14A		KS(ph)PSVTPR	137	1.07133	0.823	0.899333	0.0176718	down
Q655M5	Os01g0101600	RNA recognition motif, putative, expressed		DAYS(ph)DADDDDDDRPHAPPGPVDPSK	67	0.948	0.972	1.15533			0.00954939	up
				ALSASAADDPDQDDDLHRPSSPAQAS(ph)R	62
				RSS(ph)S(ph)AS(ph)EDEMLNSNSK	730 731 733
				AGS(ph)RS(ph)PGQHK	643 645
				HREES(ph)LS(ph)PSK	629 631
				KVQSEDS(ph)PR	886
				DLDS(ph)VGS(ph)K	771 774
Q0JBZ3	Os04g0501600	AT hook motif family protein, expressed	Sister chromatid cohesion complex Cohesin, subunit PDS5	S(ph)PS(ph)GPSSSDK	335 337	1.006	1.017	1.272			0.00220923	up
				ELS(ph)PET(ph)DDGDNKLPPETGNR	418 421
				AVNNNEDILVS(ph)R	414
				KAELPS(ph)DDNQAK	350
				IVSDES(ph)AQESSK	294
				EGES(ph)S(ph)EEEEHVSAK	823 824
A0A0P0WAD7	Os04g0423600	expressed protein		SGTDDYS(ph)GGGGYNK	91	1.01933	1.11733	1.57567			1.16821e-05	up
				NTNTDEYGS(ph)TGS(ph)YNK	66 69
				SNT(ph)DDLTGGFNK	75
				DTGLFNES(ph)GNDDNESGYK	54
				RS(ph)GADDEEGGYNK	13
				SGTDNYSGS(ph)GGYNK	119
A0A0P0X1C3	Os06g0728600	calcium-binding EF hand family protein		S(ph)PPVS(ph)PVK	805 809	1.05767	0.810667	0.977	0.00565967	down
Q6H5G6	Os09g0375400	calmodulin-binding protein, putative, expressed		ELVSYPLGGS(ph)GGAGAD	230	1.019	1.105	1.35133			0.00156029	up
A0A0P0WG85	Os04g0663100	IQ calmodulin-binding motif family protein, putative, expressed		ASASVS(ph)PKLS(ph)PDVQDNNPR	832 836	1.10833	0.847	0.721667			0.0045875	down
				SQDNVS(ph)PK	588
				SNS(ph)LDGANKPK	569
				ENNES(ph)VDEK	400
				ILACAGGGSDPSAGS(ph)DGDADDHVDENK	25
Q75L83	Os05g0123200	IQ calmodulin-binding motif domain containing protein, expressed		SVFS(ph)VQS(ph)ERPR	361 364	1.12333	0.774333	0.611333			0.00303346	down
Q6Z6R6	Os02g0313700	C2 domain-containing protein-like	Ca2+-dependent lipid-binding protein CLB1/vesicle protein vp115/Granuphilin A, contains C2 domain	VPNDDDEQCGT(ph)PK	418	0.986333	0.990667	1.23967			0.0293765	up
Q6ETC4	Os02g0448400	NTMC2Type1.2 protein, putative, expressed	Ca2+-dependent lipid-binding protein CLB1/vesicle protein vp115/Granuphilin A, contains C2 domain; endoplasmic reticulum	EGDS(ph)DVDT(ph)S(ph)DESGTIEK	396 400 401	0.834	0.534667	0.548	0.0495811	down
Q943K1	Os01g0869800	photosystem b,psbS1		GSFVDDQPVT(ph)GLDK	165	0.987667	1.20733	1.17	0.0286915	up
Q0JPH5	Os01g0222700	hAT dimerisation domain-containing protein	protein dimerization activity	DLPS(ph)QPTS(ph)PER	93 97	0.997333	0.994333	1.326			0.00427645	up
Q0J1C5	Os09g0450300	microtubule associated protein, putative, expressed	cytoskeletal protein binding; cell devision	SELSEYS(ph)DGDDK	142	1.00833	0.776	0.707667	0.0309052	down	0.00828515	down
Q6K647	Os02g0505400	Exo70 protein	Exocyst component protein and related proteins; secretion by cell	ILS(ph)GFDNR	50	1.03	0.931667	0.655			0.0360766	down
Q69P90	Os09g0439600	exo70 exocyst complex subunit, putative, expressed	secretion by cell	LAPPS(ph)PATVGS(ph)PR	67 73	1.10467	1.09067	1.514			0.00240791	up
C7IWB6	Os01g0923300	CBS domain-containing protein, putative, expressed		SVS(ph)SSTGSR	16	0.975333	0.924	0.756			0.0480894	down
Q5JMT5	Os01g0961200	CBS domain-containing protein-like		MATS(ph)DNAEGK	388	0.954667	0.937667	1.97633			0.000229272	up
Q2QX49	Os12g0169400	CBS domain-containing protein, putative		ASS(ph)KPTSPGQLTGER	42	0.954	0.944333	1.184			0.0145014	up
Q0DXV3	Os02g0731600	Similar to Threonine endopeptidase		AS(ph)SDDTSSSAATGDELIEDLK	6	1.076	1.542	1.256	0.00113914	up
Q0JD43	Os04g0432400	neutral/alkaline invertase	hydrolase activity, acting on glycosyl bonds	S(ph)LCGT(ph)PASSTR	88 91	1.05567	1.10033	1.55433			0.00298594	up
Q10MJ1	Os03g0307100	Probable glutamyl endopeptidase, chloroplastic	Dipeptidyl aminopeptidase; sering hydrolase activity	TDS(ph)DSVADTENK	904	0.977	1.05367	1.22067			9.14e-05	up
A0A0P0UYD8	Os01g0155400	Protein of unknown function DUF3245 domain containing protein		AESSPS(ph)PVQVPST(ph)PK	375 382	0.998	1.06767	1.307			0.00276719	up
				AETVVS(ph)PKS(ph)PAKPDQPLDLDSELAK	390 393
Q6ERT7	Os02g0269000	protein of unknown function DUF502 domain containing protein, expressed		DSDS(ph)DDESKPSSASAAAAAAQTGR	53	1.03133	0.752333	0.907667	0.0141515	down
Q6K5X7	Os02g0614600	plant protein of unknown function DUF869 domain containing protein, expressed		LEMASGGQGLRS(ph)PK	357	1.17033	0.809333	0.638	0.0291461	down	0.00454066	down
Q10P54	Os03g14250	plant protein of unknown function DUF869 domain containing protein		S(ph)SSDPEIEGPTDSGCDVK	739	1.105	0.842333	1.26767	0.0396991	down
A0A0P0WE19	Os04g0587500	Domain of unknown function DUF250 domain containing protein		EQES(ph)DHGEDGSAPK	7	0.992333	0.966333	1.367			0.0204916	up
Q6Z9J1	Os08g0439100	DUF1336 domain containing protein, expressed		GES(ph)FEDEDS(ph)DDDDDMIPK	475 481	1.02967	1.11467	1.267			0.00105272	up
A0A0P0W719	Os04g0177600	Similar to Actin-related protein 9		S(ph)TPDDTEPNSEENMYK	160	1.04667	1.00567	1.342			0.0106263	up
A0A0P0XDG3	Os08g0230200	expressed protein		NTS(ph)FGGAGSNS(ph)GPVSNALGR	75, 83	1.06867	0.707333	0.544	0.0111308	down	0.000347216	down
				KVS(ph)GPLDPSVS(ph)MK	178, 186
				KSS(ph)GPQS(ph)GGVT(ph)PMAR	130, 134, 138
				SNYS(ph)GSISSSVPGAGGS(ph)AR	96, 109
				AKS(ph)NS(ph)GPLNK	114, 116
