# Supplementary material for: The Phosphoproteomic Response of Rice Seedlings to Cadmium Stress
Source: Int J Mol Sci. 2017 Sep 27;18(10):2055. doi: 10.3390/ijms18102055 (PMC5666737; doi:10.3390/ijms18102055)
Supplement: Supplementary file 1 [file ijms-18-02055-s001.zip › Additional file 5-Table S5.xlsx]

## Sheet: Table S5A
Additional file 5-Table S5A: Compared to the control(NC), 79 differently phosphorylated proteins identified in 10 μΜ Cd stress( M10)
protein	NC-1	NC-2	NC-3	Μ10-1	Μ10-2	Μ10-3	NC_mean	Μ10_mean	FC(Μ10/NC)	log2FC(Μ10/NC)	P value	significant	regulate
P18566	1	1.03	1.095	1.324	1.576	1.419	1.04167	1.43967	1.38208	0.466841	0.00717663	yes	up
Q0DG76	1	0.998	1.093	1.321	1.301	1.402	1.03033	1.34133	1.30184	0.380557	0.00211297	yes	up
Q2QYY8	1	1.051	0.907	1.408	1.137	1.287	0.986	1.27733	1.29547	0.373476	0.0306872	yes	up
Q943K1	1	0.914	1.049	1.104	1.275	1.243	0.987667	1.20733	1.22241	0.289728	0.0286915	yes	up
Q2QT64	1	1.08	0.932	1.27	1.348	1.101	1.004	1.23967	1.23473	0.304193	0.0493962	yes	up
Q84M73	1	0.934	0.963	1.289	1.687	1.661	0.965667	1.54567	1.60062	0.678632	0.0111364	yes	up
Q0DXV3	1	1.13	1.098	1.604	1.555	1.467	1.076	1.542	1.43309	0.519125	0.00113914	yes	up
Q6YS19	1	1.114	1.126	1.421	1.235	1.281	1.08	1.31233	1.21512	0.281103	0.0279286	yes	up
A0A0P0VP27	1	1.075	1.155	1.276	1.413	1.208	1.07667	1.299	1.2065	0.27083	0.0415026	yes	up
Q0D4F7	1	1.008	1.233	1.568	1.489	1.56	1.08033	1.539	1.42456	0.510517	0.00466517	yes	up
Q688U3	1	0.975	1.087	1.341	1.187	1.277	1.02067	1.26833	1.24265	0.313422	0.0115581	yes	up
Q2QM48	1	1.097	1.089	1.299	1.343	1.276	1.062	1.306	1.22976	0.298371	0.00267853	yes	up
Q651D5	1	1.023	0.974	2.133	1.767	1.7	0.999	1.86667	1.86854	0.901908	0.00303871	yes	up
Q10MY9	1	1.065	0.991	1.207	1.248	1.318	1.01867	1.25767	1.23462	0.304068	0.00391335	yes	up
Q5JNI5	1	1.163	1.119	1.443	1.25	1.327	1.094	1.34	1.22486	0.29262	0.0295977	yes	up
Q9MBF2	1	0.999	0.88	1.045	1.257	1.227	0.959667	1.17633	1.22577	0.293692	0.0486496	yes	up
Q5W770	1	0.89	0.829	1.275	1.108	1.392	0.906333	1.25833	1.38838	0.4734	0.0217483	yes	up
Q68Y36	1	1.04	0.932	1.323	1.087	1.191	0.990667	1.20033	1.21164	0.276963	0.0494298	yes	up
A0A0N7KJ06	1	1.205	0.98	1.319	1.291	1.268	1.06167	1.29267	1.21758	0.284019	0.0346026	yes	up
Q10F25	1	1.024	0.855	1.342	1.126	1.141	0.959667	1.203	1.25356	0.326031	0.0495808	yes	up
Q6Z7V2	1	0.88	0.877	1.197	1.379	1.281	0.919	1.28567	1.39898	0.48438	0.0052469	yes	up
Q10E42	1	1.04	0.936	1.258	1.577	1.482	0.992	1.439	1.4506	0.536655	0.0108085	yes	up
Q8H4V1	1	1.171	1.084	1.37	1.392	1.364	1.085	1.37533	1.26759	0.342086	0.00440647	yes	up
Q7XX94	1	0.866	0.895	3.25	3.546	2.477	0.920333	3.091	3.35857	1.74785	0.00250206	yes	up
Q0DPL9	1	0.925	0.911	1.248	1.077	1.135	0.945333	1.15333	1.22003	0.286915	0.0221697	yes	up
Q5Z9P3	1	1.255	1.179	1.68	1.367	1.566	1.14467	1.53767	1.34333	0.425815	0.029593	yes	up
A0A0P0XDG3	1	1.149	1.057	0.844	0.639	0.639	1.06867	0.707333	0.661884	-0.59535	0.0111308	yes	down
Q7X8W5	1	1.183	1.027	0.786	0.578	0.587	1.07	0.650333	0.607788	-0.71836	0.00908206	yes	down
Q0JAK9	1	1.198	1.017	0.861	0.584	0.656	1.07167	0.700333	0.653499	-0.613743	0.0236538	yes	down
Q5WA73	1	1.066	1.311	0.642	0.566	0.552	1.12567	0.586667	0.521173	-0.940167	0.00545675	yes	down
Q6ETC4	1	0.866	0.636	0.566	0.525	0.513	0.834	0.534667	0.641087	-0.641408	0.0495811	yes	down
Q7XI09	1	1.272	1.167	0.843	0.621	0.595	1.14633	0.686333	0.598721	-0.740045	0.0146099	yes	down
Q10N88	1	1.104	0.872	0.819	0.709	0.696	0.992	0.741333	0.747312	-0.420218	0.0319819	yes	down
Q8S3S1	1	1.183	1.031	0.733	0.545	0.57	1.07133	0.616	0.574984	-0.798405	0.00507518	yes	down
Q2QS14	1	1.257	1.285	0.85	0.766	0.742	1.18067	0.786	0.665726	-0.587	0.0149376	yes	down
Q8LH97	1	0.991	1.163	0.448	0.501	0.763	1.05133	0.570667	0.542803	-0.8815	0.0128368	yes	down
Q0DXR0	1	1.231	0.882	0.783	0.68	0.706	1.03767	0.723	0.696756	-0.521276	0.0424206	yes	down
A0A0P0X1C3	1	1.052	1.121	0.869	0.786	0.777	1.05767	0.810667	0.766467	-0.383704	0.00565967	yes	down
Q2QP63	1	1.062	0.934	0.878	0.692	0.69	0.998667	0.753333	0.754339	-0.406715	0.0276466	yes	down
Q7XXI7	1	1.145	1.023	0.845	0.87	0.804	1.056	0.839667	0.795139	-0.330721	0.0115019	yes	down
Q8RZQ8	1	1.088	0.997	0.794	0.67	0.667	1.02833	0.710333	0.690762	-0.53374	0.00346799	yes	down
Q0JKN7	1	1.124	0.996	0.819	0.767	0.733	1.04	0.773	0.743269	-0.428043	0.00546756	yes	down
Q84ZN6	1	1.176	1.251	0.927	0.87	0.778	1.14233	0.858333	0.751386	-0.412374	0.030003	yes	down
A0A0P0WGP3	1	1.216	1.122	0.839	0.732	0.739	1.11267	0.77	0.692031	-0.531091	0.00867117	yes	down
Q10L71	1	1.263	1.283	0.959	0.753	0.756	1.182	0.822667	0.695995	-0.52285	0.0343088	yes	down
Q8L465	1	1.16	0.982	0.928	0.739	0.669	1.04733	0.778667	0.743475	-0.427643	0.0486378	yes	down
Q688K3	1	1.052	0.864	0.712	0.638	0.703	0.972	0.684333	0.704047	-0.506257	0.00904407	yes	down
Q6YUA1	1	1.224	1.093	0.842	0.922	0.769	1.10567	0.844333	0.763642	-0.389032	0.0292134	yes	down
Q5QNI2	1	1.119	0.813	0.675	0.622	0.585	0.977333	0.627333	0.641883	-0.639618	0.0195845	yes	down
Q10P54	1	1.222	1.093	0.96	0.774	0.793	1.105	0.842333	0.762293	-0.391583	0.0396991	yes	down
Q0DL73	1	1.262	1.026	0.707	0.555	0.539	1.096	0.600333	0.547749	-0.868412	0.00746846	yes	down
Q10A91	1	1.205	1.078	0.753	0.667	0.601	1.09433	0.673667	0.615595	-0.699945	0.00477361	yes	down
Q69X98	1	1.207	1.22	0.821	0.69	0.632	1.14233	0.714333	0.625328	-0.677314	0.00913476	yes	down
Q7Y0D4	1	0.918	0.751	0.7	0.662	0.563	0.889667	0.641667	0.721244	-0.471441	0.0416864	yes	down
A0A0P0WTV3	1	1.427	1.03	0.635	0.8	0.69	1.15233	0.708333	0.614695	-0.702058	0.0382866	yes	down
Q69SV0	1	0.765	0.656	0.461	0.558	0.484	0.807	0.501	0.620818	-0.687758	0.0442607	yes	down
Q2QS13	1	1.284	1.237	0.754	0.664	0.631	1.17367	0.683	0.581937	-0.781065	0.00674151	yes	down
Q6ZI51	1	0.89	0.699	0.581	0.586	0.596	0.863	0.587667	0.680958	-0.554362	0.0352798	yes	down
Q8H513	1	1.295	1.086	0.845	0.662	0.679	1.127	0.728667	0.646554	-0.629157	0.0193645	yes	down
Q84SL0	1	0.87	0.769	0.639	0.641	0.658	0.879667	0.646	0.734369	-0.445423	0.0253334	yes	down
A0A0P0X7K0	1	1.199	1.043	0.94	0.772	0.787	1.08067	0.833	0.77082	-0.375533	0.0375298	yes	down
Q6Z0T2	1	1.189	1.106	0.935	0.843	0.806	1.09833	0.861333	0.784219	-0.350672	0.0238433	yes	down
Q6ERT7	1	1.014	1.08	0.877	0.694	0.686	1.03133	0.752333	0.729476	-0.455067	0.0141515	yes	down
Q6Z7S3	1	1.223	0.972	0.879	0.685	0.708	1.065	0.757333	0.711111	-0.491853	0.0373354	yes	down
B7FA27	1	1.126	0.941	0.785	0.619	0.67	1.02233	0.691333	0.676231	-0.564412	0.0107416	yes	down
Q10QA8	1	1.029	1.018	0.896	0.741	0.796	1.01567	0.811	0.79849	-0.324653	0.0113791	yes	down
Q0J1C5	1	1.077	0.948	0.896	0.729	0.703	1.00833	0.776	0.769587	-0.377844	0.0309052	yes	down
Q5SMQ9	1	1.145	0.917	0.778	0.633	0.694	1.02067	0.701667	0.687459	-0.540654	0.0154822	yes	down
Q6YZ52	1	1.337	0.984	0.843	0.736	0.679	1.107	0.752667	0.679916	-0.556572	0.0468276	yes	down
Q0DJF8	1	1.258	1.206	0.937	0.863	0.869	1.15467	0.889667	0.770497	-0.37614	0.0322507	yes	down
Q7XN85	1	0.822	0.743	0.54	0.582	0.471	0.855	0.531	0.621053	-0.687213	0.0172135	yes	down
Q6K5X7	1	1.289	1.222	0.937	0.759	0.732	1.17033	0.809333	0.691541	-0.532114	0.0291461	yes	down
Q2R2E6	1	1.127	1.009	0.947	0.711	0.754	1.04533	0.804	0.769133	-0.378696	0.0442582	yes	down
A0A0P0X365	1	1.118	1.096	0.927	0.784	0.758	1.07133	0.823	0.768202	-0.380443	0.0176718	yes	down
Q0E2W4	1	0.886	0.846	0.691	0.685	0.723	0.910667	0.699667	0.768302	-0.380255	0.011413	yes	down
Q75HT8	1	1.204	0.985	0.811	0.67	0.829	1.063	0.77	0.724365	-0.465211	0.0277939	yes	down
A3BAV3	1	1.066	1.03	0.839	0.735	0.674	1.032	0.749333	0.726098	-0.461763	0.0054847	yes	down
Q2QQD1	1	0.921	0.809	0.659	0.645	0.694	0.91	0.666	0.731868	-0.450344	0.0130672	yes	down
Q6L4W5	1	1.081	0.973	0.542	0.534	0.446	1.018	0.507333	0.498363	-1.00473	0.000335165	yes	down

## Sheet: Table S5B
Additional file 5-Table S5B: Compared to the control (NC), 448 differently phosphorylated proteins identified in 100 μΜ Cd stress (H100).
protein	NC-1	NC-2	NC-3	H100-1	H100-2	H100-3	NC_mean	H100_mean	FC(H100/NC)	log2FC(H100/NC)	P value	significant	regulate
Q655M5	1	0.964	0.88	1.107	1.16	1.199	0.948	1.15533	1.21871	0.28535	0.00954939	yes	up
Q0JBZ3	1	1.027	0.991	1.289	1.202	1.325	1.006	1.272	1.26441	0.338468	0.00220923	yes	up
A0A0P0WAD7	1	1.018	1.04	1.575	1.546	1.606	1.01933	1.57567	1.54578	0.628336	1.17e-05	yes	up
Q2QN51	1	1.072	1.001	1.323	1.221	1.381	1.02433	1.30833	1.27725	0.353045	0.00565245	yes	up
Q5ZDH9	1	1.125	0.924	1.507	1.531	1.613	1.01633	1.55033	1.52542	0.609205	0.00132823	yes	up
Q2QZU5	1	1.079	1.105	1.405	1.308	1.463	1.06133	1.392	1.31156	0.391281	0.00389162	yes	up
Q6Z411	1	0.918	1.014	1.145	1.322	1.369	0.977333	1.27867	1.30832	0.387718	0.0155289	yes	up
P18566	1	1.03	1.095	1.336	1.278	1.206	1.04167	1.27333	1.2224	0.289716	0.00782083	yes	up
Q6ZHZ1	1	1.114	1.026	1.385	1.326	1.543	1.04667	1.418	1.35478	0.438055	0.00718196	yes	up
Q7XXQ8	1	1.05	1.018	1.391	1.181	1.376	1.02267	1.316	1.28683	0.363824	0.0132756	yes	up
Q6AVL0	1	1.046	1.044	1.386	1.326	1.483	1.03	1.39833	1.35761	0.441064	0.00156783	yes	up
Q0JGK4	1	0.949	0.985	1.227	1.261	1.296	0.978	1.26133	1.28971	0.367043	0.000346387	yes	up
Q2QNB0	1	1.033	0.951	1.319	1.275	1.439	0.994667	1.34433	1.35154	0.434606	0.00303101	yes	up
Q7F1J8	1	1.046	1.023	1.263	1.193	1.374	1.023	1.27667	1.24796	0.319576	0.00953308	yes	up
A0A0P0XZL7	1	0.922	1.065	1.451	1.351	1.527	0.995667	1.443	1.44928	0.535337	0.00242062	yes	up
Q2QM23	1	1.039	1.066	1.334	1.183	1.332	1.035	1.283	1.23961	0.30989	0.0097969	yes	up
Q6ZFM7	1	0.858	0.863	1.901	2.183	1.97	0.907	2.018	2.22492	1.15375	0.000328752	yes	up
Q5JN45	1	1.075	0.932	1.148	1.266	1.204	1.00233	1.206	1.20319	0.266868	0.0190406	yes	up
Q5N725	1	1.033	0.91	1.2	1.132	1.2	0.981	1.17733	1.20014	0.263198	0.0104451	yes	up
Q2QXA8	1	1.065	0.904	1.286	1.278	1.403	0.989667	1.32233	1.33614	0.418071	0.00575631	yes	up
Q0D934	1	1.043	1.08	1.294	1.249	1.385	1.041	1.30933	1.25776	0.330862	0.00437243	yes	up
Q5ZCD9	1	1.077	1.027	1.257	1.251	1.325	1.03467	1.27767	1.23486	0.304345	0.00175879	yes	up
Q6ZD98	1	1.135	1.043	1.364	1.28	1.479	1.05933	1.37433	1.29736	0.375575	0.0108691	yes	up
Q53QT1	1	1.04	1.122	1.263	1.223	1.399	1.054	1.295	1.22865	0.297077	0.0199193	yes	up
Q9ARU4	1	1.003	0.932	1.161	1.176	1.222	0.978333	1.18633	1.21261	0.278111	0.00215174	yes	up
Q0DP22	1	1.057	0.952	1.243	1.16	1.28	1.003	1.22767	1.22399	0.291597	0.00857233	yes	up
A0A0N7KMU9	1	1.083	0.937	1.336	1.186	1.414	1.00667	1.312	1.30331	0.382182	0.0181775	yes	up
A0A0P0WQU7	1	1.186	0.967	1.445	1.266	1.513	1.051	1.408	1.33968	0.421885	0.02365	yes	up
Q0D5J1	1	1.055	1.022	1.244	1.185	1.3	1.02567	1.243	1.21189	0.277264	0.00413374	yes	up
Q0J4A3	1	1.046	0.952	1.298	1.191	1.37	0.999333	1.28633	1.28719	0.364227	0.00808508	yes	up
Q5QMK7	1	1.102	1.038	1.591	1.556	1.625	1.04667	1.59067	1.51975	0.603829	0.000109512	yes	up
Q84L14	1	1.007	0.913	1.485	1.372	1.521	0.973333	1.45933	1.49932	0.584304	0.000851013	yes	up
Q2QYY8	1	1.051	0.907	1.488	1.591	1.396	0.986	1.49167	1.51285	0.597266	0.00198467	yes	up
Q0JRB9	1	1.018	0.919	1.26	1.195	1.364	0.979	1.273	1.30031	0.378852	0.00708047	yes	up
Q69V56	1	1.042	1.085	1.392	1.469	1.376	1.04233	1.41233	1.35497	0.438264	0.000608334	yes	up
Q9LGR0	1	1.094	1.024	1.523	1.399	1.606	1.03933	1.50933	1.45221	0.538253	0.00210577	yes	up
Q69IM3	1	1.19	1.101	1.502	1.294	1.532	1.097	1.44267	1.3151	0.395174	0.0203916	yes	up
Q84T85	1	1.067	0.973	1.298	1.251	1.486	1.01333	1.345	1.3273	0.408497	0.0125943	yes	up
Q6YSF3	1	1.058	0.998	1.434	1.381	1.572	1.01867	1.46233	1.43554	0.52159	0.00180996	yes	up
Q8LIB1	1	1.112	1.099	1.494	1.39	1.459	1.07033	1.44767	1.35254	0.435669	0.00127845	yes	up
Q7XUF9	1	1.025	0.937	1.282	1.295	1.411	0.987333	1.32933	1.34639	0.429094	0.00215761	yes	up
Q18PR9	1	1.056	0.954	1.302	1.175	1.344	1.00333	1.27367	1.26944	0.344187	0.0100151	yes	up
Q33B10	1	1.145	1.118	1.608	1.365	1.904	1.08767	1.62567	1.49464	0.579795	0.0293969	yes	up
Q6ZKE8	1	1.066	1.011	1.263	1.163	1.32	1.02567	1.24867	1.21742	0.283826	0.0113312	yes	up
Q10SU9	1	1.154	1.141	1.57	1.369	1.717	1.09833	1.552	1.41305	0.498813	0.0155928	yes	up
Q5Z7Y7	1	0.964	0.937	1.202	1.216	1.191	0.967	1.203	1.24405	0.315049	0.000274414	yes	up
Q0J0H3	1	1.01	1.038	1.274	1.22	1.298	1.016	1.264	1.24409	0.315096	0.000646662	yes	up
Q2R0E9	1	0.97	1.108	1.262	1.321	1.346	1.026	1.30967	1.27648	0.352169	0.00434161	yes	up
A0A0P0XKY3	1	1.098	0.992	1.528	1.299	1.515	1.03	1.44733	1.40518	0.490753	0.0069455	yes	up
Q2QT64	1	1.08	0.932	1.355	1.31	1.356	1.004	1.34033	1.33499	0.416833	0.00176855	yes	up
A0A0P0UYD8	1	1.004	0.99	1.296	1.232	1.393	0.998	1.307	1.30962	0.389147	0.00276719	yes	up
Q6K3F7	1	1.032	0.975	1.288	1.228	1.263	1.00233	1.25967	1.25673	0.32968	0.000427178	yes	up
Q2QMP4	1	1.022	1.06	1.206	1.227	1.311	1.02733	1.248	1.2148	0.280714	0.00379617	yes	up
A0A0N7KFQ9	1	1.039	0.938	1.437	1.309	1.456	0.992333	1.40067	1.41149	0.497217	0.00172481	yes	up
Q84M73	1	0.934	0.963	2.065	2.449	2.509	0.965667	2.341	2.42423	1.27753	0.000608496	yes	up
Q5N8I8	1	1.084	1.071	1.968	1.736	1.982	1.05167	1.89533	1.80222	0.849774	0.00055087	yes	up
Q5Z754	1	1.055	0.92	1.149	1.166	1.292	0.991667	1.20233	1.21244	0.27791	0.0243241	yes	up
Q7XXR0	1	1.088	1.069	1.329	1.394	1.446	1.05233	1.38967	1.32056	0.401147	0.00144257	yes	up
Q10E10	1	1.087	1.059	1.318	1.227	1.284	1.04867	1.27633	1.2171	0.283449	0.00350708	yes	up
Q5Z7T2	1	1.031	1.083	1.339	1.263	1.401	1.038	1.33433	1.28548	0.362313	0.00315376	yes	up
Q5JLB5	1	1.118	1.001	1.315	1.187	1.425	1.03967	1.309	1.25906	0.332344	0.0271978	yes	up
Q7XUK7	1	0.972	0.866	1.101	1.161	1.258	0.946	1.17333	1.24031	0.310701	0.0206783	yes	up
Q0J8A4	1	1.117	0.971	1.328	1.234	1.331	1.02933	1.29767	1.26069	0.33421	0.0080756	yes	up
A0A0P0X0B1	1	1.017	1.004	1.422	1.266	1.536	1.007	1.408	1.39821	0.483584	0.00691862	yes	up
Q6YZW8	1	1.129	1.094	1.49	1.441	1.522	1.07433	1.48433	1.38163	0.466373	0.000815087	yes	up
Q5Z4V2	1	1.169	0.9	1.597	1.397	1.524	1.023	1.506	1.47214	0.557916	0.00784139	yes	up
Q0DK70	1	1.176	0.919	1.616	1.481	1.671	1.03167	1.58933	1.54055	0.623445	0.0041347	yes	up
Q10C73	1	1.031	0.989	1.222	1.171	1.36	1.00667	1.251	1.24272	0.313496	0.0134288	yes	up
Q5QLH2	1	1.032	0.964	1.493	1.283	1.496	0.998667	1.424	1.4259	0.511874	0.00436344	yes	up
Q8H5M0	1	1.1	0.903	1.346	1.362	1.345	1.001	1.351	1.34965	0.432586	0.00359818	yes	up
Q8LH03	1	1.006	1.051	1.343	1.231	1.329	1.019	1.301	1.27674	0.352467	0.00189143	yes	up
Q8LHL0	1	1.031	1.035	1.399	1.442	1.633	1.022	1.49133	1.45923	0.545208	0.00297298	yes	up
A0A0P0WPA0	1	1.12	0.992	1.41	1.443	1.654	1.03733	1.50233	1.44826	0.534325	0.00588683	yes	up
Q5ICN3	1	1.089	1.012	1.289	1.215	1.401	1.03367	1.30167	1.25927	0.332589	0.0116407	yes	up
Q6Z2V3	1	1.068	1.021	1.253	1.129	1.355	1.02967	1.24567	1.20978	0.274741	0.0342014	yes	up
Q0E0H1	1	1.04	0.936	1.456	1.335	1.603	0.992	1.46467	1.47648	0.56216	0.0047376	yes	up
Q7X776	1	1.025	0.932	1.378	1.338	1.604	0.985667	1.44	1.46094	0.546897	0.00650947	yes	up
Q94DL7	1	1.172	1.158	2.462	2.231	2.303	1.11	2.332	2.1009	1.07101	0.000154127	yes	up
Q0E4T3	1	1.058	1.027	1.213	1.26	1.313	1.02833	1.262	1.22723	0.295404	0.00219516	yes	up
Q6ZJC9	1	1.139	1.048	1.295	1.273	1.405	1.06233	1.32433	1.24663	0.31803	0.0104873	yes	up
Q6ZKL9	1	1.008	0.945	1.285	1.249	1.372	0.984333	1.302	1.32272	0.403511	0.0015702	yes	up
Q6YS19	1	1.114	1.126	1.355	1.342	1.316	1.08	1.33767	1.23858	0.308687	0.00350177	yes	up
Q8H7S7	1	0.963	0.802	1.138	1.108	1.129	0.921667	1.125	1.22061	0.287608	0.0296479	yes	up
Q5QNL2	1	1.042	1.043	1.216	1.262	1.315	1.02833	1.26433	1.2295	0.298069	0.00178469	yes	up
Q0DNZ7	1	1.1	1.074	1.304	1.188	1.461	1.058	1.31767	1.24543	0.316646	0.0372982	yes	up
Q8H903	1	1.12	1.037	1.32	1.328	1.506	1.05233	1.38467	1.31581	0.395947	0.0091298	yes	up
Q9FVZ7	1	1.084	0.978	1.219	1.202	1.296	1.02067	1.239	1.21391	0.279664	0.00730142	yes	up
Q10CF1	1	1.096	1.047	1.291	1.227	1.392	1.04767	1.30333	1.24403	0.315026	0.00995101	yes	up
Q6H547	1	1.05	1.062	1.27	1.225	1.356	1.03733	1.28367	1.23747	0.307391	0.00454399	yes	up
Q2QX49	1	0.853	1.009	1.2	1.214	1.138	0.954	1.184	1.24109	0.311608	0.0145014	yes	up
Q8H991	1	1.071	0.967	1.356	1.342	1.602	1.01267	1.43333	1.4154	0.501215	0.00942816	yes	up
P35683	1	1.257	0.993	1.437	1.444	1.431	1.08333	1.43733	1.32677	0.407917	0.0151996	yes	up
A0A0P0VP27	1	1.075	1.155	1.483	1.497	1.462	1.07667	1.48067	1.37523	0.459675	0.000918683	yes	up
Q10NB4	1	1.219	0.996	1.337	1.241	1.357	1.07167	1.31167	1.22395	0.291545	0.0428179	yes	up
Q60EV1	1	1.037	1.012	1.315	1.245	1.514	1.01633	1.358	1.33618	0.41811	0.0136728	yes	up
Q5VMI1	1	0.851	0.716	1.086	1.178	1.381	0.855667	1.215	1.41995	0.505836	0.0398365	yes	up
Q60EJ0	1	1.091	0.962	1.166	1.198	1.316	1.01767	1.22667	1.20537	0.269478	0.0246688	yes	up
Q7EZ93	1	1.085	1.098	1.5	1.4	1.648	1.061	1.516	1.42884	0.514845	0.00436806	yes	up
Q2QPW9	1	0.919	0.981	1.324	1.131	1.244	0.966667	1.233	1.27552	0.351082	0.0120676	yes	up
Q6H536	1	0.986	1.002	1.124	1.305	1.224	0.996	1.21767	1.22256	0.289902	0.0135296	yes	up
Q2R432	1	0.89	0.811	3.294	2.975	4.482	0.900333	3.58367	3.98038	1.99291	0.00436459	yes	up
Q6L4R9	1	1.083	0.919	1.218	1.146	1.24	1.00067	1.20133	1.20053	0.263675	0.022059	yes	up
Q10CW7	1	1.021	0.97	1.188	1.246	1.241	0.997	1.225	1.22869	0.297116	0.000656449	yes	up
A0A0P0UYZ1	1	1.038	0.995	1.339	1.156	1.407	1.011	1.30067	1.28652	0.363468	0.0190556	yes	up
A0A0P0V256	1	0.975	0.98	1.303	1.281	1.424	0.985	1.336	1.35635	0.439724	0.00147077	yes	up
Q0DUS0	1	0.935	1.078	1.231	1.275	1.217	1.00433	1.241	1.23565	0.305265	0.00619759	yes	up
Q6ZFJ3	1	1.139	1.174	1.544	1.4	1.759	1.10433	1.56767	1.41956	0.505443	0.0167055	yes	up
A0A0P0XN73	1	1.06	0.957	1.313	1.221	1.384	1.00567	1.306	1.29864	0.377003	0.00577569	yes	up
A0A0P0VBK7	1	1.016	0.995	1.349	1.133	1.345	1.00367	1.27567	1.27101	0.345971	0.0191423	yes	up
Q6Z9J1	1	1.054	1.035	1.288	1.221	1.292	1.02967	1.267	1.2305	0.299239	0.00105272	yes	up
Q10PC3	1	0.862	0.752	1.2	1.293	1.421	0.871333	1.30467	1.49732	0.582385	0.0107788	yes	up
A0A0P0VIH5	1	1.079	0.995	1.29	1.247	1.402	1.02467	1.313	1.28139	0.357712	0.00577648	yes	up
Q7XTV6	1	1.072	1.092	1.329	1.215	1.374	1.05467	1.306	1.23831	0.308368	0.0102306	yes	up
A0A0P0XUJ0	1	1.163	0.958	1.633	1.544	1.578	1.04033	1.585	1.52355	0.607437	0.00129459	yes	up
Q658H5	1	0.918	0.845	1.19	1.223	1.411	0.921	1.27467	1.384	0.468847	0.0125727	yes	up
Q5KQP1	1	1.115	1.014	1.26	1.177	1.339	1.043	1.25867	1.20678	0.271157	0.0218572	yes	up
Q7XXN2	1	0.992	0.854	1.145	1.253	1.448	0.948667	1.282	1.35137	0.434423	0.0294974	yes	up
Q9FXQ3	1	0.99	0.824	1.795	1.605	1.629	0.938	1.67633	1.78714	0.837649	0.000867033	yes	up
Q5I396	1	1.031	0.943	1.44	1.223	1.614	0.991333	1.42567	1.43813	0.524195	0.0200458	yes	up
A0A0N7KQA7	1	1.123	1.054	1.493	1.306	1.62	1.059	1.473	1.39093	0.476055	0.0133803	yes	up
Q5Z7P1	1	1.034	0.869	1.26	1.3	1.333	0.967667	1.29767	1.34103	0.423338	0.00376695	yes	up
Q6Z4S6	1	1.134	1.058	1.287	1.321	1.363	1.064	1.32367	1.24405	0.315042	0.00433125	yes	up
Q10RH2	1	1.035	0.939	1.236	1.107	1.315	0.991333	1.21933	1.22999	0.29865	0.0269422	yes	up
Q6AVA8	1	1.052	0.899	1.237	1.106	1.338	0.983667	1.227	1.24737	0.318894	0.0394823	yes	up
Q6EUN0	1	0.986	0.995	1.409	1.398	1.432	0.993667	1.413	1.42201	0.507928	2.65e-06	yes	up
A0A0P0W4U5	1	1.31	0.879	1.7	1.519	1.597	1.063	1.60533	1.51019	0.594731	0.0173654	yes	up
Q7F8S5	1	1.03	0.999	1.34	1.163	1.22	1.00967	1.241	1.22912	0.297624	0.0121301	yes	up
Q688U3	1	0.975	1.087	1.296	1.242	1.205	1.02067	1.24767	1.2224	0.289721	0.00618134	yes	up
Q0D3X9	1	1.093	1.122	1.3	1.271	1.421	1.07167	1.33067	1.24168	0.312293	0.0116871	yes	up
Q5TKF1	1	1.039	1.09	1.279	1.251	1.42	1.043	1.31667	1.26238	0.336151	0.0094206	yes	up
Q10BA4	1	1.115	0.964	1.313	1.331	1.39	1.02633	1.34467	1.31017	0.389749	0.00338905	yes	up
A0A0P0XQG2	1	1.041	0.774	1.826	1.814	1.89	0.938333	1.84333	1.96448	0.974145	0.000467458	yes	up
Q5Z9Q8	1	1.008	0.966	1.229	1.197	1.349	0.991333	1.25833	1.26933	0.344072	0.00512393	yes	up
Q2QM48	1	1.097	1.089	1.483	1.577	1.662	1.062	1.574	1.48211	0.567652	0.00105633	yes	up
A0A0P0W604	1	0.963	0.922	2.579	2.007	3.061	0.961667	2.549	2.65061	1.40632	0.00653204	yes	up
Q60DW3	1	1.052	0.884	1.34	1.27	1.449	0.978667	1.353	1.38249	0.467272	0.00650708	yes	up
Q0IXI6	1	1.012	1.049	1.298	1.165	1.276	1.02033	1.24633	1.2215	0.288649	0.0066561	yes	up
A0A0P0VQR0	1	0.967	0.921	1.341	1.33	1.344	0.962667	1.33833	1.39024	0.475329	8.66e-05	yes	up
Q84SC5	1	0.88	0.92	1.169	1.224	1.297	0.933333	1.23	1.31786	0.398194	0.00440236	yes	up
Q6ZD92	1	1.118	1.064	1.602	1.473	1.627	1.06067	1.56733	1.47769	0.563341	0.000987454	yes	up
Q94EF2	1	1.141	1.027	1.338	1.261	1.393	1.056	1.33067	1.2601	0.333539	0.00891829	yes	up
A0A0P0WP57	1	1.147	1.004	1.425	1.455	1.373	1.05033	1.41767	1.34973	0.432671	0.00243243	yes	up
Q7XDA3	1	0.97	0.849	1.135	1.132	1.162	0.939667	1.143	1.21639	0.282604	0.0125022	yes	up
Q5ZEM9	1	1.037	0.924	1.523	1.369	1.682	0.987	1.52467	1.54475	0.627372	0.00504404	yes	up
Q337R2	1	0.934	0.946	1.313	1.129	1.088	0.96	1.17667	1.22569	0.293599	0.0397464	yes	up
Q6ATX4	1	1.156	1.073	1.431	1.365	1.536	1.07633	1.444	1.34159	0.423946	0.00541674	yes	up
Q10RJ4	1	1.122	1.179	1.384	1.359	1.566	1.10033	1.43633	1.30536	0.38445	0.0160803	yes	up
Q0E0T0	1	1.266	0.731	1.6	1.722	1.588	0.999	1.63667	1.6383	0.712204	0.0164171	yes	up
B7F9Q5	1	1.058	1.035	1.355	1.221	1.38	1.031	1.31867	1.27902	0.355036	0.00527728	yes	up
Q6Z343	1	1.01	0.932	1.177	1.119	1.264	0.980667	1.18667	1.21006	0.27508	0.0134104	yes	up
Q94H83	1	1.071	1.06	1.71	1.681	1.765	1.04367	1.71867	1.64676	0.719629	3.4e-05	yes	up
Q337E2	1	1.054	0.957	1.492	1.217	1.679	1.00367	1.46267	1.45732	0.543321	0.0286079	yes	up
Q6AUG0	1	1.06	1.164	1.728	1.455	1.411	1.07467	1.53133	1.42494	0.510899	0.0142941	yes	up
Q6K271	1	1.03	0.9	1.198	1.203	1.188	0.976667	1.19633	1.22491	0.292681	0.005141	yes	up
Q6ESZ1	1	1.255	1.17	1.83	1.758	1.817	1.14167	1.80167	1.5781	0.658191	0.00107778	yes	up
Q69K05	1	1.027	0.957	1.511	1.492	1.485	0.994667	1.496	1.50402	0.588825	2.12e-05	yes	up
Q7XRN9	1	1.05	0.837	1.243	1.228	1.445	0.962333	1.30533	1.35643	0.43981	0.0225697	yes	up
Q2R2Z2	1	0.89	0.901	1.356	1.288	1.417	0.930333	1.35367	1.45503	0.541053	0.00115921	yes	up
A0A0P0XYL0	1	1.065	0.952	1.221	1.118	1.299	1.00567	1.21267	1.20583	0.270031	0.0285854	yes	up
Q6L4Z4	1	1.05	0.916	1.374	1.352	1.55	0.988667	1.42533	1.44167	0.527743	0.00409662	yes	up
Q688J5	1	1.104	0.924	1.229	1.364	1.417	1.00933	1.33667	1.32431	0.405237	0.0128653	yes	up
Q6K7R9	1	0.94	0.999	1.861	1.831	2.013	0.979667	1.90167	1.94114	0.956902	0.000102763	yes	up
Q9LGR1	1	1.535	1.014	1.82	1.77	1.908	1.183	1.83267	1.54917	0.631494	0.022817	yes	up
B9GCH9	1	1.041	0.908	1.255	1.221	1.392	0.983	1.28933	1.31163	0.391362	0.00942205	yes	up
Q7XKE1	1	1.052	1.046	1.515	1.384	1.524	1.03267	1.47433	1.4277	0.513688	0.00078313	yes	up
Q6K5Q1	1	1.021	0.937	1.208	1.312	1.255	0.986	1.25833	1.2762	0.351855	0.00226739	yes	up
Q93W00	1	1.073	1.046	1.365	1.324	1.536	1.03967	1.40833	1.3546	0.437868	0.00570951	yes	up
Q6K700	1	1.172	0.96	1.425	1.304	1.584	1.044	1.43767	1.37708	0.461608	0.0193092	yes	up
Q5Z9Z5	1	1.301	0.83	1.595	1.511	1.676	1.04367	1.594	1.52731	0.610991	0.0194893	yes	up
C7J464	1	1.007	0.985	1.582	1.433	1.638	0.997333	1.551	1.55515	0.637051	0.000843797	yes	up
Q6EQ14	1	1.009	0.98	1.222	1.269	1.191	0.996333	1.22733	1.23185	0.300827	0.000676979	yes	up
Q7XK44	1	1.012	0.997	1.274	1.24	1.472	1.003	1.32867	1.32469	0.405658	0.0108795	yes	up
Q7XVN8	1	1.069	0.972	1.424	1.334	1.554	1.01367	1.43733	1.41795	0.503811	0.00377277	yes	up
Q10E16	1	1.034	0.949	1.264	1.29	1.337	0.994333	1.297	1.30439	0.383377	0.000753692	yes	up
Q6ZBH4	1	1.026	1.013	1.409	1.349	1.5	1.013	1.41933	1.40112	0.486579	0.000800417	yes	up
Q7XVN7	1	0.998	0.942	1.294	1.251	1.537	0.98	1.36067	1.38844	0.47346	0.013905	yes	up
Q69XZ5	1	1.059	0.923	1.548	1.512	1.611	0.994	1.557	1.5664	0.647451	0.000323926	yes	up
Q7F2Z1	1	1.149	0.949	1.331	1.445	1.626	1.03267	1.46733	1.42092	0.506822	0.0142748	yes	up
Q5TKG1	1	0.939	1.025	1.223	1.245	1.174	0.988	1.214	1.22874	0.297185	0.0023942	yes	up
A0A0P0XX67	1	0.896	0.972	1.403	1.254	1.58	0.956	1.41233	1.47734	0.562998	0.0100348	yes	up
Q7X923	1	0.839	0.854	1.097	1.148	1.05	0.897667	1.09833	1.22354	0.291064	0.0267175	yes	up
Q2QWJ7	1	0.964	0.924	1.226	1.091	1.332	0.962667	1.21633	1.2635	0.33743	0.0255927	yes	up
Q654V6	1	1.516	1.22	1.749	1.616	1.771	1.24533	1.712	1.37473	0.459151	0.041154	yes	up
A0A0P0VL78	1	1.021	0.991	1.581	1.44	1.676	1.004	1.56567	1.55943	0.641018	0.00124823	yes	up
A0A0N7KN54	1	1.052	1.027	1.569	1.398	1.442	1.02633	1.46967	1.43196	0.51799	0.00115105	yes	up
Q6ZIQ1	1	1.15	1.006	1.376	1.26	1.357	1.052	1.331	1.26521	0.339376	0.0101049	yes	up
Q40680	1	1.124	0.998	1.338	1.21	1.212	1.04067	1.25333	1.20436	0.268262	0.0231681	yes	up
Q2QNB5	1	1.153	1.002	1.27	1.288	1.571	1.05167	1.37633	1.30872	0.388152	0.0417448	yes	up
Q7XPL3	1	1.114	1.017	1.748	1.559	1.934	1.04367	1.747	1.67391	0.743219	0.00349662	yes	up
Q75I90	1	1.138	0.926	1.313	1.294	1.366	1.02133	1.32433	1.29667	0.374812	0.00996855	yes	up
Q69SU7	1	0.968	0.952	1.25	1.199	1.431	0.973333	1.29333	1.32877	0.410088	0.0111826	yes	up
Q2QXY9	1	1.189	0.854	1.395	1.335	1.428	1.01433	1.386	1.36641	0.450395	0.0210167	yes	up
Q6L4S3	1	0.986	0.914	1.122	1.132	1.251	0.966667	1.16833	1.20862	0.273362	0.0149272	yes	up
Q688Y5	1	0.974	0.945	1.249	1.197	1.409	0.973	1.285	1.32066	0.401257	0.00899726	yes	up
Q7XI22	1	1.121	1.143	1.449	1.455	1.586	1.088	1.49667	1.37561	0.460074	0.00291934	yes	up
Q53PP7	1	1.068	1.316	1.78	1.608	1.982	1.128	1.79	1.58688	0.666193	0.0101923	yes	up
Q5ZAN2	1	1.084	0.976	1.288	1.15	1.28	1.02	1.23933	1.21503	0.280995	0.01672	yes	up
Q0J035	1	0.957	0.918	1.11	1.166	1.227	0.958333	1.16767	1.21843	0.285029	0.00711167	yes	up
A0A0P0VV16	1	0.963	1.043	1.328	1.185	1.486	1.002	1.333	1.33034	0.411794	0.0212059	yes	up
Q7XQR9	1	1.079	0.976	1.251	1.198	1.341	1.01833	1.26333	1.24059	0.311025	0.00926623	yes	up
Q7XTF0	1	1.243	1.168	1.628	1.483	1.601	1.137	1.57067	1.38141	0.466145	0.00683319	yes	up
A0A0P0Y9R2	1	0.82	0.779	1.019	1.251	1.249	0.866333	1.173	1.35398	0.437209	0.0404328	yes	up
Q60ES2	1	1.112	0.978	1.403	1.41	1.615	1.03	1.476	1.43301	0.519048	0.00529882	yes	up
Q7X711	1	1.099	0.846	1.19	1.244	1.257	0.981667	1.23033	1.25331	0.325744	0.0312496	yes	up
Q0DAD7	1	1.131	0.895	1.311	1.156	1.281	1.00867	1.24933	1.2386	0.308709	0.0443583	yes	up
Q6Z1H3	1	1.079	1.125	1.68	1.387	1.728	1.068	1.59833	1.49657	0.581657	0.00925446	yes	up
Q5W6N1	1	1.155	0.915	1.581	1.289	1.506	1.02333	1.45867	1.42541	0.511374	0.0178713	yes	up
A0A0P0W185	1	1.176	1.085	1.457	1.245	1.508	1.087	1.40333	1.29102	0.368506	0.0293181	yes	up
Q10MY9	1	1.065	0.991	1.208	1.542	1.404	1.01867	1.38467	1.35929	0.442857	0.0213483	yes	up
Q5ZC69	1	1.354	1.217	1.783	1.764	1.65	1.19033	1.73233	1.45533	0.541351	0.00817224	yes	up
Q5JNI5	1	1.163	1.119	1.318	1.417	1.455	1.094	1.39667	1.27666	0.352375	0.00888468	yes	up
Q6H5G6	1	1.065	0.992	1.355	1.286	1.413	1.019	1.35133	1.32614	0.40723	0.00156029	yes	up
A0A0P0VNC6	1	1.043	1.152	1.317	1.237	1.296	1.065	1.28333	1.20501	0.269043	0.0129948	yes	up
Q5KQN3	1	1.122	0.967	1.304	1.265	1.454	1.02967	1.341	1.30236	0.381132	0.0138912	yes	up
Q5JK78	1	1.118	0.93	1.558	1.387	1.483	1.016	1.476	1.45276	0.538792	0.00338856	yes	up
A0A0P0V6D7	1	1.012	0.889	1.284	1.163	1.415	0.967	1.28733	1.33127	0.412798	0.0178913	yes	up
A0A0P0WJ59	1	1.069	1.282	1.693	1.431	1.59	1.117	1.57133	1.40674	0.49236	0.0163578	yes	up
Q75M67	1	0.933	0.936	1.189	1.158	1.438	0.956333	1.26167	1.31928	0.399745	0.0286953	yes	up
Q40682	1	1.177	1.001	1.555	1.404	1.802	1.05933	1.587	1.49811	0.583146	0.0153887	yes	up
Q0D412	1	1.074	0.97	1.534	1.276	1.349	1.01467	1.38633	1.36629	0.450268	0.010902	yes	up
Q10LL5	1	1.136	0.972	1.373	1.359	1.611	1.036	1.44767	1.39736	0.482705	0.0128472	yes	up
Q5VQ75	1	1.011	0.877	1.156	1.099	1.234	0.962667	1.163	1.2081	0.272743	0.0261023	yes	up
Q9SNN8	1	1.076	1.109	1.438	1.439	1.46	1.06167	1.44567	1.3617	0.445404	0.00031392	yes	up
Q7XB67	1	1.115	1.214	1.282	1.334	1.5	1.10967	1.372	1.23641	0.306154	0.0438187	yes	up
Q6ZKL8	1	1.156	1.142	1.397	1.204	1.36	1.09933	1.32033	1.20103	0.264273	0.0460348	yes	up
A0A0P0WXQ4	1	1.187	0.979	1.411	1.414	1.477	1.05533	1.434	1.35881	0.442346	0.00551942	yes	up
Q6K9M2	1	0.997	0.919	1.107	1.205	1.274	0.972	1.19533	1.22977	0.298385	0.0155572	yes	up
A0A0N7KN09	1	1.029	1.055	1.247	1.256	1.237	1.028	1.24667	1.21271	0.278236	0.000201361	yes	up
Q5N770	1	0.986	0.938	1.452	1.366	1.721	0.974667	1.513	1.55233	0.634431	0.00771182	yes	up
Q2QN76	1	1.033	0.95	1.222	1.182	1.269	0.994333	1.22433	1.23131	0.300195	0.00272985	yes	up
Q6L529	1	1.949	1.335	2.349	2.228	2.187	1.428	2.25467	1.5789	0.658918	0.042794	yes	up
Q0JDT2	1	0.951	0.893	1.319	1.388	1.484	0.948	1.397	1.47363	0.559373	0.00140106	yes	up
Q6Z0G0	1	1.108	0.948	1.482	1.4	1.31	1.01867	1.39733	1.37173	0.455994	0.00522195	yes	up
Q53KV7	1	0.996	0.964	1.294	1.262	1.36	0.986667	1.30533	1.32297	0.403784	0.000506299	yes	up
Q651A9	1	1.479	1.094	1.797	1.645	1.978	1.191	1.80667	1.51693	0.601157	0.0246338	yes	up
A0A0P0X1R2	1	1.2	0.985	1.421	1.492	1.493	1.06167	1.46867	1.38336	0.468176	0.00514485	yes	up
Q6ZI44	1	1.136	0.896	1.335	1.353	1.381	1.01067	1.35633	1.34202	0.424405	0.00813258	yes	up
Q2QLM6	1	1.033	0.965	1.321	1.223	1.623	0.999333	1.389	1.38993	0.475009	0.0330587	yes	up
Q5NAL3	1	0.966	0.935	2.508	2.467	2.184	0.967	2.38633	2.46777	1.30321	0.000164254	yes	up
Q2QXD6	1	1.009	0.808	1.471	1.31	1.478	0.939	1.41967	1.51189	0.596355	0.00491926	yes	up
A0A0P0WB35	1	1.096	1.074	1.412	1.32	1.424	1.05667	1.38533	1.31104	0.390713	0.00169392	yes	up
Q653S1	1	1.026	0.979	1.54	1.36	1.665	1.00167	1.52167	1.51913	0.60325	0.00437758	yes	up
B7ERE7	1	1.017	0.95	1.172	1.145	1.306	0.989	1.20767	1.2211	0.28818	0.0151869	yes	up
A0A0P0X662	1	1.07	1.014	1.287	1.259	1.411	1.028	1.319	1.28307	0.359604	0.00478758	yes	up
Q5W770	1	0.89	0.829	1.344	1.526	1.498	0.906333	1.456	1.60647	0.683897	0.0018943	yes	up
Q5JN42	1	0.928	1.018	1.197	1.123	1.428	0.982	1.24933	1.27223	0.347364	0.0494009	yes	up
Q0J9B4	1	0.83	0.916	1.235	1.164	1.328	0.915333	1.24233	1.35725	0.440683	0.00872076	yes	up
Q84QC0	1	1.036	0.922	1.32	1.086	1.24	0.986	1.21533	1.23259	0.301693	0.0399759	yes	up
A0A0P0YBA4	1	1.119	0.967	1.438	1.307	1.484	1.02867	1.40967	1.37038	0.454578	0.00561866	yes	up
A0A0P0XAR4	1	1.2	0.96	1.831	1.452	1.939	1.05333	1.74067	1.65253	0.724678	0.0141593	yes	up
Q6EP35	1	0.937	1.011	1.252	1.261	1.287	0.982667	1.26667	1.28901	0.366263	0.000360297	yes	up
Q10A81	1	0.967	0.879	1.197	1.133	1.228	0.948667	1.186	1.25018	0.322131	0.0065348	yes	up
A0A0P0VK79	1	1.248	1.118	1.451	1.404	1.617	1.122	1.49067	1.32858	0.409885	0.0187431	yes	up
Q7XAK8	1	0.88	0.794	1.131	1.136	1.194	0.891333	1.15367	1.29432	0.372189	0.0141484	yes	up
Q6K832	1	1.066	0.921	1.22	1.206	1.343	0.995667	1.25633	1.2618	0.335485	0.0125059	yes	up
A0A0P0VUJ4	1	0.811	1.085	1.53	1.275	1.451	0.965333	1.41867	1.46961	0.555437	0.0148762	yes	up
Q5N6Y9	1	0.965	0.882	1.285	1.205	1.317	0.949	1.269	1.3372	0.419212	0.00269381	yes	up
Q69M01	1	1.087	1.029	1.26	1.228	1.288	1.03867	1.25867	1.21181	0.277164	0.00205596	yes	up
Q7XI49	1	1.089	1.107	1.443	1.372	1.551	1.06533	1.45533	1.36608	0.450045	0.00319777	yes	up
Q6EUP4	1	1.155	1.073	1.291	1.357	1.241	1.076	1.29633	1.20477	0.268759	0.0170091	yes	up
A0A0P0WSW0	1	1.096	0.902	1.379	1.259	1.612	0.999333	1.41667	1.41761	0.503462	0.0239501	yes	up
Q0DUA4	1	0.979	1.146	4.715	5.074	4.784	1.04167	4.85767	4.66336	2.22137	6.2e-06	yes	up
Q8H085	1	0.987	0.943	1.12	1.17	1.227	0.976667	1.17233	1.20034	0.263445	0.00523166	yes	up
Q5VM82	1	1.1	1.261	1.548	1.335	1.421	1.12033	1.43467	1.28057	0.356788	0.0326856	yes	up
Q5N8K0	1	1.047	1.068	1.33	1.329	1.357	1.03833	1.33867	1.28925	0.366527	0.000169614	yes	up
Q10EK0	1	1.182	0.962	1.769	1.432	2.276	1.048	1.82567	1.74205	0.800785	0.0378211	yes	up
Q69P90	1	1.176	1.138	1.514	1.561	1.467	1.10467	1.514	1.37055	0.454754	0.00240791	yes	up
Q5JJI4	1	1.216	0.95	1.477	1.478	1.752	1.05533	1.569	1.48673	0.572147	0.0138142	yes	up
Q94DS3	1	1.103	1.052	1.375	1.347	1.31	1.05167	1.344	1.27797	0.353856	0.00114698	yes	up
Q5QLF6	1	1.153	1.001	1.268	1.177	1.392	1.05133	1.279	1.21655	0.282796	0.0472887	yes	up
Q0DSY0	1	1.107	0.904	1.259	1.288	1.472	1.00367	1.33967	1.33477	0.416594	0.0193729	yes	up
Q5ZCC0	1	1.109	1.077	1.642	1.452	1.86	1.062	1.65133	1.55493	0.636848	0.00851359	yes	up
Q5Z4M6	1	1.097	1.001	1.516	1.455	1.618	1.03267	1.52967	1.48128	0.566843	0.000979285	yes	up
Q6Z528	1	1.01	0.834	1.208	1.198	1.112	0.948	1.17267	1.23699	0.306834	0.0255239	yes	up
Q10RU8	1	0.94	0.938	1.168	1.207	1.157	0.959333	1.17733	1.22724	0.295419	0.00100856	yes	up
Q6Z6R6	1	1	0.959	1.092	1.337	1.29	0.986333	1.23967	1.25684	0.329805	0.0293765	yes	up
Q68Y36	1	1.04	0.932	1.536	1.323	1.555	0.990667	1.47133	1.4852	0.570653	0.00400164	yes	up
A0A0P0W719	1	1.109	1.031	1.336	1.247	1.443	1.04667	1.342	1.28217	0.358583	0.0106263	yes	up
Q5VPM1	1	0.964	0.831	1.113	1.167	1.191	0.931667	1.157	1.24186	0.312503	0.0161301	yes	up
A0A0P0XQ33	1	0.992	1.172	1.367	1.353	1.542	1.05467	1.42067	1.34703	0.429781	0.0123472	yes	up
Q5ZCG4	1	1.082	0.81	1.384	1.159	1.452	0.964	1.33167	1.3814	0.466128	0.0372361	yes	up
Q5W769	1	0.859	0.82	1.735	1.625	2.548	0.893	1.96933	2.2053	1.14098	0.0220759	yes	up
Q6H657	1	1.105	1.091	1.361	1.246	1.5	1.06533	1.369	1.28504	0.361818	0.0195442	yes	up
Q688X7	1	1.358	1.113	1.977	1.732	2.297	1.157	2.002	1.73034	0.791053	0.0122609	yes	up
Q6AT58	1	0.938	0.885	1.198	1.226	1.437	0.941	1.287	1.36769	0.451745	0.0137232	yes	up
A0A0N7KI38	1	1.23	0.924	1.47	1.411	1.486	1.05133	1.45567	1.38459	0.46946	0.0129879	yes	up
Q5QLQ9	1	1.147	1.041	1.41	1.309	1.345	1.06267	1.35467	1.27478	0.350249	0.00523605	yes	up
Q8LQM2	1	0.98	0.803	1.184	1.112	1.175	0.927667	1.157	1.24722	0.31871	0.0261759	yes	up
Q5JJJ8	1	1.073	1.143	1.636	1.994	1.873	1.072	1.83433	1.71113	0.774951	0.00251267	yes	up
A0A0P0WZF6	1	1.086	1.005	1.219	1.188	1.32	1.03033	1.24233	1.20576	0.269941	0.0120674	yes	up
Q5JMX3	1	1.166	1.338	2.049	1.834	2.377	1.168	2.08667	1.78653	0.83716	0.00776256	yes	up
Q6Z7B0	1	1.165	1.014	1.643	1.426	1.631	1.05967	1.56667	1.47845	0.564088	0.00450812	yes	up
Q6AUH9	1	0.811	0.851	1.512	1.603	2.369	0.887333	1.828	2.06011	1.04272	0.0276253	yes	up
A0A0N7KJ06	1	1.205	0.98	1.656	1.717	1.676	1.06167	1.683	1.58524	0.664704	0.00110707	yes	up
Q0J0H9	1	0.586	1.061	1.357	1.248	1.666	0.882333	1.42367	1.61352	0.690216	0.0498509	yes	up
Q2R4Z4	1	0.991	0.947	2.982	2.774	3.958	0.979333	3.238	3.30633	1.72523	0.00347808	yes	up
Q0DY26	1	1.13	1.014	1.515	1.336	1.421	1.048	1.424	1.35878	0.44231	0.00471755	yes	up
Q67V39	1	1.223	1.117	1.429	1.384	1.366	1.11333	1.393	1.2512	0.32331	0.0140341	yes	up
Q5KQI2	1	1.104	1.011	1.303	1.143	1.314	1.03833	1.25333	1.20706	0.2715	0.028813	yes	up
Q6Z7V2	1	0.88	0.877	1.439	1.194	1.532	0.919	1.38833	1.5107	0.595217	0.0124475	yes	up
A0A0P0Y9M7	1	1.229	1.033	1.354	1.316	1.602	1.08733	1.424	1.30963	0.389155	0.0425612	yes	up
Q84JI0	1	0.854	1.085	1.38	1.178	1.395	0.979667	1.31767	1.34502	0.427623	0.025403	yes	up
Q653U9	1	1.074	0.936	1.407	1.287	1.538	1.00333	1.41067	1.40598	0.491576	0.00790661	yes	up
Q10MD7	1	1.078	0.813	1.298	1.211	1.45	0.963667	1.31967	1.36942	0.453567	0.0276529	yes	up
A0A0P0VGR0	1	1.047	0.904	1.494	1.267	1.384	0.983667	1.38167	1.40461	0.490168	0.00693399	yes	up
Q7X745	1	0.905	0.7	1.434	1.562	1.326	0.868333	1.44067	1.65912	0.730416	0.0068792	yes	up
Q10MJ1	1	0.972	0.959	1.202	1.232	1.228	0.977	1.22067	1.2494	0.321239	9.14e-05	yes	up
Q5ZBT1	1	1.036	1.023	1.338	1.22	1.267	1.01967	1.275	1.25041	0.3224	0.00205992	yes	up
Q0ITY8	1	1.155	1.091	1.373	1.289	1.469	1.082	1.377	1.27264	0.347828	0.0127359	yes	up
Q5JK68	1	1.196	0.895	1.653	1.58	1.516	1.03033	1.583	1.5364	0.61955	0.00463244	yes	up
Q0DT06	1	1.12	1.184	1.638	1.799	1.924	1.10133	1.787	1.62258	0.698288	0.00226374	yes	up
Q6K6X2	1	1.12	1.126	1.567	1.53	1.518	1.082	1.53833	1.42175	0.507668	0.000471199	yes	up
Q0IXM4	1	1.1	1.021	1.777	1.502	1.799	1.04033	1.69267	1.62704	0.702252	0.0028813	yes	up
Q0J0U2	1	1.008	0.917	1.258	1.093	1.281	0.975	1.21067	1.24171	0.312328	0.0233248	yes	up
Q10GG7	1	1.128	1.139	1.719	1.339	1.697	1.089	1.585	1.45546	0.541479	0.0193287	yes	up
Q6YW53	1	0.967	1.007	1.171	1.16	1.291	0.991333	1.20733	1.21789	0.284382	0.00781947	yes	up
Q94GF4	1	1.358	1.133	1.463	1.517	1.456	1.16367	1.47867	1.2707	0.345619	0.0413491	yes	up
Q69IL7	1	0.971	0.925	1.281	1.26	1.341	0.965333	1.294	1.34047	0.422739	0.000547549	yes	up
Q9FNZ8	1	0.938	1.149	1.198	1.24	1.366	1.029	1.268	1.23226	0.301312	0.0410759	yes	up
Q6K741	1	1.02	0.907	1.4	1.219	1.358	0.975667	1.32567	1.35873	0.442258	0.00569853	yes	up
Q8W3C9	1	0.995	0.865	1.207	1.119	1.297	0.953333	1.20767	1.26678	0.34117	0.0199003	yes	up
Q6YZI5	1	1.205	0.896	1.864	1.415	1.931	1.03367	1.73667	1.6801	0.74855	0.0193382	yes	up
A0A0N7KCJ7	1	1.132	0.903	1.149	1.388	1.373	1.01167	1.30333	1.2883	0.365472	0.0457852	yes	up
Q67WN8	1	1.272	1.135	1.961	1.833	2.26	1.13567	2.018	1.77693	0.829387	0.00406402	yes	up
Q6YYJ6	1	1.164	0.95	2.128	1.611	2.24	1.038	1.993	1.92004	0.941135	0.00947271	yes	up
Q10E42	1	1.04	0.936	1.612	1.466	1.409	0.992	1.49567	1.50773	0.592377	0.00173473	yes	up
Q6YWQ4	1	1.057	1.003	1.261	1.181	1.374	1.02	1.272	1.24706	0.31853	0.0129148	yes	up
A0A0P0XLI9	1	0.892	0.861	1.257	1.11	1.509	0.917667	1.292	1.40792	0.493564	0.039102	yes	up
Q8H4V1	1	1.171	1.084	1.566	1.491	1.631	1.085	1.56267	1.44025	0.526315	0.00170415	yes	up
Q7XX94	1	0.866	0.895	6.387	5.852	5.705	0.920333	5.98133	6.49909	2.70024	1.8e-05	yes	up
Q7EYN1	1	0.918	1.032	1.435	1.48	1.2	0.983333	1.37167	1.39492	0.480177	0.0140754	yes	up
A0A0P0VPT6	1	0.988	1.116	1.663	1.283	1.785	1.03467	1.577	1.52416	0.608017	0.0257291	yes	up
Q0DVU4	1	1.151	0.78	1.564	1.253	1.49	0.977	1.43567	1.46946	0.55529	0.0325494	yes	up
A0A0P0Y808	1	1.245	1.125	1.547	1.731	1.443	1.12333	1.57367	1.40089	0.486344	0.0149115	yes	up
Q5Z880	1	0.88	0.86	1.368	1.208	1.437	0.913333	1.33767	1.4646	0.550505	0.00626016	yes	up
A0A0P0Y7V1	1	1.127	1.041	1.499	1.339	1.737	1.056	1.525	1.44413	0.530199	0.018161	yes	up
Q67VC7	1	1.063	0.985	1.942	1.832	2.17	1.016	1.98133	1.95013	0.963571	0.000704911	yes	up
Q0JBE1	1	1.147	0.88	1.489	1.174	1.556	1.009	1.40633	1.39379	0.479012	0.0477503	yes	up
Q6YVY6	1	0.936	1.03	1.391	1.186	1.431	0.988667	1.336	1.35131	0.434364	0.0126527	yes	up
A0A0P0W2T4	1	1.191	1.087	1.486	1.436	1.793	1.09267	1.57167	1.43838	0.524442	0.0183498	yes	up
Q2QQS1	1	0.947	0.873	1.681	1.313	1.679	0.94	1.55767	1.65709	0.728654	0.00843269	yes	up
P09229	1	1.061	1.1	1.307	1.3	1.259	1.05367	1.28867	1.22303	0.290461	0.00199164	yes	up
Q5JMT5	1	0.942	0.922	1.871	1.93	2.128	0.954667	1.97633	2.07018	1.04976	0.000229272	yes	up
Q7XIK5	1	1.011	1.078	1.224	1.202	1.345	1.02967	1.257	1.22078	0.287807	0.0109567	yes	up
Q2QM93	1	1.062	0.977	1.294	1.204	1.433	1.013	1.31033	1.29352	0.3713	0.0140172	yes	up
Q6Z441	1	0.832	0.987	1.512	1.295	1.726	0.939667	1.511	1.60802	0.685283	0.0135558	yes	up
Q84Z87	1	1.023	0.998	1.309	1.229	1.306	1.007	1.28133	1.27243	0.347582	0.000557948	yes	up
Q2RAL9	1	0.85	0.812	1.108	1.184	1.194	0.887333	1.162	1.30954	0.389062	0.012388	yes	up
Q6YUV4	1	1.23	1.08	1.564	1.33	1.489	1.10333	1.461	1.32417	0.405087	0.0206876	yes	up
Q6K2L9	1	1.204	0.98	1.668	1.58	1.694	1.06133	1.64733	1.55214	0.634255	0.00180056	yes	up
Q7XI96	1	1.017	0.925	1.144	1.226	1.238	0.980667	1.20267	1.22638	0.294402	0.00557821	yes	up
Q0D519	1	1.085	0.984	1.471	1.322	1.402	1.023	1.39833	1.36689	0.450902	0.0021364	yes	up
Q8H9E4	1	1.156	0.942	1.336	1.309	1.354	1.03267	1.333	1.29083	0.368302	0.00999562	yes	up
Q6ZJR4	1	1.142	0.74	1.325	1.348	1.532	0.960667	1.40167	1.45906	0.545035	0.0306763	yes	up
A0A0P0W3C8	1	1.167	1.127	1.48	1.235	1.582	1.098	1.43233	1.30449	0.383489	0.0433721	yes	up
Q0JPH5	1	1.033	0.959	1.276	1.272	1.43	0.997333	1.326	1.32955	0.410933	0.00427645	yes	up
Q5Z6P9	1	0.924	0.929	1.301	1.142	1.314	0.951	1.25233	1.31686	0.397101	0.00759175	yes	up
Q0DPL9	1	0.925	0.911	1.623	1.201	1.292	0.945333	1.372	1.45134	0.537385	0.0312885	yes	up
Q0DY90	1	0.815	0.84	1.04	1.137	1.085	0.885	1.08733	1.22863	0.297045	0.0347412	yes	up
Q69RI8	1	1.075	0.976	1.673	1.559	1.784	1.017	1.672	1.64405	0.717255	0.000787008	yes	up
Q336W9	1	0.977	0.817	1.317	1.23	1.234	0.931333	1.26033	1.35326	0.436436	0.00684809	yes	up
Q0J5A8	1	0.943	1.13	1.992	1.847	2.051	1.02433	1.96333	1.91669	0.93862	0.000332994	yes	up
Q0JD43	1	1.119	1.048	1.537	1.444	1.682	1.05567	1.55433	1.47237	0.558142	0.00298594	yes	up
Q7Y0B7	1	1.182	0.852	1.903	1.287	1.721	1.01133	1.637	1.61866	0.694796	0.0385833	yes	up
B9FR93	1	0.886	0.936	1.146	1.191	1.06	0.940667	1.13233	1.20376	0.267543	0.019364	yes	up
Q336P5	1	1.025	0.982	1.428	1.309	1.574	1.00233	1.437	1.43365	0.519698	0.00499674	yes	up
Q6ZBR2	1	1.092	1.026	1.359	1.388	1.398	1.03933	1.38167	1.32938	0.410751	0.000326719	yes	up
Q7XVM5	1	1.046	1.08	1.267	1.44	1.452	1.042	1.38633	1.33045	0.411919	0.00580188	yes	up
Q0D5G4	1	1.237	1.086	1.658	1.473	1.471	1.10767	1.534	1.38489	0.469775	0.0101376	yes	up
A0A0P0VP17	1	1.062	0.919	1.443	1.356	1.472	0.993667	1.42367	1.43274	0.518778	0.00135881	yes	up
A0A0P0WE19	1	0.865	1.112	1.312	1.281	1.508	0.992333	1.367	1.37756	0.462117	0.0204916	yes	up
Q69TZ2	1	1.001	1.033	1.395	1.321	1.328	1.01133	1.348	1.33289	0.414562	0.000203876	yes	up
Q5Z9P3	1	1.255	1.179	1.653	1.781	1.765	1.14467	1.733	1.51398	0.598344	0.00235202	yes	up
A0A0P0XT28	1	1.013	0.93	1.227	1.275	1.389	0.981	1.297	1.32212	0.402853	0.00440535	yes	up
Q7XIR8	1	1.033	0.954	1.699	1.391	1.676	0.995667	1.58867	1.59558	0.674082	0.00430585	yes	up
Q6Z1Z8	1	1.104	1.044	1.335	1.232	1.387	1.04933	1.318	1.25604	0.328877	0.00793337	yes	up
Q0JJ01	1	1.16	0.978	1.374	1.442	1.608	1.046	1.47467	1.40982	0.495506	0.00892253	yes	up
Q0JBS2	1	1.321	1.082	1.984	1.664	2.14	1.13433	1.92933	1.70085	0.766258	0.0094725	yes	up
Q851Q6	1	0.947	1.081	1.224	1.237	1.473	1.00933	1.31133	1.29921	0.377632	0.0282374	yes	up
Q7EZC8	1	1.042	0.931	1.221	1.186	1.44	0.991	1.28233	1.29398	0.371814	0.0274033	yes	up
B7EB50	1	1.052	1.092	1.647	1.305	1.451	1.048	1.46767	1.40045	0.485886	0.0149689	yes	up
Q6AVQ3	1	1.169	1.129	1.579	1.676	1.604	1.09933	1.61967	1.47332	0.559068	0.000894473	yes	up
A0A0P0WM72	1	1.04	0.846	1.373	1.299	1.226	0.962	1.29933	1.35066	0.433663	0.00977451	yes	up
A0A0P0VRF7	1	1.044	0.962	1.195	1.269	1.443	1.002	1.30233	1.29973	0.378216	0.0177082	yes	up
A0A0P0UYG1	1	1.118	1.039	1.593	1.476	1.776	1.05233	1.615	1.53468	0.617942	0.00390806	yes	up
A0A0P0XDG3	1	1.149	1.057	0.551	0.513	0.568	1.06867	0.544	0.509046	-0.974133	0.000347216	yes	down
Q7X8W5	1	1.183	1.027	0.487	0.451	0.502	1.07	0.48	0.448598	-1.1565	0.000562316	yes	down
A0A0P0WG85	1	1.223	1.102	0.759	0.691	0.715	1.10833	0.721667	0.651128	-0.618987	0.0045875	yes	down
P16081	1	0.88	0.813	0.7	0.618	0.723	0.897667	0.680333	0.757891	-0.399938	0.0264603	yes	down
Q0DFC9	1	0.862	1.101	0.565	0.641	0.733	0.987667	0.646333	0.654404	-0.611746	0.0156731	yes	down
Q84QV5	1	0.847	0.679	0.471	0.483	0.597	0.842	0.517	0.614014	-0.703656	0.0323668	yes	down
Q7XUV4	1	1.146	1.069	0.795	0.825	0.858	1.07167	0.826	0.770762	-0.375643	0.00588843	yes	down
Q0JAK9	1	1.198	1.017	0.616	0.546	0.654	1.07167	0.605333	0.564852	-0.824055	0.00275329	yes	down
Q5WA73	1	1.066	1.311	0.502	0.482	0.565	1.12567	0.516333	0.458691	-1.12441	0.00338726	yes	down
Q7XI09	1	1.272	1.167	0.618	0.513	0.645	1.14633	0.592	0.516429	-0.953358	0.00336222	yes	down
Q7XLR1	1	1.121	1.006	0.542	0.55	0.502	1.04233	0.531333	0.509754	-0.972128	0.000263819	yes	down
Q8S3S1	1	1.183	1.031	0.415	0.389	0.452	1.07133	0.418667	0.39079	-1.35553	0.00039056	yes	down
A0A0P0X4N7	1	1.141	1.273	0.687	0.638	0.671	1.138	0.665333	0.584651	-0.774351	0.00413242	yes	down
Q8H811	1	1.162	1.096	0.8	0.766	0.832	1.086	0.799333	0.736034	-0.442155	0.00483669	yes	down
Q2QS14	1	1.257	1.285	0.827	0.795	0.85	1.18067	0.824	0.697911	-0.518885	0.0179446	yes	down
Q6I5K0	1	1.426	1.111	0.772	0.853	0.762	1.179	0.795667	0.674866	-0.567328	0.0427864	yes	down
Q84VG3	1	1.056	1.314	0.803	0.787	0.823	1.12333	0.804333	0.716024	-0.481921	0.0304981	yes	down
Q5N7H0	1	1.159	1.026	0.834	0.787	0.864	1.06167	0.828333	0.78022	-0.358048	0.0125169	yes	down
Q0DXR0	1	1.231	0.882	0.739	0.707	0.781	1.03767	0.742333	0.715387	-0.483204	0.0478026	yes	down
Q5KS50	1	1.19	1.185	0.65	0.607	0.795	1.125	0.684	0.608	-0.717857	0.00643604	yes	down
Q53JF7	1	1.231	1.01	0.902	0.834	0.84	1.08033	0.858667	0.794816	-0.331306	0.0475744	yes	down
A0A0P0VNU0	1	1.019	0.873	0.712	0.85	0.703	0.964	0.755	0.783195	-0.352557	0.034053	yes	down
Q8RZQ8	1	1.088	0.997	0.562	0.516	0.566	1.02833	0.548	0.532901	-0.90806	0.000143773	yes	down
Q5Z9S8	1	1.026	0.909	0.695	0.668	0.667	0.978333	0.676667	0.691652	-0.531881	0.00118618	yes	down
Q10L71	1	1.263	1.283	0.704	0.652	0.726	1.182	0.694	0.58714	-0.768222	0.00650106	yes	down
Q5QNI2	1	1.119	0.813	0.643	0.595	0.591	0.977333	0.609667	0.623806	-0.68083	0.0153792	yes	down
Q0DL73	1	1.262	1.026	0.473	0.413	0.502	1.096	0.462667	0.422141	-1.2442	0.00192192	yes	down
Q8H5N9	1	1.169	1.042	0.713	0.749	0.639	1.07033	0.700333	0.654313	-0.611947	0.00356341	yes	down
Q2R2B9	1	1.301	0.907	0.578	0.576	0.596	1.06933	0.583333	0.545511	-0.874319	0.0150798	yes	down
Q10A91	1	1.205	1.078	0.617	0.549	0.654	1.09433	0.606667	0.554371	-0.851076	0.00191325	yes	down
Q69X98	1	1.207	1.22	0.675	0.62	0.641	1.14233	0.645333	0.564926	-0.823867	0.00243779	yes	down
Q7XRK9	1	1.175	0.969	0.818	0.747	0.781	1.048	0.782	0.746183	-0.422398	0.0168042	yes	down
Q69JI7	1	0.993	0.917	0.791	0.686	0.797	0.97	0.758	0.781443	-0.355787	0.00907622	yes	down
Q5JLH8	1	1.252	1.07	0.756	0.67	0.82	1.10733	0.748667	0.676099	-0.564694	0.0144518	yes	down
Q652Q6	1	1.033	0.827	0.684	0.693	0.701	0.953333	0.692667	0.726573	-0.460819	0.0152417	yes	down
A0A0P0WTV3	1	1.427	1.03	0.754	0.63	0.672	1.15233	0.685333	0.594735	-0.74968	0.0304769	yes	down
B7E4J4	1	1.152	0.789	0.531	0.579	0.391	0.980333	0.500333	0.510371	-0.970383	0.0158659	yes	down
Q69SV0	1	0.765	0.656	0.409	0.505	0.407	0.807	0.440333	0.545642	-0.873973	0.0262459	yes	down
Q2QS13	1	1.284	1.237	0.657	0.616	0.574	1.17367	0.615667	0.524567	-0.930801	0.00359839	yes	down
Q8H513	1	1.295	1.086	0.694	0.666	0.765	1.127	0.708333	0.628512	-0.669987	0.0105748	yes	down
Q8LN31	1	1.226	0.991	0.599	0.702	0.62	1.07233	0.640333	0.59714	-0.743858	0.00650904	yes	down
A0A0P0VD31	1	1.136	1.005	0.755	0.789	0.801	1.047	0.781667	0.746578	-0.421636	0.00470231	yes	down
Q652G4	1	1.066	1.085	0.774	0.797	0.602	1.05033	0.724333	0.689622	-0.536122	0.00811631	yes	down
Q6Z7S3	1	1.223	0.972	0.711	0.741	0.787	1.065	0.746333	0.700782	-0.512961	0.0180566	yes	down
Q53PP2	1	1.14	0.924	0.733	0.78	0.758	1.02133	0.757	0.741188	-0.432089	0.0150303	yes	down
C7IWB6	1	1.083	0.843	0.805	0.771	0.692	0.975333	0.756	0.77512	-0.367509	0.0480894	yes	down
B7FA27	1	1.126	0.941	0.678	0.746	0.616	1.02233	0.68	0.665145	-0.588259	0.00665641	yes	down
Q7F0H8	1	1.494	1.135	0.615	0.546	0.666	1.20967	0.609	0.503444	-0.990095	0.0165951	yes	down
Q0J1C5	1	1.077	0.948	0.646	0.805	0.672	1.00833	0.707667	0.701818	-0.510831	0.00828515	yes	down
A0A0P0X6Z4	1	1.143	0.868	0.75	0.688	0.638	1.00367	0.692	0.689472	-0.536436	0.0220782	yes	down
Q0DTD2	1	0.757	0.721	0.52	0.548	0.554	0.826	0.540667	0.65456	-0.611402	0.0318694	yes	down
Q84ZR9	1	1.132	0.938	0.868	0.796	0.788	1.02333	0.817333	0.798697	-0.32428	0.0302041	yes	down
Q5SMQ9	1	1.145	0.917	0.422	0.466	0.454	1.02067	0.447333	0.438276	-1.19009	0.00107793	yes	down
Q10KT9	1	1.023	1.063	0.597	0.775	0.698	1.02867	0.69	0.670771	-0.576107	0.00346597	yes	down
Q7XN85	1	0.822	0.743	0.45	0.49	0.456	0.855	0.465333	0.54425	-0.87766	0.00718274	yes	down
Q6K647	1	1.248	0.842	0.652	0.7	0.613	1.03	0.655	0.635922	-0.653078	0.0360766	yes	down
Q6ZG50	1	1.054	0.76	0.632	0.578	0.449	0.938	0.553	0.589552	-0.762308	0.0217245	yes	down
Q6K5X7	1	1.289	1.222	0.649	0.58	0.685	1.17033	0.638	0.545144	-0.875291	0.00454066	yes	down
Q6ATB2	1	1.108	1.325	0.665	0.541	0.596	1.14433	0.600667	0.524905	-0.929871	0.00598031	yes	down
Q75L83	1	1.271	1.099	0.605	0.631	0.598	1.12333	0.611333	0.544214	-0.877755	0.00303346	yes	down
Q84QW0	1	1.417	0.853	0.487	0.438	0.393	1.09	0.439333	0.403058	-1.31094	0.0190512	yes	down
Q75HT8	1	1.204	0.985	0.672	0.689	0.684	1.063	0.681667	0.641267	-0.641003	0.00574905	yes	down
Q6L4W5	1	1.081	0.973	0.563	0.429	0.559	1.018	0.517	0.507859	-0.977501	0.000787971	yes	down
