# Supplementary material for: The Phosphoproteomic Response of Rice Seedlings to Cadmium Stress
Source: Int J Mol Sci. 2017 Sep 27;18(10):2055. doi: 10.3390/ijms18102055 (PMC5666737; doi:10.3390/ijms18102055)
Supplement: Supplementary file 1 [file ijms-18-02055-s001.zip › Additional file 6 -Table S6.xlsx]

## Sheet: Table S6
Additional file 6-Table S6: DP proteins in PPI analysis.
accession	description	function
Q0D4F7	RLK	RECEPTOR-LIKE PROTEIN KINASE (RLK),putative
Q0DAD7	RLK	LRR receptor-like kinase (RLK), putative,
Q10BA4	CaMK	calmodulin depedent protein kinases (CaMK), expressed
Q10MY9	OSK3	Serine/threonine protein kinase OSK3, calcium/calmodulin depedent protein kinases (CAMK), expressed
Q2QXA8	Ser-Thr/Tyr_kinase	Ser-Thr/Tyr_kinase, putative, expressed
Q5JNI5	Ser/Thr_kinase	serine/threonine protein kinase (Ser/Thr_kinase), putative, expressed
Q5VMI1	Ser/Thr_kinase	protein serine/threonine kinase activity (Ser/Thr_kinase), putative, expressed
Q5Z7P1	Ser/Thr_kinase	transmembrane receptor protein serine/threonine kinase Cx32 (Ser/Thr_kinase), chloroplast precursor,
Q6AVQ3	MAPK	CGMC_GSK.5 - CGMC includes CDA, MAPK, GSK3, and CLKC kinases, expressed
Q6K1X9	Tyr_kinase	non-receptor tyrosine kinase (Tyr_kinase) spore lysis A, putative, expressed
Q6Z2V3	DSM1	drought-hypersensitive mutant1,DSM1
Q6ZI44	SAPK6	tress-activated protein kinase(SAPK6)
Q6ZKL8	PP2C	Probable protein phosphatase 2C 66
Q7F0H8	phosphatase	protein serine/threonine phosphatase activity
Q7XUF9	Ser/Thr_kinase	inactive receptor kinase At1g27190 precursor, Serine/threonine protein kinase domain containing protein (Ser/Thr_kinase), putative, expressed
Q7XXN2	Ser/Thr_kinase	protein serine/threonine kinase activity (Ser/Thr_kinase), putative, expressed
Q84JI0	PP2C	Probable protein phosphatase 2C 30
Q8H085	Ser/Thr_kinase	protein serine/threonine kinase activity (Ser/Thr_kinase), putative, expressed
Q8W3C9	RLK	receptor-like protein kinase (RLK), putative, expresse
