# Supplementary material for: The Phosphoproteomic Response of Rice Seedlings to Cadmium Stress
Source: Int J Mol Sci. 2017 Sep 27;18(10):2055. doi: 10.3390/ijms18102055 (PMC5666737; doi:10.3390/ijms18102055)
Supplement: Supplementary file 1 [file ijms-18-02055-s001.zip › Additional file 7-Table S7.xlsx]

## Sheet: Table S7
Additional file 7: Table S7: primers for RT-PCR
Accession	Primer name	Sequence (5'-3')
Q7XX94	Os04g0195000F	CGATGATGAGTTATGGGAGG
	Os04g0195000R	CCCGCAACCTTGGTATTT
Q84M73	Os03g0857400F	GACAACCTCAAGGAGGAGC
	Os03g0857400R	TTCCGTCTTTCTTCAATCTG
Q2R432	Os11g0490900F	AATTCCCAAGGAGCTACTACCG
	Os11g0490900R	GTCGTCACCACCACCGTCT
Q2R4Z4	Os11g0454300F	AGCTCGTCTGAGGATGATGGAA
	Os11g0454300R	GCTGCTGCTCGCCCTTGTT
Q5SMQ9	Os02g0743400F	AAGCTCATCCGCAACCCG
	Os02g0743400R	CTCGAAGTTCCACCTGAAGCA
Q7X8W5	Os05g0164100F	CCGCCTGACCACGAAACA
	Os05g0164100R	GGGTCGGACCTTCCTCAAT
Q84QW0	Os08g0525000F	GTCACCTCCGCCTACTACCG
	Os08g0525000R	AGTGCTTTGCCTTCCTCTAC
Q8S3S1	Os02g0708400F	ACGGCCTTCTTTGGTGTTGC
	Os02g0708400R	ACGTCTGGGTTAGCTGTGCC
Q651D5	Os09g0541000F	GGAAAGACCACTGGATCTTCTG
	Os09g0541000R	CACGCTGGTGCTCCTGAA
Q7XLR1	Os04g0233400F	CTGCTGCTGGCGAGGAAGGT
	Os04g0233400R	CCGTTGGCGTTGTACTGGTGC
Q6ATB2	Os05g0161500F	AACGACGCCGCCGTCTTTGG
	Os05g0161500R	CAGCATGATGTCCTTGAGCCTTTT
Q8H5N9	Os07g0448800F	CACCGACCCCAAGCGCAACG
	Os07g0448800R	GACCATGAACACGGCGAAGC
Q5JMT5	Os01g0961200F	TGATTCCAACGGGATGCTCT
	Os01g0961200R	GCCACATTTGTTTCGTCAGG
Q5W769	Os05g0352800F	GGGTGTTCGCCCAACTGATC
	Os05g0352800R	GCTTGCTGTGGCTCTTTCGT
Q6ZFM7	Os07g0582400F	CGCTCGCCTGGGTGTTCTTC
	Os07g0582400R	CCTTGGCTGGCTCGTCTGATT
Q94DL7	Os01g0963600F	AGCAGGAGTACTACAAGCGGGAGG
	Os01g0963600R	CGCCTGGTGCCCCTCATAGA
Ubquitin	ubquitinF	CACCCTGGCTGACTACAACA
	ubquitinR	TTCTTCTTGCGGCAGTTGAC
